# Supplementary material for: Context specificity of translation inhibitors revealed by toe-seq
Source: Research Square preprint supplement (doi:10.21203/rs.3.rs-3832009/v1), 2024-04-03
Supplement: Supplementary file 1 [file 01cb146f3da8fcf6dcf96fe4.xlsx]

## Sheet: Title
Supplementary table 2
Ribosome stalling sites, positional, amino acid and codon preferences of ribosome stalling sites, preferences of stalling at combinations of codons and corresponding amino acids in different sites and its significance for translation inhibition by Tet.

## Sheet: Codon heatmap
Stop efficiency at the corresponging triplet in the -2nd position while mRNA codon with specified index number is located in the P-site													Stop efficiency at the corresponging triplet in the E-site while mRNA codon with specified index number is located in the P-site													Stop efficiency at the corresponging triplet in the P-site while mRNA codon with specified index number is located in the P-site													Stop efficiency at the corresponging triplet in the A-site while mRNA codon with specified index number is located in the P-site
-2		Index number of mRNA codon located in the P-site											E		Index number of mRNA codon located in the P-site											P		Index number of mRNA codon located in the P-site											A		Index number of mRNA codon located in the P-site
		4	5	6	7	8	9	10	11	12	13				3	4	5	6	7	8	9	10	11	12				2	3	4	5	6	7	8	9	10	11				1	2	3	4	5	6	7	8	9
P	CCC	-0.0213167	-0.0134375	-0.0137077	-0.0177492	-0.0160375	-0.0140982	-0.0149065	-0.0153886	-0.0140359	-0.0102315		P	CCC	-0.013128	-0.0133889	-0.0256764	-0.0175696	-0.0221323	-0.0232113	-0.0230909	-0.0234196	-0.016454	-0.0138946		P	CCC	0.00862179	-0.0126937	-0.0309166	-0.0324738	-0.0180872	-0.0346385	-0.031428	-0.0267623	-0.0236419	-0.0178251		P	CCC	0.199822	0.0115578	-0.00975025	-0.024911	-0.0129129	-0.0138054	-0.0350752	-0.0272246	-0.021698
P	CCT	-0.0151296	-0.0205317	-0.00906761	-0.0287204	-0.0161168	-0.0124673	-0.0135961	-0.00928052	-0.0103743	-0.00918337		P	CCT	-0.0144383	-0.0280343	-0.0208061	-0.0192799	-0.029534	-0.0243243	-0.0224	-0.0220372	-0.0208938	-0.0103094		P	CCT	0.0111619	-0.012333	-0.0283149	-0.0239124	-0.014544	-0.0338802	-0.024839	-0.0229139	-0.0189188	-0.0126559		P	CCT	0.226325	0.0139396	-0.0159364	-0.0234606	-0.0186648	-0.0236772	-0.0310418	-0.0267683	-0.0223791
P	CCA	-0.0173046	-0.012623	-0.00696542	-0.0282932	-0.0141189	-0.014114	-0.00813547	-0.00734794	-0.009144	-0.0048114		P	CCA	-0.00650451	-0.0224431	-0.0240053	-0.0166166	-0.0386445	-0.023129	-0.0255048	-0.0232428	-0.0138207	-0.00146448		P	CCA	0.0272048	-0.0191561	-0.0359363	-0.0242223	-0.012525	-0.0323188	-0.0350663	-0.0311494	-0.0190323	-0.0119785		P	CCA	0.263251	0.0229206	-0.00444223	-0.0171465	-0.015279	-0.00554256	-0.030139	-0.0199785	-0.0234582
P	CCG	-0.0194802	-0.0151603	-0.0143486	-0.0173864	-0.0141357	-0.0137158	-0.0107333	-0.0100161	-0.0157842	-0.00910008		P	CCG	-0.0151977	-0.0282147	-0.0196883	-0.0110335	-0.0288028	-0.0252322	-0.0213615	-0.0169313	-0.0172932	-0.0150258		P	CCG	0.0234063	-0.0138487	-0.0273267	-0.0244261	-0.0181115	-0.0380113	-0.0278201	-0.0244866	-0.0234054	-0.0110603		P	CCG	0.257769	0.0201279	-0.0151817	-0.0217355	-0.0240551	-0.0201795	-0.0251825	-0.0243761	-0.0209656
L	CTC	-0.0211462	-0.0147151	-0.00896885	-0.0205446	-0.0193975	-0.0144335	-0.0163298	-0.0128498	-0.0145345	-0.0117017		L	CTC	-0.00170591	-0.0176128	-0.0105032	-0.00475238	-0.0251293	-0.0201637	-0.0143715	-0.013452	-0.00872597	-0.0112018		L	CTC	0.0279541	-0.00715957	-0.0161086	-0.0121838	-0.0166918	-0.0260632	-0.0157304	-0.0121934	-0.013416	-0.0140146		L	CTC	0.191907	0.0154673	-0.0124837	-0.0195805	-0.0167222	-0.0154382	-0.0211088	-0.0209503	-0.0165928
L	CTT	-0.0101068	-0.0102529	-0.0185801	-0.0302179	-0.020435	-0.0164992	-0.00908128	-0.0163296	-0.0155628	-0.0119823		L	CTT	-0.00638742	-0.0163545	-0.00951699	-0.0112685	-0.0186223	-0.0248042	-0.0143573	-0.0133634	-0.00726948	-0.0142236		L	CTT	0.0255729	-0.0128462	-0.0260945	-0.0191122	-0.0159358	-0.0326569	-0.0229274	-0.00888399	-0.0137472	-0.0142867		L	CTT	0.224295	0.00261909	-0.0300946	-0.0346202	-0.0107372	-0.0236213	-0.0284299	-0.0174503	-0.0170723
L	CTA	-0.0219323	-0.0213406	-0.0220044	-0.0191508	-0.0213244	-0.0138357	-0.0155234	-0.00964726	-0.0104442	-0.0158964		L	CTA	-0.0011666	-0.0107705	-0.0102699	-0.0112014	-0.00549326	-0.0140907	-0.00957104	0.00169217	-0.00262519	-0.014611		L	CTA	0.0144166	-0.00596809	-0.024235	-0.0106822	-0.00973227	-0.025315	-0.0190061	-0.0132456	-0.00531496	-0.00665884		L	CTA	0.229955	-0.0177763	-0.0217414	-0.0363476	-0.0435015	-0.0201183	-0.0532199	-0.0386007	-0.02003
L	CTG	-0.0321872	-0.0117956	-0.0156792	-0.0173001	-0.0139753	-0.0136816	-0.0147016	-0.00497573	-0.00916181	-0.0142948		L	CTG	-0.013427	-0.0145264	-0.0164331	-0.0032396	-0.0178655	-0.01997	-0.0170934	-0.010245	-0.00412474	-0.0102384		L	CTG	0.0325278	-0.0079812	-0.0163924	-0.014262	-0.0111128	-0.013579	-0.0173524	-0.00873461	-0.013233	-0.00880296		L	CTG	0.272477	0.0137916	-0.0111382	-0.0227923	-0.0220052	-0.0147829	-0.0294267	-0.0180862	-0.0105852
H	CAC	-0.0130766	-0.0186541	-0.00977542	-0.0199633	-0.0211298	-0.0119242	-0.012394	-0.0115362	-0.00881051	-0.00538174		H	CAC	-0.00325562	-0.0213434	-0.00924829	-0.0134158	-0.0179329	-0.0171278	-0.0123259	-0.0139692	-0.0145801	-0.0141344		H	CAC	0.0451695	-0.00244266	-0.0134029	-0.0188264	-0.0102273	-0.0259463	-0.0200622	-0.0144529	-0.0114634	-0.0165593		H	CAC	0.275509	0.0360144	-0.0101125	-0.0190827	-0.0169164	-0.0137681	-0.0196791	-0.0173952	-0.0181831
H	CAT	-0.0193565	-0.00946332	-0.0190923	-0.0208496	-0.0212978	-0.00963407	-0.0172804	-0.0179246	-0.0153686	-0.00782819		H	CAT	-0.0051433	-0.0203807	-0.0134937	-0.00933515	-0.0213181	-0.0178796	-0.0136752	-0.0121092	-0.0166656	-0.00874128		H	CAT	0.0174768	-0.0120982	-0.0190753	-0.0160979	-0.0197083	-0.0291575	-0.021152	-0.0163123	-0.0120006	-0.0189095		H	CAT	0.302027	0.031263	-0.00860392	-0.0141075	-0.021892	-0.0242891	-0.0280138	-0.0188549	-0.0169285
Q	CAA	-0.0206371	-0.0159949	-0.0108139	-0.0214575	-0.019471	-0.0112917	-0.0215431	-0.0161717	-0.0167098	-0.0227175		Q	CAA	-0.00828885	-0.0162048	-0.0129574	-0.0106496	-0.0166719	-0.0201241	-0.00975523	-0.00866947	-0.00990347	-0.0161261		Q	CAA	0.037265	-0.00413207	-0.00152965	-0.0105501	-0.0118753	-0.0268071	-0.0162147	-0.0126891	-0.0148311	-0.00633469		Q	CAA	0.283202	0.0289139	-0.00386814	-0.00912589	-0.0112234	-0.015743	-0.0234124	-0.017751	-0.0114124
Q	CAG	-0.032636	-0.0125165	-0.00730344	-0.0129226	-0.016475	-0.0139306	-0.0140092	-0.0148894	-0.00471916	-0.0106692		Q	CAG	-0.00617921	-0.0253846	-0.0107034	-0.013687	-0.0243842	-0.0189313	-0.00481738	-0.00723567	-0.0103382	-0.0118947		Q	CAG	0.0267092	-0.0115734	-0.0120074	-0.00128813	-0.0140846	-0.0201312	-0.0117734	-0.012858	-0.00733516	-0.012038		Q	CAG	0.316263	0.0335936	-0.00878209	-0.0229104	-0.0194549	-0.00976408	-0.0174574	-0.0190733	-0.0125396
R	CGC	-0.0218895	-0.0192182	-0.00899353	-0.0260564	-0.024236	-0.0147194	-0.00999511	-0.00964211	-0.0170503	-0.00788242		R	CGC	-0.0174814	-0.017545	-0.0109771	-0.0185509	-0.0189238	-0.0155868	-0.0127528	-0.0138395	-0.0151527	-0.0186905		R	CGC	0.0239953	-0.00892456	-0.0139753	-0.00877691	-0.00506407	-0.0177794	-0.0204813	-0.0145902	-0.0164648	-0.0120341		R	CGC	0.263458	0.0282686	-0.00505397	-0.0193453	-0.0130652	-0.0161668	-0.0210811	-0.0185513	-0.0139377
R	CGT	-0.0292763	-0.0225679	-0.0202405	-0.0245468	-0.029367	-0.0147957	-0.0144306	-0.00970757	-0.016116	-0.00785273		R	CGT	-0.0144857	-0.0215553	-0.0101275	-0.0206717	-0.0254777	-0.0176785	-0.0150251	-0.012833	-0.0208425	-0.016552		R	CGT	0.0131146	-0.0176904	-0.0187941	-0.0162127	-0.0206846	-0.0167418	-0.0224579	-0.013347	-0.0140714	-0.0190305		R	CGT	0.287709	0.0200031	-0.0115359	-0.0233678	-0.0144778	-0.014835	-0.0157326	-0.017951	-0.0146052
R	CGA	-0.0164352	-0.014608	-0.0234439	-0.0180097	-0.0186231	-0.01162	-0.0105166	-0.00760483	-0.00955791	-0.00141758		R	CGA	-0.0105936	-0.0140585	-0.00924619	-0.00788669	-0.0272489	-0.0134765	-0.00917885	-0.0165665	-0.00479391	-0.0161491		R	CGA	0.00870983	-0.016743	-0.0176516	-0.0198721	-0.0229034	-0.0277487	-0.021945	-0.00845775	-0.0157544	-0.0179721		R	CGA	0.251708	0.0108113	-0.0179593	-0.0328677	-0.0125787	-0.0168796	-0.0294691	-0.0173998	-0.0233814
R	CGG	-0.0119571	-0.0156275	-0.00462271	-0.0221933	-0.0157373	-0.0150776	-0.0111537	-0.0110125	-0.00902713	-0.0126714		R	CGG	-0.00660435	-0.0111872	-0.00958893	-0.00859042	-0.017362	-0.00977753	-0.0102247	-0.00650108	-0.0114867	-0.0107171		R	CGG	0.0327306	-0.00598064	-0.0159751	-0.00943978	-0.00779397	-0.0188297	-0.0142381	-0.00783559	-0.0126036	-0.00477127		R	CGG	0.238303	0.0196494	-0.00171048	-0.0139175	-0.00852332	-0.0063554	-0.0233439	-0.0121408	-0.0115351
S	TCC	-0.0236162	-0.0186143	-0.0154757	-0.017571	-0.0199415	-0.0141492	-0.0164831	-0.0231921	-0.00655787	-0.0107852		S	TCC	-0.0145339	-0.0107028	-0.0181997	-0.0172754	-0.0244147	-0.0175446	-0.0203543	-0.0208561	-0.0133193	-0.00887198		S	TCC	0.0165209	-0.00628131	-0.0210933	-0.0159917	-0.00963474	-0.0133106	-0.0174797	-0.0169793	-0.0140302	-0.0155713		S	TCC	0.20778	0.0262209	-0.014785	-0.021359	-0.0176207	-0.0157948	-0.0135269	-0.0183764	-0.0127281
S	TCT	-0.0277698	-0.0238351	-0.0192288	-0.017538	-0.0177292	-0.0131691	-0.0113812	-0.0136943	-0.0191971	-0.00520656		S	TCT	-0.0120224	-0.0229464	-0.0288168	-0.0098764	-0.0215965	-0.0178607	-0.0109876	-0.0189488	-0.00704219	-0.0121617		S	TCT	0.0276608	-0.0113849	-0.019134	-0.00959456	-0.00513861	-0.0172348	-0.0173446	-0.00787467	-0.00860262	-0.0077643		S	TCT	0.27126	0.024549	-0.0164811	-0.0231225	-0.0242259	-0.0121348	-0.0149701	-0.0191745	-0.0131766
S	TCA	-0.0267718	-0.0165347	-0.0154637	-0.0272367	-0.0216961	-0.0134096	-0.0141748	-0.00977563	-0.00358811	-0.00459896		S	TCA	-0.0127478	-0.011537	-0.00938503	-0.0151507	-0.0247955	-0.0189521	-0.0202465	-0.00834051	-0.00955709	-0.0182269		S	TCA	0.00389549	-0.0134179	-0.0302919	-0.0142924	-0.0189463	-0.0268049	-0.0148784	-0.0191115	-0.0142071	-0.0101567		S	TCA	0.287636	0.0255341	-0.0151683	-0.01382	-0.0211643	-0.0136571	-0.0221215	-0.0182762	-0.0158817
S	TCG	-0.0185694	-0.00966409	-0.00489672	-0.030034	-0.0220535	-0.010372	-0.0132408	-0.0131971	-0.00801482	-0.0102		S	TCG	-0.00724277	-0.0245807	-0.0195301	-0.013222	-0.0277642	-0.0160137	-0.00846519	-0.0155024	-0.00642676	-0.0166966		S	TCG	0.00804085	-0.00917418	-0.0226421	-0.0221289	-0.0133979	-0.0248187	-0.0115217	-0.0132925	-0.0100633	-0.0078813		S	TCG	0.284618	0.0322202	-0.0194388	-0.018107	-0.015711	-0.0112698	-0.0223236	-0.0207653	-0.0118963
F	TTC	-0.0303163	-0.027286	-0.0173365	-0.0353054	-0.0184522	-0.0132767	-0.0183319	-0.0227879	-0.00928754	-0.0101526		F	TTC	-0.00797994	-0.0183956	-0.0143981	-0.0170492	-0.0278486	-0.015654	-0.0104866	-0.0127846	-0.0110313	-0.0109342		F	TTC	0.0236198	9.65612e-05	-0.0230481	-0.0203932	-0.014004	-0.0176183	-0.0183519	-0.0142375	-0.0218909	-0.0106259		F	TTC	0.219647	0.0387406	-0.00936854	-0.0210834	-0.00828344	-0.0129097	-0.0228406	-0.0149059	-0.011671
F	TTT	-0.0166272	-0.0132068	-0.0183093	-0.0218288	-0.0161655	-0.0216208	-0.0114701	-0.0130169	-0.0046474	-0.0056448		F	TTT	-0.00483783	-0.00634589	-0.00900009	-0.00939114	-0.0290191	-0.0100108	-0.00621013	-0.0138472	-0.0125115	-0.0061601		F	TTT	0.022357	-0.00151805	-0.0280708	-0.0217754	-0.0207938	-0.012608	-0.0194245	-0.0167581	-0.0268073	-0.0182776		F	TTT	0.261231	0.0284581	-0.0202905	-0.0145327	-0.0180198	-0.00180633	-0.0268931	-0.0151986	-0.0218586
L	TTA	-0.0204528	-0.00705402	-0.00465612	-0.0281949	-0.0307855	-0.0128535	-0.00951828	-0.0145354	-0.0103982	-0.0194684		L	TTA	-0.00267935	-0.00441055	-0.0174481	0.00834478	-0.0142449	-0.014199	-0.0228559	-0.00778942	-0.00846105	0.00148819		L	TTA	0.023788	0.00298527	-0.0188085	-0.0118221	-0.00196359	-0.0320879	-0.0181824	-0.0193179	-0.00794906	-0.0125615		L	TTA	0.267899	0.0261982	-0.0275289	-0.0324014	-0.0332939	-0.0311794	-0.0210557	-0.0215498	-0.0148655
L	TTG	-0.000160552	-0.00635487	-0.0197854	-0.0135545	-0.0196369	-0.00835001	-0.00686253	-0.0100872	-0.0117522	-0.0150247		L	TTG	-0.00164973	-0.00506962	-0.0169393	-0.0176556	-0.0198376	-0.013243	-0.0110679	-0.011952	-0.0126372	-0.0016274		L	TTG	0.00771504	0.00163555	-0.0182406	-0.0108308	-0.00327558	-0.0228316	-0.017431	-0.0112662	-0.00556625	-0.00970689		L	TTG	0.252635	0.0227602	-0.00776075	-0.0254182	-0.0128002	-0.0150406	-0.0257253	-0.0174948	-0.0112847
Y	TAC	-0.0167553	-0.0024677	-0.0203818	-0.0215822	-0.0142887	-0.0172073	-0.0122713	-0.00281971	-0.0123034	-0.00795351		Y	TAC	-0.00829961	-0.0197897	-0.0173454	-0.0121749	-0.0157703	-0.0167185	-0.0169572	-0.0103425	-0.00794844	-0.0166924		Y	TAC	0.0275888	-0.00933397	-0.0265374	-0.0163442	-0.0155823	-0.0266172	-0.0167626	-0.018974	-0.00411356	-0.00361463		Y	TAC	0.233475	0.0472772	-0.0062135	-0.0197105	-0.00856815	-0.00708398	-0.0233775	-0.0222953	-0.014785
Y	TAT	-0.0170178	-0.0139653	-0.0110583	-0.0255707	-0.0175293	-0.00910694	-0.00899363	-0.0149668	-0.0124419	-0.00634749		Y	TAT	-0.00260084	-0.00871334	-0.00932872	-0.0145375	-0.0394154	-0.0231586	-0.0134871	-0.0108548	-0.0129941	-0.00375797		Y	TAT	0.0350346	-0.0107315	-0.0105354	-0.00604733	0.000731095	-0.0436532	-0.0217487	-0.00615332	-0.00795373	-0.0305347		Y	TAT	0.250374	0.0369505	-0.00752205	-0.018517	-0.029954	0.00404563	-0.0221445	-0.0277825	-0.0101483
*	TAA	0	0	0	0	0	0	0	0	0	0		*	TAA	0	0	0	0	0	0	0	0	0	0		*	TAA	0	0	0	0	0	0	0	0	0	0		*	TAA	0.0613772	-0.196832	-0.0736212	-0.0911012	-0.129961	-0.0936865	-0.0560053	-0.0552371	-0.057813
*	TAG	0	0	0	0	0	0	0	0	0	0		*	TAG	0	0	0	0	0	0	0	0	0	0		*	TAG	0	0	0	0	0	0	0	0	0	0		*	TAG	0.0750113	-0.126895	-0.0584741	-0.108295	-0.0946904	-0.0579306	-0.0920297	-0.0504637	-0.0466851
C	TGC	-0.021031	-0.0254617	-0.00356268	-0.0302876	-0.0195761	-0.0150924	-0.0124665	-0.0149528	-0.0163363	-0.0061571		C	TGC	-0.0181063	-0.0125917	-0.0172503	-0.00905986	-0.0230085	-0.0163801	-0.0117715	-0.0161733	-0.0113275	-0.0114562		C	TGC	0.0193266	-0.0105009	-0.0188148	-0.0198603	-0.00715186	-0.0206855	-0.0183452	-0.0088793	-0.0139856	-0.013872		C	TGC	0.288772	0.037941	-0.0107256	-0.0190519	-0.0280333	-0.00891482	-0.0223853	-0.0196153	-0.0187319
C	TGT	-0.00957663	-0.0178079	-0.00660389	-0.024237	-0.0223681	-0.0131808	-0.019485	-0.0105352	-0.0100251	-0.0121647		C	TGT	-0.00763252	-0.0265694	-0.018248	-0.0134918	-0.0145881	-0.0116969	-0.0149295	-0.0122282	-0.00607926	-0.00844759		C	TGT	0.0133159	-0.00489155	-0.024185	-0.0186273	-0.00571574	-0.0161312	-0.0227794	-0.00731885	-0.0175393	-0.0148243		C	TGT	0.26716	0.0237492	-0.0229244	-0.0239058	-0.0127306	-0.0124606	-0.0350054	-0.0184231	-0.0117336
*	TGA	0	0	0	0	0	0	0	0	0	0		*	TGA	0	0	0	0	0	0	0	0	0	0		*	TGA	0	0	0	0	0	0	0	0	0	0		*	TGA	0.122737	-0.15657	-0.0757046	-0.0883815	-0.0742797	-0.0563627	-0.0554509	-0.0485686	-0.0389424
W	TGG	-0.00955343	-0.0143826	-0.00577654	-0.0219698	-0.0143553	-0.0075984	-0.00974516	-0.0100641	-0.00935985	-0.00998755		W	TGG	-0.00507882	-0.0236272	-0.020224	-0.00645167	-0.0246584	-0.0145912	-0.0118403	-0.00837813	-0.0134395	-0.0071681		W	TGG	0.0128431	-0.0055715	-0.0189087	-0.0231924	-0.00477989	-0.0148842	-0.017346	-0.00730554	-0.0100889	-0.0166917		W	TGG	0.24837	0.0401086	-0.0020502	-0.00246345	-0.0125782	0.00249227	-0.00921908	-0.00512407	-0.00152525
T	ACC	-0.0201272	-0.0189896	-0.0176512	-0.0341037	-0.0197339	-0.0166685	-0.0190071	-0.0207555	-0.00899007	-0.00511872		T	ACC	-0.0146982	-0.0303766	-0.0103989	-0.0110649	-0.0229497	-0.0162228	-0.0131717	-0.0147927	-0.0153678	-0.0152998		T	ACC	0.0397876	-0.00306181	-0.0210378	-0.0105837	-0.0124571	-0.00982954	-0.0204897	-0.00873582	-0.0134991	-0.00570637		T	ACC	0.27768	0.0387811	-0.0106493	-0.0174049	-0.0126768	-0.0139429	-0.021396	-0.0218346	-0.0153089
T	ACT	-0.0228336	-0.0137873	-0.0186971	-0.0310199	-0.0108724	-0.0115631	-0.0208846	-0.00899589	-0.0116589	-0.00899378		T	ACT	-0.0125069	-0.022595	-0.010348	-0.0147151	-0.0334657	-0.0181314	-0.0137284	-0.0118297	-0.0145875	-0.00639131		T	ACT	0.0140287	-0.0123707	-0.00579011	-0.0184323	-0.014862	-0.021066	-0.0197366	-0.0122629	-0.0143459	-0.00656544		T	ACT	0.283586	0.0249025	0.00642529	-0.0120365	-0.0110973	-0.014396	-0.0249908	-0.0188627	-0.0134096
T	ACA	-0.0182544	-0.010369	-0.00751998	-0.0265237	-0.0156837	-0.019892	-0.0188428	-0.0114561	-0.00912385	-0.00644217		T	ACA	-0.00616124	-0.022427	-0.0109379	-0.0201666	-0.0280773	-0.0196909	-0.0143987	-0.00850143	-0.00399938	-0.0205604		T	ACA	0.00550537	-0.00440025	-0.017273	-0.0151403	-0.0187169	-0.0288624	-0.0142046	-0.01195	-0.00744996	-0.00853986		T	ACA	0.290477	0.0500265	-0.00670317	-0.0166487	-0.0129023	-0.0103085	-0.0350886	-0.0236136	-0.0167565
T	ACG	-0.0113504	-0.00858176	-0.00688562	-0.0204141	-0.0197372	-0.0116769	-0.00793354	-0.0133053	-0.00916406	-0.0079362		T	ACG	-0.00925857	-0.0134055	-0.0136487	-0.0174405	-0.0178427	-0.0142536	-0.0120031	-0.0130367	-0.0153458	-0.00862798		T	ACG	0.0238463	-0.00511949	-0.0163035	-0.00971051	-0.0115972	-0.0189039	-0.0119315	-0.0136063	-0.0138597	-0.00449839		T	ACG	0.303743	0.0274822	-0.00688103	-0.00966235	-0.0176292	-0.00732388	-0.0227388	-0.0170113	-0.0130407
I	ATC	-0.0225016	-0.0169045	-0.016321	-0.0239621	-0.0208823	-0.0199645	-0.0116687	-0.017939	-0.00747178	-0.0164661		I	ATC	-0.00886882	-0.0113974	-0.0142725	-0.00629988	-0.0221933	-0.0191863	-0.0111652	-0.00989583	-0.0112434	-0.013709		I	ATC	0.0293571	-0.00772975	-0.0139751	-0.00636743	-0.0153231	-0.0145252	-0.0220477	-0.01455	-0.0101159	-0.0100977		I	ATC	0.284222	0.037964	-0.00290199	-0.0217701	-0.0132583	-0.00953305	-0.0220034	-0.0145864	-0.00903099
I	ATT	-0.0219489	-0.0152198	-0.0166989	-0.0197517	-0.0135454	-0.0164583	-0.0135025	-0.019979	-0.0227148	-0.00722306		I	ATT	-0.0132356	-0.0279362	-0.0244845	-0.010542	-0.0265117	-0.0165979	-0.0184679	0.00122584	0.00310505	-0.00751829		I	ATT	0.0204529	-0.0122961	-0.0164379	-0.0136543	-0.0121089	-0.0281515	-0.0129678	-0.00818815	-0.0179712	-0.0216624		I	ATT	0.270217	0.0234165	-0.0045826	-0.0076456	-0.0118248	-0.0151055	-0.00975488	-0.0141067	-0.00823937
I	ATA	-0.0163304	-0.0111094	-0.0236402	-0.0208189	-0.0112029	-0.00690687	-0.014648	-0.0105867	-0.000896499	-0.00743579		I	ATA	-0.00323294	-0.0153577	-0.026242	-0.0245463	-0.0208436	-0.0213047	-0.0116174	-0.0130353	0.00202477	-0.0115309		I	ATA	0.0195099	-0.00186732	-0.00895038	-0.0178059	-0.0150955	-0.0182984	-0.0123443	-0.0220864	-0.000789602	-0.00588259		I	ATA	0.268463	0.0245941	-0.013057	-0.00748342	-0.018924	-0.0228337	-0.0212738	-0.0237681	-0.0144789
M	ATG	-0.0124781	-0.0152471	-0.0080334	-0.0215852	-0.0184469	-0.0101153	-0.020704	-0.00306415	-0.0137256	-0.0180453		M	ATG	0.00249966	-0.0126951	-0.0162571	-0.0066075	-0.0256987	-0.0134685	-0.0131322	-0.00391983	-0.00599603	-0.0158297		M	ATG	0.111346	0.00608657	-0.00802856	-0.00248811	0.00464125	-0.0197024	-0.00577862	-0.00619163	-0.00293353	-0.00336634		M	ATG	0.205343	0.010155	-0.00568487	-0.00472135	-0.00690227	-0.00231197	-0.0258106	-0.0201734	-0.0092773
N	AAC	-0.019789	-0.00479941	-0.0183429	-0.0166312	-0.0241405	-0.0155393	-0.00675856	-0.0235576	-0.0137285	-0.00659305		N	AAC	-0.00602503	-0.0176573	-0.0183122	-0.010487	-0.0260127	-0.0197934	-0.0164645	-0.0139132	-0.00181624	-0.0106581		N	AAC	0.0178229	-0.0111814	-0.0247722	-0.0108829	-0.0202037	-0.0192902	-0.0166102	-0.00959976	-0.0189329	-0.0192		N	AAC	0.305392	0.0391061	0.00249948	-0.0190166	-0.00726005	-0.0167948	-0.0237533	-0.0201372	-0.0107273
N	AAT	-0.0193052	-0.0189359	-0.0205476	-0.0212275	-0.0223711	-0.0115843	-0.0147126	-0.0152798	-0.027338	-0.0206933		N	AAT	-0.00832659	-0.0150597	-0.0135168	-0.0230212	-0.0106509	-0.014332	-0.00895054	-0.00330285	-0.0125923	-0.0127033		N	AAT	0.0170211	-0.0141523	-0.0216714	-0.0173087	-0.0130309	-0.0264736	-0.0129176	-0.00934372	-0.00999154	-0.0155768		N	AAT	0.296352	0.0362722	0.00622317	-0.00967621	-0.0167013	-0.00241779	-0.0295231	-0.0252777	-0.0120452
K	AAA	-0.0156133	-0.0191667	-0.0185239	-0.0234322	-0.0212153	-0.0217568	-0.00911585	-0.00645609	-0.00346576	-0.00797951		K	AAA	-0.0083935	-0.0173582	-0.011458	-0.00304216	-0.0328197	-0.0222431	-0.00233976	-0.00308412	-0.0190409	0.00132695		K	AAA	0.00942873	-0.00346723	-0.0263692	-0.020368	-0.0169739	-0.0235319	-0.0115811	-0.0156765	-0.0117521	-0.00497839		K	AAA	0.305216	0.032062	-0.0142301	-0.0166943	-0.00531429	-0.0163166	-0.0326676	-0.0157204	-0.0194742
K	AAG	-0.0214416	-0.0164589	-0.0132103	-0.0194676	-0.0206363	-0.0192489	-0.015273	-0.00749729	-0.0191958	-0.0140456		K	AAG	-0.0143528	-0.0121528	-0.0143046	-0.0127701	-0.0181894	-0.0142095	-0.0111986	-0.0146849	-0.0143857	-0.000818658		K	AAG	0.0167624	-0.0100357	-0.0105414	-0.0177028	-0.0198128	-0.0229963	-0.0149336	-0.00617901	-0.00852934	-0.0146078		K	AAG	0.304389	0.0337525	0.00371151	-0.0131734	-0.0122845	-0.00568107	-0.031122	-0.013601	-0.00853686
S	AGC	-0.0157935	-0.0241171	-0.0190141	-0.0214718	-0.015259	-0.0185731	-0.0176879	-0.0151555	-0.010806	-0.00661387		S	AGC	-0.0140838	-0.0219503	-0.0155694	-0.0133707	-0.0318372	-0.0210693	-0.0130398	-0.00709376	-0.0112316	-0.00944532		S	AGC	0.0138001	-0.00832211	-0.0128902	-0.0246445	-0.0159697	-0.0285019	-0.0183907	-0.0157803	-0.0111229	-0.0161845		S	AGC	0.312829	-0.0103604	-0.002571	-0.017738	-0.0180048	-0.0152962	-0.0202078	-0.0162268	-0.0117182
S	AGT	-0.0207176	-0.00763977	-0.0175117	-0.0163885	-0.0170482	-0.012467	-0.013916	-0.00116869	-0.00987393	-0.0109322		S	AGT	-0.013215	-0.0250888	-0.00838034	-0.00964242	-0.0316667	-0.0157308	-0.0124431	-0.0169972	-0.00343347	-0.0106868		S	AGT	0.00418261	-0.0130581	-0.0210336	-0.0355781	-0.0104822	-0.0239711	-0.0145299	-0.0173359	0.00163353	-0.00917242		S	AGT	0.299158	-0.00595939	-0.0101596	-0.0156723	-0.000772297	-0.011963	-0.0211584	-0.0243592	-0.0067297
R	AGA	-0.0117163	-0.00673637	-0.0251654	-0.0175361	-0.0126262	-0.0127328	-0.0096472	-0.0104644	-0.0125102	-0.00721107		R	AGA	-0.00609198	-0.0130943	-0.0126472	-0.0093539	-0.0226146	-0.0144664	-0.0115139	-0.0046906	0.00406237	-0.0133592		R	AGA	0.0171455	-0.00839144	-0.0236202	-0.0154547	-0.0100929	-0.0335255	-0.0195947	-0.00963385	-0.0204686	-0.0263044		R	AGA	0.280091	0.0184144	-0.0123763	-0.000190063	-0.00679294	-0.0138307	-0.0293557	-0.0305449	-0.0260867
R	AGG	-0.00733704	-0.0126516	-0.00495295	-0.030549	-0.0156301	-0.0178218	-0.0141996	-0.0148328	-0.0143583	-0.00737788		R	AGG	-0.0095199	-0.0131432	-0.00480477	-0.00451865	-0.016754	-0.015362	-0.00490514	-0.0105248	-0.0164549	-0.0119657		R	AGG	0.0303659	-0.00880649	-0.0110269	-0.0119958	-0.0121757	-0.0226204	-0.0104912	-0.00968741	-0.0132116	-0.00262067		R	AGG	0.256489	0.0201187	-0.00041896	-0.0126008	-0.00996591	-0.00526034	-0.0140066	-0.0171366	-0.00907966
A	GCC	-0.0202181	-0.0183638	-0.0141163	-0.0221691	-0.0192016	-0.0177074	-0.0149054	-0.0122967	-0.0127308	-0.0100569		A	GCC	-0.0125928	-0.0181083	-0.0200594	-0.0162203	-0.0247504	-0.0191355	-0.015954	-0.0174144	-0.0110574	-0.0114093		A	GCC	0.0197861	-0.009276	-0.0163549	-0.0157578	-0.0209574	-0.0222591	-0.0165019	-0.0144976	-0.0129574	-0.00879357		A	GCC	0.230979	0.0361445	-0.0142774	-0.0164536	-0.0107208	-0.0111927	-0.0202527	-0.015959	-0.0113393
A	GCT	-0.0197793	-0.0114432	-0.0275111	-0.0230711	-0.024606	-0.0198407	-0.0116494	-0.00668405	-0.00810947	-0.00793983		A	GCT	-0.00795902	-0.0315899	-0.0239819	-0.0188645	-0.0203447	-0.0219344	-0.0138931	-0.0171382	-0.0137497	-0.0149487		A	GCT	0.0129549	-0.0104839	-0.0189527	-0.0190666	-0.0223045	-0.0224492	-0.0162333	-0.00906862	-0.0113862	-0.015548		A	GCT	0.27207	0.026307	-0.00310966	-0.0138932	-0.0112634	-0.0105815	-0.0160372	-0.012302	-0.0108241
A	GCA	-0.0244436	-0.0146111	-0.0213991	-0.0259277	-0.021185	-0.0113799	-0.00796833	-0.0141743	-0.00559073	-0.00982865		A	GCA	-0.0148127	-0.0184636	-0.0125141	-0.0111162	-0.0188221	-0.020451	-0.0122336	-0.00727874	-0.00784259	-0.0195125		A	GCA	0.011942	-0.00815645	-0.0219187	-0.0128983	-0.00964937	-0.025241	-0.0171211	-0.0159637	-0.0131359	-0.0152114		A	GCA	0.319504	0.0319875	-0.00484752	-0.00802161	-0.0135796	-0.010624	-0.00785972	-0.0153998	-0.00747313
A	GCG	-0.0177967	-0.01979	-0.0117869	-0.0177136	-0.014384	-0.0115376	-0.0136139	-0.0084637	-0.0102752	-0.00577259		A	GCG	-0.0106434	-0.0221946	-0.0176628	-0.0194604	-0.0244667	-0.0189822	-0.0148466	-0.0103168	-0.0131287	-0.0122571		A	GCG	0.0163296	-0.0154351	-0.0160912	-0.00615931	-0.0119339	-0.0222973	-0.0193263	-0.0140543	-0.0150355	-0.010761		A	GCG	0.269385	0.0333146	-0.00661667	-0.0102662	-0.00963054	-0.0102278	-0.0145061	-0.0127073	-0.00870069
V	GTC	-0.0241717	-0.0184762	-0.00899723	-0.0327676	-0.0176609	-0.0148102	-0.0195191	-0.00571591	-0.0167584	-0.0106211		V	GTC	-0.0180343	-0.0266556	-0.0124429	-0.0167785	-0.0247078	-0.02213	-0.0125173	-0.0116884	-0.0111359	-0.0110793		V	GTC	0.017771	-0.0113933	-0.0180161	-0.0142409	-0.018978	-0.0223614	-0.0226735	-0.0100606	-0.0166906	-0.00772081		V	GTC	0.264674	0.02551	-0.00501931	-0.0186634	-0.0168366	-0.00893967	-0.0222491	-0.0154032	-0.0106358
V	GTT	-0.00767122	-0.0138937	-0.0276404	-0.00819856	-0.0265202	-0.0194011	-0.00794409	-0.0152837	-0.0156287	-0.00646426		V	GTT	-0.0117343	-0.0202128	-0.023303	-0.0137506	-0.0250315	-0.0173879	-0.0129548	-0.0154815	-0.0205607	-0.0221735		V	GTT	0.0114843	-0.0117218	-0.0180742	-0.0123259	-0.00594776	-0.01411	-0.0141993	-0.00900108	-0.00271159	-0.0252812		V	GTT	0.250371	0.0267838	-0.00632801	-0.0154656	-0.0156579	-0.017114	-0.0270748	-0.0156109	-0.00679943
V	GTA	-0.0318598	-0.0191251	-0.00808434	-0.0138467	-0.0154047	-0.0181154	-0.00453555	-0.0109343	-0.0120063	-0.00917047		V	GTA	-0.0137573	-0.0197819	-0.0181624	-0.0118549	-0.0242822	-0.0176661	-0.00875936	-0.00649703	-0.00834537	-0.00570434		V	GTA	0.00959992	-0.00416491	-0.0222758	-0.00308303	-0.012014	-0.0183624	-0.0101599	-0.0128959	-0.00943544	-0.0128194		V	GTA	0.289671	0.0401832	-0.0142515	-0.0199459	-0.0203876	-0.019053	-0.0209865	-0.0180534	-0.0143856
V	GTG	-0.0213182	-0.0124487	-0.00688829	-0.0306638	-0.015773	-0.0133017	-0.0224689	-0.00524556	-0.0144159	-0.00962905		V	GTG	-0.00638475	-0.0180886	-0.0165112	-0.0141184	-0.0185971	-0.020272	-0.00639163	-0.00103817	-0.0140618	-0.011363		V	GTG	0.0216632	-0.000911376	-0.0112781	-0.00994436	-0.00872091	-0.0213933	-0.00906637	-0.0028794	-0.0103114	0.00405782		V	GTG	0.244405	0.0275604	-0.00183612	-0.0156162	-0.019095	0.00509957	-0.0112358	-0.0136419	-0.00812241
D	GAC	-0.0227952	-0.0203104	-0.00840069	-0.0414724	-0.0181731	-0.0187781	-0.0111282	-0.00398656	-0.00974685	-0.00394575		D	GAC	-0.0294258	-0.0292893	-0.032144	-0.0211425	-0.033897	-0.0226085	-0.0165278	-0.0189857	-0.00904595	-0.0115701		D	GAC	0.0121174	-0.0215502	-0.0217141	-0.0259487	-0.0164284	-0.0162005	-0.013805	-0.016986	-0.012509	-0.0138604		D	GAC	0.292327	0.00726874	-0.0117891	-0.0198914	-0.0231135	-0.0187446	-0.0305047	-0.0190571	-0.0159544
D	GAT	-0.0301056	-0.0256868	-0.0266277	-0.0392701	-0.0152671	-0.0203286	-0.0122099	-0.0156555	-0.00860023	-0.00583269		D	GAT	-0.0188442	-0.0279248	-0.0168242	-0.0192178	-0.0244964	-0.0205041	-0.0213755	-0.0164673	-0.0109477	-0.011176		D	GAT	-0.00370661	-0.0187781	-0.0319615	-0.0197631	-0.0159446	-0.0266676	-0.0203464	-0.00676629	-0.0046307	-0.0186188		D	GAT	0.316058	0.0136369	-0.0205064	-0.0082714	-0.00887265	-0.0217897	-0.0384687	-0.0126952	-0.0163103
E	GAA	-0.0303426	-0.0224329	-0.0190585	-0.0316863	-0.0146744	-0.0158791	-0.00933789	-0.0147039	-0.0129022	-0.00962073		E	GAA	-0.0197857	-0.0249177	-0.0190473	-0.0105978	-0.0379845	-0.0276368	-0.0111541	-0.0123238	-0.0120597	-0.0131452		E	GAA	-0.00238373	-0.0245531	-0.0271856	-0.015453	-0.0247397	-0.0226612	-0.0163335	-0.0121066	-0.00863567	-0.0104567		E	GAA	0.340068	0.00220331	-0.0133509	-0.017517	-0.0190871	-0.00418211	-0.00306621	-0.0222021	-0.0103276
E	GAG	-0.0276005	-0.0242373	-0.0153426	-0.0200312	-0.0207923	-0.0202296	-0.0173768	-0.0171869	-0.0103504	-0.00698987		E	GAG	-0.00700614	-0.0207671	-0.0216079	-0.00980528	-0.0227208	-0.0165494	-0.0135047	-0.0153989	-0.017001	-0.00645469		E	GAG	-0.00175688	-0.0200883	-0.0204641	-0.0242125	-0.0156778	-0.0144033	-0.0142566	-0.0125805	-0.00766896	-0.00612427		E	GAG	0.294516	0.0221329	-0.0162204	-0.0174205	-0.0201074	-0.00286631	-0.0145812	-0.00880323	-0.0184902
G	GGC	-0.0163318	-0.0183539	-0.00803035	-0.0208854	-0.0160191	-0.00969894	-0.0122767	-0.00533181	-0.00675587	-0.00554491		G	GGC	-0.00753165	-0.014118	-0.0115206	-0.0123657	-0.0219042	-0.0184682	-0.0144779	-0.0113564	-0.00544757	-0.00609033		G	GGC	0.0161458	-0.00953915	-0.017975	-0.0215849	-0.0113343	-0.0231202	-0.0201399	-0.0138232	-0.00829691	-0.0111667		G	GGC	0.251071	0.020323	-0.000230922	-0.0112527	-0.0084611	-0.0110887	-0.0222874	-0.0146502	-0.0108374
G	GGT	-0.0158897	-0.0121883	-0.0117154	-0.0274321	-0.0172158	-0.0119669	-0.00900133	-0.0086733	-0.00858785	-0.00423342		G	GGT	-0.00192196	-0.0266181	-0.0146457	-0.0152393	-0.0156316	-0.0208061	-0.0158582	-0.00843642	-0.00289569	-0.00636727		G	GGT	0.013342	-0.0189081	-0.0221969	-0.0241728	-0.00338519	-0.0236514	-0.015853	-0.0158644	-0.0113102	-0.0154559		G	GGT	0.25907	0.0221882	-0.0136911	-0.0139356	-0.0110612	-0.016959	-0.0164603	-0.0171081	-0.0161284
G	GGA	-0.0123425	-0.0245973	-0.0148307	-0.0207009	-0.0210106	-0.00786754	-0.00727524	-0.00793629	-0.0139147	-0.00670323		G	GGA	-0.00213677	-0.0297382	-0.0242179	-0.0137495	-0.0203536	-0.022426	-0.0166873	-0.00747322	-0.00148829	-0.00409871		G	GGA	0.0048746	-0.0207824	-0.0383983	-0.013693	-0.0112935	-0.0290414	-0.0234359	-0.0170817	-0.0161731	-0.00756239		G	GGA	0.258456	0.0226826	-0.00884984	-0.0222308	-0.00895405	-0.00455404	-0.0159563	-0.0173126	-0.0158775
G	GGG	-0.00948993	-0.00786196	-0.00835347	-0.00952261	-0.0132579	-0.0126403	-0.0123633	-0.00164891	-0.00648002	-0.00508444		G	GGG	-0.00135104	-0.0175699	-0.0117083	-0.00870951	-0.014386	-0.0130683	-0.0105132	-0.0128079	-0.0060232	-0.00564735		G	GGG	0.0214779	-0.00427783	-0.0140683	-0.00581918	-0.0146827	-0.0214524	-0.0133027	-0.0142454	-0.00692756	-0.00424023		G	GGG	0.202906	0.0216287	-0.00474788	-0.0183234	-0.0111446	-0.00882616	-0.0263312	-0.0105926	-0.00781402
[truncated: 12 more columns]

## Sheet: P-value for codon heatmap
P-value for shuffled datasets exceeding experimental data of stop efficiency at the corresponging triplet in the -2nd position while mRNA codon with specified index number is located in the P-site													P-value for shuffled datasets exceeding experimental data of stop efficiency at the corresponging triplet in the E-site while mRNA codon with specified index number is located in the P-site													P-value for shuffled datasets exceeding experimental data of stop efficiency at the corresponging triplet in the P-site while mRNA codon with specified index number is located in the P-site													P-value for shuffled datasets exceeding experimental data of stop efficiency at the corresponging triplet in the A-site while mRNA codon with specified index number is located in the P-site
-2		Index number of mRNA codon located in the P-site											E		Index number of mRNA codon located in the P-site											P		Index number of mRNA codon located in the P-site											A		Index number of mRNA codon located in the P-site
		4	5	6	7	8	9	10	11	12	13				3	4	5	6	7	8	9	10	11	12				2	3	4	5	6	7	8	9	10	11				1	2	3	4	5	6	7	8	9
P	CCC	0.748754	0.169492	0.601196	0.0468594	0.101695	0.518445	0.820538	0.973081	0.95015	0.857428		P	CCC	0.9332	0.00897308	0.999003	0.944167	0.400798	0.998006	1	1	0.991027	0.906281		P	CCC	0.997009	0.879362	1	1	0.967099	1	1	1	1	0.997009		P	CCC	1	0.983051	0.471585	0.987039	0.0817547	0.554337	1	1	1
P	CCT	0.113659	0.908275	0.179462	0.906281	0.236291	0.286142	0.56331	0.293121	0.392822	0.597208		P	CCT	0.905284	0.995015	0.891326	0.928215	0.930209	0.994018	0.999003	1	0.997009	0.358923		P	CCT	0.946162	0.785643	0.981057	0.972084	0.618146	0.995015	0.989033	1	0.973081	0.648056		P	CCT	1	0.856431	0.955135	0.805583	0.715852	0.994018	0.956132	1	0.999003
P	CCA	0.284148	0.209372	0.0847458	0.921236	0.0468594	0.558325	0.0478564	0.143569	0.249252	0.0857428		P	CCA	0.180459	0.809571	0.971087	0.81655	1	0.975075	1	1	0.742772	0		P	CCA	0.0598205	0.996012	1	0.968096	0.402792	0.985045	1	1	0.966102	0.550349		P	CCA	0.161515	0.234297	0.0817547	0.270189	0.376869	0.0338983	0.925224	0.693918	1
P	CCG	0.48654	0.381854	0.700897	0.0438684	0.0159521	0.439681	0.132602	0.325025	0.98006	0.624128		P	CCG	0.983051	0.997009	0.925224	0.240279	0.968096	1	1	0.968096	0.985045	0.962114		P	CCG	0.112662	0.958126	0.997009	0.997009	0.953141	1	1	1	1	0.440678		P	CCG	0.351944	0.385842	0.979063	0.739781	0.998006	0.98006	0.674975	0.998006	1
L	CTC	0.624128	0.418744	0.170489	0.33001	0.70987	0.611167	0.885344	0.695912	0.907278	0.9332		L	CTC	0.0119641	0.398804	0.0767697	0.0159521	0.691924	0.765703	0.565304	0.560319	0.230309	0.45663		L	CTC	0.0488534	0.252243	0.212363	0.113659	0.79661	0.758724	0.12662	0.196411	0.51346	0.801595		L	CTC	1	0.77667	0.770688	0.509472	0.500499	0.718843	0.277168	0.799601	0.841476
L	CTT	0.0458624	0.200399	0.845464	0.888335	0.773679	0.820538	0.191426	0.885344	0.841476	0.870389		L	CTT	0.235294	0.354935	0.162512	0.39681	0.281157	0.966102	0.567298	0.52343	0.19342	0.818544		L	CTT	0.194417	0.751745	0.866401	0.714855	0.685942	0.937188	0.87338	0.0388833	0.526421	0.743769		L	CTT	0.999003	0.992024	1	0.995015	0.162512	0.958126	0.757727	0.337986	0.767697
L	CTA	0.65005	0.830508	0.879362	0.353938	0.819541	0.594217	0.72682	0.394816	0.417747	0.968096		L	CTA	0.0478564	0.0977069	0.190429	0.415753	0.00398804	0.186441	0.12662	0	0.0697906	0.759721		L	CTA	0.711864	0.259222	0.744766	0.198405	0.319043	0.656032	0.568295	0.400798	0.0468594	0.210369		L	CTA	0.986042	1	0.957129	0.998006	1	0.84347	1	1	0.892323
L	CTG	0.997009	0.174477	0.733799	0.157527	0.0807577	0.444666	0.692921	0.0408774	0.277168	0.989033		L	CTG	0.807577	0.14656	0.58325	0.0229312	0.169492	0.704885	0.819541	0.159521	0.0388833	0.363908		L	CTG	0.0159521	0.314058	0.27318	0.343968	0.333998	0.0338983	0.386839	0.0139581	0.457627	0.229312		L	CTG	0.0239282	0.837488	0.65005	0.71984	0.889332	0.609172	0.837488	0.419741	0.0658026
H	CAC	0.0588235	0.777667	0.238285	0.255234	0.937188	0.205384	0.375872	0.569292	0.210369	0.0677966		H	CAC	0.0478564	0.743769	0.0418744	0.549352	0.159521	0.350947	0.206381	0.608175	0.81655	0.854437		H	CAC	0	0.0219342	0.0618146	0.7667	0.242273	0.760718	0.725823	0.560319	0.254237	0.931206		H	CAC	0.00598205	0.000997009	0.518445	0.471585	0.56331	0.552343	0.178465	0.287139	0.916251
H	CAT	0.49651	0.0967099	0.879362	0.477567	0.823529	0.135593	0.865404	0.927218	0.840479	0.404786		H	CAT	0.204387	0.713858	0.326022	0.301097	0.422732	0.514457	0.443669	0.378863	0.854437	0.268195		H	CAT	0.562313	0.750748	0.495513	0.529412	0.836491	0.850449	0.762712	0.758724	0.422732	0.92323		H	CAT	0	0.0189432	0.371884	0.180459	0.812562	0.957129	0.733799	0.504487	0.738784
Q	CAA	0.564307	0.527418	0.42672	0.461615	0.656032	0.222333	0.973081	0.817547	0.839482	1		Q	CAA	0.360917	0.295115	0.345962	0.373878	0.151545	0.716849	0.0987039	0.174477	0.44666	0.818544		Q	CAA	0.00398804	0.0827517	0.00199402	0.140578	0.407777	0.734796	0.284148	0.350947	0.575274	0.187438		Q	CAA	0.00498504	0.0608175	0.13659	0.0199402	0.180459	0.676969	0.483549	0.397807	0.245264
Q	CAG	0.988036	0.245264	0.105683	0.0368893	0.293121	0.493519	0.632104	0.841476	0.0319043	0.768694		Q	CAG	0.207378	0.92323	0.115653	0.528415	0.614158	0.570289	0	0.0249252	0.415753	0.569292		Q	CAG	0.154536	0.678963	0.0518445	0.00199402	0.600199	0.237288	0.0139581	0.29013	0.0378863	0.548355		Q	CAG	0	0.00498504	0.342971	0.742772	0.745763	0.219342	0.130608	0.547358	0.268195
R	CGC	0.7667	0.880359	0.119641	0.854437	0.999003	0.616152	0.0917248	0.256231	0.999003	0.307079		R	CGC	0.995015	0.312064	0.0378863	0.967099	0.132602	0.0757727	0.22333	0.596211	0.935194	1		R	CGC	0.0997009	0.346959	0.0348953	0.00398804	0.00598205	0.0438684	0.80658	0.500499	0.902293	0.581256		R	CGC	0.105683	0.00897308	0.0319043	0.460618	0.145563	0.793619	0.228315	0.452642	0.371884
R	CGT	0.993021	0.953141	0.953141	0.737787	0.999003	0.626122	0.648056	0.368893	0.931206	0.348953		R	CGT	0.906281	0.752742	0.0877368	0.954138	0.690927	0.393819	0.635095	0.435693	0.992024	0.956132		R	CGT	0.862413	0.987039	0.485543	0.537388	0.945165	0.0887338	0.899302	0.372881	0.59322	0.976072		R	CGT	0	0.417747	0.684945	0.77667	0.338983	0.622134	0.0528415	0.43669	0.515454
R	CGA	0.264207	0.374875	0.975075	0.206381	0.614158	0.214357	0.209372	0.192423	0.295115	0.00199402		R	CGA	0.56331	0.1665	0.112662	0.151545	0.789631	0.0548355	0.0348953	0.842473	0.0827517	0.880359		R	CGA	0.947159	0.934197	0.36989	0.808574	0.977069	0.859422	0.855434	0.0139581	0.731805	0.925224		R	CGA	0.673978	0.897308	0.959123	0.998006	0.189432	0.757727	0.857428	0.366899	0.996012
R	CGG	0.0109671	0.48654	0.00498504	0.48654	0.131605	0.745763	0.190429	0.487537	0.178465	0.988036		R	CGG	0.107677	0.000997009	0.0199402	0.0937188	0.0428714	0	0.0229312	0.00398804	0.520439	0.391825		R	CGG	0	0.0578265	0.138584	0.0139581	0.0538385	0.0897308	0.0269192	0	0.365902	0.00897308		R	CGG	0.998006	0.464606	0.000997009	0.0319043	0.00697906	0.0189432	0.494516	0	0.0618146
S	TCC	0.81655	0.764706	0.785643	0.118644	0.808574	0.581256	0.839482	0.999003	0.0368893	0.835494		S	TCC	0.887338	0.0269192	0.749751	0.876371	0.643071	0.448654	0.992024	0.998006	0.764706	0.167498		S	TCC	0.6999	0.192423	0.687936	0.501496	0.195414	0.0139581	0.343968	0.861416	0.575274	0.890329		S	TCC	1	0.111665	0.949153	0.684945	0.627119	0.741775	0.0169492	0.445663	0.190429
S	TCT	0.954138	0.956132	0.884347	0.231306	0.516451	0.433699	0.296112	0.704885	0.97009	0.0997009		S	TCT	0.694915	0.812562	0.99003	0.319043	0.439681	0.423729	0.148554	0.936191	0.181456	0.594217		S	TCT	0.0777667	0.646062	0.494516	0.12662	0.0797607	0.1665	0.388833	0.0269192	0.117647	0.224327		S	TCT	0.0488534	0.207378	0.894317	0.70987	0.915254	0.41675	0.0717846	0.549352	0.332004
S	TCA	0.915254	0.616152	0.671984	0.79661	0.89332	0.468594	0.638086	0.363908	0.0338983	0.153539		S	TCA	0.754736	0.100698	0.152542	0.657029	0.681954	0.581256	0.951147	0.118644	0.410768	0.925224		S	TCA	0.989033	0.818544	0.946162	0.394816	0.850449	0.735793	0.170489	0.930209	0.577268	0.409771		S	TCA	0	0.177468	0.842473	0.151545	0.795613	0.526421	0.401795	0.472582	0.661017
S	TCG	0.374875	0.108674	0.0169492	0.958126	0.949153	0.0797607	0.51346	0.6999	0.132602	0.739781		S	TCG	0.224327	0.901296	0.835494	0.558325	0.879362	0.208375	0.0109671	0.747757	0.0777667	0.949153		S	TCG	0.981057	0.43669	0.80658	0.940179	0.50349	0.645065	0.000997009	0.347956	0.125623	0.15653		S	TCG	0.000997009	0.0169492	0.999003	0.347956	0.423729	0.327019	0.395813	0.742772	0.134596
F	TTC	1	0.987039	0.870389	0.992024	0.653041	0.540379	0.874377	0.985045	0.322034	0.683948		F	TTC	1	0.488534	0.4666	0.814556	0.82652	0.33001	0.1665	0.39681	0.489531	0.448654		F	TTC	0.288136	0.0179462	0.810568	0.822532	0.581256	0.2333	0.472582	0.516451	0.981057	0.430708		F	TTC	0.999003	0.00498504	0.4666	0.628116	0.0638086	0.483549	0.452642	0.149551	0.205384
F	TTT	1	0.518445	0.764706	0.460618	0.417747	0.965105	0.391825	0.604187	0.120638	0.215354		F	TTT	1	0.0189432	0.169492	0.315055	0.820538	0.0508475	0.0468594	0.567298	0.56331	0.1665		F	TTT	0	0.0598205	0.882353	0.814556	0.880359	0.150548	0.551346	0.711864	0.985045	0.861416		F	TTT	0.0219342	0.0528415	0.929212	0.210369	0.595214	0.0847458	0.63011	0.285145	0.926221
L	TTA	1	0.140578	0.208375	0.784646	0.998006	0.508475	0.332004	0.654038	0.438684	0.992024		L	TTA	1	0.0169492	0.624128	0	0.247258	0.249252	0.925224	0.222333	0.399801	0.0149551		L	TTA	0.248255	0.0169492	0.471585	0.287139	0.114656	0.866401	0.530409	0.802592	0.186441	0.564307		L	TTA	0.121635	0.210369	0.964108	0.957129	0.978066	0.977069	0.431705	0.678963	0.538385
L	TTG	1	0.0418744	0.914257	0.0787637	0.758724	0.0767697	0.111665	0.390828	0.578265	0.957129		L	TTG	1	0.00199402	0.622134	0.769691	0.386839	0.127617	0.241276	0.381854	0.587238	0.00797607		L	TTG	0.0787637	0.00398804	0.465603	0.200399	0.0518445	0.465603	0.424726	0.215354	0.0418744	0.363908		L	TTG	0.629113	0.268195	0.319043	0.82652	0.292124	0.597208	0.616152	0.388833	0.204387
Y	TAC	0.334995	0.0229312	0.944167	0.465603	0.198405	0.841476	0.441675	0.0638086	0.628116	0.435693		Y	TAC	0.421735	0.68993	0.66002	0.452642	0.159521	0.364905	0.777667	0.25324	0.267198	0.899302		Y	TAC	0.184447	0.556331	0.906281	0.530409	0.654038	0.665005	0.305085	0.902293	0.0189432	0.0428714		Y	TAC	0.938185	0	0.230309	0.499501	0.0907278	0.191426	0.490528	0.807577	0.52343
Y	TAT	0.347956	0.60319	0.419741	0.64008	0.542373	0.245264	0.281157	0.682951	0.594217	0.342971		Y	TAT	0.0847458	0.0299103	0.209372	0.609172	0.962114	0.839482	0.494516	0.368893	0.595214	0.0957129		Y	TAT	0.0169492	0.680957	0.142572	0.0987039	0.0677966	0.978066	0.695912	0.0508475	0.201396	0.987039		Y	TAT	0.655035	0.000997009	0.371884	0.454636	0.928215	0.0309073	0.45663	0.94317	0.194417
*	TAA	0.000997009	0.00199402	0.0927218	0.000997009	0	0.000997009	0.0408774	0.108674	0.0877368	0.0697906		*	TAA	0.0468594	0.000997009	0.0448654	0.0438684	0.00199402	0	0.00398804	0.0338983	0.114656	0.0628116		*	TAA	0.984048	0.0229312	0.0159521	0.00697906	0.0807577	0.00997009	0.000997009	0.00498504	0.0508475	0.0937188		*	TAA	1	1	1	1	1	1	0.996012	1	1
*	TAG	0	0.000997009	0.0219342	0.00199402	0	0	0.0109671	0.0438684	0.0149551	0.0209372		*	TAG	0.0787637	0	0.00398804	0.0378863	0.00199402	0	0	0.00398804	0.0378863	0.00897308		*	TAG	0.981057	0.0159521	0.00299103	0.00797607	0.0378863	0.00199402	0	0	0.00697906	0.0309073		*	TAG	1	1	1	1	1	1	1	1	1
C	TGC	0.62014	0.973081	0.0219342	0.948156	0.765703	0.673978	0.420738	0.8335	0.934197	0.162512		C	TGC	0.968096	0.113659	0.672981	0.217348	0.5334	0.268195	0.20339	0.813559	0.517448	0.50349		C	TGC	0.509472	0.55334	0.467597	0.81655	0.107677	0.295115	0.468594	0.0149551	0.564307	0.739781		C	TGC	0	0.000997009	0.566301	0.445663	0.995015	0.180459	0.404786	0.588235	0.935194
C	TGT	1	0.773679	0.190429	0.634098	0.922233	0.47657	0.929212	0.43669	0.378863	0.852443		C	TGT	0.501496	0.944167	0.668993	0.544367	0.164506	0.0717846	0.634098	0.397807	0.178465	0.257228		C	TGT	0.830508	0.199402	0.793619	0.691924	0.137587	0.171486	0.872383	0.0169492	0.805583	0.751745		C	TGT	0.0867398	0.251246	0.99003	0.750748	0.289133	0.474576	0.95015	0.461615	0.217348
*	TGA	0.00199402	0.00897308	0.0528415	0	0	0	0.00299103	0.0528415	0.0289133	0.0209372		*	TGA	0.0139581	0	0.0139581	0.0179462	0	0	0.00199402	0.00498504	0.0578265	0.0199402		*	TGA	0.995015	0.0388833	0.00598205	0.00299103	0.0239282	0.00199402	0	0.000997009	0.00997009	0.0428714		*	TGA	1	1	1	1	1	1	1	1	1
W	TGG	0.185444	0.494516	0.0598205	0.477567	0.162512	0.00697906	0.169492	0.407777	0.326022	0.674975		W	TGG	0.101695	0.86341	0.834497	0.0997009	0.724826	0.119641	0.207378	0.0568295	0.658026	0.119641		W	TGG	0.879362	0.143569	0.437687	0.953141	0.0408774	0.0548355	0.372881	0.00398804	0.170489	0.866401		W	TGG	0.835494	0	0.0259222	0	0.212363	0	0.00897308	0	0
T	ACC	0.537388	0.750748	0.878365	0.998006	0.753739	0.882353	0.991027	0.999003	0.204387	0.102692		T	ACC	0.858425	0.991027	0.102692	0.347956	0.516451	0.232303	0.363908	0.677966	0.882353	0.881356		T	ACC	0	0.0628116	0.651047	0.0877368	0.409771	0	0.834497	0.0149551	0.510469	0.0727817		T	ACC	0.0119641	0	0.559322	0.309073	0.158524	0.534397	0.29013	0.849452	0.625125
T	ACT	0.722832	0.420738	0.831505	0.907278	0.0368893	0.25324	0.997009	0.332004	0.516451	0.531406		T	ACT	0.67996	0.7667	0.20339	0.652044	0.941176	0.461615	0.550349	0.395813	0.722832	0.134596		T	ACT	0.797607	0.680957	0.0159521	0.637089	0.63011	0.381854	0.720837	0.291127	0.595214	0.17348		T	ACT	0.00199402	0.225324	0.00199402	0.0857428	0.178465	0.547358	0.611167	0.502493	0.40678
T	ACA	0.402792	0.160518	0.235294	0.81655	0.275174	0.984048	0.974078	0.500499	0.321037	0.340977		T	ACA	0.169492	0.763709	0.218345	0.908275	0.844467	0.712861	0.586241	0.140578	0.0977069	0.945165		T	ACA	0.993021	0.134596	0.375872	0.477567	0.845464	0.846461	0.0598205	0.276171	0.108674	0.329013		T	ACA	0.000997009	0	0.29013	0.315055	0.236291	0.284148	0.991027	0.868395	0.727817
T	ACG	0.0658026	0.0787637	0.108674	0.363908	0.737787	0.209372	0.0408774	0.666002	0.287139	0.407777		T	ACG	0.440678	0.129611	0.304088	0.813559	0.128614	0.0957129	0.237288	0.453639	0.851446	0.241276		T	ACG	0.232303	0.169492	0.255234	0.0977069	0.337986	0.201396	0.00598205	0.401795	0.58325	0.0618146		T	ACG	0	0.0907278	0.226321	0.0219342	0.594217	0.114656	0.430708	0.264207	0.292124
I	ATC	0.685942	0.607178	0.775673	0.664008	0.802592	0.963111	0.40678	0.888335	0.180459	0.977069		I	ATC	0.444666	0.124626	0.43669	0.12662	0.473579	0.652044	0.204387	0.212363	0.498504	0.703888		I	ATC	0.0917248	0.370887	0.190429	0.0299103	0.661017	0.0997009	0.857428	0.512463	0.231306	0.348953		I	ATC	0.00498504	0.0129611	0.0578265	0.658026	0.3001	0.264207	0.404786	0.124626	0.0518445
I	ATT	0.701894	0.52343	0.696909	0.452642	0.209372	0.758724	0.577268	0.900299	0.973081	0.376869		I	ATT	0.803589	0.935194	0.847458	0.393819	0.717846	0.49651	0.865404	0.00498504	0.0259222	0.262213		I	ATT	0.411765	0.690927	0.336989	0.422732	0.45663	0.748754	0.100698	0.111665	0.762712	0.915254		I	ATT	0.0717846	0.299103	0.242273	0.0368893	0.292124	0.602193	0.0488534	0.187438	0.118644
I	ATA	0.238285	0.303091	0.922233	0.485543	0.0757727	0.0807577	0.685942	0.479561	0.0867398	0.459621		I	ATA	0.0508475	0.346959	0.918245	0.958126	0.433699	0.764706	0.303091	0.493519	0.0917248	0.527418		I	ATA	0.484546	0.0887338	0.114656	0.621137	0.614158	0.316052	0.0957129	0.874377	0.0468594	0.266201		I	ATA	0.0697906	0.267198	0.686939	0.0478564	0.65005	0.854437	0.378863	0.769691	0.532403
M	ATG	0.115653	0.474576	0.251246	0.481555	0.623131	0.174477	0.95015	0.0987039	0.680957	0.97009		M	ATG	0.0119641	0.159521	0.605184	0.17348	0.705882	0.152542	0.417747	0.0368893	0.216351	0.779661		M	ATG	0	0.000997009	0.0299103	0.0109671	0.00199402	0.337986	0.000997009	0.0289133	0.0249252	0.0967099		M	ATG	1	0.879362	0.199402	0.0129611	0.0707876	0.0618146	0.634098	0.626122	0.113659
N	AAC	0.508475	0.0179462	0.892323	0.174477	0.969093	0.759721	0.0338983	0.972084	0.706879	0.277168		N	AAC	0.226321	0.405783	0.734796	0.33001	0.696909	0.700897	0.789631	0.546361	0.0378863	0.430708		N	AAC	0.564307	0.62014	0.885344	0.157527	0.90329	0.279163	0.276171	0.129611	0.874377	0.891326		N	AAC	0	0.00299103	0.00199402	0.450648	0.0289133	0.698903	0.501496	0.641077	0.170489
N	AAT	0.487537	0.812562	0.92323	0.488534	0.874377	0.374875	0.632104	0.698903	0.991027	0.982054		N	AAT	0.373878	0.259222	0.36989	0.890329	0.0887338	0.295115	0.148554	0.0757727	0.557328	0.594217		N	AAT	0.619143	0.849452	0.694915	0.56331	0.519442	0.638086	0.109671	0.195414	0.3001	0.665005		N	AAT	0	0.00897308	0	0.102692	0.512463	0.112662	0.73679	0.849452	0.348953
K	AAA	0.196411	0.822532	0.803589	0.55334	0.789631	0.966102	0.248255	0.307079	0.149551	0.455633		K	AAA	0.353938	0.329013	0.256231	0.0697906	0.918245	0.810568	0	0.0787637	0.831505	0.0857428		K	AAA	0.938185	0.0628116	0.854437	0.748754	0.716849	0.500499	0.0677966	0.611167	0.388833	0.274177		K	AAA	0	0.0139581	0.790628	0.343968	0.0329013	0.651047	0.896311	0.33001	0.802592
K	AAG	0.614158	0.566301	0.577268	0.361914	0.723829	0.916251	0.723829	0.291127	0.938185	0.870389		K	AAG	0.753739	0.113659	0.383848	0.510469	0.214357	0.198405	0.240279	0.614158	0.659023	0.0348953		K	AAG	0.607178	0.561316	0.0338983	0.628116	0.865404	0.520439	0.187438	0.0239282	0.169492	0.673978		K	AAG	0	0.0518445	0.00199402	0.177468	0.25324	0.147557	0.830508	0.152542	0.0817547
S	AGC	0.265204	0.9332	0.915254	0.440678	0.208375	0.944167	0.937188	0.801595	0.461615	0.22333		S	AGC	0.784646	0.696909	0.464606	0.531406	0.965105	0.82652	0.37986	0.0538385	0.477567	0.289133		S	AGC	0.780658	0.383848	0.0907278	0.958126	0.722832	0.848455	0.518445	0.682951	0.254237	0.856431		S	AGC	0	1	0.0418744	0.381854	0.657029	0.648056	0.26321	0.218345	0.167498
S	AGT	0.586241	0.115653	0.773679	0.252243	0.505484	0.348953	0.654038	0.0638086	0.411765	0.690927		S	AGT	0.764706	0.87338	0.110668	0.33998	0.886341	0.284148	0.358923	0.764706	0.135593	0.448654		S	AGT	0.986042	0.75673	0.589232	0.998006	0.353938	0.51346	0.167498	0.735793	0.00299103	0.382851		S	AGT	0	0.998006	0.502493	0.272183	0.00797607	0.424726	0.362911	0.854437	0.0508475
R	AGA	0.0448654	0.0827517	0.952144	0.270189	0.124626	0.403789	0.248255	0.488534	0.592223	0.40678		R	AGA	0.163509	0.185444	0.331007	0.294118	0.52343	0.180459	0.272183	0.0717846	0.0239282	0.632104		R	AGA	0.641077	0.418744	0.715852	0.4666	0.346959	0.942173	0.63011	0.160518	0.841476	0.968096		R	AGA	0.00398804	0.540379	0.641077	0.00199402	0.0468594	0.531406	0.815553	0.985045	0.978066
R	AGG	0.00398804	0.337986	0.0677966	0.9332	0.226321	0.897308	0.639083	0.760718	0.812562	0.383848		R	AGG	0.458624	0.172483	0.0119641	0.0638086	0.12662	0.198405	0	0.241276	0.862413	0.559322		R	AGG	0.0378863	0.422732	0.0398804	0.17348	0.428714	0.469591	0.00697906	0.0707876	0.49651	0.0338983		R	AGG	0.490528	0.45663	0.00997009	0.0697906	0.0777667	0.0638086	0.0358923	0.314058	0.0408774
A	GCC	0.554337	0.784646	0.672981	0.45663	0.753739	0.984048	0.837488	0.704885	0.81655	0.798604		A	GCC	0.817547	0.353938	0.926221	0.857428	0.724826	0.695912	0.84347	0.985045	0.434696	0.506481		A	GCC	0.445663	0.433699	0.135593	0.470588	0.994018	0.389831	0.11665	0.55334	0.388833	0.143569		A	GCC	1	0	0.958126	0.134596	0.0199402	0.238285	0.15653	0.0618146	0.0199402
A	GCT	0.550349	0.161515	1	0.531406	0.989033	0.989033	0.332004	0.113659	0.133599	0.390828		A	GCT	0.287139	1	0.966102	0.891326	0.302094	0.89332	0.509472	0.887338	0.68993	0.847458		A	GCT	0.859422	0.580259	0.450648	0.720837	0.966102	0.414756	0.224327	0.0179462	0.237288	0.846461		A	GCT	0.0269192	0.101695	0.0458624	0.12662	0.133599	0.269192	0.0648056	0.00598205	0.0757727
A	GCA	0.824526	0.458624	0.944167	0.761715	0.878365	0.17348	0.0558325	0.763709	0.0448654	0.628116		A	GCA	0.856431	0.462612	0.239282	0.367896	0.205384	0.772682	0.234297	0.0259222	0.176471	0.969093		A	GCA	0.881356	0.363908	0.692921	0.250249	0.245264	0.646062	0.303091	0.74676	0.451645	0.760718		A	GCA	0	0.0179462	0.114656	0.00897308	0.284148	0.293121	0.000997009	0.123629	0.00199402
A	GCG	0.289133	0.904287	0.385842	0.133599	0.0598205	0.12662	0.552343	0.18345	0.358923	0.0927218		A	GCG	0.580259	0.834497	0.678963	0.966102	0.666999	0.606181	0.647059	0.128614	0.738784	0.627119		A	GCG	0.732802	0.975075	0.176471	0.00199402	0.344965	0.411765	0.631107	0.453639	0.773679	0.40678		A	GCG	0.0199402	0	0.140578	0.00199402	0.0269192	0.214357	0.00598205	0.00199402	0
V	GTC	0.827517	0.762712	0.189432	0.992024	0.491525	0.607178	0.981057	0.0508475	0.973081	0.783649		V	GTC	0.977069	0.956132	0.192423	0.822532	0.645065	0.924227	0.265204	0.281157	0.487537	0.440678		V	GTC	0.604187	0.664008	0.394816	0.322034	0.918245	0.413759	0.910269	0.0468594	0.874377	0.128614		V	GTC	0.145563	0.144566	0.0638086	0.412762	0.530409	0.175474	0.384845	0.0817547	0.0468594
V	GTT	0.00797607	0.441675	0.992024	0.0199402	0.968096	0.900299	0.124626	0.789631	0.835494	0.24327		V	GTT	0.658026	0.638086	0.896311	0.580259	0.609172	0.462612	0.371884	0.718843	0.942173	0.995015		V	GTT	0.875374	0.685942	0.445663	0.28016	0.189432	0.132602	0.184447	0.0707876	0.00897308	0.998006		V	GTT	0.700897	0.120638	0.251246	0.260219	0.455633	0.697906	0.694915	0.219342	0.0189432
V	GTA	0.978066	0.73679	0.25324	0.105683	0.25324	0.837488	0.0388833	0.515454	0.57328	0.597208		V	GTA	0.755733	0.559322	0.647059	0.459621	0.579262	0.42672	0.0977069	0.0817547	0.352941	0.139581		V	GTA	0.864407	0.169492	0.659023	0.0189432	0.438684	0.276171	0.0269192	0.372881	0.275174	0.584247		V	GTA	0	0.00697906	0.767697	0.516451	0.718843	0.7667	0.376869	0.419741	0.483549
V	GTG	0.64008	0.332004	0.137587	0.957129	0.259222	0.419741	0.975075	0.0847458	0.828514	0.631107		V	GTG	0.205384	0.429711	0.587238	0.598205	0.244267	0.714855	0.00398804	0	0.720837	0.514457		V	GTG	0.332004	0.00398804	0.0299103	0.119641	0.196411	0.393819	0.00199402	0.000997009	0.188435	0		V	GTG	0.912263	0.0468594	0.0239282	0.20339	0.685942	0.00199402	0.0209372	0.0398804	0.0169492
D	GAC	0.706879	0.849452	0.18345	1	0.52343	0.958126	0.282154	0.0398804	0.331007	0.0458624		D	GAC	1	0.982054	0.999003	0.956132	0.98006	0.912263	0.82652	0.916251	0.294118	0.540379		D	GAC	0.867398	0.997009	0.734796	0.986042	0.764706	0.0987039	0.0438684	0.813559	0.393819	0.70987		D	GAC	0	0.956132	0.676969	0.509472	0.915254	0.862413	0.920239	0.521436	0.684945
D	GAT	0.966102	0.985045	0.983051	0.992024	0.316052	0.952144	0.40678	0.768694	0.331007	0.239282		D	GAT	0.956132	0.982054	0.567298	0.80658	0.58325	0.749751	0.956132	0.692921	0.487537	0.491525		D	GAT	0.999003	0.987039	0.981057	0.691924	0.663011	0.727817	0.629113	0.0368893	0.0368893	0.876371		D	GAT	0	0.815553	0.978066	0.0548355	0.167498	0.874377	0.966102	0.0807577	0.652044
E	GAA	0.956132	0.914257	0.814556	0.937188	0.324028	0.742772	0.210369	0.696909	0.643071	0.604187		E	GAA	0.968096	0.886341	0.691924	0.344965	0.982054	0.982054	0.234297	0.432702	0.538385	0.606181		E	GAA	0.998006	1	0.859422	0.45663	0.954138	0.454636	0.303091	0.297109	0.202393	0.423729		E	GAA	0	0.997009	0.692921	0.372881	0.651047	0.0887338	0.000997009	0.762712	0.208375
E	GAG	0.899302	0.984048	0.72682	0.365902	0.789631	0.979063	0.840479	0.898305	0.430708	0.312064		E	GAG	0.292124	0.697906	0.918245	0.302094	0.48654	0.313061	0.468594	0.742772	0.859422	0.108674		E	GAG	0.994018	0.997009	0.629113	0.930209	0.666999	0.0458624	0.123629	0.325025	0.0817547	0.147557		E	GAG	0	0.326022	0.942173	0.341974	0.751745	0.0329013	0.0877368	0.000997009	0.862413
G	GGC	0.1665	0.741775	0.0737787	0.373878	0.164506	0.00598205	0.351944	0.0199402	0.0149551	0.0388833		G	GGC	0.197408	0.0687936	0.0737787	0.444666	0.39681	0.56331	0.577268	0.188435	0.00697906	0.0169492		G	GGC	0.754736	0.480558	0.315055	0.96012	0.32004	0.480558	0.797607	0.415753	0.00697906	0.440678		G	GGC	0.774676	0.408774	0	0.00398804	0.0109671	0.235294	0.35992	0.0199402	0.0159521
G	GGT	0.164506	0.227318	0.447657	0.898305	0.407777	0.240279	0.0777667	0.251246	0.231306	0.0488534		G	GGT	0.00199402	0.972084	0.408774	0.694915	0.0847458	0.792622	0.712861	0.0737787	0.0199402	0.0638086		G	GGT	0.900299	0.994018	0.740778	0.981057	0.0219342	0.570289	0.169492	0.717846	0.258225	0.84347		G	GGT	0.322034	0.3001	0.834497	0.0907278	0.10668	0.744766	0.0857428	0.296112	0.717846
G	GGA	0.0707876	0.98006	0.661017	0.44666	0.830508	0.0159521	0.0717846	0.229312	0.750748	0.269192		G	GGA	0.0279163	0.979063	0.940179	0.599202	0.314058	0.918245	0.82652	0.0777667	0.0269192	0.0309073		G	GGA	0.99003	0.995015	1	0.314058	0.367896	0.855434	0.920239	0.785643	0.75673	0.214357		G	GGA	0.390828	0.305085	0.424726	0.70987	0.0618146	0.0338983	0.0967099	0.343968	0.662014
G	GGG	0	0.00398804	0.119641	0	0.0119641	0.266201	0.384845	0	0.0299103	0.0428714		G	GGG	0	0.364905	0.112662	0.0987039	0.00897308	0.00897308	0.0418744	0.484546	0.0488534	0.0149551		G	GGG	0.293121	0.0159521	0.0628116	0.000997009	0.67996	0.333001	0.0119641	0.48654	0.00498504	0.00697906		G	GGG	1	0.260219	0.0329013	0.338983	0.0538385	0.129611	0.743769	0	0
[truncated: 12 more columns]

## Sheet: Heatmap for codons in sites
Stop efficiency at the corresponging triplet while located in the ribosome sites								P-values for shuffled datasets exceeding experimental data of stop efficiency at the corresponging triplet while located in the ribosome sites
		Ribosome sites								Ribosome sites
		-2	E	P	A	2				-2	E	P	A	2
P	CCC	-0.0151591	-0.0192336	-0.0218853	0.00543936	0.00349605		P	CCC	0.754736	1	1	1	1
P	CCT	-0.0142797	-0.0212652	-0.0178125	0.00824219	0.0152607		P	CCT	0.382851	1	1	1	1
P	CCA	-0.0126002	-0.0204348	-0.0197743	0.0159982	0.0218599		P	CCA	0.0169492	1	1	0.14656	0.221336
P	CCG	-0.0140541	-0.0200464	-0.0180348	0.0132877	0.016765		P	CCG	0.186441	1	1	1	1
L	CTC	-0.0153919	-0.0126727	-0.0111506	0.0040078	0.00930541		L	CTC	0.78664	0.0249252	0.121635	1	0.997009
L	CTT	-0.0157328	-0.0135595	-0.0133789	0.00655895	0.0167893		L	CTT	0.839482	0.26321	0.866401	1	0.897308
L	CTA	-0.017234	-0.0078872	-0.00983393	0.00110025	0.0205382		L	CTA	0.92323	0.000997009	0.256231	1	0.161515
L	CTG	-0.0145499	-0.0125321	-0.00782456	0.0136298	0.0235474		L	CTG	0.502493	0.0338983	0.00299103	0.605184	0.151545
H	CAC	-0.0131858	-0.0136881	-0.00978117	0.0140714	0.0193056		H	CAC	0.0827517	0.165503	0.00598205	0.0129611	0.000997009
H	CAT	-0.0153757	-0.0142717	-0.014948	0.0177478	0.0423367		H	CAT	0.784646	0.331007	0.953141	0.00199402	0.00299103
Q	CAA	-0.0175567	-0.0133986	-0.00681331	0.023496	0.0449815		Q	CAA	0.926221	0.121635	0.00199402	0.00199402	0
Q	CAG	-0.0135171	-0.0137001	-0.00888417	0.0149224	0.0281815		Q	CAG	0.250249	0.131605	0	0	0
R	CGC	-0.0158213	-0.0159296	-0.00937276	0.0173151	0.0111226		R	CGC	0.932203	0.925224	0.000997009	0.00697906	1
R	CGT	-0.0188933	-0.0174065	-0.0142063	0.0226475	0.0262734		R	CGT	0.998006	0.98006	0.985045	0.00697906	0.0329013
R	CGA	-0.0132418	-0.013098	-0.0164872	0.00902735	0.0206181		R	CGA	0.101695	0.0717846	0.999003	0.996012	0.00299103
R	CGG	-0.0129855	-0.0101608	-0.00614746	0.0185131	0.0231202		R	CGG	0.0219342	0	0	0.0269192	0.0648056
S	TCC	-0.0163666	-0.0166684	-0.0118684	0.00801407	0.00605791		S	TCC	0.975075	0.966102	0.346959	1	0.999003
S	TCT	-0.0172467	-0.0160642	-0.00640168	0.0252763	0.0248729		S	TCT	0.958126	0.841476	0.00498504	0.133599	0.0727817
S	TCA	-0.016314	-0.0149946	-0.0152839	0.0274373	0.0218401		S	TCA	0.802592	0.566301	0.996012	0.0199402	0.241276
S	TCG	-0.0140466	-0.0156798	-0.0129358	0.0179424	0.0162911		S	TCG	0.27318	0.753739	0.743769	0.0129611	0.219342
F	TTC	-0.0201306	-0.0148335	-0.0123116	0.0115897	0.0104089		F	TTC	1	0.802592	0.569292	0.612164	0.922233
F	TTT	-0.0147792	-0.00971108	-0.00791806	0.0541174	0.0403182		F	TTT	0.999003	0.102692	0.0239282	0.0269192	0.386839
L	TTA	-0.0170309	-0.00639519	-0.0034899	0.050568	0.032157		L	TTA	1	0.000997009	0.0927218	0.758724	0.643071
L	TTG	-0.0109617	-0.0109137	-0.00797825	0.0221239	0.0315363		L	TTG	0.19342	0.0478564	0	0.375872	0.656032
Y	TAC	-0.0129018	-0.0145259	-0.0121928	0.0108217	0.0198003		Y	TAC	0.247258	0.452642	0.387836	0.0418744	0.387836
Y	TAT	-0.0140091	-0.0117121	-0.00687252	0.0363115	0.070461		Y	TAT	0.461615	0.107677	0.151545	0.0847458	0.659023
*	TAA	0	0	0	-0.0843519	0.0680374		*	TAA	0	0	0.000997009	1	0
*	TAG	0	0	0	-0.0651965	0.0310631		*	TAG	0	0	0	1	0.936191
C	TGC	-0.0160479	-0.0147726	-0.0118307	0.0135982	0.012647		C	TGC	0.907278	0.538385	0.292124	0.0109671	0.0787637
C	TGT	-0.0144364	-0.0132866	-0.00942282	0.0369105	0.0299255		C	TGT	0.99003	0.391825	0.628116	0.372881	0.0289133
*	TGA	0	0	0	-0.0414311	0.0151164		*	TGA	0	0	0	1	0.995015
W	TGG	-0.0114507	-0.013692	-0.0100423	0.0315772	0.0256227		W	TGG	0.0229312	0.170489	0.196411	0	0.0498504
T	ACC	-0.0182711	-0.0161577	-0.00872962	0.00862019	0.012519		T	ACC	1	0.839482	0	0.0139581	0.0179462
T	ACT	-0.016507	-0.0158768	-0.0108687	0.0282638	0.0216184		T	ACT	0.881356	0.779661	0.437687	0	0.0229312
T	ACA	-0.0156215	-0.0160288	-0.0120741	0.0337997	0.0280722		T	ACA	0.634098	0.716849	0.760718	0	0.0129611
T	ACG	-0.0118173	-0.0137512	-0.00912263	0.0170437	0.019941		T	ACG	0.0109671	0.133599	0.00199402	0	0
I	ATC	-0.0175265	-0.0128102	-0.00875116	0.0197713	0.0148146		I	ATC	0.965105	0.120638	0.0209372	0	0.0119641
I	ATT	-0.0173728	-0.0151785	-0.00720878	0.0578462	0.0426133		I	ATT	0.861416	0.722832	0.521436	0.000997009	0.0388833
I	ATA	-0.0138178	-0.0134478	-0.00294906	0.0662458	0.0414827		I	ATA	0.177468	0.368893	0.111665	0.0717846	0.0408774
M	ATG	-0.0142916	-0.0113374	0.00990756	0.0174812	0.0298133		M	ATG	0.386839	0.0209372	0	0.917248	0.00697906
N	AAC	-0.0149488	-0.0149341	-0.0140707	0.0200729	0.0330316		N	AAC	0.522433	0.407777	0.769691	0	0
N	AAT	-0.0192081	-0.0125493	-0.0111003	0.0459945	0.0679446		N	AAT	0.983051	0.113659	0.747757	0	0
K	AAA	-0.0168978	-0.013404	-0.00987236	0.0563708	0.0736006		K	AAA	0.693918	0.130608	0.75673	0	0
K	AAG	-0.0165577	-0.0132451	-0.0108539	0.0251832	0.0354844		K	AAG	0.846461	0.114656	0.218345	0	0
S	AGC	-0.0164133	-0.0159446	-0.0149931	0.0108222	0.0154672		S	AGC	0.932203	0.769691	0.891326	0.00697906	0
S	AGT	-0.0139802	-0.0146595	-0.0129031	0.0468004	0.0241958		S	AGT	0.271186	0.586241	0.969093	0	0.0857428
R	AGA	-0.0127243	-0.0108628	-0.0119104	0.0440001	0.0254885		R	AGA	0.0578265	0.0199402	0.887338	0.00398804	0.0119641
R	AGG	-0.0140912	-0.0106063	-0.00720262	0.021268	0.0186788		R	AGG	0.257228	0	0	0	0.00398804
A	GCC	-0.0159652	-0.0165279	-0.0119688	0.0133641	0.0116807		A	GCC	0.976072	0.98006	0.333998	0.134596	0.655035
A	GCT	-0.0157023	-0.0183839	-0.0129037	0.0218593	0.0232981		A	GCT	0.847458	1	0.799601	0	0.0239282
A	GCA	-0.0156992	-0.0141882	-0.0126934	0.0275911	0.0255955		A	GCA	0.745763	0.22333	0.628116	0	0
A	GCG	-0.0132297	-0.0163697	-0.011407	0.0232539	0.0224468		A	GCG	0.0588235	0.939182	0.340977	0	0.109671
V	GTC	-0.0166065	-0.0162563	-0.0126188	0.01381	0.0163391		V	GTC	0.972084	0.902293	0.560319	0.0119641	0.14656
V	GTT	-0.0140052	-0.0180057	-0.00974737	0.0265633	0.0380258		V	GTT	0.36989	0.988036	0.401795	0.328016	0.0418744
V	GTA	-0.0151494	-0.0135701	-0.0083729	0.0292915	0.039346		V	GTA	0.490528	0.264207	0.12662	0.00598205	0
V	GTG	-0.0150943	-0.0129803	-0.00440701	0.0217716	0.0353907		V	GTG	0.666999	0.0797607	0	0.000997009	0.185444
D	GAC	-0.0158646	-0.0224084	-0.0155184	0.00620495	0.0207587		D	GAC	0.870389	1	0.961117	0.761715	0
D	GAT	-0.021341	-0.0196899	-0.0169963	0.0325101	0.0614533		D	GAT	1	0.995015	1	0	0
E	GAA	-0.0194519	-0.019274	-0.0168982	0.0306137	0.0496635		E	GAA	0.991027	0.99003	0.995015	0	0
E	GAG	-0.0182282	-0.0157586	-0.0145973	0.0158203	0.039282		E	GAG	0.993021	0.661017	0.879362	0.00299103	0
G	GGC	-0.0116735	-0.0121156	-0.0123721	0.0159704	0.0190613		G	GGC	0.000997009	0.000997009	0.492522	0.000997009	0
G	GGT	-0.0131151	-0.0125344	-0.0122709	0.0324281	0.0285841		G	GGT	0.0418744	0.0348953	0.957129	0.178465	0.00398804
G	GGA	-0.0140644	-0.0146032	-0.0168292	0.022607	0.0269092		G	GGA	0.228315	0.420738	1	0.0199402	0
G	GGG	-0.00872681	-0.0101393	-0.0066584	0.0194287	0.0261741		G	GGG	0	0	0	0.998006	0.418744

## Sheet: 2D codon heatmap
2-dimensional representation of stalling propensities with the corresponding codons located in the P- and A-sites
P\A		Codons located in the A-site
		CCC	CCT	CCA	CCG	CTC	CTT	CTA	CTG	CAC	CAT	CAA	CAG	CGC	CGT	CGA	CGG	TCC	TCT	TCA	TCG	TTC	TTT	TTA	TTG	TAC	TAT	TAA	TAG	TGC	TGT	TGA	TGG	ACC	ACT	ACA	ACG	ATC	ATT	ATA	ATG	AAC	AAT	AAA	AAG	AGC	AGT	AGA	AGG
P	CCC	-0.0364741	-0.0489292	-0.0378306	-0.0416307	-0.0159098	-0.0279823	-0.0490923	-0.0209091	-0.014496	-0.0248073	-0.0130523	-0.0177577	-0.0108996	-0.0197965	-0.0337502	-0.0149309	-0.0220232	-0.0110907	-0.0154262	-0.0124781	-0.0158488	0.00771179	-0.0271449	-0.0481769	-0.013014	-0.0203209	-0.129647	-0.0916392	-0.0239382	-0.0189974	-0.106857	-0.0155807	-0.0221093	-0.0241538	-0.0298931	-0.0189028	-0.0135873	-0.00222595	-0.00513224	-0.0101215	-0.0164173	-0.0320307	-0.00490433	-0.00961359	-0.0226955	-0.00230297	-0.00976469	-0.015428
P	CCT	-0.0324363	-0.0330335	-0.0282887	-0.0231274	0.000880597	-0.0247346	-0.0928352	-0.0143531	-0.0112576	0.0203086	0.0081229	-0.0222224	-0.0112692	-0.0128079	-0.0170554	-0.0161644	-0.026371	-0.0224789	0.00556754	-0.0210606	-0.0235421	-0.0286383	-0.00556211	0.00183341	-0.0272305	-0.0131326	-0.0665827	-0.128095	-0.027752	-0.0193583	-0.0739185	-0.0160156	-0.0167682	-0.0200553	-0.0147454	0.0119295	-0.0231106	-0.0166216	0.021078	-0.00455118	0.00258474	-0.0293048	-0.0364468	0.00500504	-0.0266286	-0.0395694	0.00619398	-0.0295107
P	CCA	-0.0480377	-0.042878	-0.0302522	-0.0450517	-0.00830567	-0.0309026	-0.0274484	-0.00268419	-0.0143941	-0.016133	-0.000236822	-0.0308603	-0.0179329	-0.0249587	-0.0172628	-0.0151295	-0.0171601	-0.00318361	-0.00860597	-0.00800612	0.00401947	-0.00513498	-0.0207432	-0.00438942	-0.00545854	-0.0138569	-0.119484	-0.0921409	-0.00363207	-0.0151615	-0.0848586	0.00266203	-0.0316938	-0.00280765	-0.0221305	-0.0219731	-0.0106848	-0.0256994	-0.00243214	-0.0109575	0.00493035	-0.0163449	-0.00525768	-0.0220833	-0.0164431	-0.0353718	-0.0164149	-0.0280536
P	CCG	-0.0335886	-0.0264897	-0.0388494	-0.042106	-0.0287592	-0.042344	-0.055328	-0.00786405	-0.034397	-0.0176773	-0.0100952	-0.0191483	-0.0148447	-0.00669932	-0.0242042	-0.016014	-0.0099984	-0.015912	-0.0128281	-0.024048	-0.00657737	-0.0162908	-0.0207178	-0.00653812	-0.0107248	-0.026028	-0.127344	-0.118868	-0.012706	-0.0166535	-0.0956941	-0.0147706	-0.013771	-0.0176539	0.00507289	-0.00816927	-0.0133981	-0.012508	-0.0254236	-0.00319503	-0.0135871	-0.025062	-0.0109194	-0.0314062	-0.00992774	-0.0176867	-0.0232664	-0.0257306
L	CTC	-0.0133397	-0.0175498	-0.0185335	-0.0118732	-0.00931467	-0.0158373	-0.0148149	-0.00279913	0.00413738	-0.0255852	0.0144986	-0.0226829	-0.0106928	-0.0109106	-0.00448463	-0.00437549	-0.0133524	-0.00692505	-0.026769	-0.00655201	-0.0178593	-0.0119601	-0.0285876	-0.0290394	0.000570444	-0.0224127	-0.0385807	-0.00996646	-0.0101219	-0.0199489	-0.0355728	0.00511105	-0.00519658	-0.00921408	-0.0108172	0.00329675	-0.0163153	-0.00864194	0.00550944	-0.0180199	-0.0180065	-0.000571419	-0.00722626	0.0419173	-0.00925779	-0.0298769	-0.0605719	0.000797029
L	CTT	-0.0233335	-0.0122241	-0.0229821	0.00447138	-0.0253919	-0.0464921	-0.0766126	-0.0272776	-0.00954584	-0.013914	0.000563215	-0.0188355	-0.0287125	-0.00699154	-0.0361892	-0.000298476	-0.0155289	0.00376722	-0.0389393	-0.0268377	-0.0132942	-0.0061376	-0.0164823	-0.00812673	-0.002327	0.00791436	-0.0735652	-0.106085	0.0205424	-0.048845	-0.0371311	-0.00742029	-0.0285098	-0.0212265	-0.0178465	-0.00702783	-0.0126688	0.0188921	0.0162111	-0.00243592	0.00884776	-0.013177	0.012379	-0.0138786	0.00905886	0.00491186	-0.0600014	-0.00219772
L	CTA	-0.0161745	-0.00498637	-0.00356452	-0.00416407	-0.0226916	-0.0280181	-0.0158079	-0.00593805	-0.0304235	-0.0230186	-0.021387	0.00567754	-0.0345905	0.00721691	-0.00920929	-0.0187553	-0.0164713	-0.00045298	-0.000392723	-0.0228534	-0.0258023	-0.00671368	0.0144062	-0.0262375	-0.00347532	0.0200306	-0.0865794	-0.0312618	-0.00918422	-0.000183389	-0.0666426	0.0188675	0.00852438	0.00649772	-0.0054273	-0.00818922	0.00395396	-0.0500397	-0.00610409	0.0108347	-0.00982298	0.0229834	0.0238647	0.065218	0.0014702	-0.0299057	-0.0297675	0.017941
L	CTG	-0.00898403	-0.0135044	-0.00127948	0.00393734	-0.00634409	-0.00857659	0.00858001	0.00594407	-0.00527052	-0.00889543	0.0105158	-0.00364003	-0.00610452	-0.00859332	-0.00885144	-0.0100306	-0.0147495	-0.0041764	-0.0166293	-0.0022623	-0.00723861	-0.0152165	-0.0202757	-0.0242849	-0.0346438	0.000760964	-0.0671275	-0.0870906	-0.0220687	-0.0360685	-0.0657098	-0.00604774	-0.0195382	-0.0151214	-0.010221	-0.00281823	-0.024452	0.0212715	-0.025849	-0.00474019	0.0119331	-0.0248405	0.00578913	0.0192375	-0.0124218	-0.0212858	-0.0402612	-0.0209594
H	CAC	-0.0119372	-0.014456	0.00976191	-0.0100611	-0.00974532	-0.0162596	0.0127631	-0.0302985	-0.0107291	-0.00198866	0.0119577	-0.00921056	-0.0108762	-0.0106101	-0.0172195	-0.0170177	-0.0045263	-0.0121008	-0.00930018	-0.0179192	-0.0135914	-0.0185971	-0.0236696	-0.0219927	-0.0133434	-0.00174802	-0.0391848	-0.0317899	0.00165806	-0.00350631	-0.0245165	0.0105784	-0.00844269	-0.0111453	0.00874208	-0.016293	-0.00942095	-0.00579718	-0.0178759	-0.0256229	0.00217652	-0.0331092	-0.00982831	0.0023762	-0.0158747	-0.0161963	-0.0134138	-0.010899
H	CAT	-0.0296014	-0.010419	-0.0119909	-0.0230388	-0.0145959	-0.0291679	-0.0336885	0.00556738	-0.00672157	0.0167583	-0.0103097	-0.0236931	-0.0196559	-0.0212123	-0.0217165	-0.00297082	-0.0125121	-0.0236036	-0.0201962	0.00408604	-0.0116838	-0.00200467	-0.0288978	-0.00546964	-0.0269178	-0.0364155	-0.0673965	-0.0597173	-0.0239266	0.00514051	-0.0682289	-0.0083795	-0.0111374	-0.0240026	0.00468827	-0.0281647	-0.0213938	-0.0009215	-0.0390868	-0.0276272	-0.00881507	0.00305159	-0.0051309	0.00911568	-0.00546612	-0.0710455	-0.0212715	0.0152291
Q	CAA	-0.00196476	0.00954668	-0.0134444	-0.013529	-0.0107134	-0.0310365	-0.0214262	-0.0145715	-0.00413184	0.0076923	-0.00470654	-0.0229161	-0.00809764	-0.0111727	-0.00901345	0.00581374	0.0152275	-0.00716883	-0.0142872	0.0164778	0.0141494	0.00164675	0.00824124	-0.0423816	-0.0203135	0.0433382	-0.0877507	-0.0317504	0.000734793	-0.0150866	-0.0776452	0.000805472	-0.00826258	-0.0109957	0.0109994	0.000637738	-0.0123125	0.0105962	-0.0129783	-0.00016896	0.0152551	0.0305319	0.0077546	0.00491803	-0.0229335	0.00533926	0.0294463	0.00339326
Q	CAG	-0.0150997	-0.0236147	0.00741987	-0.00643128	-0.011353	-0.016961	-0.0256544	-0.00495658	-0.00737003	-0.00285226	0.0118949	-0.0155748	0.00569317	-0.00304953	-0.038173	0.00019672	-0.00530595	-0.0178646	0.0222684	-0.0181204	-0.0288784	-0.0246623	-0.038271	-0.00728697	0.0100022	-0.0101592	-0.0603984	-0.062713	-0.0104014	-0.0152542	-0.071783	0.0150319	-0.004079	-0.020254	-0.00668961	-0.00777163	-0.0119292	-0.0229462	-0.00834214	-0.00875083	-0.0038962	0.0215156	0.0251435	-0.0130687	-0.0217316	0.00297482	0.047109	0.012893
R	CGC	-0.00914782	-0.0205445	-0.0171361	-0.0071166	-0.000464953	-0.00729741	-0.0394197	-0.014324	-0.0151336	-0.000612733	-0.00334263	-0.0148976	-0.0068637	-0.00764638	-0.0162997	-0.000704714	-0.00123766	-0.0161519	-0.0182623	0.00153621	0.00547173	-0.0125791	0.00611858	-0.0202077	-0.0130249	-0.0475585	-0.0202709	-0.0236017	-0.0137978	-0.035646	-0.0555643	0.0126916	-0.00758434	0.00144453	-0.00767759	-0.016491	-0.0110331	-0.0237351	-0.00423725	-0.00952055	-0.0113025	0.00905238	-0.0263993	0.00820991	-0.0158352	0.00355364	0.00702902	0.00214416
R	CGT	-0.0196179	0.00225859	-0.00192454	-0.0153175	-0.0142186	-0.0095919	-0.0224141	-0.0100009	-0.0175526	-0.0271281	0.0173504	-0.00106057	-0.00627178	-0.00873051	-0.0322571	-0.0125288	-0.028959	-0.0178002	-0.0186052	-0.016161	-0.0127594	-0.00521713	-0.0103577	-0.0385825	-0.0169751	0.000180555	-0.172777	-0.0485965	-0.00376232	-0.00560986	-0.0942643	-0.00256683	-0.0143704	-0.00583172	0.00978215	-0.0086186	-0.0073282	-0.000388779	-0.00668339	-0.0370575	-0.0101354	-0.0378315	0.00684062	-0.0278401	-0.0156473	0.0214529	-0.0216438	-0.0198334
R	CGA	-0.0173536	-0.0153883	-0.00532616	-0.0200475	-0.0329678	-0.0246376	-0.0833132	-0.0257714	-0.0112595	-0.0305853	-0.00862756	-0.0284796	-0.0123614	-0.0139619	-0.0259638	0.00856935	-0.00445139	-0.0265528	-0.031692	-0.0220684	0.0113082	-0.0238384	-0.0523639	-0.0189536	-0.00113262	-0.00181327	-0.0614684	-0.0456331	-0.00800798	-0.0204895	-0.0500259	-0.00214318	-0.0207255	-0.00496456	-0.0427299	-0.0146025	-0.00149489	-0.0448396	-0.00272327	0.0109918	-0.0174448	-0.0471472	-0.00797677	-0.0142095	-0.0157026	-0.0576273	0.0234206	0.0143194
R	CGG	-0.00426178	-0.00542787	-0.00557858	-0.00137154	-0.0149577	-0.0162675	-0.0205013	-0.00383177	-0.00739928	-0.00746275	-0.00578624	-0.00802115	-0.000384276	-0.00830153	-0.0137553	-0.00390911	-0.00922081	0.0117174	0.00806686	-0.00194088	-0.0107417	-0.0152633	-0.0346233	-0.00722153	-0.00772732	0.0163568	-0.114357	-0.0846924	-0.00866686	-0.00105106	-0.0899716	-0.00507905	-0.014293	-0.00709374	0.000951651	0.0147624	-0.0187712	-0.0058268	-0.00415725	-0.00675064	-0.0185795	-0.0474569	-0.0231904	0.0139633	-0.00959606	-0.0109491	-0.0293472	0.012776
S	TCC	-0.00518726	-0.0098197	0.00804515	-0.0131963	-0.00925279	0.0246199	-0.0310716	-0.0089172	-0.0133493	-0.00505015	-0.020571	0.00240292	-0.0150269	0.00432173	-0.0318301	-0.010098	-0.0124113	-0.00943319	-0.0217152	-0.0131693	-0.0221196	-0.00975704	-0.0268207	-0.0157509	0.00191311	-0.00560159	-0.0921833	-0.0754949	-0.00807278	-0.0361035	-0.0692054	0.00141604	-0.00940773	-0.0220283	-0.0157057	0.0118497	-0.00933864	-0.0373673	0.0130867	-0.0155578	-0.00857065	-0.00396988	-0.0251317	-0.0186541	-0.0207991	-0.0190846	-0.0219775	-0.0123266
S	TCT	-0.00777555	-0.0109543	-0.0172264	-0.0111443	-0.0219134	0.00198111	0.010731	-0.0123664	-0.00375911	-0.0127152	-0.00592358	0.00890634	-0.0122157	-0.00967469	0.0135691	0.000391884	-0.0127295	-0.0121808	-0.00813866	-0.00366739	-0.0186368	0.00457679	-0.0416229	0.0105279	0.00540468	0.0192878	-0.0604151	-0.0626068	-0.00557599	-0.00713622	-0.0520002	0.0212344	-0.027263	0.0178288	-0.000213287	0.0116036	-0.011303	0.00799174	-0.0242811	0.0214008	-0.00104772	-0.0208572	-0.00250693	-0.0156914	-0.0177297	-0.0135422	0.03724	0.00191209
S	TCA	-0.0170535	-0.0225978	0.0074889	-0.0258925	-0.00880486	-0.0307319	-0.0408136	-0.0191077	-0.0029324	-0.00368184	0.0163303	0.00342378	-0.0121141	-0.0271084	-0.0183218	0.000752528	-0.0212839	-0.0301063	-0.0280024	-0.0301306	-0.0205468	0.0226055	-0.00264325	-0.0128954	0.0215351	0.0180047	-0.250745	-0.116967	-0.0177318	0.0289687	-0.104004	0.028714	-0.0140663	-0.0057214	-0.00721601	-0.0392151	-0.00704077	-0.0273743	-0.00911372	-0.0126596	-0.0122704	0.0588309	-0.0102948	-0.00629721	-0.0339699	-0.0327173	-0.0366116	-0.023894
S	TCG	-0.0116943	-0.0181021	-0.0139186	-0.0156257	-0.0202699	-0.015783	-0.0482498	-0.019382	-0.0054661	0.000480134	-0.0345178	-0.0172816	-0.00691293	-0.0233002	-0.0174562	-0.0120234	-0.0282768	-0.0226791	0.00153595	-0.0119579	0.00390972	-0.015522	0.00440322	-0.0288729	-0.00418736	0.00105759	-0.221831	-0.0668293	-0.00654335	-0.0359585	-0.0895319	0.00972846	0.00144964	-0.0175738	-0.0260562	-0.00392507	-0.00179282	-0.0145185	-0.0336594	-0.0187139	0.00412103	-0.0430828	-0.0361081	-0.0156807	-0.0196269	-0.0196493	0.00101801	0.0224772
F	TTC	-0.0204344	0.0110139	0.0172586	-0.0409848	-0.028472	0.00895338	-0.0829871	-0.0505219	-0.0120841	-0.0180447	-0.00490836	-0.00479625	-0.00776765	0.0116709	-0.0395005	0.00182509	0.00173846	0.00232337	-0.0754863	-0.0204944	-0.0156295	-0.0045401	-0.00523076	0.0249411	0.0170333	0.0164484	-0.132038	-0.0835786	-0.00619025	-0.0291112	-0.0499297	0.000819553	-0.00466898	-0.0159812	-0.0294649	-0.04182	-0.0157179	-0.00789302	-0.0176228	-0.00980081	-0.0145553	0.00668479	0.0251054	-0.0471226	-0.0330741	0.00885383	-0.0087346	-0.00871615
F	TTT	-0.0220686	-0.010433	0.00193754	-0.0126989	-0.0218271	-0.00229086	0.0160825	-0.00856016	0.00799238	0.0376019	-0.0204032	-0.0032307	-0.0126993	-0.00940329	-0.0197618	-0.016822	-0.0315544	-0.0260088	-0.00949054	0.00422097	0.0137731	0.0277631	-0.000380902	0.0314343	-0.00732244	0.0173703	-0.100989	-0.0523644	-0.0163828	0.0331435	-0.107754	0.0375669	0.000360789	0.0120488	0.00676575	-0.030832	-0.00113633	-0.0166911	-0.00808588	0.00102011	-0.0404426	0.0394344	-0.044156	0.028659	-0.0304034	-0.00336101	-0.0269885	-0.0518438
L	TTA	-0.00682284	-0.0381588	-0.0396478	-0.013836	-0.0183378	0.015375	0.0311545	-0.00950631	0.0439563	0.00476221	0.0278767	0.0176883	-0.0192842	0.00249556	-0.0189465	0.00993826	-0.00812148	-0.0132646	0.0192441	0.0127704	-0.0216159	0.0154896	0.0155698	0.0156424	-0.00871693	-0.0358949	-0.166528	-0.0617947	-0.0264095	-0.0243769	-0.0592665	-0.00503994	0.00297659	0.0157592	0.00577134	0.00818033	0.0191063	0.0257315	-0.0248116	0.0129239	-0.00258865	0.0412784	0.0429335	0.0230261	-0.063289	0.0468376	0.0432893	0.0244324
L	TTG	-0.0231466	-0.00387922	-0.00921878	-0.018997	-0.00323325	-0.0204393	-0.0314976	0.000271862	-0.0121806	0.00966151	0.0119186	-0.00126547	-0.0224355	-0.0186609	0.00477594	-0.0162957	-0.0248759	0.0313105	0.0169043	-0.00476945	-0.0110375	0.0046846	-0.0845419	-0.0136768	-0.0101052	0.0314404	-0.0590394	-0.0269371	0.00780193	-0.0149599	-0.0862012	0.0231987	-0.0185468	-0.0172608	0.0199633	0.00685845	0.0038925	0.00156391	-0.011189	-0.0185292	-0.0300187	-0.00808106	-0.0368427	-0.00823631	0.0132558	0.0281118	-0.0349786	-0.0152873
Y	TAC	-0.0202124	-0.0359869	-0.0154313	-0.0116281	-0.018047	-0.0133874	-0.0421418	-0.0138964	-0.0117661	-0.00698278	-0.0477363	-0.0108991	-0.0468353	-0.0120336	-0.0260756	0.00554954	0.00319931	-0.0247026	-0.0130612	-0.0290493	-0.0190326	0.00691831	0.00714796	0.0220101	0.0130038	0.0173963	-0.0895502	-0.0624454	-0.0260139	0.0190622	-0.050326	0.0108585	-0.0290506	-0.00520144	-0.0324715	-0.0247467	0.013516	0.00265826	-0.0369915	-0.019907	-0.012854	0.0283169	-0.00441484	0.00583525	-0.0196464	-0.0238586	-0.00892264	0.0021061
Y	TAT	-0.00803384	-0.0155441	0.0164824	0.0152906	0.00166682	-0.0022756	-0.0483442	-0.03157	-0.00999906	-0.0213475	-0.00589044	-0.00422306	-0.00854496	-0.00925099	-0.0452444	-0.0243837	0.00856006	0.0368584	-0.00226529	-0.00342205	0.0209872	0.023617	-0.00385316	0.0169695	0.0233202	0.00866868	-0.0524697	-0.0515836	-0.00906557	0.00838562	-0.133851	0.029304	-0.00865089	-0.0152669	-0.00408645	-0.0220182	0.00875558	-0.00499685	-0.0288514	-0.00818124	0.0140975	-0.029852	-0.0312738	0.00377525	0.0070311	-0.0364781	-0.0178655	0.00380112
*	TAA	N/A	N/A	N/A	N/A	N/A	N/A	N/A	N/A	N/A	N/A	N/A	N/A	N/A	N/A	N/A	N/A	N/A	N/A	N/A	N/A	N/A	N/A	N/A	N/A	N/A	N/A	N/A	N/A	N/A	N/A	N/A	N/A	N/A	N/A	N/A	N/A	N/A	N/A	N/A	N/A	N/A	N/A	N/A	N/A	N/A	N/A	N/A	N/A
*	TAG	N/A	N/A	N/A	N/A	N/A	N/A	N/A	N/A	N/A	N/A	N/A	N/A	N/A	N/A	N/A	N/A	N/A	N/A	N/A	N/A	N/A	N/A	N/A	N/A	N/A	N/A	N/A	N/A	N/A	N/A	N/A	N/A	N/A	N/A	N/A	N/A	N/A	N/A	N/A	N/A	N/A	N/A	N/A	N/A	N/A	N/A	N/A	N/A
C	TGC	-0.0144037	-0.0221782	-0.00995382	-0.013151	-0.0164338	-0.0442623	-0.0162894	0.00194021	-0.0121304	0.00363672	-0.023308	-0.0137037	-0.0149688	-0.0232876	-0.0198752	-0.00728783	-0.0156772	-0.0089714	-0.019954	-0.00825145	-0.00284147	-0.0117164	-0.0409495	-0.0133721	-0.00668399	0.0379561	-0.0595544	-0.0580845	-0.00901993	-0.00669399	-0.0331284	-0.00337131	-0.0137283	-0.0454718	-0.00160669	-0.00595614	-0.0129241	-0.00373965	-0.034695	-0.00411475	-0.00887455	-0.0306063	0.00182798	-0.00257793	-0.0218213	-0.00237701	0.0123169	0.000590556
C	TGT	-0.0335606	-0.0217117	0.00410698	-0.00756608	-0.0234717	0.00275396	0.0262435	-0.00862732	-0.0185397	-0.00228403	0.000393913	-0.00154833	-0.0152261	-0.0194496	-0.0249215	-0.00932083	-0.0155572	-0.0163318	-0.0352187	-0.00478502	-0.01655	0.0165635	-0.00783599	-0.00771672	0.00798735	0.00769948	-0.0865301	-0.0319098	0.00315918	0.0050615	-0.0451831	-0.0172385	-0.0134344	0.031359	-0.000648509	-0.0718032	0.0390147	0.00735207	-0.0289435	0.0188314	-0.0325883	0.0282914	0.0112739	-0.0342043	-0.0505397	-0.00364995	-0.0300873	-0.00953143
*	TGA	N/A	N/A	N/A	N/A	N/A	N/A	N/A	N/A	N/A	N/A	N/A	N/A	N/A	N/A	N/A	N/A	N/A	N/A	N/A	N/A	N/A	N/A	N/A	N/A	N/A	N/A	N/A	N/A	N/A	N/A	N/A	N/A	N/A	N/A	N/A	N/A	N/A	N/A	N/A	N/A	N/A	N/A	N/A	N/A	N/A	N/A	N/A	N/A
W	TGG	-0.0203666	-0.0182946	-0.00988931	-0.0129109	-0.0146845	0.0054074	-0.00674107	-0.0104561	-0.00578729	-0.0183362	-0.00998852	-0.0197265	-0.00930042	-0.0114609	-0.00542405	0.00227003	-0.00460053	-0.00378424	-0.00350518	0.00541868	0.000726476	0.0108229	-0.0263786	-0.0363154	0.00935711	-0.00928261	-0.113847	-0.100438	-0.0247255	-0.00942355	-0.0717844	-0.00922451	-0.00645862	0.00482781	-0.00168846	0.0106968	-0.0381449	0.00436071	-0.089094	-0.00893908	0.00043897	0.0473604	-0.0362343	-0.0255726	-0.0139571	0.00231305	-0.041853	-0.00763435
T	ACC	-0.00397521	-0.0150879	0.00902666	-0.00860472	-0.00553522	-0.0143282	-0.0200785	-0.0152661	0.00368368	-0.0201608	0.00302828	-0.0225139	-0.0163604	-0.0119161	-0.0234246	-0.00922615	-0.00353362	-0.0284906	-0.0189043	-0.016191	-0.0144929	0.000791349	-0.000219346	-0.0107061	0.0251586	-0.0108421	-0.120327	-0.0599318	-0.0209313	-0.00279133	-0.0669654	0.000127766	-0.0312661	-0.00544797	0.00355166	-0.0100493	0.00970987	-0.00697548	-0.0329125	-0.0192516	0.00635983	0.0145757	-0.00845853	0.00339693	-0.00939435	-0.00141332	0.0250468	-0.000257367
T	ACT	-0.0276923	-0.00161971	-0.0267893	-0.0183106	-0.0168528	-0.024664	0.00551395	-0.0410065	0.000357196	-0.0074401	-0.0147791	0.00990696	-0.0182127	-0.00106635	-0.0167309	-0.0082709	-0.0379605	-0.0270724	-0.0201412	-0.0107219	0.00313327	0.00189586	-0.00673494	-0.00201495	0.00510763	0.000251878	-0.114643	-0.0940775	-0.0117091	-0.0318729	-0.0643546	0.0169335	-0.00104926	-0.00993449	-0.0258181	0.0130284	0.0144884	0.0224068	-0.0177119	-0.0488224	-0.010906	0.000275951	0.00480101	0.000586337	-0.00611763	0.0191547	-0.00371245	0.0591917
T	ACA	-0.0233644	-0.0214077	-0.0248208	-0.00686491	-0.0162408	0.0152243	-0.0278705	-0.0242697	-0.00733863	-0.0164787	0.0143418	0.00796348	-0.00624517	-0.0393968	-0.00845863	-0.0151139	-0.00942335	-0.0238643	-0.0344511	-0.013876	-0.0167418	-0.0034616	0.0124204	-0.00615196	-0.019116	0.016566	-0.168291	-0.120638	-0.0205799	-0.0223691	-0.0918071	0.0128042	0.00148157	-0.00159939	-0.0234115	-0.0145835	-0.0153069	-0.00170196	0.00408747	-0.0101941	-0.00334124	0.0243677	-0.00299774	-0.0185313	-0.00334968	0.0129927	-0.0374635	-0.00348685
T	ACG	-0.0119761	-0.0224458	-0.011717	-0.019563	-0.0272734	0.00609441	0.0152698	0.00722788	0.00841636	0.0147315	0.0110784	-0.00195093	-0.00786229	-0.00611586	-0.0236951	-0.0162368	-0.0146962	-0.0140457	-0.0125029	-0.0147954	-0.0136114	-0.0189605	-0.0316241	-0.0114652	-0.0491163	-0.00182429	-0.104692	-0.106174	-0.0133726	-0.0124096	-0.0868946	-0.00261494	-0.0137869	-0.0111071	0.00593312	-0.0134332	-0.0199918	0.0254674	-0.0225703	0.00562567	0.034243	0.0315193	-0.0388422	-0.00695783	0.00746116	0.041781	-0.0208989	0.0209434
I	ATC	-0.0119808	-0.018413	0.0106506	-0.0112488	-0.00917715	-0.0325158	-0.0352296	-0.0144409	-0.0179005	0.0141504	0.000401934	-0.012646	-0.00337074	-0.00678773	-0.0155081	-0.00340991	-0.0193363	-0.0100571	-0.0813403	-0.0300433	0.00762274	-0.0359847	-0.00886137	-0.0315017	-0.0168282	0.0309742	-0.144702	-0.0339774	0.00351193	0.0130082	-0.0431593	0.00373268	-0.018858	-0.00944487	0.0253751	-0.0110814	0.000663811	0.0181153	0.00860105	-0.0103948	0.0391346	0.0282906	0.00307446	-0.0531022	0.00856684	0.0473968	-0.0256477	0.00147708
I	ATT	-0.0271324	-0.0113001	0.00489901	-0.029879	-0.0102958	-0.00918465	-0.0181004	-0.0273489	-0.0262583	0.00489675	0.0146313	-0.00290738	0.00683556	-0.0109793	0.0109762	0.0149945	-0.0111133	-0.00755668	0.0137985	-0.0026866	0.0166313	0.01787	0.00275104	-0.00239913	0.0301085	0.0108307	-0.135197	-0.118934	-0.0148611	0.0222147	-0.10843	0.0381214	-0.0163604	0.0155762	0.00603746	-0.0101961	-0.00156436	0.00700031	-0.00588417	-0.00671169	0.00689797	0.0191567	0.0462546	0.0105246	0.0160873	0.012159	0.00167707	-0.000753911
I	ATA	-0.0231871	-0.0378016	0.0182602	-0.00348846	-0.00893399	-0.00835655	-0.0120508	-0.00459604	-0.0139871	-0.0115036	0.0273268	0.0104062	-0.0146531	0.0238078	0.00906748	-0.00389287	0.00988811	-0.0275248	-0.00817244	-0.0127295	-0.0164176	-0.00627415	0.00424071	0.00393145	0.00245985	0.0226873	-0.133134	-0.07699	0.0142576	-0.0126779	0.000560092	0.0111671	0.0134541	-0.0059184	-0.00205409	0.006095	-0.0108885	0.0193092	0.0534632	0.0203313	0.0105924	0.055674	0.011985	0.0323316	-0.0152812	0.0347094	0.0271051	0.0281618
M	ATG	-0.0374089	-0.018973	0.0245612	-0.00410987	-0.0225836	-0.0136509	-0.0248151	0.0234268	0.0261909	0.0186673	0.0213847	0.016096	-0.00344757	0.00566054	-0.0104735	0.00803062	-0.016481	-0.0100045	-0.000508368	0.0166765	0.0174896	0.0615583	0.0442717	0.0259773	-0.0504321	0.0263563	-0.127987	-0.0544735	0.000433446	0.00920182	-0.0955883	0.0486682	0.0168351	0.0223551	0.0305041	0.0518666	0.0285457	0.0677976	0.0525172	0.0296052	-0.00925785	0.0356685	0.0721695	0.032802	0.0138624	0.0590822	0.0117516	0.00455552
N	AAC	-0.00672358	-0.013435	0.0134216	-0.0126705	-0.0195363	-0.0598736	-0.0230656	-0.00040493	-0.0221887	-0.0154237	-0.00721678	0.000171171	-0.0165957	-0.0305621	-0.0201795	-0.024244	-0.000492589	-0.0384785	0.0059757	-0.00636037	-0.00765357	-0.00438753	0.0109874	-0.017857	-0.0217947	-0.0374942	-0.0984875	-0.0615716	0.000363163	-0.0111051	-0.110004	0.0196482	-0.0113137	-0.00651468	-0.0324686	-0.00982358	-0.00472622	-0.0202453	-0.0309379	-0.00690773	-0.00511508	-0.00873882	-0.00334317	-0.0208567	-0.00477	-0.0134087	-0.0119078	0.001151
N	AAT	-0.0305524	-0.0170146	-0.00707413	-0.012551	0.00208738	0.00400037	-0.0660591	-0.0120558	-0.0195648	0.00959745	-0.0141356	-0.00964628	-0.0104742	-0.0201819	-0.0273089	-0.0153419	-0.029924	-0.0123556	-0.0442893	-0.0212905	-0.0500593	-0.0172254	-0.0412553	-0.0204492	0.00932476	0.0131616	-0.0771073	-0.0595429	-0.0169258	0.0127867	-0.0286701	0.000266943	-0.0155983	-0.0292953	-0.0149643	-0.00109328	0.0305114	0.0246004	0.00104193	-0.00755083	-0.00924588	-0.00705033	-0.00314903	0.0190328	0.0157882	-0.0564989	-0.00597788	-0.0186513
K	AAA	-0.00615596	-0.0363372	-0.0170237	-0.006277	-0.0180673	-0.00144736	0.01071	0.0187113	-0.0134511	-0.00855599	-0.0104932	-0.0167421	-0.00240134	0.011877	-0.00365146	-0.00508034	-0.00313407	-0.0233538	0.0206037	0.00618266	-0.00730496	0.0448801	-0.0322148	-0.00869574	0.00904048	0.0349649	-0.201803	-0.134098	-0.0424828	-0.0204162	-0.0241532	0.00304933	0.00921824	0.0104118	0.0206517	0.0319169	0.011638	0.0315674	-0.0241586	-0.0318729	-0.0381406	0.0214753	-0.0204348	0.0147288	-0.0139848	0.0181301	-0.00701363	-0.00681496
K	AAG	-0.0249755	-0.0191208	-0.0150812	-0.0260489	-0.000479011	-0.0380894	-0.00929114	-0.0214621	-0.0146636	-0.00499816	0.00210173	-0.00532095	-0.00654247	-0.0244718	-0.0109595	-0.0231547	-0.0113208	-0.0165966	-0.0256984	-0.0109544	-0.0331797	0.0133804	0.000130529	-0.00788495	0.0203263	-0.0251882	-0.0665496	-0.0501905	0.00638738	-0.0538376	-0.0542851	0.0230294	0.0107512	0.00115349	0.0126874	-0.0291373	-0.0255464	-0.00657833	0.0419025	0.0270167	0.000535404	0.0126598	-0.0128229	-0.0190248	-0.0199958	0.0166203	-0.0340418	0.000344299
S	AGC	-0.0127399	-0.0206194	0.000743921	-0.0201535	-0.0114392	-0.0231731	-0.0489892	-0.00080212	-0.0266783	-0.0340406	-0.00995797	-0.0126435	-0.00481236	-0.00433548	-0.0141046	-0.0194147	-0.01458	-0.0152733	0.00041018	-0.00842302	-0.0174551	0.0170104	-0.0276733	-0.0175438	0.0100126	-0.0123485	-0.113233	-0.0822984	-0.0346392	-0.00319342	-0.0965253	-0.00330581	-0.00897774	-0.0465082	-0.0136587	-0.0120827	-0.0413292	-0.0438801	0.00109133	0.00554854	-0.0291711	0.0352475	0.00296232	-0.0111633	0.00452973	-0.034674	0.0110704	-0.00425797
S	AGT	-0.0393895	-0.0119554	-0.0199353	-0.0061514	-0.034148	0.0103802	-0.0315272	-0.03791	-0.0232023	-0.0144178	-0.0111828	-0.00694463	-0.0205991	0.0054303	-0.00595212	-0.0167463	-0.0145461	-0.00593918	0.0076427	-0.010807	-0.0120734	-0.018744	0.000343093	0.0271043	-0.005423	0.0196318	-0.16136	-0.130888	-0.00108226	0.00147473	-0.0834447	-0.0578281	-0.0203087	-0.00446949	-0.0120734	0.00169183	-0.0111787	0.0206229	-0.00557466	0.0116426	-0.035776	-0.0267847	0.0385106	-0.0106374	-0.0413035	-0.00573666	-0.0188639	-0.0235865
R	AGA	-0.0247799	-0.0116167	-0.0234926	-0.0109729	-0.0016391	-0.00930474	0.0395272	-0.0257574	-0.0243453	0.00544981	-0.0283655	-0.00144035	-0.0222827	-0.00380089	-0.0134026	-0.015706	-0.0199708	-0.0323116	0.0239102	-0.030091	0.000922005	-0.0245662	0.0138384	0.0111147	-0.00462694	0.047864	-0.0932321	-0.0887353	-0.00491101	0.0112003	-0.117207	0.00159126	-0.0110299	-0.0075187	-0.0179949	0.00740461	-0.0243361	-0.00556412	0.0124144	-0.0239335	-0.00921865	0.0135523	-0.000133538	-0.030571	-0.0084728	-0.03995	-0.0185572	-0.00263381
R	AGG	-0.0139246	-0.00654594	-0.0236466	-0.020972	-0.018955	-0.0263362	-0.0743826	-0.0166701	-0.0195538	0.00626199	0.00551159	0.0214717	0.00675718	0.00454846	-0.00755696	-4.96584e-05	-0.0134941	0.00648966	0.00813387	0.0184399	-0.0149472	-0.00737522	-0.00431945	-0.0116049	-0.000534712	0.0444241	-0.117262	-0.0816023	-0.00952681	-0.0089204	-0.0492667	0.00632579	-0.0159243	0.0157212	0.00742376	-0.0300904	-0.0218497	0.0506467	0.043051	0.00100803	-0.00644773	0.0235037	-0.0528953	0.0191455	-0.0406936	-0.000893979	-0.0456888	0.030031
A	GCC	-0.0090477	-0.0102701	-0.00719247	-0.018342	-0.0138522	-0.0328578	-0.0328425	-0.0166099	-0.00547001	-0.0201627	-0.0172961	0.00794199	-0.0154092	-0.00796875	-0.0122545	-0.00557638	-0.0155756	-0.0277635	0.00284787	-0.0141771	-0.00091572	-0.0160765	-0.0131936	-6.8159e-05	-0.00525884	-0.0284342	-0.12731	-0.0990453	-0.0254126	-0.0393425	-0.069201	0.00388899	-0.0108541	-0.00151577	-0.0239085	-0.00136458	-0.00681833	-0.01574	-0.0253639	0.0102733	-0.0118429	0.0151746	0.00742925	-0.00771992	-0.019437	-0.0167491	-0.00934851	-0.0298685
A	GCT	-0.00995289	-0.0109673	-0.00329999	-0.00865713	-0.025855	-0.0200718	-0.0369914	-0.0134225	-0.00759622	-0.000496614	-0.0153987	-0.00859894	-0.0185236	-0.00869282	-0.00532389	-0.00909839	-0.0206284	-0.00467903	-0.00485335	-0.00579586	-0.00765129	-0.0337807	-0.0020264	-0.0105056	-0.0195469	9.51052e-05	-0.0768073	-0.0914455	-0.0299629	-0.0188029	-0.104294	-0.00225201	-0.00650698	-0.0198267	-0.0220697	-0.00541392	-0.00349215	-0.000764995	-0.00860682	0.000656204	-0.0100735	-0.0225219	0.0237426	0.0102626	-0.00613613	-0.00386716	0.00822179	-0.0125945
A	GCA	-0.0177003	-0.0191612	-0.0179563	-0.0173912	-0.00206054	-0.0406924	-0.0450906	-0.0292205	-0.00797008	-0.0274987	0.00951219	-0.00967103	-0.0143685	-0.017623	-0.0143487	-0.00632684	-0.00536373	-0.0111407	-0.0179918	-0.0212426	-0.0245366	-0.0255617	-0.0341002	0.00184901	-0.0163074	-0.00311503	-0.208433	-0.0855563	-0.0156089	0.0159072	-0.11532	-0.00957097	-0.0099411	0.00779505	-0.00701418	0.00258215	-0.0186694	0.0188668	0.0309734	0.00918328	-0.00938371	0.0451916	0.00768151	-0.0171318	-0.0242491	-0.00868691	-0.0132542	-0.020804
A	GCG	-0.0107946	-0.0176532	-0.00980426	-0.015783	-0.0160105	-0.0234297	-0.0358344	-0.0053773	-0.0210442	0.000530986	-0.00742421	-0.0171634	-0.00300509	-0.000749742	-0.00299387	-0.00258503	-0.0129237	0.00688843	-0.025614	-0.0193863	-0.0162307	0.00582167	-0.0364454	0.00135759	-0.0184628	0.00917733	-0.156405	-0.0989068	-0.019561	-0.0224473	-0.109492	-0.0052748	-0.0306066	-0.00580683	-0.03517	-0.0245895	-0.00147803	-0.0312778	-0.00378032	-0.00893284	-0.00617227	-0.0104593	-0.0285283	-0.00160063	-0.000408109	-0.0423804	-0.0153033	-0.0172663
V	GTC	-0.0153695	-0.0199367	-0.00505605	-0.0157116	-0.015351	-0.0318618	-0.0227001	-0.0110476	-0.0056876	-0.0214649	-0.0285264	0.00200827	-0.00771692	-0.0235718	0.00214548	-0.00474245	-0.00756914	-0.0169777	-0.0275174	-0.0297362	-0.0182901	-0.0418601	-0.000718557	0.0113562	0.0183728	-0.0315464	-0.213064	-0.0564635	-0.00660674	-0.0126484	-0.0650687	-0.0129816	-0.00346921	-0.015589	-0.0243152	-0.0190013	0.00152477	0.0177791	-0.00865116	-0.0128337	-0.0197452	-0.012195	-0.0256025	-0.0188903	-0.028426	-0.00339272	-0.00740196	-0.0150806
V	GTT	-0.0251075	-0.0133575	-0.0210536	-0.0140989	-0.0194542	-0.0188524	0.015242	-0.0296953	-0.0184633	-0.0176112	-0.0232311	-0.000922445	-0.00795609	-0.000297205	-0.0211127	0.00791323	-0.0217878	0.0131134	-0.0123475	-0.0019231	-0.0191959	-0.00796019	-0.0290478	0.00307775	0.00952108	0.0531516	-0.0483005	-0.112966	-0.00412918	-0.00115255	-0.0595891	0.0303087	-0.0307218	0.00808433	-0.0065967	0.00907039	-0.0241014	0.00172204	0.00546511	-0.0245333	0.00121288	-0.00550249	-0.0167666	0.0311008	-0.00314846	-0.0278846	0.00317255	-0.0171232
V	GTA	-0.0247865	-0.00614953	-0.0243427	-0.0227439	-0.0200394	-0.0428279	-0.0112173	-0.00455584	-0.0106589	0.00713563	0.0116402	0.00599215	-0.000923264	-0.0236237	0.0110364	0.015355	0.0178929	-0.0164801	-0.023487	-0.000557435	-0.000317942	0.0483527	0.0141593	-0.0248499	-0.00723897	0.0364874	-0.136292	-0.127027	-0.00931538	0.00387612	-0.0717908	0.0090981	-0.0217471	0.0113045	0.0161371	-0.0170861	-0.00273983	0.0033644	-0.0122891	0.00127005	0.0160496	0.0152884	-0.000915706	0.0101165	0.00981653	-0.0128299	0.0545545	-0.00352644
V	GTG	-0.00934307	-0.0233492	-0.0197862	-0.00649752	0.00336619	-0.0191245	-0.0254167	-0.0159028	-0.0192332	-0.00581515	0.0241557	-0.0264919	0.00369844	-0.00984919	-0.0162847	-0.00828901	-0.00949908	-0.0253267	-0.0131688	0.00990924	-0.00794343	-0.0112744	0.00957361	0.0248657	-0.0299448	-0.00511828	-0.0979106	-0.0386673	-0.0198397	-0.0179737	-0.0885817	0.0185707	-0.00416397	0.0224017	-0.00596486	-0.00548969	-0.0043393	0.00364965	0.00867283	-0.0142797	-0.0073142	7.45238e-05	0.0453925	0.0229862	-0.0252269	0.00954198	0.00103851	0.00105131
D	GAC	-0.0126881	0.00122763	0.00169746	-0.0186956	-0.0126689	-0.0280787	-0.0323534	-0.022753	-0.00951404	-0.0032838	-0.00316687	-0.00579758	-0.0146055	-0.00723345	-0.00436485	-0.00864782	-0.0199027	-0.0420076	-0.0194602	-0.0357111	-0.0104618	-0.023685	-0.0295768	-0.0218901	-0.00105135	-0.0468782	-0.134827	-0.071262	-0.0199942	-0.00837728	-0.0562736	-0.00523894	-0.0194543	-0.000217335	0.00857226	-0.0255624	-0.0136944	0.00599921	-0.0420799	-0.00260824	-0.023955	-0.0168075	-0.0213208	-0.0509358	-0.0149764	-0.036393	-0.0254467	-0.0334975
D	GAT	-0.0221234	-0.0151638	-0.0177288	-0.0213808	-0.0232946	-0.0104152	-0.0925578	-0.0337005	-0.0190844	-0.0314678	-0.0167526	-0.0101146	0.00388083	0.00869825	-0.0534165	-0.0312771	-0.00910603	-0.0306519	0.0018851	-0.0278973	-0.00728306	0.020818	-0.0540199	0.00227752	0.00855282	-0.00906127	-0.10408	-0.1026	-0.0301717	0.0153307	-0.00568654	0.00562576	-0.0124207	-0.029437	-0.0198664	-0.00824938	-0.0173135	-0.0193623	0.00963163	-0.0112907	-0.0319055	-0.00553866	-0.0243284	-0.0463557	-0.00151168	-0.0125291	0.0179323	-0.0105891
E	GAA	-0.0221286	-0.0224702	-0.0126282	-0.0102665	-0.0263153	-0.00787498	-0.0300877	-0.00336494	0.00350787	-0.01482	-0.0277566	-0.0230495	-0.00104253	-0.0253061	-0.0294146	0.00699194	-0.0123368	0.0198005	0.0305881	-0.0233861	-0.0211612	-0.0623662	-0.0907355	-0.00745159	-0.00605649	0.00800882	-0.0903905	-0.125073	0.00433736	-0.0178447	-0.0943111	0.0346321	-0.0160927	0.00328436	-0.0196201	-0.00973271	0.00177591	-0.0185786	-0.0159545	0.00732676	-0.0303957	-0.0152954	0.00171022	0.000943698	-0.00722753	0.00746913	-0.00957127	-0.0176514
E	GAG	-0.00533325	-0.0389639	-0.00789159	0.00440629	-0.00445922	0.0136187	-0.00853341	-0.0213161	-0.0202553	0.0017056	-0.0194876	-0.0351727	-0.0117856	-0.0500579	-0.0265087	-0.0299311	-0.035264	-0.0337979	-0.0443871	-0.0384864	-0.0309218	0.0033592	-0.025441	-0.00509967	-0.0245219	-0.0186063	-0.033236	-0.0490936	-0.000759648	-0.0155468	-0.0870436	0.0107448	-0.000843146	-0.0151776	0.00443539	-0.010853	-0.0207987	-0.0581405	-0.0307074	-0.02605	0.00311363	-0.0075624	-0.0569164	0.0205775	-0.0136063	-0.0463735	0.000782989	-0.00183308
G	GGC	-0.01172	-0.0150017	-0.0049611	-0.0087894	-0.0202784	-0.016706	-0.0358351	-0.0150614	-0.0204978	-0.00775924	-0.0145141	-0.00711911	-0.00668813	-0.0265467	-0.0208181	-0.00341639	-0.00513873	-0.0168876	-0.00573129	0.000778392	-0.00520267	-0.0450724	-0.0304146	-0.0151344	-0.000622166	-0.00690896	-0.079444	-0.107928	-0.00622785	-0.0176251	-0.0917596	0.00103998	-0.00550191	-0.0127907	-0.023833	-0.0314998	-0.00623856	-0.0224396	0.00933805	-0.0093967	-0.00653041	-0.0436056	0.011329	-0.0228148	-0.00585114	-0.0364232	-0.0284645	-0.0166196
G	GGT	-0.0144021	-0.00780992	-0.00515962	-0.00438198	-0.0106498	-0.0292159	-0.0598254	-0.00797748	-0.0141219	-0.019561	-0.0184508	0.000830715	-0.00924865	0.0049551	-0.0288809	0.00114392	-0.0384028	-0.0142022	-0.0197647	-0.0106815	0.00766403	-0.0292421	-0.00941983	-0.00595201	-0.0297682	-0.0109699	-0.149569	-0.119289	0.0102878	-0.0186252	-0.1014	-0.0147028	-0.00432021	-0.0101845	-0.0351247	-0.0166605	-0.0237439	-0.000572674	0.000928404	0.00128787	-0.0184381	-0.0101682	-0.0407145	-0.00622515	-0.00792298	-0.00642914	-0.0335337	-0.0218026
G	GGA	-0.0284296	-0.0106441	-0.0108263	-0.0127879	-0.0165535	-0.0268273	-0.041575	-0.0303415	-0.0219961	-0.0098006	-0.0682664	-0.00498047	-0.022213	-0.0387429	-0.0201071	-0.00996049	-0.00637341	-0.0104075	-0.0161993	-0.0401456	-0.00690788	0.0118674	-0.0635985	-0.0202492	-0.00627391	-0.0186084	-0.171963	-0.0469128	-0.00452181	-0.0493725	-0.0767284	0.00915426	-0.0103827	-0.0259031	-0.00509751	-0.0135097	-0.0439426	0.0253974	-0.0187404	-0.0182472	-0.0211546	-0.038578	0.0148641	-0.0308055	-0.0258449	-0.0347379	-0.0116481	-0.0121954
G	GGG	-0.00754926	-0.00823668	-0.00373091	-0.00685538	-0.0143381	-0.0147692	-0.0210254	-0.0193234	-0.000380261	-0.0131257	-0.0146067	-0.00828366	-0.0089344	-0.0135747	0.00176137	0.00911617	-0.00419487	0.0127111	0.00433492	-0.00946326	-0.0105291	-0.0135586	0.00436746	0.0117098	-0.00630799	-0.0342277	-0.0593355	-0.0898695	-0.0233065	0.0093784	-0.0127527	0.017025	-0.00270749	-0.00668846	0.00762755	-0.00723577	-0.0137928	-0.00617257	-0.00188441	-0.0291777	-0.00272217	0.00038426	0.0133416	-0.00185469	-0.0192969	-0.0458085	0.0125758	0.00542279
[truncated: 214 more columns]

## Sheet: P-value for 2D codon heatmap
P-values for shuffled datasets exceeding experimental data of 2-dimensional representation of stalling propensities with the corresponding codons located in the P- and A-sites
P\A		Codons located in the A-site
		CCC	CCT	CCA	CCG	CTC	CTT	CTA	CTG	CAC	CAT	CAA	CAG	CGC	CGT	CGA	CGG	TCC	TCT	TCA	TCG	TTC	TTT	TTA	TTG	TAC	TAT	TAA	TAG	TGC	TGT	TGA	TGG	ACC	ACT	ACA	ACG	ATC	ATT	ATA	ATG	AAC	AAT	AAA	AAG	AGC	AGT	AGA	AGG
P	CCC	1	1	1	1	0.841476	0.963111	1	0.911266	0.634098	0.944167	0.596211	0.762712	0.516451	0.920239	0.997009	0.791625	0.978066	0.450648	0.556331	0.444666	0.666999	0.0209372	0.852443	1	0.556331	0.733799	1	1	0.969093	0.742772	1	0.644068	0.957129	0.927218	0.971087	0.84347	0.483549	0.128614	0.251246	0.315055	0.645065	0.94317	0.198405	0.321037	0.92323	0.118644	0.39681	0.631107
P	CCT	1	0.998006	0.97009	0.976072	0.0538385	0.881356	1	0.676969	0.394816	0.00797607	0.0618146	0.834497	0.471585	0.580259	0.763709	0.830508	0.962114	0.822532	0.0887338	0.835494	0.851446	0.871386	0.468594	0.207378	0.856431	0.68993	0.993021	1	0.938185	0.701894	0.999003	0.686939	0.611167	0.7667	0.506481	0.00199402	0.729811	0.64008	0.0149551	0.259222	0.127617	0.785643	0.901296	0.0927218	0.856431	0.95015	0.0957129	0.918245
P	CCA	1	1	0.988036	1	0.227318	0.95015	0.892323	0.226321	0.547358	0.718843	0.200399	0.961117	0.848455	0.907278	0.655035	0.675972	0.671984	0.236291	0.36989	0.292124	0.0498504	0.34995	0.663011	0.321037	0.234297	0.665005	1	1	0.147557	0.578265	1	0.0508475	0.985045	0.205384	0.791625	0.783649	0.389831	0.807577	0.251246	0.353938	0.150548	0.66999	0.335992	0.815553	0.651047	0.899302	0.645065	0.894317
P	CCG	1	0.991027	1	1	0.999003	1	1	0.25324	1	0.741775	0.405783	0.864407	0.727817	0.32004	0.958126	0.918245	0.313061	0.678963	0.467597	0.985045	0.285145	0.622134	0.765703	0.305085	0.408774	0.82652	1	1	0.514457	0.717846	1	0.718843	0.500499	0.740778	0.0159521	0.312064	0.501496	0.532403	0.794616	0.185444	0.4666	0.77667	0.492522	0.951147	0.299103	0.67996	0.74676	0.915254
L	CTC	0.613161	0.759721	0.739781	0.546361	0.260219	0.582253	0.567298	0.234297	0.00498504	0.880359	0.0139581	0.850449	0.346959	0.4666	0.199402	0.134596	0.56331	0.313061	0.882353	0.169492	0.682951	0.462612	0.778664	0.905284	0.196411	0.792622	0.891326	0.462612	0.42672	0.637089	0.919242	0.0348953	0.169492	0.337986	0.477567	0.0259222	0.551346	0.472582	0.134596	0.617149	0.666999	0.352941	0.357926	0	0.346959	0.782652	0.993021	0.0628116
L	CTT	0.900299	0.57328	0.80658	0.0488534	0.842473	0.975075	0.988036	0.889332	0.370887	0.661017	0.19342	0.687936	0.945165	0.510469	0.949153	0.134596	0.559322	0.196411	0.946162	0.834497	0.632104	0.547358	0.614158	0.490528	0.387836	0.443669	0.996012	0.999003	0.0109671	0.979063	0.882353	0.412762	0.92323	0.690927	0.635095	0.308076	0.47657	0.164506	0.163509	0.333998	0.109671	0.582253	0.132602	0.556331	0.0568295	0.222333	0.979063	0.251246
L	CTA	0.645065	0.346959	0.429711	0.231306	0.741775	0.8335	0.524427	0.298106	0.946162	0.820538	0.781655	0.161515	0.99003	0.145563	0.485543	0.701894	0.629113	0.399801	0.274177	0.77667	0.741775	0.542373	0.278166	0.762712	0.411765	0.272183	0.987039	0.82652	0.374875	0.274177	0.981057	0.0847458	0.0279163	0.256231	0.504487	0.323031	0.189432	0.930209	0.51346	0.150548	0.637089	0.188435	0.113659	0.00299103	0.134596	0.819541	0.785643	0.0428714
L	CTG	0.276171	0.624128	0.129611	0.00598205	0.254237	0.417747	0.0667996	0.0887338	0.195414	0.434696	0.0877368	0.250249	0.176471	0.44666	0.364905	0.457627	0.676969	0.368893	0.665005	0.176471	0.362911	0.60319	0.781655	0.750748	0.898305	0.254237	0.98006	1	0.800598	0.906281	0.999003	0.305085	0.701894	0.515454	0.475573	0.14656	0.803589	0.0269192	0.737787	0.355932	0.0229312	0.795613	0.184447	0.0538385	0.429711	0.64008	0.919242	0.727817
H	CAC	0.468594	0.591226	0.0149551	0.309073	0.388833	0.585244	0.0468594	0.949153	0.458624	0.239282	0.0289133	0.380857	0.302094	0.425723	0.66999	0.773679	0.112662	0.500499	0.322034	0.65005	0.561316	0.647059	0.687936	0.771685	0.47657	0.27318	0.908275	0.890329	0.0638086	0.211366	0.768694	0.00997009	0.350947	0.462612	0.0558325	0.676969	0.408774	0.367896	0.571286	0.81655	0.10668	0.871386	0.615155	0.147557	0.625125	0.585244	0.48654	0.341974
H	CAT	0.971087	0.40678	0.527418	0.864407	0.52343	0.881356	0.884347	0.135593	0.25324	0.0707876	0.515454	0.814556	0.779661	0.692921	0.770688	0.118644	0.43669	0.824526	0.703888	0.0807577	0.490528	0.394816	0.782652	0.415753	0.836491	0.919242	0.984048	0.992024	0.765703	0.124626	0.964108	0.376869	0.400798	0.798604	0.205384	0.862413	0.779661	0.419741	0.891326	0.735793	0.410768	0.316052	0.490528	0.1665	0.291127	0.995015	0.687936	0.0159521
Q	CAA	0.0568295	0.0358923	0.578265	0.462612	0.376869	0.809571	0.670987	0.574277	0.234297	0.169492	0.594217	0.803589	0.301097	0.437687	0.34995	0.0329013	0.00299103	0.411765	0.599202	0.0139581	0.0598205	0.342971	0.175474	0.945165	0.595214	0.0388833	1	0.895314	0.190429	0.614158	0.979063	0.155533	0.487537	0.423729	0.132602	0.157527	0.507478	0.200399	0.552343	0.269192	0.0398804	0.0319043	0.314058	0.260219	0.738784	0.360917	0.0119641	0.143569
Q	CAG	0.60319	0.807577	0.0209372	0.168495	0.34995	0.601196	0.764706	0.176471	0.272183	0.354935	0.0348953	0.619143	0.00398804	0.230309	0.986042	0.0388833	0.185444	0.606181	0.00498504	0.625125	0.851446	0.737787	0.90329	0.328016	0.0508475	0.48654	0.973081	0.992024	0.384845	0.613161	0.998006	0.00997009	0.133599	0.58325	0.29013	0.344965	0.472582	0.644068	0.490528	0.387836	0.271186	0.0697906	0.0199402	0.644068	0.763709	0.200399	0.000997009	0.00997009
R	CGC	0.318046	0.92323	0.794616	0.200399	0.0428714	0.397807	0.991027	0.770688	0.575274	0.134596	0.0907278	0.572283	0.144566	0.238285	0.682951	0.0119641	0.0378863	0.57328	0.708873	0.0179462	0.0289133	0.473579	0.134596	0.74676	0.455633	0.992024	0.634098	0.823529	0.598205	0.99003	1	0.000997009	0.187438	0.0987039	0.212363	0.567298	0.417747	0.750748	0.324028	0.345962	0.404786	0.0548355	0.845464	0.0119641	0.639083	0.0987039	0.0229312	0.0418744
R	CGT	0.896311	0.108674	0.182453	0.764706	0.616152	0.427717	0.757727	0.415753	0.675972	0.911266	0.0309073	0.18345	0.227318	0.42672	0.955135	0.598205	0.964108	0.795613	0.671984	0.622134	0.536391	0.363908	0.545364	0.965105	0.641077	0.325025	1	0.984048	0.161515	0.368893	1	0.250249	0.546361	0.317049	0.0618146	0.403789	0.281157	0.395813	0.382851	0.935194	0.395813	0.918245	0.151545	0.860419	0.610169	0.0239282	0.686939	0.666999
R	CGA	0.712861	0.675972	0.215354	0.871386	0.973081	0.823529	1	0.792622	0.519442	0.92323	0.500499	0.928215	0.48654	0.645065	0.794616	0.00897308	0.133599	0.827517	0.900299	0.748754	0.0299103	0.778664	0.939182	0.721834	0.199402	0.497507	0.974078	0.972084	0.40678	0.700897	0.981057	0.234297	0.748754	0.272183	0.962114	0.601196	0.212363	0.91326	0.473579	0.0947159	0.574277	0.922233	0.457627	0.607178	0.623131	0.984048	0.0199402	0.0139581
R	CGG	0.0618146	0.25324	0.201396	0.0229312	0.618146	0.659023	0.753739	0.216351	0.227318	0.266201	0.266201	0.348953	0.0189432	0.345962	0.525424	0.103689	0.31007	0.0209372	0.0129611	0.0947159	0.411765	0.648056	0.912263	0.316052	0.239282	0.0398804	1	1	0.237288	0.177468	1	0.19342	0.464606	0.239282	0.0518445	0	0.695912	0.275174	0.307079	0.394816	0.616152	0.993021	0.724826	0.00598205	0.228315	0.387836	0.838485	0.00199402
S	TCC	0.0398804	0.425723	0.00697906	0.598205	0.262213	0.000997009	0.918245	0.354935	0.524427	0.29013	0.712861	0.0518445	0.63011	0.0458624	0.962114	0.327019	0.515454	0.401795	0.742772	0.485543	0.772682	0.531406	0.752742	0.645065	0.0747757	0.399801	1	1	0.246261	0.962114	0.999003	0.0628116	0.287139	0.744766	0.558325	0.00299103	0.391825	0.939182	0.0677966	0.656032	0.28016	0.353938	0.802592	0.691924	0.722832	0.606181	0.744766	0.420738
S	TCT	0.319043	0.471585	0.645065	0.54337	0.84347	0.315055	0.0947159	0.599202	0.195414	0.658026	0.398804	0.0797607	0.601196	0.424726	0.0329013	0.171486	0.470588	0.586241	0.41675	0.228315	0.761715	0.325025	0.922233	0.1665	0.167498	0.236291	0.964108	0.994018	0.475573	0.547358	0.977069	0.0149551	0.889332	0.0408774	0.239282	0.0448654	0.50349	0.198405	0.744766	0.0398804	0.215354	0.661017	0.316052	0.546361	0.678963	0.54337	0.00897308	0.163509
S	TCA	0.881356	0.882353	0.0588235	0.986042	0.528415	0.906281	0.904287	0.758724	0.220339	0.41675	0.140578	0.200399	0.624128	0.930209	0.750748	0.264207	0.676969	0.803589	0.739781	0.876371	0.636092	0.0997009	0.329013	0.449651	0.0139581	0.0907278	1	1	0.535394	0.0159521	0.997009	0	0.647059	0.407777	0.356929	0.976072	0.408774	0.78664	0.555334	0.559322	0.551346	0.00797607	0.464606	0.42672	0.947159	0.835494	0.859422	0.771685
S	TCG	0.284148	0.675972	0.524427	0.684945	0.770688	0.600199	0.988036	0.73679	0.160518	0.15653	0.966102	0.684945	0.176471	0.879362	0.627119	0.478564	0.964108	0.8335	0.175474	0.618146	0.0797607	0.631107	0.232303	0.882353	0.382851	0.510469	1	1	0.266201	0.969093	1	0.0199402	0.0229312	0.643071	0.839482	0.153539	0.122632	0.587238	0.847458	0.656032	0.0727817	0.945165	0.902293	0.568295	0.677966	0.60319	0.109671	0.000997009
F	TTC	0.772682	0.0388833	0.0179462	1	0.928215	0.141575	0.998006	0.995015	0.360917	0.812562	0.275174	0.182453	0.283151	0.0358923	0.944167	0.0578265	0.0827517	0.118644	0.999003	0.727817	0.489531	0.306082	0.39681	0.0169492	0.102692	0.270189	1	1	0.251246	0.762712	0.932203	0.133599	0.209372	0.504487	0.757727	0.945165	0.434696	0.378863	0.524427	0.347956	0.526421	0.165503	0.0289133	0.942173	0.858425	0.110668	0.366899	0.279163
F	TTT	0.788634	0.390828	0.144566	0.432702	0.624128	0.267198	0.0628116	0.351944	0.0707876	0.0338983	0.666999	0.281157	0.411765	0.411765	0.582253	0.541376	0.841476	0.754736	0.453639	0.108674	0.133599	0.0727817	0.266201	0.0159521	0.381854	0.123629	0.974078	0.916251	0.550349	0.0368893	1	0.00299103	0.206381	0.119641	0.162512	0.838485	0.211366	0.505484	0.41675	0.219342	0.92323	0.0279163	0.794616	0.0408774	0.797607	0.338983	0.694915	0.973081
L	TTA	0.351944	0.92323	0.917248	0.532403	0.667996	0.307079	0.0438684	0.531406	0.00697906	0.470588	0.18345	0.141575	0.74676	0.289133	0.653041	0.0877368	0.502493	0.667996	0.198405	0.0877368	0.718843	0.29013	0.226321	0.24327	0.59322	0.914257	1	0.928215	0.732802	0.714855	0.926221	0.531406	0.145563	0.184447	0.304088	0.0947159	0.151545	0.150548	0.836491	0.288136	0.521436	0.0598205	0.108674	0.154536	0.983051	0.0458624	0.0139581	0.0388833
L	TTG	0.797607	0.187438	0.319043	0.637089	0.120638	0.614158	0.795613	0.186441	0.408774	0.0877368	0.108674	0.142572	0.732802	0.578265	0.112662	0.530409	0.784646	0.00199402	0.0169492	0.325025	0.532403	0.108674	1	0.681954	0.403789	0.0598205	0.878365	0.71984	0.0827517	0.784646	1	0.0189432	0.600199	0.491525	0.0438684	0.0448654	0.161515	0.267198	0.437687	0.604187	0.785643	0.371884	0.788634	0.386839	0.0299103	0.0408774	0.844467	0.504487
Y	TAC	0.794616	0.961117	0.637089	0.463609	0.617149	0.546361	0.870389	0.568295	0.47657	0.462612	0.973081	0.519442	0.997009	0.472582	0.783649	0.0209372	0.0458624	0.702891	0.421735	0.830508	0.599202	0.117647	0.234297	0.0588235	0.0468594	0.281157	0.994018	0.992024	0.721834	0.0697906	0.921236	0.0329013	0.839482	0.458624	0.815553	0.767697	0.0558325	0.392822	0.799601	0.723829	0.473579	0.0348953	0.285145	0.134596	0.613161	0.724826	0.518445	0.135593
Y	TAT	0.289133	0.677966	0.0378863	0.00997009	0.26321	0.409771	0.910269	0.914257	0.384845	0.696909	0.315055	0.289133	0.367896	0.600199	0.975075	0.898305	0.0628116	0.0388833	0.409771	0.427717	0.0957129	0.10668	0.575274	0.27318	0.0697906	0.47657	0.97009	0.97009	0.401795	0.321037	1	0.0249252	0.374875	0.526421	0.341974	0.667996	0.0967099	0.430708	0.750748	0.448654	0.0897308	0.74676	0.774676	0.270189	0.127617	0.805583	0.570289	0.162512
*	TAA	N/A	N/A	N/A	N/A	N/A	N/A	N/A	N/A	N/A	N/A	N/A	N/A	N/A	N/A	N/A	N/A	N/A	N/A	N/A	N/A	N/A	N/A	N/A	N/A	N/A	N/A	N/A	N/A	N/A	N/A	N/A	N/A	N/A	N/A	N/A	N/A	N/A	N/A	N/A	N/A	N/A	N/A	N/A	N/A	N/A	N/A	N/A	N/A
*	TAG	N/A	N/A	N/A	N/A	N/A	N/A	N/A	N/A	N/A	N/A	N/A	N/A	N/A	N/A	N/A	N/A	N/A	N/A	N/A	N/A	N/A	N/A	N/A	N/A	N/A	N/A	N/A	N/A	N/A	N/A	N/A	N/A	N/A	N/A	N/A	N/A	N/A	N/A	N/A	N/A	N/A	N/A	N/A	N/A	N/A	N/A	N/A	N/A
C	TGC	0.546361	0.813559	0.41675	0.522433	0.586241	0.97009	0.667996	0.0618146	0.433699	0.184447	0.794616	0.58325	0.521436	0.832502	0.735793	0.257228	0.62014	0.325025	0.628116	0.302094	0.302094	0.565304	0.925224	0.675972	0.303091	0.0289133	0.973081	0.991027	0.341974	0.440678	0.875374	0.275174	0.398804	0.979063	0.19342	0.212363	0.45663	0.407777	0.848455	0.397807	0.378863	0.839482	0.40678	0.309073	0.6999	0.327019	0.0428714	0.131605
C	TGT	0.981057	0.7667	0.127617	0.342971	0.773679	0.336989	0.0588235	0.455633	0.670987	0.44666	0.226321	0.22333	0.662014	0.710867	0.759721	0.491525	0.667996	0.694915	0.95015	0.419741	0.671984	0.308076	0.625125	0.702891	0.464606	0.579262	0.999003	0.919242	0.24327	0.291127	0.964108	0.704885	0.613161	0.0169492	0.461615	0.999003	0.00498504	0.225324	0.799601	0.0558325	0.904287	0.133599	0.276171	0.887338	0.997009	0.484546	0.824526	0.537388
*	TGA	N/A	N/A	N/A	N/A	N/A	N/A	N/A	N/A	N/A	N/A	N/A	N/A	N/A	N/A	N/A	N/A	N/A	N/A	N/A	N/A	N/A	N/A	N/A	N/A	N/A	N/A	N/A	N/A	N/A	N/A	N/A	N/A	N/A	N/A	N/A	N/A	N/A	N/A	N/A	N/A	N/A	N/A	N/A	N/A	N/A	N/A	N/A	N/A
W	TGG	0.797607	0.647059	0.371884	0.410768	0.55334	0.148554	0.381854	0.492522	0.2333	0.815553	0.506481	0.705882	0.268195	0.418744	0.196411	0.0149551	0.18345	0.248255	0.333001	0.0259222	0.194417	0.0987039	0.856431	0.978066	0.171486	0.715852	1	1	0.864407	0.493519	0.996012	0.599202	0.186441	0.0707876	0.248255	0.0119641	0.955135	0.295115	0.997009	0.453639	0.26321	0.000997009	0.9332	0.812562	0.442672	0.291127	0.945165	0.333998
T	ACC	0.0378863	0.554337	0.0109671	0.247258	0.135593	0.531406	0.656032	0.551346	0.0229312	0.748754	0.124626	0.804586	0.619143	0.412762	0.780658	0.225324	0.0697906	0.911266	0.693918	0.587238	0.447657	0.226321	0.21336	0.375872	0.00199402	0.482552	1	0.998006	0.733799	0.259222	1	0.0987039	0.981057	0.240279	0.0697906	0.385842	0.0289133	0.435693	0.803589	0.631107	0.129611	0.0837488	0.531406	0.12662	0.366899	0.20339	0.0149551	0.0857428
T	ACT	0.97009	0.113659	0.817547	0.721834	0.644068	0.825523	0.115653	0.984048	0.17348	0.534397	0.666999	0.141575	0.75673	0.266201	0.667996	0.412762	0.99003	0.839482	0.695912	0.449651	0.154536	0.370887	0.44666	0.435693	0.188435	0.368893	1	0.988036	0.49651	0.880359	0.986042	0.0129611	0.167498	0.552343	0.811565	0.0249252	0.0598205	0.129611	0.752742	0.930209	0.431705	0.410768	0.392822	0.267198	0.26321	0.104686	0.408774	0
T	ACA	0.92323	0.790628	0.896311	0.19342	0.605184	0.0229312	0.860419	0.840479	0.338983	0.671984	0.103689	0.111665	0.209372	0.963111	0.402792	0.632104	0.412762	0.754736	0.918245	0.52343	0.569292	0.419741	0.192423	0.402792	0.80658	0.22333	1	1	0.685942	0.72682	0.999003	0.0667996	0.109671	0.281157	0.860419	0.581256	0.464606	0.407777	0.333001	0.483549	0.388833	0.138584	0.661017	0.710867	0.222333	0.0827517	0.969093	0.302094
T	ACG	0.376869	0.889332	0.449651	0.827517	0.924227	0.0807577	0.0628116	0.0348953	0.0159521	0.0169492	0.0329013	0.133599	0.230309	0.219342	0.837488	0.566301	0.529412	0.519442	0.424726	0.551346	0.558325	0.63011	0.827517	0.475573	0.967099	0.387836	1	1	0.497507	0.52343	1	0.154536	0.499501	0.432702	0.0847458	0.437687	0.649053	0.0458624	0.744766	0.101695	0.000997009	0.00697906	0.940179	0.389831	0.0358923	0.000997009	0.688933	0.00199402
I	ATC	0.424726	0.611167	0.0458624	0.388833	0.353938	0.876371	0.910269	0.505484	0.666999	0.0299103	0.344965	0.464606	0.150548	0.282154	0.541376	0.143569	0.698903	0.402792	0.999003	0.848455	0.118644	0.832502	0.432702	0.829511	0.578265	0.200399	0.999003	0.838485	0.101695	0.0737787	0.867398	0.13659	0.644068	0.402792	0.0239282	0.460618	0.20339	0.124626	0.279163	0.494516	0.000997009	0.0458624	0.493519	0.967099	0.119641	0.00299103	0.750748	0.135593
I	ATT	0.898305	0.568295	0.172483	0.949153	0.499501	0.670987	0.655035	0.86341	0.852443	0.441675	0.297109	0.443669	0.0348953	0.576271	0.0987039	0.0468594	0.470588	0.541376	0.1665	0.29013	0.219342	0.333001	0.62014	0.524427	0.117647	0.430708	1	1	0.592223	0.144566	1	0.00498504	0.639083	0.200399	0.309073	0.585244	0.398804	0.318046	0.592223	0.629113	0.254237	0.333001	0.0558325	0.417747	0.0279163	0.289133	0.427717	0.356929
I	ATA	0.781655	0.927218	0.12662	0.269192	0.444666	0.50349	0.684945	0.522433	0.723829	0.765703	0.127617	0.180459	0.477567	0.0458624	0.181456	0.318046	0.0967099	0.770688	0.656032	0.615155	0.727817	0.589232	0.551346	0.383848	0.449651	0.256231	1	1	0.134596	0.594217	0.492522	0.174477	0.102692	0.539382	0.67996	0.266201	0.499501	0.309073	0.0239282	0.134596	0.399801	0.0368893	0.391825	0.0847458	0.629113	0.216351	0.112662	0.0269192
M	ATG	0.994018	0.63011	0.0179462	0.167498	0.680957	0.538385	0.71984	0.00997009	0.00299103	0.0787637	0.0827517	0.0299103	0.18345	0.0997009	0.36989	0.0139581	0.608175	0.397807	0.385842	0.0209372	0.0368893	0	0.0697906	0.0947159	0.964108	0.13659	1	0.979063	0.184447	0.214357	0.998006	0	0.0119641	0.0867398	0.0448654	0.00199402	0.0159521	0.0209372	0.0119641	0.0259222	0.565304	0.0817547	0	0.0578265	0.0418744	0.00299103	0.17348	0.153539
N	AAC	0.144566	0.490528	0.00897308	0.461615	0.690927	0.99003	0.639083	0.274177	0.829511	0.524427	0.459621	0.19342	0.662014	0.930209	0.705882	0.81655	0.123629	0.908275	0.118644	0.238285	0.333001	0.407777	0.227318	0.528415	0.727817	0.858425	1	0.98006	0.187438	0.447657	1	0.00997009	0.389831	0.324028	0.914257	0.366899	0.289133	0.635095	0.772682	0.352941	0.501496	0.517448	0.56331	0.740778	0.299103	0.516451	0.525424	0.132602
N	AAT	0.929212	0.643071	0.360917	0.526421	0.160518	0.295115	0.939182	0.579262	0.722832	0.389831	0.66999	0.577268	0.450648	0.717846	0.828514	0.596211	0.818544	0.641077	0.957129	0.757727	0.959123	0.716849	0.885344	0.693918	0.284148	0.299103	0.99003	0.968096	0.631107	0.283151	0.779661	0.276171	0.549352	0.790628	0.707876	0.356929	0.0358923	0.199402	0.467597	0.579262	0.532403	0.695912	0.487537	0.0518445	0.0727817	0.930209	0.440678	0.606181
K	AAA	0.187438	0.956132	0.701894	0.234297	0.645065	0.319043	0.17348	0.0259222	0.589232	0.598205	0.733799	0.670987	0.194417	0.0568295	0.319043	0.289133	0.217348	0.65005	0.0797607	0.158524	0.376869	0.0309073	0.909272	0.572283	0.165503	0.160518	1	1	0.925224	0.694915	0.731805	0.250249	0.0997009	0.177468	0.131605	0.00897308	0.188435	0.0697906	0.891326	0.87338	0.982054	0.343968	0.92323	0.127617	0.589232	0.225324	0.434696	0.552343
K	AAG	0.884347	0.673978	0.635095	0.897308	0.119641	0.914257	0.491525	0.696909	0.587238	0.373878	0.270189	0.326022	0.208375	0.703888	0.427717	0.737787	0.433699	0.592223	0.740778	0.333998	0.841476	0.189432	0.343968	0.475573	0.0588235	0.752742	0.98006	0.941176	0.127617	0.947159	0.965105	0.0149551	0.0438684	0.356929	0.121635	0.831505	0.774676	0.477567	0.0687936	0.0319043	0.305085	0.286142	0.686939	0.67996	0.642074	0.152542	0.899302	0.195414
S	AGC	0.472582	0.705882	0.150548	0.788634	0.385842	0.720837	0.977069	0.150548	0.891326	0.914257	0.382851	0.452642	0.122632	0.197408	0.491525	0.748754	0.572283	0.505484	0.170489	0.370887	0.588235	0.0448654	0.712861	0.591226	0.0667996	0.544367	0.999003	0.995015	0.959123	0.19342	0.999003	0.187438	0.303091	0.961117	0.493519	0.479561	0.972084	0.915254	0.214357	0.0737787	0.894317	0.0249252	0.239282	0.527418	0.0747757	0.858425	0.257228	0.221336
S	AGT	0.985045	0.558325	0.747757	0.285145	0.911266	0.178465	0.878365	0.954138	0.801595	0.707876	0.602193	0.500499	0.700897	0.185444	0.39681	0.760718	0.501496	0.341974	0.255234	0.587238	0.541376	0.8335	0.387836	0.0827517	0.438684	0.341974	1	1	0.222333	0.378863	0.994018	0.999003	0.632104	0.341974	0.547358	0.245264	0.551346	0.239282	0.566301	0.258225	0.884347	0.81655	0.0299103	0.751745	0.875374	0.548355	0.721834	0.822532
R	AGA	0.802592	0.418744	0.818544	0.49651	0.202393	0.541376	0.0179462	0.801595	0.818544	0.29013	0.868395	0.292124	0.770688	0.353938	0.609172	0.612164	0.692921	0.878365	0.0967099	0.864407	0.268195	0.793619	0.420738	0.308076	0.42672	0.0488534	0.996012	0.999003	0.291127	0.226321	1	0.189432	0.407777	0.373878	0.823529	0.133599	0.694915	0.648056	0.439681	0.817547	0.559322	0.384845	0.606181	0.886341	0.400798	0.927218	0.799601	0.333998
R	AGG	0.531406	0.264207	0.827517	0.804586	0.700897	0.852443	0.999003	0.702891	0.712861	0.179462	0.207378	0.00199402	0.00598205	0.169492	0.377866	0.0418744	0.494516	0.0947159	0.0887338	0.000997009	0.63011	0.307079	0.360917	0.471585	0.198405	0.0109671	1	0.996012	0.323031	0.398804	0.961117	0.0757727	0.544367	0.0239282	0.159521	0.909272	0.720837	0	0.0129611	0.32004	0.322034	0.0388833	0.969093	0.0917248	0.962114	0.226321	0.939182	0
A	GCC	0.268195	0.431705	0.210369	0.955135	0.632104	0.987039	0.96012	0.755733	0.121635	0.764706	0.656032	0.00299103	0.795613	0.293121	0.443669	0.0827517	0.691924	0.948156	0.0458624	0.580259	0.0508475	0.536391	0.483549	0.0727817	0.1665	0.834497	1	1	0.939182	0.994018	1	0.00498504	0.364905	0.108674	0.835494	0.0618146	0.207378	0.576271	0.805583	0.0199402	0.361914	0.00398804	0.0338983	0.246261	0.748754	0.642074	0.337986	0.972084
A	GCT	0.33998	0.545364	0.182453	0.500499	0.924227	0.764706	0.961117	0.576271	0.281157	0.301097	0.600199	0.484546	0.783649	0.404786	0.407777	0.36989	0.778664	0.311067	0.326022	0.292124	0.335992	0.918245	0.328016	0.474576	0.665005	0.284148	0.987039	1	0.848455	0.72682	1	0.245264	0.187438	0.678963	0.684945	0.250249	0.271186	0.267198	0.413759	0.153539	0.333001	0.760718	0.0269192	0.0638086	0.224327	0.345962	0.0687936	0.54337
A	GCA	0.731805	0.84347	0.743769	0.770688	0.12662	0.967099	0.962114	0.920239	0.337986	0.857428	0.0717846	0.413759	0.509472	0.739781	0.584247	0.22333	0.222333	0.608175	0.728814	0.757727	0.80658	0.79661	0.882353	0.140578	0.63011	0.613161	1	0.999003	0.514457	0.0508475	1	0.401795	0.254237	0.0687936	0.437687	0.102692	0.659023	0.0229312	0.0368893	0.163509	0.303091	0.00598205	0.143569	0.628116	0.800598	0.452642	0.522433	0.74676
A	GCG	0.336989	0.839482	0.313061	0.793619	0.695912	0.862413	0.97009	0.264207	0.85344	0.0887338	0.317049	0.759721	0.0269192	0.114656	0.0867398	0.0937188	0.52343	0.0109671	0.860419	0.838485	0.562313	0.0687936	0.900299	0.137587	0.683948	0.0329013	1	1	0.815553	0.848455	1	0.191426	0.989033	0.234297	0.973081	0.904287	0.135593	0.877368	0.319043	0.457627	0.28016	0.453639	0.867398	0.205384	0.0528415	0.983051	0.504487	0.681954
V	GTC	0.697906	0.795613	0.196411	0.702891	0.608175	0.937188	0.798604	0.508475	0.19342	0.774676	0.848455	0.0917248	0.26321	0.852443	0.100698	0.204387	0.202393	0.609172	0.866401	0.956132	0.643071	0.937188	0.178465	0.0568295	0.0269192	0.847458	1	0.992024	0.306082	0.502493	0.999003	0.526421	0.104686	0.522433	0.855434	0.668993	0.119641	0.0767697	0.460618	0.454636	0.668993	0.554337	0.763709	0.713858	0.919242	0.307079	0.321037	0.54337
V	GTT	0.898305	0.572283	0.764706	0.609172	0.702891	0.612164	0.0628116	0.908275	0.715852	0.773679	0.759721	0.352941	0.294118	0.188435	0.770688	0.0408774	0.817547	0.0907278	0.546361	0.306082	0.698903	0.693918	0.81655	0.461615	0.12662	0.00299103	0.922233	1	0.366899	0.41675	0.968096	0.00498504	0.87338	0.115653	0.344965	0.0727817	0.804586	0.458624	0.271186	0.797607	0.175474	0.49651	0.737787	0.00897308	0.259222	0.822532	0.249252	0.617149
V	GTA	0.815553	0.352941	0.765703	0.813559	0.71984	0.925224	0.550349	0.351944	0.452642	0.31007	0.152542	0.117647	0.14656	0.779661	0.0757727	0.00697906	0.00997009	0.645065	0.79661	0.192423	0.282154	0.0109671	0.198405	0.764706	0.516451	0.0528415	1	1	0.47657	0.284148	0.983051	0.134596	0.7667	0.188435	0.149551	0.598205	0.340977	0.274177	0.616152	0.269192	0.0807577	0.355932	0.435693	0.153539	0.103689	0.499501	0.0129611	0.322034
V	GTG	0.321037	0.852443	0.735793	0.17348	0.0438684	0.643071	0.673978	0.698903	0.688933	0.308076	0.00199402	0.862413	0.0189432	0.517448	0.641077	0.376869	0.314058	0.874377	0.508475	0.0358923	0.394816	0.504487	0.259222	0.0139581	0.825523	0.354935	0.998006	0.916251	0.692921	0.741775	1	0.00697906	0.179462	0.0159521	0.316052	0.278166	0.218345	0.270189	0.100698	0.54337	0.34995	0.24327	0.000997009	0.0139581	0.808574	0.0438684	0.20339	0.143569
D	GAC	0.504487	0.114656	0.0658026	0.837488	0.477567	0.848455	0.878365	0.730808	0.381854	0.241276	0.288136	0.191426	0.625125	0.314058	0.182453	0.3001	0.788634	0.965105	0.678963	0.991027	0.440678	0.729811	0.781655	0.717846	0.177468	0.917248	1	0.995015	0.754736	0.341974	0.983051	0.195414	0.66999	0.139581	0.0628116	0.8335	0.497507	0.187438	0.887338	0.281157	0.794616	0.716849	0.655035	0.987039	0.472582	0.890329	0.705882	0.890329
D	GAT	0.791625	0.632104	0.718843	0.823529	0.809571	0.555334	1	0.965105	0.655035	0.812562	0.698903	0.537388	0.0398804	0.0528415	0.986042	0.966102	0.362911	0.85344	0.296112	0.88335	0.373878	0.0977069	0.952144	0.33998	0.1665	0.485543	0.999003	1	0.845464	0.163509	0.491525	0.248255	0.468594	0.80658	0.599202	0.427717	0.678963	0.715852	0.271186	0.586241	0.814556	0.489531	0.835494	0.942173	0.229312	0.532403	0.161515	0.474576
E	GAA	0.79661	0.737787	0.482552	0.376869	0.772682	0.404786	0.810568	0.291127	0.117647	0.701894	0.899302	0.82652	0.100698	0.801595	0.79661	0.0428714	0.540379	0.0977069	0.0458624	0.813559	0.675972	0.953141	0.989033	0.390828	0.408774	0.44666	0.997009	0.999003	0.143569	0.618146	0.999003	0.00398804	0.537388	0.21336	0.635095	0.351944	0.237288	0.724826	0.694915	0.218345	0.896311	0.675972	0.516451	0.284148	0.362911	0.229312	0.528415	0.579262
E	GAG	0.104686	0.989033	0.34995	0.0139581	0.204387	0.0608175	0.381854	0.659023	0.694915	0.114656	0.703888	0.926221	0.478564	0.997009	0.811565	0.97009	0.964108	0.876371	0.95015	0.981057	0.882353	0.215354	0.684945	0.368893	0.711864	0.68993	0.74676	0.968096	0.188435	0.591226	0.993021	0.0408774	0.143569	0.527418	0.0927218	0.337986	0.629113	0.974078	0.753739	0.852443	0.0937188	0.572283	0.986042	0.0568295	0.514457	0.949153	0.267198	0.236291
G	GGC	0.498504	0.654038	0.152542	0.337986	0.894317	0.666002	0.96012	0.703888	0.861416	0.374875	0.49651	0.219342	0.210369	0.962114	0.781655	0.0897308	0.123629	0.63011	0.296112	0.0408774	0.172483	0.985045	0.86341	0.613161	0.0987039	0.314058	1	1	0.127617	0.671984	1	0.0239282	0.169492	0.518445	0.871386	0.98006	0.257228	0.792622	0.0667996	0.43669	0.207378	0.986042	0.0508475	0.773679	0.215354	0.952144	0.902293	0.550349
G	GGT	0.639083	0.434696	0.28016	0.266201	0.607178	0.907278	0.997009	0.48654	0.527418	0.716849	0.764706	0.143569	0.377866	0.0687936	0.916251	0.0997009	0.99003	0.577268	0.769691	0.482552	0.0528415	0.91326	0.617149	0.613161	0.851446	0.530409	1	1	0.0189432	0.769691	1	0.730808	0.150548	0.477567	0.901296	0.687936	0.825523	0.207378	0.322034	0.274177	0.638086	0.529412	0.942173	0.450648	0.355932	0.397807	0.901296	0.767697
G	GGA	0.979063	0.391825	0.328016	0.541376	0.664008	0.909272	0.922233	0.935194	0.794616	0.449651	0.999003	0.277168	0.878365	0.984048	0.649053	0.399801	0.294118	0.432702	0.556331	0.986042	0.354935	0.277168	0.966102	0.793619	0.37986	0.753739	1	0.976072	0.341974	0.991027	0.996012	0.0528415	0.365902	0.80658	0.314058	0.441675	0.953141	0.0309073	0.619143	0.614158	0.674975	0.935194	0.102692	0.876371	0.881356	0.868395	0.517448	0.529412
G	GGG	0.158524	0.336989	0.108674	0.241276	0.676969	0.698903	0.768694	0.8335	0.0418744	0.619143	0.597208	0.50349	0.387836	0.613161	0.0458624	0	0.121635	0.00697906	0.0937188	0.325025	0.442672	0.609172	0.194417	0.0578265	0.244267	0.938185	0.997009	1	0.888335	0.0319043	0.528415	0.00498504	0.0747757	0.232303	0.0209372	0.234297	0.467597	0.392822	0.271186	0.938185	0.164506	0.222333	0.0348953	0.178465	0.727817	0.986042	0.0179462	0.0368893
[truncated: 214 more columns]

## Sheet: Aminoacid heatmap
Stop efficiency at the corresponging amino acid residue in the -2nd position while mRNA codon with specified index number is located in the P-site												Stop efficiency at the corresponging amino acid residue in the E-site while mRNA codon with specified index number is located in the P-site												Stop efficiency at the corresponging amino acid residue in the P-site while mRNA codon with specified index number is located in the P-site												Stop efficiency at the corresponging amino acid residue in the A-site while mRNA codon with specified index number is located in the P-site												Stop efficiency at the corresponging amino acid residue in the 2nd position while mRNA codon with specified index number is located in the P-site
-2	Index number of mRNA codon located in the P-site											E	Index number of mRNA codon located in the P-site											P	Index number of mRNA codon located in the P-site											A	Index number of mRNA codon located in the P-site											2	Index number of mRNA codon located in the P-site
	4	5	6	7	8	9	10	11	12	13			3	4	5	6	7	8	9	10	11	12			2	3	4	5	6	7	8	9	10	11			1	2	3	4	5	6	7	8	9	10			1
W	-0.00955343	-0.0143826	-0.00577654	-0.0219698	-0.0143553	-0.0075984	-0.00974516	-0.0100641	-0.00935985	-0.00998755		W	-0.00507882	-0.0236272	-0.020224	-0.00645167	-0.0246584	-0.0145912	-0.0118403	-0.00837813	-0.0134395	-0.0071681		W	0.0128431	-0.0055715	-0.0189087	-0.0231924	-0.00477989	-0.0148842	-0.017346	-0.00730554	-0.0100889	-0.0166917		W	0.24837	0.0401086	-0.0020502	-0.00246345	-0.0125782	0.00249227	-0.00921908	-0.00512407	-0.00152525	0.00258156		W	0.23404
Y	-0.0169081	-0.00984619	-0.0171914	-0.02293	-0.0153117	-0.0144811	-0.011126	-0.00711834	-0.0123511	-0.00745353		Y	-0.00498241	-0.0126816	-0.0146022	-0.0129733	-0.0232344	-0.018886	-0.0157447	-0.0105238	-0.00968752	-0.0126657		Y	0.0319229	-0.0102308	-0.0210616	-0.0128647	-0.0104326	-0.0323508	-0.0185049	-0.014437	-0.00543716	-0.0119954		Y	0.243311	0.0406501	-0.00666128	-0.0193072	-0.0153191	-0.00333818	-0.0229466	-0.0242371	-0.0131869	-0.0114791		Y	0.25367
F	-0.0217057	-0.0195957	-0.0176207	-0.0304163	-0.0176169	-0.0161308	-0.0157393	-0.019434	-0.0078554	-0.00871311		F	-0.0060035	-0.0118138	-0.0128211	-0.014271	-0.0282762	-0.0137237	-0.00887083	-0.0131493	-0.0114882	-0.0094097		F	0.0228255	-0.000785369	-0.0245155	-0.0208947	-0.0164843	-0.0159045	-0.0187572	-0.0151027	-0.0234083	-0.0130693		F	0.245804	0.0331241	-0.0125594	-0.0187069	-0.0118401	-0.00911173	-0.0243717	-0.0150064	-0.0148153	-0.0155058		F	0.233644
I	-0.0197888	-0.0143518	-0.0180754	-0.0219771	-0.0164349	-0.0155456	-0.0129192	-0.0172771	-0.0101852	-0.0120316		I	-0.00813172	-0.0190854	-0.0192099	-0.0120613	-0.0228453	-0.0191665	-0.0133129	-0.0072019	-0.00522557	-0.011533		I	0.0221626	-0.00756949	-0.0133575	-0.0112991	-0.0144941	-0.0187452	-0.0171088	-0.0139883	-0.0104572	-0.012463		I	0.272796	0.027957	-0.00558544	-0.0141776	-0.0144973	-0.014501	-0.0184083	-0.0160135	-0.00979907	-0.0124269		I	0.270306
L	-0.0188827	-0.0119773	-0.0143315	-0.0207219	-0.0194326	-0.0136563	-0.0135351	-0.010844	-0.0125132	-0.0135321		L	-0.00465854	-0.0126652	-0.0130647	-0.00648907	-0.0187193	-0.0187578	-0.0144562	-0.0105746	-0.00727474	-0.0102551		L	0.0234523	-0.00565105	-0.0186762	-0.0131694	-0.0116746	-0.0243766	-0.0177624	-0.0110973	-0.0114427	-0.0115752		L	0.23661	0.01188	-0.0154236	-0.0257764	-0.0210616	-0.0181017	-0.0283612	-0.0212061	-0.0148973	-0.016458		L	0.239829
V	-0.0208548	-0.015379	-0.0113676	-0.024722	-0.0181331	-0.0156757	-0.0156256	-0.00802357	-0.0153118	-0.009372		V	-0.0126344	-0.0211932	-0.0159838	-0.0146843	-0.0229539	-0.0201072	-0.0103824	-0.00867175	-0.0132568	-0.0127413		V	0.0158725	-0.00674686	-0.016607	-0.0108368	-0.0130128	-0.0200902	-0.0154715	-0.00829822	-0.0115669	-0.00884555		V	0.260265	0.0285549	-0.00534969	-0.0174768	-0.0178388	-0.00798558	-0.0200809	-0.0153341	-0.00971394	-0.013795		V	0.267828
M	-0.0124781	-0.0152471	-0.0080334	-0.0215852	-0.0184469	-0.0101153	-0.020704	-0.00306415	-0.0137256	-0.0180453		M	0.00249966	-0.0126951	-0.0162571	-0.0066075	-0.0256987	-0.0134685	-0.0131322	-0.00391983	-0.00599603	-0.0158297		M	0.111346	0.00608657	-0.00802856	-0.00248811	0.00464125	-0.0197024	-0.00577862	-0.00619163	-0.00293353	-0.00336634		M	0.205343	0.010155	-0.00568487	-0.00472135	-0.00690227	-0.00231197	-0.0258106	-0.0201734	-0.0092773	-0.0187768		M	0.260144
A	-0.0200365	-0.0169269	-0.0166185	-0.0215525	-0.019085	-0.0153415	-0.0128704	-0.0104631	-0.0103308	-0.00847168		A	-0.0115024	-0.0220583	-0.018972	-0.0168215	-0.0229406	-0.0197883	-0.0146932	-0.0138122	-0.0116473	-0.0130923		A	0.0163757	-0.011333	-0.0174684	-0.0130166	-0.016746	-0.0227925	-0.0173184	-0.0136345	-0.0133191	-0.011201		A	0.262803	0.0327068	-0.00904831	-0.0129952	-0.0109914	-0.0107304	-0.0159721	-0.0142847	-0.00998746	-0.0105042		A	0.258675
T	-0.0181437	-0.0131329	-0.0125654	-0.0286654	-0.0175747	-0.0153679	-0.0166195	-0.0148834	-0.00947492	-0.00683368		T	-0.0104415	-0.0225767	-0.0115743	-0.0150404	-0.0241183	-0.0168593	-0.0132485	-0.0126887	-0.0136689	-0.0124127		T	0.0202893	-0.0056765	-0.0164141	-0.0125464	-0.0139359	-0.018437	-0.0169381	-0.0113841	-0.0128997	-0.0059352		T	0.288798	0.0363388	-0.00603241	-0.0144077	-0.0139223	-0.0114872	-0.0252762	-0.0201329	-0.0145555	-0.0103763		T	0.279517
S	-0.0224098	-0.0167766	-0.013935	-0.0221964	-0.0193893	-0.0137649	-0.0147694	-0.0152769	-0.00910413	-0.00862082		S	-0.0121194	-0.0190062	-0.017666	-0.013818	-0.026711	-0.0179354	-0.0141821	-0.0155746	-0.00961042	-0.012117		S	0.0125724	-0.00981017	-0.0208282	-0.0197362	-0.0122721	-0.0217436	-0.0158341	-0.0149674	-0.0110528	-0.0118773		S	0.270788	0.019271	-0.0138834	-0.0187097	-0.0171902	-0.0136761	-0.0187183	-0.0191246	-0.0124069	-0.0131698		S	0.264562
G	-0.0133625	-0.0140897	-0.00954744	-0.0184554	-0.0161021	-0.0106439	-0.0109259	-0.00512333	-0.00784512	-0.00531193		G	-0.00332177	-0.0199871	-0.0135661	-0.0119682	-0.0180773	-0.0179062	-0.0139778	-0.0107579	-0.00473398	-0.00576811		G	0.0156967	-0.0109654	-0.0198259	-0.0157456	-0.0110813	-0.0237242	-0.0179431	-0.0147733	-0.00932954	-0.00947125		G	0.237805	0.0214958	-0.00496277	-0.0158334	-0.00987925	-0.0102477	-0.0213471	-0.0141677	-0.0113738	-0.0134802		G	0.259963
P	-0.0191562	-0.0151169	-0.0122452	-0.0209504	-0.0151631	-0.0137197	-0.0124112	-0.0115423	-0.0132623	-0.00907312		P	-0.0130322	-0.022276	-0.0227921	-0.0157777	-0.0279328	-0.0239629	-0.0229241	-0.0211303	-0.0170219	-0.0121393		P	0.0162472	-0.014062	-0.0300531	-0.0275655	-0.0166617	-0.0350704	-0.0300071	-0.0260548	-0.0221707	-0.0142038		P	0.231094	0.016623	-0.01173	-0.0225281	-0.0174983	-0.0158149	-0.0309074	-0.0252072	-0.0218461	-0.0178181		P	0.205272
Q	-0.0269397	-0.0141756	-0.00835954	-0.0167211	-0.0177595	-0.0128258	-0.0172093	-0.0152987	-0.0083685	-0.0146427		Q	-0.00718073	-0.021006	-0.0113815	-0.0123352	-0.0210776	-0.0194307	-0.00691477	-0.0076933	-0.0102059	-0.0132902		Q	0.0317204	-0.00802406	-0.00885521	-0.00541016	-0.0131374	-0.0229261	-0.0136599	-0.0128041	-0.00961653	-0.010157		Q	0.300567	0.0313615	-0.00730374	-0.0167756	-0.0159258	-0.0122671	-0.0199868	-0.0186513	-0.0121965	-0.0124406		Q	0.295172
N	-0.0195408	-0.0123744	-0.019236	-0.0179272	-0.0236016	-0.0143253	-0.00893911	-0.0206442	-0.0178576	-0.0114633		N	-0.00720577	-0.0162654	-0.0163696	-0.0140212	-0.021334	-0.018117	-0.0144046	-0.0101789	-0.00508569	-0.0113645		N	0.0174115	-0.0127733	-0.0235161	-0.0126948	-0.0180191	-0.0214951	-0.0155979	-0.00950965	-0.0162201	-0.0179485		N	0.300754	0.0375876	0.00400792	-0.0163829	-0.0101356	-0.0123818	-0.0253351	-0.0219465	-0.0111272	-0.0165588		N	0.30136
H	-0.0151142	-0.0142529	-0.0130008	-0.0202286	-0.0211815	-0.0111878	-0.0138266	-0.0137655	-0.0107869	-0.00614227		H	-0.0038681	-0.0208824	-0.010718	-0.0121945	-0.0189748	-0.0173695	-0.0127215	-0.0133201	-0.0152086	-0.0124579		H	0.0361843	-0.00706642	-0.0153666	-0.0180097	-0.0131453	-0.0269789	-0.0203817	-0.0151017	-0.0116253	-0.0172899		H	0.284113	0.0337391	-0.00959027	-0.0175936	-0.0184477	-0.0171512	-0.0221227	-0.0179046	-0.017805	-0.0137869		H	0.275466
C	-0.0146938	-0.0217708	-0.00450471	-0.0281138	-0.0205099	-0.0145165	-0.0151763	-0.0134053	-0.01423	-0.00812049		C	-0.0123117	-0.0193322	-0.0175593	-0.0106521	-0.0201922	-0.0149691	-0.0129908	-0.0147914	-0.00957597	-0.0104729		C	0.0160012	-0.00779591	-0.0204783	-0.0194173	-0.00667154	-0.0193133	-0.0200573	-0.00833268	-0.0151716	-0.0141833		C	0.276815	0.0310972	-0.0145042	-0.0207958	-0.0229152	-0.0099831	-0.0272579	-0.0191977	-0.0163963	-0.0113277		C	0.267271
K	-0.0175	-0.0182005	-0.0151431	-0.0215944	-0.020929	-0.0204922	-0.0122126	-0.00714249	-0.0136142	-0.0121263		K	-0.0103226	-0.0155009	-0.0132691	-0.00755165	-0.0255849	-0.0181921	-0.00679537	-0.0107318	-0.0160375	-0.000139775		K	0.0118027	-0.00581091	-0.0162988	-0.0191325	-0.0183778	-0.0232618	-0.0132673	-0.00941541	-0.00967289	-0.011561		K	0.304948	0.0326652	-0.00281476	-0.0150621	-0.0087611	-0.0109536	-0.0318902	-0.0143232	-0.0124179	-0.0129412		K	0.296846
R	-0.0173039	-0.0168662	-0.0110417	-0.0236156	-0.0200412	-0.0145714	-0.0115113	-0.0103244	-0.0134606	-0.00839953		R	-0.011484	-0.0152821	-0.00969828	-0.0125874	-0.0203309	-0.0140021	-0.010976	-0.0111852	-0.0131848	-0.01516		R	0.0229592	-0.0103393	-0.0157052	-0.0122082	-0.0112129	-0.0208368	-0.0181503	-0.0110782	-0.0148233	-0.0116078		R	0.260542	0.0210733	-0.00604974	-0.0181462	-0.0111405	-0.0123194	-0.0215667	-0.0168404	-0.0143684	-0.01261		R	0.251714
E	-0.0289185	-0.0235332	-0.0164079	-0.0255097	-0.0184082	-0.0185398	-0.0138408	-0.0162828	-0.0111149	-0.00790112		E	-0.0131486	-0.0223866	-0.0208738	-0.0101778	-0.028669	-0.0208559	-0.0124708	-0.0142792	-0.0155205	-0.00877209		E	-0.00205817	-0.0218304	-0.022391	-0.0200951	-0.0192092	-0.0176108	-0.0151702	-0.0124079	-0.0079586	-0.00762489		E	0.316411	0.0143565	-0.0153977	-0.0174658	-0.0197098	-0.00337739	-0.00951612	-0.0136821	-0.0160445	-0.0100137		E	0.323581
D	-0.026393	-0.0232425	-0.0143603	-0.0408144	-0.0173422	-0.0193389	-0.0114432	-0.0078241	-0.00939209	-0.00455057		D	-0.0242181	-0.0285451	-0.027135	-0.0205675	-0.0312093	-0.0218473	-0.0179393	-0.0181575	-0.00963435	-0.0114438		D	0.00432967	-0.0200384	-0.0250646	-0.0241006	-0.0162901	-0.0199864	-0.0157096	-0.0136251	-0.0100715	-0.0153856		D	0.304006	0.0107417	-0.0146393	-0.0164196	-0.0190418	-0.019846	-0.0328236	-0.0169649	-0.0160645	-0.0126596		D	0.315918
*	0	0	0	0	0	0	0	0	0	0		*	0	0	0	0	0	0	0	0	0	0		*	0	0	0	0	0	0	0	0	0	0		*	0.0931219	-0.160099	-0.0668792	-0.095355	-0.0948766	-0.0656033	-0.0688146	-0.0507116	-0.0459006	-0.0291574		*	0.327879
[truncated: 8 more columns]

## Sheet: P-value for aminoacid heatmap
P-value for shuffled datasets exceeding experimental data of stop efficiency at the corresponging amino acid residue in the -2nd position while mRNA codon with specified index number is located in the P-site												P-value for shuffled datasets exceeding experimental data of stop efficiency at the corresponging amino acid residue in the E-site while mRNA codon with specified index number is located in the P-site												P-value for shuffled datasets exceeding experimental data of stop efficiency at the corresponging amino acid residue in the P-site while mRNA codon with specified index number is located in the P-site												P-value for shuffled datasets exceeding experimental data of stop efficiency at the corresponging amino acid residue in the A-site while mRNA codon with specified index number is located in the P-site												P-value for shuffled datasets exceeding experimental data of stop efficiency at the corresponging amino acid residue in the 2nd position while mRNA codon with specified index number is located in the P-site
-2	Index number of mRNA codon located in the P-site											E	Index number of mRNA codon located in the P-site											P	Index number of mRNA codon located in the P-site											A	Index number of mRNA codon located in the P-site											2	Index number of mRNA codon located in the P-site
	4	5	6	7	8	9	10	11	12	13			3	4	5	6	7	8	9	10	11	12			2	3	4	5	6	7	8	9	10	11			1	2	3	4	5	6	7	8	9	10			1
W	0.185259	0.494024	0.059761	0.477092	0.162351	0.00697211	0.169323	0.407371	0.326693	0.674303		W	0.101594	0.863546	0.834661	0.100598	0.7251	0.119522	0.207171	0.0567729	0.657371	0.120518		W	0.879482	0.143426	0.437251	0.953187	0.0408367	0.0547809	0.373506	0.00398406	0.170319	0.866534		W	0.835657	0	0.0258964	0	0.212151	0	0.00896414	0	0	0		W	0.994024
Y	0.293825	0.156375	0.881474	0.550797	0.24004	0.670319	0.323705	0.162351	0.651394	0.344622		Y	0.111554	0.106574	0.445219	0.517928	0.575697	0.625498	0.719124	0.248008	0.361554	0.662351		Y	0.0159363	0.656375	0.684263	0.242032	0.316733	0.946215	0.482072	0.5249	0.0149402	0.534861		Y	0.906375	0	0.207171	0.469124	0.399402	0.0408367	0.461155	0.936255	0.326693	0.268924		Y	0.64741
F	1	0.945219	0.900398	0.978088	0.558765	0.890438	0.767928	0.967131	0.143426	0.516932		F	1	0.0826693	0.2749	0.670319	0.905378	0.0996016	0.0408367	0.459163	0.51992	0.263944		F	0	0.00796813	0.912351	0.906375	0.811753	0.111554	0.494024	0.635458	0.999004	0.674303		F	0.704183	0.000996016	0.76992	0.420319	0.141434	0.182271	0.531873	0.10757	0.537849	0.739044		F	1
I	0.518924	0.448207	0.919323	0.580677	0.305777	0.814741	0.552789	0.953187	0.385458	0.910359		I	0.255976	0.551793	0.853586	0.466135	0.553785	0.728088	0.410359	0.0298805	0.0687251	0.528884		I	0.206175	0.271912	0.0756972	0.101594	0.658367	0.195219	0.312749	0.431275	0.182271	0.544821		I	0	0.0358566	0.100598	0.0717131	0.325697	0.613546	0.109562	0.153386	0.0398406	0.365538		I	0.0159363
L	0.999004	0.063745	0.782869	0.26992	0.899402	0.491036	0.625498	0.412351	0.7749	1		L	0.063745	0.00199203	0.11255	0.00298805	0.064741	0.678287	0.629482	0.0478088	0.0219124	0.202191		L	0.0109562	0.0109562	0.400398	0.0816733	0.268924	0.710159	0.350598	0.0059761	0.10259	0.535857		L	1	0.99502	0.996016	0.996016	0.987052	0.98008	0.971116	0.946215	0.600598	0.978088		L	1
V	0.675299	0.615538	0.318725	0.868526	0.527888	0.839641	0.89741	0.0846614	0.987052	0.661355		V	0.896414	0.838645	0.588645	0.787849	0.521912	0.846614	0.00796813	0.00498008	0.784861	0.787849		V	0.834661	0.0816733	0.151394	0.0169323	0.488048	0.158367	0.0438247	0	0.178287	0.138446		V	0.187251	0	0.0199203	0.205179	0.680279	0.0378486	0.13247	0.0268924	0.000996016	0.516932		V	0.00498008
M	0.116534	0.474104	0.251992	0.482072	0.623506	0.174303	0.950199	0.0986056	0.681275	0.97012		M	0.0119522	0.159363	0.604582	0.173307	0.706175	0.15239	0.418327	0.0368526	0.216135	0.77988		M	0	0.000996016	0.0298805	0.0109562	0.00199203	0.337649	0.000996016	0.0288845	0.0249004	0.0966135		M	1	0.879482	0.200199	0.0129482	0.0707171	0.061753	0.634462	0.626494	0.113546	0.837649		M	0.353586
A	0.577689	0.755976	0.977092	0.353586	0.839641	0.904382	0.401394	0.35757	0.244024	0.417331		A	0.792829	0.949203	0.946215	0.979084	0.526892	0.88745	0.713147	0.686255	0.526892	0.880478		A	0.868526	0.799801	0.133466	0.0557769	0.963147	0.40239	0.135458	0.277888	0.452191	0.419323		A	0.0249004	0	0.311753	0	0.000996016	0.0896414	0	0	0	0.0109562		A	0.213147
T	0.287849	0.166335	0.507968	0.994024	0.420319	0.861554	0.993028	0.939243	0.161355	0.131474		T	0.565737	0.918327	0.0498008	0.831673	0.690239	0.194223	0.320717	0.370518	0.86255	0.706175		T	0.381474	0.0328685	0.118526	0.0826693	0.600598	0.0458167	0.180279	0.0288845	0.389442	0.0189243		T	0	0	0.0557769	0.0189243	0.126494	0.226096	0.76494	0.770916	0.515936	0.0577689		T	0
S	0.915339	0.781873	0.766932	0.505976	0.928287	0.487052	0.876494	0.988048	0.0577689	0.4751		S	0.893426	0.554781	0.835657	0.712151	0.972112	0.442231	0.556773	0.952191	0.175299	0.712151		S	0.997012	0.542829	0.786853	0.98008	0.325697	0.265936	0.0169323	0.692231	0.0478088	0.584661		S	0	0.503984	0.989044	0.316733	0.656375	0.570717	0.0139442	0.576693	0.0249004	0.365538		S	0.0149402
G	0	0.215139	0.061753	0.0468127	0.0557769	0.000996016	0.0557769	0	0.0129482	0.00398406		G	0	0.702191	0.114542	0.331673	0.00896414	0.389442	0.424303	0.0358566	0	0		G	0.929283	0.76992	0.62251	0.452191	0.167331	0.598606	0.302789	0.635458	0	0.105578		G	1	0.176295	0	0.0169323	0	0.0557769	0.177291	0	0.00398406	0.440239		G	0.131474
P	0.37749	0.302789	0.374502	0.187251	0.00298805	0.409363	0.296813	0.638446	0.965139	0.684263		P	0.98506	0.9751	1	0.937251	0.997012	1	1	1	1	0.768924		P	0.926295	0.998008	1	1	0.98506	1	1	1	1	0.976096		P	1	0.907371	0.89243	0.969124	0.762948	0.914343	0.999004	1	1	1		P	1
Q	0.958167	0.323705	0.115538	0.0826693	0.440239	0.281873	0.951195	0.913347	0.158367	0.989044		Q	0.207171	0.776892	0.10757	0.454183	0.34761	0.694223	0.000996016	0.0149402	0.398406	0.731076		Q	0.00796813	0.258964	0.000996016	0.00199203	0.51992	0.441235	0.0169323	0.249004	0.101594	0.349602		Q	0	0.000996016	0.183267	0.24004	0.435259	0.379482	0.178287	0.465139	0.166335	0.34761		Q	0
N	0.503984	0.233068	0.971116	0.194223	0.976096	0.64243	0.0966135	0.974104	0.957171	0.786853		N	0.229084	0.26992	0.601594	0.626494	0.380478	0.543825	0.560757	0.222112	0.0826693	0.503984		N	0.64243	0.833665	0.89243	0.208167	0.863546	0.384462	0.145418	0.0776892	0.750996	0.903386		N	0	0	0	0.219124	0.0697211	0.417331	0.641434	0.800797	0.145418	0.795817		N	0
H	0.0896414	0.375498	0.549801	0.280876	0.960159	0.0846614	0.633466	0.850598	0.462151	0.0856574		H	0.0258964	0.804781	0.0458167	0.443227	0.176295	0.400398	0.221116	0.502988	0.908367	0.705179		H	0	0.167331	0.110558	0.76494	0.513944	0.88247	0.810757	0.665339	0.242032	0.98008		H	0	0	0.429283	0.270916	0.73506	0.855578	0.312749	0.329681	0.922311	0.510956		H	0
C	0.996016	0.963147	0.0179283	0.937251	0.924303	0.63247	0.773904	0.753984	0.85259	0.409363		C	0.898406	0.606574	0.742032	0.282869	0.323705	0.0936255	0.332669	0.7251	0.308765	0.351594		C	0.765936	0.312749	0.650398	0.844622	0.0577689	0.154382	0.711155	0.000996016	0.736056	0.818725		C	0	0.00796813	0.917331	0.61255	0.963147	0.222112	0.791833	0.567729	0.792829	0.190239		C	0.0547809
K	0.297809	0.801793	0.738048	0.430279	0.815737	0.992032	0.452191	0.248008	0.716135	0.796813		K	0.530876	0.138446	0.256972	0.165339	0.697211	0.507968	0.00398406	0.282869	0.809761	0.0129482		K	0.917331	0.129482	0.222112	0.765936	0.881474	0.52988	0.0488048	0.0776892	0.206175	0.526892		K	0	0.00199203	0.0149402	0.182271	0.0348606	0.330677	0.934263	0.130478	0.286853	0.449203		K	0
R	0.063745	0.758964	0.186255	0.811753	0.976096	0.719124	0.0916335	0.284861	0.973108	0.356574		R	0.859562	0.00996016	0	0.447211	0.0826693	0	0.00298805	0.0478088	0.88745	0.999004		R	0.0388446	0.628486	0.00896414	0.0109562	0.13247	0.0756972	0.353586	0	0.850598	0.492032		R	0.0766932	0.194223	0.00498008	0.180279	0	0.249004	0.160359	0.0328685	0.442231	0.169323		R	0.918327
E	0.983068	0.994024	0.840637	0.7749	0.643426	0.973108	0.595618	0.907371	0.497012	0.405378		E	0.815737	0.881474	0.915339	0.248008	0.896414	0.849602	0.294821	0.634462	0.838645	0.200199		E	1	1	0.787849	0.845618	0.920319	0.0986056	0.116534	0.23506	0.0418327	0.187251		E	0	0.85259	0.953187	0.291833	0.794821	0.0119522	0.000996016	0.0438247	0.709163	0.123506		E	0
D	0.951195	0.988048	0.710159	1	0.421315	0.993028	0.256972	0.179283	0.262948	0.0338645		D	1	0.999004	0.999004	0.98008	0.964143	0.932271	0.955179	0.927291	0.317729	0.535857		D	0.996016	0.999004	0.950199	0.982072	0.790837	0.236056	0.101594	0.409363	0.11753	0.878486		D	0	0.965139	0.937251	0.198207	0.746016	0.944223	0.99004	0.241036	0.718127	0.350598		D	0
*	0	0	0	0	0	0	0	0.0059761	0.00199203	0.000996016		*	0	0	0	0	0	0	0	0	0.00498008	0		*	1	0	0	0	0	0	0	0	0	0.00199203		*	1	1	1	1	1	1	1	1	1	1		*	0
[truncated: 8 more columns]

## Sheet: Heatmap for aminoacids in sites
Stop efficiency at the corresponging amino acid residue while located in the ribosome sites							P-values for shuffled datasets exceeding experimental data of stop efficiency at the corresponging triplet while located in the ribosome sites
	Ribosome sites							Ribosome sites
	-2	E	P	A	2			-2	E	P	A	2
W	-0.0114507	-0.013692	-0.0100423	0.0315772	0.0256227		W	0.0229084	0.170319	0.196215	0	0.0498008
Y	-0.0133595	-0.013363	-0.00999401	0.0213563	0.039766		Y	0.250996	0.185259	0.177291	0.0119522	0.539841
F	-0.0179722	-0.0127675	-0.0105395	0.0287427	0.0213026		F	1	0.481076	0.163347	0.123506	0.848606
I	-0.0164589	-0.0136744	-0.00670254	0.0436559	0.0290433		I	0.899402	0.282869	0.0298805	0	0.000996016
L	-0.0150238	-0.011545	-0.00961945	0.0119576	0.0190947		L	0.968127	0	0.000996016	1	0.915339
V	-0.0154788	-0.0152651	-0.00913534	0.0207039	0.0289573		V	0.903386	0.782869	0.00199203	0	0
M	-0.0142916	-0.0113374	0.00990756	0.0174812	0.0298133		M	0.38745	0.0209163	0	0.917331	0.00697211
A	-0.0150954	-0.0164588	-0.0120734	0.019739	0.0187721		A	0.848606	0.999004	0.491036	0	0.00498008
T	-0.0156742	-0.0154309	-0.00989308	0.0194751	0.0191285		T	0.927291	0.73008	0.000996016	0	0
S	-0.0157456	-0.015862	-0.0123574	0.018974	0.0158404		S	0.971116	0.983068	0.868526	0.00498008	0.0507968
G	-0.0113487	-0.011922	-0.0111793	0.0210649	0.0241041		G	0	0	0.38745	0.10259	0
P	-0.0142958	-0.0199899	-0.0197489	0.00985287	0.0121804		P	0.158367	1	1	1	1
Q	-0.0151189	-0.0135805	-0.00806304	0.018322	0.0347208		Q	0.674303	0.0587649	0	0	0
N	-0.0165473	-0.0140391	-0.0129559	0.0298013	0.045528		N	0.925299	0.191235	0.830677	0	0
H	-0.0139223	-0.0138844	-0.0115188	0.0153078	0.0270772		H	0.270916	0.136454	0.172311	0	0
C	-0.015441	-0.0142129	-0.0109239	0.022378	0.0187331		C	0.987052	0.469124	0.419323	0.0298805	0.0109562
K	-0.0167296	-0.0133254	-0.0103578	0.0409462	0.0536307		K	0.853586	0.0458167	0.5	0	0
R	-0.0148263	-0.0133848	-0.0099564	0.019581	0.0192841		R	0.566733	0	0.000996016	0	0.0507968
E	-0.0187026	-0.0171215	-0.0154893	0.0215556	0.0432072		E	1	0.9751	0.991036	0	0
D	-0.017839	-0.0214283	-0.0160513	0.0156885	0.0348658		D	1	1	0.999004	0.110558	0
*	0	0	0	-0.0611677	0.0345914		*	0	0	0	1	0.684263

## Sheet: 2D aminoacid heatmap
2-dimensional representation of stalling propensities with the corresponding aminio acid residue located in the P- and A-sites																							2-dimensional representation of stalling propensities with the corresponding aminio acid residue located in the E- and A-sites																							2-dimensional representation of stalling propensities with the corresponding aminio acid residue located in the E- and P-sites
P\A	Amino acid residues located in the A-site																						E\A	Amino acid residues located in the A-site																						E\P	Amino acid residues located in the P-site
	W	Y	F	I	L	V	M	A	T	S	G	P	Q	N	H	C	K	R	E	D	*			W	Y	F	I	L	V	M	A	T	S	G	P	Q	N	H	C	K	R	E	D	*			W	Y	F
W	-0.00922451	0.00144161	0.00526987	-0.0336071	-0.0133674	-0.000774511	-0.00893908	-0.00798116	0.00120406	-0.00342387	-0.00300441	-0.0160991	-0.0165067	0.0188999	-0.0107172	-0.0186975	-0.0293804	-0.00865633	0.00726516	-0.00429117	-0.0877156		W	-0.0267472	-0.00316962	-0.00235696	-0.0202529	-0.0226505	-0.00523424	0.0133403	-0.0100502	-0.0116831	-0.0127447	-0.0128332	-0.0142704	-0.00215824	0.0032519	-0.0197599	-0.0231448	0.00915336	-0.0163617	-0.0245661	-0.024463	-0.0759927		W	-0.0117842	-0.0158882	-0.0176682
Y	0.0199436	0.0155227	0.00781138	-0.00492052	-0.0117782	-0.00119896	-0.0145584	-0.00585298	-0.0201226	-0.006848	-0.00843626	-0.0112849	-0.0170315	-0.000752772	-0.0117491	-0.00652261	-0.0050263	-0.0169739	0.00455751	-0.00607963	-0.068713		Y	-0.020043	-0.016021	-0.0225242	0.00386859	-0.013734	-0.0141083	-0.0181799	-0.0121523	-0.019618	-0.0156097	-0.01068	-0.0163848	-0.00530224	-0.0210532	-0.0128072	-0.0248772	-0.0220577	-0.00868895	-0.00100058	-0.0146603	-0.0434047		Y	0.00694388	-0.0275413	-0.00440463
F	0.0181837	0.0119005	0.00482898	-0.0107027	-0.0139762	0.00161115	-0.0059362	-0.0073317	-0.0136601	-0.0153181	-0.0078356	-0.0128451	-0.00694999	-0.00205377	0.00272289	-0.00542415	-0.00613586	-0.0119207	-0.00481562	-0.02146	-0.0775566		F	0.0115225	-0.00828816	-0.0140194	-0.0162575	-0.0152042	-0.0191867	-0.0312446	-0.00938725	-0.022285	-0.0120967	-0.0102948	-0.0163443	-0.0195878	-0.00596925	-0.00150398	-0.0186438	-0.0218508	-0.00967033	0.00157785	-0.0328336	-0.0398036		F	-0.0151845	-0.00330849	-0.00722308
I	0.0163535	0.01311	0.000765323	0.00994863	-0.0126345	-0.00364872	-0.00149365	-0.00803647	-0.0017035	-0.00965111	-0.0156394	-0.0118548	0.00558088	0.0265567	-0.00997479	0.00522625	0.0130608	0.00104892	-0.0056392	-0.0131715	-0.0901506		I	0.0126284	-0.0154916	-0.0196169	-0.00994616	-0.0176109	-0.0105821	-0.00233212	-0.00928748	-0.0121873	-0.0216935	-0.00952249	-0.0134608	-0.00180893	-0.00395488	-0.0138504	-0.0149512	-0.0107478	-0.0136588	-0.0213003	-0.0301352	-0.0968348		I	-0.0157229	-0.0129552	-0.000963468
L	0.00406101	-0.00532772	-0.0110646	-0.00567599	-0.0138305	-0.00764911	-0.00813156	-0.00420979	-0.00587669	-0.00929562	-0.00665407	-0.0116246	-0.00324613	-0.00289451	-0.00631226	-0.0136841	0.015956	-0.0117907	-0.00756189	-0.0124582	-0.0603262		L	0.00807463	-0.013051	-0.0169967	-0.0105669	-0.0175579	-0.0107923	-0.0150703	-0.0118295	-0.00764176	-0.0169122	-0.00886857	-0.0153543	-0.0114352	-0.00415488	-0.0136661	-0.00851212	-0.00870613	-0.0083087	-0.0063476	-0.0139013	-0.0507299		L	-0.00856113	-0.00753938	-0.0173456
V	0.00866519	0.00138708	-0.0129364	-0.00162057	-0.0114181	-0.0032618	-0.0135207	-0.00370597	-0.00658506	-0.011003	-0.00622608	-0.0153891	-0.00644476	-0.00472867	-0.0127817	-0.00989023	0.00426448	-0.00445675	-0.00727769	-0.0107193	-0.0827186		V	0.00534629	-0.0160484	-0.0160083	-0.0124808	-0.0199463	-0.0128175	-0.00638061	-0.011127	-0.0173253	-0.0123549	-0.0151025	-0.02198	-0.0176612	-0.0144361	-0.0161013	-0.0135635	-0.0122054	-0.0142038	-0.0128046	-0.00894761	-0.0776976		V	-0.0172288	-0.0174707	-0.0120827
M	0.0486682	-0.0178947	0.0366499	0.048026	-0.000203096	0.0262713	0.0296052	0.0164778	0.0292027	0.00716639	0.0145014	-0.0139262	0.0181246	0.0112349	0.0237115	0.00382388	0.0528085	0.00303706	0.00939689	0.0564993	-0.0958226		M	-0.0157658	-0.00695433	0.00734807	-0.00903447	-0.00520799	-0.00430545	-0.0497277	0.00609788	-0.0192704	-0.00838631	-0.0119958	-0.0189756	0.00711309	-0.0409943	-0.024262	0.00110027	-0.00492868	-0.00574895	-0.0133633	-0.0228642	-0.100188		M	-0.0142184	-0.00275334	-0.00398037
A	-0.00161679	-0.0107644	-0.0120427	-0.00796991	-0.0182058	-0.00882383	0.00250165	-0.00578963	-0.0127171	-0.0138201	-0.0047976	-0.0125578	-0.00588389	-0.00392191	-0.0105307	-0.0231942	-0.00205994	-0.0100041	-0.0133035	-0.0203007	-0.103921		A	-0.0059027	-0.0114313	-0.0157729	-0.0180112	-0.0192728	-0.0171267	-0.0157152	-0.0137559	-0.0150942	-0.0173555	-0.0130807	-0.0240388	-0.0123248	-0.00765682	-0.015648	-0.0212164	-0.0132848	-0.0147642	-0.0180366	-0.0226206	-0.081777		A	-0.0100112	-0.0204854	-0.0194084
T	0.00552639	-0.00453304	-0.00843381	-0.00377056	-0.012148	-0.0053198	-0.0171021	-0.00594123	-0.0109518	-0.0110173	-0.00742608	-0.0133887	0.00088675	0.0108252	-0.00208995	-0.0159066	-0.00853288	-0.0102162	-0.0133125	-0.00814174	-0.0986807		T	-0.0061323	-0.0115391	-0.0168821	-0.0199154	-0.0289937	-0.0165813	-0.00835567	-0.00433931	-0.0133988	-0.0155522	-0.0123033	-0.0188557	-0.0165342	-0.00725327	-0.0159751	-0.0105733	-0.0167729	-0.0156875	-0.0142772	-0.0106737	-0.0868104		T	-0.0139909	-0.010414	-0.0192975
S	0.00255527	0.00511099	-0.00976862	-0.0135848	-0.015277	-0.00787706	-0.00558493	-0.0100432	-0.00980379	-0.0158538	-0.00757574	-0.0126106	-0.0069167	-0.00691872	-0.0120319	-0.0125446	-0.0109669	-0.00987227	-0.00629017	-0.0222458	-0.0984201		S	-0.00990195	-0.0125276	-0.0082054	-0.0188177	-0.0193859	-0.0137308	-0.0163589	-0.0125463	-0.017776	-0.0152696	-0.0139725	-0.0227659	-0.00927774	-0.0149885	-0.0172035	-0.0296926	-0.0164512	-0.0149917	-0.0102288	-0.023866	-0.0614344		S	-0.0184943	-0.00781863	-0.0144349
G	0.00478898	-0.0120142	-0.0105389	-0.0103027	-0.0178784	-0.00997736	-0.0161562	-0.00754063	-0.0113042	-0.0116401	-0.00596308	-0.0101134	-0.0125619	-0.014773	-0.0130672	-0.0104907	-0.0081484	-0.008863	-0.00443063	-0.00822608	-0.0864098		G	0.00152642	-0.0105187	-0.0154849	-0.0126758	-0.0149572	-0.00885174	-0.00475877	-0.00963819	-0.0132637	-0.0122925	-0.00955878	-0.0228927	-0.0133186	-0.0130228	-0.0137508	-0.0179512	-0.0112868	-0.010607	-0.0169181	-0.0113172	-0.0484148		G	-0.00180352	-0.013827	-0.01382
P	-0.0129482	-0.0152665	-0.0108845	-0.0120192	-0.0221814	-0.0111708	-0.00761587	-0.0100764	-0.0171541	-0.0163385	-0.0159417	-0.0375802	-0.0153387	-0.0129972	-0.0172114	-0.0180693	-0.0135892	-0.016335	-0.018502	-0.0250278	-0.102745		P	-0.0146313	-0.0203587	-0.0154702	-0.0162574	-0.0281487	-0.0169981	-0.00866562	-0.0188595	-0.0211084	-0.0217996	-0.0168139	-0.0239369	-0.0179923	-0.0262034	-0.0209862	-0.021007	-0.0144968	-0.0195561	-0.0140598	-0.02729	-0.0871373		P	-0.0212748	-0.0110906	-0.0213584
Q	0.00936765	0.00645066	-0.0139196	-0.0103994	-0.0157057	-0.00853477	-0.00580847	-0.00901985	-0.00462569	-0.0050283	-0.0105445	-0.00759081	-0.0106032	0.0126445	-0.00298589	-0.00946113	0.00542278	-0.00015651	-0.0133717	-0.0157429	-0.0667179		Q	0.00524358	-0.0177373	-0.0214207	-0.0179527	-0.0183558	-0.0103615	-0.0247143	-0.00687039	-0.0152638	-0.0169534	-0.0112623	-0.0138118	-0.01823	-0.00720735	-0.0164734	-0.0125684	-0.0117479	-0.0102227	-0.012445	-0.017922	-0.0833832		Q	-0.0155598	-0.0149963	-0.012486
N	0.0109776	-0.0113791	-0.0213563	-0.00140939	-0.0179597	0.00249464	-0.00717336	-0.00705564	-0.0153553	-0.0137647	-0.0118928	-0.00895739	-0.00662104	-0.00696817	-0.0146507	-0.00446091	-0.00385151	-0.017041	-0.0173185	-0.0212113	-0.0726525		N	-0.0084686	-0.0135246	-0.0129398	-0.012837	-0.0162672	-0.0130288	-0.0223495	-0.0119148	-0.0130445	-0.0133573	-0.0101762	-0.0181645	-0.0185349	-0.0132473	-0.00705595	-0.0158461	-0.00260231	-0.0150191	-0.0241406	-0.00500568	-0.0854768		N	-0.0247395	-0.00382168	-0.0143124
H	0.0037411	-0.018778	-0.0125662	-0.0153747	-0.0141783	-0.000347274	-0.0263277	-0.00635093	-0.00928212	-0.0128637	-0.0130872	-0.0126412	-0.00651595	-0.00704141	-0.00512614	-0.0050768	-0.000760202	-0.0130273	0.00134583	-0.0113434	-0.0465885		H	-0.00181687	-0.00907605	-0.0159653	-0.000391484	-0.012149	-0.0142529	0.00055243	-0.00658191	-0.0165015	-0.0173578	-0.0112201	-0.0206518	-0.0144583	-0.00540487	-0.0183021	-0.0168055	-0.0115066	-0.0106226	7.29668e-05	-0.0219781	-0.0668169		H	-0.0206887	-0.0308719	-0.0134067
C	-0.0100362	0.00904859	-0.0068745	-0.00663247	-0.0143117	-0.00494093	0.00718711	-0.00764024	-0.0171798	-0.0158538	-0.00458802	-0.0156391	-0.0106459	-0.0138788	-0.00895299	-0.00381298	-0.00475659	-0.0126483	0.0219872	-0.0072296	-0.0477384		C	-0.00541661	-0.0095841	-0.00965238	-0.0102478	-0.0195829	-0.00720484	-0.0124552	-0.00841877	-0.0102972	-0.0195112	-0.0183017	-0.0215819	-0.00652447	-0.0165582	-0.0149811	-0.00447252	-0.0259043	-0.0155092	-0.0187144	-0.0128751	-0.0457934		C	-0.0205092	-0.0214756	-0.0102296
K	0.0145871	0.0165516	0.00346109	0.00321418	-0.0102215	-0.0125746	-0.00365496	-0.00240599	0.0101261	-0.00747175	-0.0147492	-0.0178948	-0.00867136	-0.00439765	-0.0115526	-0.0212459	-0.0107852	-0.00926463	-0.00524985	-0.00559541	-0.107913		K	0.00220831	-0.0292476	-0.0171748	-0.00202727	-0.0148599	-0.0101096	-0.0147302	-0.00689136	-0.00775339	-0.00933237	-0.0130397	-0.0173291	-0.0138182	-0.00477978	-0.0166854	-0.0176171	-0.0117306	-0.0159227	-0.0220578	-0.0185917	-0.0818789		K	-0.0142101	-0.0178765	-0.0226932
R	0.00266782	-0.00329096	-0.00695022	-0.00844787	-0.0155731	-0.0105061	-0.00965687	-0.00536412	-0.00800074	-0.00938631	-0.00634798	-0.0107967	-0.00640846	-0.0134345	-0.0124389	-0.0106158	-0.0086464	-0.00557573	-0.00837709	-0.0110456	-0.0727595		R	0.00366205	-0.0132557	-0.018063	-0.0087803	-0.01838	-0.0119019	-0.00925116	-0.0111686	-0.0119341	-0.0104415	-0.00967781	-0.0149571	-0.0158098	-0.0140738	-0.018481	-0.0183873	-0.00782636	-0.0141188	-0.0038079	-0.0130413	-0.043938		R	-0.0079403	-0.0156018	-0.0210315
E	0.019276	-0.0132275	-0.026032	-0.0206207	-0.0138863	-0.0217488	-0.0131761	-0.0103095	-0.00881251	-0.0210771	-0.00965876	-0.0124702	-0.0269579	-0.0138267	-0.00763818	-0.00563822	-0.00206243	-0.0172061	-0.0273286	-0.0305073	-0.0784322		E	-0.0170489	-0.0305714	-0.00620106	-0.0150752	-0.0255113	-0.0114684	-0.00126118	-0.0124545	-0.0146641	-0.0194204	-0.00434501	-0.0251643	-0.0418561	-0.00355121	-0.0186799	-0.00956361	-0.0111669	-0.0174586	-0.0252602	-0.0204886	-0.0719973		E	-0.00294563	-0.0310005	-0.0207834
D	-0.000537864	-0.00649032	-0.00699922	-0.0146785	-0.0248575	-0.0101763	-0.00650906	-0.0100653	-0.0134093	-0.022434	-0.0131951	-0.0133066	-0.00782336	-0.0218737	-0.0134159	-0.0155127	-0.0371014	-0.0134151	-0.0177248	-0.0227502	-0.0773872		D	-0.0092019	-0.0210973	-0.0138172	-0.0235578	-0.0240982	-0.0217014	-0.00862757	-0.0185623	-0.0244863	-0.0228272	-0.0213708	-0.0328605	-0.0162109	-0.0230153	-0.0255194	-0.0150192	-0.0378219	-0.0156086	-0.0328235	-0.0422264	-0.101651		D	-0.0256501	-0.039001	-0.0199975
*	N/A	N/A	N/A	N/A	N/A	N/A	N/A	N/A	N/A	N/A	N/A	N/A	N/A	N/A	N/A	N/A	N/A	N/A	N/A	N/A	N/A		*	N/A	N/A	N/A	N/A	N/A	N/A	N/A	N/A	N/A	N/A	N/A	N/A	N/A	N/A	N/A	N/A	N/A	N/A	N/A	N/A	N/A		*	N/A	N/A	N/A
[truncated: 40 more columns]

[truncated: 1 more sheets: P-value 2D aminoacid heatmap]
