# Supplementary material for: Context specificity of translation inhibitors revealed by toe-seq
Source: Research Square preprint supplement (doi:10.21203/rs.3.rs-3832009/v1), 2024-04-03
Supplement: Supplementary file 2 [file 0b053df1435999b9c1b78ba8.xlsx]

## Sheet: Title
Supplementary table 4
Ribosome stalling sites, positional, amino acid and codon preferences of ribosome stalling sites, preferences of stalling at combinations of codons and corresponding amino acids in different sites and its significance for translation inhibition by Cm.

## Sheet: Codon heatmap
Stop efficiency at the corresponging triplet in the -2nd position while mRNA codon with specified index number is located in the P-site													Stop efficiency at the corresponging triplet in the E-site while mRNA codon with specified index number is located in the P-site													Stop efficiency at the corresponging triplet in the P-site while mRNA codon with specified index number is located in the P-site													Stop efficiency at the corresponging triplet in the A-site while mRNA codon with specified index number is located in the P-site
-2		Index number of mRNA codon located in the P-site											E		Index number of mRNA codon located in the P-site											P		Index number of mRNA codon located in the P-site											A		Index number of mRNA codon located in the P-site
		4	5	6	7	8	9	10	11	12	13				3	4	5	6	7	8	9	10	11	12				2	3	4	5	6	7	8	9	10	11				1	2	3	4	5	6	7	8	9
P	CCC	-0.0177397	-0.000409032	-0.00227995	0.0269265	0.000479401	-0.0059825	-0.00831003	0.00189627	-0.00605204	-0.00952028		P	CCC	-0.0184818	-0.00709263	-0.00889094	-0.0039075	0.0236982	-0.000682742	-0.0095334	-0.0104774	-0.00396581	-0.0016547		P	CCC	-0.0247513	-0.0132691	-0.0152506	0.0113426	0.0147437	0.0338458	0.00526453	0.00107711	0.00444007	0.0340555		P	CCC	-0.0110315	-0.0194227	-0.00808368	-0.00333062	0.0272729	0.0237731	0.0364676	0.0127833	0.0091079
P	CCT	-0.0112694	-0.005035	0.00269045	0.0230781	0.0029731	-0.00284392	-0.00504339	0.00669521	-0.00251282	-0.00929354		P	CCT	-0.0235233	-0.0201466	-0.00818123	-0.00216512	0.0122375	-0.00452094	-0.0150117	-0.00821185	-0.00759827	-0.00276767		P	CCT	-0.0298741	-0.00821682	-0.0125472	0.0147858	0.0157413	0.0309071	0.00507074	-0.00233194	0.0120652	0.0561936		P	CCT	-0.0207582	-0.0257156	-0.00416363	-0.0067607	0.0330287	0.0219236	0.0453665	0.0192845	0.00568953
P	CCA	-0.0165301	-0.00264784	0.00124165	0.0166798	0.00560837	-0.00251259	-0.00527911	0.00836662	-0.00249688	-0.00569969		P	CCA	-0.0198161	-0.0219622	-0.0183729	-0.00675821	0.0205299	0.001626	-0.0115628	-0.014979	-0.0032486	0.0057073		P	CCA	-0.0361938	-0.021906	-0.0203367	0.00661822	0.0187221	0.0343999	0.00123607	-0.00827903	0.00963743	0.0471845		P	CCA	-0.0236212	-0.0301446	-0.00435712	0.00126774	0.0402583	0.0266784	0.0535864	0.0206249	0.00605915
P	CCG	-0.0118064	-0.000116935	-0.0070611	0.024927	0.00718798	-0.00136058	-0.00432171	0.00712619	-0.00258467	-0.0110086		P	CCG	-0.0207292	-0.0167235	-0.00890891	-0.00642019	0.0213353	-0.00079127	-0.0102128	-0.00487873	-0.00285407	-0.00196977		P	CCG	-0.0292988	-0.0156708	-0.00846988	0.0249852	0.00894277	0.0314704	0.00953649	0.000739483	-0.00126125	0.0433687		P	CCG	-0.0159308	-0.0226374	-0.0136859	-0.00417338	0.0157795	0.00369882	0.0415944	0.0109132	0.00404402
L	CTC	0.00351288	0.0179462	0.021417	0.0368889	0.0146791	0.0118055	0.0108005	0.0442087	0.000205891	-0.0085954		L	CTC	-0.011356	-0.0186198	-0.00158362	0.00117363	0.0248361	0.000448904	-0.00510709	-0.010735	-0.00993769	-0.00095942		L	CTC	-0.0239619	-0.000886254	0.00354019	0.0341039	0.0171095	0.0365249	0.0134318	0.00660396	0.00638825	0.0200715		L	CTC	-0.0170185	-0.025387	-0.0127639	-0.000951411	0.0226678	0.0140747	0.0596375	0.011352	0.00609
L	CTT	0.0137698	0.0272544	0.0146195	0.0339434	0.00639097	0.0106316	0.0121104	0.0362056	-0.00360077	-0.00992661		L	CTT	-0.0136209	-0.0137055	0.000531145	0.00609741	0.0181821	-0.00719058	-0.00982711	-0.00635295	-0.0127789	-0.00520043		L	CTT	-0.0319984	-0.00844498	0.00578726	0.0218889	0.035	0.0475033	0.0172711	0.00878228	0.00610742	0.0430802		L	CTT	-0.0373305	-0.0346681	-0.0240879	-0.012269	0.0321806	0.00720725	0.0452191	0.0212618	0.0186701
L	CTA	-0.00422734	0.0142701	0.0196887	0.0466748	0.00773619	0.00567147	0.00538345	0.0306785	0.00213701	-0.00863149		L	CTA	-0.0135481	-0.0112512	-0.00202209	0.00436118	0.0322627	0.00509198	0.000164239	-0.00082294	-0.0101844	-0.00509619		L	CTA	-0.0430525	-0.00898418	-0.0114031	0.0335939	0.0155046	0.044744	0.0125049	0.0111763	0.015352	0.0319271		L	CTA	-0.0684388	-0.0660569	-0.0167468	0.00290298	0.0256405	0.0385628	0.0621613	0.0238191	0.0492001
L	CTG	0.00301346	0.0419332	0.0198076	0.0354797	0.0219807	0.00821584	0.0124303	0.0411872	0.00821686	-0.0123409		L	CTG	-0.0246945	-0.0149778	-0.0160061	0.00427227	0.0237883	-0.00582152	-0.0112255	-0.0082433	-0.00389444	0.000644767		L	CTG	-0.027789	-0.00780051	0.0176777	0.0340705	0.0205352	0.041687	0.0136482	0.0120788	0.00520562	0.0366846		L	CTG	-0.0276909	-0.027665	-0.0098813	-9.73369e-05	0.00734628	0.0266564	0.0368371	0.0176259	0.0132559
H	CAC	-0.00229173	0.0225143	0.0210813	0.0361449	0.00963402	0.00726183	0.0124521	0.0371462	0.00332326	-0.00893633		H	CAC	-0.0123292	-0.0169743	-0.00844673	-0.00219805	0.0289788	0.00203116	-0.00506978	-0.00502657	-0.00858258	0.00104351		H	CAC	-0.0174921	-0.0103885	-0.000375069	0.0236707	0.0314772	0.0516277	0.020457	0.02095	0.0184306	0.0349531		H	CAC	-0.0211016	-0.0334736	-0.0100323	-0.00312677	0.0385855	0.0282189	0.0496142	0.0246757	0.0132787
H	CAT	-0.0116959	0.0249289	-0.00436459	0.0371606	0.00360936	0.00404773	0.00406793	0.03238	-0.00730153	-0.0117266		H	CAT	-0.0140244	-0.0135485	-0.00993261	0.0036954	0.0173756	0.00194678	-0.00416208	0.00077029	-0.00946518	-0.00688913		H	CAT	-0.0385766	-0.0167868	-0.00561182	0.0400218	0.0216694	0.06712	0.0177674	0.0156768	0.01967	0.0504453		H	CAT	-0.0342139	-0.039687	-0.0127	0.00715031	0.0517934	0.0287212	0.0563813	0.0209944	0.00879509
Q	CAA	-0.0153793	0.0234125	0.0330933	0.0310749	0.0188835	0.0290927	0.00309496	0.0621889	0.000130082	-0.0230075		Q	CAA	-0.0246081	-0.0279356	-0.00761702	-0.00444067	0.0196542	-0.00336611	-0.00344331	-0.00190038	0.000894908	-0.00650048		Q	CAA	-0.0360043	-0.0131377	0.00814024	0.0310186	0.0221947	0.0529555	0.0196748	0.00969772	0.00488406	0.0498509		Q	CAA	-0.0350896	-0.0338048	-0.0108375	-0.00393827	0.0229849	0.0374625	0.0619842	0.029828	0.0158447
Q	CAG	-0.0157064	0.0418506	0.0333006	0.0546105	0.0223537	0.0178241	0.00696212	0.0482769	0.0118133	-0.0132708		Q	CAG	-0.0165308	-0.0228503	-0.0138906	-0.00377866	0.0187201	0.00116509	-0.00101057	-0.000629438	-0.00384609	-0.00653112		Q	CAG	-0.0416983	-0.0149996	-0.000249729	0.0388948	0.0170958	0.0485379	0.027719	0.010306	0.0124184	0.0177387		Q	CAG	-0.0347039	-0.0354162	-0.0152076	-0.00727509	0.0499615	0.0353364	0.0642151	0.0213889	0.0222326
R	CGC	0.0106039	0.0385125	0.023058	0.0430015	0.0132796	0.0128918	0.0154549	0.0668185	0.00708302	-0.00779291		R	CGC	-0.0254682	-0.0130273	-0.000891456	-0.0120953	0.0261391	0.00334526	-0.00543494	-0.00757411	-0.0118142	-0.00719387		R	CGC	-0.0272305	-0.0110852	6.65074e-05	0.0313261	0.030285	0.0500904	0.0166659	0.00412207	0.00486776	0.0334791		R	CGC	-0.0100458	-0.0223718	-0.00712298	-0.00592837	0.0260976	0.0140208	0.0388296	0.013795	0.0108136
R	CGT	-0.00446776	0.0306977	0.0127007	0.0491857	0.0129914	0.0189084	0.0174575	0.0614838	-0.00116576	-0.00872246		R	CGT	-0.019735	-0.0189344	-0.0107288	-0.0153878	0.0122289	-0.00519255	-0.00712037	-0.0126386	-0.0190992	-0.0114388		R	CGT	-0.0259302	-0.0134953	0.00354916	0.0162802	0.0205673	0.0563811	0.0168751	0.00674399	0.0103513	0.0357999		R	CGT	-0.0121099	-0.0314841	-0.0143247	-0.00747528	0.0307613	0.0187663	0.0488452	0.0169843	0.0114573
R	CGA	-0.00210825	0.0375511	0.0127471	0.0494661	0.0211779	0.0137783	0.0151933	0.052465	0.00166149	-0.00712989		R	CGA	-0.0270844	-0.0254696	-0.0111972	-0.0042048	0.009573	0.000683556	-0.00356336	-0.00492856	-0.00514128	-0.00602247		R	CGA	-0.0576322	-0.0104087	0.0198026	0.0329904	0.0203035	0.0411454	0.0270877	0.030599	0.0161965	0.0527964		R	CGA	-0.0359013	-0.0377985	-0.0111288	-0.00906789	0.0537587	0.0410654	0.043265	0.034193	0.0129721
R	CGG	0.012546	0.0365513	0.0240035	0.0408542	0.0278115	0.0168348	0.0185461	0.0578137	0.0076293	-0.0103347		R	CGG	-0.0177327	-0.0113167	-0.00695813	-0.000526648	0.0280764	0.00895453	-0.00333627	0.00336007	-0.00979658	0.000409068		R	CGG	-0.0185647	-0.014625	-0.00159184	0.0259668	0.0203153	0.0454466	0.0147611	0.0124706	0.00803529	0.0395593		R	CGG	-0.0110325	-0.0218902	-0.00497099	0.00572036	0.0376176	0.0223356	0.0441273	0.0228575	0.0196461
S	TCC	-0.00736886	0.0287277	0.0254434	0.0566931	0.0217394	0.0153191	0.00674001	0.0337088	0.00539309	-0.00900282		S	TCC	-0.00258832	0.0311571	0.0973176	0.055305	0.0882167	0.0503384	0.0438061	0.0348375	0.117037	0.0171182		S	TCC	-0.0241007	-0.0124025	0.00790494	0.0276325	0.0273472	0.0557022	0.0186957	0.013276	0.013379	0.0526127		S	TCC	-0.0242903	-0.0230471	-0.0136002	-0.00736723	0.00746711	0.00862119	0.0426872	0.00931455	0.00689004
S	TCT	-0.00328115	0.0323723	0.0194162	0.0609878	0.0181051	0.0117254	0.0203247	0.041954	-0.000183123	-0.000386862		S	TCT	-0.000144516	0.0383583	0.117526	0.0852447	0.100311	0.0636586	0.0498165	0.0464302	0.126874	0.0160485		S	TCT	-0.0264881	-0.0162947	0.0167308	0.0371182	0.0292472	0.0436473	0.0204649	0.025787	0.0141174	0.0476444		S	TCT	-0.0293961	-0.0313208	-0.0203122	-0.00510557	0.0126296	0.0180454	0.0420827	0.00982004	0.00152089
S	TCA	-0.010362	0.0247521	0.0317286	0.0572622	0.0269481	0.0105051	0.00592031	0.0599928	0.00690649	-0.00533319		S	TCA	0.00302047	0.0726905	0.135031	0.108787	0.121601	0.0730984	0.048352	0.0643167	0.121035	0.0109916		S	TCA	-0.0456447	-0.0137095	-0.00130901	0.0284079	0.0232316	0.0590429	0.0281641	0.0100129	0.00919039	0.0450604		S	TCA	-0.028215	-0.0507405	-0.0242719	-0.00582392	0.00692919	0.0180444	0.0484327	0.0128765	0.00113772
S	TCG	0.00424637	0.0395485	0.0380597	0.0543524	0.0165268	0.0185874	0.0168648	0.0501248	0.00855934	-0.00584815		S	TCG	0.0038335	0.0366451	0.121376	0.0755873	0.105932	0.0610836	0.0454627	0.0509479	0.114358	0.00598894		S	TCG	-0.0388648	-0.00977375	-0.00558515	0.0232062	0.0220549	0.0443547	0.0250028	0.0199284	0.0181802	0.0710072		S	TCG	-0.0211947	-0.0316089	-0.021936	-0.00734632	0.0174531	0.0244745	0.0430326	0.0107568	0.00644058
F	TTC	-0.00955555	0.0118012	0.0259819	0.023569	0.0170027	0.00483625	0.00586241	0.041443	0.00195843	-0.00733466		F	TTC	-0.0128379	-0.0171274	-0.00688361	-0.00029001	0.0145139	0.00406227	-0.00551859	-0.010258	-0.0153439	-0.00327446		F	TTC	-0.0210009	-0.0044683	0.0119624	0.0220806	0.0223158	0.0566386	0.0279415	0.0146706	0.0107982	0.0540718		F	TTC	-0.0135138	-0.0206683	-0.0130241	-0.003654	0.0311113	0.0114965	0.0422091	0.0196221	0.0123697
F	TTT	-0.00567937	0.00970005	0.0194578	0.0437439	0.00672364	-0.00339574	0.0170201	0.0410118	0.0102086	-0.00332273		F	TTT	-0.014509	-0.0197613	-0.00452199	0.000924219	0.027129	0.00825447	-0.00276636	-0.00364816	-0.00628936	-0.000706872		F	TTT	-0.0267487	-0.00600121	0.00647648	0.0428365	0.0321111	0.0635711	0.0167434	0.0241841	0.0115697	0.0281789		F	TTT	-0.0146497	-0.0224536	-0.0204277	0.00278054	0.0397195	0.0251659	0.0353826	0.0151158	-0.00171096
L	TTA	-0.0135944	0.0322917	0.016615	0.0409034	0.00421587	0.0184028	0.0113785	0.0430715	7.01338e-05	-0.0222536		L	TTA	-0.0183834	-0.0136485	-0.0231966	-0.00337947	0.0181117	-0.000264459	-0.0140504	-0.0074075	0.0034962	-0.00580305		L	TTA	-0.0452662	-0.00760054	-0.0104367	0.0184039	0.0351643	0.0295296	0.0232628	0.0187542	0.0163362	0.00248953		L	TTA	-0.0335052	-0.0372435	-0.0320846	-0.00676296	0.0147939	0.03134	0.0426283	0.0315584	0.0307238
L	TTG	0.00864393	0.0282657	0.0282886	0.0462829	0.0208419	0.00749377	0.0124825	0.0531042	0.0038367	-0.012843		L	TTG	-0.00989487	-0.00773572	-0.0140187	-0.0151462	0.0202075	-0.00145967	-0.00840989	-0.00781553	-0.0055709	-0.00147623		L	TTG	-0.0402981	-0.00182844	0.000476617	0.0247871	0.0331443	0.0411293	0.0143181	-4.9664e-05	0.00898216	0.0321925		L	TTG	-0.0148511	-0.0264867	-0.012073	-0.0105646	0.0445635	0.0390479	0.0677651	0.0183003	0.0231493
Y	TAC	-0.00244117	0.0341686	0.0195018	0.0333857	0.010134	0.0104036	0.00730946	0.0415053	0.00420121	-0.0106867		Y	TAC	-0.0157761	-0.019037	-0.00542369	-0.00161683	0.0319317	-0.00348907	0.000244859	-0.0104593	0.00105269	-0.0150097		Y	TAC	-0.0285829	-0.00583074	-0.00447268	0.0307094	0.0464547	0.0412799	0.0166473	0.00935658	0.0309334	0.0374751		Y	TAC	-0.00719909	-0.0255387	-0.00648736	0.00189964	0.0450302	0.0324739	0.0429831	0.00854743	0.0185474
Y	TAT	-0.0127103	0.0146732	0.0291481	0.0253623	0.00593875	0.0120394	0.00946759	0.030778	0.00657191	-0.00219052		Y	TAT	-0.0201936	-0.0181302	-0.00714314	-0.00446757	0.0109743	0.000375464	-0.00516907	-0.00592535	-0.0043677	0.00306243		Y	TAT	-0.0354364	-0.0131169	0.00599066	0.0541854	0.0441535	0.0359546	0.00823344	0.0163134	0.0151822	0.0253999		Y	TAT	-0.0351107	-0.0398867	-0.0108689	0.00676131	0.0352278	0.0555196	0.0580104	0.0330427	0.0254158
*	TAA	0	0	0	0	0	0	0	0	0	0		*	TAA	0	0	0	0	0	0	0	0	0	0		*	TAA	0	0	0	0	0	0	0	0	0	0		*	TAA	-0.0637055	-0.0759099	-0.0129723	0.0214098	-0.0159478	0.0261663	0.0736504	0.0235825	0.0293107
*	TAG	0	0	0	0	0	0	0	0	0	0		*	TAG	0	0	0	0	0	0	0	0	0	0		*	TAG	0	0	0	0	0	0	0	0	0	0		*	TAG	-0.0801278	-0.0523941	-0.0180945	-0.00193202	0.0411506	0.0292325	0.0527771	0.0308192	0.00366547
C	TGC	-0.00398358	0.0249656	0.0267742	0.0422763	0.0151717	0.00884605	0.0119068	0.0377979	-0.000156868	-0.0053617		C	TGC	-0.0181878	-0.00258302	0.0178917	0.0268934	0.04626	0.0126345	0.00866914	0.00656573	0.0401367	-0.00107725		C	TGC	-0.0369078	-0.0166897	0.00486571	0.0159874	0.0187692	0.0413336	0.0154716	0.0176172	0.00844597	0.0321616		C	TGC	-0.0161734	-0.030812	-0.0130748	-0.0108712	0.00499045	0.00122674	0.0317732	0.00540004	-0.00847448
C	TGT	0.00412468	0.0304294	0.0316475	0.0555218	0.00987988	0.00951814	0.000767589	0.0288335	0.00590027	-0.0134119		C	TGT	-0.0161683	-0.00176649	0.0246272	0.0196616	0.0518195	0.0183868	0.00981403	0.00253111	0.0397589	0.00532867		C	TGT	-0.0310977	-0.0111154	-0.00342489	0.012108	0.0154013	0.0348584	0.0072896	0.0130479	0.00652472	0.0338769		C	TGT	-0.0265056	-0.0377111	-0.00957908	-0.00732064	0.0358884	0.0360603	0.0434072	0.0220812	0.00960499
*	TGA	0	0	0	0	0	0	0	0	0	0		*	TGA	0	0	0	0	0	0	0	0	0	0		*	TGA	0	0	0	0	0	0	0	0	0	0		*	TGA	-0.0708324	-0.0882326	0.0202525	0.0265436	0.0491172	0.0356767	0.0836629	0.0359903	0.0278631
W	TGG	0.00220325	0.0293729	0.0170431	0.0369432	0.0193434	0.0130452	0.0142285	0.0507455	0.000309871	-0.0138451		W	TGG	-0.0122607	-0.0230201	-0.00403586	-0.00174264	0.0223721	0.00672796	-0.00414928	-0.00424001	-0.00793001	-0.0019917		W	TGG	-0.0358341	-0.0108934	0.00320115	0.0200032	0.0193003	0.0610224	0.0168533	0.0131667	0.0155572	0.02217		W	TGG	-0.0101275	-0.0252584	0.00776669	0.0175165	0.0316494	0.0440075	0.0679025	0.0419458	0.0351997
T	ACC	-0.00959946	0.0395769	0.0297294	0.0471047	0.0210486	0.0181816	0.0149789	0.0590962	0.00915001	-0.0119626		T	ACC	-0.0206425	-0.0182166	0.0279462	0.0183804	0.0363052	0.0178969	0.00514976	0.00101286	0.0265524	-0.00127487		T	ACC	-0.0358065	-0.00748005	-0.000471043	0.0299675	0.0233806	0.0544936	0.0205581	0.0207243	0.0143202	0.0436537		T	ACC	-0.00997257	-0.0188697	-0.0122985	-0.00302231	0.0259977	0.0160571	0.04149	0.00961042	0.00588236
T	ACT	-0.0194941	0.0169918	0.026042	0.0500997	0.0326077	0.0149093	0.0157326	0.0666319	0.00273642	-0.00999488		T	ACT	-0.0211622	-0.00886454	0.0328491	0.0250855	0.0354997	0.0131889	0.00314083	0.000490234	0.0207629	0.00529609		T	ACT	-0.0545344	-0.0093028	0.00734076	0.0368045	0.0204629	0.0517815	0.0202755	0.0152014	0.0194798	0.0460637		T	ACT	-0.015843	-0.0372291	-0.00612312	0.00800613	0.0325184	0.0142238	0.0449471	0.0108937	0.0191157
T	ACA	-0.00956148	0.020063	0.0369123	0.0490633	0.0325836	0.016506	0.0172265	0.049136	0.0188171	-0.00506692		T	ACA	-0.0150979	-0.0146238	0.0357019	0.0196266	0.0324007	0.017455	0.00327538	0.00905702	0.0366837	-0.00602662		T	ACA	-0.0557046	-0.0117852	-0.0123743	0.0223309	0.0181744	0.0407303	0.0178544	0.0142358	0.00829761	0.0310914		T	ACA	-0.0406955	-0.0446086	-0.0189516	-0.00588032	0.037268	0.0402035	0.0594975	0.041161	0.0189505
T	ACG	0.0029082	0.0359457	0.0345407	0.0552354	0.0191191	0.027285	0.0194419	0.0646444	0.00622021	-0.0100006		T	ACG	-0.0102112	0.00128366	0.0234159	0.0184237	0.0435499	0.0120221	0.00720303	0.00364999	0.0241681	-0.00525341		T	ACG	-0.0366546	-0.00888292	-0.00417045	0.0371271	0.0138129	0.0377412	0.0214956	0.00682227	0.00727573	0.0447968		T	ACG	-0.0267733	-0.0467094	-0.0148569	0.0111747	0.0487737	0.0358862	0.0625302	0.029996	0.0248711
I	ATC	-0.0131037	0.0294068	0.031953	0.0391733	0.0165478	0.00860982	0.0204578	0.0328705	-0.00430091	-0.0150313		I	ATC	-0.0202891	-0.0189408	-0.013792	0.000899823	0.0284567	-0.00164543	-0.000231451	-0.00619218	-0.00841744	-0.0063582		I	ATC	-0.038538	-0.00681808	0.00728464	0.0330723	0.0394988	0.0609597	0.0175534	0.00833072	0.018056	0.0439507		I	ATC	-0.0145686	-0.0261789	-0.0107248	-0.00975604	0.0304815	0.0225788	0.0421595	0.0246345	0.0236871
I	ATT	-0.0147992	0.0171356	0.0335268	0.0400272	0.0178589	0.0103351	0.014655	0.0468059	-0.0121457	-0.00621656		I	ATT	-0.0195988	-0.0265206	-0.0246612	0.00109346	0.0332952	0.00833391	-0.00954968	0.00441578	0.00730889	-0.00221371		I	ATT	-0.0443732	-0.0184927	0.00329746	0.0347113	0.0381812	0.0495723	0.018255	0.0353095	0.0110639	0.0361504		I	ATT	-0.0344757	-0.0349447	-0.0109955	0.00448245	0.0201346	0.0050101	0.0427955	0.00843755	0.0340654
I	ATA	-0.00792822	0.0294225	0.0149895	0.0348306	0.0169748	0.00656322	0.00711627	0.0345925	0.0197474	-0.0071384		I	ATA	-0.020107	-0.0110472	-0.0334773	-0.010656	0.0247014	-0.00215071	-0.00529972	-0.00754243	-0.000472034	-0.00514022		I	ATA	-0.0523908	-0.00724921	0.00197972	0.0243047	0.0421744	0.0563153	0.026198	0.0155648	0.0235831	0.043357		I	ATA	-0.0529592	-0.0602822	-0.0129925	0.0209879	0.0382638	0.036892	0.0657578	0.0220599	0.0210426
M	ATG	0.00265793	0.0426529	0.032657	0.0539896	0.0238408	0.0232496	0.00488635	0.0705117	0.00610442	-0.0166624		M	ATG	-0.020635	-0.0183245	-0.0201499	-0.00287206	0.000882336	0.0103755	-0.00676523	-0.00673895	-0.0104334	-0.00342877		M	ATG	-0.0316079	-0.0177784	0.000898593	0.0433949	0.0339524	0.033483	0.0249953	0.0104677	0.0166533	0.0162455		M	ATG	-0.02082	-0.0385505	-0.0149695	0.00742761	0.0348347	0.0336173	0.0416391	0.0217032	0.0197742
N	AAC	-0.0154747	0.0323258	0.0165176	0.0510145	0.00957808	0.011635	0.019652	0.0333301	-0.00391255	-0.00912722		N	AAC	-0.0140577	-0.0216155	-0.0169022	0.00162731	0.0235406	0.00239307	-0.00342118	-0.000436134	0.00327276	-0.00365101		N	AAC	-0.0413178	-0.0155868	-0.0130271	0.0208413	0.0135222	0.0516602	0.0199666	0.0175828	0.013137	0.0584764		N	AAC	-0.0307184	-0.0459632	-0.0121937	0.00671036	0.0391798	0.0276247	0.0650672	0.0360003	0.0391646
N	AAT	-0.00430611	0.0207857	0.0212811	0.0368185	0.0199589	0.00156866	0.00490872	0.0308415	-0.0041036	-0.0203293		N	AAT	-0.0176668	-0.0155222	-0.0134274	-0.00347696	0.0217134	0.000706114	-0.0027923	0.00355139	0.00858704	0.000780261		N	AAT	-0.0365217	-0.0275466	-0.0114384	0.0169358	0.0240599	0.0635772	0.019529	0.0287397	0.0174568	0.0285633		N	AAT	-0.0536029	-0.0660364	-0.0168333	0.0179447	0.040729	0.0779084	0.0760336	0.0350003	0.039745
K	AAA	0.00838246	0.0236114	0.0382588	0.0474815	0.0400497	0.024426	0.0292352	0.100574	0.0228932	-0.00819356		K	AAA	-0.0287185	-0.0264752	-0.0252476	-0.00121207	-0.00313845	-0.00490198	-0.000828106	-0.00516191	-0.00553784	-0.0141352		K	AAA	-0.0589381	-0.0187374	-0.030245	-0.00299622	0.0158403	0.0382969	0.0158977	0.0113601	0.0163468	0.0410132		K	AAA	-0.0435334	-0.0500281	-0.0193444	-0.0201447	0.0286955	0.0237676	0.0236606	0.0387207	0.0162664
K	AAG	0.00858841	0.0408725	0.0370015	0.0530405	0.0307852	0.0241878	0.03594	0.0563358	0.00466336	-0.0105915		K	AAG	-0.0303768	-0.0243647	-0.0191346	-0.00681897	0.0199758	0.00201074	-0.00466994	-0.0121899	0.00598629	0.00380311		K	AAG	-0.0568089	-0.0326958	-0.0172611	0.0127929	0.00307607	0.0456682	0.0175654	0.0122027	0.0202474	0.00818243		K	AAG	-0.058388	-0.0550897	-0.0211621	-0.021411	0.0320018	0.0239528	0.0440757	0.0531688	0.0300255
S	AGC	0.00364826	0.0366333	0.018983	0.0591992	0.0207864	0.00693558	0.00774282	0.0405536	0.000229061	-0.00687178		S	AGC	0.00748218	0.0467535	0.133418	0.10804	0.110922	0.0570325	0.0529711	0.0620052	0.127916	0.0211066		S	AGC	-0.0315317	-0.0213914	0.011937	0.0288745	0.024444	0.0389815	0.0307638	0.0189454	0.0101044	0.05159		S	AGC	-0.0365042	-0.0511766	-0.0130897	-0.0195867	0.0064524	0.00825018	0.0345293	0.0104937	0.00530425
S	AGT	-0.000268774	0.0407812	0.030546	0.064877	0.0278281	0.0184041	0.00207037	0.0464809	0.0161306	-0.00938281		S	AGT	0.000411104	0.0603416	0.119701	0.0799753	0.0955119	0.0596817	0.0321365	0.0466165	0.114405	0.0123581		S	AGT	-0.0317746	-0.0185625	-0.00269774	0.0156586	0.0254393	0.0328185	0.0256614	0.0196974	0.0194303	0.0660833		S	AGT	-0.0715458	-0.0846511	-0.0351646	0.015844	0.0260327	0.0347291	0.0491179	0.0099725	0.0189013
R	AGA	0.0044128	0.0495607	0.0286018	0.0500292	0.0378648	0.0243686	0.0155025	0.0496003	-0.00164936	-0.0107869		R	AGA	-0.0223817	-0.0190325	-0.0135129	-0.00841188	0.0134601	0.00282007	-0.00658513	-0.000385216	0.000136976	-0.0124703		R	AGA	-0.053113	-0.0200414	-0.0115742	0.0186424	0.0280612	0.0402982	0.0258015	0.00411541	0.0107251	0.0383231		R	AGA	-0.0636869	-0.0749823	-0.0292438	0.00666635	0.0365882	0.0521135	0.0726273	0.0306339	0.0483775
R	AGG	0.0210263	0.0436525	0.032749	0.0422341	0.0323643	0.0181526	0.0206393	0.0488073	0.0045464	-0.00673201		R	AGG	-0.020016	-0.0182619	-0.00893806	-0.00559908	0.0235809	-0.00429239	0.00064528	-0.000681393	-0.00249017	0.00239372		R	AGG	-0.0287288	-0.0161743	-0.00572718	0.0336618	0.00855604	0.0411966	0.0199168	0.00810629	0.0108461	0.034188		R	AGG	-0.0422354	-0.0418857	-0.0130605	0.00370519	0.0355818	0.0354396	0.061128	0.0355672	0.0321572
A	GCC	-0.00322208	0.0228359	0.0218707	0.0534525	0.0178685	0.00769103	0.00626662	0.0397329	0.0027131	-0.0100517		A	GCC	0.00526505	0.0466901	0.10544	0.0918953	0.112395	0.0653954	0.0598851	0.0520471	0.155597	0.0271939		A	GCC	-0.0223397	-0.0143097	-0.00611702	0.0132515	0.00788484	0.0432636	0.0178482	0.00625567	0.00608471	0.0387933		A	GCC	-0.021644	-0.0220926	-0.0208504	-0.0109779	0.0149556	0.0105344	0.0354765	0.0111795	0.00609871
A	GCT	-0.00366765	0.0381385	0.00876728	0.0617848	0.0173428	0.0123442	0.0137089	0.0287802	0.00554507	-0.00588627		A	GCT	0.0165545	0.0567432	0.130595	0.0853852	0.103887	0.0703422	0.0639856	0.0528415	0.1505	0.0216886		A	GCT	-0.0327404	-0.00976383	-0.00699358	0.0186272	0.0111853	0.0430921	0.0171723	0.0149738	0.00229949	0.03783		A	GCT	-0.011642	-0.0245515	-0.00784647	-0.0064001	0.0207951	0.014047	0.0321027	0.0121352	0.000401
A	GCA	-0.00654994	0.0471301	0.0209714	0.0616458	0.020973	0.0152004	0.0150851	0.0331197	0.00995095	-0.010884		A	GCA	0.0383487	0.0906866	0.166571	0.113277	0.136752	0.0998046	0.0834452	0.0741167	0.173637	0.0296097		A	GCA	-0.0412376	-0.0155843	-0.00903721	0.0172904	0.0193848	0.0372282	0.0138525	0.0103832	0.00541722	0.0406614		A	GCA	-0.0190142	-0.047689	-0.0169912	-0.000487039	0.012362	0.00660887	0.0385141	0.011511	0.00173366
A	GCG	0.00598354	0.0272221	0.0263289	0.0620034	0.0239118	0.0158392	0.0119613	0.0392137	0.00520917	-0.00394781		A	GCG	0.0215023	0.048542	0.12627	0.0813271	0.0999281	0.073727	0.060538	0.0680036	0.15901	0.0284727		A	GCG	-0.0305809	-0.0129009	-0.00809434	0.0203938	0.0142209	0.0406473	0.0170264	0.00838043	0.00379499	0.0443111		A	GCG	-0.0203024	-0.0250345	-0.0136821	-0.00377159	0.0188359	0.00444047	0.0354986	0.016242	0.0062982
V	GTC	-0.00654978	0.0304808	0.0180832	0.047288	0.0221031	0.00592973	0.00707406	0.039213	-0.00603956	-0.011026		V	GTC	-0.0200299	-0.00950285	0.00722992	0.00467259	0.0282246	0.0049227	-0.00205596	0.00102739	0.0067435	-4.48515e-05		V	GTC	-0.0285565	0.00113237	0.00777485	0.042075	0.0296156	0.0578136	0.0204816	0.0198815	0.0127072	0.0506686		V	GTC	-0.0165566	-0.0223646	-0.0118522	0.00248441	0.0206166	0.0174321	0.0396927	0.0177637	0.00706764
V	GTT	0.00103896	0.0199542	0.00331421	0.047058	0.0194454	0.00802373	0.0157105	0.0331639	-0.00222604	-0.00761533		V	GTT	-0.0142624	-0.0164447	0.0065589	0.00384232	0.0312108	-0.00225272	0.00336809	-0.00275625	-0.00272711	-0.0178272		V	GTT	-0.0317605	0.000143596	0.0198014	0.0461334	0.0247354	0.0635125	0.0165975	0.0227482	0.0172055	0.03866		V	GTT	-0.0165717	-0.0250849	-0.0103083	0.00440483	0.0239139	0.0106082	0.0324696	0.00866955	0.0116731
V	GTA	-0.00403045	0.00803283	0.0349719	0.0367097	0.0187722	0.00886694	0.0171052	0.0502952	-0.00303866	-0.00498156		V	GTA	-0.0191757	-0.0145507	-0.00193286	0.00763652	0.0300037	0.00911372	0.00331664	0.00107945	0.00902597	0.00552608		V	GTA	-0.0382362	-0.00604271	-0.00332293	0.0425598	0.032629	0.0670253	0.0238388	0.0235049	0.0213193	0.0371192		V	GTA	-0.0263064	-0.0204522	-0.0199174	-0.00705682	0.0150977	0.0147308	0.0344828	0.0182711	0.0042599
V	GTG	0.00115787	0.0210501	0.0303272	0.0454477	0.0141064	0.0122049	0.0113049	0.0471431	0.0032336	-0.0138322		V	GTG	-0.0137452	-0.00961242	0.00142756	0.0094595	0.0226442	0.00110281	0.00363395	0.00405201	0.00865926	-0.00872973		V	GTG	-0.0405819	0.00196952	0.0234878	0.0416876	0.0411214	0.0509297	0.0358351	0.0190617	0.0108128	0.0496934		V	GTG	-0.0304272	-0.0235343	-0.00985094	-0.00365116	0.0210568	0.0261057	0.0512151	0.0146692	0.00876702
D	GAC	-0.00695595	0.0106558	0.0151863	0.0188978	0.00670707	-0.00260475	0.00103231	0.0332063	0.00144884	-0.00582474		D	GAC	-0.0261785	-0.0180273	-0.0158028	0.000153935	0.0177934	0.00706937	-0.00481402	-0.006198	0.000289026	-0.00123534		D	GAC	-0.0291866	-0.0179488	-0.00677466	0.0349777	0.0370631	0.0619513	0.0316996	0.0119225	0.0208374	0.0513917		D	GAC	-0.031858	-0.0448711	-0.00950693	0.0123063	0.0431516	0.0248956	0.0568149	0.0318514	0.014763
D	GAT	-0.0137979	0.00566764	0.00996858	0.0228207	0.0143817	2.01712e-05	0.0017329	0.0273382	0.00946857	-0.00891852		D	GAT	-0.0187694	-0.012676	-0.0145106	-0.00772753	0.020694	0.00286543	-0.0126662	0.00904015	0.0069972	-0.00754934		D	GAT	-0.0407465	-0.0124305	0.000838209	0.0455291	0.0247069	0.0567514	0.0173446	0.0338723	0.0178748	0.0562983		D	GAT	-0.0473798	-0.0526578	-0.0196768	0.0230562	0.043106	0.0413703	0.0631878	0.051528	0.0209911
E	GAA	-0.010803	0.0220248	0.0212541	0.030202	0.0253997	0.0103964	0.00648547	0.0318337	0.00946469	-0.0172378		E	GAA	-0.0205068	-0.0125545	-0.00886879	0.00185478	0.0147274	-0.00688746	-0.00807244	-0.00435667	-0.00690873	-0.00766327		E	GAA	-0.0681671	-0.0328008	-0.00981042	0.051363	0.0265757	0.0671456	0.0208914	0.0209114	0.00708356	0.0390358		E	GAA	-0.0452489	-0.0635097	-0.0101592	0.00972841	0.0471998	0.0484602	0.0749537	0.0217885	0.0395038
E	GAG	-0.00515367	0.012941	0.014955	0.0501159	0.0106605	0.00560557	0.0108277	0.0293516	0.0141651	-0.00838725		E	GAG	-0.0160365	-0.016517	-0.0124336	0.00196213	0.0255956	0.00142558	-0.00105079	-0.00761776	-0.0059552	0.000302042		E	GAG	-0.0412132	-0.0225363	0.00555234	0.0233276	0.0204231	0.0659798	0.0320592	0.0256512	0.0177909	0.0357873		E	GAG	-0.0526211	-0.0418357	-0.00695796	0.00458331	0.0493271	0.0668759	0.0682209	0.0366974	0.0238185
G	GGC	0.00975219	0.0215696	0.0185649	0.0515227	0.0152936	0.00807183	0.00939031	0.0548077	0.00538637	-0.00187986		G	GGC	-0.00947887	0.01433	0.041968	0.0345931	0.0594078	0.0232968	0.0191402	0.0216912	0.0841264	0.0129797		G	GGC	-0.0277327	-0.0135775	-0.00954877	0.00857537	0.00803625	0.0357891	0.00718724	0.00269044	0.0120846	0.036756		G	GGC	-0.0249397	-0.0227088	-0.009787	-0.00730413	-0.0062185	-0.0015285	0.0268122	0.000712093	-0.00118722
G	GGT	0.00179852	0.0279408	0.0115476	0.0449234	0.0217063	0.01612	0.0157413	0.0301452	0.011461	-0.00437255		G	GGT	-0.00742199	-0.00821372	0.0453718	0.0332561	0.0581002	0.0165523	0.0132349	0.0190034	0.0876434	0.00324481		G	GGT	-0.0289406	-0.0211428	-0.0116675	0.0173193	0.020373	0.0382741	0.0182435	0.00988101	0.0067284	0.039111		G	GGT	-0.0311275	-0.0294559	-0.0234691	-0.010439	-0.00550964	-0.00878201	0.0194957	0.00239223	-0.00841111
G	GGA	0.00459325	0.0274425	0.0209727	0.0501771	0.0127764	0.0121191	0.0163917	0.0388012	0.00170104	-0.00806596		G	GGA	-0.0128878	-0.00510324	0.0479879	0.0405883	0.0718562	0.0261905	0.0182562	0.0324753	0.0992926	0.0149605		G	GGA	-0.0404954	-0.0181638	-0.0193202	0.0107909	0.017848	0.0338841	0.0134662	0.00748806	0.00705733	0.0634954		G	GGA	-0.0341294	-0.0398921	-0.0258939	-0.0215543	0.00067475	-0.00567792	0.0287053	-0.00123302	-0.0118518
G	GGG	0.00894362	0.0218712	0.0178032	0.0481635	0.0221119	0.0149994	0.0111664	0.0501529	0.0129462	-0.00523515		G	GGG	-0.00458191	0.00234864	0.0460682	0.039424	0.0650052	0.0297394	0.024655	0.0154691	0.0786751	0.0199895		G	GGG	-0.0264813	-0.0134655	-0.00616174	0.0166335	0.00950579	0.041326	0.017774	0.00536888	0.0124274	0.0382887		G	GGG	-0.0206842	-0.0255053	-0.0166244	-0.0187296	-0.00836225	-0.00291238	0.0199076	0.0058529	-0.00325533
[truncated: 12 more columns]

## Sheet: P-value for codon heatmap
P-value for shuffled datasets exceeding experimental data of stop efficiency at the corresponging triplet in the -2nd position while mRNA codon with specified index number is located in the P-site													P-value for shuffled datasets exceeding experimental data of stop efficiency at the corresponging triplet in the E-site while mRNA codon with specified index number is located in the P-site													P-value for shuffled datasets exceeding experimental data of stop efficiency at the corresponging triplet in the P-site while mRNA codon with specified index number is located in the P-site													P-value for shuffled datasets exceeding experimental data of stop efficiency at the corresponging triplet in the A-site while mRNA codon with specified index number is located in the P-site
-2		Index number of mRNA codon located in the P-site											E		Index number of mRNA codon located in the P-site											P		Index number of mRNA codon located in the P-site											A		Index number of mRNA codon located in the P-site
		4	5	6	7	8	9	10	11	12	13				3	4	5	6	7	8	9	10	11	12				2	3	4	5	6	7	8	9	10	11				1	2	3	4	5	6	7	8	9
P	CCC	1	1	1	1	1	1	1	1	1	0.712862		P	CCC	0.988225	0.923007	1	1	1	1	1	1	1	0.980072		P	CCC	0	0.605072	1	0.999094	0.947464	0.999094	1	1	0.985507	0.927536		P	CCC	0	0	0.0226449	0.569746	0.261775	0.148551	0.988225	0.97192	0.743659
P	CCT	0.975543	1	1	0.999094	1	1	1	1	0.952899	0.645833		P	CCT	0.995471	0.999094	1	1	1	1	1	1	1	0.962862		P	CCT	0.221014	0.112319	0.984601	0.942029	0.794384	0.98913	0.996377	1	0.271739	0.00181159		P	CCT	0.0914855	0.0362319	0.0153986	0.779891	0.0697464	0.389493	0.470109	0.292572	0.923007
P	CCA	0.998188	1	1	1	0.999094	1	1	1	0.958333	0.188406		P	CCA	0.962862	1	1	1	1	1	1	1	1	0.307971		P	CCA	0.705616	0.997283	0.999094	0.998188	0.621377	0.960145	1	1	0.527174	0.130435		P	CCA	0.270833	0.22192	0.0253623	0.23279	0.000905797	0.105072	0.0824275	0.194746	0.88587
P	CCG	0.998188	1	1	1	1	1	1	1	0.98913	0.899457		P	CCG	0.998188	1	1	1	1	1	1	1	1	0.971014		P	CCG	0.0851449	0.869565	0.952899	0.419384	0.999094	0.998188	0.992754	1	1	0.182065		P	CCG	0	0	0.609601	0.662138	0.988225	1	0.778986	0.988225	0.995471
L	CTC	0.0969203	0.846014	0.338768	0.860507	0.709239	0.325181	0.376812	0.136775	0.803442	0.506341		L	CTC	0.326087	1	1	1	1	1	1	1	1	0.924819		L	CTC	0.0190217	0.00181159	0.104167	0.0244565	0.702899	0.923913	0.845109	0.869565	0.822464	0.999094		L	CTC	0.0108696	0.0335145	0.490036	0.361413	0.663949	0.898551	0.00452899	0.945652	0.893116
L	CTT	0.00634058	0.251812	0.73913	0.833333	0.957428	0.447464	0.350543	0.63587	0.916667	0.656703		L	CTT	0.564312	0.963768	0.997283	0.942935	0.997283	1	1	0.999094	1	0.970109		L	CTT	0.377717	0.216486	0.115036	0.597826	0.0271739	0.335145	0.5	0.657609	0.788043	0.332428		L	CTT	0.938406	0.570652	0.967391	0.928442	0.180254	0.958333	0.5	0.216486	0.0561594
L	CTA	0.582428	0.836957	0.483696	0.286232	0.931159	0.777174	0.763587	0.808877	0.557971	0.500906		L	CTA	0.554348	0.884058	0.993659	0.962862	0.878623	0.976449	0.958333	0.938406	1	0.947464		L	CTA	0.928442	0.269928	0.854167	0.141304	0.691123	0.475543	0.749094	0.478261	0.221014	0.806159		L	CTA	1	1	0.686594	0.230072	0.470109	0.0144928	0.0452899	0.162138	0
L	CTG	0.173007	0.000905797	0.473732	0.849638	0.125906	0.662138	0.287138	0.32971	0.0869565	0.914855		L	CTG	0.996377	0.996377	1	0.994565	1	1	1	1	1	0.771739		L	CTG	0.157609	0.120471	0	0.0634058	0.483696	0.673007	0.728261	0.32971	0.82971	0.69837		L	CTG	0.561594	0.125	0.240942	0.334239	0.998188	0.164855	0.854167	0.47192	0.283514
H	CAC	0.487319	0.57971	0.365942	0.894928	0.958333	0.792572	0.238225	0.586051	0.481884	0.553442		H	CAC	0.462862	0.999094	1	1	0.990036	1	1	1	1	0.737319		H	CAC	0	0.270833	0.307065	0.532609	0.0217391	0.0896739	0.201087	0.000905797	0.0226449	0.789855		H	CAC	0.134058	0.484601	0.216486	0.55163	0.00996377	0.0742754	0.192029	0.0280797	0.263587
H	CAT	0.895833	0.336957	0.999094	0.706522	0.990036	0.883152	0.825181	0.740036	0.977355	0.798913		H	CAT	0.565217	0.991848	1	0.981884	1	0.995471	0.999094	0.956522	1	0.979167		H	CAT	0.78442	0.883152	0.701993	0.0253623	0.435688	0.00181159	0.462862	0.136775	0.0597826	0.0942029		H	CAT	0.851449	0.886775	0.478261	0.0797101	0.000905797	0.129529	0.0978261	0.23279	0.611413
Q	CAA	0.977355	0.493659	0.0389493	0.924819	0.32971	0	0.882246	0.00362319	0.667572	1		Q	CAA	0.984601	1	0.999094	0.999094	0.998188	1	0.998188	0.976449	1	0.9375		Q	CAA	0.655797	0.525362	0.0751812	0.190217	0.404891	0.111413	0.333333	0.567029	0.754529	0.144022		Q	CAA	0.895833	0.519928	0.376812	0.576993	0.605072	0.00452899	0.0262681	0.0199275	0.225543
Q	CAG	0.981884	0.00181159	0.00271739	0.0307971	0.0914855	0.0262681	0.717391	0.0552536	0.0181159	0.933877		Q	CAG	0.749094	1	1	1	1	1	0.995471	0.995471	1	0.990036		Q	CAG	0.907609	0.735507	0.316123	0.0181159	0.690217	0.275362	0.00815217	0.509964	0.327899	0.999094		Q	CAG	0.891304	0.649457	0.692935	0.783514	0	0.00543478	0.00543478	0.183877	0.00543478
R	CGC	0	0	0.156703	0.442935	0.872283	0.182971	0.0271739	0	0.0797101	0.326993		R	CGC	1	0.998188	1	1	1	1	1	1	1	1		R	CGC	0.0253623	0.3125	0.211957	0.0425725	0.00996377	0.110507	0.526268	0.994565	0.952899	0.934783		R	CGC	0	0.000905797	0.0163043	0.833333	0.368659	0.96558	0.899457	0.877717	0.460145
R	CGT	0.641304	0.0923913	0.865036	0.131341	0.77808	0.0172101	0.0289855	0.000905797	0.865036	0.520833		R	CGT	0.962862	1	1	1	1	1	1	1	1	1		R	CGT	0.0507246	0.59058	0.131341	0.890399	0.467391	0.0307971	0.535326	0.84692	0.455616	0.766304		R	CGT	0	0.32337	0.633152	0.813406	0.184783	0.575181	0.286232	0.522645	0.42663
R	CGA	0.449275	0.0244565	0.841486	0.105072	0.154891	0.150362	0.112319	0.0208333	0.633152	0.285326		R	CGA	0.997283	1	1	1	1	1	1	1	1	0.981884		R	CGA	1	0.335145	0	0.076087	0.480072	0.685688	0.0126812	0	0.113225	0.0371377		R	CGA	0.943841	0.787138	0.355072	0.891304	0	0	0.595109	0.000905797	0.282609
R	CGG	0	0.00271739	0.126812	0.665761	0	0.0108696	0.00181159	0	0.0643116	0.802536		R	CGG	0.940217	0.992754	1	1	0.999094	0.992754	1	0.977355	1	0.822464		R	CGG	0	0.761775	0.39221	0.363225	0.48913	0.422101	0.745471	0.221014	0.714674	0.488225		R	CGG	0	0	0.00634058	0.00996377	0.00271739	0.339674	0.577899	0.0335145	0.00362319
S	TCC	0.826993	0.202899	0.0960145	0.00815217	0.0815217	0.0552536	0.783514	0.862319	0.231884	0.540761		S	TCC	0.00452899	0	0	0	0	0	0	0	0	0		S	TCC	0.0181159	0.486413	0.00996377	0.26721	0.0960145	0.0208333	0.341486	0.203804	0.183877	0.00724638		S	TCC	0.296196	0.0226449	0.605978	0.843297	1	0.978261	0.65308	0.98279	0.884964
S	TCT	0.543478	0.0960145	0.461051	0.00724638	0.348732	0.347826	0.0181159	0.30163	0.758152	0.00724638		S	TCT	0.00271739	0	0	0	0	0	0	0	0	0.00181159		S	TCT	0.0923913	0.818841	0.00181159	0.0597826	0.120471	0.546196	0.257246	0.00271739	0.223732	0.152174		S	TCT	0.70471	0.343297	0.918478	0.653986	0.941123	0.602355	0.662138	0.915761	0.960145
S	TCA	0.888587	0.40308	0.0561594	0.0307971	0.0144928	0.438406	0.726449	0.00452899	0.222826	0.23913		S	TCA	0.000905797	0	0	0	0	0	0	0	0	0.0942029		S	TCA	0.987319	0.615942	0.417572	0.292572	0.307065	0.0398551	0.0335145	0.547101	0.541667	0.240942		S	TCA	0.589674	0.997283	0.968297	0.699275	0.987319	0.624094	0.349638	0.772645	0.961957
S	TCG	0.0788043	0.000905797	0	0.0226449	0.476449	0.0144928	0.048913	0.0389493	0.0543478	0.146739		S	TCG	0	0	0	0	0	0	0	0	0	0.229167		S	TCG	0.861413	0.253623	0.76721	0.572464	0.337862	0.502717	0.0471014	0.00724638	0.0253623	0		S	TCG	0.137681	0.35779	0.994565	0.827899	0.904891	0.242754	0.625906	0.961957	0.868659
F	TTC	1	0.912138	0.0987319	0.990942	0.411232	0.844203	0.726449	0.40308	0.616848	0.344203		F	TTC	1	0.984601	1	0.998188	1	0.985507	0.997283	1	1	0.945652		F	TTC	0.0253623	0.0742754	0.00452899	0.599638	0.358696	0.0507246	0.0371377	0.221014	0.424819	0.0217391		F	TTC	0.0226449	0.0389493	0.51721	0.564312	0.199275	0.880435	0.620471	0.32971	0.356884
F	TTT	1	0.928442	0.493659	0.470109	0.908514	0.975543	0.164855	0.429348	0.148551	0.112319		F	TTT	1	1	0.997283	0.984601	0.925725	0.842391	0.956522	0.95471	1	0.745471		F	TTT	1	0.140399	0.144022	0.0163043	0.0896739	0.0398551	0.530797	0.0389493	0.455616	0.875906		F	TTT	0.0380435	0.0824275	0.854167	0.226449	0.0679348	0.360507	0.79529	0.575181	0.953804
L	TTA	1	0.0996377	0.574275	0.501812	0.924819	0.113225	0.429348	0.434783	0.673007	0.992754		L	TTA	1	0.939312	0.999094	0.988225	0.980978	0.983696	0.997283	0.952899	0.999094	0.861413		L	TTA	0.975543	0.243659	0.753623	0.720109	0.053442	0.85779	0.26721	0.171196	0.230072	1		L	TTA	0.859601	0.725543	0.976449	0.67663	0.817935	0.166667	0.565217	0.0806159	0.00724638
L	TTG	0	0.134058	0.0914855	0.330616	0.191123	0.650362	0.326087	0.0615942	0.443841	0.859601		L	TTG	1	0.807065	1	1	0.999094	0.998188	0.996377	0.998188	1	0.815217		L	TTG	1	0.0163043	0.298007	0.473732	0.048913	0.622283	0.660326	0.968297	0.557065	0.77808		L	TTG	0.0326087	0.140399	0.449275	0.881341	0.013587	0.0126812	0.0153986	0.418478	0.0172101
Y	TAC	0.491848	0.0471014	0.424819	0.868659	0.883152	0.44837	0.653986	0.368659	0.442029	0.733696		Y	TAC	0.629529	0.998188	1	0.998188	0.890399	0.999094	0.94837	0.998188	1	1		Y	TAC	0.261775	0.116848	0.598732	0.207428	0.000905797	0.586051	0.530797	0.604167	0.00181159	0.619565		Y	TAC	0.00996377	0.141304	0.11413	0.26087	0.0153986	0.0833333	0.593297	0.90942	0.0797101
Y	TAT	0.925725	0.810688	0.140399	0.936594	0.865036	0.34058	0.5	0.742754	0.313406	0.0996377		Y	TAT	0.898551	0.998188	1	0.985507	0.990942	0.960145	0.980072	0.964674	1	0.520833		Y	TAT	0.574275	0.67029	0.17029	0.00543478	0.0117754	0.700181	0.822464	0.19837	0.259964	0.880435		Y	TAT	0.879529	0.878623	0.381341	0.163043	0.206522	0.00452899	0.158514	0.0262681	0.0371377
*	TAA	0.367754	0.999094	0.941123	1	0.985507	0.88587	0.856884	0.994565	0.618659	0.100543		*	TAA	0.0108696	0.388587	0.974638	0.980978	1	0.977355	0.886775	0.819746	0.994565	0.655797		*	TAA	0	0.00634058	0.415761	0.992754	0.969203	0.998188	0.959239	0.853261	0.797101	0.994565		*	TAA	1	1	0.491848	0.00181159	1	0.333333	0.0280797	0.270833	0.0398551
*	TAG	0.36413	0.999094	0.993659	1	0.990942	0.939312	0.897645	1	0.699275	0.0108696		*	TAG	0.0353261	0.351449	0.999094	0.995471	1	0.991848	0.931159	0.908514	1	0.691123		*	TAG	0	0.00905797	0.365036	0.991848	0.984601	1	0.98913	0.932971	0.919384	1		*	TAG	1	0.999094	0.807971	0.457428	0.0625	0.192935	0.23913	0.0398551	0.863225
C	TGC	0.574275	0.398551	0.0643116	0.492754	0.582428	0.60779	0.356884	0.508152	0.821558	0.0987319		C	TGC	0.873188	0.48913	0.808877	0.111413	0.287138	0.808877	0.634058	0.741848	0.416667	0.868659		C	TGC	0.718297	0.782609	0.0643116	0.912138	0.567029	0.644928	0.631341	0.0407609	0.649457	0.89221		C	TGC	0.0380435	0.331522	0.51721	0.946558	0.996377	0.999094	0.960145	0.993659	1
C	TGT	0	0.111413	0.0561594	0.0561594	0.82971	0.51087	0.927536	0.883152	0.310688	0.907609		C	TGT	0.949275	0.456522	0.438406	0.476449	0.115036	0.40942	0.505435	0.872283	0.504529	0.341486		C	TGT	0.328804	0.441123	0.557065	0.942935	0.718297	0.794384	0.953804	0.314312	0.721014	0.746377		C	TGT	0.461051	0.798913	0.315217	0.759058	0.0969203	0.0543478	0.583333	0.194746	0.556159
*	TGA	0.335145	0.997283	0.961957	1	0.994565	0.955616	0.911232	1	0.683877	0.0516304		*	TGA	0.00815217	0.369565	0.992754	0.994565	1	0.993659	0.934783	0.888587	1	0.682971		*	TGA	0	0.0181159	0.415761	1	0.992754	1	0.995471	0.938406	0.88587	1		*	TGA	1	1	0	0	0.00362319	0.0407609	0	0.00905797	0.00905797
W	TGG	0.153986	0.122283	0.658514	0.755435	0.208333	0.253623	0.201993	0.0335145	0.740942	0.961051		W	TGG	0.413043	1	1	1	0.998188	0.98279	0.998188	0.998188	1	0.890399		W	TGG	0.665761	0.369565	0.147645	0.740036	0.492754	0.00543478	0.508152	0.265399	0.14221	0.996377		W	TGG	0	0.0461957	0	0	0.150362	0	0.00181159	0	0
T	ACC	0.895833	0.00996377	0.0362319	0.189312	0.115942	0.0144928	0.0416667	0	0.0253623	0.893116		T	ACC	0.955616	0.998188	0.240942	0.54529	0.92029	0.390399	0.947464	0.980978	0.990942	0.86413		T	ACC	0.662138	0.115942	0.346014	0.151268	0.256341	0.048913	0.129529	0.00362319	0.125906	0.263587		T	ACC	0.00181159	0.00452899	0.44837	0.541667	0.429348	0.797101	0.740942	0.95471	0.917572
T	ACT	0.993659	0.77808	0.184783	0.150362	0.00362319	0.19837	0.0769928	0.00271739	0.519022	0.639493		T	ACT	0.943841	0.8125	0.130435	0.188406	0.788949	0.752717	0.94837	0.923913	0.985507	0.354167		T	ACT	1	0.297101	0.076087	0.0615942	0.45471	0.205616	0.228261	0.19837	0.0561594	0.269928		T	ACT	0.0416667	0.690217	0.132246	0.0634058	0.177536	0.773551	0.490036	0.845109	0.0597826
T	ACA	0.902174	0.684783	0.0108696	0.134058	0.000905797	0.0606884	0.0380435	0.127717	0.00181159	0.230978		T	ACA	0.6875	0.970109	0.0842391	0.450181	0.935688	0.438406	0.963768	0.548913	0.650362	0.916667		T	ACA	1	0.462862	0.910326	0.577899	0.636775	0.678442	0.446558	0.268116	0.589674	0.777174		T	ACA	0.992754	0.975543	0.841486	0.673007	0.0289855	0.00181159	0.0163043	0.000905797	0.0914855
T	ACG	0.184783	0.0362319	0.00362319	0.0425725	0.252717	0	0.013587	0	0.207428	0.648551		T	ACG	0.270833	0.261775	0.485507	0.575181	0.522645	0.855978	0.785326	0.908514	0.987319	0.963768		T	ACG	0.707428	0.228261	0.616848	0.0235507	0.862319	0.816123	0.14221	0.804348	0.712862	0.242754		T	ACG	0.508152	0.985507	0.683877	0.0163043	0	0.00905797	0.00452899	0.00634058	0
I	ATC	0.943841	0.259964	0.0153986	0.609601	0.430254	0.576993	0.0262681	0.738225	0.924819	0.941123		I	ATC	0.92663	0.980072	1	0.998188	0.964674	0.999094	0.980072	1	1	0.957428		I	ATC	0.759058	0.189312	0.0688406	0.115942	0.00362319	0.0199275	0.431159	0.658514	0.103261	0.354167		I	ATC	0.0344203	0.162138	0.346014	0.868659	0.216486	0.382246	0.621377	0.118659	0.0108696
I	ATT	0.987319	0.76087	0.0887681	0.467391	0.391304	0.445652	0.212862	0.214674	0.973732	0.317029		I	ATT	0.925725	1	1	0.976449	0.769022	0.8125	1	0.740036	0.995471	0.775362		I	ATT	0.970109	0.843297	0.269928	0.102355	0.0452899	0.270833	0.430254	0.00181159	0.449275	0.634058		I	ATT	0.90308	0.577899	0.403986	0.188406	0.643116	0.902174	0.564312	0.865942	0.00362319
I	ATA	0.844203	0.211051	0.627717	0.716486	0.451993	0.662138	0.602355	0.587862	0.0353261	0.431159		I	ATA	0.945652	0.882246	1	0.999094	0.956522	0.990036	0.990036	0.934783	0.998188	0.839674		I	ATA	1	0.200181	0.305254	0.462862	0.0117754	0.148551	0.0842391	0.280797	0.110507	0.375		I	ATA	1	0.999094	0.540761	0.00181159	0.0842391	0.0597826	0.0344203	0.330616	0.140399
M	ATG	0.226449	0.00996377	0.0217391	0.0697464	0.0815217	0.0108696	0.764493	0.00362319	0.309783	0.947464		M	ATG	0.92029	0.985507	1	0.997283	1	0.836051	0.999094	0.987319	1	0.822464		M	ATG	0.388587	0.817935	0.299819	0.00905797	0.0507246	0.837862	0.0942029	0.484601	0.19837	0.990036		M	ATG	0.210145	0.769928	0.660326	0.0914855	0.134058	0.0652174	0.621377	0.281703	0.0797101
N	AAC	0.968297	0.113225	0.622283	0.134058	0.924819	0.359601	0.0163043	0.692935	0.90942	0.554348		N	AAC	0.586957	1	1	0.998188	0.995471	0.997283	0.999094	0.942935	1	0.866848		N	AAC	0.855072	0.708333	0.975543	0.682065	0.835145	0.183877	0.288043	0.128623	0.299819	0.0425725		N	AAC	0.730978	0.972826	0.458333	0.0543478	0.0253623	0.169384	0.00271739	0.00724638	0
N	AAT	0.581522	0.5625	0.350543	0.63587	0.259058	0.872283	0.723732	0.719203	0.819746	0.968297		N	AAT	0.824275	0.985507	1	0.984601	0.959239	0.958333	0.959239	0.759058	0.98913	0.617754		N	AAT	0.680254	0.999094	0.908514	0.696558	0.308877	0.0543478	0.389493	0.0153986	0.222826	0.782609		N	AAT	1	1	0.783514	0.013587	0.0869565	0	0.00815217	0.0434783	0.000905797
K	AAA	0.0217391	0.450181	0.013587	0.32337	0	0.0190217	0.000905797	0	0.0153986	0.484601		K	AAA	1	1	1	0.991848	1	0.999094	0.961051	0.92663	1	0.961051		K	AAA	1	0.90308	1	0.995471	0.703804	0.727355	0.578804	0.446558	0.282609	0.42663		K	AAA	0.997283	1	0.869565	0.988225	0.326993	0.375	0.980072	0.0253623	0.270833
K	AAG	0.0824275	0.0172101	0	0.137681	0.0108696	0.00905797	0	0.0543478	0.401268	0.660326		K	AAG	0.995471	0.999094	1	0.999094	0.995471	0.978261	0.996377	0.999094	0.999094	0.456522		K	AAG	0.997283	1	0.995471	0.873188	0.983696	0.415761	0.484601	0.42029	0.0751812	0.995471		K	AAG	1	0.998188	0.969203	0.983696	0.164855	0.386775	0.553442	0	0.00181159
S	AGC	0.183877	0.0625	0.46558	0.00634058	0.162138	0.744565	0.673007	0.398551	0.752717	0.26087		S	AGC	0	0	0	0	0	0	0	0	0	0		S	AGC	0.397645	0.949275	0.00543478	0.240942	0.250906	0.76721	0	0.0443841	0.480072	0.0552536		S	AGC	0.917572	0.996377	0.518116	0.998188	0.994565	0.972826	0.955616	0.893116	0.863225
S	AGT	0.336051	0.0181159	0.0978261	0.00271739	0.0407609	0.0914855	0.900362	0.227355	0.0335145	0.581522		S	AGT	0.000905797	0	0	0	0	0	0	0	0	0.0806159		S	AGT	0.339674	0.863225	0.513587	0.822464	0.27808	0.849638	0.067029	0.0978261	0.148551	0.00634058		S	AGT	1	1	1	0.00815217	0.450181	0.0643116	0.326993	0.817935	0.131341
R	AGA	0.109601	0	0.145833	0.179348	0	0.00452899	0.154891	0.177536	0.736413	0.65308		R	AGA	0.98279	0.981884	1	1	0.999094	0.994565	0.999094	0.902174	1	0.98279		R	AGA	0.999094	0.886775	0.850543	0.758152	0.138587	0.625	0.0615942	0.806159	0.466486	0.548007		R	AGA	1	1	0.991848	0.105978	0.0896739	0	0.000905797	0.0525362	0
R	AGG	0	0.00271739	0.0163043	0.497283	0	0.0389493	0.00634058	0.0923913	0.400362	0.303442		R	AGG	0.939312	0.994565	1	1	0.998188	1	0.991848	0.98279	1	0.57971		R	AGG	0.200181	0.765399	0.712862	0.0706522	0.971014	0.668478	0.250906	0.686594	0.434783	0.740942		R	AGG	0.993659	0.912138	0.521739	0.144022	0.0434783	0.0172101	0.0108696	0	0
A	GCC	0.548913	0.606884	0.252717	0.00815217	0.309783	0.816123	0.895833	0.383152	0.585145	0.79529		A	GCC	0	0	0	0	0	0	0	0	0	0		A	GCC	0.000905797	0.693841	0.856884	0.994565	0.999094	0.604167	0.417572	0.945652	0.934783	0.586957		A	GCC	0.0923913	0	0.997283	0.988225	0.991848	0.988225	0.983696	0.981884	0.973732
A	GCT	0.578804	0.00996377	0.973732	0.00543478	0.434783	0.282609	0.17029	0.934783	0.255435	0.144022		A	GCT	0	0	0	0	0	0	0	0	0	0		A	GCT	0.444746	0.241848	0.764493	0.826993	0.92029	0.589674	0.485507	0.116848	0.968297	0.669384		A	GCT	0	0.0398551	0.115942	0.748188	0.741848	0.861413	0.985507	0.907609	0.997283
A	GCA	0.754529	0	0.417572	0.00362319	0.147645	0.124094	0.120471	0.798007	0.0425725	0.724638		A	GCA	0	0	0	0	0	0	0	0	0	0		A	GCA	0.906703	0.757246	0.855978	0.849638	0.529891	0.851449	0.73913	0.507246	0.845109	0.499094		A	GCA	0.105978	0.996377	0.82337	0.356884	0.973732	0.987319	0.838768	0.873188	0.981884
A	GCG	0.013587	0.224638	0.0679348	0	0.0144928	0.048913	0.277174	0.459239	0.245471	0.0235507		A	GCG	0	0	0	0	0	0	0	0	0	0		A	GCG	0.189312	0.509964	0.905797	0.783514	0.913949	0.764493	0.529891	0.747283	0.980072	0.183877		A	GCG	0.0625	0.00815217	0.593297	0.610507	0.887681	1	0.971014	0.608696	0.921196
V	GTC	0.76721	0.150362	0.575181	0.199275	0.0869565	0.862319	0.72192	0.455616	0.998188	0.843297		V	GTC	0.950181	0.886775	1	0.997283	0.993659	0.999094	0.998188	0.988225	1	0.84058		V	GTC	0.167572	0	0.00452899	0.00271739	0.0561594	0.0190217	0.219203	0.00271739	0.248188	0.0208333		V	GTC	0.0289855	0.0108696	0.40942	0.147645	0.745471	0.724638	0.785326	0.466486	0.832428
V	GTT	0.256341	0.623188	0.980978	0.213768	0.290761	0.630435	0.141304	0.729167	0.835145	0.40942		V	GTT	0.596014	0.990942	0.984601	0.979167	0.86413	0.999094	0.888587	0.969203	1	1		V	GTT	0.347826	0.000905797	0	0.00362319	0.314312	0.0262681	0.52808	0.0144928	0.131341	0.558877		V	GTT	0.057971	0.0724638	0.350543	0.163949	0.525362	0.860507	0.902174	0.923007	0.428442
V	GTA	0.59058	0.967391	0.0498188	0.727355	0.389493	0.568841	0.14221	0.110507	0.809783	0.219203		V	GTA	0.883152	0.950181	0.991848	0.932971	0.918478	0.875	0.883152	0.875906	0.996377	0.352355		V	GTA	0.745471	0.137681	0.542572	0.0172101	0.104167	0.0108696	0.162138	0.0217391	0.0615942	0.606884		V	GTA	0.471014	0.0371377	0.855978	0.742754	0.80163	0.73279	0.842391	0.42663	0.803442
V	GTG	0.257246	0.588768	0.0289855	0.314312	0.667572	0.317029	0.380435	0.11413	0.500906	0.94837		V	GTG	0.544384	0.942029	1	0.928442	0.997283	0.997283	0.905797	0.894928	1	0.995471		V	GTG	0.875	0	0	0.00452899	0.00362319	0.220109	0.000905797	0.0253623	0.457428	0.0914855		V	GTG	0.748188	0.0163043	0.262681	0.585145	0.694746	0.209239	0.235507	0.708333	0.658514
D	GAC	0.720109	0.961051	0.750906	0.999094	0.985507	0.998188	0.990036	0.777174	0.663043	0.181159		D	GAC	0.994565	0.997283	1	1	1	0.980978	1	1	1	0.881341		D	GAC	0.264493	0.878623	0.775362	0.0498188	0.00362319	0.00271739	0	0.349638	0.0117754	0.0389493		D	GAC	0.78442	0.962862	0.1875	0.00181159	0.00362319	0.269928	0.0353261	0.000905797	0.155797
D	GAT	0.957428	0.997283	0.871377	0.970109	0.595109	0.966486	0.901268	0.884058	0.13587	0.554348		D	GAT	0.871377	0.968297	1	0.997283	0.980978	0.992754	1	0.548913	0.997283	0.967391		D	GAT	0.883152	0.486413	0.310688	0.0181159	0.325181	0.0778986	0.456522	0	0.143116	0.0525362		D	GAT	0.998188	1	0.890399	0.000905797	0.0416667	0.00815217	0.0416667	0	0.0652174
E	GAA	0.85779	0.514493	0.424819	0.911232	0.0661232	0.431159	0.683877	0.727355	0.192935	0.94837		E	GAA	0.897645	0.945652	0.999094	0.993659	0.997283	1	1	0.969203	1	0.941123		E	GAA	1	1	0.815217	0.000905797	0.237319	0.0144928	0.276268	0.0597826	0.63587	0.529891		E	GAA	0.992754	1	0.345109	0.0280797	0.0108696	0.000905797	0.000905797	0.266304	0
E	GAG	0.636775	0.942029	0.733696	0.153986	0.863225	0.852355	0.410326	0.844203	0.0117754	0.480978		E	GAG	0.725543	0.996377	1	0.995471	0.990036	0.998188	0.98279	0.998188	1	0.72192		E	GAG	0.867754	0.990036	0.0679348	0.54529	0.469203	0.00362319	0.00362319	0.00362319	0.0833333	0.701087		E	GAG	0.999094	0.945652	0.0932971	0.125906	0	0	0.00724638	0	0.00452899
G	GGC	0.00181159	0.694746	0.589674	0.0262681	0.639493	0.779891	0.528986	0	0.203804	0.000905797		G	GGC	0.14221	0	0	0.000905797	0.000905797	0.0181159	0	0	0	0		G	GGC	0.076087	0.613225	0.978261	1	0.995471	0.967391	0.999094	0.996377	0.23279	0.763587		G	GGC	0.347826	0.00181159	0.147645	0.89221	1	1	1	1	1
G	GGT	0.162138	0.192029	0.906703	0.309783	0.119565	0.0751812	0.106884	0.90942	0.0389493	0.0661232		G	GGT	0.0434783	0.883152	0	0.00452899	0.0208333	0.529891	0.255435	0.0271739	0	0.491848		G	GGT	0.108696	0.984601	0.962862	0.856884	0.48913	0.807065	0.398551	0.5625	0.740036	0.567935		G	GGT	0.863225	0.199275	0.993659	0.933877	1	1	1	1	1
G	GGA	0.0887681	0.270833	0.410326	0.0869565	0.776268	0.300725	0.0833333	0.479167	0.628623	0.441123		G	GGA	0.521739	0.67029	0.00271739	0	0	0.0144928	0.0317029	0	0	0.00996377		G	GGA	0.880435	0.867754	0.999094	0.981884	0.618659	0.92029	0.738225	0.726449	0.683877	0.00362319		G	GGA	0.902174	0.84058	0.992754	1	1	1	0.979167	0.999094	1
G	GGG	0	0.621377	0.618659	0.0923913	0.0425725	0.0679348	0.393116	0.0108696	0.000905797	0.057971		G	GGG	0.000905797	0.0987319	0	0	0	0	0	0.0525362	0	0		G	GGG	0.0190217	0.634964	0.844203	0.958333	0.990942	0.716486	0.421196	0.939312	0.250906	0.611413		G	GGG	0.0507246	0.0117754	0.902174	1	1	1	1	1	1
[truncated: 12 more columns]

## Sheet: Heatmap for codons in sites
Stop efficiency at the corresponging triplet while located in the ribosome sites								P-values for shuffled datasets exceeding experimental data of stop efficiency at the corresponging triplet while located in the ribosome sites
		Ribosome sites								Ribosome sites
		-2	E	P	A	2				-2	E	P	A	2
P	CCC	-0.00214408	-0.0040492	0.00501437	0.00777175	0.00920413		P	CCC	1	1	1	0.0144928	0
P	CCT	-0.000481988	-0.00841921	0.00756198	0.00737446	0.00891876		P	CCT	1	1	0.986413	0.0253623	0.00724638
P	CCA	-0.000154486	-0.0069012	0.00233973	0.0108497	0.00946915		P	CCA	1	1	1	0	0.00996377
P	CCG	6.90741e-05	-0.00535465	0.00510185	0.00113041	0.00843351		P	CCG	1	1	1	0.999094	0.000905797
L	CTC	0.0152105	-0.00279842	0.0124839	0.00712929	0.00917469		L	CTC	0.492754	1	0.747283	0.221014	0
L	CTT	0.0137155	-0.00477427	0.0144166	0.00247059	0.00659963		L	CTT	0.636775	1	0.11413	0.78442	0.291667
L	CTA	0.0111036	0.000181693	0.0102275	0.00840231	0.00731739		L	CTA	0.925725	1	0.754529	0.0824275	0.243659
L	CTG	0.0186656	-0.00564826	0.0143677	0.00359821	0.00899554		L	CTG	0.0326087	1	0.0389493	0.625	0.00543478
H	CAC	0.0143544	-0.00258359	0.0179758	0.0103212	0.00623109		H	CAC	0.811594	1	0	0.00271739	0.190217
H	CAT	0.0089179	-0.00421274	0.0146238	0.00760439	0.00386838		H	CAT	1	1	0.00996377	0.00362319	0.20471
Q	CAA	0.0179891	-0.00731043	0.0140613	0.00719089	-0.00309116		Q	CAA	0.265399	1	0.071558	0.0353261	0.985507
Q	CAG	0.0231121	-0.00507674	0.0124595	0.0116098	-0.00239634		Q	CAG	0	1	0.508152	0	1
R	CGC	0.022007	-0.00543556	0.0136089	0.00653276	0.0081467		R	CGC	0	1	0.106884	0.0932971	0
R	CGT	0.0186979	-0.0110854	0.011973	0.00685662	0.00904546		R	CGT	0.00362319	1	0.265399	0.0461957	0.00181159
R	CGA	0.0206338	-0.00723285	0.0181364	0.0128852	0.00858004		R	CGA	0.00634058	1	0.000905797	0	0.048913
R	CGG	0.0239785	-0.000913785	0.0126196	0.0118555	0.00798697		R	CGG	0	1	0.0923913	0	0.000905797
S	TCC	0.0176451	0.0560664	0.018901	0.001239	0.00563602		S	TCC	0.0335145	0	0	0.998188	0.350543
S	TCT	0.0192485	0.0606341	0.0168516	-0.00124946	0.00364448		S	TCT	0.00452899	0	0	0.998188	0.70471
S	TCA	0.0209314	0.074687	0.0122384	-0.00284709	-0.00462927		S	TCA	0.000905797	0	0.149457	0.999094	1
S	TCG	0.0246194	0.0651713	0.0159041	0.00139312	-0.00243199		S	TCG	0	0	0.000905797	0.986413	1
F	TTC	0.0116636	-0.00478699	0.0204965	0.00603372	0.00561781		F	TTC	0.967391	1	0	0.197464	0.0896739
F	TTT	0.0106157	-0.00436752	0.0110522	0.00142724	0.00261627		F	TTT	0.917572	1	0.542572	0.0778986	0.185688
L	TTA	0.0105432	-0.00790905	-0.00039313	-0.00276884	2.98009e-05		L	TTA	0.889493	1	0.931159	0.576087	0.610507
L	TTG	0.0203478	-0.00531595	0.00946616	0.0108516	0.00650786		L	TTG	0.00634058	1	0.929348	0	0.0199275
Y	TAC	0.0151141	-0.00371492	0.018203	0.0117095	0.00311216		Y	TAC	0.548007	1	0.013587	0	0.40308
Y	TAT	0.0111716	-0.00882981	0.00624104	-0.000142585	-0.00361154		Y	TAT	0.902174	1	0.140399	0.0317029	0.497283
*	TAA	0	0	0	-0.0152176	-0.00505708		*	TAA	1	1	0.980072	1	0.712862
*	TAG	0	0	0	-0.00264375	-0.00141383		*	TAG	1	1	1	0.955616	0.640399
C	TGC	0.0161013	0.0148572	0.011616	-0.0026768	0.00740446		C	TGC	0.297101	0.738225	0.777174	1	0.0552536
C	TGT	0.0161526	0.0119126	0.00340859	0.00374248	0.00242179		C	TGT	0.17663	0.568841	0.942935	0.136775	0.610507
*	TGA	0	0	0	0.0101463	0.00520775		*	TGA	1	1	1	0.000905797	0.188406
W	TGG	0.0174071	-0.00322326	0.0109036	0.0212215	0.0105859		W	TGG	0.129529	1	0.304348	0	0
T	ACC	0.021939	0.0117723	0.0185485	0.00950141	0.00472344		T	ACC	0	0.998188	0	0.406703	0.773551
T	ACT	0.0180542	0.00922666	0.0132569	0.0103279	0.00257979		T	ACT	0.0452899	0.984601	0.110507	0.0289855	0.871377
T	ACA	0.0213059	0.0101889	0.00469559	0.0108621	-0.00421086		T	ACA	0	0.971014	0.992754	0.00724638	1
T	ACG	0.0261693	0.0137621	0.0117967	0.0183683	0.00477785		T	ACG	0	0.970109	0.523551	0	0.471014
I	ATC	0.0155192	-0.0039981	0.0189221	0.00953696	0.00226854		I	ATC	0.47192	1	0.000905797	0.053442	0.682065
I	ATT	0.0116051	-0.00699575	0.00529683	-0.00377613	-0.0038393		I	ATT	0.769022	1	0.219203	0.77808	0.945652
I	ATA	0.0112833	-0.0096242	0.00267587	-0.00438907	-0.00279362		I	ATA	0.668478	1	0.356884	0.723732	0.750906
M	ATG	0.0249333	-0.00864105	0.0117415	0.00630344	-0.0006083		M	ATG	0	1	0.152174	0.0833333	0.679348
N	AAC	0.0165348	-0.00322478	0.0105218	0.0135611	5.20342e-05		N	AAC	0.473732	1	0.623188	0	0.598732
N	AAT	0.0123619	-0.0059394	0.000663961	-0.00218114	-0.00890615		N	AAT	0.803442	1	0.834239	0.252717	0.886775
K	AAA	0.0290529	-0.0154415	-0.00997897	-0.0127974	-0.0102139		K	AAA	0	1	1	1	0.980072
K	AAG	0.0300936	-0.00798727	-0.00217683	-0.000103552	-0.00277302		K	AAG	0	1	1	0.896739	0.706522
S	AGC	0.0184829	0.0759585	0.0190751	-0.00153455	0.000890526		S	AGC	0.0353261	0	0.00452899	1	0.984601
S	AGT	0.0214341	0.0551967	0.00974185	-0.00898594	-0.00475904		S	AGT	0	0	0.0996377	1	0.996377
R	AGA	0.0249877	-0.00785343	0.0030875	0.00519239	0.000805649		R	AGA	0	1	0.978261	0.185688	0.817935
R	AGG	0.026281	-0.00280359	0.0102793	0.0134207	0.00384635		R	AGG	0	1	0.686594	0	0.519928
A	GCC	0.0154578	0.0751028	0.00933011	0.00128909	0.00104018		A	GCC	0.288043	0	0.995471	1	1
A	GCT	0.0171666	0.0750963	0.00891838	0.00314282	-0.000250123		A	GCT	0.0679348	0	0.902174	0.901268	1
A	GCA	0.021662	0.10408	0.00695348	8.2752e-05	-0.0041863		A	GCA	0.00181159	0	0.990942	1	1
A	GCG	0.021479	0.0781545	0.00848138	0.00225525	0.00163906		A	GCG	0	0	0.947464	0.96558	0.983696
V	GTC	0.0148441	0.00242055	0.022153	0.00514481	0.000128077		V	GTC	0.653986	1	0	0.432065	0.991848
V	GTT	0.0135653	-0.00355113	0.0181665	0.000946978	0.00660815		V	GTT	0.690217	1	0	0.457428	0.0280797
V	GTA	0.016384	0.00187657	0.0184699	0.00155457	0.00495916		V	GTA	0.460145	1	0.00181159	0.759058	0.381341
V	GTG	0.0181538	0.0010048	0.0214058	0.00289294	0.00322833		V	GTG	0.100543	1	0	0.229167	0.209239
D	GAC	0.00746253	-0.00417282	0.0210972	0.0126252	0.00350656		D	GAC	1	1	0	0	0.559783
D	GAT	0.00554456	-0.00570551	0.0137362	0.00432299	-0.00416628		D	GAT	1	1	0.00362319	0.0126812	0.95471
E	GAA	0.0139661	-0.00616578	0.010882	0.009277	0.00255015		E	GAA	0.833333	1	0.443841	0.00271739	0.402174
E	GAG	0.0140414	-0.00376158	0.0150768	0.0136371	0.00158435		E	GAG	0.836051	1	0.0208333	0	0.42029
G	GGC	0.0187342	0.0310433	0.00661513	-0.00529045	0.00519623		G	GGC	0.000905797	0	1	1	0.163949
G	GGT	0.0171005	0.0224283	0.00555235	-0.0126289	0.00418743		G	GGT	0.0597826	0	0.944746	1	0.230978
G	GGA	0.0187647	0.0319073	0.00669981	-0.0116148	-0.00100492		G	GGA	0.0380435	0	0.992754	1	0.986413
G	GGG	0.0203654	0.0299565	0.00742268	-0.00967143	0.000700135		G	GGG	0	0	0.945652	1	0.879529

## Sheet: 2D codon heatmap
2-dimensional representation of stalling propensities with the corresponding codons located in the P- and A-sites
P\A		Codons located in the A-site
		CCC	CCT	CCA	CCG	CTC	CTT	CTA	CTG	CAC	CAT	CAA	CAG	CGC	CGT	CGA	CGG	TCC	TCT	TCA	TCG	TTC	TTT	TTA	TTG	TAC	TAT	TAA	TAG	TGC	TGT	TGA	TGG	ACC	ACT	ACA	ACG	ATC	ATT	ATA	ATG	AAC	AAT	AAA	AAG	AGC	AGT	AGA	AGG
P	CCC	-0.00734846	-0.0183525	-0.00519693	-0.0159274	0.00506021	-0.00202292	0.0131039	0.00322742	0.0053966	-0.00110145	0.00774179	0.0151181	0.00583391	0.00674198	0.00111422	0.00988731	-0.00243873	0.0206422	0.0391857	0.0133079	0.00154074	0.0201986	-0.00896907	-0.00294507	0.0124165	0.00845933	-0.0884145	-0.0258918	-0.0140562	0.0188648	-0.0289261	0.0169993	-0.00139177	-0.00377112	0.00636373	0.0121281	-0.00115499	0.0120305	0.0320422	0.0200811	0.0165618	0.0097419	-0.00190554	0.0296241	0.000900163	0.049202	0.0263705	0.0135429
P	CCT	-0.00887743	-0.00179026	0.00062929	-0.00565686	0.0252474	-0.00920713	-0.052759	0.00251475	-0.00214592	0.0134799	0.00851121	-0.00322672	0.0126776	0.00813701	0.0119052	0.0159583	-0.0129881	-0.0182346	0.000492707	0.00140702	-0.00226355	-0.00455302	-0.0139674	0.0160086	0.00384146	0.00497422	-0.0380037	-0.0688196	-0.0187768	0.010199	0.0387306	-0.00102484	-0.0092699	7.38734e-05	0.0217366	0.0687183	0.00914866	0.0178134	0.0193619	0.0116765	-0.0182314	0.0127113	-0.0115644	0.0264964	-0.0181366	0.000440842	0.0663444	0.00129002
P	CCA	-0.00968965	0.00641982	-0.0203133	-0.0161011	0.0196894	-0.0249597	0.0183149	0.0118783	0.00743115	-0.00217463	0.0143504	0.00921884	0.00436616	0.00120715	0.0201066	0.00738802	-0.00745179	0.0132467	0.00762921	0.0131033	0.0296123	0.0108486	-0.0131772	0.0217595	-0.00560345	0.0297174	-0.0508083	-0.00659054	-0.00634852	-0.0126694	-0.00377825	0.0236253	-0.0179208	0.0250849	0.0177031	0.0106826	0.000917075	-0.0373517	0.0319126	0.00961164	0.00416569	-0.0400304	-0.0275768	-0.00273933	-0.0133517	0.00250589	0.0188789	-0.0293613
P	CCG	-0.00827682	0.00317409	-0.000676836	-0.0190456	0.00259277	0.00116055	0.00436863	-0.00226336	-0.00411535	0.00692888	0.0284635	0.00150963	0.0012114	0.00292298	-0.00504931	-0.00132197	-0.00448298	0.0010608	0.0223315	0.0122963	0.0103092	0.000613278	-0.00999644	0.00130308	0.00852826	-0.00369645	-0.0249301	-0.0150413	-0.00979265	-0.00060974	0.0210054	0.00694886	0.00513559	0.00461461	0.0369111	0.0134342	0.0209189	0.0128028	-0.000684612	0.00879987	-0.00709653	0.0395423	4.1758e-05	-6.25625e-05	0.0127149	0.0238858	0.0161613	0.011907
L	CTC	0.0108368	0.0199574	0.0230257	0.00920093	0.0141016	0.0166004	0.0305164	0.0164064	0.0257399	0.0209556	0.0463034	0.0173827	0.0104737	0.0110686	0.0326451	0.0224114	0.00138427	0.0154111	0.0128289	-0.00360723	0.00642209	0.00594541	0.00382279	-0.00292093	0.000726432	-0.0172059	0.0632381	-0.0119693	0.00238305	0.0280549	0.0128618	0.0565008	0.0139806	0.0221689	-0.0065058	0.0543305	0.0111023	0.0137908	0.0207921	-0.00184627	0.00684804	0.0317371	0.0189913	0.0466768	0.00236295	-0.0199813	0.0113069	0.0188689
L	CTT	0.0257662	-0.0027715	0.0167801	0.0158093	0.0193019	0.00706598	-0.0165912	-0.0178894	0.0167249	-0.00708163	0.0326304	0.0181503	0.00481309	0.0320614	0.00776347	-0.0147254	0.00103937	0.0241611	-0.0329338	0.0270828	0.0226526	-0.00877134	-0.00899041	0.0192984	0.0423476	0.0196125	-0.0595584	-0.013857	0.0195295	0.00244018	0.0465624	0.0150214	-0.000828672	-0.0199976	0.0483016	0.0160599	0.0224355	0.00865695	0.0516398	-0.0272195	-0.0056495	0.00890012	0.0635579	0.00964959	-0.00748482	0.0132646	-0.0252888	0.0115641
L	CTA	0.015139	0.0209568	-0.00247281	0.0105249	0.0181201	0.0185007	0.0201013	0.00744813	-0.0302708	-0.0129191	0.00294858	0.0379019	-0.00512665	-0.00353403	0.00903127	-0.000888978	0.00356127	0.00431866	0.0184009	-0.00607582	0.00504431	-0.0305998	-0.0071394	-0.0156101	0.0187318	0.0143141	-0.0147809	0.0940863	0.0195696	0.0322604	-0.0142491	0.0172574	0.0261843	0.00515773	0.000725306	0.0415834	0.0621726	0.0693653	0.0286079	0.0160343	0.0104364	0.0245563	-0.0317315	0.0162611	0.00871455	-0.0132982	0.0134274	0.0292803
L	CTG	0.00692935	0.0210407	0.0161773	0.0226013	0.0178899	0.0368921	0.0593514	0.0267162	0.0202327	0.0282044	0.0412746	0.0406912	0.0137408	0.0084557	0.0204111	0.0100454	0.00406194	0.00892132	0.00776175	0.0246001	0.00933163	-0.00685352	0.029319	0.00626964	0.0245854	0.0529637	0.00608287	0.0369413	0.00305579	-0.0173872	0.00546146	0.00195123	0.0192157	0.0144768	0.0261277	-0.00388112	0.00317086	0.048445	0.027233	0.0141325	0.0278083	0.0537204	0.0467984	-0.0139692	0.0170744	-0.0113837	-0.0600574	0.0315976
H	CAC	0.0204234	0.0243028	0.0296297	0.000210887	0.0151319	0.00364809	0.0538066	0.000924572	0.0107226	0.0182713	0.0345488	0.01575	0.0159518	0.0249664	0.0524593	0.0174669	0.0114935	-0.0104029	0.0176296	0.0287332	0.0133215	0.00714183	0.000415026	-0.00623425	-0.00917057	0.0223997	0.0258292	-0.0102333	0.0139462	0.0261362	0.0490298	0.0431603	0.0194053	0.0163525	0.0155304	0.00796723	0.0294818	-0.021859	0.0353786	0.0130692	0.0387483	0.0313622	-0.017772	-0.0070264	0.00234735	0.0225832	0.0243956	0.0357285
H	CAT	0.0166527	0.0221376	0.0269934	-0.00310143	0.0111451	-0.00924878	0.0850211	0.0181742	0.0357021	0.0232215	0.0125132	0.0217813	0.0117831	0.0375199	0.00330064	0.0191519	0.0105684	-0.0290544	-0.0225519	0.0290088	0.0175502	0.0136802	-0.0184088	0.00101139	-0.0130813	-0.0439013	-0.0150142	-0.0198846	0.00259256	0.0142256	-0.00496866	0.0418086	-0.00983098	-0.0046079	0.0508521	0.00224661	-0.00576548	0.0286099	0.0284607	-0.00705896	0.0295705	-0.00714394	0.00673697	-0.0076481	0.00682422	-0.0365501	0.0496137	0.0645385
Q	CAA	0.0200964	0.01787	0.0226491	0.00549563	-0.00190671	-0.0047648	0.0276914	-0.0105431	0.0151255	0.0131739	-0.00714613	0.00704559	0.0113965	0.0146379	0.0257527	0.0229318	0.0121125	-0.00445724	0.00823883	-0.00856301	0.0120133	0.00264348	0.0150467	-0.0199833	0.0111301	0.0422138	-0.0293818	0.0422639	0.0262005	0.0126623	0.0272887	0.0456791	0.0127838	0.00855141	0.0559387	0.0300784	0.000466083	-0.000401436	0.00977782	0.0112175	0.0152067	-0.00772693	-0.00417381	-0.00747559	-0.0163041	-0.0184819	0.0431578	0.0439333
Q	CAG	0.00938646	-0.012368	0.0356345	0.0155001	0.0209383	0.016711	0.0238136	0.0225763	0.0187216	-0.0226972	0.0297308	0.0279726	0.0170038	-0.00266924	0.0138767	0.000852686	0.00225862	-0.0134619	0.00611395	0.0067799	-0.0156299	0.0134746	-0.0182864	0.0192968	0.00369569	0.0233228	0.045587	0.00952294	0.00108553	-0.0204342	0.0425998	0.0675054	0.0260598	0.0182512	0.0155553	0.0272669	0.00032731	0.0300403	0.045917	0.0101658	0.0313624	0.0310309	0.0183007	0.0293131	-0.0224407	0.0271986	0.0342222	0.0146691
R	CGC	0.0192446	0.0152749	0.0104738	0.00647996	0.0124049	0.0165092	0.0321968	0.000581309	0.00270717	0.038897	0.0648108	0.0184122	0.00855908	0.00302551	0.0357372	0.0176472	0.010838	0.00953011	-0.00553707	0.00748597	0.0151361	0.0202248	0.064913	0.0301017	0.00523466	-0.00660815	0.0136168	0.0367636	-0.0050634	0.0202929	0.0331497	0.0290536	0.00740812	0.0263772	0.053475	0.0141526	0.00564515	-0.00708396	0.0368495	0.00513176	0.0139945	0.0127811	0.0111894	0.0234567	0.00462391	-0.0164114	0.0197323	0.0394124
R	CGT	0.00978028	0.00708831	0.0231513	0.00557078	0.0132806	0.0117179	0.0275312	0.00347989	0.0284619	-0.00198529	0.0481879	0.0159976	0.00604613	0.0227489	0.00661699	0.0248787	-0.010816	0.00107048	0.00143573	-0.0111725	0.00761884	0.0211597	0.0097856	-0.00144228	0.0232958	0.0421888	-0.00595923	-0.00736727	0.0157142	0.027112	0.0452092	0.0442179	0.0108145	0.0245182	0.0321365	0.010427	0.0303349	-0.00148097	0.0266944	-0.0196474	0.0346204	-0.0508802	-0.00131627	0.0691098	0.00381477	0.0578802	-0.0146132	-0.00386204
R	CGA	0.0344364	0.0305926	0.0206045	0.0146855	0.00409662	0.0430721	0.00642428	0.030307	0.0283894	0.00836642	0.0194223	0.0137212	0.00698741	-0.0151711	0.0116933	0.0283108	0.00495284	-0.0141574	0.020122	0.0222546	0.0223964	-0.00766221	0.0283574	-0.00509073	0.0717267	-0.00100265	0.0601966	-0.0106533	-0.00877559	-0.0182794	-0.0162848	0.0319766	0.0250688	0.0329034	0.00342117	0.0140155	0.0420756	0.015378	-0.0366342	0.0485681	0.0399638	0.0310485	-0.00463352	0.0145317	-0.000705594	-0.00951837	0.0512939	0.0116084
R	CGG	0.0279525	0.0138232	0.0205617	0.0143109	0.0148547	0.0084729	0.00584377	0.0216051	0.0149523	0.0243326	0.00434329	0.0115708	0.00710129	0.0177134	0.0132032	0.0117283	0.00830387	0.0146349	0.0134851	0.00491456	0.00452217	0.00228784	0.0151898	0.0209066	-0.0204005	0.0162058	-0.0121367	-0.024101	0.00356925	0.000815171	-0.0232336	0.0123912	0.0163874	0.0243761	0.017477	0.0208422	0.0101779	0.032123	-0.0390402	0.0376546	0.0314975	-0.0471862	0.00759871	0.0525245	0.00960713	0.0180791	0.0158483	0.0181587
S	TCC	0.011678	0.0332034	0.0193937	0.00443641	0.030534	0.0165021	0.0552625	0.0096023	0.0165393	0.0320657	0.0211582	0.0413732	-0.000412881	0.0228657	-0.00350894	0.0208242	-0.00380876	-0.00656739	0.0115817	0.00422128	0.00949877	0.0361956	0.0226229	0.0122232	0.0370498	0.00288277	0.0358576	0.0443631	0.0138784	-0.010045	0.0645306	0.0189349	0.0117419	0.0052693	0.0377291	0.0345147	0.00199495	-0.0193118	0.0233135	0.0312361	0.0451125	0.0970422	0.0161265	0.0367821	-0.00432343	0.00827071	0.0540828	0.0413746
S	TCT	0.0155555	0.0132728	0.000197739	0.00508525	0.0262558	0.0421805	0.0720538	0.00311824	0.0283098	-0.00109246	-0.0142229	0.0284707	0.0205652	0.0106051	0.0756619	0.0279271	0.0182131	0.00107688	-0.0204121	-0.0149247	-0.00107861	0.0364391	-0.0118109	0.00878669	0.0367696	0.0248515	0.0836004	-0.0255393	-0.00460599	0.025534	0.10931	0.0284713	0.00358887	0.0392665	0.0283359	0.0288167	-0.011494	0.0285964	0.017971	0.0295133	0.0241484	-0.00647684	-0.0256658	-0.0107049	0.0122123	-0.0193306	0.0499942	0.0400836
S	TCA	0.0233483	0.00631155	0.0168852	-0.00295317	0.0097257	-0.0053153	-0.0131035	0.00160449	0.0608532	-0.0187083	0.00677179	0.0255057	0.0312523	0.0224969	0.0146726	0.0376453	0.000855583	-0.0210972	-0.0298909	-0.0334318	-0.00915197	0.0165079	-0.00588118	-0.0151194	-0.00141487	0.017122	0.00334385	0.0258	-0.000418539	0.0255088	0.0523603	0.0319223	0.0352228	0.0223671	0.0283954	-0.00791221	0.0271164	-0.00221692	0.0031073	0.0260151	0.040252	0.0681899	0.0215402	-0.0370976	-0.0215637	0.00337272	0.0683976	0.0133404
S	TCG	0.0190608	0.0212122	0.019854	4.47138e-05	-0.00547896	0.0334878	0.0312129	0.00805768	0.0138253	0.0261386	0.0208307	0.0194844	0.0256217	0.00161491	0.0115386	0.0168312	-0.00609662	-0.0151808	0.0464132	-0.00191178	0.0402524	0.0143342	0.0151534	0.0205565	0.0326854	0.00498579	0.0115894	0.0688745	-0.00242774	-0.0126127	0.0186732	0.0268302	0.0295802	-0.0133335	-0.0131113	0.0304394	0.0235755	0.0019422	0.0287219	0.000179855	0.0263196	0.00194044	0.00557319	0.020284	0.0153658	-0.00881754	0.0575277	0.036669
F	TTC	0.0128627	0.0409787	0.0458111	-0.0097502	0.0141294	0.0671177	0.0312676	-0.0162621	0.0388432	0.00343561	0.0440863	0.0228413	0.0148641	0.0417075	0.0109685	0.00592359	0.0365941	0.0262692	-0.0305663	0.0335195	0.0277539	-0.00884865	0.0320375	0.0220511	0.0311591	0.0208286	-0.0434455	0.0202904	0.00758133	0.0396497	-0.0208645	0.0587119	0.0239492	-0.00653101	0.0452495	0.0142034	0.00770291	0.0149101	0.0303677	0.0363705	-0.00559908	0.0328062	0.0334694	-0.05052	-0.00734624	0.04785	0.0292335	0.00277389
F	TTT	0.0313676	0.0264471	0.00667912	-0.00548824	-0.015081	0.075788	0.0791652	0.0084176	0.0110588	-0.00421866	-0.0327668	0.0276862	0.0126073	0.0212034	0.0147158	0.0211503	0.0105727	0.0317724	-0.0095452	0.0157506	0.0271034	-0.0236793	0.0253654	0.0353206	0.0298462	-0.0258336	-0.0349772	-0.029355	-0.0131247	0.0231474	0.00725845	0.0484698	0.0196743	0.0398661	0.0237842	0.00448642	0.0308047	-0.0684313	-0.0255021	0.0192157	0.00359547	0.0307803	-0.018336	0.00577333	-0.0340612	0.0105476	0.0423882	-0.0149518
L	TTA	0.0352392	-0.0299582	-0.0423917	0.0239782	0.0372104	0.00741028	0.0381369	-0.0154317	0.0193784	-0.00768782	0.0233664	0.00281253	-0.0197727	0.0115114	0.0257661	0.00159045	0.0219688	0.017926	0.0163172	-0.000787762	-0.0321443	0.00240772	0.00456754	0.0168736	-0.0307012	-0.0813204	-0.132532	-0.00539144	-0.0146105	0.000476383	-0.02272	0.0154599	0.0248679	0.0199242	0.0314434	0.0273461	-0.00344671	0.0500496	-0.0031314	0.00238545	0.00623964	-0.0150088	-0.0296732	0.000138073	-0.0484244	0.0231483	-0.102932	0.0172804
L	TTG	0.00854998	0.0363054	0.0131099	-0.00140419	0.00747543	-0.0069427	0.0243517	0.0190324	0.0161351	-0.00128616	0.0349438	0.00805646	-0.0200433	-0.0187067	0.0286403	0.0283908	-0.00711028	0.0234081	0.0239641	0.018505	0.0140316	0.0257787	-0.0509451	0.0738505	0.0207615	0.0585382	-0.00770512	0.0224713	0.0111392	-0.0261219	0.0296229	0.00310819	-0.00319598	0.000842145	0.00783638	0.0064084	0.0197179	-0.0148847	0.0112257	-0.00447571	-0.020738	-0.000358367	-0.0512092	0.052949	0.0151816	0.0521056	0.0365585	0.0408914
Y	TAC	-0.0059381	0.027093	0.0185935	0.0185866	0.0129733	0.0221123	-0.0325284	0.0181029	0.0507157	0.0736852	0.00581938	0.0249401	-0.00495152	0.00323803	0.0127931	0.000387127	0.00776882	-0.0108592	0.0305471	-0.0163656	-0.00840014	-0.00275235	0.0277605	0.0711314	0.039028	0.0422721	0.0234209	-0.0210694	0.00872391	0.0596586	0.0928368	0.0447295	0.00104988	0.0263361	0.0252271	0.0438475	0.0103659	0.0502183	0.0585956	0.0237591	-0.00291168	0.03048	0.0153367	-0.0319748	0.0323886	0.00544034	0.00783351	0.0561149
Y	TAT	0.00863896	0.000129302	0.0356387	0.0243589	-0.000266336	0.0132406	0.0315057	-0.00970972	0.0469288	0.00278632	-0.0334775	-0.0127464	0.0148124	-0.0120863	0.0309289	-0.0158118	0.00491288	0.0227091	-0.0240235	0.00897667	0.0246973	0.00873611	-0.00147227	0.0358208	0.0126617	-0.0448205	0.0119805	0.0124111	-0.0274785	0.0122359	-0.00415278	0.0851441	-0.00728284	-0.0177005	0.00833001	0.00174967	0.0352816	0.00693415	0.0298139	0.0192107	0.0180919	0.0040252	-0.0315414	3.17316e-05	0.0464575	-0.0596124	-0.0275519	0.00498225
*	TAA	N/A	N/A	N/A	N/A	N/A	N/A	N/A	N/A	N/A	N/A	N/A	N/A	N/A	N/A	N/A	N/A	N/A	N/A	N/A	N/A	N/A	N/A	N/A	N/A	N/A	N/A	N/A	N/A	N/A	N/A	N/A	N/A	N/A	N/A	N/A	N/A	N/A	N/A	N/A	N/A	N/A	N/A	N/A	N/A	N/A	N/A	N/A	N/A
*	TAG	N/A	N/A	N/A	N/A	N/A	N/A	N/A	N/A	N/A	N/A	N/A	N/A	N/A	N/A	N/A	N/A	N/A	N/A	N/A	N/A	N/A	N/A	N/A	N/A	N/A	N/A	N/A	N/A	N/A	N/A	N/A	N/A	N/A	N/A	N/A	N/A	N/A	N/A	N/A	N/A	N/A	N/A	N/A	N/A	N/A	N/A	N/A	N/A
C	TGC	0.000982439	0.00506487	0.0369594	-0.0101909	0.0151857	0.00125663	0.0466851	0.016928	0.013105	0.0225317	0.0148688	0.00461525	-0.00694965	0.0039885	0.0296683	0.0177793	0.00195835	0.0250669	-0.00951017	0.0127855	-0.00394242	0.0163253	0.000620557	0.00353709	0.00192009	0.0284308	0.079038	0.0293006	-0.00187118	0.0466304	0.0875363	0.0120238	0.00567117	-0.018391	0.0101271	0.0538177	0.0218036	-0.0176492	0.010482	0.0432843	0.0172226	0.0515095	0.0241239	0.0217863	-0.0126445	0.0244683	0.0643354	0.0209891
C	TGT	-0.0146777	0.0111812	0.00922876	0.0176316	0.00884511	0.0288355	0.0118468	0.022188	0.00380282	-0.000217173	-0.0203415	0.00378718	0.00101487	-0.027628	0.0536728	-0.00325447	0.0153798	-0.018445	-0.0136374	-0.00634254	-0.0200484	-0.0206717	-0.00817045	-0.00977929	0.00655726	-0.00752573	-0.00688607	-0.0178165	0.00378319	-0.0119202	0.0160674	0.00106689	-0.000701892	0.0106214	0.0401182	-0.0292709	0.0381282	0.0392728	-0.0381237	0.0305828	-0.0179509	0.0319902	0.0810859	-0.050192	-0.0430838	-0.0381569	0.0262213	0.016168
*	TGA	N/A	N/A	N/A	N/A	N/A	N/A	N/A	N/A	N/A	N/A	N/A	N/A	N/A	N/A	N/A	N/A	N/A	N/A	N/A	N/A	N/A	N/A	N/A	N/A	N/A	N/A	N/A	N/A	N/A	N/A	N/A	N/A	N/A	N/A	N/A	N/A	N/A	N/A	N/A	N/A	N/A	N/A	N/A	N/A	N/A	N/A	N/A	N/A
W	TGG	0.0011938	0.00249239	0.00939483	0.0156422	0.0120191	0.0165258	0.0312189	0.0145815	0.00133122	0.0403649	-0.00880235	0.0349013	0.0041327	0.0202612	-0.00263326	0.0124356	0.00372483	0.0185681	0.0185315	8.904e-05	0.004484	0.0124577	0.00641769	0.000569281	0.0229536	0.002028	-0.00583137	0.00848114	-0.00568205	-0.00458821	0.0553254	0.0244474	0.0246128	0.016066	0.0189891	0.0381697	-0.0195048	0.00406431	0.00333034	0.00254024	0.0343075	-0.0163172	-0.0519207	0.0198976	0.0174834	-0.00586862	0.00174625	0.012185
T	ACC	0.0168219	0.0257924	0.0172368	0.00841761	0.0230429	0.00424315	0.0741928	0.0176102	0.0307128	0.00683436	0.0397262	0.0186113	0.00832443	0.0196022	0.0358157	0.0205334	0.0157526	-0.0112833	-0.0075496	0.0251549	0.000594573	0.0439295	0.0544067	0.0428701	0.0487891	-0.0012115	-0.0238186	0.0762147	-0.00334829	0.00762557	0.054505	0.0425896	-0.00973983	0.0125832	0.0161305	0.0176461	0.0275851	0.0029294	0.0329286	-0.00450473	0.0705849	0.0312872	-0.0244771	0.00391274	0.0199861	-0.0104554	0.0148657	0.0144337
T	ACT	0.000948935	0.0342432	0.0223215	0.0102145	0.00139468	-0.000478221	0.106684	-0.0323971	0.00627276	0.00279507	0.0267284	-0.0048539	0.0210412	0.0434811	0.0241995	0.0244217	-0.0156912	0.00563973	-0.00762608	-0.000632289	0.0255159	0.0161612	0.0830325	0.0246447	0.0304757	-0.000696499	0.0516521	-0.00619409	0.00894646	-0.00109602	0.0267062	0.0495771	0.0260825	0.0152799	0.0339003	0.0272888	0.0256516	-0.0225062	-0.0198588	-0.0609227	0.0196499	0.00948565	-0.000124062	-0.0365983	0.0326546	-0.0122151	0.00171911	0.040663
T	ACA	0.00896393	0.000934348	-0.00263503	-0.00335901	0.011436	0.0283348	0.0240299	-0.00487702	0.0234201	-0.00793353	0.0102275	-0.00527462	0.0137062	-0.0201621	0.0345206	0.0184416	-0.0054239	-0.0257292	-0.030181	-0.0174388	0.0402589	0.0020363	-0.00866097	0.0160634	-0.00770779	0.000637542	-0.0364989	-0.0301808	0.0050182	-0.0153422	-0.00299698	0.0120124	0.0283854	-0.00112038	-0.00256078	0.00981975	-0.00403723	-0.0170122	0.00244468	0.00604998	0.0265223	-0.0354199	-0.0152841	-0.00925216	0.00713563	0.0142238	-0.0513261	0.0165924
T	ACG	0.0197678	0.0164592	0.0158886	-0.00524943	0.0171657	0.00991867	0.0228621	0.0254034	0.025742	0.0230144	0.0299618	0.0488959	0.00606107	-0.00748048	-0.00385239	-0.00304854	-0.0115818	-0.0119179	-0.00308766	0.00759993	-0.00465918	0.01262	0.0203077	0.00711666	0.00898191	-0.0256597	-0.0856	0.0114453	-0.0121049	0.00279696	0.0167557	0.0265319	0.0244369	0.0336329	0.0336954	0.0368097	0.00277145	0.0221846	-0.0162299	0.045896	0.0414613	0.0736395	-0.00816462	0.0163786	-0.00181445	0.0109064	0.06904	0.0328457
I	ATC	0.0149327	0.0275646	0.0468101	0.00772554	0.00676741	-0.00806685	-0.00621367	-0.00902208	0.0137262	0.0280134	0.0507038	0.0352296	0.0117006	0.0489299	0.0115472	0.037337	0.0145792	0.00220619	-0.0419925	0.0104398	0.0371628	-0.00330098	0.0264066	-0.0176057	0.0375733	-0.0112306	0.0318732	0.144016	0.0289721	0.0705228	0.0801715	0.043322	0.00225266	0.0312108	0.0264429	0.0203304	0.0201291	0.0282354	0.0247103	0.012568	0.0394243	0.0597581	-0.0229171	0.0067185	-0.00731316	0.0891225	0.00802194	0.00120173
I	ATT	0.0216478	-0.0196811	0.0510835	-0.0143428	0.0238432	-0.0441486	-0.0445391	-0.0257476	-0.01101	0.0190201	-0.0174787	-0.014006	0.0492377	-0.00968979	0.0414651	0.0333012	0.0218633	-0.0368221	0.0519002	0.0266952	0.0122347	0.0498702	0.000619535	0.00848792	0.00800219	-0.00606329	0.00474863	-0.0146372	0.0137452	0.0284095	-0.0568431	-0.0097636	-0.0287934	0.0494896	0.0249362	0.0259868	0.0174509	0.00674942	-0.0430607	-0.00943397	0.0221295	-0.0387104	-0.0062789	-0.0113248	0.0153087	-0.0505403	-0.0354522	0.0186314
I	ATA	0.0194149	-0.0155338	0.00486038	0.0559379	0.0241772	-0.0028909	-0.0418855	0.0138564	-0.0136723	-0.0253933	0.0193479	0.0115634	0.0375741	0.0306378	0.0332972	0.0315836	0.0193439	0.00458272	-0.0400435	-0.0347493	0.00053919	-0.00473089	0.00737456	0.0409092	0.0452331	-0.0411868	-0.0339704	0.0283597	-0.00467591	-0.0229674	0.0244177	0.0336933	0.0233956	-0.0297028	-0.0555189	0.0133593	0.0132029	-0.000814539	0.000773908	-0.00500536	0.000229271	-0.0472344	-0.0269089	-0.0222777	0.0250418	-0.102829	-0.0337701	0.0741108
M	ATG	0.0190419	0.0144426	0.0274955	0.00638769	0.00607533	0.00550808	0.0515477	0.0654259	0.0250189	0.0492222	0.02915	0.030209	0.028136	0.0532811	-0.00419535	-0.00122391	-0.0263891	0.00685012	-0.0156369	0.00754717	0.011208	0.0366282	0.0119606	0.0424975	-0.0428463	0.0411085	-0.0389068	0.0434914	0.0059939	-0.00499872	-0.00655297	0.00357778	0.0362412	0.0354981	0.0104761	0.0394134	0.0398319	0.0325956	0.0873641	0.0188302	0.040552	-0.0383474	-0.0288977	0.0201365	-0.00102566	0.0141523	-0.000528893	-0.040597
N	AAC	0.0118605	0.00944284	0.020092	0.012887	0.0253636	-0.00779236	0.0272076	0.0484305	-0.00568467	0.0485172	-0.00984974	-0.00700291	0.0142585	-0.0158427	0.0148729	0.00128298	0.0146418	-0.00967021	0.0141626	0.00679852	0.00585205	-0.0289216	0.0639943	0.0195196	0.00573846	-0.038415	0.0704011	-0.0171239	0.00605278	0.000566376	-0.0479643	0.0345443	0.0012032	-0.0116914	-0.00637878	0.0221963	0.0330972	0.00677868	-0.00165339	0.0190096	0.00829354	0.0222549	0.00911591	-0.00780059	0.0154273	0.0134657	-0.00355256	0.0131763
N	AAT	0.00572625	0.0109162	0.010464	-0.000243171	0.0138772	0.00805614	-0.00417162	0.0153061	-0.00370466	0.00308684	-0.0131552	0.00468364	-0.00334829	0.00833166	-0.0320178	-0.00789175	9.85289e-05	0.000356349	-0.0531287	-0.0531066	-0.0323471	-0.0189738	-0.0117066	-0.0352574	-8.12626e-05	-0.042359	0.0478905	-0.0297591	0.00333091	0.0112902	0.0305045	-0.00314642	0.0268733	0.0444115	0.00281215	0.0250221	0.0103145	0.00171692	-0.030901	-0.0441115	0.00513469	-0.0752335	0.00558414	-0.0147802	0.0158308	-0.0392831	0.0204134	0.0308189
K	AAA	0.0131366	-0.0558269	0.0340316	0.00601562	-0.0126277	0.00995793	-0.0392375	0.0847746	-0.00673464	-0.0119661	-0.00599496	-0.015067	0.000301361	0.00647897	0.0300956	0.00158429	0.0150858	-0.0255898	0.00340311	-0.0115879	0.0137028	0.00586589	-0.0585141	-0.052275	-0.00405264	-0.0265512	-0.0443136	-0.0989194	-0.0260472	-0.00646854	0.0342587	-0.00660513	-0.0249557	0.0101461	-0.0114238	0.0233364	-0.00639764	0.0125737	-0.0541166	-0.00347912	-0.0372453	-0.029587	-0.0265301	-0.0331581	-0.023473	-0.0407423	-0.0115219	-0.0379996
K	AAG	-0.000867396	-0.0107707	0.00749478	-0.0134608	-0.0150733	-0.0339079	-0.0158071	0.00128125	0.00956941	-0.00716011	-0.00988279	-0.00881358	0.0067752	-0.00804073	-0.0143389	0.00735483	0.0157641	0.0204933	-0.033619	0.027383	-0.0265224	0.0156212	0.041034	0.00436741	0.00832183	-0.0153991	-0.0414818	-0.00629299	0.0421871	0.00378552	0.00772439	0.0221857	0.00335283	0.00727748	-0.0154156	-0.0125518	-0.0461754	-0.0438948	0.0111701	0.0107185	-0.0126255	-0.0312652	-0.0140907	-0.0326874	-0.00535054	-0.0263766	-0.00730204	-0.00815007
S	AGC	0.0232457	0.0278848	0.0163152	0.00835815	0.0304766	0.021403	0.0441768	0.0240146	0.00319378	-0.0158229	0.0253741	0.0442411	0.00277422	-5.43491e-05	0.0400687	0.0202896	0.0161101	0.0417308	0.025233	0.0152156	0.00700901	0.011279	0.0516242	-0.000415618	0.0438015	0.0106609	0.0515146	-0.0207184	-0.0157961	0.0292023	0.065445	0.042342	0.0324806	-0.000243612	0.0547076	0.017746	-0.0183766	-0.0329171	0.0809261	0.0173958	0.0415543	-0.000816041	0.0306533	0.0247567	0.0236653	0.0118844	-0.00569644	0.0647906
S	AGT	0.00126667	-0.0223538	0.024102	0.0211297	-0.0239977	-0.0185487	0.00440964	-0.0350734	0.00727945	0.0121933	0.00648277	0.0202795	0.00224845	0.00711412	-0.00342528	0.00583274	0.00351115	0.0134384	-0.0100622	0.0149953	4.94679e-05	-0.0226186	0.0650071	0.0202566	0.00567552	-0.0208876	-0.0221084	0.019429	-0.00384778	0.0646235	0.0592717	-0.00456512	0.0231426	0.0354176	0.0255892	0.0197029	0.0182398	0.00293957	0.0359395	0.0492847	-0.0143144	-0.0104341	0.0212957	-0.00133507	-0.0201183	-0.00139818	-0.00442334	-0.0101933
R	AGA	0.0169019	-0.00366283	-0.01708	0.00684327	0.0102029	0.0135775	-0.010706	0.0103287	0.00363013	-0.0189831	-0.00954231	-0.000972378	-0.00580664	0.0446354	0.0202533	-0.000631457	-0.00901031	-0.0244602	0.00098266	0.0122383	0.00123112	-0.0154348	-0.0300635	0.0166243	0.000518303	-0.0129897	0.0160734	-0.0303016	-0.00761946	0.0123458	-0.0229668	0.0177572	0.00201916	0.030373	-0.0191513	0.021172	-0.00189517	-0.0184942	-0.0202284	-0.0150607	-0.00148717	-0.0281349	-0.00315481	0.0477609	-0.0116986	-0.0277792	-0.0244231	0.0217201
R	AGG	0.0109375	0.00383545	0.0106532	-0.0042608	0.00602781	-0.0071174	-0.000396044	0.0141613	-0.00384765	-0.00403175	0.0192731	0.0135897	0.022333	0.00702553	0.0342199	0.00810785	0.00674429	0.00869793	0.00962045	0.0208476	0.00640218	0.0198814	0.0347807	0.0122284	-0.00388093	0.0457437	-0.0128768	0.0534963	0.0126212	0.00355954	0.0320309	0.0202661	0.0129101	0.0338505	0.0417425	-0.00855558	0.0185112	0.0153469	-0.00749527	0.0290018	0.0207711	0.00316032	-0.0178891	0.0573971	-0.0248118	0.0209845	0.000475284	0.0257197
A	GCC	0.00376471	0.0119432	0.0173185	-0.00134957	-0.00373061	-0.0227018	0.0131952	0.0126294	0.0119915	0.00580369	0.00611252	0.0201518	-0.0049801	0.0054194	0.016517	0.0167089	0.000933399	-0.0136215	-0.00916278	-0.0132173	0.0062364	0.00801417	0.0296226	0.0374137	0.0187098	0.0102993	0.0323313	0.0327042	-0.0119706	-0.014243	0.0490263	0.0344063	0.0170092	0.0251592	-0.00492499	0.0268664	0.0111095	0.0125449	-0.0148985	0.0191546	0.012499	0.0419148	0.00234665	0.0217936	-0.00780534	0.0125898	0.0186997	0.00140156
A	GCT	0.00183365	0.0149706	0.0111959	0.00428753	-0.00901495	0.00924675	-0.0249639	0.00597892	0.00736024	0.0329231	0.015273	0.00810479	0.0057306	0.0162089	0.0215562	0.0159953	-0.000323006	-0.0125034	-0.00856969	0.00350182	0.00128773	-0.0102078	-0.00685215	0.00307915	0.0386481	0.0147451	0.00720966	0.00537263	-0.015197	-0.0309437	-0.0155865	0.0435939	0.0103698	0.0187043	0.0482052	0.0234408	0.0314161	0.0183073	0.009517	-0.0188608	0.0302901	0.0130724	-0.0187064	-0.0177056	0.0172493	-0.00480507	0.0100646	0.00099889
A	GCA	0.00865554	-0.0142915	0.0104642	-0.00256981	0.0217664	0.014358	-0.021672	-0.00182417	0.020017	-0.0219893	0.0476259	0.0422849	0.00739657	0.00572439	0.0219242	0.0175711	0.00702535	-0.013279	-0.0323126	-0.0204962	-0.0073407	-0.0116448	-0.0108055	0.0322965	0.02983	-0.0218832	-0.0549534	-0.006039	0.00239261	0.0326001	0.0118824	-0.00427457	0.00714592	0.00882575	-0.00191656	0.0394301	0.00872536	-0.00392759	0.0299767	0.0248905	0.00670723	-0.0215191	0.0113814	-0.00055467	-0.019578	-0.00214444	0.0511236	0.0285632
A	GCG	0.00481942	0.0222678	0.00403699	0.000161453	-0.0101555	0.00899737	0.0381559	0.00315999	0.0025882	0.0287389	0.00739843	0.00433133	0.01328	0.0202551	0.0329407	0.0283181	0.00667483	0.00441368	-0.0202354	-0.00871841	0.000510529	0.0111296	-0.000269248	-0.00149658	-0.0174363	0.0709818	-0.0239291	0.00817269	-0.0163099	-0.000855317	0.0526435	0.0113335	-0.00605681	0.0102646	0.0165511	0.013474	0.0194886	0.0195018	0.0347671	-0.017159	0.011157	0.0311217	-0.0608802	0.00283091	0.0140857	-0.0155334	0.0211543	0.02597
V	GTC	0.0228229	0.0350335	0.0489908	0.0185269	0.0229642	0.03172	0.0222486	0.0266842	0.0233741	0.0111848	0.0103609	0.0132208	0.0107957	0.00755194	0.0505163	0.0236306	0.0258055	0.0154514	0.00138205	-0.00662459	0.0409034	-0.0159989	-0.0044525	0.0420005	0.00119063	0.0204794	-0.0529588	0.0507015	-0.00381555	0.0390752	0.0745113	0.0522237	0.0317248	0.0464336	0.014161	0.0416283	-0.02027	0.00425562	0.0773377	0.0275417	0.0530316	0.013237	0.0167352	-0.0114837	-0.00413633	0.00915879	0.0700335	0.0287388
V	GTT	0.0400032	0.0316655	0.0255484	0.0255076	0.0155865	0.0274172	0.00080574	-0.0244361	0.0140746	0.033927	0.0033761	0.0312703	0.0189276	0.0501998	-0.029246	0.0416176	0.0106883	0.0507866	0.00463951	0.00770288	0.020801	0.0149302	0.0213556	0.0135806	0.0290259	0.0529835	0.0971883	-0.0614749	-0.00213803	0.0142004	0.0532029	0.0197291	-0.00252163	0.0135409	0.00578531	0.0783642	-0.00264107	-0.0136729	0.0384283	-0.00512766	0.097299	0.0304516	-0.045343	0.022944	0.00547245	-0.0645862	0.00810029	0.0378678
V	GTA	0.0423262	0.031701	0.0122089	-0.0136889	0.00114642	0.026696	0.0475444	0.0272675	0.0162419	0.00285048	0.0190677	0.051159	0.0217226	0.00579958	0.0458963	0.0216914	0.0258106	0.00056934	-0.00471666	-0.0145141	0.00263913	0.00493849	0.0271044	0.0527461	0.0271532	0.0217714	-0.00471277	0.0379169	0.013698	-0.00490514	0.108114	0.0569084	0.00361267	0.00415728	0.0429719	0.00584743	0.0382112	-0.0217265	0.00560106	-0.00427574	0.0482913	-0.0172092	-0.0275629	0.0331975	0.00422477	0.0272372	0.00607739	0.0336192
V	GTG	0.0140455	0.0215589	0.0112552	0.0176287	0.0260995	0.0190786	0.0190951	0.0076824	0.00663295	0.0469464	0.0370869	0.0208141	0.0330354	0.0194145	0.0286115	0.00415769	0.0031437	-0.00964025	0.0108339	0.0300268	0.0146487	0.00999815	0.0830993	0.0687358	0.00128408	0.113392	0.0221607	0.0139954	-0.00621881	0.0230225	0.0243097	0.0748145	0.0223152	0.0387414	0.0390139	0.0864616	0.0392218	0.00074186	0.0584565	0.0385182	0.0213051	0.0233211	0.0668154	0.0224198	-0.0317398	0.0116574	0.0489876	0.0328978
D	GAC	0.0133922	0.00981677	0.0435754	0.0154265	0.000262171	-0.00124311	0.0377054	0.0108469	0.0368702	0.0162116	0.0299392	0.0337959	0.0117678	0.0332584	0.0146361	0.0180611	-0.00502013	0.0166477	-0.039645	0.0163994	0.0249534	-0.00264748	-0.00218399	0.0903823	0.064018	-0.00960219	0.0310089	0.0405468	0.00110901	0.0427798	0.0292877	0.00324475	0.013625	0.00645926	0.0661978	0.070887	0.0574194	0.00142107	0.0102215	0.00584108	0.0039704	0.0921226	0.0078051	-0.0232386	0.0261814	0.00844043	0.0579145	0.0383071
D	GAT	0.0092031	0.015006	0.039219	0.00963159	0.011012	0.010147	-0.000999546	0.0104741	0.0178829	0.0231882	-0.0103273	0.0047685	0.0267534	0.0347454	0.00359955	0.0296066	0.0199072	0.00303037	-0.00677062	-0.0172981	-0.0109736	0.0174716	-0.0419934	-0.00174252	0.0608338	0.00946745	0.0817868	0.0128068	-0.00677584	0.00512729	0.0909739	0.0606724	0.0219996	-0.00784192	0.0351514	0.0156954	0.0186011	-0.008629	0.0319293	-0.00315311	0.00439413	-0.0728196	-0.0306028	-0.0157137	0.00683398	0.0180333	0.138009	-6.76043e-05
E	GAA	0.0310116	0.0093747	0.00915363	0.0149144	-0.00436013	0.0195441	0.0331592	0.00916254	0.0203815	-0.0168422	-0.0339495	0.00176295	0.033993	-0.00839862	0.0329358	0.0330251	-0.00981696	-0.0166557	0.01477	-0.0174414	0.00551199	-0.0369297	-0.00861335	0.00364908	0.0316027	-0.0410612	-0.0199517	0.0102357	0.0298613	0.0181422	0.0136216	0.0645135	0.0153816	0.0429748	0.0423289	0.0583168	0.0177368	-0.00771791	0.0137919	0.0369542	-0.013117	-0.0494351	-0.000613441	-0.0301021	0.00369542	0.0529735	0.0374765	0.0130004
E	GAG	0.0281063	0.0137277	0.0444383	0.0414219	0.0314176	0.0295094	0.0768987	0.00424162	0.0394897	0.0666249	-0.0212049	0.0434353	0.00591664	0.00231751	0.00109383	1.28359e-05	-0.00993041	0.0229139	-0.0231713	-0.0264662	-0.0186193	0.0281589	-0.013223	0.035123	0.000525255	0.0280139	-0.00296325	0.0344705	-0.00133908	-0.0083205	0.0207265	0.000330233	0.0401205	0.0361977	0.0591299	0.0202749	0.01981	-0.0308259	-0.000979192	-0.00690235	0.0696616	-0.0262756	-0.0621313	0.0322141	0.00156222	0.0285255	0.0759059	0.0383111
G	GGC	0.0100929	-0.00293103	0.00921817	-0.00194056	-0.00301336	-0.00183385	0.00553524	0.000142003	-0.00342751	0.0156377	0.0063644	0.00497892	0.00357391	-0.0113243	0.0128717	0.00939602	0.00669286	-0.000941235	0.00546646	-0.00286321	0.00180435	-0.027828	-0.0321702	-0.00943721	0.0194954	0.027254	-0.0218984	-0.012404	0.00512819	0.0244361	-0.018944	0.0287439	0.0103379	-0.00412239	-0.0023827	0.0048859	0.0159091	-0.0165121	0.038816	0.00781881	0.033205	0.0161842	0.0108091	-0.0210406	0.0063783	-0.0242074	0.0221584	0.0150694
G	GGT	0.00385924	0.00519217	0.0312352	0.00845483	0.00323443	-0.00475372	-0.0231442	-0.00370514	0.0223028	-0.0118987	-0.0450738	0.0233287	0.00380689	0.00312444	0.0243842	0.0131474	-0.0208072	0.0193558	-0.0153207	0.00204531	0.00798115	-0.020936	0.00374563	-0.00151003	-0.00655053	0.011048	0.0331808	0.0182715	0.000671454	0.0134542	0.0165704	0.000319683	0.00466541	0.0246273	-0.0244417	-0.00396052	-0.00732248	-0.00216204	0.00133009	0.0153106	-0.00689073	0.0622076	-0.0466608	0.00537792	0.0145406	0.0154088	0.0241965	0.0218337
G	GGA	0.00176015	0.00675591	-0.00524375	0.01876	0.000305533	-0.0278949	-0.00839204	-0.0123159	-0.00250442	0.0130129	-0.0418013	0.0255591	0.00132302	-0.00857992	0.00707341	0.0146496	0.0113322	-0.00332022	0.00569813	-0.0212355	0.0337151	0.0322406	-0.064975	-0.00262496	0.0135855	0.00224889	-0.112026	0.0546301	0.011373	-0.00554276	0.0230563	0.0290661	-0.000322517	-0.0217729	0.00928042	0.0164645	-0.0315284	-0.00616726	0.0427925	-0.0161264	0.00479892	-0.0247047	0.0166332	-0.0130468	-0.023504	0.0264959	-0.0169792	0.0200738
G	GGG	0.00375373	0.0160055	0.0128299	0.000906875	-0.00180671	-0.00676921	-0.000558141	-0.00793705	0.0275665	0.0011933	-0.00382253	-0.000601724	0.00241883	-0.0152425	0.011967	0.0138338	0.0124067	0.000903542	0.00520094	0.0077272	-0.00123786	0.0171797	0.0284814	0.0259201	0.00142925	-0.0088598	0.0215583	-0.0461418	-0.0164178	0.00250323	0.0439954	0.0131385	0.0244694	0.0202781	0.0668577	0.0111269	0.00275412	0.0101645	-0.0045706	-0.00973533	0.0165758	0.0174285	0.00822434	0.0143194	-0.0063122	-0.020801	0.0405448	0.0269693
[truncated: 214 more columns]

## Sheet: P-value for 2D codon heatmap
P-values for shuffled datasets exceeding experimental data of 2-dimensional representation of stalling propensities with the corresponding codons located in the P- and A-sites
P\A		Codons located in the A-site
		CCC	CCT	CCA	CCG	CTC	CTT	CTA	CTG	CAC	CAT	CAA	CAG	CGC	CGT	CGA	CGG	TCC	TCT	TCA	TCG	TTC	TTT	TTA	TTG	TAC	TAT	TAA	TAG	TGC	TGT	TGA	TGG	ACC	ACT	ACA	ACG	ATC	ATT	ATA	ATG	AAC	AAT	AAA	AAG	AGC	AGT	AGA	AGG
P	CCC	1	1	0.981884	1	0.633152	0.918478	0.400362	0.752717	0.782609	0.769928	0.516304	0.144928	0.621377	0.625906	0.879529	0.294384	0.957428	0.0932971	0.00362319	0.328804	0.805254	0.136775	0.876812	0.90308	0.405797	0.63587	1	0.992754	0.995471	0.226449	0.999094	0.212862	0.958333	0.942029	0.790761	0.486413	0.819746	0.473732	0.0969203	0.218297	0.358696	0.524457	0.761775	0.0235507	0.852355	0.00271739	0.14221	0.418478
P	CCT	0.992754	0.762681	0.759964	0.949275	0.0570652	0.880435	1	0.582428	0.846014	0.319746	0.638587	0.800725	0.177536	0.408514	0.226449	0.0625	0.98279	0.972826	0.741848	0.700181	0.807971	0.745471	0.770833	0.163043	0.584239	0.3125	0.970109	1	0.995471	0.418478	0.108696	0.736413	0.98279	0.674819	0.360507	0	0.544384	0.262681	0.348732	0.499094	0.949275	0.514493	0.82971	0.0905797	0.990942	0.817935	0.0117754	0.744565
P	CCA	0.995471	0.61413	0.995471	0.999094	0.23913	0.981884	0.346014	0.241848	0.57971	0.668478	0.254529	0.537138	0.730072	0.753623	0.23279	0.529891	0.970109	0.354167	0.532609	0.325181	0.0697464	0.484601	0.826993	0.299819	0.790761	0.0788043	0.997283	0.692935	0.929348	0.905797	0.772645	0.212862	0.996377	0.26087	0.327899	0.578804	0.707428	0.980072	0.300725	0.653986	0.583333	0.978261	0.980072	0.71558	0.956522	0.637681	0.397645	0.996377
P	CCG	1	0.604167	0.918478	1	0.788949	0.707428	0.692029	0.886775	0.947464	0.55163	0.048913	0.714674	0.901268	0.581522	0.867754	0.883152	0.956522	0.82971	0.181159	0.116848	0.324275	0.764493	0.788949	0.677536	0.550725	0.826993	0.932971	0.955616	0.96558	0.813406	0.109601	0.40942	0.775362	0.625906	0.0181159	0.379529	0.195652	0.388587	0.794384	0.447464	0.939312	0.0317029	0.751812	0.831522	0.311594	0.17663	0.508152	0.462862
L	CTC	0.451087	0.15308	0.110507	0.405797	0.433877	0.416667	0.0914855	0.201087	0.0996377	0.261775	0.0253623	0.311594	0.430254	0.423913	0.0371377	0.100543	0.726449	0.400362	0.544384	0.931159	0.536232	0.564312	0.636775	0.713768	0.73279	0.790761	0.0117754	0.773551	0.754529	0.133152	0.447464	0	0.209239	0.289855	0.89221	0	0.583333	0.396739	0.230978	0.80163	0.646739	0.0525362	0.415761	0.0480072	0.729167	0.98279	0.528986	0.353261
L	CTT	0.105978	0.759058	0.321558	0.307971	0.212862	0.513587	0.92663	0.914855	0.342391	0.651268	0.140399	0.298007	0.761775	0.0480072	0.461957	0.975543	0.72192	0.138587	0.929348	0.154891	0.123188	0.621377	0.583333	0.304348	0.0643116	0.0887681	0.973732	0.780797	0.258152	0.548913	0.0606884	0.278986	0.817935	0.942029	0.0661232	0.485507	0.359601	0.315217	0.10779	0.951993	0.752717	0.417572	0.0588768	0.475543	0.901268	0.316123	0.898551	0.338768
L	CTA	0.36413	0.191123	0.690217	0.480072	0.353261	0.345109	0.434783	0.462862	0.986413	0.678442	0.480978	0.0570652	0.806159	0.730978	0.327899	0.822464	0.649457	0.520833	0.387681	0.827899	0.630435	0.831522	0.613225	0.860507	0.410326	0.125	0.644022	0.0108696	0.455616	0.225543	0.711957	0.308877	0.277174	0.436594	0.569746	0.133152	0.0425725	0.0344203	0.270833	0.464674	0.394928	0.157609	0.813406	0.336957	0.644928	0.719203	0.471014	0.244565
L	CTG	0.584239	0.0923913	0.279891	0.0181159	0.23279	0.0597826	0.00543478	0.0389493	0.186594	0.123188	0.067029	0.0280797	0.332428	0.387681	0.153986	0.307971	0.557971	0.490942	0.443841	0.13587	0.481884	0.634964	0.138587	0.513587	0.22192	0.0181159	0.555254	0.105978	0.721014	0.893116	0.483696	0.72192	0.356884	0.474638	0.151268	0.878623	0.543478	0.048913	0.34058	0.535326	0.246377	0.0262681	0.0480072	0.838768	0.390399	0.872283	0.999094	0.0896739
H	CAC	0.0443841	0.076087	0.0480072	0.928442	0.243659	0.712862	0.00905797	0.76087	0.315217	0.208333	0.0117754	0.302536	0.248188	0.0643116	0	0.0905797	0.424819	0.940217	0.418478	0.0561594	0.317935	0.494565	0.689312	0.782609	0.919384	0.197464	0.184783	0.897645	0.274457	0.192029	0.0335145	0.00543478	0.182065	0.400362	0.300725	0.567935	0.0742754	0.949275	0.15942	0.332428	0.013587	0.183877	0.896739	0.817935	0.730978	0.274457	0.247283	0.0625
H	CAT	0.207428	0.158514	0.0634058	0.921196	0.476449	0.804348	0.000905797	0.221014	0.0380435	0.048913	0.272645	0.153986	0.362319	0.0914855	0.583333	0.167572	0.365036	0.900362	0.933877	0.0706522	0.199275	0.237319	0.799819	0.620471	0.82337	0.956522	0.661232	0.86413	0.727355	0.424819	0.733696	0.0181159	0.947464	0.737319	0.053442	0.663949	0.761775	0.119565	0.123188	0.758152	0.1875	0.63587	0.380435	0.544384	0.535326	0.912138	0.0253623	0.00271739
Q	CAA	0.217391	0.243659	0.147645	0.731884	0.831522	0.741848	0.34058	0.781703	0.394022	0.308877	0.546196	0.48279	0.525362	0.358696	0.168478	0.186594	0.451087	0.692029	0.501812	0.884058	0.432065	0.563406	0.441123	0.863225	0.487319	0.00362319	0.758152	0.0525362	0.115942	0.384058	0.212862	0.0235507	0.352355	0.538043	0.00543478	0.291667	0.605978	0.44837	0.455616	0.519022	0.297101	0.537138	0.401268	0.653986	0.95471	0.783514	0.0661232	0.0806159
Q	CAG	0.468297	0.97192	0.0317029	0.258152	0.252717	0.34058	0.298007	0.133152	0.230072	0.966486	0.125906	0.101449	0.201087	0.770833	0.349638	0.780797	0.764493	0.924819	0.483696	0.648551	0.959239	0.51721	0.861413	0.343297	0.54529	0.259964	0.121377	0.557065	0.706522	0.918478	0.0724638	0	0.106884	0.566123	0.671196	0.119565	0.654891	0.278986	0.0733696	0.531703	0.0344203	0.0634058	0.259964	0.0733696	0.990942	0.211051	0.17663	0.48279
R	CGC	0.0163043	0.216486	0.424819	0.463768	0.223732	0.276268	0.0353261	0.761775	0.798913	0.0126812	0	0.201087	0.404891	0.86413	0.00634058	0.0570652	0.338768	0.59058	0.912138	0.649457	0.290761	0.199275	0.00543478	0.0643116	0.611413	0.880435	0.42029	0.0190217	0.881341	0.163949	0.0914855	0.0144928	0.695652	0.154891	0.000905797	0.442029	0.576993	0.869565	0.103261	0.57971	0.334239	0.456522	0.497283	0.263587	0.600543	0.980978	0.259058	0.00181159
R	CGT	0.375	0.476449	0.0697464	0.434783	0.336957	0.479167	0.197464	0.67663	0.0461957	0.721014	0.0226449	0.307971	0.558877	0.076087	0.605978	0.00905797	0.970109	0.522645	0.608696	0.956522	0.379529	0.164855	0.358696	0.727355	0.240036	0.0407609	0.529891	0.797101	0.20471	0.17029	0.0280797	0.00634058	0.636775	0.193841	0.0706522	0.44837	0.125	0.634964	0.273551	0.831522	0.0842391	0.999094	0.647645	0.000905797	0.734601	0.013587	0.805254	0.86413
R	CGA	0.00905797	0.0172101	0.233696	0.266304	0.699275	0.0190217	0.618659	0.127717	0.0742754	0.435688	0.227355	0.273551	0.648551	0.95471	0.560688	0.048913	0.669384	0.941123	0.319746	0.307065	0.246377	0.730072	0.259964	0.765399	0.00271739	0.400362	0.0362319	0.806159	0.903986	0.936594	0.773551	0.0824275	0.166667	0.106884	0.80163	0.366848	0.0679348	0.495471	0.945652	0.0108696	0.0742754	0.178442	0.716486	0.347826	0.824275	0.883152	0.0860507	0.572464
R	CGG	0	0.182971	0.100543	0.120471	0.293478	0.450181	0.683877	0.0362319	0.234601	0.0987319	0.640399	0.406703	0.438406	0.111413	0.423913	0.173913	0.533514	0.201087	0.251812	0.657609	0.644022	0.525362	0.417572	0.125906	0.990942	0.212862	0.834239	0.980072	0.73279	0.566123	0.984601	0.324275	0.309783	0.194746	0.288949	0.154891	0.51087	0.0634058	0.997283	0.00996377	0.053442	0.998188	0.567935	0.00905797	0.720109	0.259964	0.476449	0.259964
S	TCC	0.417572	0.013587	0.150362	0.785326	0.0190217	0.265399	0.00815217	0.506341	0.238225	0.0480072	0.235507	0.00271739	0.940217	0.0606884	0.890399	0.0887681	0.924819	0.88587	0.484601	0.711957	0.413949	0.0661232	0.344203	0.285326	0.0226449	0.429348	0.10779	0.0552536	0.355072	0.877717	0.000905797	0.182065	0.661232	0.652174	0.0842391	0.0163043	0.749094	0.932971	0.294384	0.0688406	0.0108696	0	0.375906	0.0806159	0.901268	0.6875	0.00634058	0.00996377
S	TCT	0.243659	0.395833	0.753623	0.692935	0.057971	0.0217391	0.00996377	0.468297	0.0597826	0.549819	0.890399	0.0978261	0.0914855	0.498188	0	0.0199275	0.211051	0.421196	0.870471	0.934783	0.561594	0.0362319	0.705616	0.245471	0.0733696	0.134058	0.00543478	0.831522	0.711957	0.151268	0	0.0217391	0.673007	0.0615942	0.317029	0.188406	0.757246	0.132246	0.247283	0.168478	0.173007	0.691123	0.851449	0.673913	0.371377	0.919384	0.0706522	0.0452899
S	TCA	0.0153986	0.338768	0.322464	0.786232	0.256341	0.628623	0.817029	0.5625	0.000905797	0.899457	0.497283	0.101449	0.0271739	0.0878623	0.22192	0.00271739	0.765399	0.958333	0.986413	0.999094	0.860507	0.230978	0.611413	0.847826	0.65308	0.540761	0.543478	0.413949	0.788949	0.347826	0.0679348	0.124094	0.0362319	0.28442	0.160326	0.770833	0.196558	0.533514	0.375906	0.244565	0.100543	0.0172101	0.501812	0.988225	0.939312	0.585145	0.0434783	0.32971
S	TCG	0.122283	0.166667	0.302536	0.866848	0.951087	0.0543478	0.17029	0.490942	0.379529	0.128623	0.178442	0.211051	0.0380435	0.660326	0.536232	0.192029	0.905797	0.947464	0.0244565	0.681159	0.0144928	0.405797	0.221014	0.205616	0.0253623	0.32337	0.355072	0.00181159	0.903986	0.913043	0.299819	0.104167	0.134058	0.942935	0.947464	0.104167	0.222826	0.678442	0.265399	0.718297	0.144022	0.586957	0.530797	0.223732	0.401268	0.898551	0.0163043	0.0371377
F	TTC	0.523551	0.00996377	0.00996377	0.935688	0.326087	0.000905797	0.177536	0.934783	0.0978261	0.361413	0.0461957	0.317029	0.330616	0.0163043	0.520833	0.557065	0.0923913	0.22192	0.967391	0.0905797	0.160326	0.791667	0.317935	0.378623	0.100543	0.00452899	0.817029	0.0742754	0.606884	0.150362	0.878623	0.00724638	0.291667	0.855072	0.115942	0.459239	0.572464	0.533514	0.372283	0.185688	0.764493	0.294384	0.235507	0.988225	0.86413	0.0706522	0.330616	0.701087
F	TTT	0.0498188	0.229167	0.643116	0.861413	0.94837	0.00905797	0.0443841	0.497283	0.55163	0.718297	0.884058	0.322464	0.421196	0.423913	0.47192	0.252717	0.490036	0.213768	0.779891	0.42029	0.212862	0.84058	0.290761	0.140399	0.307065	0.84692	0.827899	0.928442	0.856884	0.375906	0.571558	0.0543478	0.391304	0.235507	0.313406	0.554348	0.207428	0.978261	0.781703	0.435688	0.658514	0.201993	0.762681	0.631341	0.983696	0.543478	0.173007	0.877717
L	TTA	0.0181159	0.890399	0.986413	0.129529	0.110507	0.428442	0.172101	0.780797	0.140399	0.499094	0.106884	0.413043	0.855978	0.461957	0.288949	0.484601	0.168478	0.348732	0.233696	0.653986	0.808877	0.351449	0.443841	0.298007	0.702899	0.969203	0.998188	0.63587	0.862319	0.480978	0.786232	0.34058	0.365036	0.231884	0.168478	0.289855	0.577899	0.0353261	0.339674	0.307065	0.48913	0.48279	0.703804	0.4375	0.990942	0.128623	0.999094	0.167572
L	TTG	0.650362	0.15308	0.497283	0.887681	0.623188	0.866848	0.354167	0.390399	0.471014	0.72192	0.11413	0.483696	0.988225	0.968297	0.201087	0.158514	0.846014	0.118659	0.347826	0.19837	0.255435	0.10779	0.985507	0	0.325181	0.143116	0.593297	0.313406	0.472826	0.980978	0.0878623	0.388587	0.84058	0.692935	0.625906	0.506341	0.393116	0.808877	0.55163	0.702899	0.888587	0.598732	0.988225	0.0507246	0.430254	0.115036	0.190217	0.0923913
Y	TAC	0.924819	0.214674	0.299819	0.206522	0.334239	0.185688	0.947464	0.380435	0.000905797	0.00452899	0.383152	0.212862	0.883152	0.63587	0.571558	0.714674	0.637681	0.797101	0.22192	0.92663	0.831522	0.649457	0.325181	0.0289855	0.0942029	0.0108696	0.166667	0.710145	0.601449	0.0498188	0.0117754	0.108696	0.771739	0.230072	0.38587	0.0643116	0.582428	0.0525362	0.0570652	0.205616	0.679348	0.300725	0.462862	0.942935	0.125906	0.624094	0.356884	0.0153986
Y	TAT	0.522645	0.457428	0.0969203	0.0298913	0.442935	0.201993	0.250906	0.604167	0.0208333	0.52808	0.884964	0.858696	0.318841	0.645833	0.0498188	0.90308	0.413949	0.152174	0.769022	0.379529	0.0634058	0.508152	0.512681	0.143116	0.138587	0.783514	0.147645	0.201087	0.882246	0.271739	0.532609	0	0.723732	0.858696	0.474638	0.680254	0.222826	0.540761	0.186594	0.321558	0.309783	0.461051	0.903986	0.568841	0.116848	0.978261	0.818841	0.566123
*	TAA	N/A	N/A	N/A	N/A	N/A	N/A	N/A	N/A	N/A	N/A	N/A	N/A	N/A	N/A	N/A	N/A	N/A	N/A	N/A	N/A	N/A	N/A	N/A	N/A	N/A	N/A	N/A	N/A	N/A	N/A	N/A	N/A	N/A	N/A	N/A	N/A	N/A	N/A	N/A	N/A	N/A	N/A	N/A	N/A	N/A	N/A	N/A	N/A
*	TAG	N/A	N/A	N/A	N/A	N/A	N/A	N/A	N/A	N/A	N/A	N/A	N/A	N/A	N/A	N/A	N/A	N/A	N/A	N/A	N/A	N/A	N/A	N/A	N/A	N/A	N/A	N/A	N/A	N/A	N/A	N/A	N/A	N/A	N/A	N/A	N/A	N/A	N/A	N/A	N/A	N/A	N/A	N/A	N/A	N/A	N/A	N/A	N/A
C	TGC	0.940217	0.636775	0.0335145	0.992754	0.47192	0.757246	0.0688406	0.461957	0.32971	0.10779	0.428442	0.65942	0.976449	0.621377	0.067029	0.183877	0.650362	0.177536	0.878623	0.407609	0.692029	0.213768	0.484601	0.402174	0.627717	0.211051	0.0181159	0.188406	0.765399	0.013587	0	0.346014	0.740942	0.936594	0.652174	0.00543478	0.247283	0.797101	0.413949	0.0172101	0.440217	0.0679348	0.214674	0.237319	0.968297	0.201087	0.0498188	0.248188
C	TGT	0.998188	0.513587	0.511775	0.183877	0.514493	0.103261	0.371377	0.14221	0.576087	0.487319	0.825181	0.651268	0.691123	0.964674	0.0326087	0.780797	0.211957	0.825181	0.634964	0.804348	0.875	0.627717	0.413949	0.488225	0.177536	0.203804	0.1875	0.530797	0.61413	0.796196	0.263587	0.570652	0.608696	0.391304	0.0434783	0.959239	0.0778986	0.0860507	0.950181	0.211051	0.813406	0.0217391	0.00181159	0.975543	0.993659	0.934783	0.22192	0.311594
*	TGA	N/A	N/A	N/A	N/A	N/A	N/A	N/A	N/A	N/A	N/A	N/A	N/A	N/A	N/A	N/A	N/A	N/A	N/A	N/A	N/A	N/A	N/A	N/A	N/A	N/A	N/A	N/A	N/A	N/A	N/A	N/A	N/A	N/A	N/A	N/A	N/A	N/A	N/A	N/A	N/A	N/A	N/A	N/A	N/A	N/A	N/A	N/A	N/A
W	TGG	0.887681	0.796196	0.509058	0.352355	0.333333	0.222826	0.0652174	0.282609	0.714674	0.00724638	0.808877	0.0307971	0.705616	0.256341	0.836957	0.466486	0.626812	0.352355	0.375	0.791667	0.484601	0.356884	0.404891	0.487319	0.137681	0.174819	0.592391	0.21558	0.791667	0.759058	0.0190217	0.076087	0.249094	0.431159	0.355978	0.0434783	0.971014	0.391304	0.503623	0.503623	0.0643116	0.585145	0.994565	0.229167	0.401268	0.733696	0.73913	0.51721
T	ACC	0.190217	0.0942029	0.369565	0.564312	0.174819	0.696558	0	0.343297	0.0335145	0.526268	0.0217391	0.337862	0.665761	0.250906	0.0271739	0.185688	0.297101	0.957428	0.895833	0.146739	0.809783	0.053442	0.13587	0.0307971	0.0262681	0.616848	0.84058	0.00362319	0.917572	0.586051	0.0452899	0.0208333	0.972826	0.500906	0.372283	0.328804	0.148551	0.621377	0.15942	0.749094	0	0.111413	0.968297	0.558877	0.291667	0.899457	0.51721	0.552536
T	ACT	0.866848	0.0751812	0.245471	0.508152	0.672101	0.533514	0.000905797	0.98913	0.559783	0.389493	0.173007	0.662138	0.168478	0.0271739	0.0887681	0.0543478	0.97192	0.582428	0.671196	0.615942	0.300725	0.317029	0.076087	0.150362	0.0751812	0.515399	0.0271739	0.738225	0.458333	0.60779	0.201087	0.0153986	0.168478	0.35779	0.120471	0.206522	0.26721	0.734601	0.818841	0.997283	0.422101	0.303442	0.445652	0.974638	0.211051	0.769928	0.568841	0.053442
T	ACA	0.615036	0.75	0.759058	0.917572	0.518116	0.152174	0.15942	0.721014	0.127717	0.770833	0.23279	0.651268	0.44837	0.960145	0.0733696	0.192029	0.889493	0.944746	0.975543	0.986413	0.0942029	0.520833	0.721014	0.322464	0.450181	0.358696	0.834239	0.868659	0.690217	0.861413	0.581522	0.349638	0.0914855	0.586957	0.735507	0.451087	0.836051	0.723732	0.475543	0.538043	0.0425725	0.910326	0.549819	0.723732	0.610507	0.23913	0.993659	0.400362
T	ACG	0.15942	0.257246	0.276268	0.942935	0.319746	0.508152	0.206522	0.128623	0.0951087	0.257246	0.210145	0.013587	0.576087	0.873188	0.841486	0.906703	0.970109	0.866848	0.797101	0.632246	0.782609	0.413949	0.355072	0.433877	0.624094	0.907609	0.993659	0.480072	0.938406	0.613225	0.30163	0.127717	0.255435	0.137681	0.0742754	0.0842391	0.761775	0.210145	0.660326	0.0416667	0.053442	0.000905797	0.657609	0.270833	0.839674	0.408514	0.00181159	0.105072
I	ATC	0.496377	0.209239	0.00815217	0.682065	0.535326	0.82337	0.701087	0.912138	0.44837	0.125906	0.00724638	0.103261	0.362319	0.0498188	0.445652	0.0126812	0.417572	0.708333	0.970109	0.548007	0.0869565	0.613225	0.376812	0.869565	0.122283	0.630435	0.316123	0	0.220109	0.00905797	0.0398551	0.0389493	0.737319	0.173913	0.130435	0.231884	0.287138	0.122283	0.173913	0.524457	0.0153986	0.0117754	0.793478	0.455616	0.819746	0	0.542572	0.647645
I	ATT	0.137681	0.860507	0.0389493	0.942935	0.13587	0.928442	0.899457	0.903986	0.792572	0.0452899	0.556159	0.746377	0.00362319	0.747283	0.076087	0.00724638	0.214674	0.936594	0.0425725	0.133152	0.266304	0.0271739	0.257246	0.29529	0.326087	0.322464	0.337862	0.59692	0.449275	0.0516304	0.956522	0.629529	0.964674	0.0443841	0.196558	0.129529	0.28442	0.269022	0.849638	0.495471	0.214674	0.79529	0.26087	0.640399	0.331522	0.92663	0.807065	0.246377
I	ATA	0.331522	0.869565	0.318841	0.00271739	0.233696	0.577899	0.768116	0.219203	0.769928	0.809783	0.0425725	0.257246	0.108696	0.0833333	0.122283	0.0570652	0.380435	0.414855	0.922101	0.949275	0.396739	0.451993	0.235507	0.0806159	0.0226449	0.717391	0.775362	0.0353261	0.586957	0.807065	0.177536	0.100543	0.138587	0.854167	0.996377	0.412138	0.342391	0.384964	0.407609	0.54529	0.288043	0.894928	0.608696	0.799819	0.227355	0.999094	0.888587	0.00271739
M	ATG	0.305254	0.32971	0.132246	0.699275	0.650362	0.595109	0.0615942	0.00271739	0.129529	0.0362319	0.144022	0.121377	0.0525362	0.0117754	0.742754	0.749094	0.980978	0.690217	0.836957	0.499094	0.466486	0.0914855	0.259964	0.0380435	0.984601	0.0280797	0.869565	0.0606884	0.636775	0.609601	0.708333	0.576087	0.151268	0.192029	0.584239	0.123188	0.0697464	0.105072	0.00996377	0.319746	0.0471014	0.792572	0.798007	0.208333	0.737319	0.252717	0.530797	0.991848
N	AAC	0.414855	0.561594	0.211957	0.476449	0.140399	0.80163	0.26721	0.0153986	0.786232	0.0190217	0.733696	0.831522	0.324275	0.911232	0.424819	0.820652	0.435688	0.783514	0.29529	0.596014	0.576993	0.831522	0.0371377	0.387681	0.622283	0.957428	0.00181159	0.809783	0.501812	0.694746	0.988225	0.0742754	0.77808	0.883152	0.726449	0.280797	0.158514	0.622283	0.695652	0.381341	0.177536	0.117754	0.257246	0.728261	0.422101	0.468297	0.646739	0.522645
N	AAT	0.358696	0.34692	0.445652	0.714674	0.379529	0.355072	0.682065	0.361413	0.649457	0.32337	0.662138	0.38587	0.647645	0.333333	0.953804	0.808877	0.722826	0.462862	0.952899	0.997283	0.861413	0.595109	0.637681	0.915761	0.459239	0.854167	0.0326087	0.714674	0.540761	0.259058	0.13587	0.543478	0.213768	0.0806159	0.397645	0.0815217	0.326087	0.368659	0.677536	0.939312	0.360507	0.996377	0.181159	0.689312	0.244565	0.893116	0.177536	0.188406
K	AAA	0.34058	0.999094	0.0516304	0.496377	0.934783	0.576087	0.951087	0	0.747283	0.612319	0.450181	0.862319	0.743659	0.394928	0.110507	0.57971	0.286232	0.901268	0.511775	0.816123	0.380435	0.286232	0.917572	0.92029	0.501812	0.656703	0.904891	1	0.951087	0.727355	0.122283	0.680254	0.943841	0.354167	0.519022	0.275362	0.571558	0.197464	0.952899	0.533514	0.983696	0.621377	0.755435	0.92029	0.914855	0.834239	0.683877	0.988225
K	AAG	0.816123	0.827899	0.478261	0.935688	0.942029	0.973732	0.785326	0.632246	0.434783	0.740036	0.730978	0.77808	0.599638	0.806159	0.879529	0.540761	0.397645	0.402174	0.941123	0.242754	0.884058	0.288949	0.145833	0.518116	0.406703	0.662138	0.863225	0.53442	0.0244565	0.500906	0.414855	0.246377	0.601449	0.519928	0.777174	0.876812	0.983696	0.927536	0.272645	0.39221	0.678442	0.841486	0.559783	0.942935	0.684783	0.935688	0.587862	0.853261
S	AGC	0.0652174	0.186594	0.349638	0.634058	0.0797101	0.335145	0.0652174	0.255435	0.72192	0.856884	0.305254	0.0217391	0.831522	0.772645	0.0289855	0.209239	0.307971	0.0896739	0.240942	0.36413	0.490036	0.375906	0.0507246	0.73913	0.0407609	0.452899	0.108696	0.932065	0.972826	0.272645	0.0208333	0.0144928	0.0978261	0.818841	0.0144928	0.23913	0.944746	0.960145	0.0190217	0.307065	0.0724638	0.660326	0.182065	0.288043	0.200181	0.501812	0.70471	0.00271739
S	AGT	0.817935	0.944746	0.206522	0.125906	0.971014	0.855072	0.365036	0.966486	0.46558	0.298913	0.38587	0.154891	0.647645	0.410326	0.692935	0.384058	0.701993	0.380435	0.787138	0.263587	0.560688	0.673007	0.0217391	0.11413	0.524457	0.504529	0.797101	0.173913	0.757246	0.00996377	0.0271739	0.459239	0.277174	0.361413	0.311594	0.290761	0.23279	0.428442	0.15942	0.0362319	0.788949	0.606884	0.248188	0.372283	0.907609	0.461957	0.585145	0.546196
R	AGA	0.468297	0.846014	0.893116	0.52808	0.511775	0.368659	0.720109	0.416667	0.619565	0.757246	0.666667	0.602355	0.932065	0.0507246	0.235507	0.799819	0.907609	0.951087	0.60779	0.291667	0.548007	0.663043	0.67029	0.136775	0.536232	0.294384	0.133152	0.761775	0.858696	0.419384	0.877717	0.305254	0.669384	0.360507	0.710145	0.21558	0.708333	0.673007	0.696558	0.640399	0.65308	0.692029	0.308877	0.0307971	0.865942	0.869565	0.770833	0.26721
R	AGG	0.499094	0.728261	0.421196	0.942029	0.581522	0.701087	0.641304	0.289855	0.835145	0.677536	0.173007	0.336957	0.125906	0.5625	0.0561594	0.519928	0.646739	0.555254	0.497283	0.186594	0.527174	0.321558	0.23913	0.336957	0.692935	0.0190217	0.656703	0.00905797	0.410326	0.525362	0.175725	0.238225	0.542572	0.173913	0.121377	0.961957	0.406703	0.332428	0.748188	0.0443841	0.358696	0.425725	0.808877	0.00815217	0.987319	0.182971	0.714674	0.126812
A	GCC	0.802536	0.299819	0.13587	0.917572	0.955616	0.994565	0.434783	0.268116	0.369565	0.631341	0.689312	0.0887681	0.987319	0.717391	0.247283	0.0960145	0.916667	0.980978	0.967391	0.995471	0.61413	0.604167	0.144928	0.013587	0.230978	0.476449	0.119565	0.0371377	0.990036	0.977355	0.0108696	0.00634058	0.203804	0.173913	0.919384	0.0588768	0.375906	0.413043	0.943841	0.178442	0.450181	0.0570652	0.769022	0.189312	0.964674	0.405797	0.322464	0.868659
A	GCT	0.832428	0.191123	0.438406	0.451993	0.976449	0.435688	0.930254	0.538949	0.623188	0.0724638	0.324275	0.425725	0.673913	0.178442	0.0932971	0.137681	0.814312	0.903986	0.865942	0.615036	0.64221	0.755435	0.718297	0.605072	0.053442	0.350543	0.547101	0.537138	0.980978	0.986413	0.880435	0	0.570652	0.375	0.0335145	0.131341	0.152174	0.263587	0.445652	0.959239	0.237319	0.374094	0.867754	0.904891	0.369565	0.691123	0.480072	0.661232
A	GCA	0.538949	0.964674	0.307065	0.92029	0.167572	0.45471	0.953804	0.798007	0.265399	0.963768	0.00634058	0.00996377	0.696558	0.48913	0.223732	0.164855	0.592391	0.89221	0.972826	0.992754	0.884964	0.834239	0.779891	0.144022	0.0679348	0.881341	0.969203	0.773551	0.697464	0.0806159	0.512681	0.876812	0.76087	0.388587	0.805254	0.0226449	0.632246	0.697464	0.134058	0.17663	0.60779	0.860507	0.291667	0.802536	0.967391	0.796196	0.0525362	0.192029
A	GCG	0.679348	0.0679348	0.817029	0.817935	0.991848	0.531703	0.0126812	0.652174	0.800725	0.0190217	0.660326	0.540761	0.19837	0.105072	0.0181159	0.000905797	0.547101	0.557065	0.990036	0.964674	0.817935	0.443841	0.689312	0.637681	0.97192	0.000905797	0.947464	0.549819	0.991848	0.726449	0.00271739	0.383152	0.946558	0.539855	0.473732	0.342391	0.20471	0.264493	0.0625	0.952899	0.453804	0.0923913	0.999094	0.567935	0.413949	0.931159	0.352355	0.0869565
V	GTC	0.0362319	0.00815217	0.00181159	0.0797101	0.0860507	0.0896739	0.23279	0.0298913	0.11413	0.365036	0.48279	0.42663	0.371377	0.512681	0.00271739	0.0181159	0.057971	0.365036	0.686594	0.913949	0.0471014	0.889493	0.692029	0.0516304	0.67029	0.220109	0.984601	0.0307971	0.810688	0.0226449	0.000905797	0	0.0452899	0.0280797	0.425725	0.0163043	0.987319	0.570652	0.000905797	0.1875	0.00634058	0.349638	0.451087	0.787138	0.869565	0.452899	0.00543478	0.144022
V	GTT	0.000905797	0.0217391	0.100543	0.0172101	0.258152	0.227355	0.597826	0.872283	0.351449	0.067029	0.485507	0.0797101	0.172101	0.00362319	0.978261	0.00362319	0.447464	0.0144928	0.634964	0.263587	0.231884	0.17029	0.199275	0.141304	0.0905797	0.0471014	0.000905797	0.98913	0.678442	0.288043	0.0733696	0.0987319	0.730072	0.334239	0.603261	0	0.720109	0.588768	0.0289855	0.547101	0	0.0769928	0.923007	0.101449	0.6875	0.995471	0.496377	0.0923913
V	GTA	0.0199275	0.152174	0.476449	0.94837	0.631341	0.240036	0.0688406	0.210145	0.352355	0.332428	0.406703	0.0389493	0.213768	0.479167	0.0516304	0.175725	0.125	0.675725	0.575181	0.913949	0.460145	0.371377	0.251812	0.0298913	0.127717	0.115942	0.447464	0.0280797	0.307065	0.741848	0.00905797	0.0163043	0.674819	0.575181	0.0878623	0.598732	0.112319	0.858696	0.480072	0.733696	0.0362319	0.668478	0.858696	0.110507	0.470109	0.230978	0.422101	0.11413
V	GTG	0.146739	0.127717	0.345109	0.156703	0.0471014	0.368659	0.477355	0.375	0.491848	0.0144928	0.053442	0.259058	0.00271739	0.158514	0.11413	0.604167	0.632246	0.874094	0.502717	0.0416667	0.315217	0.376812	0.00815217	0.00362319	0.591486	0	0.30163	0.311594	0.881341	0.139493	0.150362	0	0.213768	0.0679348	0.0688406	0	0.0706522	0.67663	0.0344203	0.111413	0.192935	0.21558	0.00452899	0.256341	0.994565	0.541667	0.0461957	0.0652174
D	GAC	0.355072	0.304348	0.0117754	0.244565	0.816123	0.69837	0.0996377	0.617754	0.00543478	0.264493	0.156703	0.0978261	0.478261	0.0362319	0.42029	0.1875	0.884964	0.398551	0.994565	0.228261	0.200181	0.681159	0.743659	0	0	0.778986	0.193841	0.0570652	0.759058	0.0561594	0.210145	0.712862	0.541667	0.625906	0.00996377	0	0.0208333	0.480978	0.368659	0.61413	0.548007	0	0.512681	0.946558	0.152174	0.529891	0.0389493	0.0398551
D	GAT	0.615036	0.341486	0.0480072	0.345109	0.383152	0.324275	0.567029	0.231884	0.238225	0.266304	0.737319	0.478261	0.067029	0.0788043	0.567029	0.0244565	0.203804	0.503623	0.660326	0.858696	0.71558	0.155797	0.870471	0.431159	0.00724638	0.434783	0.00996377	0.192029	0.775362	0.397645	0	0.00181159	0.314312	0.707428	0.17029	0.270833	0.225543	0.638587	0.0724638	0.509964	0.5	0.969203	0.919384	0.743659	0.561594	0.207428	0.000905797	0.543478
E	GAA	0.0751812	0.427536	0.605072	0.412138	0.860507	0.383152	0.26087	0.427536	0.200181	0.699275	0.89221	0.580616	0.0788043	0.744565	0.161232	0.172101	0.84692	0.895833	0.400362	0.918478	0.574275	0.946558	0.589674	0.594203	0.125	0.819746	0.582428	0.304348	0.184783	0.245471	0.346014	0.00181159	0.487319	0.0724638	0.143116	0.0181159	0.353261	0.57337	0.376812	0.108696	0.759058	0.886775	0.490036	0.935688	0.686594	0.105072	0.0471014	0.480978
E	GAG	0.0217391	0.396739	0.00996377	0.000905797	0.100543	0.240942	0.00634058	0.645833	0.00996377	0.00362319	0.893116	0.0280797	0.497283	0.64221	0.663043	0.711957	0.896739	0.257246	0.966486	0.993659	0.932971	0.219203	0.794384	0.163043	0.725543	0.140399	0.610507	0.138587	0.667572	0.810688	0.197464	0.69837	0.0643116	0.148551	0.0153986	0.293478	0.275362	0.938406	0.620471	0.598732	0.00181159	0.863225	0.995471	0.0525362	0.708333	0.207428	0.00362319	0.0371377
G	GGC	0.315217	0.917572	0.48913	0.936594	0.934783	0.744565	0.761775	0.779891	0.970109	0.202899	0.644928	0.621377	0.651268	0.991848	0.509964	0.342391	0.63587	0.867754	0.696558	0.776268	0.770833	0.991848	0.966486	0.911232	0.300725	0.172101	0.958333	0.940217	0.711051	0.118659	0.976449	0.048913	0.415761	0.816123	0.891304	0.727355	0.321558	0.946558	0.111413	0.406703	0.130435	0.270833	0.594203	0.971014	0.708333	0.995471	0.17663	0.417572
G	GGT	0.752717	0.377717	0.0144928	0.42029	0.663043	0.707428	0.963768	0.694746	0.145833	0.792572	0.997283	0.162138	0.744565	0.509058	0.146739	0.143116	0.993659	0.171196	0.899457	0.625906	0.475543	0.859601	0.472826	0.432065	0.814312	0.32337	0.125	0.0824275	0.716486	0.359601	0.354167	0.548007	0.769022	0.149457	0.978261	0.775362	0.724638	0.665761	0.549819	0.314312	0.714674	0.000905797	0.994565	0.424819	0.463768	0.196558	0.203804	0.163043
G	GGA	0.85779	0.653986	0.944746	0.143116	0.771739	0.976449	0.782609	0.933877	0.815217	0.401268	0.990942	0.13587	0.82971	0.845109	0.705616	0.423007	0.375906	0.759964	0.641304	0.984601	0.0507246	0.048913	0.998188	0.597826	0.451087	0.47192	1	0.013587	0.387681	0.596014	0.310688	0.0679348	0.875906	0.922101	0.589674	0.331522	0.975543	0.656703	0.128623	0.921196	0.714674	0.910326	0.244565	0.855978	0.980978	0.379529	0.837862	0.216486
G	GGG	0.872283	0.186594	0.475543	0.693841	0.821558	0.835145	0.782609	0.945652	0.0416667	0.563406	0.819746	0.574275	0.749094	0.971014	0.459239	0.109601	0.368659	0.741848	0.576087	0.487319	0.737319	0.253623	0.132246	0.048913	0.723732	0.817029	0.201993	0.997283	0.993659	0.525362	0.00905797	0.125	0.0978261	0.321558	0.00181159	0.509964	0.726449	0.53442	0.602355	0.861413	0.255435	0.253623	0.394928	0.226449	0.929348	0.946558	0.0298913	0.0389493
[truncated: 214 more columns]

## Sheet: Aminoacid heatmap
Stop efficiency at the corresponging amino acid residue in the -2nd position while mRNA codon with specified index number is located in the P-site												Stop efficiency at the corresponging amino acid residue in the E-site while mRNA codon with specified index number is located in the P-site												Stop efficiency at the corresponging amino acid residue in the P-site while mRNA codon with specified index number is located in the P-site												Stop efficiency at the corresponging amino acid residue in the A-site while mRNA codon with specified index number is located in the P-site												Stop efficiency at the corresponging amino acid residue in the 2nd position while mRNA codon with specified index number is located in the P-site
-2	Index number of mRNA codon located in the P-site											E	Index number of mRNA codon located in the P-site											P	Index number of mRNA codon located in the P-site											A	Index number of mRNA codon located in the P-site											2	Index number of mRNA codon located in the P-site
	4	5	6	7	8	9	10	11	12	13			3	4	5	6	7	8	9	10	11	12			2	3	4	5	6	7	8	9	10	11			1	2	3	4	5	6	7	8	9	10			1
W	0.00220325	0.0293729	0.0170431	0.0369432	0.0193434	0.0130452	0.0142285	0.0507455	0.000309871	-0.0138451		W	-0.0122607	-0.0230201	-0.00403586	-0.00174264	0.0223721	0.00672796	-0.00414928	-0.00424001	-0.00793001	-0.0019917		W	-0.0358341	-0.0108934	0.00320115	0.0200032	0.0193003	0.0610224	0.0168533	0.0131667	0.0155572	0.02217		W	-0.0101275	-0.0252584	0.00776669	0.0175165	0.0316494	0.0440075	0.0679025	0.0419458	0.0351997	0.0276017		W	-0.0220628
Y	-0.00846099	0.02172	0.0228147	0.0307005	0.00880773	0.0109636	0.00807444	0.0376883	0.00502247	-0.0080952		Y	-0.0183657	-0.018458	-0.00601421	-0.00257091	0.0253062	-0.00216599	-0.00167416	-0.00884603	-0.000825043	-0.00949735		Y	-0.0326004	-0.0104832	-0.000879209	0.0385663	0.0457272	0.0394567	0.013665	0.0118319	0.0254769	0.0337919		Y	-0.0235611	-0.0347005	-0.00799215	0.00352673	0.0419312	0.040364	0.0483097	0.0172632	0.0209268	0.0166699		Y	-0.0267222
F	-0.00712014	0.0106439	0.0240705	0.0309279	0.0132182	0.00201385	0.0101044	0.0412972	0.00452915	-0.00605814		F	-0.0138879	-0.0185781	-0.00619172	0.000152885	0.0191585	0.0054996	-0.00447223	-0.00802328	-0.0125226	-0.0024575		F	-0.0246122	-0.00531261	0.0103552	0.0296514	0.0259222	0.0590155	0.0236842	0.017887	0.0110386	0.0458332		F	-0.0142275	-0.0216516	-0.0151932	-0.00130697	0.0342806	0.0161831	0.0396138	0.0180985	0.00798222	0.00772893		F	-0.0134706
I	-0.0116038	0.024625	0.0283959	0.0383451	0.0169821	0.00845525	0.0155394	0.0372299	-0.00211361	-0.0110074		I	-0.019967	-0.0192951	-0.0206522	-0.00190363	0.028576	0.000560793	-0.00407646	-0.00332779	-0.00299277	-0.00495787		I	-0.0462772	-0.0115145	0.00520818	0.0313757	0.0399262	0.0570139	0.0198906	0.017436	0.0172267	0.0416501		I	-0.0373578	-0.0408426	-0.0113038	0.00195864	0.0301574	0.0223671	0.0481841	0.0194698	0.0258891	0.0133173		I	-0.0402191
L	0.00187818	0.0275765	0.0207427	0.0387182	0.0143426	0.0100589	0.0108492	0.0415874	0.00203348	-0.0107646		L	-0.015415	-0.0139812	-0.00774153	0.000416998	0.0235415	-0.00158981	-0.00721692	-0.00785471	-0.00775902	-0.00208208		L	-0.0336952	-0.00524605	0.0046824	0.029994	0.0234966	0.0402631	0.014523	0.00868289	0.00778601	0.0292397		L	-0.0304424	-0.032916	-0.0148987	-0.0035136	0.0233202	0.0229662	0.0531585	0.0175603	0.0172877	0.0166187		L	-0.0143293
V	-0.00221775	0.0216429	0.0208846	0.0449604	0.0189145	0.00850608	0.0114687	0.0419287	-0.00238125	-0.0103564		V	-0.0168125	-0.0118182	0.00450313	0.0063533	0.0273784	0.00335112	0.00133369	0.00119759	0.0059366	-0.00510107		V	-0.0342611	0.00022092	0.0129334	0.0427568	0.0325959	0.0583377	0.0243002	0.0206878	0.0140278	0.0464683		V	-0.0219987	-0.0231396	-0.0119192	-0.000485193	0.020386	0.0182817	0.0404544	0.0153731	0.00799151	0.00633235		V	-0.0243826
M	0.00265793	0.0426529	0.032657	0.0539896	0.0238408	0.0232496	0.00488635	0.0705117	0.00610442	-0.0166624		M	-0.020635	-0.0183245	-0.0201499	-0.00287206	0.000882336	0.0103755	-0.00676523	-0.00673895	-0.0104334	-0.00342877		M	-0.0316079	-0.0177784	0.000898593	0.0433949	0.0339524	0.033483	0.0249953	0.0104677	0.0166533	0.0162455		M	-0.02082	-0.0385505	-0.0149695	0.00742761	0.0348347	0.0336173	0.0416391	0.0217032	0.0197742	0.00122358		M	-0.0357415
A	-0.00106783	0.0309434	0.0209029	0.0584683	0.0199869	0.0119669	0.0105264	0.0367109	0.00485972	-0.00769441		A	0.0170128	0.0560148	0.123776	0.0909793	0.111633	0.0742494	0.0645118	0.0600782	0.158185	0.0267695		A	-0.0294585	-0.0131791	-0.0072161	0.0167775	0.0121457	0.0415146	0.0168749	0.00899997	0.00473232	0.0403117		A	-0.0190487	-0.0274727	-0.0162317	-0.00659533	0.0165705	0.00881929	0.0353592	0.0128837	0.00464292	0.00620208		A	-0.0269651
T	-0.00889719	0.0292839	0.0319136	0.0500352	0.0247023	0.0195345	0.0166755	0.0604255	0.00866783	-0.0101217		T	-0.0167142	-0.0105777	0.0284338	0.0197557	0.0373895	0.0155651	0.00488251	0.00308133	0.02639	-0.00162348		T	-0.0460365	-0.00931532	-0.00238299	0.0314425	0.0190846	0.0465644	0.0201634	0.0144126	0.0122735	0.0427818		T	-0.0242379	-0.0361656	-0.0132465	0.00185294	0.035915	0.0265172	0.0510339	0.0213879	0.0152366	0.0220881		T	-0.0313546
S	-0.00244931	0.0334708	0.0279942	0.0579538	0.0210205	0.0136704	0.0103231	0.0437517	0.005368	-0.00641254		S	0.00148905	0.0447069	0.116897	0.0816411	0.102588	0.05941	0.0460671	0.0484892	0.119671	0.0142737		S	-0.0326106	-0.0144519	0.0043208	0.0269431	0.0251551	0.0474636	0.0245907	0.0174117	0.0139925	0.0560545		S	-0.0337524	-0.0403388	-0.0193062	-0.00679472	0.0116986	0.0165209	0.0423997	0.0103712	0.00593832	0.00435791		S	-0.0328206
G	0.00680869	0.0237554	0.0173697	0.0490793	0.0182629	0.0121664	0.0121447	0.0465802	0.00812027	-0.00406294		G	-0.0077968	0.00275446	0.0445214	0.0368866	0.0630079	0.0246204	0.019421	0.0206481	0.0849577	0.013541		G	-0.029379	-0.0156728	-0.00999645	0.0130023	0.0122225	0.0375442	0.0131562	0.00552662	0.0107219	0.0408032		G	-0.0263027	-0.0274381	-0.01615	-0.0138594	-0.00571017	-0.00383866	0.0238125	0.00240113	-0.00427004	-0.00744768		G	-0.0219603
P	-0.0146726	-0.00149676	-0.00249671	0.0241323	0.00369965	-0.00352628	-0.00618825	0.0052523	-0.00399182	-0.00949141		P	-0.0201971	-0.0149582	-0.010041	-0.0048376	0.0207806	-0.000945189	-0.0109543	-0.00900088	-0.00411652	-0.00111183		P	-0.0286558	-0.0145753	-0.0133606	0.0149999	0.0138126	0.0327739	0.00569416	-0.000934358	0.00474166	0.0423102		P	-0.0159685	-0.0233341	-0.00870214	-0.00332762	0.0268272	0.018215	0.0422174	0.0143914	0.00667975	0.00621376		P	-0.018898
Q	-0.0155502	0.0330211	0.0332385	0.0441357	0.0208831	0.0225543	0.00533561	0.0527126	0.00822273	-0.0164723		Q	-0.0203881	-0.0252855	-0.0120133	-0.00407329	0.0191159	-0.000736946	-0.00203377	-0.00103466	-0.00238906	-0.00652104		Q	-0.0389791	-0.014108	0.00226094	0.0353894	0.0192566	0.0503923	0.0243356	0.0101121	0.0101029	0.0282974		Q	-0.0348881	-0.0346445	-0.0138999	-0.00579	0.0385291	0.0362289	0.0632768	0.0240796	0.0202695	0.0173156		Q	-0.0382868
N	-0.0096733	0.0261163	0.018442	0.0469719	0.0127211	0.00855304	0.0156268	0.0324608	-0.00397166	-0.0130098		N	-0.0159324	-0.0183369	-0.0154985	0.000173775	0.0229874	0.00187659	-0.00324949	0.000956691	0.00491703	-0.00211517		N	-0.0388265	-0.0220221	-0.0123853	0.0197292	0.0167127	0.0553088	0.0198472	0.0214799	0.0144736	0.0481088		N	-0.0426055	-0.0567642	-0.014068	0.00990955	0.0396489	0.0430197	0.0680612	0.035651	0.0393441	0.0206481		N	-0.0301026
H	-0.00536769	0.0236762	0.0122252	0.0364486	0.00776158	0.00623216	0.00995356	0.0354829	0.000115122	-0.0098067		H	-0.0128837	-0.0153258	-0.00896387	-0.000435764	0.0253726	0.00200413	-0.00479928	-0.00300361	-0.00884908	-0.00143089		H	-0.0243885	-0.0134672	-0.00219764	0.0285601	0.028429	0.0565908	0.0196555	0.0191098	0.0188048	0.0397855		H	-0.0253904	-0.0364634	-0.0109607	-5.36725e-05	0.0426905	0.0283798	0.0516309	0.023391	0.0119249	0.016233		H	-0.0281446
C	0.000494235	0.0275947	0.0282945	0.0470255	0.0134159	0.00904829	0.00756121	0.0346765	0.00185965	-0.00800023		C	-0.0170725	-0.00219011	0.0199929	0.0243004	0.0481046	0.0143655	0.00911578	0.00516091	0.040011	0.00102235		C	-0.0336992	-0.0140074	0.0022794	0.0145964	0.0176517	0.039385	0.0122797	0.0160262	0.00780635	0.0327238		C	-0.0218794	-0.0341318	-0.0119843	-0.00959815	0.0152421	0.0117089	0.0363118	0.0112083	-0.00245553	0.0104033		C	-0.0281446
K	0.00844839	0.0297264	0.037464	0.0500833	0.035484	0.0243066	0.0326412	0.0718047	0.0111358	-0.00984697		K	-0.0292494	-0.0257275	-0.021383	-0.00383633	0.00825279	-0.00143822	-0.00277976	-0.00973237	0.00189466	-0.00176646		K	-0.0582565	-0.0236824	-0.0220368	0.00439373	0.00954977	0.0419905	0.0167449	0.0119081	0.0188625	0.0183759		K	-0.0482892	-0.0518213	-0.0204935	-0.0207374	0.0303249	0.0238604	0.0340315	0.0481167	0.0251404	0.0124214		K	-0.0313857
R	0.00793083	0.0376241	0.0223795	0.0445172	0.0222337	0.0161668	0.0171156	0.0593506	0.00490474	-0.00858088		R	-0.0218898	-0.0157115	-0.00648371	-0.00741833	0.0216435	0.00242945	-0.00429799	-0.00386765	-0.0100724	-0.00511048		R	-0.0309148	-0.0134629	0.000598121	0.0275371	0.0222142	0.0469861	0.0186552	0.0103779	0.00857815	0.0378036		R	-0.0224374	-0.0303802	-0.00977341	-0.001529	0.0350831	0.0252767	0.0477264	0.0219967	0.0172886	0.0162261		R	-0.0248331
E	-0.00785674	0.0164637	0.016741	0.040676	0.0162975	0.00750394	0.00892241	0.0302677	0.0127485	-0.0114798		E	-0.0181754	-0.0149804	-0.0114228	0.00191125	0.021439	-0.00186849	-0.00413172	-0.00641412	-0.00624256	-0.0024812		E	-0.05411	-0.0265168	0.00119637	0.0366174	0.0227762	0.0664417	0.0271591	0.0239018	0.0145641	0.0369224		E	-0.0490937	-0.0502409	-0.00786564	0.00702226	0.0485135	0.0595786	0.0711751	0.0311947	0.0285456	0.0175993		E	-0.0241982
D	-0.0103495	0.00791671	0.0134733	0.0200576	0.00888442	-0.00165423	0.00123771	0.0312503	0.00395217	-0.00680682		D	-0.0225037	-0.0150888	-0.0153786	-0.00217624	0.0186163	0.00554707	-0.00711618	-0.00111862	0.00238296	-0.00323965		D	-0.0349202	-0.0149186	-0.00427528	0.0380973	0.0335576	0.0600684	0.0274909	0.0192391	0.0199126	0.0529492		D	-0.0395567	-0.049147	-0.0128458	0.0154845	0.0431387	0.0308613	0.0586834	0.0384103	0.0167071	0.0163133		D	-0.0324709
*	0	0	0	0	0	0	0	0	0	0		*	0	0	0	0	0	0	0	0	0	0		*	0	0	0	0	0	0	0	0	0	0		*	-0.0709618	-0.0706245	-0.00555275	0.0163397	0.0304926	0.0312928	0.0701591	0.0313584	0.017929	0.0296813		*	-0.0331743
[truncated: 8 more columns]

## Sheet: P-value for aminoacid heatmap
P-value for shuffled datasets exceeding experimental data of stop efficiency at the corresponging amino acid residue in the -2nd position while mRNA codon with specified index number is located in the P-site												P-value for shuffled datasets exceeding experimental data of stop efficiency at the corresponging amino acid residue in the E-site while mRNA codon with specified index number is located in the P-site												P-value for shuffled datasets exceeding experimental data of stop efficiency at the corresponging amino acid residue in the P-site while mRNA codon with specified index number is located in the P-site												P-value for shuffled datasets exceeding experimental data of stop efficiency at the corresponging amino acid residue in the A-site while mRNA codon with specified index number is located in the P-site												P-value for shuffled datasets exceeding experimental data of stop efficiency at the corresponging amino acid residue in the 2nd position while mRNA codon with specified index number is located in the P-site
-2	Index number of mRNA codon located in the P-site											E	Index number of mRNA codon located in the P-site											P	Index number of mRNA codon located in the P-site											A	Index number of mRNA codon located in the P-site											2	Index number of mRNA codon located in the P-site
	4	5	6	7	8	9	10	11	12	13			3	4	5	6	7	8	9	10	11	12			2	3	4	5	6	7	8	9	10	11			1	2	3	4	5	6	7	8	9	10			1
W	0.153846	0.122172	0.658824	0.754751	0.20905	0.254299	0.202715	0.0334842	0.740271	0.961086		W	0.413575	1	1	1	0.99819	0.982805	0.99819	0.99819	1	0.890498		W	0.666063	0.369231	0.147511	0.739367	0.492308	0.00542986	0.508597	0.265158	0.142081	0.99638		W	0	0.0461538	0	0	0.150226	0	0.00180995	0	0	0		W	0.199095
Y	0.846154	0.380995	0.21629	0.971041	0.936652	0.388235	0.637104	0.564706	0.343891	0.433484		Y	0.887783	1	1	1	0.988235	1	0.999095	1	1	0.999095		Y	0.38552	0.369231	0.382805	0.0199095	0	0.684163	0.730317	0.39276	0.00180995	0.823529		Y	0.279638	0.600905	0.131222	0.142986	0.0117647	0.00271493	0.334842	0.478733	0.00995475	0.0751131		Y	0.514027
F	1	0.972851	0.141176	0.968326	0.762896	0.968326	0.458824	0.373756	0.375566	0.158371		F	1	1	1	1	1	0.991855	0.999095	1	1	0.958371		F	1	0.0371041	0.00633484	0.152036	0.130317	0.0081448	0.0886878	0.0452489	0.41991	0.134842		F	0.000904977	0.0126697	0.752036	0.375566	0.0561086	0.761086	0.758371	0.420814	0.733032	0.704072		F	0.00633484
I	0.99819	0.369231	0.0226244	0.647964	0.393665	0.621719	0.039819	0.561086	0.904072	0.821719		I	0.99276	1	1	1	0.99638	1	1	1	1	0.984615		I	1	0.38733	0.0497738	0.0588235	0	0.0126697	0.184615	0.0515837	0.0651584	0.40905		I	1	0.943891	0.355656	0.145701	0.138462	0.363801	0.293213	0.326697	0	0.238009		I	0.999095
L	0.0244344	0.040724	0.300452	0.868778	0.852489	0.504072	0.303167	0.175566	0.718552	0.949321		L	1	1	1	1	1	1	1	1	1	1		L	0.967421	0	0.00723982	0.0235294	0.116742	0.891403	0.869683	0.81991	0.831674	1		L	0.923982	0.402715	0.823529	0.639819	0.703167	0.18733	0.0190045	0.461538	0	0.00180995		L	0
V	0.446154	0.659729	0.295928	0.199095	0.182805	0.760181	0.246154	0.202715	0.99095	0.863348		V	0.941176	1	1	1	1	1	1	0.99819	1	1		V	0.572851	0	0	0	0	0	0.0081448	0	0.0778281	0.0325792		V	0.0714932	0	0.38371	0.262443	0.856109	0.722172	0.856109	0.772851	0.844344	0.922172		V	0.1819
M	0.226244	0.00995475	0.0217195	0.0696833	0.081448	0.0108597	0.763801	0.00361991	0.310407	0.947511		M	0.919457	0.98552	1	0.997285	1	0.836199	0.999095	0.98733	1	0.822624		M	0.388235	0.817195	0.299548	0.00904977	0.0506787	0.838009	0.0941176	0.484163	0.19819	0.990045		M	0.209955	0.770136	0.660633	0.0914027	0.133937	0.0660633	0.620814	0.281448	0.079638	0.885973		M	0.889593
A	0.228959	0.00271493	0.302262	0	0.0144796	0.140271	0.318552	0.760181	0.123077	0.231674		A	0	0	0	0	0	0	0	0	0	0		A	0.0262443	0.591855	0.976471	0.999095	0.999095	0.855204	0.550226	0.81448	1	0.435294		A	0	0.00180995	0.974661	0.953846	0.999095	1	1	0.990045	1	0.976471		A	0.551131
T	0.98914	0.0570136	0	0.00904977	0	0	0.000904977	0	0.00542986	0.81629		T	0.950226	0.99457	0.0959276	0.40362	0.965611	0.704072	0.997285	0.999095	1	0.971946		T	1	0.104072	0.463348	0.0171946	0.628959	0.239819	0.0524887	0.0452489	0.172851	0.21991		T	0.191855	0.81448	0.559276	0.0723982	0	0.0226244	0.0235294	0.0660633	0.0171946	0		T	0.922172
S	0.465158	0	0.000904977	0	0.00452489	0.0253394	0.363801	0.0443439	0.0995475	0.0352941		S	0	0	0	0	0	0	0	0	0	0		S	0.323077	0.859729	0.000904977	0.162896	0.0253394	0.142081	0	0	0.0289593	0		S	1	0.997285	1	0.959276	1	0.927602	0.832579	1	0.995475	0.999095		S	0.995475
G	0	0.439819	0.78733	0.00542986	0.190045	0.133032	0.115837	0.00271493	0.00271493	0		G	0.000904977	0.00904977	0	0	0	0	0	0	0	0		G	0.0108597	0.949321	1	1	1	0.99095	0.975566	0.99638	0.344796	0.354751		G	0.40724	0.00361991	0.976471	1	1	1	1	1	1	1		G	0.0117647
P	1	1	1	1	1	1	1	1	1	0.797285		P	1	1	1	1	1	1	1	1	1	0.99638		P	0.000904977	0.905882	1	1	0.999095	1	1	1	1	0.109502		P	0	0	0.00361991	0.659729	0.18733	0.858824	0.882353	0.975566	0.999095	0.990045		P	0
Q	0.997285	0.0180995	0	0.369231	0.0977376	0	0.886878	0.00271493	0.081448	1		Q	0.973756	1	1	1	1	1	1	0.999095	1	0.99457		Q	0.880543	0.700452	0.104977	0.0171946	0.586425	0.116742	0.0244344	0.541176	0.486878	0.9819		Q	0.961991	0.615385	0.623529	0.762896	0.00271493	0	0.000904977	0.0316742	0.00633484	0.040724		Q	0.99819
N	0.918552	0.253394	0.499548	0.221719	0.799095	0.61629	0.0714932	0.777376	0.948416	0.906787		N	0.78552	1	1	1	0.99819	1	1	0.938462	1	0.860633		N	0.861538	0.99457	0.990045	0.747511	0.695928	0.0588235	0.269683	0.0208145	0.197285	0.163801		N	0.997285	1	0.642534	0.0081448	0.00904977	0	0	0.000904977	0	0.0271493		N	0.779186
H	0.752036	0.447964	0.963801	0.916742	0.99276	0.915837	0.449774	0.723077	0.852489	0.707692		H	0.508597	1	1	1	1	1	1	1	1	0.955656		H	0.00904977	0.661538	0.463348	0.184615	0.0298643	0.00271493	0.2181	0	0.00542986	0.500452		H	0.365611	0.7819	0.259729	0.257919	0	0.0244344	0.0769231	0.0316742	0.354751	0.0334842		H	0.690498
C	0.274208	0.154751	0.0199095	0.174661	0.765611	0.608145	0.714932	0.777376	0.685973	0.388235		C	0.975566	0.465158	0.741176	0.147511	0.132127	0.714932	0.626244	0.885973	0.451584	0.757466		C	0.496833	0.681448	0.120362	0.98009	0.653394	0.800905	0.896833	0.0425339	0.733937	0.918552		C	0.104977	0.617195	0.400905	0.960181	0.971946	0.949321	0.933937	0.943891	1	0.486878		C	0.61991
K	0.0117647	0.102262	0	0.146606	0	0.000904977	0	0	0.0588235	0.621719		K	1	1	1	1	1	0.999095	0.999095	1	1	0.81086		K	1	0.99819	1	0.997285	0.974661	0.61086	0.533937	0.417195	0.0669683	0.976471		K	1	1	0.98009	1	0.165611	0.322172	0.940271	0	0.00361991	0.361991		K	0.865158
R	0	0	0.0678733	0.174661	0	0	0	0	0.159276	0.478733		R	1	1	1	1	1	1	1	1	1	1		R	0.078733	0.741176	0.0434389	0.0651584	0.148416	0.163801	0.163801	0.499548	0.786425	0.80362		R	0.00542986	0.0488688	0.0334842	0.283258	0	0.0081448	0.150226	0	0.000904977	0		R	0.139367
E	0.842534	0.902262	0.671493	0.609955	0.454299	0.768326	0.538462	0.885973	0.00633484	0.858824		E	0.908597	0.99819	1	0.999095	0.999095	1	1	0.999095	1	0.909502		E	1	1	0.21086	0.0117647	0.297738	0.000904977	0.0117647	0.000904977	0.161086	0.699548		E	1	1	0.0877828	0.0253394	0	0	0	0.000904977	0	0.0606335		E	0.277828
D	0.947511	0.999095	0.881448	1	0.971041	1	0.993665	0.907692	0.38371	0.231674		D	0.990045	1	1	1	1	0.99819	1	0.999095	1	0.976471		D	0.643439	0.764706	0.639819	0.00452489	0.00633484	0	0.000904977	0.00633484	0.00361991	0.00904977		D	0.995475	1	0.466063	0	0.000904977	0.0180995	0.0081448	0	0.0452489	0.0542986		D	0.914932
*	0.270588	1	1	1	1	0.99638	0.977376	1	0.7819	0.00271493		*	0	0.278733	1	1	1	1	0.991855	0.984615	1	0.795475		*	0	0	0.327602	1	0.999095	1	1	0.991855	0.98009	1		*	1	1	0.0352941	0.000904977	0.169231	0.038914	0	0.00180995	0.0606335	0		*	0.941176
[truncated: 8 more columns]

## Sheet: Heatmap for aminoacids in sites
Stop efficiency at the corresponging amino acid residue while located in the ribosome sites							P-values for shuffled datasets exceeding experimental data of stop efficiency at the corresponging triplet while located in the ribosome sites
	Ribosome sites							Ribosome sites
	-2	E	P	A	2			-2	E	P	A	2
W	0.0174071	-0.00322326	0.0109036	0.0212215	0.0105859		W	0.129412	1	0.304072	0	0
Y	0.0134844	-0.00582923	0.0132583	0.00681026	0.000463962		Y	0.839819	1	0.00723982	0	0.425339
F	0.0112398	-0.00461734	0.0166768	0.00417067	0.00452068		F	0.98733	1	0.00180995	0.0588235	0.0524887
I	0.0132116	-0.00641977	0.0104769	0.00182043	-0.000663954		I	0.714027	1	0.00361991	0.382805	0.931222
L	0.0155946	-0.00408459	0.0115815	0.00553841	0.00762801		L	0.219005	1	0.58914	0.0289593	0
V	0.0157641	0.000818082	0.0206549	0.00319505	0.00287461		V	0.39095	1	0	0.378281	0.525792
M	0.0249333	-0.00864105	0.0117415	0.00630344	-0.0006083		M	0	1	0.152036	0.0832579	0.679638
A	0.018386	0.0802169	0.00866812	0.00170872	0.000226381		A	0	0	1	1	1
T	0.0222733	0.0115402	0.0129584	0.0123163	0.00262836		T	0	1	0.0941176	0	0.993665
S	0.0203149	0.0640488	0.0163216	-0.000942771	0.000666223		S	0	0	0	1	1
G	0.0189492	0.0292186	0.00668415	-0.00893969	0.0027253		G	0	0	1	1	0.761991
P	-0.000909435	-0.00558342	0.0050486	0.00618708	0.00896841		P	1	1	1	0.0217195	0
Q	0.0210821	-0.00596186	0.0130942	0.00985875	-0.00266643		Q	0	1	0.18009	0	1
N	0.0149636	-0.00424686	0.00681023	0.00763399	-0.00315842		N	0.664253	1	0.800905	0	0.819005
H	0.0125181	-0.00313387	0.0168436	0.00940351	0.00543061		H	1	1	0	0	0.110407
C	0.0161206	0.0137484	0.00852542	-0.000259548	0.00564953		C	0.174661	0.748416	0.941176	1	0.134842
K	0.0295658	-0.011768	-0.00613404	-0.00654183	-0.00632645		K	0	1	1	1	0.959276
R	0.0225394	-0.0051249	0.0126008	0.00937624	0.00740021		R	0	1	0.0208145	0	0
E	0.0140122	-0.00469483	0.0134485	0.0119446	0.00195026		E	0.914932	1	0.0371041	0	0.371946
D	0.00676892	-0.0047271	0.0184352	0.00962278	0.000840086		D	1	1	0	0	0.857014
*	0	0	0	-0.00105668	8.55698e-05		*	1	1	1	0.851584	0.493213

## Sheet: 2D aminoacid heatmap
2-dimensional representation of stalling propensities with the corresponding aminio acid residue located in the P- and A-sites																							2-dimensional representation of stalling propensities with the corresponding aminio acid residue located in the E- and A-sites																							2-dimensional representation of stalling propensities with the corresponding aminio acid residue located in the E- and P-sites
P\A	Amino acid residues located in the A-site																						E\A	Amino acid residues located in the A-site																						E\P	Amino acid residues located in the P-site
	W	Y	F	I	L	V	M	A	T	S	G	P	Q	N	H	C	K	R	E	D	*			W	Y	F	I	L	V	M	A	T	S	G	P	Q	N	H	C	K	R	E	D	*			W	Y	F
W	0.0244474	0.0141118	0.00797249	-0.00822974	0.0134323	0.0120821	0.00254024	0.0110774	0.0263605	0.00821329	-0.0055156	0.00701671	0.0203334	0.0143896	0.0170017	-0.00524785	-0.00575182	0.00892428	0.014224	0.0292312	0.0306428		W	-0.0146743	-0.0059407	0.00394409	-0.00236447	-0.00725922	0.00345027	0.0138731	-0.00254396	-0.0028414	-0.00135027	-0.00468327	0.00470748	0.0166875	0.00954475	0.00619643	-0.0228012	0.022883	-0.00429375	-0.0206738	-0.00838871	-0.0544151		W	0.0091508	0.00632623	-0.00726479
Y	0.0643054	0.0119943	0.00678039	0.0296277	0.0144332	0.0123045	0.0215661	0.0133659	0.011258	0.00537275	-0.0119507	0.0128835	-0.00127365	0.0105134	0.04663	0.0133649	-0.0111772	0.0059439	0.011156	0.0215297	0.0212118		Y	-0.0080431	-0.00937167	-0.000336968	0.0201926	-0.00635356	-0.0042445	-0.0106475	-0.00976731	-0.0134412	-0.0153089	-0.00374913	-0.000960111	-0.0023471	-0.0230423	-0.00842043	-0.0123877	-0.0155434	-0.00267997	-0.000264829	0.0095516	-0.0179039		Y	-0.000821759	-0.0236158	0.0107909
F	0.0539937	0.0101664	0.00828542	0.00816509	0.0226767	0.00684408	0.0301324	0.0137703	0.0212059	0.015097	-0.00019814	0.0167556	0.0187519	0.0152524	0.016639	0.0151899	-0.0032709	0.0160283	0.0330066	-0.0126867	-0.0177226		F	-0.00713803	-0.00726785	-0.0143169	-0.00656411	0.00591648	-0.00162163	-0.0414357	0.00366616	-0.00869466	-0.00556072	-0.00602963	-0.00498462	-0.0149278	0.00405302	0.00776701	-0.0121426	-0.0333823	-0.00338992	-0.00222258	-0.0112085	-0.00323235		F	-0.00846882	0.0067423	-0.00812837
I	0.0244882	0.0047161	0.0190235	0.0116923	-0.000950994	0.0142696	-5.47353e-05	-0.00118815	0.006688	0.00261413	-0.0118601	0.0173074	0.0156263	0.00960825	0.00255899	0.0252695	-0.0169398	0.0264294	0.00813378	-0.00407847	0.0169546		I	0.0118954	-0.00419095	-0.00332196	-0.00687889	-0.0103523	0.00124167	-0.0043523	-0.00294912	-0.00667721	-0.0192565	-0.00159671	-0.0021223	-0.00729125	-0.0221444	0.000681445	-0.00373937	-0.0281995	-0.00661936	-0.00368431	-0.0197866	-0.00609294		I	-0.0077171	-0.0201144	-0.000945758
L	0.0241283	0.00913974	0.00459257	0.0200456	0.0150855	0.00826467	5.33994e-05	0.00608597	0.016936	0.00694326	-0.00573992	0.0134578	0.0257621	0.0117852	0.0119105	0.00663955	0.0114456	0.00963786	-0.00175531	0.0205606	0.00348842		L	8.17141e-05	-0.00626686	-0.00153345	-0.000143188	-0.0084718	0.00141927	-0.00815648	-0.00398568	-0.00565139	-0.00655937	-0.00265232	-0.00336419	-0.00445556	0.000662636	-0.000115181	0.00306955	-0.0131176	-0.00539181	-9.26015e-05	-0.00673739	-0.00582556		L	-0.00634829	-0.00184827	-0.00937123
V	0.0533541	0.0285063	0.0157726	0.0119657	0.0227347	0.0103445	0.0175931	0.00936679	0.0338954	0.00707156	-0.0102742	0.0231962	0.0215453	0.0353206	0.0190228	0.00676104	0.010124	0.0238774	0.0554491	0.0342643	0.0346445		V	0.0120426	-0.00366117	-0.00460084	0.00888212	-0.000102874	-0.0015636	0.0162385	-0.0012546	0.00251019	0.0014245	-0.0034319	0.00152032	0.000667048	0.0155187	0.00404936	0.00778865	-0.00530696	0.000365043	0.00659662	0.00131944	0.00155213		V	-0.000269025	0.0196443	0.00246664
M	0.00357778	-0.00646588	0.0222603	0.0493648	0.029703	0.0116512	0.0188302	0.00369254	0.0311014	-0.00452565	0.000250596	0.0162797	0.0298063	0.00532907	0.0330867	0.00165878	-0.00479615	0.00835622	-0.00236332	0.0115497	-0.00415693		M	-0.00682709	-0.00146437	0.0152082	5.33549e-05	-0.00879463	0.00517133	-0.0339704	0.00887758	-0.0240718	-0.0105976	-0.0062442	-0.00661482	0.00648546	-0.0266078	-0.0258591	0.00816462	-0.0199896	-0.0194939	-0.0211967	-0.0311839	-0.0267949		M	-0.0179565	-0.0116785	0.0184631
A	0.0237757	0.0159961	0.00166141	0.014695	0.00374002	0.00310791	0.00288817	-4.18121e-05	0.0146979	-0.0041728	-0.00348205	0.00506208	0.0175038	0.0164371	0.0114234	-0.00979023	-0.00113019	0.0135302	0.0119006	0.00901541	0.0181629		A	0.121883	0.123387	0.0640742	0.102558	0.0971675	0.056019	0.0970889	0.0361773	0.119456	0.0422658	-0.00374769	0.072698	0.133871	0.176131	0.0972632	0.0487022	0.141837	0.1027	0.164877	0.125965	0.187161		A	0.0671703	0.105305	0.119119
T	0.0330126	0.00908387	0.0147689	0.00586127	0.0191008	0.0113879	-0.00126493	0.00563599	0.0163494	0.00123369	-0.00646359	0.011338	0.019136	0.0320036	0.0174753	-0.000582849	-0.00941114	0.014794	0.0221189	0.0241748	0.00694314		T	0.0293577	0.0154824	0.00801446	0.0141578	0.00303898	0.00170312	0.0135958	0.0158137	0.0250274	0.0119149	-0.00221327	0.00719547	0.0173458	0.0318314	0.0157259	-0.00151882	0.0144036	0.0117354	0.0111928	0.0161755	0.0134427		T	0.0158638	0.029588	0.0228092
S	0.0240516	0.0198452	0.0131545	0.00906037	0.0153972	0.0129046	0.0214805	0.00103234	0.0217159	0.00214718	-0.00183174	0.0131549	0.0234283	0.0331019	0.0153731	0.00499736	0.0127716	0.0204668	0.0225613	0.010193	0.0376426		S	0.113241	0.0976028	0.0480548	0.0773293	0.0655006	0.0452425	0.0572447	0.0526213	0.0941983	0.0551864	0.000444344	0.0556352	0.105481	0.131123	0.083427	0.0184978	0.106175	0.0797844	0.128191	0.0952803	0.134662		S	0.0639597	0.0961969	0.0802854
G	0.018694	0.00776854	0.0033853	0.00426616	-0.00295788	-0.00575184	-0.000934289	-0.00166933	0.00997238	0.000745046	-0.00558827	0.00610979	0.000760403	0.0167435	0.00906817	0.00380575	-0.00253456	0.00761565	0.0189367	0.011603	0.000468037		G	0.0625176	0.0400089	0.0117083	0.0255382	0.031619	0.0094175	0.0420033	0.0151631	0.0443818	0.0211625	-0.00316776	0.0198869	0.0306314	0.0676601	0.0314857	0.00752695	0.0601155	0.0354632	0.0488454	0.0474327	0.0547048		G	0.0396755	0.0436658	0.0440742
P	0.0116492	0.00746568	0.00725306	0.00917806	0.00353083	0.00209189	0.0138814	0.00685354	0.00869434	0.00653563	-0.0123724	-0.00965306	0.0100103	0.00253619	0.00261237	-0.00606675	0.00443828	0.00683038	0.0108338	0.00870056	-0.0202524		P	-0.00122955	-0.00187449	0.00190349	-0.00528523	-0.00902209	-0.000557432	-0.00359358	-0.00763088	-0.000720827	-0.00805658	-0.01114	-0.00697292	-0.00193983	-0.00475983	-0.00232346	-0.00265971	-0.013505	-0.00565023	-0.00269859	-0.000207528	-0.0385166		P	-0.00509879	0.000416419	-0.000896849
Q	0.0587341	0.01767	0.000119059	0.0137769	0.0101	0.0206947	0.0105316	-0.00074029	0.0258373	-0.000942093	-0.0031891	0.0148926	0.0135131	0.00253619	0.0102991	0.00433881	0.00669719	0.015469	0.0192845	0.0271479	0.0218792		Q	0.00643705	-0.00520041	-0.0223771	-0.0134752	-0.00987765	0.00841334	-0.0186665	-0.00551497	-0.013963	-0.0135807	-0.000764526	-0.00236576	-0.00451966	-8.9401e-05	0.00151013	0.0107122	-0.0170646	-0.00724576	-0.000607449	-0.00820948	-0.0508566		Q	-0.00606363	-0.0048719	0.000496854
N	0.0185387	-0.0127446	-0.015367	0.00809941	0.0173854	0.006806	-0.0070622	0.00397659	0.0099348	-0.00224234	-0.00684984	0.0111287	-0.00680577	-0.00229225	0.00620393	0.00528326	0.000638012	0.00354995	0.019966	-0.00983174	0.0125609		N	-0.00326995	-0.00516432	0.00224508	0.00031757	-0.00205803	-0.00358286	-0.00810617	-0.00982044	-0.0129347	-0.0109041	0.00275435	-0.00347221	-0.0132534	-0.00987774	0.0155563	0.00365702	-0.00723831	-0.00901716	-0.0153663	0.00826403	-0.0126689		N	-0.00712286	-0.00967886	0.00793623
H	0.0426751	-0.00973716	0.0131494	0.0168328	0.0124331	0.0184268	0.00599114	0.0131148	0.0127166	0.0083914	-0.00476623	0.0162743	0.0216814	0.0289093	0.0191018	0.013911	-0.00851757	0.0240178	0.0272889	0.0341192	0.00579808		H	0.000655612	-0.00489734	0.00185544	0.00730959	0.000289928	-0.00261647	0.0103196	-0.00432422	-0.00509534	-0.00424991	-0.00257232	-0.00680268	0.000458272	0.00391617	0.00958175	-0.00661184	-0.0172172	-0.00451493	0.00581415	-0.00921966	0.00745313		H	-0.0154776	-0.0200508	-0.00321085
C	0.0067645	0.00568262	-0.00467711	0.0107338	0.0128852	-0.00304454	0.037126	-0.00152296	0.00903018	-0.000552413	-0.00744021	0.00351512	0.00272733	0.0174876	0.011443	0.00721115	0.0199966	0.00986714	0.0213214	0.0282461	0.0282316		C	0.0227632	0.019891	0.0158863	0.0301135	0.00996723	0.0149578	0.00897975	0.00648032	0.0373116	-0.00212341	-0.00410212	0.00500056	0.0416861	0.0290547	0.0144406	0.0169041	0.00638064	0.0204223	0.0325502	0.0148955	0.0364236		C	0.00556561	-0.00224808	0.0275993
K	0.00984677	-0.012795	0.0024583	-0.0227613	-0.00958835	-0.00266735	0.00332389	-0.00182678	-0.00484719	-0.00425891	-0.0177732	0.00279774	-0.0100061	-0.0283878	-0.0034617	0.0103026	-0.0270965	-0.00230246	0.00978364	0.0071486	-0.0326932		K	8.0061e-05	-0.0146402	-0.0181216	-0.00864598	-0.00874309	-0.0101169	-0.0287916	-0.0111077	-0.0159176	-0.0188822	-0.0123199	-0.00209014	-0.0141516	-0.0158398	-0.0123746	-0.0215082	-0.032236	-0.0138054	-0.0304208	-0.00260884	-0.0187585		K	-0.00914423	-0.0309024	-0.0241311
R	0.0252178	0.00903071	0.0100167	0.00834417	0.013102	0.00674557	0.018015	0.00244324	0.0177269	0.00511692	-0.00563745	0.0149708	0.0180032	0.0110819	0.0134142	0.0039217	0.0229991	0.0137649	0.0206406	0.0175561	0.00537719		R	0.00243926	-0.00737864	-0.000408251	-0.00314219	-0.00914807	0.000214602	0.00451512	-0.00704436	-0.00485612	-0.00390454	-0.00182224	-0.00353794	-0.00674286	-0.0126845	-0.00844143	-0.00365453	-0.0173497	-0.0071647	0.00494987	0.000593152	-0.00106287		R	0.00322588	-0.0105243	-0.00539373
E	0.0241932	0.00475846	-0.00542993	0.00522426	0.0201686	-0.0056806	0.0101166	0.0086	0.0368741	-0.00250377	-0.00581551	0.0269543	0.00135823	0.00284958	0.0298223	0.00483912	-0.00767928	0.0170561	0.0230781	0.00675976	0.010286		E	-0.0147777	-0.0218187	0.0066564	-0.00939967	-0.0031015	-0.000566423	-0.0075049	-0.00651088	-0.000596199	-0.00670499	0.00600021	-0.00566302	-0.0316019	-0.00681367	0.000605018	-0.0012214	-0.0128842	-0.00802217	-0.000567736	0.0144486	-0.020461		E	0.0196003	-0.0264673	0.000371855
D	0.0283345	0.0426724	0.00793958	0.0226369	0.0113342	0.0134203	0.00174078	0.0113313	0.0321522	0.0039407	-0.00622349	0.016643	0.0185566	0.016705	0.0264533	0.0100207	-0.0152039	0.0248316	0.0148603	0.0102756	0.0448523		D	0.0091024	-0.00444837	-0.00601122	-0.0122773	-0.00236819	-0.00993846	0.0257289	-0.00459334	-0.00519042	-0.00732682	-0.00668029	-0.0034663	-0.00685883	-0.0186088	0.00489184	-0.000865362	-0.0186981	-0.0036659	-0.00774636	-0.0137815	-0.0403474		D	-0.00251875	-0.0145402	-0.011107
*	N/A	N/A	N/A	N/A	N/A	N/A	N/A	N/A	N/A	N/A	N/A	N/A	N/A	N/A	N/A	N/A	N/A	N/A	N/A	N/A	N/A		*	N/A	N/A	N/A	N/A	N/A	N/A	N/A	N/A	N/A	N/A	N/A	N/A	N/A	N/A	N/A	N/A	N/A	N/A	N/A	N/A	N/A		*	N/A	N/A	N/A
[truncated: 40 more columns]

[truncated: 1 more sheets: P-value 2D aminoacid heatmap]
