# Supplementary material for: Context specificity of translation inhibitors revealed by toe-seq
Source: Research Square preprint supplement (doi:10.21203/rs.3.rs-3832009/v1), 2024-04-03
Supplement: Supplementary file 3 [file 120b8e4406510ceb66b59f0e.xlsx]

## Sheet: Title
Supplementary table 3
Ribosome stalling sites, positional, amino acid and codon preferences of ribosome stalling sites, preferences of stalling at combinations of codons and corresponding amino acids in different sites and its significance for translation inhibition by Bor.

## Sheet: Codon heatmap
Stop efficiency at the corresponging triplet in the -2nd position while mRNA codon with specified index number is located in the P-site													Stop efficiency at the corresponging triplet in the E-site while mRNA codon with specified index number is located in the P-site													Stop efficiency at the corresponging triplet in the P-site while mRNA codon with specified index number is located in the P-site													Stop efficiency at the corresponging triplet in the A-site while mRNA codon with specified index number is located in the P-site
-2		Index number of mRNA codon located in the P-site											E		Index number of mRNA codon located in the P-site											P		Index number of mRNA codon located in the P-site											A		Index number of mRNA codon located in the P-site
		4	5	6	7	8	9	10	11	12	13				3	4	5	6	7	8	9	10	11	12				2	3	4	5	6	7	8	9	10	11				1	2	3	4	5	6	7	8	9
P	CCC	-0.00657114	-0.00203254	-0.00721691	-0.0135143	-0.0124888	-0.00884163	-0.0147518	-0.0263454	-0.00836516	-0.00393611		P	CCC	-0.000767765	-0.00433869	-0.00752156	-0.00886385	-0.0237942	-0.0152435	-0.0200962	-0.0226104	-0.0310615	-0.00662779		P	CCC	0.00229551	-0.00387546	-0.00974891	-0.0157164	-0.0152731	-0.0299582	-0.0262722	-0.0257924	-0.0252646	-0.0373148		P	CCC	0.0140932	-0.000296156	-0.00111979	-0.00425435	-0.00746358	-0.00975446	-0.0286153	-0.0217036	-0.0224957
P	CCT	0.00518301	-0.0047027	-0.00491132	-0.0188129	-0.0114287	-0.0105237	-0.0116316	-0.0227346	-0.00584794	-0.00529757		P	CCT	-0.00310723	-0.00619303	0.000351141	-0.01177	-0.0221829	-0.0173947	-0.0180625	-0.0226358	-0.0290096	-0.00822606		P	CCT	0.0032893	-0.000149884	-0.00440452	-0.00842313	-0.0138579	-0.0296643	-0.0192403	-0.0245066	-0.0222988	-0.0327579		P	CCT	0.000278929	0.00338234	-0.00262428	-0.00583078	-0.00442926	-0.0178068	-0.0228009	-0.0185955	-0.0211244
P	CCA	0.00920487	0.00680805	-0.00400761	-0.0213212	-0.00749055	-0.00979797	-0.0125355	-0.0198092	-0.00532884	-0.000793631		P	CCA	0.00677945	-0.00550287	-0.0105354	-0.00809693	-0.024481	-0.0215241	-0.0229513	-0.0228991	-0.030137	-0.000322643		P	CCA	0.00822701	-0.0121109	-0.00560046	-0.00901344	-0.00968622	-0.0267916	-0.0295822	-0.0304934	-0.0190446	-0.0243717		P	CCA	0.00336282	-0.00106774	-0.000323468	-0.00470685	-0.00391008	-0.00938573	-0.0251295	-0.0161826	-0.0248701
P	CCG	0.00554049	0.000648708	-0.00430059	-0.0151077	-0.00807511	-0.0122626	-0.00949043	-0.0215722	-0.0111069	-0.00584449		P	CCG	0.00127484	-0.00603818	-0.000968616	-0.00595177	-0.0228143	-0.0192754	-0.0199794	-0.0166415	-0.030167	-0.00804099		P	CCG	0.0148697	-0.00144923	-0.00419506	-0.00593933	-0.0145583	-0.0319713	-0.0216767	-0.0220625	-0.0250223	-0.0305619		P	CCG	0.010391	0.00162107	-0.00371668	-0.00884458	-0.0137441	-0.015223	-0.0219809	-0.0169736	-0.0186039
L	CTC	-0.000160382	0.00100474	-0.00330525	-0.0115781	-0.0146115	-0.0131756	-0.0203244	-0.0268034	-0.0092327	-0.00510971		L	CTC	0.00113146	-0.0024121	0.00548427	0.00281543	-0.0148399	-0.0178367	-0.00957478	-0.020046	-0.0273023	-0.0082298		L	CTC	0.0125811	-0.000614884	-0.00202897	0.000484569	-0.0152813	-0.0174399	-0.00938035	-0.00883735	-0.0164048	-0.0363082		L	CTC	-0.00346389	-0.00698354	-0.00451752	-0.00776389	-0.00817594	-0.0114401	-0.0183426	-0.016411	-0.0168502
L	CTT	0.0140775	0.00189663	-0.0105917	-0.027889	-0.017959	-0.0147295	-0.00918329	-0.0279803	-0.0112024	-0.00540214		L	CTT	0.0106628	0.00194187	0.0177008	0.00114742	-0.0103653	-0.0124277	-0.0138654	-0.00753016	-0.0277449	-0.0156758		L	CTT	0.0108667	-0.00994	-0.00332298	-0.00531573	-0.0118312	-0.0234034	-0.0156418	-0.00718785	-0.0159408	-0.0355162		L	CTT	-0.0206498	-0.0140013	-0.0237325	-0.019235	0.000241735	-0.0227904	-0.0267534	-0.018092	-0.0222758
L	CTA	-0.000880174	0.00688292	-0.0159351	-0.0123619	-0.0107821	-0.00733947	-0.0163332	-0.0266669	-0.0123082	-0.0089868		L	CTA	0.0181466	0.0189789	0.0112866	0.00151227	0.00526033	0.000667117	-0.00287096	-0.00448018	-0.0172605	-0.00750443		L	CTA	0.011318	0.00410985	-0.000349238	0.00875149	-0.00118145	-0.0136292	-0.0104335	-0.0150037	-0.00905485	-0.0275748		L	CTA	-0.0581286	-0.0529154	-0.0289176	-0.0349326	-0.0551524	-0.0465775	-0.0535581	-0.0423947	-0.0344495
L	CTG	0.00271517	0.0110015	-0.00591739	-0.00525091	-0.0112525	-0.0154951	-0.0179927	-0.0263096	-0.00724083	-0.00650876		L	CTG	0.00436541	0.00715285	0.00375718	0.010122	-0.0176192	-0.0144928	-0.0144543	-0.0104084	-0.0286037	-0.00566551		L	CTG	0.0119164	-0.000337618	0.00426185	0.00968185	-0.00771219	-0.0141266	-0.0108826	-0.00844513	-0.0153907	-0.0336872		L	CTG	-0.00551746	-0.0121103	-0.00392058	-0.0113644	-0.0103819	-0.00933564	-0.0299026	-0.0130012	-0.0114196
H	CAC	0.00821231	0.00489991	-0.0025593	-0.0090219	-0.0121426	-0.0074863	-0.0140909	-0.0333891	-0.00660836	-0.00443231		H	CAC	0.00416806	0.00465223	0.0104404	-0.00310552	-0.0079957	-0.0111614	-0.00868354	-0.0174582	-0.0312567	-0.0125815		H	CAC	0.0245411	0.00791247	0.0050416	0.000873208	-0.00368445	-0.0175191	-0.0117944	-0.0128172	-0.0120677	-0.0267048		H	CAC	0.00470486	-0.00534756	-0.0088136	-0.0110184	-0.0063674	-0.00735633	-0.0168899	-0.012433	-0.0135386
H	CAT	0.0125811	0.00464043	-0.01656	-0.00144795	-0.0164382	-0.00751103	-0.0146737	-0.0353936	-0.0122452	-0.0055095		H	CAT	0.0134909	0.00426609	0.00966672	-0.00336917	-0.0062925	-0.00729859	-0.00538342	-0.0104567	-0.0357909	-0.0144011		H	CAT	0.000555859	-0.000454529	-0.00543713	0.00137875	-0.00830435	-0.0191397	-0.0155178	-0.0134346	-0.0153011	-0.0290137		H	CAT	-0.0114325	-0.00630416	-0.00997815	-0.00346477	-0.00372027	-0.0206474	-0.0170854	-0.0131204	-0.0132826
Q	CAA	-0.00696413	0.0210951	0.00599819	-0.00680296	-0.0170543	-0.0115845	-0.0171894	-0.0293284	-0.00628507	-0.0221913		Q	CAA	0.0215681	0.00453615	0.0175607	0.0030204	-0.00850567	-0.00623412	-0.00341157	-0.00661503	-0.0143901	-0.00803852		Q	CAA	0.0331652	0.0175772	0.0145215	0.0212033	0.00857139	-0.0126253	-0.00775812	-0.0115264	-0.00739788	-0.0131291		Q	CAA	-0.0135375	-0.0169443	-0.0020935	-0.00462724	-0.0121282	-0.0153734	-0.027214	-0.013982	-0.0112213
Q	CAG	0.0126679	0.0148639	0.00412988	-0.00170728	-0.00925434	-0.0144758	-0.0190711	-0.0277471	0.000346688	-0.00726549		Q	CAG	0.00615264	-0.000370895	0.0108178	0.00642659	-0.017835	-0.0105453	-0.00374804	-0.00367216	-0.0266427	-0.0101696		Q	CAG	0.00188338	-0.000125012	0.00344712	0.0112994	0.000317259	-0.0086647	-0.0100169	-0.0111615	-0.00775714	-0.0283736		Q	CAG	-0.0123817	-0.0138364	-0.0114362	-0.0201332	-0.0147428	-0.0147006	-0.0173205	-0.0136454	-0.0131698
R	CGC	0.00225116	0.00203257	-0.00222725	-0.0179817	-0.016331	-0.0143634	-0.0131974	-0.026673	-0.00957919	-0.00428063		R	CGC	-0.00108453	0.00859403	0.0046442	-0.0117183	-0.00611428	-0.00972956	-0.0118853	-0.0166966	-0.0351457	-0.0142422		R	CGC	0.0131687	0.00380088	0.00963351	0.00830543	0.00137796	-0.011405	-0.0124794	-0.00967206	-0.0133406	-0.0267933		R	CGC	0.00870473	0.000322394	0.0018792	-0.00711871	-0.000810885	-0.0114175	-0.0209355	-0.0129958	-0.013021
R	CGT	-0.00599991	-0.00160975	-0.00342826	-0.00915626	-0.018135	-0.0131702	-0.0121545	-0.0301515	-0.0128875	-0.00132466		R	CGT	0.000683994	0.00770382	0.00443478	-0.0161601	-0.0166222	-0.0116147	-0.0109736	-0.0168883	-0.033116	-0.0171356		R	CGT	0.0111676	0.00561481	-0.000407939	-0.00110156	-0.00414673	-0.009687	-0.0119148	-0.00920477	-0.0131855	-0.0331992		R	CGT	0.00711485	-0.0114948	-0.00608194	-0.00823163	-0.00211516	-0.0102969	-0.0129143	-0.0156721	-0.0144167
R	CGA	0.0041961	-0.00211984	-0.00730978	-0.00604073	-0.0146871	-0.00795943	-0.00550824	-0.0228199	-0.00355017	0.00535241		R	CGA	0.000718289	0.00636392	0.0173596	-0.00135454	-0.0127819	-0.00751805	-0.00553152	-0.014462	-0.0276586	-0.0117158		R	CGA	0.00303817	-0.00262472	0.0116795	0.00218383	-0.0109013	-0.0247481	-0.0171216	-0.00700373	-0.0117945	-0.0568503		R	CGA	-0.0137935	-0.0158396	-0.0133163	-0.018313	-0.00403675	-0.0157943	-0.0314825	-0.0180744	-0.0237883
R	CGG	0.0102188	0.00503104	-0.00344821	-0.0125553	-0.00655912	-0.0132075	-0.00664527	-0.0277563	-0.0063832	-0.00624184		R	CGG	-0.00140005	0.00310491	0.00906549	0.000909849	-0.0056683	-0.00723621	-0.00840563	-0.00522451	-0.0325642	-0.00712817		R	CGG	0.00895984	0.00879542	0.00487949	0.0118042	-0.00224399	-0.0147001	-0.0102641	-0.00615605	-0.0113481	-0.0224154		R	CGG	0.00568996	-0.00551597	0.00054347	-0.0039294	-0.00631322	-0.0131223	-0.0238849	-0.0123025	-0.0137842
S	TCC	-0.00299832	0.00275448	-0.00925201	-0.00425814	-0.00891261	-0.0119002	-0.0186113	-0.0335774	-0.00296819	-0.0037807		S	TCC	0.00521156	0.0058872	-0.00289037	-0.0140101	-0.0108797	-0.0122085	-0.018663	-0.0249029	-0.024859	-0.00174027		S	TCC	0.00872322	0.0022536	0.00460868	0.00220776	-0.00825413	-0.0114291	-0.00322399	-0.0154768	-0.0131789	-0.0267193		S	TCC	0.00127548	0.000861469	-0.00334972	-0.00989774	-0.00879101	-0.00811207	-0.0148898	-0.0134997	-0.013772
S	TCT	0.00458976	0.00260625	-0.00240726	-0.0075298	-0.0093687	-0.0140928	-0.00770077	-0.022283	-0.0122295	-0.00204608		S	TCT	0.00409238	0.000821601	-0.000234356	-0.00470779	-0.0123131	-0.0095878	-0.00848543	-0.016479	-0.0254574	-0.00830621		S	TCT	0.0141086	0.00148247	0.0152242	0.00581382	0.00323934	-0.0125717	-0.0138395	-0.00752466	-0.0141632	-0.0307088		S	TCT	-0.0117207	-0.00784363	-0.0127486	-0.00751112	-0.0099747	-0.0102155	-0.0143972	-0.0172974	-0.00892414
S	TCA	-0.000829733	0.0173794	0.0005021	-0.0227945	-0.0141081	-0.0107515	-0.0127456	-0.0193677	-0.00448416	0.000997134		S	TCA	-0.00374407	0.0107371	0.00320596	0.000132098	-0.00794016	-0.0049972	-0.0189639	-0.00601231	-0.0226764	-0.00949496		S	TCA	0.0062191	-0.00215758	-0.00341051	0.00612155	0.00338124	-0.0114674	-0.00476322	-0.011267	-0.0142493	-0.0250805		S	TCA	-0.00249249	-0.0187959	-0.0103968	-0.00541473	-0.0128865	-0.0128153	-0.0122374	-0.0191362	-0.0185599
S	TCG	0.00904508	0.00648564	0.00265508	-0.0232229	-0.0159196	-0.00668174	-0.0104041	-0.0240674	-0.00284174	-0.00249296		S	TCG	0.00213901	0.00503139	-0.000641056	-0.00638047	-0.0149309	-0.00788434	-0.012491	-0.0153648	-0.024346	-0.00967653		S	TCG	0.0106592	0.00339259	-0.00165934	0.0042632	-0.00217975	-0.0204835	-0.0107869	-0.0099688	-0.010362	-0.0260039		S	TCG	0.0108155	0.00558712	-0.0161268	-0.00352096	-0.00209494	-0.0155371	-0.0156536	-0.0198239	-0.0161266
F	TTC	-0.00551841	-0.00355526	-0.0119729	-0.0292727	-0.00805632	-0.0194012	-0.019322	-0.0387957	-0.00669154	-0.00476651		F	TTC	0.00111512	0.00756932	0.00225253	-0.00391959	-0.021163	-0.0063869	-0.00730258	-0.0167334	-0.0296604	-0.00942826		F	TTC	0.0210251	0.0152562	0.000193821	0.00493884	-0.00183585	-0.00421302	-0.0111697	-0.0126262	-0.0218353	-0.0237997		F	TTC	-0.00153513	-0.00466845	-0.00560684	-0.00266696	0.00195425	-0.0108182	-0.0149753	-0.00793586	-0.0093406
F	TTT	0.00983645	0.0118814	-0.0154161	-0.0146435	-0.0100634	-0.022918	-0.0120527	-0.0333657	-0.00770637	-0.00543791		F	TTT	0.00554231	0.00375563	-0.00222619	0.00722127	-0.00202966	-0.00353305	-0.00964409	-0.0176051	-0.0316753	-0.00612546		F	TTT	0.00601227	0.00293469	-0.00415214	0.00263048	-0.00869403	-0.0115352	-0.0104653	-0.0152305	-0.0236893	-0.0312257		F	TTT	0.00843158	-0.00365198	-0.00761813	0.00626688	-0.00411465	0.0030912	-0.0244686	-0.0146248	-0.0217573
L	TTA	-0.00486144	0.00480019	-0.00922809	-0.00343033	-0.0251016	-0.0113018	-0.0162932	-0.0296921	-0.0081491	-0.0150117		L	TTA	0.00321922	0.0085005	0.00346705	0.0026179	-0.00266377	-0.00702074	-0.0138582	-0.0129388	-0.0220319	0.00255995		L	TTA	0.00877526	0.00327368	-0.00599487	0.0209741	0.0012746	-0.00687725	-0.0199473	-0.0208685	-0.014831	-0.0345249		L	TTA	-0.0123748	-0.00786381	-0.0345313	-0.0265881	-0.0355543	-0.0254852	-0.0204711	-0.0214867	-0.0195767
L	TTG	0.0129111	0.00618894	-0.00791923	-0.00778222	0.000633311	-0.0119074	-0.0108389	-0.0280561	-0.00338818	-0.00697734		L	TTG	0.000488355	0.0194456	0.0102219	-0.00938471	-0.0136295	-0.00336682	-0.00446416	-0.0133848	-0.02092	0.00206429		L	TTG	0.0158346	0.0108079	0.00857881	0.0225191	-0.00415948	-0.0100174	-0.0166163	-0.00860747	-0.0135099	-0.0221127		L	TTG	-0.00903631	-0.0062561	-0.0122233	-0.018915	-0.00986354	-0.0158532	-0.0198403	-0.0164192	-0.0117136
Y	TAC	0.00309937	0.00639101	-0.0131665	-0.0150462	-0.00848686	-0.0103847	-0.0136063	-0.024308	-0.00601343	-0.00691472		Y	TAC	0.00271417	0.00312863	-0.00038339	-0.0067666	-0.0106492	-0.0118223	-0.0132641	-0.0111923	-0.0267784	-0.0127945		Y	TAC	0.00550898	0.000543608	0.00588465	0.0110711	-0.0027908	-0.0122133	-0.00788836	-0.0170537	-0.00206725	-0.0253052		Y	TAC	-0.0121153	-0.00421978	-0.0103156	-0.0166879	-0.00826867	-0.0106378	-0.0265476	-0.0199978	-0.0153619
Y	TAT	0.010238	0.0105053	-0.00777721	-0.00928656	-0.0159019	0.00965733	-0.0136055	-0.0321964	-0.0158746	0.000151038		Y	TAT	0.000151421	0.00862841	0.00861822	-0.00689026	-0.0325766	-0.00741114	-0.0162826	-0.0150367	-0.0365717	-0.00243995		Y	TAT	0.0060038	-0.00322287	0.00410993	-0.000733792	0.00432838	-0.0448072	-0.0167848	-0.0134014	-0.00820335	-0.0608451		Y	TAT	-0.0132776	-0.0159319	-0.0233341	-0.00634882	-0.0209862	-0.00823471	-0.0311426	-0.0321857	-0.0196893
*	TAA	0	0	0	0	0	0	0	0	0	0		*	TAA	0	0	0	0	0	0	0	0	0	0		*	TAA	0	0	0	0	0	0	0	0	0	0		*	TAA	0.0186894	-0.047951	-0.0302622	-0.0251175	-0.0533428	-0.0575001	-0.0264738	-0.0398893	-0.0460908
*	TAG	0	0	0	0	0	0	0	0	0	0		*	TAG	0	0	0	0	0	0	0	0	0	0		*	TAG	0	0	0	0	0	0	0	0	0	0		*	TAG	0.00847216	-0.0216562	-0.02859	-0.0329009	-0.0255154	-0.0363019	-0.075617	-0.0365495	-0.0527356
C	TGC	0.00769107	-0.000513729	0.00234273	-0.0199326	-0.0124395	-0.0112226	-0.0150364	-0.0354892	-0.0120536	-0.00151672		C	TGC	0.00111914	0.00155905	0.00438793	-0.000675974	-0.0164437	-0.00696468	-0.010514	-0.018593	-0.023651	-0.00757907		C	TGC	0.00462082	-0.00322008	0.00794661	0.00146453	0.00149144	-0.0125613	-0.0102395	-0.0123135	-0.0168726	-0.0286107		C	TGC	0.00166877	-0.00659124	-0.00790594	-0.00842155	-0.0102698	-0.00909828	-0.02032	-0.0160152	-0.0193443
C	TGT	0.00880115	0.00711961	-0.000675606	-0.0154288	-0.015202	-0.0124493	-0.01827	-0.0222713	-0.0119235	-0.00741456		C	TGT	-0.00102749	-0.00106938	0.00617876	-0.00949208	0.00346616	-0.0114011	-0.0104446	-0.0141208	-0.0163736	-0.00195111		C	TGT	-0.0103596	0.0125647	0.00671048	-0.0030625	-0.00208404	-0.0157109	-0.0138102	-0.00754538	-0.0240164	-0.0320716		C	TGT	-0.00186803	-0.00198123	-0.012543	-0.012705	-0.00853243	-0.00889949	-0.0347485	-0.0181711	-0.0196227
*	TGA	0	0	0	0	0	0	0	0	0	0		*	TGA	0	0	0	0	0	0	0	0	0	0		*	TGA	0	0	0	0	0	0	0	0	0	0		*	TGA	-0.000438141	-0.0258664	-0.00148563	-0.0376054	-0.0282289	-0.0314818	-0.0474725	-0.0391757	-0.0334152
W	TGG	0.00600208	-0.000618074	-0.00759864	-0.0155274	-0.0108799	-0.00781702	-0.0111734	-0.0273569	-0.00524642	-0.00488547		W	TGG	0.00111401	-0.00178962	-0.000886908	0.000975342	-0.0223221	-0.00858571	-0.0121132	-0.0106816	-0.0294884	-6.40386e-05		W	TGG	-0.00190967	0.00415175	0.0114563	-0.00285117	-0.00313676	-0.0149916	-0.0164041	-0.0031173	-0.0102301	-0.03271		W	TGG	0.00838845	-5.95511e-05	-0.00217805	-0.00340454	-0.00785971	-0.00623573	-0.033494	-0.0128666	-0.0157305
T	ACC	-0.0450277	-0.0297038	-0.0315705	-0.0418718	-0.0258514	-0.0203611	-0.0277299	-0.0428433	-0.00202602	-0.00374611		T	ACC	-0.0283559	-0.037167	-0.0210163	-0.0189525	-0.0334032	-0.0165885	-0.0165636	-0.0248829	-0.0344024	-0.0117846		T	ACC	-0.00767929	-0.000170272	-0.0125159	-0.00136779	-0.00987737	9.6375e-05	-0.0144428	-0.00830258	-0.0181906	-0.0244072		T	ACC	0.361784	0.234925	0.15962	0.148548	0.162444	0.112155	0.0701486	0.0525395	0.0462857
T	ACT	-0.0578273	-0.040211	-0.0317982	-0.0463078	-0.0149807	-0.0177108	-0.0291195	-0.0286267	-0.00679492	-0.00501679		T	ACT	-0.0329655	-0.0373817	-0.0261786	-0.0201636	-0.0364641	-0.0165589	-0.0145745	-0.016136	-0.0279592	-0.010117		T	ACT	-0.0394558	-0.00725726	-0.00596513	-0.0114167	-0.0107552	-0.0106681	-0.0191584	-0.0103891	-0.0169962	-0.0242871		T	ACT	0.4388	0.311868	0.205038	0.214148	0.178396	0.125307	0.0668539	0.0789403	0.0568686
T	ACA	-0.0537609	-0.0431846	-0.0218072	-0.0466615	-0.0238892	-0.0254918	-0.0209862	-0.029686	-0.00406843	-0.000866951		T	ACA	-0.0398021	-0.0452995	-0.0340705	-0.0362748	-0.0427261	-0.0215081	-0.0216712	-0.0127838	-0.0224157	8.54998e-05		T	ACA	-0.0493433	0.00379299	0.00893794	-0.00825893	-0.00471481	-0.00825167	-0.0020556	-0.0117307	-0.00849573	-0.0155182		T	ACA	0.551757	0.43671	0.233296	0.253311	0.244664	0.178538	0.0948609	0.101336	0.0948776
T	ACG	-0.0224717	-0.0146802	-0.02013	-0.0350494	-0.0212658	-0.012693	-0.0186008	-0.0314102	-0.00681135	-0.00409454		T	ACG	-0.0200952	-0.0228325	-0.0196295	-0.0202119	-0.0239155	-0.0145943	-0.0150249	-0.0173179	-0.0313771	-0.00920119		T	ACG	0.00159673	0.00706188	-0.00184438	0.00229236	-0.0132219	-0.0140398	-0.00462817	-0.011262	-0.0148005	-0.0152004		T	ACG	0.32041	0.212511	0.129884	0.145176	0.126019	0.0791845	0.0336644	0.0309824	0.0296219
I	ATC	0.00867005	0.0206941	-0.00215802	-0.0232782	-0.0165718	-0.0199601	-0.0144436	-0.0401027	-0.00794647	-0.0113977		I	ATC	0.0042306	0.0195663	0.0114484	0.0036019	-0.00321956	-0.0112936	-0.00774879	-0.00724953	-0.0335384	-0.0104782		I	ATC	0.0268513	0.00439288	0.000410516	0.0205349	0.00782877	-0.00573289	-0.00989484	-0.0185183	-0.0170108	-0.027878		I	ATC	0.00245499	-0.00506761	-0.00550217	-0.00975067	-0.00505852	-0.014409	-0.0207712	-0.0125066	-0.0116921
I	ATT	0.00271521	0.00452588	-0.0128329	-0.0116296	-0.00950069	-0.00701387	-0.00682728	-0.0350555	-0.0289607	-0.00344712		I	ATT	-0.000315885	-0.0129865	-0.00947902	-0.00129261	-0.0194613	-0.0150612	-0.0178404	0.00946156	-0.0289372	-0.00665386		I	ATT	-0.00293119	-0.00470182	-0.000587963	-0.00142602	0.0120583	-0.010911	-0.00257711	-0.00395553	-0.023163	-0.0294504		I	ATT	-0.0168986	-0.0126354	-0.0157329	-0.0120417	-0.00847611	-0.014175	-0.0187512	-0.0205704	-0.0122478
I	ATA	-0.00559579	-0.00182559	-0.00191629	-0.0191854	-0.0015982	-0.005236	-0.00671532	-0.0340785	0.00252501	-0.00312891		I	ATA	0.00849856	0.000929714	0.013897	-0.00754741	0.00110204	-0.00930736	-0.0147616	-0.0156264	-0.012923	-0.011318		I	ATA	0.0266209	-0.00188497	-0.00312135	-0.00149882	0.00239718	0.00169107	-0.0115191	-0.00858315	-0.00952226	-0.0415408		I	ATA	-0.0284976	-0.0314368	-0.0213392	-0.0103787	-0.0249639	-0.0274219	-0.0274179	-0.0234976	-0.0281778
M	ATG	0.015903	0.0058287	-0.00381413	-0.0244112	-0.00988902	-0.0108878	-0.0221894	-0.0132822	-0.00714936	-0.0123693		M	ATG	0.0043693	0.00956442	0.0128001	-0.00527584	-0.0158831	-0.00132265	-0.0115086	-0.00959016	-0.0283705	-0.0137345		M	ATG	0.0103795	-0.00220493	0.00740419	0.0124696	0.0154738	-0.013151	-0.000924644	-0.0084339	-0.00774488	-0.0358505		M	ATG	-0.00580831	-0.0170836	-0.0119755	-0.0109533	-0.00762238	-0.00501705	-0.0254048	-0.0169132	-0.0145637
N	AAC	0.0256	0.0228153	-0.00374212	-0.0156573	-0.0126998	-0.014978	-0.00814939	-0.0352251	-0.0103914	-0.00454632		N	AAC	0.0126972	0.00695569	0.0153357	0.00133668	-0.0118007	-0.00755215	-0.00989203	-0.0115535	-0.0204557	-1.09893e-05		N	AAC	0.0156337	0.013301	0.00162243	0.00961776	-0.0104116	-0.00633085	-0.00839429	-0.00678572	-0.0209119	-0.0263488		N	AAC	-0.00242716	-0.00978078	-0.0058916	-0.0137598	-0.00791636	-0.0151951	-0.0276977	-0.0102271	-0.0181027
N	AAT	0.00234462	0.0165241	-0.00674218	-0.00975462	-0.00885264	-0.0140694	-0.00540288	-0.0156076	-0.0216766	-0.00264357		N	AAT	0.0181511	0.00274158	0.0141818	-0.0116076	-0.00671752	-0.00214314	-0.00701352	-0.0012642	-0.0222254	-0.014655		N	AAT	0.0110121	-0.00581398	-0.005963	-0.00159254	0.00536896	-0.0114088	-0.00650793	-0.00448456	-0.00367467	-0.017799		N	AAT	-0.0296814	-0.0268222	-0.0199983	-0.0175236	-0.0280504	-0.0132258	-0.0420079	-0.027749	-0.0241991
K	AAA	0.0110124	0.0186488	0.00728733	0.00219723	-0.00889553	-0.0109631	-0.00633045	-0.0208419	0.0106935	-0.00289486		K	AAA	0.0113983	0.0100237	0.0271457	0.0301325	-0.0182692	-0.00235057	0.00455429	0.000586458	-0.0133308	0.0190053		K	AAA	0.0116722	0.002901	-0.00983901	-0.000464358	-0.00165748	-0.0168363	-0.00591914	-0.0258937	-0.0088074	-0.0128468		K	AAA	-0.0206264	-0.0233584	-0.0100483	-0.0185029	-0.0164537	-0.0223337	-0.0337982	-0.0138717	-0.0196575
K	AAG	0.00821591	-0.00537177	-0.000935012	-0.00339178	-0.00724085	-0.0146968	-0.0131464	-0.0250947	-0.0171021	-0.00722967		K	AAG	0.0110406	0.00879974	0.0208524	0.00720186	-0.00451144	-0.00106825	-0.00348282	-0.0177551	-0.0227893	-0.00358728		K	AAG	0.00848072	0.000475193	-0.00267039	-0.00703504	-0.00944471	-0.00567969	-0.0131611	-0.000462981	-0.00715124	-0.0277651		K	AAG	-0.0191363	-0.0312821	-0.0162346	-0.0201736	-0.0183635	-0.0140563	-0.0432665	-0.0160311	-0.0193062
S	AGC	0.00119834	-0.00350464	-0.00223656	-0.0104925	-0.00669983	-0.0153657	-0.016674	-0.0277423	-0.00910474	-0.00386889		S	AGC	0.00571751	0.0106841	-0.00134341	-0.00559988	-0.0177058	-0.0077348	-0.00990989	-0.00682076	-0.0203239	-0.00624602		S	AGC	0.0120058	0.00505328	0.00707127	1.97718e-05	-0.0104454	-0.00885165	-0.0106027	-0.009987	-0.0101831	-0.0282654		S	AGC	-0.0156345	-0.0166003	-0.00815366	-0.0128008	-0.0136056	-0.0162129	-0.0176231	-0.0133379	-0.0174433
S	AGT	-0.000150698	0.00516792	-0.0132529	0.00758228	-0.00437471	-0.00601404	-0.0162775	-0.0162373	-0.00702598	-4.64163e-05		S	AGT	0.00450083	-0.00709155	0.00976076	-2.67656e-06	-0.0215066	-0.014597	-0.0078685	-0.00915036	-0.0161137	-0.00426622		S	AGT	0.00836182	0.0110858	0.00280674	0.000497869	0.00381755	-0.0195421	-0.00345782	-0.00918635	0.00217384	-0.022194		S	AGT	-0.0257996	-0.029193	-0.0216416	-0.0160105	-0.0113813	-0.0205863	-0.0424007	-0.0331778	-0.0224277
R	AGA	0.00187165	0.0305467	-0.00211175	-0.00713262	-0.00092143	-0.0116228	-0.00924075	-0.016893	-0.0144036	-0.000752527		R	AGA	0.00769931	-0.00683289	0.0220542	0.00943539	0.000849732	-0.00656145	-0.00504942	-0.00664606	-0.0215588	-0.00360894		R	AGA	0.0126956	0.00948048	-0.0049621	0.00603106	0.00252031	-0.0177311	-0.0064699	-0.00364479	-0.0115022	-0.0383732		R	AGA	-0.029805	-0.0325779	-0.0252049	-0.0202093	-0.0316393	-0.0338171	-0.0386741	-0.0468537	-0.0403327
R	AGG	0.0107252	0.00541557	0.0035058	-0.0213662	-0.00936026	-0.0147661	-0.0139091	-0.0271772	-0.00757843	-0.00165736		R	AGG	0.0086759	0.0102333	0.0196778	0.00998088	-0.00119773	-0.00737038	-0.00165875	-0.0101389	-0.0197736	-0.00824813		R	AGG	0.00413497	0.00777115	0.00575499	0.00684209	-0.00605893	-0.0156335	-0.00944625	-0.00621288	-0.0150334	-0.0262952		R	AGG	-0.0286078	-0.0161581	-0.012249	-0.0212259	-0.0280565	-0.0302511	-0.0362426	-0.0261631	-0.0214658
A	GCC	-0.00155346	0.00178807	-0.00354693	-0.00927981	-0.0118469	-0.0129128	-0.0148442	-0.0247959	-0.00914825	-0.00514708		A	GCC	-0.00198688	0.00141739	-0.00221038	-0.00571573	-0.0174426	-0.0121248	-0.0115331	-0.0177597	-0.0252362	-0.00704384		A	GCC	0.0112277	0.00436211	0.00509655	0.00899956	-0.00901329	-0.0114994	-0.00948998	-0.0107589	-0.0136538	-0.015629		A	GCC	0.00115455	0.00142499	-0.0108222	-0.0113441	-0.00929292	-0.0129577	-0.0225039	-0.0142928	-0.015263
A	GCT	0.00209243	0.00847274	-0.011831	-0.00132466	-0.012551	-0.0148485	-0.014001	-0.0293524	-0.00117396	-0.00490139		A	GCT	0.00975957	0.00141163	0.00253586	-0.018575	-0.0118653	-0.0146147	-0.013631	-0.0156941	-0.0268795	-0.0105263		A	GCT	-0.000580861	0.00485783	-0.00841492	-0.000911267	-0.0138264	-0.0191815	-0.00749075	-0.0124902	-0.0122681	-0.0224069		A	GCT	0.00717386	-0.000951071	-0.00028207	0.000973385	-0.00286445	-0.0105564	-0.0182189	-0.00996021	-0.0140396
A	GCA	0.00457775	0.00761778	-0.007453	-0.0244752	-0.00968496	-0.00733556	-0.00748057	-0.0261353	-0.00572568	-0.00108376		A	GCA	0.00392175	0.0121273	-0.00304639	-0.00923853	-0.00305628	-0.0183322	-0.00962524	-0.00570493	-0.0206352	-0.0147497		A	GCA	0.012882	0.0136261	0.0022363	0.0167571	0.00369626	-0.023521	-0.00911297	-0.0117597	-0.0107914	-0.0281132		A	GCA	0.00249488	-0.0162761	-0.00603164	-0.0054171	-0.00302843	-0.00655461	-0.00648773	-0.014615	-0.0135654
A	GCG	0.00458696	0.00150803	0.00107819	-0.00740925	-0.00894834	-0.00952258	-0.0121502	-0.0240413	-0.0122192	-0.00162562		A	GCG	0.00436742	0.000758168	0.00351124	-0.00255437	-0.0166697	-0.0129606	-0.0155837	-0.0114697	-0.0279149	-0.00744138		A	GCG	0.0104654	0.000348424	0.00324005	0.00919153	0.00254564	-0.0126671	-0.0127159	-0.0105475	-0.0157496	-0.0206352		A	GCG	0.00164083	0.00179665	-0.00466606	0.000113248	-0.00765081	-0.0234287	-0.0168813	-0.0149464	-0.0140919
V	GTC	0.00379107	-0.00114127	-0.00601614	-0.0214735	-0.0109313	-0.0118411	-0.0167161	-0.021698	-0.011329	-0.00364442		V	GTC	0.000373541	0.00225267	0.00232098	-0.00509474	-0.0216541	-0.0162058	-0.0124613	-0.0130106	-0.0300593	-0.00716462		V	GTC	0.0128456	-0.000105132	0.00455794	0.00593931	-0.00872757	-0.0133258	-0.0150605	-0.0058854	-0.0182592	-0.0259527		V	GTC	-0.000301057	-0.00598743	-0.000377097	0.00401198	-0.00285145	-0.00748564	-0.0184441	-0.0105493	-0.00903846
V	GTT	0.017387	-0.00026516	-0.00498903	-0.00275276	-0.0150576	-0.0162101	-0.00569722	-0.0278562	-0.0143736	-0.00352474		V	GTT	0.00331663	0.000981894	0.00682466	0.00760072	-0.000269753	-0.00887144	-0.00980729	-0.0162528	-0.0370395	-0.020768		V	GTT	0.00784097	-0.00523702	0.00602266	0.00694292	0.00827216	0.00195184	-0.00830841	-0.00543218	-0.0137655	-0.0351409		V	GTT	0.00175329	-0.00529854	0.00199424	-0.00195478	0.00118121	-0.0158542	-0.0231822	-0.0110631	-0.00970021
V	GTA	-0.00649711	0.00302609	-0.00839181	-0.0120359	-0.00530211	-0.0156664	-0.00762175	-0.0274317	-0.00735701	-0.00369227		V	GTA	0.00432513	-0.00678538	-0.0146305	-0.0025807	-0.0184073	-0.0103365	-0.00367118	-0.00125937	-0.030242	-0.000342884		V	GTA	0.0071959	0.00653009	-0.0019606	0.0145641	-0.00379824	-0.0090419	-0.00207554	-0.00408845	-0.00993306	-0.0231911		V	GTA	-0.0110141	-0.000405798	-0.00811974	-0.0159615	-0.0107851	-0.0112884	-0.012622	-0.00790394	-0.0135399
V	GTG	0.00293277	0.00234536	-0.00628043	-0.020415	-0.0114509	-0.0103077	-0.0186565	-0.0206865	-0.00923333	-0.00393617		V	GTG	0.0109416	0.00539517	0.00484539	0.00279338	-0.0176989	-0.0157261	-0.0033743	-0.00307209	-0.0261865	-0.010036		V	GTG	0.00455557	0.00324971	0.00877503	-0.00163411	-0.00241414	-0.0121178	-0.000954503	-0.0063357	-0.0143751	-0.0159083		V	GTG	-0.00870567	-0.00441783	-0.000789414	-0.0110704	-0.00767567	-0.000963984	-0.0213836	-0.0116811	-0.00754164
D	GAC	0.00216236	0.000496626	0.00184553	-0.0263461	-0.0054304	-0.0172611	-0.0137365	-0.0144927	-0.00779672	0.000694349		D	GAC	2.73869e-05	-0.000935665	0.00291575	-0.0087829	-0.0254179	-0.0106221	-0.014315	-0.0164798	-0.0208112	-0.00771472		D	GAC	0.0201563	0.00740799	0.0050715	-0.00291081	0.00223663	-0.00514732	-0.00266477	-0.00937867	-0.00898421	-0.0187353		D	GAC	0.00515601	-0.00556058	-0.00382367	0.00126982	-0.00596265	-0.00453039	-0.0179101	-0.010159	-0.0112476
D	GAT	0.00263296	0.00317564	-0.0057865	-0.0142965	-0.00185681	-0.0180092	-0.00757912	-0.0213371	-0.00373567	0.00159568		D	GAT	0.010182	0.00702197	0.0159488	-0.00698298	-0.00467743	-0.0112844	-0.0112034	-0.010854	-0.0119762	-0.0134177		D	GAT	0.00682184	0.00369367	0.00870655	0.0101358	0.00809612	-0.0192574	-0.0117237	-0.00734374	-0.00311766	-0.0314155		D	GAT	-0.00638183	-0.00852326	-0.0171826	0.000348221	-0.0121029	-0.0142636	-0.0380351	-0.0180485	-0.0216234
E	GAA	0.00716075	0.00774905	-0.00260031	-0.00562728	-0.00985966	-0.00967245	-0.0158223	-0.0259556	-0.00799173	-0.00529127		E	GAA	0.0115194	0.0216753	0.00518058	0.00272241	-0.0162002	-0.0120612	-0.0108024	-0.01491	-0.0328216	-0.00757988		E	GAA	-0.00297781	0.00148775	0.0139835	0.0289182	-0.0132275	-0.0120792	-0.00979569	-0.00553598	-0.00546183	-0.0177704		E	GAA	0.00194065	-0.0256484	0.00120427	0.00224644	-0.00842532	-0.000460953	-0.00373184	-0.0245616	-0.00919273
E	GAG	0.00501337	0.00065112	-0.00324939	-0.0133062	-0.0112825	-0.015652	-0.0157811	-0.0205742	0.00168192	-0.00130418		E	GAG	0.00942542	0.00949905	0.00987713	0.000557185	-0.0181204	-0.00664882	-0.0117443	-0.0178026	-0.0239319	0.00079566		E	GAG	-0.00754152	-0.00443565	-0.00327513	0.00953227	-0.00118669	0.000843335	-0.00510835	-0.00815841	-0.00264772	-0.0173619		E	GAG	-0.0108075	-0.0091027	-0.0111642	-0.0105851	-0.0137695	-0.00135279	-0.0133039	-0.0118389	-0.0191848
G	GGC	0.00519571	0.00556874	0.00282468	-0.0146805	-0.00915362	-0.00674462	-0.0139474	-0.0232816	-0.00722931	-0.00123545		G	GGC	0.00854289	0.0160096	0.00909478	-0.00910533	-0.0169661	-0.0131889	-0.0114179	-0.015088	-0.0160165	1.84336e-05		G	GGC	0.00883548	0.00472482	0.00273389	0.000270854	-0.00816965	-0.0171675	-0.0161127	-0.0119313	-0.00784125	-0.0238214		G	GGC	-0.00160643	-0.00273757	2.35541e-05	-8.0291e-05	-0.00475233	-0.010315	-0.0178294	-0.0100782	-0.0103682
G	GGT	0.00491885	0.0103716	0.00319837	-0.0210293	-0.00794971	-0.00870826	-0.0120654	-0.0230903	-0.00440336	-0.00113404		G	GGT	0.00292806	0.00368485	0.00522188	-0.017742	-0.000608932	-0.0170297	-0.0144664	-0.00877253	-0.0152708	-0.00488586		G	GGT	0.000140498	0.00101662	0.00570472	0.00410206	0.00284866	-0.0127205	-0.00903919	-0.0105791	-0.0113025	-0.0225894		G	GGT	-0.00663838	0.00339935	-0.00843211	0.00161359	-0.00730747	-0.0151732	-0.0140287	-0.0142092	-0.015049
G	GGA	0.009782	-0.000637352	0.00264829	-0.0142024	-0.0144025	-0.00716813	-0.0114749	-0.021347	-0.00922231	-0.00385052		G	GGA	0.00458471	0.00142556	-0.00251264	-0.00465141	-0.0141585	-0.0185063	-0.0114599	-0.00661718	-0.0174316	-0.00352839		G	GGA	-0.00282187	-0.00243639	0.000960508	0.01045	0.0033119	-0.0161925	-0.0164699	-0.0108023	-0.0121631	-0.0177253		G	GGA	-0.0115807	-0.0147798	-0.0142079	-0.0168901	-0.00427155	-0.00528641	-0.00855385	-0.0155117	-0.018674
G	GGG	0.00784939	0.0126099	0.00133586	-0.00496999	-0.012283	-0.0113278	-0.0122301	-0.0174797	-0.00363203	-0.00151288		G	GGG	0.00828514	0.00438077	0.00668947	-0.000690864	-0.010098	-0.0100672	-0.00902165	-0.0120305	-0.017169	-0.0066364		G	GGG	0.000473664	0.00505758	0.0017498	0.00605476	-0.00222839	-0.0128264	-0.00775402	-0.0140089	-0.00942013	-0.0174002		G	GGG	0.00477805	-0.00369519	-0.0013165	-0.00982119	-0.00586137	-0.00777014	-0.0229826	-0.0113368	-0.0110361
[truncated: 12 more columns]

## Sheet: P-value for codon heatmap
P-value for shuffled datasets exceeding experimental data of stop efficiency at the corresponging triplet in the -2nd position while mRNA codon with specified index number is located in the P-site													P-value for shuffled datasets exceeding experimental data of stop efficiency at the corresponging triplet in the E-site while mRNA codon with specified index number is located in the P-site													P-value for shuffled datasets exceeding experimental data of stop efficiency at the corresponging triplet in the P-site while mRNA codon with specified index number is located in the P-site													P-value for shuffled datasets exceeding experimental data of stop efficiency at the corresponging triplet in the A-site while mRNA codon with specified index number is located in the P-site
-2		Index number of mRNA codon located in the P-site											E		Index number of mRNA codon located in the P-site											P		Index number of mRNA codon located in the P-site											A		Index number of mRNA codon located in the P-site
		4	5	6	7	8	9	10	11	12	13				3	4	5	6	7	8	9	10	11	12				2	3	4	5	6	7	8	9	10	11				1	2	3	4	5	6	7	8	9
P	CCC	0.999002	0.949102	0.816367	0.308383	0.674651	0.0419162	0.663673	0.627745	0.670659	0.541916		P	CCC	0.844311	0.961078	1	0.902196	0.996008	0.954092	1	1	0.99002	0.327345		P	CCC	0.901198	0.986028	1	1	1	1	1	1	1	1		P	CCC	0.911178	0.974052	0.897206	0.98004	1	0.948104	1	1	1
P	CCT	0.216567	0.963074	0.513972	0.791417	0.488024	0.365269	0.251497	0.223553	0.295409	0.729541		P	CCT	0.891218	0.95509	0.728543	0.93513	0.936128	0.983034	0.983034	0.998004	0.770459	0.581836		P	CCT	0.756487	0.731537	0.881238	0.989022	0.958084	1	0.996008	1	0.99501	0.966068		P	CCT	1	0.769461	0.87525	0.938124	0.941118	0.999002	0.931138	0.991018	1
P	CCA	0.0608782	0.207585	0.428144	0.92016	0.0728543	0.210579	0.372255	0.0389222	0.265469	0.133733		P	CCA	0.159681	0.94012	0.99501	0.744511	0.98004	1	1	0.998004	0.863273	0.0309381		P	CCA	0.38523	1	0.92515	0.99501	0.857285	0.992016	1	1	0.94012	0.343313		P	CCA	0.99501	0.908184	0.690619	0.91018	0.943114	0.844311	0.976048	0.918164	1
P	CCG	0.145709	0.773453	0.433134	0.516966	0.0389222	0.547904	0.0359281	0.0309381	0.948104	0.854291		P	CCG	0.634731	0.993014	0.879242	0.623752	0.982036	1	0.999002	0.89022	0.934132	0.567864		P	CCG	0.0209581	0.886228	0.946108	0.997006	0.999002	1	1	1	1	0.946108		P	CCG	0.986028	0.917166	0.97505	0.998004	1	0.997006	0.94511	0.993014	0.999002
L	CTC	0.628743	0.679641	0.382236	0.250499	0.854291	0.722555	0.977046	0.676647	0.735529	0.709581		L	CTC	0.581836	0.799401	0.315369	0.0389222	0.505988	0.979042	0.181637	0.979042	0.684631	0.592814		L	CTC	0.141717	0.764471	0.781437	0.758483	0.984032	0.676647	0.171657	0.0858283	0.751497	0.999002		L	CTC	1	0.994012	0.9501	0.979042	0.994012	0.934132	0.727545	0.944112	0.951098
L	CTT	0.0219561	0.56487	0.807385	0.98004	0.922156	0.776447	0.193613	0.689621	0.776447	0.682635		L	CTT	0.0718563	0.47505	0.0149701	0.194611	0.255489	0.56986	0.671657	0.0588822	0.59481	0.971058		L	CTT	0.293413	0.981038	0.758483	0.867265	0.824351	0.894212	0.770459	0.0768463	0.655689	0.98004		L	CTT	1	0.998004	1	0.998004	0.673653	0.998004	0.919162	0.932136	0.989022
L	CTA	0.645709	0.296407	0.891218	0.418164	0.443114	0.153693	0.695609	0.555888	0.801397	0.918164		L	CTA	0.00499002	0.00698603	0.184631	0.195609	0.00399202	0.00199601	0.0229541	0.0449102	0.0479042	0.50998		L	CTA	0.299401	0.37525	0.598802	0.239521	0.316367	0.422156	0.368263	0.713573	0.177645	0.571856		L	CTA	1	1	1	1	1	1	1	1	0.999002
L	CTG	0.399202	0.0508982	0.572854	0.0359281	0.43513	0.862275	0.854291	0.573852	0.486028	0.822355		L	CTG	0.319361	0.148703	0.452096	0	0.662675	0.745509	0.740519	0.156687	0.780439	0.300399		L	CTG	0.219561	0.695609	0.320359	0.0968064	0.698603	0.397206	0.39521	0.0878244	0.639721	0.973054		L	CTG	1	0.999002	0.892216	0.992016	0.993014	0.769461	0.989022	0.588822	0.39521
H	CAC	0.0978044	0.379242	0.330339	0.122754	0.596806	0.0618762	0.500998	0.99002	0.39521	0.586826		H	CAC	0.335329	0.250499	0.0558882	0.326347	0.0998004	0.422156	0.0958084	0.888224	0.931138	0.96008		H	CAC	0.000998004	0.0868263	0.213573	0.694611	0.401198	0.673653	0.447106	0.607784	0.278443	0.512974		H	CAC	0.982036	0.979042	0.998004	0.993014	0.972056	0.693613	0.620758	0.537924	0.670659
H	CAT	0.0499002	0.379242	0.972056	0.0349301	0.851297	0.143713	0.577844	0.992016	0.851297	0.678643		H	CAT	0.0469062	0.297405	0.128743	0.45509	0.144711	0.174651	0.0508982	0.219561	0.979042	0.936128		H	CAT	0.783433	0.695609	0.872255	0.60978	0.681637	0.767465	0.798403	0.646707	0.621756	0.715569		H	CAT	0.999002	0.987026	0.989022	0.813373	0.838323	0.992016	0.595808	0.623752	0.580838
Q	CAA	0.872255	0	0.0828343	0.118762	0.899202	0.479042	0.780439	0.752495	0.402196	1		Q	CAA	0.000998004	0.284431	0.0209581	0.0998004	0.168663	0.0588822	0.00998004	0.0658683	0.0508982	0.543912		Q	CAA	0	0	0.0479042	0.00299401	0.0219561	0.354291	0.162675	0.43014	0.123752	0.00598802		Q	CAA	1	1	0.739521	0.821357	0.993014	0.958084	0.957086	0.646707	0.421158
Q	CAG	0.0299401	0.0179641	0.0259481	0.010978	0.221557	0.819361	0.912176	0.686627	0.0169661	0.878244		Q	CAG	0.239521	0.647705	0.0508982	0.0229541	0.697605	0.321357	0.00199601	0	0.561876	0.771457		Q	CAG	0.761477	0.673653	0.37525	0.0618762	0.174651	0.0808383	0.302395	0.389222	0.0558882	0.648703		Q	CAG	1	1	0.999002	1	1	0.969062	0.623752	0.688623	0.56986
R	CGC	0.444112	0.645709	0.226547	0.794411	0.981038	0.88024	0.377246	0.601796	0.835329	0.582834		R	CGC	0.864271	0.0419162	0.325349	0.982036	0.00998004	0.161677	0.477046	0.853293	1	0.999002		R	CGC	0.0608782	0.312375	0.0129741	0.0708583	0.0329341	0.135729	0.583832	0.101796	0.337325	0.55489		R	CGC	0.989022	0.923154	0.537924	0.993014	0.850299	0.967066	0.922156	0.635729	0.607784
R	CGT	0.948104	0.855289	0.393214	0.189621	0.987026	0.641717	0.283433	0.881238	0.941118	0.148703		R	CGT	0.60978	0.113772	0.384232	0.99002	0.600798	0.484032	0.358283	0.803393	0.95509	0.997006		R	CGT	0.199601	0.211577	0.647705	0.784431	0.424152	0.12475	0.47505	0.141717	0.391218	0.957086		R	CGT	0.984032	0.999002	0.96008	0.961078	0.873253	0.867265	0.309381	0.877246	0.727545
R	CGA	0.332335	0.827345	0.661677	0.0528942	0.847305	0.0878244	0.0169661	0.238523	0.173653	0.000998004		R	CGA	0.601796	0.213573	0.0169661	0.236527	0.343313	0.102794	0.0299401	0.553892	0.626747	0.847305		R	CGA	0.719561	0.823353	0.0638723	0.568862	0.881238	0.96008	0.924152	0.0479042	0.280439	1		R	CGA	1	1	0.999002	1	0.899202	0.983034	0.99501	0.953094	1
R	CGG	0.011976	0.300399	0.369261	0.269461	0.00898204	0.743513	0.00199601	0.796407	0.326347	0.888224		R	CGG	0.863273	0.359281	0.0608782	0.0588822	0.00998004	0.0239521	0.0688623	0	0.981038	0.447106		R	CGG	0.285429	0.0189621	0.190619	0.010978	0.237525	0.446108	0.240519	0.00199601	0.113772	0.0768463		R	CGG	0.999002	0.999002	0.680639	0.933134	0.998004	0.988024	0.979042	0.533932	0.712575
S	TCC	0.853293	0.49002	0.886228	0.0129741	0.157685	0.550898	0.92016	0.987026	0.0329341	0.482036		S	TCC	0.231537	0.190619	0.927146	0.989022	0.196607	0.576846	0.984032	1	0.377246	0.0279441		S	TCC	0.373253	0.452096	0.247505	0.610778	0.780439	0.253493	0.00199601	0.896208	0.366267	0.497006		S	TCC	0.99501	0.827345	0.932136	0.99501	0.992016	0.738523	0.44511	0.702595	0.718563
S	TCT	0.284431	0.565868	0.351297	0.146707	0.299401	0.703593	0.0708583	0.241517	0.863273	0.280439		S	TCT	0.339321	0.531936	0.690619	0.517964	0.339321	0.328343	0.150699	0.714571	0.434132	0.583832		S	TCT	0.123752	0.5499	0.0279441	0.363273	0.0958084	0.358283	0.696607	0.10479	0.477046	0.800399		S	TCT	1	0.983034	0.997006	0.896208	0.974052	0.779441	0.4501	0.88523	0.173653
S	TCA	0.659681	0.011976	0.235529	0.898204	0.795409	0.406188	0.427146	0.0908184	0.269461	0.129741		S	TCA	0.869261	0.0858283	0.472056	0.229541	0.191617	0.0449102	0.96008	0.0409182	0.257485	0.626747		S	TCA	0.541916	0.771457	0.748503	0.316367	0.103792	0.277445	0.0538922	0.449102	0.537924	0.416168		S	TCA	0.999002	1	0.973054	0.863273	0.99501	0.892216	0.327345	0.956088	0.918164
S	TCG	0.0738523	0.248503	0.0399202	0.964072	0.94511	0.0299401	0.174651	0.271457	0.0618762	0.303393		S	TCG	0.502994	0.262475	0.811377	0.613772	0.501996	0.113772	0.566866	0.646707	0.291417	0.733533		S	TCG	0.263473	0.378244	0.774451	0.427146	0.296407	0.826347	0.367265	0.211577	0.11477	0.45509		S	TCG	0.904192	0.581836	0.999002	0.839321	0.902196	0.98004	0.523952	0.992016	0.891218
F	TTC	1	0.844311	0.918164	0.994012	0.197605	0.984032	0.846307	0.988024	0.448104	0.607784		F	TTC	0	0.191617	0.565868	0.442116	0.858283	0.137725	0.126747	0.712575	0.767465	0.678643		F	TTC	0.0359281	0.0169661	0.613772	0.41018	0.309381	0.0608782	0.428144	0.527944	0.967066	0.253493		F	TTC	0.991018	0.916168	0.937126	0.766467	0.587824	0.811377	0.481038	0.166667	0.230539
F	TTT	0	0.0698603	0.902196	0.52495	0.43014	0.99002	0.38523	0.853293	0.499002	0.641717		F	TTT	0	0.331337	0.748503	0.0578842	0.0728543	0.0968064	0.346307	0.717565	0.782435	0.384232		F	TTT	0	0.418164	0.707585	0.568862	0.699601	0.352295	0.393214	0.724551	0.927146	0.798403		F	TTT	0.92515	0.899202	0.89022	0.274451	0.822355	0.187625	0.799401	0.652695	0.953094
L	TTA	1	0.399202	0.647705	0.0968064	0.988024	0.533932	0.649701	0.647705	0.53493	0.968064		L	TTA	0	0.183633	0.474052	0.201597	0.120758	0.234531	0.631737	0.433134	0.304391	0.0628743		L	TTA	0.397206	0.438124	0.741517	0.0219561	0.272455	0.206587	0.858283	0.913174	0.51497	0.847305		L	TTA	1	0.926148	0.998004	1	1	0.988024	0.680639	0.869261	0.869261
L	TTG	0	0.247505	0.705589	0.172655	0.00199601	0.530938	0.318363	0.625749	0.223553	0.784431		L	TTG	0	0.00299401	0.153693	0.760479	0.458084	0.0369261	0.0658683	0.42515	0.155689	0.0279441		L	TTG	0	0.0419162	0.152695	0.00199601	0.4501	0.241517	0.803393	0.188623	0.44012	0.225549		L	TTG	0.999002	0.963074	0.993014	0.998004	0.97006	0.93513	0.704591	0.820359	0.45509
Y	TAC	0.411178	0.277445	0.933134	0.517964	0.254491	0.397206	0.494012	0.384232	0.39521	0.819361		Y	TAC	0.469062	0.366267	0.707585	0.593812	0.301397	0.51996	0.621756	0.287425	0.575848	0.873253		Y	TAC	0.552894	0.593812	0.251497	0.129741	0.409182	0.382236	0.199601	0.869261	0.00698603	0.393214		Y	TAC	0.999002	0.896208	0.983034	0.997006	0.934132	0.783433	0.917166	0.946108	0.774451
Y	TAT	0.111776	0.0598802	0.658683	0.281437	0.799401	0	0.488024	0.844311	0.876248	0.208583		Y	TAT	0.636727	0.0758483	0.262475	0.573852	0.958084	0.268463	0.764471	0.565868	0.93014	0.214571		Y	TAT	0.52994	0.879242	0.371257	0.655689	0.166667	0.997006	0.782435	0.57984	0.175649	1		Y	TAT	0.999002	1	1	0.784431	0.989022	0.601796	0.913174	0.996008	0.882236
*	TAA	0.566866	0.673653	0.325349	0.0439122	0.0219561	0.0289421	0.0429142	0.00199601	0.184631	0.257485		*	TAA	0.616766	0.58483	0.602794	0.276447	0.0638723	0.0349301	0.0309381	0.0469062	0.000998004	0.173653		*	TAA	0.756487	0.654691	0.565868	0.670659	0.288423	0.0918164	0.0389222	0.0459082	0.0548902	0.00299401		*	TAA	0.526946	1	0.999002	0.999002	1	1	0.797405	0.999002	1
*	TAG	0.581836	0.648703	0.266467	0.0349301	0.011976	0.00998004	0.0129741	0	0.0988024	0.180639		*	TAG	0.600798	0.586826	0.657685	0.262475	0.0399202	0.0169661	0.00898204	0.00798403	0	0.0758483		*	TAG	0.751497	0.657685	0.561876	0.618762	0.268463	0.0469062	0.0169661	0.00698603	0.011976	0		*	TAG	0.837325	1	1	1	0.999002	1	1	1	1
C	TGC	0.146707	0.721557	0.0648703	0.831337	0.665669	0.447106	0.62475	0.99501	0.898204	0.170659		C	TGC	0.571856	0.501996	0.387226	0.224551	0.623752	0.0808383	0.316367	0.918164	0.287425	0.493014		C	TGC	0.626747	0.842315	0.0838323	0.644711	0.0958084	0.321357	0.312375	0.535928	0.763473	0.705589		C	TGC	0.992016	0.97006	0.986028	0.97505	0.99501	0.771457	0.779441	0.854291	0.982036
C	TGT	0	0.233533	0.296407	0.568862	0.813373	0.60479	0.856287	0.222555	0.784431	0.808383		C	TGT	0.766467	0.625749	0.344311	0.768463	0.00998004	0.489022	0.382236	0.473054	0.0419162	0.122754		C	TGT	0.999002	0.0309381	0.215569	0.822355	0.364271	0.538922	0.669661	0.12475	0.958084	0.856287		C	TGT	1	0.878244	0.982036	0.98503	0.954092	0.690619	0.993014	0.892216	0.938124
*	TGA	0.588822	0.634731	0.293413	0.0129741	0.00998004	0.00598802	0.0149701	0	0.10479	0.205589		*	TGA	0.644711	0.566866	0.626747	0.242515	0.0339321	0.00698603	0.00798403	0.00898204	0	0.116766		*	TGA	0.818363	0.628743	0.567864	0.672655	0.224551	0.0309381	0.0179641	0.010978	0.00499002	0		*	TGA	0.988024	0.998004	0.669661	1	1	0.999002	1	1	1
W	TGG	0.122754	0.779441	0.712575	0.568862	0.471058	0.0998004	0.236527	0.634731	0.274451	0.621756		W	TGG	0.567864	0.740519	0.775449	0.116766	0.938124	0.196607	0.462076	0.178643	0.764471	0.0199601		W	TGG	0.911178	0.328343	0.0239521	0.882236	0.393214	0.526946	0.884232	0.00299401	0.180639	0.921158		W	TGG	0.953094	0.863273	0.818363	0.825349	0.981038	0.597804	0.996008	0.566866	0.821357
T	ACC	1	1	1	1	1	0.999002	1	1	0.0359281	0.476048		T	ACC	1	1	1	1	1	0.94012	0.977046	1	0.994012	0.887226		T	ACC	0.982036	0.672655	0.99501	0.842315	0.874251	0	0.854291	0.103792	0.911178	0.325349		T	ACC	0	0	0	0	0	0	0	0	0
T	ACT	1	1	1	1	0.809381	0.929142	1	0.666667	0.418164	0.640719		T	ACT	1	1	1	0.994012	0.998004	0.859281	0.853293	0.659681	0.616766	0.702595		T	ACT	1	0.923154	0.827345	0.983034	0.812375	0.294411	0.976048	0.319361	0.730539	0.336327		T	ACT	0	0	0	0	0	0	0	0	0
T	ACA	1	1	0.994012	1	0.999002	1	0.98503	0.747505	0.273453	0.271457		T	ACA	1	1	1	1	1	0.996008	0.998004	0.396208	0.230539	0.113772		T	ACA	1	0.343313	0.175649	0.958084	0.454092	0.113772	0.00199601	0.466068	0.161677	0.0508982		T	ACA	0	0	0	0	0	0	0	0	0
T	ACG	1	0.999002	1	1	0.999002	0.600798	0.934132	0.87525	0.43014	0.522954		T	ACG	1	0.999002	1	0.998004	0.962076	0.795409	0.866267	0.835329	0.91517	0.646707		T	ACG	0.776447	0.174651	0.738523	0.56986	0.953094	0.411178	0.00499002	0.38523	0.58982	0.00798403		T	ACG	0	0	0	0	0	0	0	0	0
I	ATC	0.142715	0.0149701	0.357285	0.929142	0.902196	0.977046	0.5998	0.992016	0.537924	0.976048		I	ATC	0.371257	0.0179641	0.0638723	0.0918164	0.0489022	0.499002	0.126747	0.0808383	0.909182	0.720559		I	ATC	0.00598802	0.379242	0.578842	0.00499002	0.0209581	0.112774	0.304391	0.921158	0.740519	0.570858		I	ATC	0.972056	0.898204	0.916168	0.969062	0.893214	0.916168	0.776447	0.525948	0.413174
I	ATT	0.42016	0.41517	0.780439	0.408184	0.403194	0.229541	0.125749	0.919162	0.999002	0.467066		I	ATT	0.690619	0.978044	0.899202	0.325349	0.715569	0.754491	0.888224	0	0.635729	0.443114		I	ATT	0.93014	0.881238	0.582834	0.705589	0.0269461	0.379242	0.0469062	0.0698603	0.894212	0.652695		I	ATT	1	0.986028	0.976048	0.947106	0.899202	0.825349	0.661677	0.906188	0.473054
I	ATA	0.924152	0.737525	0.411178	0.712575	0.0239521	0.134731	0.130739	0.818363	0.0978044	0.451098		I	ATA	0.0868263	0.532934	0.125749	0.635729	0.0299401	0.373253	0.733533	0.59481	0.0768463	0.692615		I	ATA	0.000998004	0.708583	0.697605	0.705589	0.219561	0.0499002	0.478044	0.315369	0.282435	0.959082		I	ATA	1	1	1	0.933134	1	0.991018	0.908184	0.906188	0.983034
M	ATG	0.0229541	0.341317	0.46008	0.918164	0.354291	0.437126	0.942116	0.0349301	0.463074	0.959082		M	ATG	0.377246	0.137725	0.0628743	0.567864	0.577844	0.0279441	0.458084	0.217565	0.61976	0.841317		M	ATG	0.346307	0.746507	0.180639	0.0968064	0.00199601	0.4002	0.0139721	0.235529	0.134731	0.918164		M	ATG	0.999002	0.997006	0.98503	0.957086	0.927146	0.496008	0.89022	0.798403	0.660679
N	AAC	0	0.000998004	0.43513	0.591816	0.636727	0.818363	0.0798403	0.941118	0.717565	0.58483		N	AAC	0.0508982	0.194611	0.00698603	0.155689	0.295409	0.168663	0.290419	0.330339	0.135729	0.0858283		N	AAC	0.127745	0.0219561	0.517964	0.151697	0.826347	0.11477	0.163673	0.121756	0.9002	0.482036		N	AAC	0.99501	0.984032	0.937126	0.989022	0.964072	0.947106	0.97505	0.363273	0.91018
N	AAT	0.46507	0.00998004	0.618762	0.327345	0.372255	0.700599	0.0918164	0.0978044	0.971058	0.417166		N	AAT	0.00499002	0.389222	0.0429142	0.758483	0.207585	0.0688623	0.155689	0.0489022	0.314371	0.858283		N	AAT	0.304391	0.934132	0.878244	0.700599	0.126747	0.367265	0.187625	0.134731	0.0878244	0.145709		N	AAT	1	1	1	0.97006	1	0.809381	0.993014	0.963074	0.957086
K	AAA	0.0439122	0	0.0379242	0.0209581	0.255489	0.40519	0.0868263	0.295409	0.00499002	0.464072		K	AAA	0.0219561	0.0628743	0	0	0.660679	0.0269461	0	0.0359281	0.0578842	0.000998004		K	AAA	0.250499	0.454092	0.93513	0.698603	0.334331	0.585828	0.11477	0.983034	0.266467	0.103792		K	AAA	1	1	0.967066	0.99501	0.999002	0.987026	0.986028	0.5998	0.868263
K	AAG	0.222555	0.888224	0.252495	0.0998004	0.152695	0.728543	0.474052	0.443114	0.951098	0.737525		K	AAG	0.0858283	0.170659	0	0.0698603	0.0838323	0.0149701	0.0269461	0.728543	0.291417	0.248503		K	AAG	0.402196	0.598802	0.771457	0.883234	0.722555	0.135729	0.573852	0.011976	0.118762	0.567864		K	AAG	1	1	1	0.994012	1	0.863273	1	0.749501	0.904192
S	AGC	0.550898	0.826347	0.330339	0.214571	0.0798403	0.863273	0.804391	0.644711	0.649701	0.515968		S	AGC	0.265469	0.0798403	0.782435	0.560878	0.691617	0.131737	0.265469	0.0479042	0.0828343	0.340319		S	AGC	0.252495	0.282435	0.190619	0.698603	0.844311	0.120758	0.348303	0.273453	0.165669	0.653693		S	AGC	1	0.998004	0.973054	0.992016	0.999002	0.976048	0.634731	0.603792	0.93014
S	AGT	0.623752	0.369261	0.861277	0.000998004	0.0998004	0.111776	0.748503	0.0658683	0.486028	0.186627		S	AGT	0.327345	0.887226	0.190619	0.287425	0.790419	0.709581	0.169661	0.201597	0.0718563	0.277445		S	AGT	0.399202	0.0868263	0.457086	0.654691	0.174651	0.683633	0.0279441	0.301397	0.00698603	0.252495		S	AGT	1	1	0.999002	0.989022	0.962076	0.963074	0.999002	1	0.957086
R	AGA	0.466068	0.000998004	0.372255	0.166667	0.010978	0.505988	0.180639	0.0838323	0.842315	0.291417		R	AGA	0.131737	0.858283	0.00798403	0.0239521	0.0209581	0.115768	0.0459082	0.101796	0.241517	0.266467		R	AGA	0.183633	0.155689	0.786427	0.346307	0.149701	0.621756	0.125749	0.0618762	0.358283	0.959082		R	AGA	1	1	1	0.998004	1	1	1	1	1
R	AGG	0.0668663	0.339321	0.0808383	0.873253	0.262475	0.780439	0.536926	0.602794	0.520958	0.295409		R	AGG	0.107784	0.0938124	0.00199601	0.00698603	0.00499002	0.125749	0	0.182635	0.0758483	0.56487		R	AGG	0.659681	0.155689	0.215569	0.258483	0.573852	0.51497	0.238523	0.0538922	0.573852	0.494012		R	AGG	1	0.999002	0.997006	1	1	1	0.999002	0.999002	0.993014
A	GCC	0.803393	0.634731	0.361277	0.0618762	0.541916	0.706587	0.668663	0.384232	0.779441	0.771457		A	GCC	0.894212	0.50499	0.944112	0.598802	0.749501	0.56986	0.389222	0.9501	0.332335	0.38024		A	GCC	0.143713	0.230539	0.163673	0.0548902	0.882236	0.156687	0.129741	0.267465	0.386228	0		A	GCC	1	0.892216	1	1	1	0.993014	0.973054	0.823353	0.94012
A	GCT	0.476048	0.145709	0.906188	0.010978	0.616766	0.847305	0.5499	0.845309	0.0329341	0.623752		A	GCT	0.0419162	0.518962	0.548902	0.994012	0.270459	0.786427	0.737525	0.699601	0.585828	0.781437		A	GCT	0.884232	0.269461	0.969062	0.749501	0.96507	0.746507	0.0818363	0.533932	0.270459	0.118762		A	GCT	0.961078	0.894212	0.677645	0.550898	0.869261	0.870259	0.721557	0.241517	0.723553
A	GCA	0.314371	0.224551	0.670659	0.963074	0.277445	0.0538922	0.0259481	0.528942	0.295409	0.245509		A	GCA	0.372255	0.0259481	0.860279	0.779441	0.0139721	0.972056	0.222555	0.00798403	0.0928144	0.906188		A	GCA	0.174651	0.010978	0.419162	0.011976	0.0359281	0.932136	0.177645	0.443114	0.175649	0.621756		A	GCA	0.993014	1	0.933134	0.889222	0.878244	0.57984	0.0568862	0.741517	0.636727
A	GCG	0.232535	0.635729	0.0628743	0.0439122	0.122754	0.172655	0.283433	0.266467	0.971058	0.153693		A	GCG	0.258483	0.576846	0.454092	0.294411	0.657685	0.683633	0.944112	0.167665	0.698603	0.483034		A	GCG	0.203593	0.682635	0.351297	0.0748503	0.0469062	0.278443	0.620758	0.231537	0.704591	0.0389222		A	GCG	0.998004	0.886228	0.964072	0.643713	0.993014	1	0.646707	0.889222	0.758483
V	GTC	0.372255	0.804391	0.605788	0.919162	0.43513	0.462076	0.767465	0.118762	0.889222	0.491018		V	GTC	0.681637	0.453094	0.58483	0.520958	0.907186	0.92515	0.538922	0.363273	0.896208	0.443114		V	GTC	0.166667	0.695609	0.274451	0.267465	0.781437	0.374251	0.827345	0.0149701	0.9002	0.402196		V	GTC	0.999002	0.978044	0.774451	0.322355	0.871257	0.696607	0.693613	0.273453	0.141717
V	GTT	0.00698603	0.724551	0.530938	0.0439122	0.752495	0.842315	0.0489022	0.60479	0.919162	0.47505		V	GTT	0.431138	0.536926	0.299401	0.0309381	0.0439122	0.274451	0.288423	0.650699	0.964072	0.999002		V	GTT	0.481038	0.929142	0.275449	0.259481	0.0638723	0.0189621	0.231537	0.0598802	0.45509	0.9501		V	GTT	0.987026	0.957086	0.522954	0.708583	0.626747	0.906188	0.817365	0.396208	0.282435
V	GTA	0.851297	0.50499	0.680639	0.392216	0.110778	0.784431	0.110778	0.57984	0.510978	0.5		V	GTA	0.381238	0.865269	0.983034	0.377246	0.664671	0.387226	0.0528942	0.00998004	0.782435	0.0948104		V	GTA	0.487026	0.258483	0.630739	0.0528942	0.44012	0.224551	0.0229541	0.0359281	0.237525	0.281437		V	GTA	1	0.793413	0.893214	0.992016	0.946108	0.761477	0.360279	0.194611	0.580838
V	GTG	0.399202	0.530938	0.602794	0.88523	0.489022	0.321357	0.855289	0.103792	0.681637	0.491018		V	GTG	0.0499002	0.199601	0.367265	0.0768463	0.661677	0.850299	0.00898204	0.00499002	0.45509	0.740519		V	GTG	0.648703	0.365269	0.0958084	0.797405	0.355289	0.297405	0.00399202	0.0359281	0.498004	0.00399202		V	GTG	0.999002	0.979042	0.710579	0.994012	0.953094	0.270459	0.797405	0.4501	0.0678643
D	GAC	0.483034	0.663673	0.0838323	0.982036	0.0349301	0.96008	0.497006	0.00598802	0.54491	0.0518962		D	GAC	0.62475	0.668663	0.526946	0.785429	0.96008	0.368263	0.791417	0.714571	0.0948104	0.497006		D	GAC	0.0528942	0.132735	0.255489	0.858283	0.0948104	0.0379242	0.00199601	0.213573	0.0988024	0.0249501		D	GAC	0.963074	0.957086	0.893214	0.512974	0.956088	0.488024	0.683633	0.295409	0.351297
D	GAT	0.411178	0.484032	0.572854	0.484032	0.0359281	0.94012	0.121756	0.239521	0.249501	0.0798403		D	GAT	0.0858283	0.153693	0.0429142	0.628743	0.136727	0.497006	0.456088	0.306387	0.0139721	0.827345		D	GAT	0.487026	0.340319	0.156687	0.198603	0.0638723	0.683633	0.512974	0.150699	0.0319361	0.770459		D	GAT	0.998004	0.989022	1	0.552894	0.969062	0.889222	0.997006	0.865269	0.967066
E	GAA	0.215569	0.225549	0.393214	0.0828343	0.422156	0.340319	0.652695	0.525948	0.530938	0.585828		E	GAA	0.0828343	0.000998004	0.416168	0.129741	0.598802	0.53992	0.39521	0.541916	0.817365	0.521956		E	GAA	0.862275	0.562874	0.0718563	0	0.861277	0.317365	0.327345	0.0918164	0.103792	0.0808383		E	GAA	0.978044	1	0.5499	0.461078	0.913174	0.251497	0.0868263	0.982036	0.283433
E	GAG	0.306387	0.654691	0.408184	0.424152	0.48004	0.878244	0.635729	0.168663	0.0189621	0.216567		E	GAG	0.144711	0.0558882	0.10479	0.173653	0.663673	0.0788423	0.477046	0.814371	0.356287	0.0259481		E	GAG	0.957086	0.906188	0.804391	0.147705	0.269461	0.00898204	0.0449102	0.158683	0.00499002	0.0319361		E	GAG	0.999002	0.997006	0.997006	0.968064	0.992016	0.291417	0.399202	0.464072	0.969062
G	GGC	0.199601	0.273453	0.00998004	0.531936	0.160679	0.00998004	0.511976	0.166667	0.43513	0.0798403		G	GGC	0.0319361	0	0.0469062	0.888224	0.708583	0.716567	0.396208	0.633733	0	0		G	GGC	0.331337	0.224551	0.371257	0.792415	0.800399	0.674651	0.943114	0.43014	0.00299401	0.144711		G	GGC	1	0.973054	0.754491	0.687625	0.977046	0.919162	0.715569	0.206587	0.182635
G	GGT	0.194611	0.0778443	0.0678643	0.922156	0.143713	0.155689	0.286427	0.239521	0.204591	0.158683		G	GGT	0.434132	0.320359	0.347305	0.999002	0.00199601	0.936128	0.764471	0.0688623	0.00598802	0.211577		G	GGT	0.901198	0.616766	0.218563	0.427146	0.0828343	0.315369	0.217565	0.315369	0.211577	0.141717		G	GGT	1	0.705589	0.99002	0.513972	0.968064	0.967066	0.386228	0.733533	0.766467
G	GGA	0.0518962	0.731537	0.123752	0.506986	0.797405	0.0658683	0.280439	0.170659	0.684631	0.49501		G	GGA	0.337325	0.501996	0.807385	0.46008	0.459082	0.98004	0.44511	0.0528942	0.0289421	0.186627		G	GGA	0.931138	0.790419	0.547904	0.0768463	0.0668663	0.5499	0.893214	0.332335	0.332335	0.0329341		G	GGA	1	0.999002	0.998004	0.999002	0.91018	0.54491	0.155689	0.793413	0.9501
G	GGG	0.0399202	0.00199601	0.0489022	0.00499002	0.611776	0.428144	0.277445	0.00798403	0.0788423	0.157685		G	GGG	0.0259481	0.244511	0.200599	0.150699	0.112774	0.239521	0.113772	0.279441	0.000998004	0.378244		G	GGG	0.937126	0.154691	0.453094	0.236527	0.270459	0.290419	0.0658683	0.786427	0.0528942	0		G	GGG	1	0.988024	0.815369	0.996008	0.99002	0.773453	0.94511	0.378244	0.311377
[truncated: 12 more columns]

## Sheet: Heatmap for codons in sites
Stop efficiency at the corresponging triplet while located in the ribosome sites								P-values for shuffled datasets exceeding experimental data of stop efficiency at the corresponging triplet while located in the ribosome sites
		Ribosome sites								Ribosome sites
		-2	E	P	A	2				-2	E	P	A	2
P	CCC	-0.0105838	-0.0144201	-0.0186715	-0.0104147	-0.00286658		P	CCC	0.97006	1	1	1	0.889222
P	CCT	-0.00890076	-0.0137668	-0.0150972	-0.0110681	-0.00207982		P	CCT	0.5998	1	1	1	0.736527
P	CCA	-0.00673332	-0.0146591	-0.0159539	-0.00962916	0.000115355		P	CCA	0.0189621	1	1	1	0.341317
P	CCG	-0.00804609	-0.0126951	-0.0136872	-0.0105834	-0.00257564		P	CCG	0.174651	1	1	1	0.889222
L	CTC	-0.0104537	-0.00910063	-0.0100731	-0.0115408	-0.00255196		L	CTC	0.884232	0.691617	0.971058	1	0.727545
L	CTT	-0.0105758	-0.00593865	-0.0121667	-0.0193812	-0.0042833		L	CTT	0.863273	0.0638723	0.991018	1	0.863273
L	CTA	-0.00987399	0.00284216	-0.00529445	-0.0460191	-0.00175475		L	CTA	0.723553	0	0.192615	1	0.581836
L	CTG	-0.00797396	-0.00619035	-0.00652624	-0.011902	-0.000896473		L	CTG	0.255489	0.0648703	0.328343	1	0.427146
H	CAC	-0.00807683	-0.00714914	-0.00506321	-0.0092507	-0.000105658		H	CAC	0.158683	0.189621	0.0538922	1	0.194611
H	CAT	-0.00900873	-0.0042605	-0.00976305	-0.0108037	0.00091684		H	CAT	0.685629	0.0638723	0.968064	1	0.4002
Q	CAA	-0.00711249	0.000751432	0.00608726	-0.0136907	0.00534422		Q	CAA	0.227545	0	0	1	0.0409182
Q	CAG	-0.00513726	-0.00446616	-0.00483248	-0.0149494	-0.00151096		Q	CAG	0.000998004	0.00399202	0.0618762	1	0.675649
R	CGC	-0.0100112	-0.00937033	-0.00383168	-0.00646045	-0.00618107		R	CGC	0.89022	0.863273	0.000998004	1	1
R	CGT	-0.0104342	-0.0101309	-0.00638028	-0.00929229	-0.00274095		R	CGT	0.939122	0.954092	0.292415	1	0.851297
R	CGA	-0.00632011	-0.0056939	-0.0114166	-0.0174914	-0.00312052		R	CGA	0.0169661	0.0339321	0.997006	1	0.878244
R	CGG	-0.00669068	-0.00492174	-0.00275888	-0.00844821	-0.00144396		R	CGG	0.0169661	0.000998004	0	1	0.701597
S	TCC	-0.00954678	-0.0104304	-0.00657052	-0.0087439	-0.00195556		S	TCC	0.644711	0.906188	0.230539	1	0.459082
S	TCT	-0.00644891	-0.0075323	-0.00348079	-0.012079	0.000970818		S	TCT	0.131737	0.397206	0.0339321	1	0.164671
S	TCA	-0.0068605	-0.00550318	-0.00452154	-0.0126746	-0.00471972		S	TCA	0.140719	0.0788423	0.239521	1	0.961078
S	TCG	-0.00682404	-0.008489	-0.00588474	-0.0099988	-0.00301601		S	TCG	0.0489022	0.540918	0.290419	1	0.857285
F	TTC	-0.0144393	-0.00841404	-0.00381993	-0.00740588	-0.00146881		F	TTC	1	0.533932	0.0489022	0.99002	0.500998
F	TTT	-0.00513093	-0.00247861	-0.00581	-0.00407758	0.00435478		F	TTT	0.202595	0.0229541	0.557884	0.978044	0.113772
L	TTA	-0.00939869	-0.00150031	-0.00209308	-0.020045	0.00117106		L	TTA	0.9002	0.00998004	0.261477	1	0.449102
L	TTG	-0.00433669	-0.00175211	0.00036731	-0.0131344	-0.000285893		L	TTG	0.0159681	0.00199601	0	1	0.640719
Y	TAC	-0.00909696	-0.00868658	-0.00445208	-0.0132163	-0.00679799		Y	TAC	0.565868	0.618762	0.0758483	1	0.992016
Y	TAT	-0.00196993	-0.00499346	-0.0096349	-0.0194995	-0.000187113		Y	TAT	0.0499002	0.458084	0.989022	1	0.888224
*	TAA	0	0	0	-0.0327641	0.0107176		*	TAA	0.00299401	0.0189621	0.105788	1	0.00998004
*	TAG	0	0	0	-0.0325542	0.00878263		*	TAG	0.000998004	0	0.00598802	1	0.00199601
C	TGC	-0.0100016	-0.00783119	-0.006929	-0.0117767	-0.00183604		C	TGC	0.740519	0.303393	0.361277	1	0.535928
C	TGT	-0.00686425	-0.00500108	-0.00831176	-0.0126222	-0.000380418		C	TGT	0.221557	0.142715	0.931138	1	0.461078
*	TGA	0	0	0	-0.0258144	0.00201313		*	TGA	0	0.000998004	0.0149701	1	0.265469
W	TGG	-0.00812427	-0.00772061	-0.00606279	-0.00787635	-0.00299383		W	TGG	0.371257	0.497006	0.50499	1	0.928144
T	ACC	-0.0263093	-0.0240562	-0.00996082	0.13042	0.00401368		T	ACC	1	1	0.957086	0	0
T	ACT	-0.0291215	-0.0238503	-0.016577	0.180909	0.00473228		T	ACT	1	1	1	0	0.00598802
T	ACA	-0.0301049	-0.0303609	-0.0107343	0.257099	0.00911615		T	ACA	1	1	0.997006	0	0
T	ACG	-0.0190043	-0.0197179	-0.00667685	0.110276	0.00652624		T	ACG	1	1	0.431138	0	0
I	ATC	-0.0113428	-0.00337029	-0.000949089	-0.00975206	-0.00257201		I	ATC	0.917166	0.000998004	0.000998004	1	0.715569
I	ATT	-0.00745102	-0.00871685	-0.00539691	-0.0158238	-0.000928475		I	ATT	0.650699	0.876248	0.725549	1	0.677645
I	ATA	-0.00657813	-0.00108541	0.00287015	-0.0259067	0.00689871		I	ATA	0.625749	0.0359281	0.0139721	1	0.0788423
M	ATG	-0.00734034	-0.00417978	-5.47097e-05	-0.0132302	-0.00337487		M	ATG	0.388224	0.0668663	0.00598802	1	0.927146
N	AAC	-0.00512976	-0.00155754	-0.00258202	-0.0127472	0.0124558		N	AAC	0.0229541	0	0.0538922	1	0
N	AAT	-0.00261406	0.00126946	-0.00294673	-0.026265	0.0136434		N	AAT	0.0838323	0.00499002	0.422156	1	0
K	AAA	0.00382329	0.00818507	-0.00214187	-0.0203116	0.0151847		K	AAA	0	0	0.446108	1	0.000998004
K	AAG	-0.00740065	0.00228953	-0.005485	-0.022754	0.00625597		K	AAG	0.37525	0	0.515968	1	0.0149701
S	AGC	-0.00992826	-0.00690299	-0.0060652	-0.0145537	0.000714241		S	AGC	0.601796	0.0798403	0.179641	1	0.115768
S	AGT	-0.00464957	-0.00488203	-0.00102908	-0.0261592	0.00228063		S	AGT	0.0738523	0.208583	0.0379242	1	0.171657
R	AGA	-0.002184	0.000718658	-0.00203189	-0.0313093	0.00718276		R	AGA	0.000998004	0	0.115768	1	0.00499002
R	AGG	-0.00763195	0.000689007	-0.00486897	-0.0249194	0.00206669		R	AGG	0.203593	0	0.182635	1	0.0708583
A	GCC	-0.00927974	-0.0104835	-0.00444263	-0.0111547	-0.00184525		A	GCC	0.597804	0.946108	0.00199601	1	0.452096
A	GCT	-0.00784457	-0.00973101	-0.00914767	-0.00693197	-0.00308539		A	GCT	0.248503	0.813373	0.906188	0.997006	0.836327
A	GCA	-0.00790958	-0.00657878	-0.00255449	-0.00783564	-0.00119078		A	GCA	0.198603	0.0768463	0.00499002	1	0.581836
A	GCG	-0.0069542	-0.00874545	-0.00456843	-0.00937842	-0.00115872		A	GCG	0.0259481	0.545908	0.0159681	1	0.497006
V	GTC	-0.0102183	-0.00981669	-0.00651221	-0.00636061	-0.00321269		V	GTC	0.830339	0.88523	0.273453	0.991018	0.811377
V	GTT	-0.00543002	-0.00653901	-0.00404289	-0.00782358	0.000158563		V	GTT	0.118762	0.372255	0.163673	0.998004	0.417166
V	GTA	-0.00907453	-0.0073326	-0.00113642	-0.0101074	0.00262454		V	GTA	0.575848	0.45509	0.0139721	1	0.106786
V	GTG	-0.00878541	-0.00407191	-0.00306383	-0.00817414	-0.000900742		V	GTG	0.658683	0.00698603	0.0259481	1	0.720559
D	GAC	-0.00835595	-0.0102216	-0.00168775	-0.00670603	0.00181565		D	GAC	0.302395	0.883234	0	0.978044	0.0419162
D	GAT	-0.00519558	-0.00152625	-0.00238269	-0.0138821	0.00505035		D	GAT	0.172655	0.00898204	0.0758483	1	0.106786
E	GAA	-0.00567029	-0.00251374	-0.000474983	-0.0079811	0.0111874		E	GAA	0.0948104	0.0189621	0.0179641	0.997006	0
E	GAG	-0.00708987	-0.00365766	-0.00359082	-0.0122803	0.00785494		E	GAG	0.226547	0.00898204	0.0558882	1	0
G	GGC	-0.00605459	-0.00468909	-0.0069434	-0.00749303	-0.000114379		G	GGC	0.00299401	0	0.344311	1	0.127745
G	GGT	-0.00492221	-0.00567418	-0.0044793	-0.0090443	-0.00143035		G	GGT	0.0149701	0.163673	0.211577	1	0.703593
G	GGA	-0.00689329	-0.00721755	-0.00556864	-0.0114276	-0.0016128		G	GGA	0.0908184	0.304391	0.341317	1	0.704591
G	GGG	-0.0031186	-0.00361965	-0.00418888	-0.00762204	-0.000197882		G	GGG	0	0	0.0618762	1	0.498004

## Sheet: 2D codon heatmap
2-dimensional representation of stalling propensities with the corresponding codons located in the P- and A-sites
P\A		Codons located in the A-site
		CCC	CCT	CCA	CCG	CTC	CTT	CTA	CTG	CAC	CAT	CAA	CAG	CGC	CGT	CGA	CGG	TCC	TCT	TCA	TCG	TTC	TTT	TTA	TTG	TAC	TAT	TAA	TAG	TGC	TGT	TGA	TGG	ACC	ACT	ACA	ACG	ATC	ATT	ATA	ATG	AAC	AAT	AAA	AAG	AGC	AGT	AGA	AGG
P	CCC	-0.0293517	-0.0380325	-0.037591	-0.0391881	-0.0134019	-0.0259656	-0.0477773	-0.0147324	-0.0193753	-0.0200768	-0.0164308	-0.0236977	-0.011494	-0.0217936	-0.0217365	-0.0127615	-0.0207008	-0.0176395	-0.0151144	-0.0109394	-0.008204	-0.00228271	-0.0153942	-0.0356976	-0.000309231	-0.0348961	-0.118111	-0.0580955	-0.0269875	-0.0252956	-0.0824564	-0.0217357	0.0552371	0.0698896	0.0742905	0.0217582	-0.0201464	-0.0190986	-0.0324963	-0.010321	-0.0178956	-0.0301066	-0.00964048	-0.0170088	-0.0128523	-0.0142644	-0.025948	-0.0303505
P	CCT	-0.032248	-0.0239058	-0.0199458	-0.0191784	0.00674294	-0.0217517	-0.0822214	-0.00388202	-0.0147285	0.0115002	-0.00133195	-0.0363042	-0.00461635	-0.010853	-0.0224924	-0.0114996	-0.0244029	-0.0250052	-0.0132051	-0.00917842	-0.0221567	-0.013268	-0.0229602	0.00318645	-0.0357997	-0.0263651	-3.01824e-05	-0.0872529	-0.031644	-0.0225602	-0.057302	-0.0267706	0.0568486	0.103613	0.102083	0.0691506	-0.0162716	-0.0161707	-0.0251338	-0.00369695	-0.0310897	-0.0168778	-0.0305605	-0.0307406	-0.0297999	-0.0621733	-0.00695711	-0.0341332
P	CCA	-0.0388637	-0.0158195	-0.0350208	-0.0372331	-0.000962851	-0.0324337	-0.0546837	-0.0218983	-0.00708383	-0.0240187	-0.0170309	-0.0264326	-0.0238544	-0.0270662	-0.0234066	-0.0270304	-0.0176752	-0.00204432	-0.0214733	-0.0135843	0.0012321	0.00154175	-0.0108695	-0.0166146	-0.0335191	-0.05625	-0.0727848	-0.0362402	-0.0195822	-0.0340606	-0.053827	-0.00393634	0.0859416	0.152251	0.202785	0.0575201	-0.0111308	-0.0299142	-0.0264746	-0.0122745	-0.0249794	-0.0498913	-0.0228564	-0.0298223	-0.0275238	-0.033863	-0.0307715	-0.051937
P	CCG	-0.0316543	-0.0198747	-0.0250389	-0.0348479	-0.0238963	-0.0308966	-0.0453735	-0.00251596	-0.0293737	-0.0150476	-0.00778013	-0.0261964	-0.0127235	-0.011195	-0.0332511	-0.0142423	-0.0160439	-0.0104775	-0.00906607	-0.0119531	-0.014872	0.00314712	-0.0169953	-0.0254305	-0.0144972	-0.0305216	-0.0520942	-0.0781195	-0.0236298	-0.0300227	-0.00792403	-0.015526	0.0847983	0.136346	0.216217	0.0836311	-0.0101753	-0.00898268	-0.0337405	0.00468342	-0.0306927	-0.0464231	-0.0259189	-0.0447605	-0.0188644	-0.0324363	-0.0350486	-0.0368706
L	CTC	-0.0126478	-0.0197329	-0.00664779	-0.00747486	-0.0100219	-0.0174574	-0.027871	-0.0100338	-0.0124045	-0.0264515	0.00629854	-0.0239182	-0.0147042	-0.00345195	-0.0162132	-0.0107654	-0.011714	-0.00896756	-0.029254	-0.0151885	-0.0204053	-0.0102864	-0.0179718	-0.0305923	-0.0107521	-0.0262446	-0.0229896	-0.035913	-0.0142311	-0.0223681	-0.0137639	-0.00569034	0.122216	0.112483	0.189455	0.0893713	-0.0114182	-0.0197781	-0.0242744	-0.0237783	-0.0236791	-0.0206665	-0.0104226	0.00325237	-0.0187693	-0.0404225	-0.0770918	-0.0193417
L	CTT	-0.0279873	-0.00278291	0.00729083	0.00242022	-0.0191467	-0.0208245	-0.0719629	-0.0306388	0.00107929	-0.0291076	-0.0295179	-0.0309518	-0.0264575	0.00180058	-0.0358448	-0.0110776	-0.00827342	0.00592794	-0.0433454	-0.0208921	-0.0184621	-0.0135176	-0.0472119	-0.00144934	-0.00500837	-0.0214025	-0.0525872	-0.0780945	0.0111796	-0.0539406	0.0131519	-0.0132216	0.0927201	0.165526	0.157986	0.090172	-0.0160144	0.0176694	0.00171152	-0.0296406	0.00977164	-0.0312732	-0.00582726	-0.0422174	-0.0258801	-0.0175833	-0.0981498	-0.0371856
L	CTA	-0.0123614	-0.0110097	-0.0120564	-0.0102239	-0.0121836	-0.0310043	-0.0163951	-0.0175236	-0.0271749	-0.0277043	-0.0158263	0.0123188	-0.0304049	-0.0424555	-0.0179665	-0.020231	-0.00246455	0.00466472	0.00593049	-0.0404815	-0.0342287	-0.0233978	-0.00782014	-0.0292995	-0.0217225	0.0228272	0.00836075	0.0110303	-0.00827302	-0.00643344	-0.0855891	-0.005502	0.19346	0.164514	0.366458	0.118458	-0.00147472	-0.0819667	-0.0193784	0.0119808	-0.0280565	-0.0450583	0.00188627	-0.0583869	-0.00573963	-0.0770023	-0.0882966	-0.0126519
L	CTG	-0.00937603	-0.0045195	-0.0105052	0.0029981	-0.00738124	-0.0152624	-0.0497837	0.0081344	-0.00866272	-0.0209416	0.00311593	-0.0187023	-0.00962517	-0.0113917	-0.0115562	-0.0168245	-0.00543345	-0.0143769	-0.0122382	0.00103197	-0.0116618	-0.0090788	-0.0205042	-0.027309	-0.047994	-0.0160995	-0.0447064	-0.0243004	-0.0184889	-0.00393089	-0.00836875	0.00412434	0.14874	0.164549	0.263874	0.12983	-0.0182101	0.0258338	-0.0647588	-0.00937457	0.0034574	-0.0189907	-0.0306459	-0.0466024	-0.0141205	-0.067483	-0.0603638	-0.0617435
H	CAC	-0.0143369	-0.0105162	-0.00645088	-0.0142124	-0.00741452	-0.0128319	-0.0252386	-0.0168093	-0.0164271	-0.000185998	-0.0109234	-0.00812241	0.00406652	-0.0123778	-0.00252807	-0.0178751	-0.00576145	-0.0314053	-0.00719111	-0.0117899	-0.00799076	-0.00285475	-0.0153298	-0.0160128	-0.0110773	-0.0127556	-0.00842353	-0.00945397	-0.0169559	-0.0085321	-0.001676	-0.00375088	0.0674109	0.082339	0.140142	0.0724966	-0.0165198	-0.0169025	-0.00160111	-0.0185812	-0.00576993	-0.0237705	-0.0112254	-0.0187138	-0.0137284	0.00132164	-0.0095823	-0.0236028
H	CAT	-0.0204014	-0.0132556	0.00437294	-0.0113629	-0.0162565	-0.00034772	-0.0378101	-0.00184568	0.000283125	-0.00572088	-0.0239106	-0.0174029	-0.0212309	-0.016848	-0.0423884	0.0018157	-0.00192453	-0.0346688	-0.023729	-0.00249933	-0.0220098	-0.0109115	-0.0271213	-0.00600926	-0.0186745	-0.0450486	-0.0164454	-0.0426286	-0.0120359	-0.00298224	-0.0118454	-0.0210074	0.109683	0.174887	0.143999	0.0306473	-0.0241165	0.00243268	-0.0466452	-0.0214237	-0.00656791	-0.0301278	-0.0336212	-0.00423014	-0.00800982	-0.0797171	-0.0190934	-0.0156403
Q	CAA	-0.000818792	-0.00119353	-0.012338	-0.0150771	-0.0184501	-0.0382382	-0.0359176	-0.0106131	-0.00299455	0.00768174	-0.0111971	-0.0311294	-0.00120436	-0.00652713	-0.00970844	0.00956404	0.00232796	-0.0175042	-0.0236177	-0.00941486	0.00820756	0.000433504	0.00369484	-0.0426059	-0.0222266	-0.00179626	-0.011881	0.0207458	-0.0121143	0.0116396	-0.00236223	-0.0191125	0.160555	0.252696	0.334414	0.116837	-0.00407684	-0.0254049	-0.0372177	-0.00674864	0.0105339	-0.0352629	-0.0141032	-0.0131141	-0.0217843	0.00843036	-0.00570392	-0.0323093
Q	CAG	-0.0137192	-0.0173839	0.00449236	-0.00631305	-0.00554925	-0.0176114	-0.0623527	-0.00779505	-0.00404838	-0.0207675	-0.0162601	-0.0138857	2.79823e-05	-0.00709613	-0.0391435	-0.0149595	0.000141694	-0.0216615	-0.00119995	-0.0170548	-0.0177145	-0.0236245	-0.063455	-0.000812527	-0.0260033	-0.0237393	-0.00249956	-0.0365097	-0.0104772	-0.00761415	-0.0323746	0.00670139	0.170014	0.0829889	0.275816	0.0883174	-0.0164989	-0.0392036	-0.0223525	-0.0115801	-0.0177906	-0.0208056	0.00163839	-0.0341596	-0.0329913	0.00423835	-0.000452334	-0.0266915
R	CGC	-0.00335345	-0.0155592	-0.0150435	-0.00619888	-0.00491021	-0.00486123	-0.0287424	-0.0140635	-0.0187844	-0.0140283	-0.00979736	-0.0123564	-0.00945452	-0.014628	-0.0097014	-0.00931267	-0.0058224	-0.00715874	-0.0205952	-0.00632791	-0.00551093	-0.00417294	-0.0202759	-0.015707	-0.0252884	-0.0515933	-0.00594658	-0.00468275	-0.0130462	-0.0314691	0.00393512	0.00378939	0.144637	0.208774	0.225887	0.103185	-0.0141921	-0.0254255	-0.00956665	-0.0283154	-0.0149924	-0.00866548	-0.0263996	-0.00402528	-0.00818577	-0.0551087	-0.0214573	-0.00870754
R	CGT	-0.0179636	-0.000986929	-0.0059123	-0.0102019	-0.0143468	-0.00204714	-0.0272299	-0.00398675	-0.0171151	-0.0317815	-0.00152566	-0.0103659	-0.000813754	-0.00389941	-0.033624	-0.0166452	-0.0153353	-0.0146704	-0.0173181	-0.00804112	-0.0223863	0.00477366	-0.022063	-0.0334284	-0.0158437	-0.00585359	-0.0378777	0.00861031	0.00286308	-0.00614074	8.45971e-05	-0.00907325	0.143496	0.202619	0.309312	0.150873	-0.00654103	0.012191	-0.0204914	-0.0451926	-0.00896864	-0.067313	-0.000338446	-0.0455496	-0.0257394	-0.0130632	-0.0328284	-0.051943
R	CGA	-0.0102861	-0.00778182	-0.0105986	-0.0126293	-0.0253662	-0.0348148	-0.0803714	-0.0308154	-0.00950968	0.00856895	-0.0215225	-0.0465336	-0.00106719	-0.0283865	-0.0410179	-0.00499273	-0.0175507	-0.0289504	-0.0277155	-0.0117498	0.00948565	-0.0318241	-0.0574164	-0.0201992	-0.0191257	-0.0403741	0.00253582	-0.0178085	-0.0269365	-0.0373791	-0.0242793	-0.0222329	0.180237	0.22251	0.221065	0.117693	0.000463969	-0.0570233	-0.00599927	-0.0208659	-0.0339377	-0.0730884	-0.0182418	-0.051012	-0.000441358	-0.06202	-0.0523256	-0.00143748
R	CGG	-0.00202994	-0.0133663	-0.00274624	-0.00313642	-0.00944376	-0.0366374	-0.0426723	-0.0088207	-0.0033168	-0.0119884	-0.00693188	-0.023426	-0.00704946	0.00181766	-0.0145367	-0.00150875	-0.00975218	-0.000673399	0.00619972	-0.0105365	-0.003653	-0.0197163	-0.0214195	-0.0097003	-0.0182643	-0.0056918	-0.0609773	-0.0628001	-0.0130446	-0.0227689	-0.0393204	-0.00840627	0.146506	0.170705	0.23172	0.124268	-0.0182113	-0.0125903	-0.0156937	0.00104406	-0.0170797	-0.0485355	-0.0314386	0.016833	-0.0146214	-0.0383488	-0.0360172	-0.00461585
S	TCC	-0.00397392	-0.00242015	-0.00389145	-0.0163005	-0.00403042	0.00615536	-0.0394438	-0.00866672	-0.00957176	-0.00578729	-0.0187036	-0.00440112	-0.0164943	0.0023088	-0.0244706	-0.0115349	-0.0043116	-0.010171	-0.0133336	-0.0121868	-0.0191214	-0.0180163	-0.0272856	-0.0113006	-0.00660703	0.0127917	-0.0168615	-0.0394175	-0.00209097	-0.0236014	-0.0377953	-0.00979919	0.099211	0.113794	0.127378	0.0878298	0.00882052	-0.0322874	-0.0291567	-0.0221099	-0.00908443	-0.0314001	-0.0386369	-0.0181246	-0.0127341	-0.0262504	-0.0236508	-0.0350353
S	TCT	-0.00758088	-0.00487295	-0.0209928	-0.00396673	-0.0172921	-0.0101018	0.00152385	-0.0177593	-0.00271753	0.00113725	-0.0346315	-0.0113391	-0.0103478	-0.0102108	-0.0112249	-0.0099846	-0.00989337	-0.00628047	-0.0155209	-0.00875167	0.00818404	-0.00534635	-0.0261138	0.00279618	-0.0149015	0.00651742	0.0202592	-0.030712	-0.0050893	-0.000538436	-0.00597261	0.00369574	0.130883	0.190707	0.282307	0.123444	-0.0214974	-0.0177375	-0.0231406	0.000940062	0.00682147	-0.0570874	-0.0197321	-0.0123068	-0.0211317	-0.0326644	0.000135478	-0.0210223
S	TCA	-0.0100301	-0.0186656	0.00965633	-0.019917	-0.0152312	-0.0146776	-0.0754292	-0.0108278	0.0148277	-0.0225255	0.0124085	-0.00234883	0.0122736	-0.010393	-0.0358454	-0.00392634	-0.0150231	-0.02222	-0.0395156	-0.0397619	-0.0255141	0.00167996	-0.0313837	-0.0245964	-0.016057	-0.0177592	-0.0554159	-0.0428123	-0.00310705	-0.0155461	0.00654896	0.00420192	0.14416	0.13046	0.298747	0.138262	-0.0119159	-0.0357297	-0.0359939	-0.00281681	-0.00819837	0.0113701	-0.00405407	-0.0290266	-0.0361092	0.000596638	-0.0463298	-0.0442004
S	TCG	-0.00250437	0.00102496	-0.0056099	-0.0158149	-0.0128919	-0.0101573	-0.0372099	-0.0184618	-0.01104	-0.00278305	-0.0230177	-0.0256553	-0.00150374	-0.00827312	-0.0294626	-0.00923545	-0.0228355	-0.00372693	-0.00172941	-0.0164927	0.00534072	0.0050627	0.00079328	-0.038931	-0.0175286	-0.0134128	-0.0492536	-0.0133131	-0.00830622	-0.0220709	-0.0690973	-0.00473209	0.140387	0.125753	0.197967	0.110376	-0.00969815	-0.0409901	-0.0463723	-0.0161269	-0.00869144	-0.0632077	-0.0418894	-0.0136179	-0.00836987	-0.0126827	-0.0132905	0.00720339
F	TTC	-0.0135302	0.0122474	0.0184233	-0.0143062	-0.0244463	0.0173569	-0.0591431	-0.0353121	-0.00759238	-8.7511e-05	-0.0112136	-0.00233291	-0.000485167	0.0128335	-0.0426251	-0.00668968	-0.000935487	0.0145469	-0.0775665	-0.00882008	-0.00629725	-0.0182975	-0.0111934	-0.00931041	0.0152593	0.0164712	-0.0526903	-0.0277252	-0.01824	-0.0156161	-0.00811616	-0.00224907	0.107477	0.163944	0.130069	0.0682749	-0.0302613	0.0091766	-0.0134868	-0.0162942	0.00620443	-0.0162179	-0.00370904	-0.0473416	-0.0309254	-0.0214671	-0.0384406	-0.0519006
F	TTT	-0.00716322	-0.0172568	-0.00843742	-0.00466178	-0.0258348	0.0103393	-0.0062222	-0.0179862	-0.000591647	0.00338993	-0.0254762	-0.0127873	-0.0168044	-0.0010139	-0.0276201	-0.0232736	-0.0063	0.000487165	-0.0241194	-0.0170324	0.00331099	0.000381585	-0.0124191	0.019234	-0.0157128	-0.00354763	-0.046032	-0.0105773	-0.0181958	-0.00279113	0.0112605	-0.00326265	0.103912	0.171384	0.227954	0.0906753	-0.00742908	-0.0639703	-0.0305692	-0.00988739	-0.0498703	0.00111137	-0.0277074	0.0214341	-0.034393	0.0104981	-0.0436041	-0.0338867
L	TTA	-0.0191941	-0.028584	-0.0422709	-0.00504966	-0.0101574	-0.0137359	-0.0564094	-0.00888823	0.0431714	-0.0148384	0.0122515	-0.00298526	-0.021738	-0.00300255	0.00144573	-0.0136837	-0.0195189	-0.00123056	0.000781388	-0.0105515	-0.0343915	-0.0188629	-0.0114182	0.00417631	-0.0160216	-0.0558318	-0.0360854	-0.0235598	-0.0209091	-0.00367842	-0.0399604	-0.0206448	0.199267	0.262212	0.290109	0.151086	-0.0183527	0.0229384	-0.0453466	-0.0194831	-0.0246258	-0.0206397	0.0106614	0.0162541	-0.0522668	-0.0424614	-0.0583417	-0.0134333
L	TTG	-0.0164112	0.00352337	-0.00175638	-0.0193371	-0.0038233	-0.026433	-0.0624519	-0.00828562	-0.014526	0.000126606	3.44342e-05	-0.0127314	-0.00859381	-0.0154063	-0.00301065	-0.013445	-0.00694826	0.0180858	0.0121527	-0.0146666	-0.00852427	-0.000892972	-0.0570328	-0.00514538	-0.0156935	0.00721921	0.000307606	0.0401502	0.00840781	-0.0341336	0.0147589	-0.0170445	0.182845	0.164512	0.334886	0.169662	-0.00830048	-0.0127893	-0.0139409	-0.0235516	-0.0293481	-0.0582173	-0.0622163	-0.0091008	0.00389353	-0.00364689	-0.0425089	-0.0322667
Y	TAC	-0.0184826	-0.0248127	0.00334608	-0.0146075	-0.0278607	-0.0273934	-0.0630291	-0.0124541	-0.00553942	-0.0180862	-0.04716	-0.0124842	-0.0382943	-0.0260665	-0.0339912	0.00642613	-0.0028363	-0.0262548	-0.0313013	-0.0294836	-0.00991218	0.0158301	-0.0159306	0.0109057	-0.0136924	-0.0093481	0.0011015	-0.0358944	-0.0163093	-0.00460951	0.025994	0.00265548	0.152773	0.177275	0.326597	0.109557	-0.00347615	-0.0232588	-0.0544257	-0.0324499	-0.0286536	-0.0056888	0.00625131	-0.0292151	-0.0279567	-0.056341	-0.0283632	-0.0242664
Y	TAT	-0.0142608	-0.0108465	0.00523659	0.0124016	-0.00971917	-0.021089	-0.0574336	-0.0393651	0.0030501	-0.0161055	-0.0215651	-0.0342908	-0.0126836	-0.0186836	-0.0479141	-0.0252999	-0.00586056	0.000463503	-0.00362597	-0.0140082	0.0187341	0.0329399	-0.00375275	-0.0167958	0.00212925	-0.0263759	-0.00794661	-0.0490862	-0.0415914	-0.00194596	-0.12701	0.0351117	0.123454	0.122684	0.212558	0.0853238	0.0156859	-0.0215157	-0.054559	-0.0133848	-0.000157531	-0.0434195	-0.0515881	-0.0067681	0.0099987	-0.0537542	-0.013101	-0.0148582
*	TAA	N/A	N/A	N/A	N/A	N/A	N/A	N/A	N/A	N/A	N/A	N/A	N/A	N/A	N/A	N/A	N/A	N/A	N/A	N/A	N/A	N/A	N/A	N/A	N/A	N/A	N/A	N/A	N/A	N/A	N/A	N/A	N/A	N/A	N/A	N/A	N/A	N/A	N/A	N/A	N/A	N/A	N/A	N/A	N/A	N/A	N/A	N/A	N/A
*	TAG	N/A	N/A	N/A	N/A	N/A	N/A	N/A	N/A	N/A	N/A	N/A	N/A	N/A	N/A	N/A	N/A	N/A	N/A	N/A	N/A	N/A	N/A	N/A	N/A	N/A	N/A	N/A	N/A	N/A	N/A	N/A	N/A	N/A	N/A	N/A	N/A	N/A	N/A	N/A	N/A	N/A	N/A	N/A	N/A	N/A	N/A	N/A	N/A
C	TGC	-0.0131941	-0.0154592	-0.00100611	-0.017152	-0.0106398	-0.0322347	-0.0424576	0.00986589	-0.00175894	0.0269593	-0.0252105	-0.0341871	-0.0125246	-0.022592	-0.0120919	-0.0104601	-0.0207659	-0.00699252	-0.0164853	-0.0214289	-0.00210793	0.00281243	-0.0262676	-0.0186847	-0.0183812	-0.00959452	0.000659495	-0.0422411	-0.00907776	-0.00738763	-0.0421794	-0.00549985	0.13472	0.13477	0.19951	0.0786957	0.000565715	-0.0129927	-0.0369994	-0.00205214	-0.00757217	-0.0138629	0.00588166	-0.0116817	-0.00955655	-0.0262558	-0.0206055	-0.0240206
C	TGT	-0.0262555	-0.0229336	-0.00841064	0.00446571	-0.0229699	0.0193692	-0.0151834	-0.00596163	0.00845103	-0.0196577	-0.0481347	-0.00839388	-0.0165758	-0.0326974	-0.00726089	-0.00315595	0.00351549	-0.0234034	-0.0304517	-0.00592523	-0.0391092	-0.000105899	-0.0469143	-0.0151051	0.00399615	-0.0379017	-0.0532247	-0.0365907	0.0107837	-0.00118154	-0.0240888	-0.0227751	0.0961147	0.113702	0.27161	0.0521997	0.00265737	-0.0132723	-0.0160854	0.00676027	-0.00950386	-0.00446919	0.0358623	-0.0454414	-0.0311403	-0.0167462	-0.0399181	-0.0208972
*	TGA	N/A	N/A	N/A	N/A	N/A	N/A	N/A	N/A	N/A	N/A	N/A	N/A	N/A	N/A	N/A	N/A	N/A	N/A	N/A	N/A	N/A	N/A	N/A	N/A	N/A	N/A	N/A	N/A	N/A	N/A	N/A	N/A	N/A	N/A	N/A	N/A	N/A	N/A	N/A	N/A	N/A	N/A	N/A	N/A	N/A	N/A	N/A	N/A
W	TGG	-0.0177913	-0.00159426	-0.0174212	-0.0138072	-0.0157664	-0.00222569	-0.0310273	-0.0136515	-0.022888	-0.00738073	-0.0190976	-0.024408	-0.0113934	-0.0168824	-0.00354891	0.00413106	0.00266546	-0.0166899	-0.011461	-0.00686605	0.00566982	0.000539412	-0.0164736	-0.0185838	-0.00229804	-0.0213027	-0.0362854	-0.0255698	-0.0156681	-0.0178998	-0.0345636	-0.0163154	0.125198	0.138677	0.240898	0.11597	-0.0319331	-0.0174556	-0.109676	-0.0251641	-0.0334459	-0.00471841	-0.0624954	-0.0333874	-0.00720487	-0.0312955	-0.070111	-0.0222486
T	ACC	-0.0110454	-0.00336207	0.00497868	-0.00223266	0.000905242	-0.0372712	-0.0574773	-0.00360513	0.00985647	-0.0155815	-0.0146077	-0.0126074	-0.00666878	-0.0122497	-0.0245283	-0.0112945	0.0149993	-0.0233297	-0.0185326	-0.00849221	-0.00755587	0.0190023	0.0200173	-0.0157877	-0.00041773	-0.0204434	-0.178034	-0.0769282	-0.00179956	-0.0145689	-0.0996339	-0.0202498	-0.00241997	0.0479168	0.0846483	-0.00403082	0.0022898	-0.0139922	-0.0377991	-0.013117	-0.00555308	-0.0131455	-0.0300211	-0.0189084	-0.0198518	-0.0537516	-0.05336	-0.0307102
T	ACT	-0.0151928	0.00774743	-0.00486825	-0.0259875	-0.0217844	-0.0395466	-0.0416306	-0.0496357	-0.00359859	-0.0135128	-0.0312051	-0.00367313	-0.00301425	-0.00366256	-0.022889	-0.0193384	-0.0226435	-0.0274905	-0.0290788	-0.0133224	0.013671	-0.014537	-0.0192865	0.00341668	0.0160205	-0.0317755	-0.191998	-0.101974	0.00531539	-0.0253838	-0.17771	-0.00942834	0.0237735	0.0201493	0.0553718	1.74438e-05	-0.00190268	-0.040168	-0.039492	-0.064355	-0.00647976	-0.0824381	-0.0357529	-0.0575934	0.0175602	-0.0485454	-0.0479093	-0.0335312
T	ACA	-0.00625453	-0.00448274	-0.0117115	-0.00536059	-0.010357	-0.00511746	-0.0718549	-0.0172765	-0.000420685	0.00467345	0.0243033	0.00711501	0.0191113	-0.0107975	-0.00649109	-0.00132388	-0.0141378	0.0108519	-0.036607	0.00107296	-0.00568749	0.0148656	0.0104521	-0.018762	0.00526117	-0.00493325	-0.265032	-0.151813	-0.0109191	-0.0339742	-0.205274	-0.00999585	0.0251042	0.0151419	-0.0224895	-0.0194457	0.00888299	-0.00983318	-0.00128166	-0.0206188	0.00182231	-0.0262527	-0.0178631	-0.0302582	0.0100998	-0.0541659	-0.0893429	-0.0177551
T	ACG	-0.00501751	-0.00789192	-0.0172607	-0.0144715	-0.0231985	0.0118076	-0.0342597	0.0246233	0.0125673	0.0123857	-0.00579003	-0.00296456	-0.0117054	-0.00379946	-0.0176063	-0.0117755	-0.00932853	-0.00923651	0.00499839	-0.016079	0.00234703	-0.0227866	-0.019744	-0.0159367	-0.0330776	-0.0250778	-0.188961	-0.144895	-0.00466323	-0.000803606	-0.15426	-0.00974922	0.0523553	0.081227	0.162815	0.0265077	-0.0171952	0.00424018	-0.0463665	0.012383	0.0140472	-0.0229894	-0.0308239	-0.0310485	-0.00655658	-0.0489719	-0.053362	-0.0224911
I	ATC	-0.0198989	-0.0124936	-0.00294826	-0.0267519	-0.0107166	-0.0506243	-0.0662129	-0.0290815	-0.0125625	0.00403795	-0.0243735	-0.00758382	-6.50783e-05	-0.00775847	-0.0254511	-0.00986389	-0.0191563	-0.026062	-0.0467815	-0.0285737	0.00140229	-0.0297497	-0.0308099	-0.0452793	0.0022603	-0.0222516	-0.0453403	-0.039408	-0.00383803	-0.00891712	0.0167737	-0.0160504	0.195788	0.197135	0.436012	0.128605	-0.00855885	0.00401777	-0.0447105	-0.012171	-0.00571459	-0.0290172	-0.0319115	-0.0505565	0.0063158	0.0305858	-0.0694994	-0.0561125
I	ATT	-0.014733	-0.0186548	0.00863726	-0.0337934	-0.0144967	-0.0431276	-0.0398976	-0.0420794	-0.0384334	-0.0012761	-0.0157734	-0.00697132	-0.000180408	-0.0190205	-0.0077069	-0.00429071	-0.0156969	0.00980584	0.0107467	-0.0301137	-0.00288708	-0.00775593	-0.0219794	-0.000588892	0.00388605	-0.0453947	-0.0678057	-0.032637	-0.0223444	0.0132467	-0.0119325	-0.0327604	0.180182	0.238392	0.390042	0.151563	-0.0137801	0.0292622	-0.0855256	-0.00849158	-0.0100782	-0.0329401	-0.0235437	-0.0156322	0.00543046	-0.0435875	-0.0283119	-0.0121834
I	ATA	-0.00523229	-0.0220359	-0.0141926	-0.00468716	-0.0060164	-0.020076	-0.0816083	-0.024954	-0.00999299	-0.0296891	-0.0146233	0.00202656	-0.0125791	-0.0102765	0.010504	-0.00747433	0.0338068	-0.0301661	-0.017341	-0.0248878	-0.0201801	-0.0207163	-0.0116122	-0.0215105	-0.0040695	-0.0527115	-0.0211029	0.0002529	0.00813701	-0.00750264	0.0403707	0.00774298	0.271146	0.269619	0.382687	0.215671	-0.0153563	-0.00996237	-0.034473	-0.0277559	-0.0253229	-0.0286162	-0.0275001	-0.0353197	-0.0283277	-0.10904	-0.0309842	-0.0257713
M	ATG	-0.028183	-0.0235481	0.0123444	0.00170692	-0.0192812	-0.0204391	-0.0366377	0.0154949	-0.0139669	-0.0168156	-0.0289354	-0.00751054	0.00327727	-0.0044644	-0.0117749	-0.0166021	-0.0271336	-0.00581136	-0.00843575	-0.00538114	0.00311642	0.0287787	-0.0535438	-0.0191342	-0.0655134	-0.0350356	-0.0111727	-0.0155161	0.00704173	-0.00885819	-0.0167298	-0.0170734	0.195047	0.252812	0.323765	0.204216	0.0144453	0.00188236	-0.0158101	-0.000645822	-0.042409	-0.0501085	0.00209483	-0.0442061	-0.00180482	0.000729284	-0.0270461	-0.0578869
N	AAC	-0.00498055	-0.0114074	-0.00478246	-0.00717006	-0.00833231	-0.0511959	-0.0375731	0.014123	-0.0178384	-0.0129359	-0.0223508	-0.00380445	-0.0154857	-0.0387696	-0.0262105	-0.0289272	-0.00813528	-0.0209231	-0.0089929	-0.0089572	-0.0135093	-0.0270595	-0.0261947	0.0582102	-0.0304184	-0.0399578	0.000578358	-0.0389468	-0.0047082	-0.0228775	-0.0108475	-0.0123747	0.139009	0.142085	0.210814	0.115021	-0.00502162	9.79391e-05	-0.0476002	-0.00720121	-0.020605	-0.051729	-0.0178711	-0.0205519	-0.0125698	-0.0189469	-0.0305481	-0.0145757
N	AAT	-0.0231936	-0.000554609	-0.000654288	-0.0176192	-0.00301852	-0.0113348	-0.046227	-0.000322429	-0.0163877	0.00160028	-0.023815	-0.0254845	-0.0103073	-0.010773	-0.0388306	-0.0175128	-0.0212973	0.00215933	-0.0368662	-0.029352	-0.0428262	-0.00782594	-0.0423725	-0.0192169	-0.048316	-0.000318504	-0.00616299	0.00210843	-0.00296646	0.00449986	-0.0294764	-0.000794716	0.0669683	0.127497	0.270215	0.138573	-0.0156754	0.0120595	-0.0403424	-0.0200751	0.00656851	-0.0392478	-0.0157251	-0.0192756	-0.013498	-0.00116036	-0.016235	-0.0138513
K	AAA	0.000205246	-0.040695	-0.0134114	-0.000454637	-0.00981251	0.00774571	-0.0626967	0.0263556	-0.0253988	-0.00918722	-0.0237284	-0.0212878	0.00282222	0.00763972	-0.00763497	0.000186597	-0.0134393	-0.0223244	0.00369297	-0.0281727	-0.000175509	0.0275516	-0.0311093	-0.0396542	-0.0135125	-0.0174118	-0.036355	-0.0632676	-0.0302976	-0.0200941	0.000730616	-0.00913733	0.166672	0.168172	0.2342	0.121703	0.00333713	0.0297761	-0.0381917	-0.0370339	-0.0650605	-0.0375491	-0.0186093	-0.0362652	-0.0172752	-0.0198358	-0.0264168	-0.0334772
K	AAG	-0.0180846	-0.0190721	-0.00991399	-0.0155379	0.0039041	-0.0376552	-0.0440422	-0.0089133	-0.0344499	-0.0156902	-0.0215149	-0.0226204	-0.00886899	-0.015264	-0.0314139	-0.0333071	0.00100848	-0.0204517	-0.0341352	-0.0134237	-0.0387501	0.0133905	-0.0173001	-0.016791	0.00737021	-0.0569922	-0.0453629	0.00745378	0.0220888	-0.0586194	-0.00707786	-0.01688	0.162775	0.202993	0.252328	0.0745325	-0.000245845	-0.0425986	-0.0276299	0.0137101	-0.0143719	-0.0274026	-0.036477	-0.0184423	-0.0100488	-0.0162964	-0.0355785	-0.0352745
S	AGC	-0.00698573	-0.00757419	-0.0091779	-0.00842879	-0.00956649	-0.0169577	-0.0543579	-0.00602159	-0.0222159	-0.0272496	-0.00933861	-0.0206214	-0.0181276	-0.0142524	-0.0162155	-0.019596	-0.00739429	0.00979872	0.0071464	-0.010095	-0.0266786	0.00830854	-0.048325	-0.0350869	0.00608726	-0.0168058	-0.0299065	-0.0630094	-0.0150233	-0.0167465	-0.00681548	-0.021779	0.128558	0.0889331	0.235702	0.0993477	-0.0251262	-0.0556784	-0.00420058	-0.0213897	-0.0207522	0.00223846	-0.015786	-0.0170997	0.00200586	-0.0628526	-0.0295182	-0.0256426
S	AGT	-0.0223024	-0.0126475	-0.00927897	-0.00219469	-0.0323889	0.000866554	-0.0262865	-0.0395296	-0.0235761	-0.00852612	-0.0250729	-0.00651084	-0.00995997	-0.0110132	-0.0169994	0.00202076	-0.00754108	0.00758553	-0.019159	-0.00523651	0.0179039	0.0120344	0.00327426	-0.00299844	-0.0245732	-0.00364935	0.00509767	0.0275463	0.0025445	0.0239306	-0.0532557	-0.0206495	0.0987202	0.137815	0.253807	0.125933	-0.0101489	-0.0147116	-0.00332881	0.0112107	-0.0330431	-0.025832	0.0163624	-0.033365	-0.0270494	0.0121202	-0.0105845	-0.0162464
R	AGA	-0.0127968	-0.00824761	-0.0324223	-4.08375e-05	-0.00656042	0.00157862	-0.0175809	-0.0193038	-0.0261976	-0.00951423	-0.0167641	-0.0127873	-0.00671184	-0.0133598	-0.0136346	-0.0165601	-0.0293818	-0.0248295	-0.00752567	-0.0184542	-0.00893104	-0.0296648	-0.0343447	-0.000372892	0.000388576	-0.0286673	0.0166674	-0.0178455	-0.0141677	0.00615819	-0.0823492	0.0251854	0.15578	0.216356	0.32765	0.162073	-0.0338103	-0.0186936	-0.0232852	-0.0332982	-0.0320691	-0.029815	-0.0178273	-0.0454388	-0.016356	-0.02628	-0.0193609	-0.0203625
R	AGG	-0.015877	-0.0222073	-0.0282453	-0.0299229	-0.020678	-0.0427992	-0.089192	-0.0181216	-0.0262276	-0.00483506	-0.000635288	-0.0049659	0.00681521	0.00291417	-0.00545223	-0.00961229	-0.0129409	-0.00610393	-0.00252915	0.00991805	-0.0140827	-0.0122557	-0.0322057	0.00202226	-0.0061844	-0.00278698	-0.0664445	-0.00447552	-0.00411025	-0.017938	-0.0113974	-0.0211634	0.134069	0.257821	0.344903	0.12431	-0.0132561	-0.0189568	-0.0289495	-0.0116987	-0.0289075	-0.017958	-0.0628949	-0.013098	-0.0424269	-0.0058982	-0.0464188	-0.0118814
A	GCC	-0.00796245	-0.0083898	-0.000509237	-0.0123254	-0.00789141	-0.0369174	-0.0466971	-0.0136587	-0.00800094	-0.016092	0.000976246	-0.00346226	-0.00958183	-0.0157566	-0.00363383	-0.00838603	-0.00908865	-0.0312526	-0.010039	-0.00781822	0.00356753	-0.0133005	-0.0222008	-0.00554598	-0.000105987	-0.0275917	-0.0631953	-0.0122937	-0.0183567	-0.0281924	-0.0292969	-0.00933678	0.0986116	0.103625	0.153464	0.0717811	-0.0086274	-0.0082454	-0.000514917	-0.00514092	0.00247237	0.00296498	-0.000607266	-0.0251192	-0.0182386	-0.0103658	-0.0287168	-0.0286512
A	GCT	-0.0125692	-0.0170077	-0.0164504	-0.0122959	-0.0248394	-0.0190361	-0.063569	-0.00787786	-0.0121171	-0.0040619	-0.0155674	-0.0184695	-0.0120419	-0.00810131	-0.0144872	-0.015042	-0.00919334	-0.0271548	-0.0127674	-0.00192638	0.0061897	-0.0363619	-0.00844515	-0.0118683	-0.0260127	-0.0197847	-0.0470536	-0.0546349	-0.026741	-0.0105382	-0.0276515	-0.0126786	0.0970211	0.0977498	0.148133	0.07568	0.0175845	-0.0235581	-0.0229626	-0.0142817	-0.0248385	-0.00398273	0.00844964	0.00422159	-0.00622888	-0.0194979	0.00725151	-0.0265359
A	GCA	-0.00486687	-0.0113899	-0.016352	-0.00628307	-0.00606004	-0.00916583	-0.0275662	-0.0202046	0.00820147	-0.0335789	0.00918722	-0.0207618	-0.0117561	-0.00161147	-0.013114	-0.0121409	-0.00321836	-0.00269044	-0.0217845	-0.0157099	-0.0204701	-0.0200024	-0.0449098	-0.00813171	-0.00893736	-0.0187949	-0.088052	0.00306954	-0.0100608	0.0118396	-0.055964	-0.026778	0.128515	0.152543	0.249162	0.139787	-0.01973	0.000639994	-0.00280694	-0.0104289	-0.00992333	-0.0224455	-0.0115994	-0.0287204	-0.0160787	-0.0204576	-0.044315	-0.0194318
A	GCG	-0.009136	-0.00456583	-0.00842035	-0.0101868	-0.0200947	-0.0128905	-0.0462263	-0.0155224	-0.0099858	-0.00742897	-0.0239035	-0.0237965	-0.00057278	0.00908071	-0.00625265	-0.0102126	-0.00221639	0.00292914	-0.0138411	-0.0176786	-0.0124836	-0.00181678	-0.0365964	-0.018554	-0.00833775	-0.00721171	-0.12121	-0.0482783	-0.0169019	-0.0357157	-0.0440989	-0.00839227	0.121109	0.155527	0.176023	0.0948425	0.000413478	-0.0120744	-0.0181303	-0.0160415	0.00497713	0.00639809	-0.064632	-0.0166851	-0.00466281	-0.0286991	-0.0489658	-0.0166756
V	GTC	-0.00911654	-0.00845782	-0.00788973	-0.00783208	-0.0155958	-0.0310541	-0.032888	-0.0116042	-0.0101501	-0.0333192	-0.0223568	-0.0119003	-0.0137595	-0.0235759	-0.0097516	-0.00644669	0.000933049	-0.0142301	-0.0205535	-0.0263689	-0.00120142	-0.0358394	-0.0199319	0.0129176	-0.0146906	-0.0327471	-0.108004	-0.0338982	-0.0137839	-0.0157236	-0.00497111	-0.0132862	0.141346	0.160149	0.2203	0.128688	-0.0168452	0.00380867	-0.0227577	-0.0266152	-0.0283803	0.00381595	-0.0493905	-0.021902	-0.030919	-0.00501865	-0.0154139	-0.0367406
V	GTT	0.00184674	-0.00129097	-0.0177748	0.0065061	-0.0119302	-0.0218562	-0.00642179	-0.0292642	-0.0176642	-0.02609	-0.0143228	-0.00922365	-0.00850913	0.00363833	-0.0386119	-0.0084744	-0.0126974	0.0129639	-0.0122126	-0.00638683	-0.01919	-0.00880683	0.00077637	-0.00203074	-0.006482	0.00143301	0.00699144	-0.0419807	-0.00914909	-0.00350537	-0.0405789	0.0220633	0.156585	0.200681	0.26572	0.124289	-0.0273881	-0.0313602	0.000876549	-0.0340279	-0.00750632	0.0850333	-0.0494353	-0.0127318	-0.00785485	-0.0398453	-0.0368231	-0.0289313
V	GTA	-0.00908689	-0.00679672	0.00190468	-0.0277921	0.00303795	-0.058197	-0.0427035	-0.00744771	-0.00155511	-0.0188029	-0.025239	-0.00372437	-0.000676818	-0.0303439	-0.00613902	-0.00959643	0.00594351	-0.0130012	-0.0135541	-0.0252976	0.00603772	0.0163857	0.0290371	-0.0147406	-0.00610143	-0.0105465	0.0059644	-0.00954163	-0.00757541	0.00890734	-0.0279877	-0.0199935	0.141077	0.259287	0.400865	0.151521	-0.0137853	-0.0597066	-0.0287463	-0.0287077	0.0154683	-0.0660467	-0.0156272	-0.0428565	-0.00876135	-0.0224081	-0.00793837	-0.0227089
V	GTG	-0.00771088	-0.018963	-0.0299713	-0.00666317	-0.00341315	-0.0274558	-0.0279084	-0.0255154	-0.0182882	-0.00575808	0.024815	-0.0208323	-0.000253709	-0.000727205	-0.0188797	-0.0183132	-0.0191357	-0.0348388	-0.0068693	0.00655018	-0.00516163	-0.00471633	0.0165591	-0.0085709	-0.047664	-0.0348049	-0.0586691	-0.0137602	-0.0192428	-0.0354074	-0.0183426	-0.00968469	0.108465	0.182569	0.262611	0.142056	-0.011444	-0.0306984	-0.000884211	-0.0106571	-0.0216206	-0.00662653	0.0434857	-0.0311726	-0.0328007	-0.0184014	-0.038823	-0.0301783
D	GAC	-0.00497295	0.00741639	0.00439144	-0.0112771	-0.0182999	-0.013013	-0.0228984	-0.0116531	0.00380096	-0.0152092	-0.00733536	0.000564673	-0.00794211	-0.00525475	-0.01325	-0.00811009	-0.0114477	-0.0323917	-0.0204811	-0.0341382	-0.00675314	-0.0262168	-0.0287191	-0.015473	-0.0033176	-0.0553828	-0.028084	-0.00798107	-0.00263618	-0.0136493	0.00960208	-0.0110828	0.129165	0.168772	0.216465	0.0926689	0.000971442	0.00502058	-0.0642053	-0.00525343	-0.00245188	0.000154483	-0.0432766	-0.0459158	-0.0161821	-0.0202318	-0.0316223	-0.0222743
D	GAT	-0.00824983	-0.000114535	-0.00775627	-0.000552963	-0.0111116	-0.01484	-0.0189784	-0.0167018	-0.0234344	-0.0225702	-0.0226354	-0.000674782	0.00244665	0.0137478	-0.0272844	-0.0153639	-0.00167444	-0.0169738	0.0140184	-0.0381107	-0.0293927	0.010622	-0.0673583	-7.78725e-05	0.0146012	0.0048459	0.0316106	-0.0206563	0.00822828	0.0479435	0.0756801	-0.013075	0.132272	0.159627	0.206929	0.111137	-0.00638009	-0.0296799	0.0177318	0.0115544	-0.0147252	-0.0367694	-0.0682816	-0.0381463	0.0214163	0.0138344	0.0105471	-0.0219643
E	GAA	-0.0108212	-0.0145877	-0.0137631	0.0052169	-0.013582	0.0204182	-0.0620748	-0.00124515	0.00563213	-0.00199358	-0.0242703	-0.01156	0.000633404	-0.0142308	-0.0187625	-0.00193238	-0.00145599	0.0136495	-0.00648243	-0.0143587	-0.0292944	-0.0581778	-0.0569601	-0.020029	-0.0182939	-0.0178669	-0.00153706	-0.030957	0.013562	-0.00708973	-0.0140815	-0.0241049	0.123843	0.174186	0.27849	0.133186	-0.0079237	-0.0219521	0.027343	0.0116802	-0.0306399	-0.0250428	-0.0239315	-0.0346504	-0.0234407	0.0223668	-0.0534307	-0.0184365
E	GAG	-0.00118087	-0.0157355	-0.00353511	0.0154145	-0.0101942	0.0122871	0.00960088	-0.0102972	-0.0200766	0.0300295	-0.00354399	-0.0301078	-0.000451519	-0.0331011	0.00998066	-0.0127907	-0.0187102	-0.0200676	-0.0432099	-0.0395663	-0.0252546	0.011403	-0.0292697	0.0103767	-0.0278366	-0.027598	-0.00538564	0.00146015	-0.0198937	-0.00199226	-0.0655566	-0.000806105	0.126678	0.0871775	0.187027	0.141055	-0.0075978	-0.0698269	-0.00448012	-0.0337702	0.00359447	-0.0066345	-0.0358944	0.00133274	-0.0131504	-0.0434459	0.00956347	-0.0214615
G	GGC	-0.0121924	-0.0148669	-0.00967665	-0.00907988	-0.017148	-0.0225195	-0.0338813	-0.0157543	-0.0154353	-0.0153913	-0.00728627	-0.00809473	-0.00828458	-0.0120531	-0.0182035	-0.00333528	-0.00998901	-0.0188563	-0.0101148	-0.00704065	0.00131281	-0.0387632	-0.0451865	-0.0169929	-0.00931905	0.0187499	-0.0242825	-0.0754852	-0.00957585	-0.00370522	-0.0552448	-0.00279258	0.0830613	0.102785	0.128831	0.0739911	-0.0151503	-0.0216408	-0.0160471	-0.0180059	-0.0058167	-0.0290028	0.00705146	-0.0222114	0.000839099	-0.0248931	-0.0353404	0.00498579
G	GGT	-0.0135579	-0.000541047	0.00500229	-0.0144167	-0.0145223	-0.0175877	-0.0754266	-0.0103176	-0.0147297	-0.0068815	-0.023226	-0.00398567	-0.0131649	-0.00665462	-0.00144591	-0.00736329	-0.0223869	-0.0119765	-0.0130866	0.00777522	0.0110877	-0.00683824	-0.00303715	-0.0184275	-0.0139448	-0.00648874	-0.0409287	0.000215423	-0.00460258	0.010998	0.0153282	-0.0211976	0.106441	0.182716	0.137977	0.0893481	-0.00882642	-0.0116579	-0.00608062	-0.0141221	-0.0188927	-0.0303911	-0.0470822	-0.00711889	-0.000648128	0.0298541	-0.0116878	-0.00522394
G	GGA	-0.0162665	-0.0257818	-0.011881	-0.00561759	-0.00768234	-0.0246337	-0.0325897	-0.0303905	-0.00705618	0.0103628	-0.0633372	-0.00144644	-0.0132928	-0.0365535	-0.00616886	0.00272582	-0.0104779	-0.0201734	-0.0121065	-0.0117605	-0.000905352	0.0211653	-0.063761	-0.0170578	-0.00742908	-0.0485295	0.01334	-0.0225822	-0.0239876	-0.0210653	-0.0073548	-0.0115509	0.117668	0.129975	0.218406	0.101922	-0.0352394	0.0116339	-0.0374127	-0.0215228	0.0108972	-0.00788689	-0.0230458	-0.0471027	-0.00552516	-0.0370284	-0.0234871	-0.0458168
G	GGG	-0.00425802	-0.00931257	-0.0120097	-0.00145662	-0.0096582	-0.014966	-0.0394516	-0.0120153	-0.0065357	-0.0165742	-0.0110983	-0.00956259	0.0014127	-0.0193317	-0.00353934	0.00455051	-0.00520603	0.00231125	0.000603947	-0.00617322	-0.00409344	-0.014494	-0.0144146	-0.00555256	-0.00723966	-0.0182976	-0.00838342	-0.0512108	-0.0284448	-0.00376598	-0.00286742	-0.00755356	0.0853772	0.0894926	0.14061	0.0443663	-0.0218721	-0.0181059	-0.000814075	-0.0143109	0.00858882	0.0135656	0.00662966	-0.0164534	-0.0246073	-0.0451347	0.0108632	-0.00389956
[truncated: 214 more columns]

## Sheet: P-value for 2D codon heatmap
P-values for shuffled datasets exceeding experimental data of 2-dimensional representation of stalling propensities with the corresponding codons located in the P- and A-sites
P\A		Codons located in the A-site
		CCC	CCT	CCA	CCG	CTC	CTT	CTA	CTG	CAC	CAT	CAA	CAG	CGC	CGT	CGA	CGG	TCC	TCT	TCA	TCG	TTC	TTT	TTA	TTG	TAC	TAT	TAA	TAG	TGC	TGT	TGA	TGG	ACC	ACT	ACA	ACG	ATC	ATT	ATA	ATG	AAC	AAT	AAA	AAG	AGC	AGT	AGA	AGG
P	CCC	1	1	1	1	0.916168	0.992016	1	0.917166	0.992016	0.933134	0.897206	0.996008	0.931138	0.994012	0.986028	0.94012	0.999002	0.93014	0.851297	0.789421	0.640719	0.439122	0.775449	0.999002	0.290419	0.967066	1	1	0.999002	0.98503	1	0.989022	0	0	0	0	0.938124	0.839321	0.97006	0.699601	0.907186	0.974052	0.636727	0.868263	0.851297	0.767465	0.963074	0.999002
P	CCT	1	0.987026	0.948104	0.974052	0.0988024	0.897206	1	0.505988	0.832335	0.128743	0.4002	0.997006	0.426148	0.743513	0.944112	0.845309	0.979042	0.941118	0.720559	0.636727	0.93513	0.686627	0.837325	0.316367	0.983034	0.902196	0.438124	1	0.994012	0.873253	0.992016	0.97006	0	0	0	0	0.775449	0.737525	0.843313	0.43014	0.948104	0.712575	0.921158	0.967066	0.979042	0.997006	0.498004	0.991018
P	CCA	1	0.896208	0.998004	1	0.261477	0.966068	0.999002	0.946108	0.629741	0.914172	0.830339	0.974052	0.993014	0.977046	0.944112	0.997006	0.879242	0.378244	0.906188	0.785429	0.284431	0.288423	0.605788	0.770459	0.956088	0.994012	0.999002	0.964072	0.93513	0.964072	0.998004	0.463074	0	0	0	0	0.698603	0.864271	0.815369	0.664671	0.936128	0.98004	0.862275	0.947106	0.954092	0.929142	0.922156	1
P	CCG	1	0.992016	0.996008	1	0.999002	0.992016	1	0.382236	1	0.813373	0.634731	0.998004	0.939122	0.813373	1	0.97505	0.952096	0.673653	0.615768	0.865269	0.866267	0.209581	0.791417	0.982036	0.810379	0.934132	0.997006	1	0.99501	0.983034	0.620758	0.92515	0	0	0	0	0.693613	0.62475	0.976048	0.235529	0.98503	0.99501	0.917166	1	0.9501	0.981038	0.99002	1
L	CTC	0.888224	0.953094	0.587824	0.664671	0.756487	0.775449	0.93014	0.696607	0.721557	0.956088	0.228543	0.941118	0.937126	0.44511	0.849301	0.710579	0.798403	0.608782	0.966068	0.831337	0.853293	0.660679	0.748503	0.968064	0.656687	0.854291	0.781437	0.976048	0.777445	0.859281	0.711577	0.536926	0	0	0	0	0.611776	0.810379	0.847305	0.891218	0.874251	0.868263	0.615768	0.374251	0.894212	0.983034	1	0.873253
L	CTT	0.992016	0.466068	0.172655	0.247505	0.844311	0.800399	1	0.962076	0.324351	0.888224	0.887226	0.94511	0.973054	0.374251	0.961078	0.677645	0.605788	0.322355	0.959082	0.834331	0.752495	0.684631	0.92016	0.429142	0.446108	0.810379	0.982036	0.994012	0.165669	0.98004	0.274451	0.745509	0	0	0	0	0.686627	0.213573	0.446108	0.843313	0.215569	0.846307	0.484032	0.94012	0.864271	0.702595	0.999002	0.96507
L	CTA	0.729541	0.672655	0.688623	0.649701	0.633733	0.884232	0.58982	0.763473	0.886228	0.881238	0.706587	0.179641	0.979042	0.989022	0.759481	0.850299	0.365269	0.38523	0.301397	0.986028	0.886228	0.800399	0.573852	0.832335	0.794411	0.165669	0.409182	0.317365	0.576846	0.507984	0.99501	0.492016	0	0	0	0	0.442116	0.993014	0.702595	0.176647	0.877246	0.923154	0.488024	0.981038	0.459082	0.991018	0.99501	0.676647
L	CTG	0.748503	0.493014	0.727545	0.160679	0.52495	0.758483	0.992016	0.151697	0.577844	0.851297	0.315369	0.864271	0.642715	0.736527	0.638723	0.914172	0.520958	0.694611	0.666667	0.265469	0.703593	0.600798	0.799401	0.882236	0.991018	0.716567	0.951098	0.839321	0.862275	0.488024	0.610778	0.242515	0	0	0	0	0.812375	0.0968064	0.991018	0.590818	0.354291	0.774451	0.888224	0.978044	0.740519	0.986028	0.979042	1
H	CAC	0.91018	0.720559	0.57485	0.865269	0.565868	0.656687	0.884232	0.860279	0.873253	0.362275	0.717565	0.59481	0.0708583	0.703593	0.41517	0.973054	0.492016	0.97006	0.567864	0.773453	0.600798	0.448104	0.703593	0.801397	0.658683	0.728543	0.510978	0.571856	0.876248	0.625749	0.434132	0.438124	0	0	0	0	0.860279	0.766467	0.444112	0.812375	0.582834	0.836327	0.744511	0.804391	0.756487	0.374251	0.55988	0.941118
H	CAT	0.973054	0.727545	0.264471	0.738523	0.776447	0.408184	0.972056	0.434132	0.373253	0.588822	0.854291	0.824351	0.958084	0.713573	0.98503	0.239521	0.394212	0.899202	0.828343	0.442116	0.869261	0.61477	0.786427	0.53992	0.799401	0.972056	0.674651	0.95509	0.638723	0.542914	0.621756	0.874251	0	0	0	0.0159681	0.891218	0.394212	0.948104	0.760479	0.536926	0.881238	0.919162	0.497006	0.586826	1	0.742515	0.728543
Q	CAA	0.322355	0.442116	0.765469	0.834331	0.863273	0.953094	0.884232	0.656687	0.472056	0.266467	0.741517	0.946108	0.329341	0.552894	0.590818	0.122754	0.331337	0.701597	0.818363	0.667665	0.267465	0.401198	0.40519	0.976048	0.806387	0.551896	0.716567	0.118762	0.669661	0.237525	0.501996	0.826347	0	0	0	0	0.525948	0.834331	0.860279	0.523952	0.172655	0.917166	0.782435	0.689621	0.834331	0.298403	0.563872	0.918164
Q	CAG	0.879242	0.830339	0.210579	0.523952	0.488024	0.788423	0.997006	0.592814	0.448104	0.849301	0.798403	0.713573	0.279441	0.587824	0.99501	0.88024	0.229541	0.847305	0.478044	0.850299	0.810379	0.807385	0.992016	0.38523	0.881238	0.796407	0.456088	0.928144	0.630739	0.5998	0.938124	0.163673	0	0	0	0	0.724551	0.92515	0.739521	0.691617	0.852295	0.826347	0.391218	0.968064	0.978044	0.311377	0.364271	0.944112
R	CGC	0.354291	0.904192	0.916168	0.644711	0.499002	0.449102	0.986028	0.856287	0.954092	0.798403	0.668663	0.778443	0.829341	0.903194	0.714571	0.759481	0.52994	0.472056	0.929142	0.62475	0.530938	0.51497	0.821357	0.796407	0.944112	0.999002	0.545908	0.507984	0.809381	0.991018	0.249501	0.164671	0	0	0	0	0.807385	0.886228	0.655689	0.969062	0.852295	0.573852	0.938124	0.447106	0.620758	1	0.916168	0.703593
R	CGT	0.966068	0.40519	0.521956	0.819361	0.799401	0.417166	0.883234	0.46507	0.884232	0.96507	0.361277	0.680639	0.269461	0.464072	0.986028	0.961078	0.835329	0.754491	0.809381	0.602794	0.914172	0.347305	0.757485	0.967066	0.773453	0.545908	0.959082	0.220559	0.255489	0.494012	0.401198	0.613772	0	0	0	0	0.531936	0.190619	0.778443	0.991018	0.662675	0.993014	0.434132	0.986028	0.934132	0.656687	0.922156	1
R	CGA	0.685629	0.642715	0.649701	0.856287	0.963074	0.967066	1	0.971058	0.672655	0.222555	0.848303	0.997006	0.266467	0.968064	0.989022	0.454092	0.870259	0.95509	0.906188	0.713573	0.234531	0.916168	0.981038	0.812375	0.772455	0.964072	0.367265	0.767465	0.946108	0.95509	0.845309	0.889222	0	0	0	0	0.366267	0.97006	0.536926	0.836327	0.94511	1	0.749501	0.996008	0.391218	0.986028	0.984032	0.414172
R	CGG	0.277445	0.882236	0.384232	0.431138	0.702595	0.998004	0.991018	0.713573	0.38523	0.755489	0.561876	0.977046	0.673653	0.215569	0.816367	0.373253	0.751497	0.342315	0.144711	0.756487	0.434132	0.864271	0.831337	0.658683	0.877246	0.555888	0.998004	1	0.844311	0.932136	0.994012	0.710579	0	0	0	0	0.894212	0.658683	0.769461	0.374251	0.867265	0.999002	0.952096	0.0718563	0.849301	0.989022	0.982036	0.463074
S	TCC	0.362275	0.330339	0.45509	0.952096	0.438124	0.196607	0.992016	0.603792	0.672655	0.471058	0.839321	0.432136	0.912176	0.219561	0.959082	0.808383	0.449102	0.631737	0.726547	0.753493	0.893214	0.728543	0.829341	0.673653	0.58483	0.183633	0.718563	0.967066	0.387226	0.893214	0.931138	0.695609	0	0	0	0	0.149701	0.936128	0.894212	0.849301	0.620758	0.90519	0.964072	0.782435	0.674651	0.913174	0.88024	0.988024
S	TCT	0.645709	0.49501	0.883234	0.42515	0.88024	0.662675	0.370259	0.788423	0.399202	0.332335	0.944112	0.660679	0.750499	0.622754	0.682635	0.694611	0.676647	0.578842	0.726547	0.644711	0.235529	0.50499	0.837325	0.413174	0.683633	0.428144	0.204591	0.855289	0.521956	0.412176	0.566866	0.333333	0	0	0	0	0.823353	0.708583	0.759481	0.403194	0.302395	0.99002	0.745509	0.58982	0.826347	0.89521	0.416168	0.821357
S	TCA	0.796407	0.877246	0.153693	0.941118	0.839321	0.717565	0.997006	0.666667	0.0928144	0.859281	0.326347	0.466068	0.0379242	0.670659	0.982036	0.575848	0.723553	0.768463	0.877246	0.991018	0.858283	0.374251	0.761477	0.839321	0.712575	0.622754	0.941118	0.914172	0.394212	0.626747	0.229541	0.268463	0	0	0	0	0.653693	0.90519	0.961078	0.478044	0.600798	0.300399	0.468064	0.87525	0.97505	0.357285	0.958084	0.978044
S	TCG	0.291417	0.241517	0.521956	0.934132	0.784431	0.615768	0.942116	0.896208	0.733533	0.482036	0.911178	0.96507	0.308383	0.596806	0.971058	0.670659	0.971058	0.429142	0.426148	0.91018	0.258483	0.363273	0.432136	0.99501	0.819361	0.709581	0.973054	0.732535	0.617764	0.866267	0.998004	0.512974	0	0	0	0	0.617764	0.982036	0.952096	0.744511	0.637725	0.993014	0.944112	0.674651	0.598802	0.627745	0.682635	0.168663
F	TTC	0.845309	0.11477	0.0528942	0.811377	0.96008	0.113772	0.989022	0.98004	0.53493	0.48503	0.596806	0.39022	0.304391	0.129741	0.983034	0.590818	0.341317	0.140719	1	0.586826	0.543912	0.639721	0.5499	0.54491	0.167665	0.226547	0.984032	0.909182	0.829341	0.655689	0.528942	0.384232	0	0	0	0	0.843313	0.322355	0.617764	0.711577	0.255489	0.728543	0.525948	0.952096	0.952096	0.788423	0.894212	0.999002
F	TTT	0.601796	0.703593	0.576846	0.483034	0.878244	0.302395	0.486028	0.728543	0.423154	0.391218	0.804391	0.682635	0.799401	0.488024	0.852295	0.927146	0.492016	0.428144	0.732535	0.765469	0.408184	0.338323	0.601796	0.148703	0.632735	0.48503	0.892216	0.635729	0.760479	0.428144	0.340319	0.429142	0	0	0	0	0.570858	0.937126	0.758483	0.510978	0.98004	0.47505	0.768463	0.177645	0.911178	0.249501	0.934132	0.919162
L	TTA	0.863273	0.91517	0.95509	0.5	0.638723	0.631737	0.903194	0.644711	0.00998004	0.712575	0.327345	0.520958	0.893214	0.528942	0.436128	0.726547	0.809381	0.463074	0.454092	0.591816	0.9002	0.651697	0.602794	0.43513	0.729541	0.969062	0.901198	0.776447	0.752495	0.478044	0.799401	0.781437	0	0	0	0	0.747505	0.259481	0.93513	0.737525	0.800399	0.824351	0.37525	0.369261	0.976048	0.958084	0.958084	0.667665
L	TTG	0.843313	0.258483	0.397206	0.926148	0.45509	0.841317	0.986028	0.576846	0.739521	0.371257	0.436128	0.691617	0.626747	0.744511	0.48503	0.719561	0.561876	0.112774	0.227545	0.764471	0.702595	0.496008	0.992016	0.573852	0.646707	0.40519	0.459082	0.0618762	0.246507	0.961078	0.266467	0.793413	0	0	0	0	0.597804	0.56986	0.568862	0.840319	0.896208	0.977046	0.96008	0.57485	0.264471	0.474052	0.956088	0.953094
Y	TAC	0.934132	0.872255	0.351297	0.782435	0.952096	0.876248	0.977046	0.671657	0.518962	0.771457	0.983034	0.661677	0.999002	0.90519	0.951098	0.138723	0.383234	0.828343	0.898204	0.933134	0.610778	0.173653	0.650699	0.221557	0.651697	0.662675	0.513972	0.909182	0.702595	0.506986	0.115768	0.334331	0	0	0	0	0.46008	0.786427	0.94012	0.845309	0.841317	0.522954	0.365269	0.892216	0.93014	0.98004	0.876248	0.851297
Y	TAT	0.784431	0.700599	0.282435	0.141717	0.639721	0.754491	0.947106	0.964072	0.351297	0.682635	0.778443	0.92515	0.744511	0.798403	0.981038	0.936128	0.535928	0.438124	0.543912	0.702595	0.174651	0.167665	0.502994	0.741517	0.39521	0.896208	0.648703	0.979042	0.978044	0.547904	1	0.106786	0	0	0	0.00199601	0.184631	0.684631	0.923154	0.665669	0.423154	0.92515	0.96507	0.565868	0.212575	0.951098	0.659681	0.725549
*	TAA	N/A	N/A	N/A	N/A	N/A	N/A	N/A	N/A	N/A	N/A	N/A	N/A	N/A	N/A	N/A	N/A	N/A	N/A	N/A	N/A	N/A	N/A	N/A	N/A	N/A	N/A	N/A	N/A	N/A	N/A	N/A	N/A	N/A	N/A	N/A	N/A	N/A	N/A	N/A	N/A	N/A	N/A	N/A	N/A	N/A	N/A	N/A	N/A
*	TAG	N/A	N/A	N/A	N/A	N/A	N/A	N/A	N/A	N/A	N/A	N/A	N/A	N/A	N/A	N/A	N/A	N/A	N/A	N/A	N/A	N/A	N/A	N/A	N/A	N/A	N/A	N/A	N/A	N/A	N/A	N/A	N/A	N/A	N/A	N/A	N/A	N/A	N/A	N/A	N/A	N/A	N/A	N/A	N/A	N/A	N/A	N/A	N/A
C	TGC	0.846307	0.823353	0.384232	0.941118	0.689621	0.941118	0.984032	0.0708583	0.367265	0.0189621	0.869261	0.987026	0.776447	0.909182	0.724551	0.752495	0.911178	0.530938	0.748503	0.92515	0.394212	0.42515	0.820359	0.853293	0.809381	0.596806	0.471058	0.957086	0.601796	0.576846	0.978044	0.486028	0	0	0	0	0.407186	0.691617	0.902196	0.513972	0.563872	0.700599	0.340319	0.650699	0.597804	0.879242	0.733533	0.89521
C	TGT	0.983034	0.862275	0.551896	0.180639	0.906188	0.159681	0.697605	0.479042	0.214571	0.794411	0.966068	0.525948	0.863273	0.954092	0.553892	0.466068	0.324351	0.882236	0.93014	0.55489	0.974052	0.552894	0.942116	0.797405	0.411178	0.982036	0.983034	0.93513	0.169661	0.404192	0.847305	0.865269	0	0	0	0.000998004	0.397206	0.610778	0.665669	0.276447	0.618762	0.611776	0.0628743	0.966068	0.969062	0.657685	0.917166	0.824351
*	TGA	N/A	N/A	N/A	N/A	N/A	N/A	N/A	N/A	N/A	N/A	N/A	N/A	N/A	N/A	N/A	N/A	N/A	N/A	N/A	N/A	N/A	N/A	N/A	N/A	N/A	N/A	N/A	N/A	N/A	N/A	N/A	N/A	N/A	N/A	N/A	N/A	N/A	N/A	N/A	N/A	N/A	N/A	N/A	N/A	N/A	N/A	N/A	N/A
W	TGG	0.967066	0.396208	0.855289	0.805389	0.811377	0.488024	0.92515	0.738523	0.933134	0.642715	0.811377	0.941118	0.775449	0.794411	0.44511	0.148703	0.246507	0.791417	0.658683	0.541916	0.322355	0.46008	0.702595	0.827345	0.497006	0.846307	0.919162	0.91517	0.786427	0.819361	0.926148	0.838323	0	0	0	0	0.952096	0.733533	0.999002	0.870259	0.971058	0.620758	0.996008	0.936128	0.51996	0.886228	0.999002	0.848303
T	ACC	0.795409	0.359281	0.121756	0.301397	0.178643	0.99002	0.996008	0.432136	0.0459082	0.754491	0.776447	0.696607	0.537924	0.695609	0.93513	0.762475	0.00998004	0.907186	0.836327	0.601796	0.528942	0.0628743	0.0948104	0.772455	0.359281	0.701597	1	1	0.293413	0.735529	1	0.873253	0.337325	0.000998004	0	0.453094	0.255489	0.636727	0.931138	0.667665	0.530938	0.647705	0.96008	0.781437	0.898204	0.997006	0.999002	0.966068
T	ACT	0.829341	0.146707	0.560878	0.97505	0.886228	0.979042	0.912176	1	0.392216	0.697605	0.917166	0.50998	0.448104	0.443114	0.874251	0.922156	0.899202	0.864271	0.883234	0.667665	0.107784	0.679641	0.708583	0.392216	0.180639	0.840319	1	0.999002	0.307385	0.841317	1	0.571856	0.011976	0.198603	0	0.349301	0.411178	0.921158	0.933134	0.99002	0.467066	0.986028	0.949102	0.992016	0.0898204	0.949102	0.961078	0.946108
T	ACA	0.507984	0.446108	0.674651	0.46507	0.651697	0.479042	0.99501	0.787425	0.367265	0.304391	0.0538922	0.183633	0.00299401	0.608782	0.578842	0.373253	0.767465	0.155689	0.96008	0.269461	0.444112	0.210579	0.303393	0.749501	0.341317	0.551896	1	1	0.697605	0.848303	1	0.701597	0.011976	0.191617	0.903194	0.794411	0.187625	0.638723	0.481038	0.770459	0.394212	0.902196	0.879242	0.865269	0.151697	0.982036	1	0.813373
T	ACG	0.482036	0.593812	0.829341	0.874251	0.954092	0.11477	0.96008	0.010978	0.0319361	0.117764	0.517964	0.453094	0.676647	0.453094	0.797405	0.728543	0.702595	0.610778	0.304391	0.803393	0.313373	0.841317	0.748503	0.722555	0.903194	0.825349	1	1	0.477046	0.333333	1	0.626747	0	0	0	0.0169661	0.719561	0.367265	0.956088	0.0888224	0.0688623	0.844311	0.927146	0.93014	0.56487	0.981038	0.988024	0.853293
I	ATC	0.949102	0.685629	0.452096	0.977046	0.700599	0.99002	0.996008	0.921158	0.668663	0.334331	0.884232	0.615768	0.269461	0.55489	0.860279	0.654691	0.88024	0.858283	0.982036	0.94012	0.417166	0.825349	0.798403	0.977046	0.354291	0.763473	0.923154	0.936128	0.451098	0.518962	0.298403	0.757485	0	0	0	0	0.537924	0.353293	0.94012	0.664671	0.556886	0.856287	0.957086	0.982036	0.253493	0.0369261	0.996008	0.994012
I	ATT	0.820359	0.798403	0.240519	0.987026	0.736527	0.972056	0.92016	0.968064	0.969062	0.505988	0.767465	0.602794	0.288423	0.790419	0.58982	0.573852	0.721557	0.308383	0.330339	0.94012	0.536926	0.596806	0.773453	0.471058	0.461078	0.98004	0.991018	0.881238	0.794411	0.360279	0.657685	0.962076	0	0	0	0	0.634731	0.128743	0.992016	0.666667	0.596806	0.909182	0.869261	0.742515	0.300399	0.966068	0.860279	0.653693
I	ATA	0.541916	0.800399	0.779441	0.481038	0.525948	0.731537	0.99002	0.817365	0.705589	0.934132	0.799401	0.479042	0.714571	0.690619	0.307385	0.650699	0.0349301	0.820359	0.764471	0.806387	0.764471	0.733533	0.631737	0.786427	0.531936	0.98004	0.815369	0.522954	0.329341	0.51497	0.129741	0.363273	0	0	0	0	0.704591	0.650699	0.88024	0.856287	0.918164	0.881238	0.959082	0.911178	0.807385	0.989022	0.847305	0.874251
M	ATG	0.976048	0.834331	0.173653	0.305389	0.784431	0.762475	0.889222	0.101796	0.756487	0.739521	0.90519	0.523952	0.284431	0.472056	0.703593	0.811377	0.903194	0.464072	0.550898	0.448104	0.352295	0.133733	0.928144	0.742515	0.997006	0.888224	0.704591	0.685629	0.219561	0.618762	0.669661	0.749501	0	0	0	0	0.214571	0.437126	0.695609	0.426148	0.974052	0.961078	0.513972	0.954092	0.468064	0.454092	0.812375	0.994012
N	AAC	0.52994	0.672655	0.541916	0.542914	0.556886	0.99002	0.932136	0.0818363	0.893214	0.752495	0.892216	0.468064	0.855289	0.992016	0.931138	0.987026	0.57984	0.778443	0.610778	0.568862	0.702595	0.848303	0.743513	0.00399202	0.870259	0.904192	0.482036	0.894212	0.528942	0.769461	0.62475	0.644711	0	0	0	0	0.497006	0.42515	0.97006	0.541916	0.889222	0.953094	0.809381	0.810379	0.698603	0.715569	0.92515	0.675649
N	AAT	0.939122	0.452096	0.404192	0.847305	0.505988	0.683633	0.93014	0.472056	0.817365	0.443114	0.849301	0.887226	0.720559	0.633733	0.948104	0.791417	0.841317	0.45509	0.91517	0.927146	0.927146	0.628743	0.899202	0.770459	0.947106	0.493014	0.606786	0.473054	0.506986	0.443114	0.835329	0.469062	0	0	0	0	0.703593	0.366267	0.884232	0.740519	0.368263	0.944112	0.751497	0.832335	0.674651	0.493014	0.751497	0.654691
K	AAA	0.373253	0.98004	0.693613	0.422156	0.688623	0.325349	0.992016	0.0469062	0.942116	0.692615	0.873253	0.855289	0.280439	0.300399	0.627745	0.4002	0.726547	0.813373	0.409182	0.906188	0.409182	0.177645	0.869261	0.938124	0.663673	0.772455	0.971058	0.991018	0.931138	0.791417	0.452096	0.638723	0	0	0	0	0.41018	0.103792	0.966068	0.888224	1	0.984032	0.89022	0.988024	0.784431	0.773453	0.790419	0.93014
K	AAG	0.921158	0.829341	0.622754	0.822355	0.273453	0.944112	0.947106	0.570858	0.982036	0.722555	0.817365	0.860279	0.595808	0.653693	0.909182	0.97505	0.354291	0.734531	0.927146	0.718563	0.922156	0.315369	0.703593	0.674651	0.292415	0.964072	0.93014	0.344311	0.0469062	0.973054	0.593812	0.749501	0	0	0	0	0.453094	0.923154	0.861277	0.255489	0.730539	0.87525	0.974052	0.792415	0.629741	0.649701	0.942116	0.937126
S	AGC	0.536926	0.498004	0.57984	0.58982	0.592814	0.732535	0.998004	0.486028	0.926148	0.893214	0.606786	0.859281	0.882236	0.767465	0.769461	0.923154	0.58483	0.147705	0.225549	0.674651	0.924152	0.255489	0.93014	0.93014	0.268463	0.709581	0.789421	0.997006	0.778443	0.736527	0.608782	0.884232	0	0	0	0	0.89022	0.978044	0.413174	0.826347	0.808383	0.38523	0.731537	0.726547	0.318363	0.99501	0.903194	0.899202
S	AGT	0.93014	0.709581	0.653693	0.422156	0.979042	0.499002	0.830339	0.956088	0.873253	0.57984	0.823353	0.602794	0.664671	0.719561	0.781437	0.310379	0.511976	0.301397	0.774451	0.605788	0.150699	0.283433	0.437126	0.581836	0.783433	0.59481	0.4002	0.184631	0.320359	0.161677	0.972056	0.814371	0	0	0	0	0.611776	0.662675	0.532934	0.328343	0.936128	0.806387	0.226547	0.914172	0.821357	0.324351	0.645709	0.740519
R	AGA	0.703593	0.517964	0.951098	0.402196	0.561876	0.387226	0.739521	0.778443	0.93513	0.580838	0.728543	0.723553	0.515968	0.728543	0.740519	0.851297	0.931138	0.809381	0.572854	0.814371	0.590818	0.807385	0.865269	0.476048	0.444112	0.91018	0.307385	0.776447	0.661677	0.377246	0.999002	0.0838323	0	0	0	0	0.881238	0.744511	0.854291	0.904192	0.92016	0.903194	0.813373	0.941118	0.680639	0.838323	0.836327	0.793413
R	AGG	0.919162	0.906188	0.963074	1	0.904192	0.986028	1	0.847305	0.962076	0.505988	0.466068	0.5	0.0898204	0.275449	0.53493	0.615768	0.724551	0.515968	0.449102	0.100798	0.726547	0.654691	0.855289	0.347305	0.592814	0.516966	0.983034	0.521956	0.456088	0.775449	0.616766	0.886228	0	0	0	0	0.692615	0.714571	0.848303	0.710579	0.941118	0.718563	0.999002	0.700599	0.976048	0.531936	0.976048	0.702595
A	GCC	0.755489	0.651697	0.302395	0.932136	0.637725	0.999002	1	0.856287	0.639721	0.868263	0.242515	0.387226	0.811377	0.889222	0.44511	0.674651	0.670659	0.993014	0.662675	0.629741	0.172655	0.744511	0.815369	0.47505	0.296407	0.90519	1	0.716567	0.952096	0.966068	0.977046	0.662675	0	0	0	0	0.612774	0.547904	0.360279	0.483034	0.227545	0.253493	0.438124	0.957086	0.904192	0.685629	0.96507	0.994012
A	GCT	0.833333	0.87525	0.860279	0.871257	0.96507	0.794411	0.998004	0.583832	0.712575	0.452096	0.700599	0.864271	0.780439	0.586826	0.818363	0.864271	0.623752	0.941118	0.679641	0.383234	0.188623	0.946108	0.570858	0.691617	0.879242	0.752495	0.96008	1	0.952096	0.659681	0.887226	0.753493	0	0	0	0	0.0538922	0.824351	0.781437	0.679641	0.851297	0.535928	0.213573	0.313373	0.441118	0.783433	0.281437	0.96507
A	GCA	0.363273	0.692615	0.840319	0.528942	0.512974	0.541916	0.838323	0.830339	0.0928144	0.972056	0.195609	0.904192	0.700599	0.412176	0.723553	0.792415	0.45509	0.443114	0.862275	0.829341	0.820359	0.780439	0.964072	0.553892	0.612774	0.754491	1	0.303393	0.617764	0.216567	0.99501	0.959082	0	0	0	0	0.811377	0.384232	0.531936	0.690619	0.617764	0.828343	0.659681	0.891218	0.755489	0.772455	0.968064	0.841317
A	GCG	0.797405	0.462076	0.654691	0.814371	0.951098	0.690619	1	0.841317	0.699601	0.561876	0.878244	0.987026	0.185629	0.0638723	0.570858	0.768463	0.346307	0.203593	0.727545	0.958084	0.694611	0.408184	0.958084	0.852295	0.57984	0.543912	1	0.999002	0.892216	0.991018	0.994012	0.687625	0	0	0	0	0.291417	0.602794	0.793413	0.807385	0.186627	0.285429	1	0.826347	0.442116	0.923154	0.994012	0.902196
V	GTC	0.731537	0.628743	0.646707	0.62475	0.864271	0.958084	0.961078	0.728543	0.719561	0.969062	0.814371	0.689621	0.857285	0.958084	0.653693	0.607784	0.290419	0.747505	0.869261	0.983034	0.42515	0.957086	0.809381	0.161677	0.681637	0.909182	1	0.948104	0.797405	0.773453	0.550898	0.745509	0	0	0	0	0.809381	0.373253	0.849301	0.884232	0.958084	0.373253	0.989022	0.854291	0.971058	0.49002	0.718563	0.998004
V	GTT	0.245509	0.46507	0.780439	0.161677	0.678643	0.775449	0.499002	0.9501	0.815369	0.876248	0.684631	0.649701	0.591816	0.298403	0.984032	0.642715	0.707585	0.176647	0.664671	0.632735	0.761477	0.636727	0.413174	0.565868	0.557884	0.423154	0.44012	0.973054	0.597804	0.552894	0.908184	0.0678643	0	0	0	0	0.88024	0.856287	0.487026	0.946108	0.540918	0.00299401	0.983034	0.734531	0.522954	0.953094	0.861277	0.853293
V	GTA	0.602794	0.5499	0.353293	0.972056	0.309381	0.986028	0.93513	0.571856	0.456088	0.760479	0.821357	0.46008	0.358283	0.926148	0.530938	0.634731	0.295409	0.61477	0.678643	0.904192	0.371257	0.177645	0.213573	0.673653	0.53493	0.635729	0.404192	0.622754	0.563872	0.329341	0.792415	0.774451	0	0	0	0	0.638723	0.92016	0.794411	0.770459	0.177645	0.969062	0.672655	0.956088	0.602794	0.736527	0.592814	0.768463
V	GTG	0.697605	0.854291	0.99002	0.540918	0.411178	0.907186	0.878244	0.929142	0.864271	0.552894	0.0578842	0.898204	0.318363	0.372255	0.824351	0.908184	0.901198	0.981038	0.496008	0.170659	0.494012	0.492016	0.207585	0.650699	0.972056	0.89521	0.951098	0.655689	0.873253	0.96507	0.794411	0.704591	0	0	0	0	0.62475	0.842315	0.426148	0.635729	0.88024	0.57984	0.0319361	0.891218	0.964072	0.734531	0.948104	0.96507
D	GAC	0.49501	0.150699	0.172655	0.754491	0.856287	0.664671	0.828343	0.713573	0.208583	0.788423	0.56487	0.286427	0.60978	0.496008	0.647705	0.626747	0.668663	0.964072	0.792415	0.989022	0.565868	0.860279	0.831337	0.735529	0.45509	0.951098	0.862275	0.548902	0.433134	0.635729	0.278443	0.631737	0	0	0	0	0.314371	0.398204	0.98503	0.558882	0.438124	0.500998	0.957086	0.987026	0.759481	0.811377	0.927146	0.90519
D	GAT	0.616766	0.398204	0.581836	0.353293	0.677645	0.705589	0.783433	0.820359	0.873253	0.792415	0.769461	0.443114	0.234531	0.0898204	0.879242	0.805389	0.38024	0.701597	0.259481	0.991018	0.874251	0.325349	0.98004	0.47505	0.202595	0.403194	0.192615	0.811377	0.293413	0.0199601	0.00399202	0.738523	0	0	0	0	0.573852	0.825349	0.310379	0.317365	0.712575	0.896208	0.999002	0.918164	0.0918164	0.233533	0.324351	0.837325
E	GAA	0.702595	0.697605	0.743513	0.204591	0.684631	0.169661	0.986028	0.50499	0.256487	0.50499	0.914172	0.687625	0.312375	0.717565	0.717565	0.452096	0.433134	0.200599	0.517964	0.702595	0.896208	0.94511	0.9501	0.779441	0.752495	0.746507	0.562874	0.899202	0.153693	0.591816	0.705589	0.874251	0	0	0	0	0.602794	0.785429	0.209581	0.303393	0.949102	0.837325	0.845309	0.924152	0.781437	0.218563	0.97505	0.736527
E	GAG	0.325349	0.797405	0.471058	0.0199601	0.674651	0.149701	0.219561	0.586826	0.894212	0.0359281	0.51996	0.937126	0.366267	0.974052	0.141717	0.809381	0.869261	0.808383	0.967066	0.996008	0.917166	0.284431	0.852295	0.271457	0.848303	0.842315	0.525948	0.327345	0.872255	0.444112	0.996008	0.393214	0	0	0	0	0.555888	0.998004	0.453094	0.944112	0.366267	0.60479	0.913174	0.407186	0.655689	0.958084	0.283433	0.845309
G	GGC	0.94012	0.882236	0.689621	0.811377	0.947106	0.941118	0.989022	0.865269	0.893214	0.843313	0.618762	0.623752	0.712575	0.780439	0.91018	0.409182	0.726547	0.894212	0.684631	0.608782	0.290419	0.989022	0.982036	0.851297	0.62475	0.0928144	0.807385	1	0.672655	0.464072	0.998004	0.399202	0	0	0	0	0.816367	0.846307	0.730539	0.869261	0.527944	0.919162	0.310379	0.896208	0.260479	0.917166	0.98503	0.147705
G	GGT	0.892216	0.325349	0.239521	0.90519	0.834331	0.795409	1	0.696607	0.766467	0.593812	0.904192	0.501996	0.857285	0.623752	0.444112	0.671657	0.937126	0.673653	0.688623	0.241517	0.143713	0.577844	0.56986	0.832335	0.698603	0.53493	0.90519	0.453094	0.48503	0.229541	0.179641	0.921158	0	0	0	0	0.597804	0.626747	0.563872	0.742515	0.864271	0.903194	0.956088	0.613772	0.378244	0.0379242	0.682635	0.532934
G	GGA	0.921158	0.962076	0.681637	0.54491	0.605788	0.896208	0.922156	0.974052	0.618762	0.305389	0.997006	0.411178	0.829341	0.982036	0.531936	0.215569	0.611776	0.767465	0.652695	0.745509	0.344311	0.123752	0.98503	0.761477	0.502994	0.978044	0.275449	0.797405	0.887226	0.828343	0.553892	0.702595	0	0	0	0	0.936128	0.229541	0.898204	0.824351	0.197605	0.630739	0.871257	0.994012	0.546906	0.917166	0.805389	0.99002
G	GGG	0.46008	0.715569	0.793413	0.313373	0.756487	0.802395	0.98503	0.766467	0.523952	0.862275	0.674651	0.757485	0.215569	0.958084	0.468064	0.100798	0.45509	0.252495	0.309381	0.598802	0.505988	0.779441	0.781437	0.596806	0.581836	0.812375	0.613772	0.997006	0.993014	0.484032	0.451098	0.730539	0	0	0	0	0.903194	0.778443	0.494012	0.748503	0.206587	0.156687	0.324351	0.835329	0.96507	0.997006	0.169661	0.572854
[truncated: 214 more columns]

## Sheet: Aminoacid heatmap
Stop efficiency at the corresponging amino acid residue in the -2nd position while mRNA codon with specified index number is located in the P-site												Stop efficiency at the corresponging amino acid residue in the E-site while mRNA codon with specified index number is located in the P-site												Stop efficiency at the corresponging amino acid residue in the P-site while mRNA codon with specified index number is located in the P-site												Stop efficiency at the corresponging amino acid residue in the A-site while mRNA codon with specified index number is located in the P-site												Stop efficiency at the corresponging amino acid residue in the 2nd position while mRNA codon with specified index number is located in the P-site
-2	Index number of mRNA codon located in the P-site											E	Index number of mRNA codon located in the P-site											P	Index number of mRNA codon located in the P-site											A	Index number of mRNA codon located in the P-site											2	Index number of mRNA codon located in the P-site
	4	5	6	7	8	9	10	11	12	13			3	4	5	6	7	8	9	10	11	12			2	3	4	5	6	7	8	9	10	11			1	2	3	4	5	6	7	8	9	10			1
W	0.00600208	-0.000618074	-0.00759864	-0.0155274	-0.0108799	-0.00781702	-0.0111734	-0.0273569	-0.00524642	-0.00488547		W	0.00111401	-0.00178962	-0.000886908	0.000975342	-0.0223221	-0.00858571	-0.0121132	-0.0106816	-0.0294884	-6.40386e-05		W	-0.00190967	0.00415175	0.0114563	-0.00285117	-0.00313676	-0.0149916	-0.0164041	-0.0031173	-0.0102301	-0.03271		W	0.00838845	-5.95511e-05	-0.00217805	-0.00340454	-0.00785971	-0.00623573	-0.033494	-0.0128666	-0.0157305	-0.0177511		W	0.0028582
Y	0.00726582	0.00902922	-0.0113218	-0.0131224	-0.0108544	-0.00350899	-0.013606	-0.0270781	-0.0093233	-0.00473443		Y	0.00121842	0.00665525	0.0026977	-0.0068079	-0.0176504	-0.010309	-0.0143286	-0.0125423	-0.0300655	-0.00959936		Y	0.00579778	-0.00187157	0.00527719	0.00712823	-0.000517714	-0.0233951	-0.0110259	-0.0157712	-0.00412682	-0.0362718		Y	-0.0127937	-0.0117299	-0.0147716	-0.0132346	-0.0123293	-0.0098134	-0.0281681	-0.0242777	-0.0168144	-0.019025		Y	0.0144927
F	0.00414108	0.00485476	-0.0129886	-0.0240197	-0.00879933	-0.0205959	-0.016571	-0.0369389	-0.00700755	-0.00497962		F	0.00390019	0.00549159	0.000931376	8.08559e-05	-0.0140798	-0.00541746	-0.0081887	-0.0170315	-0.0302879	-0.0083799		F	0.0115808	0.00854334	-0.00108817	0.00410996	-0.00437475	-0.00670034	-0.0109031	-0.0135167	-0.0224126	-0.0261568		F	0.00473476	-0.00411467	-0.00620014	0.00054099	-0.000292459	-0.00609323	-0.018568	-0.0102231	-0.013207	-0.0181249		F	0.0166062
I	0.000716082	0.00699151	-0.00440294	-0.0189513	-0.0106877	-0.0129188	-0.0104088	-0.0376039	-0.0115292	-0.00749771		I	0.00434895	0.000847141	0.00750153	-0.000538762	-0.00589271	-0.0116562	-0.0122962	-0.00373982	-0.0287541	-0.00957414		I	0.0161147	-0.00119269	-0.000616853	0.00885099	0.00731894	-0.00496884	-0.0082581	-0.012561	-0.0172874	-0.0310759		I	-0.0171017	-0.0167385	-0.0113488	-0.0105581	-0.0114502	-0.0178529	-0.0218535	-0.0167286	-0.0147137	-0.0225396		I	0.01849
L	0.00329874	0.0053296	-0.00698836	-0.0112832	-0.0125866	-0.01284	-0.0166033	-0.0271179	-0.00865212	-0.00660384		L	0.00535528	0.0074027	0.00785891	0.0024782	-0.0112754	-0.0115211	-0.0100128	-0.01281	-0.0257056	-0.00722779		L	0.0119009	0.000881985	0.000789321	0.0069975	-0.00871269	-0.0155077	-0.0120237	-0.00964468	-0.0149824	-0.0330913		L	-0.0149487	-0.0140489	-0.0118139	-0.0157966	-0.0156455	-0.0186448	-0.0266844	-0.0188314	-0.0176986	-0.0215599		L	0.0200146
V	0.00494958	0.000872152	-0.00618051	-0.0163335	-0.0108432	-0.0127492	-0.0136288	-0.0233399	-0.0107574	-0.00369949		V	0.00460617	0.00183126	0.00192063	-0.000284173	-0.0167488	-0.0139265	-0.00812748	-0.00913221	-0.0301802	-0.00983121		V	0.00842723	0.000822614	0.00527172	0.0054795	-0.00356992	-0.00980549	-0.00795765	-0.0056683	-0.0153439	-0.0249439		V	-0.00397956	-0.00450277	-0.000947761	-0.00457645	-0.00481979	-0.00766365	-0.0190906	-0.0105676	-0.00929373	-0.0142275		V	0.0145846
M	0.015903	0.0058287	-0.00381413	-0.0244112	-0.00988902	-0.0108878	-0.0221894	-0.0132822	-0.00714936	-0.0123693		M	0.0043693	0.00956442	0.0128001	-0.00527584	-0.0158831	-0.00132265	-0.0115086	-0.00959016	-0.0283705	-0.0137345		M	0.0103795	-0.00220493	0.00740419	0.0124696	0.0154738	-0.013151	-0.000924644	-0.0084339	-0.00774488	-0.0358505		M	-0.00580831	-0.0170836	-0.0119755	-0.0109533	-0.00762238	-0.00501705	-0.0254048	-0.0169132	-0.0145637	-0.0224989		M	0.00177806
A	0.00182078	0.00387613	-0.0041084	-0.00979292	-0.0107939	-0.0113869	-0.0128023	-0.0255617	-0.00827798	-0.0037418		A	0.00288738	0.0028678	2.32294e-05	-0.00730498	-0.0138609	-0.0138085	-0.012714	-0.0138007	-0.0256452	-0.00851988		A	0.00910314	0.0045991	0.00204214	0.00869459	-0.00444951	-0.0151249	-0.00994928	-0.0111432	-0.0136424	-0.0194361		A	0.00258679	-0.00165834	-0.00676832	-0.00521447	-0.00671189	-0.0143685	-0.0176861	-0.0137764	-0.014506	-0.0154529		A	0.0176393
T	-0.0452666	-0.0315733	-0.0261773	-0.0418143	-0.0225666	-0.0192222	-0.0243395	-0.0346732	-0.00443547	-0.00372145		T	-0.0308794	-0.0358314	-0.0234559	-0.0227821	-0.033197	-0.017252	-0.0169077	-0.0190192	-0.0308383	-0.00919559		T	-0.0249925	0.001349	-0.00443757	-0.0034553	-0.00981024	-0.00718871	-0.0103029	-0.0101459	-0.0156619	-0.0207416		T	0.42586	0.297978	0.168561	0.178764	0.172562	0.121762	0.0659441	0.0587294	0.0499784	0.0720502		T	0.0349207
S	0.00192053	0.00513006	-0.00376923	-0.0112703	-0.0105885	-0.0110351	-0.0140308	-0.0260258	-0.00550029	-0.00253174		S	0.00306134	0.00481725	-9.41049e-05	-0.00662068	-0.0136198	-0.009326	-0.0129042	-0.0155295	-0.0233701	-0.00602687		S	0.00993557	0.00299873	0.00370078	0.00306084	-0.00333334	-0.0137086	-0.00801646	-0.0113502	-0.0114043	-0.0268805		S	-0.00543569	-0.00772871	-0.0107043	-0.00867236	-0.00885143	-0.0130668	-0.0184383	-0.0175015	-0.0152668	-0.0201871		S	0.0178139
G	0.00665158	0.00827519	0.00241072	-0.0126905	-0.0108185	-0.0085259	-0.0127474	-0.0211312	-0.00596532	-0.00160622		G	0.00653021	0.00729226	0.00633579	-0.00723792	-0.0114117	-0.0137861	-0.0113395	-0.0118002	-0.0164243	-0.00327373		G	0.00228548	0.0031373	0.00275187	0.00450582	-0.0024603	-0.0149575	-0.0125358	-0.0121927	-0.00939292	-0.0209721		G	-0.00208251	-0.00350689	-0.00351774	-0.00571711	-0.00548495	-0.00948019	-0.0171302	-0.0119775	-0.0123365	-0.0164759		G	0.0149321
P	0.00134288	-0.000191383	-0.00549658	-0.0160004	-0.0101902	-0.0102768	-0.0124496	-0.0232992	-0.008327	-0.00439503		P	0.000555903	-0.00541048	-0.00459241	-0.0083239	-0.023374	-0.0178756	-0.0202223	-0.0207692	-0.0303477	-0.00661942		P	0.00717738	-0.00377223	-0.0065814	-0.0107532	-0.0139332	-0.0299282	-0.0244581	-0.0250813	-0.0238482	-0.0329947		P	0.0091509	0.000854164	-0.00207105	-0.0058825	-0.00831166	-0.0126073	-0.0252881	-0.0189003	-0.0214915	-0.0219803		P	0.0182693
Q	0.00332686	0.0178309	0.00469058	-0.00396458	-0.0125742	-0.0132699	-0.0182689	-0.0282578	-0.00166293	-0.01214		Q	0.0134874	0.00196559	0.0128414	0.00491771	-0.0138641	-0.00874724	-0.0036046	-0.00462253	-0.0229298	-0.00947359		Q	0.0167675	0.00830385	0.00677063	0.0156866	0.00383046	-0.0103165	-0.00905398	-0.0112794	-0.00764827	-0.0233949		Q	-0.0129317	-0.0153162	-0.00863238	-0.0132643	-0.0136299	-0.0149812	-0.021538	-0.0137541	-0.0125794	-0.0183142		Q	0.0293527
N	0.0136843	0.0194242	-0.00495902	-0.0139609	-0.0115324	-0.014701	-0.00740944	-0.028428	-0.0138019	-0.00389608		N	0.0154917	0.00468414	0.0148677	-0.00238345	-0.0102582	-0.00590319	-0.00911652	-0.00798846	-0.0209905	-0.00501538		N	0.0132657	0.0029974	-0.00145443	0.00639597	-0.00562299	-0.00787888	-0.00788608	-0.00598842	-0.0157026	-0.0234271		N	-0.0163918	-0.0189667	-0.0116137	-0.0148415	-0.014026	-0.0145947	-0.031553	-0.0162981	-0.0199451	-0.0231533		N	0.0381196
H	0.00963681	0.00477563	-0.00743596	-0.0067738	-0.0134801	-0.00749418	-0.0142617	-0.0340918	-0.00831266	-0.0047701		H	0.00720791	0.00446729	0.0101709	-0.00318378	-0.00746537	-0.00993029	-0.00771657	-0.0150038	-0.0326276	-0.0131521		H	0.0167204	0.00390508	0.00139171	0.00102326	-0.00512298	-0.0180356	-0.0128854	-0.0130336	-0.0130453	-0.0274288		H	-0.00055696	-0.00580572	-0.00921923	-0.00877635	-0.00554314	-0.0115924	-0.0169472	-0.012674	-0.0134612	-0.0125266		H	0.0298382
C	0.00830541	0.00313057	0.00140195	-0.018305	-0.0133561	-0.0115866	-0.0162944	-0.0308494	-0.0120101	-0.00343964		C	-6.88386e-05	0.000304186	0.00494611	-0.00386195	-0.00983757	-0.00828111	-0.010487	-0.0170231	-0.0212162	-0.00574413		C	-0.00366959	0.00431591	0.00756132	-0.000171452	0.000305085	-0.0134959	-0.0116286	-0.0106398	-0.0192627	-0.0297391		C	-0.000288554	-0.00439033	-0.00935126	-0.00996952	-0.00969336	-0.00903929	-0.0259332	-0.016772	-0.0194375	-0.0194755		C	0.0119593
K	0.0101147	0.0100904	0.00209482	-0.000379671	-0.00808141	-0.012866	-0.00977271	-0.0236049	-0.00750489	-0.00587074		K	0.0112835	0.00958763	0.0231714	0.01956	-0.0115002	-0.00169705	0.000495307	-0.0113297	-0.0195235	0.00349532		K	0.0106477	0.0020367	-0.00531194	-0.00349387	-0.00548889	-0.0111505	-0.00957654	-0.00937183	-0.00772307	-0.0230884		K	-0.0201481	-0.0261815	-0.013955	-0.0192732	-0.0173933	-0.0181152	-0.0385799	-0.0152746	-0.0194275	-0.0313883		K	0.035272
R	0.00406253	0.00388544	-0.00252269	-0.0133891	-0.0117803	-0.0128708	-0.010367	-0.0266833	-0.00847579	-0.00296501		R	0.00122665	0.00576137	0.00971482	-0.00370194	-0.00704925	-0.00859804	-0.00831574	-0.0121012	-0.0311806	-0.0116279		R	0.00979577	0.00556378	0.00589345	0.00690247	-0.00265592	-0.0146999	-0.0115616	-0.00770237	-0.0127146	-0.0302041		R	-0.00255558	-0.00866067	-0.00409116	-0.0103616	-0.00839585	-0.0157087	-0.0250392	-0.0164005	-0.0165628	-0.0164676		R	0.0171692
E	0.00603745	0.00342992	-0.00306279	-0.00964379	-0.0107305	-0.0132894	-0.0157994	-0.0225425	-0.00123701	-0.00269966		E	0.010424	0.014266	0.00852696	0.00158987	-0.0173754	-0.00878734	-0.0113266	-0.0167446	-0.0266143	-0.00213578		E	-0.0053651	-0.00211667	0.00168643	0.0187782	-0.00585836	-0.00426255	-0.00718722	-0.00719921	-0.00349685	-0.0175049		E	-0.00472792	-0.0155802	-0.00760848	-0.00446519	-0.011696	-0.00100041	-0.00905861	-0.0164924	-0.0161698	-0.023327		E	0.025403
D	0.00239516	0.00196115	-0.000649243	-0.0227969	-0.00439937	-0.0175281	-0.0119151	-0.0167432	-0.00653619	0.000985063		D	0.00505084	0.00341451	0.00717601	-0.00825273	-0.0194339	-0.0108584	-0.0133945	-0.01463	-0.0180689	-0.00955414		D	0.0135598	0.0053775	0.00625973	0.000932123	0.00392718	-0.0101827	-0.00534447	-0.00870957	-0.00716327	-0.0228251		D	-0.0005517	-0.00718018	-0.00819046	0.000998356	-0.00773421	-0.00800387	-0.0238633	-0.0127531	-0.0144682	-0.0119929		D	0.0195997
*	0	0	0	0	0	0	0	0	0	0		*	0	0	0	0	0	0	0	0	0	0		*	0	0	0	0	0	0	0	0	0	0		*	0.0073586	-0.0323476	-0.0207398	-0.0326417	-0.0335677	-0.039169	-0.0531502	-0.0382187	-0.0440344	-0.0366055		*	0.02635
[truncated: 8 more columns]

## Sheet: P-value for aminoacid heatmap
P-value for shuffled datasets exceeding experimental data of stop efficiency at the corresponging amino acid residue in the -2nd position while mRNA codon with specified index number is located in the P-site												P-value for shuffled datasets exceeding experimental data of stop efficiency at the corresponging amino acid residue in the E-site while mRNA codon with specified index number is located in the P-site												P-value for shuffled datasets exceeding experimental data of stop efficiency at the corresponging amino acid residue in the P-site while mRNA codon with specified index number is located in the P-site												P-value for shuffled datasets exceeding experimental data of stop efficiency at the corresponging amino acid residue in the A-site while mRNA codon with specified index number is located in the P-site												P-value for shuffled datasets exceeding experimental data of stop efficiency at the corresponging amino acid residue in the 2nd position while mRNA codon with specified index number is located in the P-site
-2	Index number of mRNA codon located in the P-site											E	Index number of mRNA codon located in the P-site											P	Index number of mRNA codon located in the P-site											A	Index number of mRNA codon located in the P-site											2	Index number of mRNA codon located in the P-site
	4	5	6	7	8	9	10	11	12	13			3	4	5	6	7	8	9	10	11	12			2	3	4	5	6	7	8	9	10	11			1	2	3	4	5	6	7	8	9	10			1
W	0.122754	0.779441	0.712575	0.568862	0.471058	0.0998004	0.236527	0.634731	0.274451	0.621756		W	0.567864	0.740519	0.775449	0.116766	0.938124	0.196607	0.462076	0.178643	0.764471	0.0199601		W	0.911178	0.328343	0.0239521	0.882236	0.393214	0.526946	0.884232	0.00299401	0.180639	0.921158		W	0.953094	0.863273	0.818363	0.825349	0.981038	0.597804	0.996008	0.566866	0.821357	0.820359		W	0.99002
Y	0.140719	0.0528942	0.919162	0.377246	0.483034	0.00898204	0.489022	0.627745	0.682635	0.603792		Y	0.568862	0.0848303	0.516966	0.613772	0.699601	0.38024	0.754491	0.365269	0.832335	0.715569		Y	0.551896	0.853293	0.236527	0.252495	0.220559	0.906188	0.399202	0.851297	0.00499002	0.992016		Y	1	1	1	0.994012	0.994012	0.791417	0.98004	1	0.9002	0.884232		Y	0.839321
F	0	0.311377	0.974052	0.97505	0.214571	0.999002	0.740519	0.99501	0.429142	0.660679		F	0	0.184631	0.681637	0.153693	0.483034	0.0489022	0.126747	0.764471	0.821357	0.596806		F	0	0.0578842	0.707585	0.451098	0.47006	0.0678643	0.376248	0.639721	0.991018	0.46507		F	0.997006	0.964072	0.97505	0.583832	0.761477	0.570858	0.667665	0.286427	0.603792	0.873253		F	0.677645
I	0.601796	0.170659	0.487026	0.883234	0.42016	0.694611	0.151697	0.998004	0.87525	0.91517		I	0.223553	0.56487	0.154691	0.167665	0.0349301	0.53992	0.578842	0.000998004	0.712575	0.712575		I	0.00698603	0.806387	0.684631	0.0848303	0.00299401	0.0329341	0.0918164	0.515968	0.809381	0.869261		I	1	1	1	0.999002	1	0.993014	0.919162	0.892216	0.754491	0.989022		I	0.553892
L	0.132735	0.164671	0.793413	0.0878244	0.744511	0.791417	0.929142	0.767465	0.748503	0.98503		L	0.0129741	0.00898204	0.0349301	0.00199601	0.0878244	0.441118	0.100798	0.253493	0.424152	0.427146		L	0.00499002	0.736527	0.632735	0.0598802	0.94511	0.551896	0.513972	0.0439122	0.658683	1		L	1	1	1	1	1	1	1	1	1	1		L	0.44012
V	0.143713	0.785429	0.684631	0.744511	0.362275	0.681637	0.459082	0.10978	0.9501	0.45509		V	0.212575	0.438124	0.652695	0.0528942	0.704591	0.850299	0.0189621	0.00598802	0.953094	0.871257		V	0.329341	0.682635	0.11477	0.219561	0.367265	0.0558882	0.0249501	0	0.703593	0.176647		V	1	1	0.89022	0.987026	0.989022	0.800399	0.858283	0.189621	0.0538922	0.43513		V	0.907186
M	0.0229541	0.341317	0.46008	0.918164	0.354291	0.437126	0.942116	0.0349301	0.463074	0.959082		M	0.377246	0.137725	0.0628743	0.567864	0.577844	0.0279441	0.458084	0.217565	0.61976	0.841317		M	0.346307	0.746507	0.180639	0.0968064	0.00199601	0.4002	0.0139721	0.235529	0.134731	0.918164		M	0.999002	0.997006	0.98503	0.957086	0.927146	0.496008	0.89022	0.798403	0.660679	0.913174		M	0.967066
A	0.46008	0.374251	0.378244	0.00998004	0.257485	0.371257	0.231537	0.453094	0.715569	0.436128		A	0.347305	0.276447	0.913174	0.878244	0.295409	0.918164	0.706587	0.472056	0.326347	0.704591		A	0.176647	0.0908184	0.411178	0.00598802	0.402196	0.478044	0.0538922	0.211577	0.311377	0		A	1	1	1	0.998004	1	1	0.842315	0.886228	0.95509	0.727545		A	0.752495
T	1	1	1	1	1	1	1	1	0.0489022	0.456088		T	1	1	1	1	1	1	1	0.994012	0.991018	0.772455		T	1	0.58982	0.977046	0.988024	0.968064	0.00299401	0.190619	0.127745	0.781437	0.010978		T	0	0	0	0	0	0	0	0	0	0		T	0
S	0.468064	0.191617	0.361277	0.0878244	0.292415	0.297405	0.586826	0.506986	0.10479	0.131737		S	0.317365	0.0838323	0.913174	0.807385	0.324351	0.0518962	0.757485	0.816367	0.0499002	0.167665		S	0.135729	0.301397	0.201597	0.536926	0.260479	0.279441	0.00299401	0.288423	0.0399202	0.560878		S	1	1	1	1	1	0.999002	0.889222	1	0.984032	1		S	0.696607
G	0.010978	0.011976	0.000998004	0.244511	0.305389	0	0.225549	0.000998004	0.151697	0.0309381		G	0.00499002	0.00598802	0.0758483	0.882236	0.0568862	0.921158	0.289421	0.0848303	0	0.00499002		G	0.961078	0.296407	0.322355	0.282435	0.134731	0.436128	0.631737	0.5	0.000998004	0		G	1	1	1	0.999002	1	0.981038	0.764471	0.464072	0.478044	0.896208		G	0.947106
P	0.571856	0.95509	0.660679	0.736527	0.106786	0.0578842	0.141717	0.0489022	0.751497	0.716567		P	0.820359	1	1	0.968064	1	1	1	1	0.999002	0.221557		P	0.426148	1	1	1	1	1	1	1	1	1		P	0.999002	0.999002	0.99501	1	1	1	1	1	1	1		P	0.720559
Q	0.342315	0	0.00798403	0.00499002	0.61976	0.745509	0.933134	0.790419	0.0409182	1		Q	0.00199601	0.46008	0.00598802	0.00798403	0.41018	0.0788423	0	0.000998004	0.212575	0.733533		Q	0.0329341	0.0329341	0.112774	0.00199601	0.0179641	0.113772	0.151697	0.365269	0.0309381	0.171657		Q	1	1	0.998004	1	1	0.994012	0.90519	0.740519	0.528942	0.894212		Q	0.0219561
N	0.00998004	0	0.546906	0.48503	0.528942	0.849301	0.0279441	0.697605	0.93014	0.520958		N	0.00399202	0.208583	0.00499002	0.315369	0.191617	0.0618762	0.159681	0.0838323	0.112774	0.275449		N	0.115768	0.41018	0.797405	0.260479	0.561876	0.125749	0.11477	0.0578842	0.630739	0.263473		N	1	1	1	0.998004	1	0.96008	0.998004	0.836327	0.98503	0.969062		N	0.000998004
H	0.0219561	0.334331	0.777445	0.0179641	0.812375	0.0229541	0.543912	1	0.648703	0.688623		H	0.0948104	0.196607	0.0279441	0.342315	0.0479042	0.245509	0.0259481	0.677645	0.99002	0.988024		H	0.0279441	0.271457	0.510978	0.724551	0.50998	0.775449	0.645709	0.670659	0.357285	0.630739		H	1	1	1	0.997006	0.984032	0.958084	0.653693	0.5998	0.666667	0.233533		H	0.011976
C	0.00199601	0.481038	0.0668663	0.802395	0.811377	0.508982	0.806387	0.937126	0.937126	0.439122		C	0.736527	0.606786	0.301397	0.423154	0.127745	0.121756	0.270459	0.863273	0.0688623	0.245509		C	0.98503	0.296407	0.0528942	0.797405	0.112774	0.374251	0.446108	0.275449	0.946108	0.848303		C	1	0.989022	0.997006	0.999002	0.999002	0.816367	0.98503	0.951098	0.992016	0.96507		C	0.899202
K	0.0349301	0.0429142	0.0578842	0.00299401	0.120758	0.606786	0.153693	0.335329	0.507984	0.694611		K	0.00399202	0.0339321	0	0	0.255489	0.00299401	0	0.292415	0.0918164	0.0149701		K	0.224551	0.511976	0.936128	0.870259	0.558882	0.257485	0.259481	0.244511	0.0898204	0.293413		K	1	1	1	1	1	0.99002	1	0.744511	0.9501	0.997006		K	0.00199601
R	0.116766	0.347305	0.112774	0.256487	0.602794	0.824351	0.00199601	0.716567	0.779441	0.158683		R	0.714571	0.0209581	0	0.259481	0	0.000998004	0	0.0668663	0.998004	0.998004		R	0.0888224	0.0179641	0.0139721	0.0219561	0.11976	0.38024	0.360279	0	0.126747	0.99501		R	1	1	1	1	1	1	1	1	1	0.941118		R	0.832335
E	0.182635	0.458084	0.365269	0.148703	0.433134	0.730539	0.708583	0.235529	0.0429142	0.310379		E	0.0379242	0	0.123752	0.0618762	0.684631	0.157685	0.39521	0.788423	0.595808	0.0778443		E	0.96507	0.891218	0.467066	0	0.602794	0.0149701	0.0568862	0.0518962	0.000998004	0.00898204		E	1	1	0.992016	0.91517	0.998004	0.194611	0.127745	0.913174	0.893214	0.991018		E	0.148703
D	0.442116	0.60479	0.151697	0.971058	0.00898204	0.993014	0.248503	0.00898204	0.402196	0.0229541		D	0.225549	0.304391	0.156687	0.798403	0.802395	0.404192	0.715569	0.577844	0.00598802	0.712575		D	0.0948104	0.153693	0.131737	0.685629	0.0259481	0.146707	0.0149701	0.129741	0.0219561	0.110778		D	1	0.999002	0.99501	0.562874	0.99501	0.771457	0.964072	0.56986	0.772455	0.219561		D	0.501996
*	0.638723	0.766467	0.174651	0	0	0	0	0	0.0269461	0.0718563		*	0.700599	0.634731	0.738523	0.138723	0.00199601	0	0	0	0	0.0229541		*	0.914172	0.751497	0.605788	0.772455	0.152695	0.00299401	0	0	0	0		*	0.98503	1	1	1	1	1	1	1	1	1		*	0.0918164
[truncated: 8 more columns]

## Sheet: Heatmap for aminoacids in sites
Stop efficiency at the corresponging amino acid residue while located in the ribosome sites							P-values for shuffled datasets exceeding experimental data of stop efficiency at the corresponging triplet while located in the ribosome sites
	Ribosome sites							Ribosome sites
	-2	E	P	A	2			-2	E	P	A	2
W	-0.00812427	-0.00772061	-0.00606279	-0.00787635	-0.00299383		W	0.371257	0.497006	0.50499	1	0.928144
Y	-0.00615776	-0.00716354	-0.00658948	-0.0158075	-0.00419969		Y	0.168663	0.551896	0.649701	1	0.996008
F	-0.0106877	-0.00602185	-0.004622	-0.00606446	0.000651457		F	0.99501	0.108782	0.0928144	1	0.227545
I	-0.0088984	-0.00430052	-0.00119549	-0.0159635	0.000202839		I	0.898204	0.0269461	0.000998004	1	0.483034
L	-0.00900584	-0.00516941	-0.00714324	-0.0174347	-0.00182111		L	0.711577	0	0.555888	1	0.803393
V	-0.00874897	-0.00721707	-0.00429034	-0.00769423	-0.00111423		V	0.633733	0.276447	0.00199601	1	0.628743
M	-0.00734034	-0.00417978	-5.47097e-05	-0.0132302	-0.00337487		M	0.388224	0.0668663	0.00598802	1	0.927146
A	-0.00816625	-0.0092859	-0.0050107	-0.00943604	-0.00176496		A	0.0728543	0.788423	0	1	0.662675
T	-0.0256104	-0.0241471	-0.0103894	0.159873	0.00582298		T	1	1	1	0	0
S	-0.00779317	-0.00793445	-0.00515547	-0.0124768	-0.00133575		S	0.0329341	0.261477	0.00598802	1	0.49002
G	-0.0050358	-0.00489421	-0.00541933	-0.00838215	-0.000588613		G	0	0	0.0528942	1	0.407186
P	-0.0089645	-0.0138323	-0.0161817	-0.0104527	-0.00219643		P	0.502994	1	1	1	0.941118
Q	-0.00591954	-0.00239974	-0.000507732	-0.0144509	0.00115293		Q	0.00499002	0	0	1	0.234531
N	-0.0041867	-0.000497785	-0.00271874	-0.0178146	0.0128803		N	0.00898204	0	0.0898204	1	0
H	-0.00839084	-0.00617581	-0.00664684	-0.009774	0.000239939		H	0.305389	0.0399202	0.411178	1	0.197605
C	-0.00882162	-0.00676678	-0.00744906	-0.0120947	-0.00132395		C	0.541916	0.135729	0.729541	1	0.517964
K	-0.0017186	0.00527411	-0.00379256	-0.0215175	0.0105117		K	0	0	0.476048	1	0
R	-0.00800416	-0.00616367	-0.00477456	-0.0121925	-0.00240051		R	0.0608782	0	0	1	0.987026
E	-0.00653631	-0.00321159	-0.00237581	-0.0106038	0.00912464		E	0.0838323	0	0.00499002	1	0
D	-0.00721461	-0.00708132	-0.00193872	-0.00929763	0.00293832		D	0.165669	0.297405	0	1	0.0179641
*	0	0	0	-0.0300593	0.00679669		*	0	0	0.00199601	1	0.00199601

## Sheet: 2D aminoacid heatmap
2-dimensional representation of stalling propensities with the corresponding aminio acid residue located in the P- and A-sites																							2-dimensional representation of stalling propensities with the corresponding aminio acid residue located in the E- and A-sites																							2-dimensional representation of stalling propensities with the corresponding aminio acid residue located in the E- and P-sites
P\A	Amino acid residues located in the A-site																						E\A	Amino acid residues located in the A-site																						E\P	Amino acid residues located in the P-site
	W	Y	F	I	L	V	M	A	T	S	G	P	Q	N	H	C	K	R	E	D	*			W	Y	F	I	L	V	M	A	T	S	G	P	Q	N	H	C	K	R	E	D	*			W	Y	F
W	-0.0163154	-0.0102166	0.00336637	-0.0396076	-0.0152955	-0.00369783	-0.0251641	-0.00617449	0.145588	-0.00784418	-0.00331193	-0.0137153	-0.0226233	-0.0222471	-0.0168199	-0.0165436	-0.0439338	-0.0136529	0.0109261	-0.0134895	-0.0319953		W	-0.0192602	-0.0108301	0.00156487	-0.0217109	-0.0180751	-0.00281617	-0.0120152	-0.0134587	0.0939383	-0.0148753	-0.00840826	-0.00946729	0.00585352	-0.0012288	-0.0119436	-0.0324154	-0.00263262	-0.0131577	-0.000175585	-0.0282148	-0.0374487		W	0.0152002	-0.00489564	-0.00879485
Y	0.0191333	-0.0114504	0.0134282	-0.0210645	-0.0238043	-0.000740516	-0.0235747	-0.00934447	0.159771	-0.0172043	-0.015886	-0.0105817	-0.0289661	-0.0188603	-0.00617107	-0.0167025	-0.0188902	-0.0220532	-0.028693	-0.0104017	-0.027418		Y	-0.031069	-0.0169096	-0.0128924	0.00828551	-0.0158079	-0.0109334	-0.025841	-0.0183808	0.126178	-0.0133346	-0.00691352	-0.0160261	-0.00752475	-0.0295312	-0.00539345	-0.0258261	-0.0335689	-0.0126436	-0.00750287	-0.0103055	0.00529139		Y	0.00814169	-0.0056052	-0.00197236
F	-0.00272739	0.00293499	-0.00443265	-0.0167522	-0.0154555	-0.00342505	-0.0139645	-0.00683004	0.1268	-0.0130866	-0.00870919	-0.00558669	-0.0114918	-0.0127611	-0.00217456	-0.0142626	-0.0128028	-0.0172605	-0.0162271	-0.0194977	-0.0190091		F	-0.0115868	-0.0127951	-0.0184343	-0.0210229	-0.0197241	-0.0133982	-0.0298969	-0.00859125	0.14669	-0.0152755	-0.0108798	-0.0110123	-0.0208624	-0.00718251	0.00423137	-0.0135231	-0.0338769	-0.00889058	-0.00830642	-0.0123266	-0.0456758		F	-0.0127062	-0.0046953	-0.00462886
I	-0.014547	-0.0193445	-0.0102953	-0.0135177	-0.0280661	-0.015689	-0.0148811	-0.0166444	0.255462	-0.015795	-0.017179	-0.0156896	-0.0115731	-0.0202526	-0.0140008	-0.00421868	-0.0296564	-0.0140606	-0.0154041	-0.0205315	-0.0161224		I	0.00174056	-0.0141277	-0.0112112	-0.016872	-0.0148345	-0.00815264	-0.00502909	-0.00934527	0.172299	-0.0278422	-0.00982794	-0.00762757	-0.00943517	-0.0120915	-0.0124208	-0.0155603	-0.0381245	-0.0162608	-0.0060927	-0.0238924	-0.0241395		I	-0.00724002	-0.00677797	0.0044911
L	-0.00740549	-0.0171025	-0.0161701	-0.0150428	-0.0174056	-0.00856813	-0.0179611	-0.0123813	0.164284	-0.0133081	-0.00870728	-0.00990997	-0.0120557	-0.0227388	-0.0123462	-0.0132896	-0.0164563	-0.0189782	-0.0141908	-0.00963396	-0.0190196		L	-0.00444634	-0.0167422	-0.00727045	-0.0169594	-0.0192577	-0.00505537	-0.0128853	-0.0113845	0.16049	-0.0162084	-0.00930497	-0.0114445	-0.0130572	-0.0169721	-0.0138963	-0.00585978	-0.0166899	-0.0129535	-0.0129444	-0.00270526	-0.0320244		L	-0.00741583	0.0054705	-0.00684638
V	-0.0058298	-0.0205356	-0.00759935	-0.0187655	-0.014621	-0.00587273	-0.0248678	-0.00804655	0.170156	-0.0133387	-0.00632436	-0.00887639	-0.0116749	-0.00980321	-0.0162224	-0.0144843	-0.0232878	-0.0131462	-0.0133131	-0.00663801	-0.0242416		V	-0.00964626	-0.0211622	-0.00842384	-0.0118421	-0.0169845	-0.00591401	-0.010929	-0.01505	0.130002	-0.0107111	-0.00811936	-0.0125247	-0.0185905	-0.012574	-0.0153789	-0.0079246	-0.0173602	-0.0117013	-0.0166979	-0.00415106	-0.0324682		V	-0.00986193	-0.000882205	0.00390029
M	-0.0170734	-0.052599	0.0145219	0.00242545	-0.0181759	-0.00151054	-0.000645822	-0.00289027	0.238518	-0.00949079	-0.00390992	-0.012013	-0.0157744	-0.0458463	-0.0149057	0.000810679	-0.0206761	-0.015939	-0.033222	0.00174616	-0.0142662		M	-0.0189249	-0.00944534	0.0200571	-0.0232448	-0.0246171	-0.000291673	-0.0527191	-0.00261108	0.178913	-0.0158438	-0.00449197	-0.00293666	0.00439361	-0.0276932	-0.014135	-0.0142287	-0.0230169	-0.0196899	-0.000404497	-0.0129527	-0.0650705		M	-0.0152467	0.0194435	-0.000201675
A	-0.011837	-0.0118384	-0.00868237	-0.00765354	-0.0195301	-0.00432317	-0.0109256	-0.00540098	0.116808	-0.0111311	-0.00687142	-0.00941064	-0.0120504	-0.00262711	-0.00848843	-0.0194506	-0.0179444	-0.0108015	-0.00750276	-0.0116431	-0.0430645		A	-0.010974	-0.0194461	-0.00934553	-0.0147124	-0.0158404	-0.0113824	-0.0201009	-0.0117895	0.108672	-0.0112189	-0.0110964	-0.0160832	-0.0115486	-0.0122691	-0.00604328	-0.0165261	-0.0232391	-0.013759	-0.0129625	-0.0153676	-0.0353359		A	-0.00170138	-0.0159212	-0.0110647
T	-0.0132779	-0.0112772	0.000860035	-0.0128918	-0.0162007	-0.00114066	-0.0179468	-0.00739917	0.0291483	-0.0129824	-0.00572138	-0.00795614	-0.00234196	-0.00961412	0.00223927	-0.00808607	-0.0282545	-0.0146522	-0.0196386	-0.000734793	-0.154544		T	-0.0209156	-0.0246764	-0.016634	-0.0331888	-0.0376649	-0.0184065	-0.0169731	-0.0168616	0.00450025	-0.0279752	-0.0213781	-0.0262274	-0.0212546	-0.0361176	-0.0251471	-0.029833	-0.0454002	-0.0263832	-0.0376548	-0.0203412	-0.107246		T	-0.0267516	-0.0221363	-0.0221054
S	-0.00774814	-0.00957861	-0.00542864	-0.0192823	-0.0167576	-0.00766172	-0.0123068	-0.0128949	0.136424	-0.0131208	-0.0074328	-0.00823752	-0.0138	-0.0169036	-0.0101952	-0.00782064	-0.0183051	-0.0128639	-0.00469194	-0.0115	-0.0292631		S	-0.0077434	-0.0165638	-0.00718988	-0.0184956	-0.0166448	-0.00706495	-0.0139789	-0.0102528	0.0952431	-0.00787561	-0.00898244	-0.0143785	-0.00743464	-0.0169583	-0.0107063	-0.0183746	-0.023085	-0.0140775	-0.00504015	-0.0128248	-0.0363572		S	-0.00924359	0.000407376	-0.0104898
G	-0.00898707	-0.0105289	-0.00376579	-0.0164769	-0.0185345	-0.00991217	-0.0165012	-0.00683241	0.0996725	-0.00960992	-0.00471366	-0.00929774	-0.0120323	-0.00453499	-0.0109184	-0.0118467	-0.0172523	-0.00732601	0.00014311	-0.00167713	-0.0265017		G	-0.00163991	-0.0183012	-0.00807138	-0.0135949	-0.010743	-0.00702011	-0.00570648	-0.00790303	0.0951181	-0.00926442	-0.00562429	-0.0152087	-0.0174152	-0.0139669	-0.00245821	-0.0188899	-0.0149243	-0.00570173	-0.0146193	-0.00390639	-0.0173161		G	0.0036679	-0.0160816	-0.00739957
P	-0.017978	-0.0223984	-0.00902475	-0.0191342	-0.0197262	-0.012484	-0.00582933	-0.0151828	0.0841168	-0.0170073	-0.0165508	-0.0316692	-0.021215	-0.0288769	-0.0172026	-0.0262569	-0.0256273	-0.0181747	-0.0153467	-0.0180937	-0.0572299		P	-0.026504	-0.0197639	-0.00672249	-0.0158889	-0.0212541	-0.0106672	-0.0186392	-0.0158292	0.0671481	-0.0172193	-0.01447	-0.0184922	-0.0206474	-0.0252535	-0.0177284	-0.0146601	-0.00740949	-0.0175427	-0.00499331	-0.0204663	-0.0642002		P	-0.00993583	-0.0095449	-0.00718957
Q	-0.00377027	-0.0193025	-0.01058	-0.022214	-0.0193915	-0.00996901	-0.00984945	-0.0210849	0.185217	-0.0110669	-0.00871166	-0.00769585	-0.0183853	-0.0136196	-0.00419545	-0.00679602	-0.0155774	-0.00921429	-0.0176555	-0.0153441	-0.0142986		Q	-0.00775149	-0.0149461	-0.0165506	-0.0162213	-0.0175706	-0.00319125	-0.0144199	-0.00974717	0.159639	-0.0178727	-0.00724639	-0.00752986	-0.0150519	-0.0177806	-0.0151178	-0.00369206	-0.0204562	-0.0115685	-0.00274303	-0.00801678	-0.0411745		Q	-0.0204102	0.0112448	-0.00766301
N	-0.00736712	-0.0307933	-0.0230749	-0.0168335	-0.0130971	-0.00100189	-0.0126368	-0.0142434	0.151968	-0.0146964	-0.0154599	-0.00851596	-0.0174544	-0.022679	-0.0130115	-0.00553317	-0.0182475	-0.0219774	-0.0130259	-0.0136787	-0.0129885		N	-0.0132861	-0.00507028	-0.00520967	-0.0158436	-0.0142182	-0.0151392	-0.0220042	-0.0125426	0.15738	-0.0102565	-0.00464217	-0.0137606	-0.0155388	-0.0190487	-4.05617e-05	-0.0136901	-0.0113391	-0.0177801	-0.0120805	0.00761228	-0.0354167		N	-0.0104363	-0.00375759	0.00461803
H	-0.00989304	-0.0194619	-0.011163	-0.0185791	-0.0129987	-0.00520175	-0.0195919	-0.0117001	0.0938939	-0.0126929	-0.00840651	-0.0123142	-0.0131958	-0.0130828	-0.00828083	-0.0121484	-0.015028	-0.0114148	-0.0122016	-0.00690026	-0.0141159		H	-0.0130375	-0.0024036	-0.00980595	-0.00637683	-0.0192976	-0.0113394	-0.000891247	-0.00954764	0.132222	-0.0144896	-0.0108329	-0.0157022	-0.0131466	-0.0124287	-0.00010219	-0.0184995	-0.0168681	-0.0143768	-0.00172885	-0.0146904	-0.0232504		H	-0.0173036	-0.0260795	-0.00670839
C	-0.0135802	-0.0162578	-0.0107694	-0.0119697	-0.0146246	-0.0130525	0.00208702	-0.0115597	0.125793	-0.0162117	-0.00609206	-0.0131202	-0.0281013	-0.00890339	0.00464793	-0.00319412	-0.00434188	-0.0151192	-0.0106645	0.00155122	-0.0344658		C	-0.0100218	-0.0158691	-0.00160358	-0.00826353	-0.0211646	-0.00525772	-0.00619237	-0.0099879	0.0937724	-0.0154105	-0.0136187	-0.010287	0.00185196	-0.0108952	-0.00612348	0.00178977	-0.0264027	-0.00999453	-0.0209737	-0.000807444	-0.0168258		C	-0.0039889	-0.0196977	0.00877277
K	-0.0134994	-0.0178145	-0.000350314	-0.0123996	-0.0168803	-0.0111269	-0.0121797	-0.00911404	0.176447	-0.0148869	-0.0142409	-0.0126168	-0.0223372	-0.0400277	-0.0227529	-0.0138696	-0.0256025	-0.0173398	-0.0103144	-0.00468908	-0.0285197		K	4.60819e-05	-0.0262074	-0.014611	-0.0123827	-0.0176153	-0.00941724	-0.0152998	-0.0129701	0.233738	-0.0186411	-0.00982706	-0.00946551	-0.00578572	-0.00789281	-0.0025201	-0.0167868	-0.0205975	-0.0179323	-0.0224176	-0.00694163	-0.00954408		K	0.0100301	-0.00244898	-0.00830034
R	-0.00642819	-0.0194518	-0.00902743	-0.0150082	-0.0180301	-0.00962092	-0.020231	-0.0113335	0.172568	-0.0130295	-0.00964044	-0.00924252	-0.0152925	-0.0273605	-0.013848	-0.0146485	-0.0220323	-0.0101815	-0.00957095	-0.015598	-0.0233419		R	-0.00924762	-0.0193207	-0.00695758	-0.0133552	-0.0155098	-0.00689001	-0.0114379	-0.0107625	0.135234	-0.00959823	-0.00790832	-0.010368	-0.0137717	-0.0207383	-0.0136479	-0.0121789	-0.017467	-0.0134673	-0.00288408	-0.00770584	-0.0193506		R	-0.0036656	-0.00690569	-0.0104513
E	-0.00925191	-0.0235768	-0.0232131	-0.0119597	-0.00902989	-0.0148695	-0.0163921	-0.00808714	0.153147	-0.0183334	-0.00707509	-0.00309162	-0.0182384	-0.0151508	0.00144573	-0.00725879	-0.0210576	-0.0112389	-0.0220533	-0.00752142	-0.0200712		E	-0.011739	-0.0180014	-0.0145678	-0.0199394	-0.0179396	-0.00371022	-0.0191952	-0.0103859	0.144721	-0.0145193	-0.00044518	-0.0115676	-0.04125	-0.0150711	-0.00453458	-0.0116092	0.00256267	-0.0140164	-0.0052653	0.0210178	-0.0204335		E	-0.0029003	-0.0174809	-0.0100683
D	-0.0119617	-0.0049041	-0.0148058	-0.0126393	-0.0168857	-0.0068812	0.00229792	-0.0113832	0.144632	-0.0164852	-0.00999406	-0.00364303	-0.0049127	-0.00905107	-0.010044	0.00304575	-0.047392	-0.00977772	-0.00713796	0.00997727	0.00875901		D	-0.00736105	0.00107974	-0.00401118	-0.00743268	-0.0156749	-0.0138617	0.00147311	-0.00906658	0.106574	-0.016584	-0.00862085	-0.0199432	-0.00580585	-0.0101581	-0.0179255	-0.00751112	-0.0280595	-0.0130155	0.000250452	-0.024022	-0.0322879		D	-0.0167163	-0.0153465	-0.0101432
*	N/A	N/A	N/A	N/A	N/A	N/A	N/A	N/A	N/A	N/A	N/A	N/A	N/A	N/A	N/A	N/A	N/A	N/A	N/A	N/A	N/A		*	N/A	N/A	N/A	N/A	N/A	N/A	N/A	N/A	N/A	N/A	N/A	N/A	N/A	N/A	N/A	N/A	N/A	N/A	N/A	N/A	N/A		*	N/A	N/A	N/A
[truncated: 40 more columns]

[truncated: 1 more sheets: P-value 2D aminoacid heatmap]
