# Supplementary material for: Context specificity of translation inhibitors revealed by toe-seq
Source: Research Square preprint supplement (doi:10.21203/rs.3.rs-3832009/v1), 2024-04-03
Supplement: Supplementary file 4 [file 13e3fd5b008b0886f0b9a7f5.xlsx]

## Sheet: Title
Supplementary table 8
Oligonucleotides used for preparation of separate DNA templates or DNA template library. The coding region sequences are underlined. The variable parts are highlighted in bold. The tab “Oligonucleotides for library” contains all oligonucleotides needed for the preparation of the DNA template library. The tab “Oligonucleotides for toe-print” is represented by constant and intermediate primers for …

## Sheet: Oligonucleotides for library
Oligonucleotide type	Oligonucleotides for the former DNA template library preparing	Length (nt)
A forward	5'-GCATTAATACGACTCACTATAGGGTATTTTAATAATTAAACACCGGAGCAACTATGNNNNNNNNNNNNNNNNNNNNNNNNNNNNNNAAACGCGGGAAGGGAAC-3'	103
O forward	5'-GCATTAATACGACTCACTATAGGGATATAAGGAGGAAAACATATGNNNNNNNNNNNNNNNNNNNNNNNNNNNNNNAAACGCGGGAAGGGAAC-3'	92
E forward	5'-GCATTAATACGACTCACTATAGGGAGTTTTATAAGGAGGAAAAAATATGNNNNNNNNNNNNNNNNNNNNNNNNNNNNNNAAACGCGGGAAGGGAAC-3'	96
1 reverse	5'-AAAACGCGTGTTAAATCCATACGGCTGNNNNNNNNNNNNNNNGGTGGGGTTCTGTCGCTTGTTGTTTATGTTCCCTTCCCGCG-3'	83
2 reverse	5'-AAAACGCGTGTTAAATCCATACGGCTGNNNNNNNNNNNNNNNGGCTTCCTGCTTTTGCTTTCTGGTTATGTTCCCTTCCCGCG-3'	83
	Oligonucleotides for PCR amplification of the former DNA templates
T7 TP forward	5'-GCATTAATACGACTCACTATAGGG-3'	24
TP reverse	5'-AAAACGCGTGTTAAATCCATACGG-3'	24
	Oligonucleotide for toe-seq reverse transcription
Cy5-labeled primer	5'-[Cy5]AAAACGCGTGTTAAATCCAT-3'	20
	Oligonucleotide for toe-seq Klenow reaction
MAPT primer	5'-GACTCGAGTCGACATCGA(T)16-3'	34
	Oligonucleotides for final toe-seq PCR aplification
MAP forward primer	5'-GACTCGAGTCGACATCGA-3'	18
final PCR reverse primer	5-CGTGTTAAATCCATACGGCTG-3'	21

## Sheet: Oligonucleotides for toe-print
Oligonucleotide type	Oligonucleotides for DNA template preparing for classic toe-printing assay	Length (nt)
	Constant primers
TSF	5'-ACTAATACGACTCACTATAGGGCTTAAGTATAAGGAGGAAAACATATG-3'	48
TSR	5'-GGTTATAATGAATTTTGCTTATTAACGATAGAATTCTATCACATTCTTGATTCTTATGTTCCCTTCCCGCGTTT-3'	74
T7	5'-GTAATACGACTCACTATAGGG-3'	21
NV1	5'-GGTTATAATGAATTTTGCTTATTAAC-3'	26
	Intermediate primers
Ery1	5'-AAGTATAAGGAGGAAAACATATGGTAACAGCGTCTATTAAAATGTGGCAAGGCAAACGCGGGAAGGGAACATAA-3'	74
Ery2	5'-AAGTATAAGGAGGAAAACATATGCGAGTACGACCCTCGGAAATCGGTGCGGACAAACGCGGGAAGGGAACATAA-3'	74
Ery3	5'-AAGTATAAGGAGGAAAACATATGAGCTTTTGGGCCGCCCGCCCGCCAGGCGTAAAACGCGGGAAGGGAACATAA-3'	74
Ery4	5'-AAGTATAAGGAGGAAAACATATGAGATATTTCCCACGGGCCACCAGTGCGTATAAACGCAGGAAGGGAACATAA-3'	74
TcmX1	5'-AAGTATAAGGAGGAAAACATATGCCGGGCGTCCGCGCCCCTACCACGCGTGTTAAACGCGGGAAGGGAACATAA-3'	74
TcmX2	5'-AAGTATAAGGAGGAAAACATATGCAGGCCCCCCCGCCGGTCGCCTCCCCGTGTAAACGCGGGAAGGGAACATAA-3'	74
TcmX3	5'-AAGTATAAGGAGGAAAACATATGCACAAAAAGGTCATTCACAGGCGGGCCCCGAAACGCGGGAAGGGAACATAA-3'	74
TcmX4	5'-AAGTATAAGGAGGAAAACATATGATTCAGCACGCGAGGGGGCGTGCGCGTCACAAACGCGGGAAGGGAACATAA-3'	74
EtaA1	5'-AAGTATAAGGAGGAAAACATATGGGCATTGTCGCACTCACGCCGAGCCATCGGAAACGCGGGAAGGGAACATAA-3'	74
EtaA2	5'-AAGTATAAGGAGGAAAACATATGACCATGGGGCAACGGTTCCCTGCGGTCCCCAAACGCGGGAAGGGAACATAA-3'	74
EtaA3	5'-AAGTATAAGGAGGAAAACATATGGGCTTAGCCCGGCAGGGCACGGGTCGGCAGAAACGCGGGAAGGGAACATAA-3'	74
EtaA4 = EtaA4_MVVK	5'-AAGTATAAGGAGGAAAACATATGGTGGTTAAGCGAGGGGCGTTCGCCGCGGGGAAACGCGGGAAGGGAACATAA-3'	74

## Sheet: Oligonucleotide for mutagenesis
Oligonucleotide type	Oligonucleotides for DNA template preparing for mutagenesis and toe-printing assay	Length (nt)
	Constant primers
TSF	5'-ACTAATACGACTCACTATAGGGCTTAAGTATAAGGAGGAAAACATATG-3'	48
TSR	5'-GGTTATAATGAATTTTGCTTATTAACGATAGAATTCTATCACATTCTTGATTCTTATGTTCCCTTCCCGCGTTT-3'	74
T7	5'-GTAATACGACTCACTATAGGG-3'	21
NV1	5'-GGTTATAATGAATTTTGCTTATTAAC-3'	26
	Intermediate primers
EtaA4 = EtaA4_MVVK	5'-AAGTATAAGGAGGAAAACATATGGTGGTTAAGCGAGGGGCGTTCGCCGCGGGGAAACGCGGGAAGGGAACATAA-3'	74
EtaA4_MVAK	5'-AAGTATAAGGAGGAAAACATATGGTGGCTAAGCGAGGGGCGTTCGCCGCGGGGAAACGCGGGAAGGGAACATAA-3'	74
EtaA4_MVRK	5'-AAGTATAAGGAGGAAAACATATGGTGCGTAAGCGAGGGGCGTTCGCCGCGGGGAAACGCGGGAAGGGAACATAA-3'	74
EtaA4_MVNK	5'-AAGTATAAGGAGGAAAACATATGGTGAATAAGCGAGGGGCGTTCGCCGCGGGGAAACGCGGGAAGGGAACATAA-3'	74
EtaA4_MVDK	5'-AAGTATAAGGAGGAAAACATATGGTGGATAAGCGAGGGGCGTTCGCCGCGGGGAAACGCGGGAAGGGAACATAA-3'	74
EtaA4_MVCK	5'-AAGTATAAGGAGGAAAACATATGGTGTGTAAGCGAGGGGCGTTCGCCGCGGGGAAACGCGGGAAGGGAACATAA-3'	74
EtaA4_MVQK	5'-AAGTATAAGGAGGAAAACATATGGTGCAAAAGCGAGGGGCGTTCGCCGCGGGGAAACGCGGGAAGGGAACATAA-3'	74
EtaA4_MVEK	5'-AAGTATAAGGAGGAAAACATATGGTGGAAAAGCGAGGGGCGTTCGCCGCGGGGAAACGCGGGAAGGGAACATAA-3'	74
EtaA4_MVGK	5'-AAGTATAAGGAGGAAAACATATGGTGGGTAAGCGAGGGGCGTTCGCCGCGGGGAAACGCGGGAAGGGAACATAA-3'	74
EtaA4_MVHK	5'-AAGTATAAGGAGGAAAACATATGGTGCATAAGCGAGGGGCGTTCGCCGCGGGGAAACGCGGGAAGGGAACATAA-3'	74
EtaA4_MVIK	5'-AAGTATAAGGAGGAAAACATATGGTGATTAAGCGAGGGGCGTTCGCCGCGGGGAAACGCGGGAAGGGAACATAA-3'	74
EtaA4_MVLK	5'-AAGTATAAGGAGGAAAACATATGGTGTTAAAGCGAGGGGCGTTCGCCGCGGGGAAACGCGGGAAGGGAACATAA-3'	74
EtaA4_MVKK	5'-AAGTATAAGGAGGAAAACATATGGTGAAAAAGCGAGGGGCGTTCGCCGCGGGGAAACGCGGGAAGGGAACATAA-3'	74
EtaA4_MVMK	5-'AAGTATAAGGAGGAAAACATATGGTGATGAAGCGAGGGGCGTTCGCCGCGGGGAAACGCGGGAAGGGAACATAA-3'	74
EtaA4_MVFK	5'-AAGTATAAGGAGGAAAACATATGGTGTTTAAGCGAGGGGCGTTCGCCGCGGGGAAACGCGGGAAGGGAACATAA-3'	74
EtaA4_MVPK	5'-AAGTATAAGGAGGAAAACATATGGTGCCTAAGCGAGGGGCGTTCGCCGCGGGGAAACGCGGGAAGGGAACATAA-3'	74
EtaA4_MVSK	5'-AAGTATAAGGAGGAAAACATATGGTGTCTAAGCGAGGGGCGTTCGCCGCGGGGAAACGCGGGAAGGGAACATAA-3'	74
EtaA4_MVTK	5'-AAGTATAAGGAGGAAAACATATGGTGACTAAGCGAGGGGCGTTCGCCGCGGGGAAACGCGGGAAGGGAACATAA-3'	74
EtaA4_MVWK	5'-AAGTATAAGGAGGAAAACATATGGTGTGGAAGCGAGGGGCGTTCGCCGCGGGGAAACGCGGGAAGGGAACATAA-3'	74
EtaA4_MVYK	5'-AAGTATAAGGAGGAAAACATATGGTGTATAAGCGAGGGGCGTTCGCCGCGGGGAAACGCGGGAAGGGAACATAA-3'	74
EtaA4_MAVK	5'-AAGTATAAGGAGGAAAACATATGGCTGTTAAGCGAGGGGCGTTCGCCGCGGGGAAACGCGGGAAGGGAACATAA-3'	74
EtaA4_MRVK	5'-AAGTATAAGGAGGAAAACATATGCGTGTTAAGCGAGGGGCGTTCGCCGCGGGGAAACGCGGGAAGGGAACATAA-3'	74
EtaA4_MNVK	5'-AAGTATAAGGAGGAAAACATATGAATGTTAAGCGAGGGGCGTTCGCCGCGGGGAAACGCGGGAAGGGAACATAA-3'	74
EtaA4_MDVK	5'-AAGTATAAGGAGGAAAACATATGGATGTTAAGCGAGGGGCGTTCGCCGCGGGGAAACGCGGGAAGGGAACATAA-3'	74
EtaA4_MCVK	5'-AAGTATAAGGAGGAAAACATATGTGTGTTAAGCGAGGGGCGTTCGCCGCGGGGAAACGCGGGAAGGGAACATAA-3'	74
EtaA4_MQVK	5'-AAGTATAAGGAGGAAAACATATGCAAGTTAAGCGAGGGGCGTTCGCCGCGGGGAAACGCGGGAAGGGAACATAA-3'	74
EtaA4_MEVK	5'-AAGTATAAGGAGGAAAACATATGGAAGTTAAGCGAGGGGCGTTCGCCGCGGGGAAACGCGGGAAGGGAACATAA-3'	74
EtaA4_MGVK	5'-AAGTATAAGGAGGAAAACATATGGGTGTTAAGCGAGGGGCGTTCGCCGCGGGGAAACGCGGGAAGGGAACATAA-3'	74
EtaA4_MHVK	5'-AAGTATAAGGAGGAAAACATATGCATGTTAAGCGAGGGGCGTTCGCCGCGGGGAAACGCGGGAAGGGAACATAA-3'	74
EtaA4_MIVK	5'-AAGTATAAGGAGGAAAACATATGATTGTTAAGCGAGGGGCGTTCGCCGCGGGGAAACGCGGGAAGGGAACATAA-3'	74
EtaA4_MLVK	5'-AAGTATAAGGAGGAAAACATATGTTAGTTAAGCGAGGGGCGTTCGCCGCGGGGAAACGCGGGAAGGGAACATAA-3'	74
EtaA4_MKVK	5'-AAGTATAAGGAGGAAAACATATGAAAGTTAAGCGAGGGGCGTTCGCCGCGGGGAAACGCGGGAAGGGAACATAA-3'	74
EtaA4_MMVK	5'-AAGTATAAGGAGGAAAACATATGATGGTTAAGCGAGGGGCGTTCGCCGCGGGGAAACGCGGGAAGGGAACATAA-3'	74
EtaA4_MFVK	5'-AAGTATAAGGAGGAAAACATATGTTTGTTAAGCGAGGGGCGTTCGCCGCGGGGAAACGCGGGAAGGGAACATAA-3'	74
EtaA4_MPVK	5'-AAGTATAAGGAGGAAAACATATGCCTGTTAAGCGAGGGGCGTTCGCCGCGGGGAAACGCGGGAAGGGAACATAA-3'	74
EtaA4_MSVK	5'-AAGTATAAGGAGGAAAACATATGTCTGTTAAGCGAGGGGCGTTCGCCGCGGGGAAACGCGGGAAGGGAACATAA-3'	74
EtaA4_MTVK	5'-AAGTATAAGGAGGAAAACATATGACTGTTAAGCGAGGGGCGTTCGCCGCGGGGAAACGCGGGAAGGGAACATAA-3'	74
EtaA4_MWVK	5'-AAGTATAAGGAGGAAAACATATGTGGGTTAAGCGAGGGGCGTTCGCCGCGGGGAAACGCGGGAAGGGAACATAA-3'	74
EtaA4_MYVK	5'-AAGTATAAGGAGGAAAACATATGTATGTTAAGCGAGGGGCGTTCGCCGCGGGGAAACGCGGGAAGGGAACATAA-3'	74
EtaA4_MVVA	5'-AAGTATAAGGAGGAAAACATATGGTGGTTGCTCGAGGGGCGTTCGCCGCGGGGAAACGCGGGAAGGGAACATAA-3'	74
EtaA4_MVVR	5'-AAGTATAAGGAGGAAAACATATGGTGGTTCGTCGAGGGGCGTTCGCCGCGGGGAAACGCGGGAAGGGAACATAA-3'	74
EtaA4_MVVN	5'-AAGTATAAGGAGGAAAACATATGGTGGTTAATCGAGGGGCGTTCGCCGCGGGGAAACGCGGGAAGGGAACATAA-3'	74
EtaA4_MVVD	5'-AAGTATAAGGAGGAAAACATATGGTGGTTGATCGAGGGGCGTTCGCCGCGGGGAAACGCGGGAAGGGAACATAA-3'	74
EtaA4_MVVC	5'-AAGTATAAGGAGGAAAACATATGGTGGTTTGTCGAGGGGCGTTCGCCGCGGGGAAACGCGGGAAGGGAACATAA-3'	74
EtaA4_MVVQ	5'-AAGTATAAGGAGGAAAACATATGGTGGTTCAACGAGGGGCGTTCGCCGCGGGGAAACGCGGGAAGGGAACATAA-3'	74
EtaA4_MVVE	5'-AAGTATAAGGAGGAAAACATATGGTGGTTGAACGAGGGGCGTTCGCCGCGGGGAAACGCGGGAAGGGAACATAA-3'	74
EtaA4_MVVG	5'-AAGTATAAGGAGGAAAACATATGGTGGTTGGTCGAGGGGCGTTCGCCGCGGGGAAACGCGGGAAGGGAACATAA-3'	74
EtaA4_MVVH	5'-AAGTATAAGGAGGAAAACATATGGTGGTTCATCGAGGGGCGTTCGCCGCGGGGAAACGCGGGAAGGGAACATAA-3'	74
EtaA4_MVVI	5'-AAGTATAAGGAGGAAAACATATGGTGGTTATTCGAGGGGCGTTCGCCGCGGGGAAACGCGGGAAGGGAACATAA-3'	74
EtaA4_MVVL	5'-AAGTATAAGGAGGAAAACATATGGTGGTTTTACGAGGGGCGTTCGCCGCGGGGAAACGCGGGAAGGGAACATAA-3'	74
EtaA4_MVVM	5'-AAGTATAAGGAGGAAAACATATGGTGGTTATGCGAGGGGCGTTCGCCGCGGGGAAACGCGGGAAGGGAACATAA-3'	74
EtaA4_MVVF	5'-AAGTATAAGGAGGAAAACATATGGTGGTTTTTCGAGGGGCGTTCGCCGCGGGGAAACGCGGGAAGGGAACATAA-3'	74
EtaA4_MVVP	5'-AAGTATAAGGAGGAAAACATATGGTGGTTCCTCGAGGGGCGTTCGCCGCGGGGAAACGCGGGAAGGGAACATAA-3'	74
EtaA4_MVVS	5'-AAGTATAAGGAGGAAAACATATGGTGGTTTCTCGAGGGGCGTTCGCCGCGGGGAAACGCGGGAAGGGAACATAA-3'	74
EtaA4_MVVT	5'-AAGTATAAGGAGGAAAACATATGGTGGTTACTCGAGGGGCGTTCGCCGCGGGGAAACGCGGGAAGGGAACATAA-3'	74
EtaA4_MVVW	5'-AAGTATAAGGAGGAAAACATATGGTGGTTTGGCGAGGGGCGTTCGCCGCGGGGAAACGCGGGAAGGGAACATAA-3'	74
EtaA4_MVVY	5'-AAGTATAAGGAGGAAAACATATGGTGGTTTATCGAGGGGCGTTCGCCGCGGGGAAACGCGGGAAGGGAACATAA-3'	74
EtaA4_MVVV	5'-AAGTATAAGGAGGAAAACATATGGTGGTTGTTCGAGGGGCGTTCGCCGCGGGGAAACGCGGGAAGGGAACATAA-3'	74
