# Supplementary material for: Context specificity of translation inhibitors revealed by toe-seq
Source: Research Square preprint supplement (doi:10.21203/rs.3.rs-3832009/v1), 2024-04-03
Supplement: Supplementary file 5 [file 3f3022f052bdc82ddc08af91.xlsx]

## Sheet: Title
Supplementary table 5
Ribosome stalling sites, positional, amino acid and codon preferences of ribosome stalling sites, preferences of stalling at combinations of codons and corresponding amino acids in different sites and its significance for translation inhibition by Ery.

## Sheet: Codon heatmap
Stop efficiency at the corresponging triplet in the -2nd position while mRNA codon with specified index number is located in the P-site													Stop efficiency at the corresponging triplet in the E-site while mRNA codon with specified index number is located in the P-site													Stop efficiency at the corresponging triplet in the P-site while mRNA codon with specified index number is located in the P-site													Stop efficiency at the corresponging triplet in the A-site while mRNA codon with specified index number is located in the P-site
-2		Index number of mRNA codon located in the P-site											E		Index number of mRNA codon located in the P-site											P		Index number of mRNA codon located in the P-site											A		Index number of mRNA codon located in the P-site
		4	5	6	7	8	9	10	11	12	13				3	4	5	6	7	8	9	10	11	12				2	3	4	5	6	7	8	9	10	11				1	2	3	4	5	6	7	8	9
P	CCC	-0.00162926	0.000746573	0.00816063	0.0521471	-0.00472508	-0.00956601	-0.0151963	-0.0201673	-0.00659741	-0.00726166		P	CCC	0.00255513	0.00823314	0.00329926	0.00621794	0.0469997	-0.0114786	-0.0215899	-0.0234316	-0.0257973	-0.00676964		P	CCC	-0.00121388	-0.00252487	0.00581899	-0.00167253	0.00132829	0.0439665	-0.0227907	-0.0289134	-0.0280906	-0.0375286		P	CCC	0.0245076	-0.000160394	0.00565728	0.00686887	0.0139253	0.0168598	0.0405128	-0.0164034	-0.0202589
P	CCT	0.00772032	0.00493832	0.0242894	0.0429171	-0.00312682	-0.0120106	-0.0107651	-0.0174591	-0.0042654	-0.00604044		P	CCT	0.00765048	0.00901027	0.018863	0.00842539	0.0527093	-0.00769122	-0.0176667	-0.0203175	-0.0248577	-0.00291111		P	CCT	0.000516903	0.00811305	0.0240774	0.0153215	0.0205242	0.0301405	-0.0132363	-0.0217184	-0.0186015	-0.0336158		P	CCT	0.0172799	0.00555943	0.0041956	0.00780472	0.0117943	0.0200587	0.0557685	-0.01221	-0.0203601
P	CCA	0.0297905	0.013284	0.0160205	0.0460309	0.00120844	-0.0112566	-0.00935135	-0.0150211	0.00034826	-0.00507194		P	CCA	0.0139062	0.0285162	0.0104704	0.00728901	0.0469018	-0.00882366	-0.0251054	-0.0252561	-0.0172319	0.00235286		P	CCA	0.00698821	0.00555092	0.0468304	0.035039	0.0330935	0.0619054	-0.0134992	-0.0294171	-0.0165884	-0.0212697		P	CCA	0.0250478	0.00196983	0.0124487	0.0156801	0.0181225	0.0219029	0.0516079	-0.00596833	-0.0223702
P	CCG	0.0147175	0.00563493	0.00937408	0.0536521	-0.000827563	-0.00699562	-0.0128494	-0.0152504	-0.00527102	-0.00768663		P	CCG	0.00982698	0.00940581	0.012766	0.011265	0.0509814	-0.00933797	-0.021288	-0.0162772	-0.0198809	-0.00779475		P	CCG	0.00689326	0.00906687	0.0293202	0.0137902	0.0178542	0.0429327	-0.0101614	-0.0197917	-0.0236148	-0.0180223		P	CCG	0.0231483	-0.00451804	-0.00118114	0.00686397	0.0088719	0.00714166	0.0478476	-0.00831811	-0.0189499
L	CTC	0.0128335	-0.00122135	0.0194076	0.0541411	-0.00277424	-0.0113006	-0.0158404	-0.0193728	-0.00615014	-0.00985751		L	CTC	0.000230483	0.00512262	0.0175915	0.0239368	0.0571649	-0.00786256	-0.0115365	-0.0127507	-0.0188164	-0.00663452		L	CTC	0.00273827	0.00064523	0.00973577	0.0153638	0.0209975	0.0476617	2.52074e-05	-0.007153	-0.0160891	-0.0288859		L	CTC	0.0145225	0.000489836	0.00371349	0.0162893	0.0226604	0.0211347	0.0668149	-0.000119965	-0.00549725
L	CTT	0.0292612	0.0190475	0.0166441	0.0448406	-0.00415691	-0.0125476	-0.0122307	-0.0244771	-0.00816919	-0.0123638		L	CTT	0.00381163	0.0106471	0.0203593	0.0226847	0.0566156	-0.00901663	-0.0180079	-0.00960701	-0.0223475	-0.00251895		L	CTT	0.00194544	0.00513939	0.0190136	0.0103788	0.0254458	0.0486693	-0.0122743	-0.00235076	-0.0143275	-0.0301642		L	CTT	0.0222195	0.00429538	0.0127109	0.00959453	0.0294995	0.0105332	0.0624699	0.000963551	-0.0144348
L	CTA	0.0143773	0.00673292	0.0128241	0.0532597	-0.00547583	-0.00820923	-0.0137672	-0.00863147	0.000871848	-0.00926595		L	CTA	0.0119399	0.0146599	0.0259164	0.0158519	0.0708128	-0.00208783	-0.00694069	-0.00592523	-0.0154972	-0.00703128		L	CTA	-0.00544275	0.0116641	0.00398083	0.0147825	0.0255515	0.0475605	-0.0012577	-0.0148594	-0.00911982	-0.0135566		L	CTA	0.00189944	0.0098075	0.0297848	0.00499155	-0.0167198	0.0056108	0.0270346	-0.0357822	-0.0265519
L	CTG	0.0159228	0.0256912	0.0165998	0.06024	0.00385942	-0.00686067	-0.0114804	-0.0122521	-0.00264851	-0.0119477		L	CTG	0.00539593	0.0206493	0.0185493	0.0188273	0.052962	0.000128824	-0.0127065	-0.0113346	-0.022312	-0.00558312		L	CTG	0.00864537	0.011759	0.0293047	0.0174608	0.024771	0.0625129	-0.00296306	-0.0023907	-0.0117213	-0.0289704		L	CTG	0.026023	0.00119389	0.00651822	0.017271	0.0119264	0.0234597	0.0629807	-0.00337129	-0.00503387
H	CAC	0.020453	0.0183343	0.015409	0.0608555	-0.0089945	-0.0146568	-0.0161856	-0.0234416	-0.00146541	-0.00381325		H	CAC	0.0146204	0.0191865	0.0289057	0.0199134	0.0604623	-0.00516591	-0.00673316	-0.0150249	-0.027997	-0.00305926		H	CAC	0.026027	0.0159555	0.0209746	0.0252153	0.0261935	0.049701	-0.0038463	-0.00942308	-0.0111898	-0.0237546		H	CAC	0.0318611	0.00853457	0.00121445	0.019236	0.0261968	0.0339028	0.0614413	-7.17454e-05	-0.0088702
H	CAT	0.0235797	0.0213365	0.0106012	0.0575606	-0.0143502	-0.00774713	-0.0230575	-0.0320698	-0.014474	-0.00577215		H	CAT	0.0161946	0.0221909	0.0299633	0.0220233	0.0555242	0.000513991	-0.00800108	-0.0118437	-0.0246938	0.00122987		H	CAT	0.0128388	0.0205454	0.0283914	0.023798	0.0190468	0.0526532	-0.00351983	-0.00754488	-0.00549948	-0.0214376		H	CAT	0.0181759	0.0158912	0.0204306	0.0257573	0.0279145	0.0211594	0.0675035	0.00300072	-0.00570891
Q	CAA	0.028192	0.0217664	0.0369319	0.0486496	0.00144252	-0.0100443	-0.0184977	-0.0142689	-0.00137216	-0.0204079		Q	CAA	0.0163924	0.0189066	0.0284356	0.0266027	0.0777575	-0.00385177	-0.00459913	-0.00363172	-0.00476762	-0.00901787		Q	CAA	0.0174064	0.0219724	0.0285868	0.0330963	0.0211582	0.0520427	-0.00443023	-0.0119751	-0.00808547	-0.00421386		Q	CAA	0.0196976	0.0100522	0.0156357	0.0329259	0.0300545	0.0264631	0.0692143	-0.00308386	-0.00485206
Q	CAG	0.0142917	0.038159	0.030148	0.0767495	0.00023609	-0.0082376	-0.00504399	-0.0148801	0.0115561	-0.0079746		Q	CAG	0.01034	0.0140663	0.0203666	0.0131661	0.0412677	-0.007213	-0.0062881	-0.0011107	-0.0123235	-0.000786842		Q	CAG	0.00332768	0.0171025	0.0195034	0.0181102	0.0169078	0.0622272	-3.26168e-05	-0.0123102	-0.00630398	-0.0188347		Q	CAG	0.0343422	0.00267321	0.00306105	0.0104353	0.0144596	0.0239425	0.0603538	-0.0014035	-0.00375291
R	CGC	0.0174633	0.00456195	0.00787181	0.051934	-0.0102387	-0.013153	-0.0139479	-0.0222727	-0.0138363	-0.00512065		R	CGC	0.0205138	0.016325	0.0190481	0.0180591	0.0647034	0.000297523	-0.00624797	-0.0134999	-0.0293881	-0.0124586		R	CGC	0.015647	0.0101959	0.0115431	0.0217951	0.0232604	0.0611948	-0.00480091	-0.00843733	-0.011997	-0.0193537		R	CGC	0.0210216	0.00487698	0.018434	0.0119746	0.0204652	0.0165908	0.0531646	0.00277077	-0.00563183
R	CGT	0.0136556	0.0125964	0.00872241	0.0527681	-0.015087	-0.012053	-0.0103722	-0.0220621	-0.00691791	-0.0101642		R	CGT	0.0270515	0.029097	0.0220152	0.00999445	0.0516657	0.00153848	-0.00877865	-0.00190619	-0.0360395	-0.0108655		R	CGT	0.0151417	0.0160069	0.0281141	0.0267572	0.0313544	0.0716534	-0.00651245	-0.00482137	-0.00435827	-0.0182891		R	CGT	0.0237837	-0.0034193	0.0155282	0.0205182	0.0230831	0.0253149	0.0651998	0.000541708	-0.00716266
R	CGA	0.0197954	0.0146607	0.00938197	0.0517828	-0.0106337	-0.00981232	-0.0134172	-0.0136283	-0.00506185	0.00496718		R	CGA	0.0247924	0.0136917	0.0192971	0.0201296	0.0441751	-0.00406369	-0.00505145	-0.0143793	-0.0229836	-0.00443693		R	CGA	0.00821487	0.0272661	0.0199702	0.0063504	0.0185709	0.0430325	-0.0172816	-0.0124976	-0.0215787	-0.056809		R	CGA	0.0208425	0.0219346	0.0415914	0.0191741	0.0429837	0.0365908	0.04905	-0.00312039	-0.0157888
R	CGG	0.0195911	0.0115592	0.0202783	0.0662863	-0.00521782	-0.0145776	-0.0128112	-0.0187007	0.000530169	-0.0082563		R	CGG	0.0176544	0.0186827	0.0222514	0.0207226	0.0637759	0.00602186	-0.00487027	-0.00562659	-0.0238515	-7.28877e-06		R	CGG	0.00613858	0.0105926	0.0136851	0.0121218	0.0202314	0.0702972	0.00189603	-0.00292466	-0.011194	-0.0154908		R	CGG	0.0179043	0.00483987	0.019213	0.00906161	0.0127662	0.0144068	0.045999	0.000974751	-0.00888983
S	TCC	-0.00179288	4.83653e-05	0.0138519	0.0643581	-0.00165048	-0.0105062	-0.0148638	-0.0254046	0.000529108	-0.00709436		S	TCC	0.00399988	0.0138275	0.00809963	0.0147485	0.0529854	-0.00619007	-0.0143816	-0.0192135	-0.0227299	-0.00430203		S	TCC	0.000143778	-0.00572059	0.0103732	0.00589825	0.015103	0.0591273	-0.00238172	-0.0132729	-0.0143564	-0.0240399		S	TCC	0.00286753	-0.00366142	0.00459563	0.0105492	0.00666561	0.0147673	0.0636667	-0.000951256	-0.00405893
S	TCT	0.00739571	0.00958227	0.0173068	0.0747666	-0.000255664	-0.00891907	-0.00266753	-0.0244681	-0.0040757	-0.00645721		S	TCT	0.0022783	0.0190553	0.0110216	0.0253248	0.0618805	-0.00463886	-0.00458848	-0.00919612	-0.0121452	-0.00488009		S	TCT	0.0227632	-0.000682445	0.0293989	0.0231345	0.0144384	0.0543374	-0.0070486	-0.00731329	-0.0156706	-0.0211281		S	TCT	0.00743596	0.0013607	0.00219534	0.00981249	0.0210359	0.02725	0.0762527	0.00101812	-0.0064184
S	TCA	0.0221001	0.0165103	0.0334249	0.0551261	-0.00588454	-0.00559062	-0.00607078	-0.0134309	0.000433253	-0.00156805		S	TCA	0.00859152	0.0393084	0.0255162	0.0191715	0.0590752	7.34875e-05	-0.0133262	-0.0117573	-0.0134869	-0.00932356		S	TCA	0.0108771	0.00721095	0.0260441	0.0182381	0.0206657	0.0625683	-0.000778376	-0.0131974	-0.0111262	-0.0225303		S	TCA	0.0200874	-0.000778887	0.0101085	0.0246032	0.0162229	0.0298607	0.0574676	-0.00579849	-0.00908042
S	TCG	0.0201042	0.0168406	0.022489	0.0534574	-0.00748864	-0.00435811	-0.0127472	-0.0173386	-0.000996609	-0.00909258		S	TCG	2.61213e-05	0.0119777	0.00666023	0.020095	0.0522123	-0.00210759	-0.00862495	-0.0137086	-0.0120762	-0.00657419		S	TCG	-0.0108238	0.0139349	0.00898765	0.0103368	0.0225607	0.0607451	0.00283967	-0.00899792	-0.00890366	-0.0193876		S	TCG	0.0214924	0.0103567	0.0120051	0.0150741	0.0122971	0.015121	0.0503756	-0.00763637	-0.00918148
F	TTC	0.00299807	0.0117358	0.026238	0.0447759	0.000994932	-0.00544112	-0.0161494	-0.0224578	-0.00159925	-0.00568346		F	TTC	-0.00230705	0.00987004	0.0120633	0.0172872	0.0525245	-0.0041188	-0.00853544	-0.00809449	-0.0124404	0.000173915		F	TTC	-0.00479924	0.0171372	0.0194945	0.0247156	0.0252153	0.0719386	0.00027002	-0.00589735	-0.0205922	-0.0163568		F	TTC	0.00602386	0.00294449	-0.00197445	0.017389	0.0244456	0.0166807	0.0853599	0.00229819	-0.00297874
F	TTT	0.0167187	0.0249082	0.0248113	0.0545117	0.002427	-0.0099092	-0.0112931	-0.0145841	0.010271	-0.0110463		F	TTT	0.00722722	0.0161674	0.0250277	0.031578	0.0749334	0.00337599	-0.00265525	-0.0103633	0.0015141	0.00658169		F	TTT	0.00850934	0.0119055	0.0230071	0.0289882	0.0290993	0.0731718	-9.53948e-05	-0.00634418	-0.0235618	-0.0196495		F	TTT	0.0340944	0.00957516	0.00259818	0.0299443	0.0290293	0.0305082	0.0513805	0.00955137	-0.0091957
L	TTA	0.0221312	0.0235225	0.0244891	0.074122	-0.00467849	-0.00191891	-0.00680246	-0.0203321	0.00321986	-0.0154947		L	TTA	0.00913548	0.022003	0.0154904	0.0252055	0.0729076	0.00100259	-0.0194702	-0.014095	-0.0274373	0.0019216		L	TTA	0.00909971	0.0275123	0.0335055	0.0316983	0.053242	0.0890985	-0.00602485	-0.0178483	0.00719707	-0.0185426		L	TTA	0.0206188	0.0175094	-0.00831963	0.00191435	-0.00926955	0.032842	0.0683608	-0.00845383	-0.0140604
L	TTG	0.0281248	0.0185596	0.0281401	0.0628372	-0.00144623	-0.00665126	-0.00424414	-0.0181594	-0.00423091	-0.00414605		L	TTG	0.00984533	0.0238134	0.0229609	0.00927918	0.0603596	0.00159264	-0.00881467	-0.00801181	-0.00893363	0.00135629		L	TTG	-0.00530949	0.0136661	0.0259661	0.0395652	0.0303103	0.0817119	0.00337775	-0.00659827	0.00125547	-0.0110565		L	TTG	0.00280588	0.0061424	-0.00200802	0.0141222	0.0220121	0.0202777	0.0541458	0.00158024	-0.00976558
Y	TAC	0.0273851	0.0448837	0.02692	0.071542	0.00221374	-0.00594617	-0.0100645	-0.010575	-0.00270893	-0.0013547		Y	TAC	0.0133367	0.0208131	0.0292804	0.0244955	0.0576655	-0.0020845	-0.0100048	-0.00854194	-0.0126529	-0.0123133		Y	TAC	0.014198	0.012513	0.0360763	0.0362781	0.0331242	0.051189	0.00506198	-0.0188086	0.000569758	-0.0219339		Y	TAC	0.0120467	0.0143883	0.00940521	0.0182513	0.0286198	0.0282397	0.0577357	-0.00975875	-0.00386065
Y	TAT	0.0291626	0.0445169	0.0365639	0.0637329	0.000630285	-0.000948722	-0.00427109	-0.0167889	-0.000184353	-0.00990917		Y	TAT	0.0146695	0.0301357	0.0203114	0.0287144	0.0424242	0.00472887	-0.00746402	-0.00819267	-0.0260858	-0.00602751		Y	TAT	0.00236869	0.0137801	0.0201076	0.0203034	0.0311655	0.0399507	-0.00851562	-0.00827271	-0.0055171	-0.0424396		Y	TAT	0.0267926	0.0103881	0.0197793	0.0419909	0.0100709	0.050368	0.0560726	-0.0127269	-0.00459491
*	TAA	0	0	0	0	0	0	0	0	0	0		*	TAA	0	0	0	0	0	0	0	0	0	0		*	TAA	0	0	0	0	0	0	0	0	0	0		*	TAA	-0.0335929	-0.0368439	-0.00530636	0.0718024	0.0445752	0.0370742	0.0957647	0.0114832	-0.0274583
*	TAG	0	0	0	0	0	0	0	0	0	0		*	TAG	0	0	0	0	0	0	0	0	0	0		*	TAG	0	0	0	0	0	0	0	0	0	0		*	TAG	-0.0327852	-0.00823162	-0.00225082	0.0538315	0.0492826	0.0325217	0.0610514	0.00247022	-0.0211698
C	TGC	0.0117978	0.00662289	0.0301099	0.0537692	-0.00121946	-0.00783736	-0.00880266	-0.0206378	-0.00547318	-0.0017292		C	TGC	0.00398724	0.0200291	0.0110893	0.0260442	0.0610056	0.0012045	-0.00573725	-0.0129434	-0.0124708	-0.00269372		C	TGC	0.000678242	0.00434074	0.0262806	0.0215469	0.0307836	0.0624223	-0.00308106	-0.00461507	-0.00696315	-0.01992		C	TGC	0.0234723	0.000848164	0.00272926	0.0139125	0.0025926	0.0188082	0.065314	-0.00245898	-0.0164464
C	TGT	0.0268362	0.0204157	0.025775	0.0584318	-0.00747659	-0.00629487	-0.00553874	-0.0113643	0.00412737	-0.0093657		C	TGT	0.00182818	0.018193	0.0167486	0.0192978	0.0547535	0.00181886	-0.0109757	-0.00758003	-0.00393994	-0.000258339		C	TGT	0.000591164	0.0110783	0.0285193	0.00974076	0.0314369	0.0837545	-0.0109825	-0.00170088	-0.0178777	-0.0108712		C	TGT	0.0144316	0.00290059	0.00768679	0.00907082	0.00643939	0.0105505	0.0462319	-0.00963286	-0.015279
*	TGA	0	0	0	0	0	0	0	0	0	0		*	TGA	0	0	0	0	0	0	0	0	0	0		*	TGA	0	0	0	0	0	0	0	0	0	0		*	TGA	-0.0248235	-0.0308824	0.020029	0.0145508	0.01421	-0.0032253	0.0310896	-0.0329255	-0.0306765
W	TGG	0.0177954	0.0279248	0.0250057	0.0547888	0.00407004	-0.00359213	-0.00835731	-0.0152525	0.00348901	-0.00810686		W	TGG	0.00185676	-0.00132493	0.0115216	0.0239179	0.0629407	0.00576464	-0.00681993	0.00094186	-0.0135188	0.00536321		W	TGG	-0.0096139	0.00678324	0.0211436	0.0137916	0.0239917	0.0648508	-0.00190713	-0.00135931	-0.00718469	-0.0157176		W	TGG	0.0191035	0.0120168	0.0215207	0.0481431	0.0128243	0.0275615	0.0728525	0.00157529	0.00199693
T	ACC	0.0176141	0.0105297	0.0248547	0.0536656	-0.00703432	-0.00540196	-0.0170979	-0.0217584	-3.72478e-05	-0.00781959		T	ACC	0.0164785	0.0109574	0.0326257	0.0293855	0.0564258	0.00512943	-0.00585163	-0.0119845	-0.0204497	-0.00214973		T	ACC	0.00166768	0.0184651	0.0214003	0.0178136	0.0229047	0.0558837	-0.00680871	-0.00341183	-0.0139053	-0.0199861		T	ACC	0.0234176	0.00910604	0.00597313	0.0203061	0.018151	0.0153994	0.0701001	-0.00446549	-0.00634498
T	ACT	0.0123552	0.0369467	0.0325578	0.0571699	0.00281027	-0.00905596	-0.0152261	-0.01917	-0.0107106	-0.00474173		T	ACT	0.0140322	0.0258005	0.0381046	0.0261678	0.0441376	-0.00742789	-0.00636245	-0.00199102	-0.0104258	0.000807667		T	ACT	-0.00130341	0.00944869	0.0233249	0.0106264	0.0119075	0.0609488	-0.00602216	0.00160949	-0.00533462	-0.0213179		T	ACT	0.0231586	0.00719091	0.010818	0.0220008	0.0166746	0.0116399	0.0630162	0.000591483	-0.0106957
T	ACA	0.0242255	0.0354162	0.033659	0.0486098	-0.00401186	-0.0126709	-0.01025	-0.0229682	0.0117297	-0.0123027		T	ACA	0.0215745	0.0284312	0.0236304	0.0248819	0.0631127	-0.00723552	-0.00611093	-0.00176565	-0.0077348	-0.00729623		T	ACA	0.00503725	0.0246294	0.0290439	0.0259438	0.0184766	0.0562501	-0.000363726	-0.00556992	-0.00671619	-0.00948449		T	ACA	0.0192345	0.0248851	0.0124098	0.0239374	0.0234214	0.0244489	0.0394544	-0.0165102	-0.0185674
T	ACG	0.0338258	0.0257193	0.0344538	0.0594525	-0.0014296	-0.00496402	-0.0130835	-0.0132615	8.81238e-05	-0.00290177		T	ACG	0.00949986	0.0264804	0.0278324	0.0272743	0.0561976	0.00371368	-0.00624605	-0.00521489	-0.0181802	-0.0055955		T	ACG	0.020651	0.00959028	0.0211305	0.0119948	0.0146449	0.0591897	-0.00116863	-0.0110387	-0.013663	-0.00629318		T	ACG	0.016948	0.00845073	0.0123423	0.0161324	0.0176079	0.0219796	0.0569612	-0.0100931	-0.0171279
I	ATC	0.0267388	0.0359931	0.0370701	0.0667818	-0.0103012	-0.0103794	-0.0011574	-0.0331449	-0.00645196	-0.0109187		I	ATC	0.0136792	0.0373792	0.0363125	0.0368817	0.0789928	-0.00267509	3.85968e-05	-0.0102429	-0.0122581	0.00032547		I	ATC	0.00847424	0.0167144	0.0304623	0.0361272	0.0295802	0.0717535	-0.00345844	-0.00027491	-0.00436677	-0.00164515		I	ATC	0.0174287	0.0097174	0.0123914	0.0142702	0.0221783	0.0271905	0.0655447	0.00870585	0.00433138
I	ATT	0.0334678	0.0364938	0.0397176	0.0774331	0.00766785	-0.00738387	-0.00230895	-0.0178498	-0.0123748	-0.00825656		I	ATT	0.00675912	0.0248273	0.0234642	0.0506673	0.0695394	0.00421588	-0.0107945	-0.00283767	-0.0323986	0.000212811		I	ATT	-0.00121418	0.0126758	0.022989	0.0290661	0.0293395	0.0664295	0.00951014	0.00500084	-0.012537	-0.00637201		I	ATT	0.0145895	0.0239094	0.0117836	0.0381769	0.0445027	0.0401706	0.0724113	-0.00145962	-0.000954538
I	ATA	0.0397991	0.0290177	0.0287207	0.0442697	-0.0017049	-0.00207643	-0.00602624	-0.0292582	0.00372082	-0.00732879		I	ATA	0.0154175	0.0310296	0.00370117	0.0352578	0.0796405	0.00426179	-0.00851274	-0.00329236	-0.00239063	-0.00870123		I	ATA	-0.000279452	0.0129679	0.0315082	0.0219903	0.0393746	0.0624285	0.00712477	-0.00299096	0.00284107	-0.0118837		I	ATA	0.0268778	0.0318072	0.0335423	0.0358476	0.0221921	0.0146001	0.0670961	-0.0174617	-0.0200603
M	ATG	0.0351998	0.0353301	0.0370524	0.0583795	0.000143832	0.00321929	-0.0130382	0.00372102	0.0112226	-0.0153553		M	ATG	0.0060854	0.0186332	0.036411	0.0292135	0.0507991	-0.00216185	-0.00377599	-0.00936245	-0.00709287	-0.00200052		M	ATG	0.0196953	0.00480584	0.027245	0.0378008	0.0387832	0.071575	0.0127153	0.0010455	-0.00297177	-0.015454		M	ATG	0.0175513	-0.00191795	0.00614003	0.0250896	0.0211832	0.030346	0.0638137	0.0019772	-0.00107089
N	AAC	0.0313138	0.0405566	0.0261208	0.0511045	-0.0114509	-0.0107861	-0.00263544	-0.0308034	-0.00354119	-0.00652914		N	AAC	0.0160101	0.0264134	0.031483	0.0321645	0.0514353	0.00133267	-0.00503802	-0.0126262	-0.0133949	-0.00355983		N	AAC	-0.00842769	0.0136504	0.024535	0.0294023	0.0264518	0.0728415	0.00291893	-0.00211372	-0.0145773	-0.0130581		N	AAC	0.0232367	0.0075226	0.0181562	0.0324857	0.0381049	0.0255382	0.0690334	0.00134001	0.000252152
N	AAT	0.0274695	0.026304	0.0240408	0.0592097	-0.00108652	-0.0110474	-0.00545999	-0.0067793	-0.0119426	-0.0156058		N	AAT	0.0110535	0.0301962	0.0247519	0.0166887	0.056317	-0.00267923	-0.00521323	0.00357826	-0.00741396	0.00494474		N	AAT	0.00564841	0.00803068	0.0271731	0.0165469	0.0163248	0.0572054	0.00394627	0.00171405	-0.005102	-0.0135394		N	AAT	0.0279241	0.0147313	0.0464546	0.0525907	0.0224514	0.0399433	0.0522496	-0.0135143	-0.0227952
K	AAA	0.0363574	0.0252288	0.029305	0.055306	0.00158399	-0.0183251	-0.0194362	-0.0229417	0.00875944	-0.0150585		K	AAA	0.032634	0.0634309	0.0396204	0.0358967	0.0589998	-0.00221582	0.0032491	-0.0028753	-0.019396	-0.00204366		K	AAA	0.0052403	0.0354388	0.0221207	0.0348719	0.0401492	0.0630925	0.00820791	-0.0136759	-0.00987259	-0.00777171		K	AAA	0.0290384	0.0231387	0.0494944	0.0542572	0.0445626	0.0425149	0.0670776	0.017743	-0.0149843
K	AAG	0.0348914	0.028161	0.0147895	0.0464225	-0.000821415	-0.00703064	-0.0110134	-0.0164996	0.00150417	-0.0107387		K	AAG	0.0338151	0.0499135	0.0303005	0.0201847	0.0533566	-0.00594389	-0.00282343	-0.00527655	-0.0156456	0.000444739		K	AAG	-0.00557847	0.00606802	0.0171521	0.0106647	0.0107455	0.056917	-0.00525077	-0.00408223	-0.00871343	-0.0204635		K	AAG	0.0228233	0.0185378	0.0569072	0.034486	0.0394395	0.0343744	0.0577218	0.0066068	-0.00280553
S	AGC	0.0214654	0.00944568	0.0170344	0.0558009	0.00117467	-0.0117426	-0.0119108	-0.0189585	-0.00414944	-0.00764507		S	AGC	0.00794989	0.020943	0.0203119	0.0181259	0.053198	-0.00739338	-0.00808052	-0.00387273	-0.00857196	0.00114084		S	AGC	0.0215985	0.011614	0.0190834	0.00806251	0.0180874	0.0533187	-0.00196447	-0.0105017	-0.0140272	-0.0257152		S	AGC	0.00937506	-0.00896657	0.00864583	0.0209415	0.0245658	0.0210157	0.0575216	0.00709736	-0.00465322
S	AGT	0.0181769	0.019395	0.00846338	0.0650161	0.00229693	-0.00698349	-0.00500558	-0.00603994	-0.00222365	-0.00419257		S	AGT	0.00616185	0.00681228	0.0206214	0.0232574	0.0484717	-0.00694752	-0.00656208	-0.0124626	-0.0024575	0.00370311		S	AGT	0.00333259	0.0180642	0.013454	-0.000622625	0.0191931	0.0460596	0.00139573	-0.0157423	-0.00322673	-0.0145988		S	AGT	0.017332	0.0178446	0.0212506	0.0274438	0.0203656	0.0034334	0.0407044	-0.0197828	-0.0277067
R	AGA	0.0254632	0.020057	0.00477623	0.0428316	-0.00609864	-0.0191193	-0.00335366	-0.00895019	-0.00394191	-0.0124165		R	AGA	0.0525813	0.0270333	0.0196159	0.0374475	0.0580438	0.000602884	-0.00309528	-0.00703607	-0.0148363	0.0084551		R	AGA	0.000809225	0.0153416	0.0116212	0.0228084	0.0155681	0.0515055	-0.00283557	-0.0026385	-0.0154146	-0.0187389		R	AGA	0.0248873	0.0604826	0.0856845	0.0361829	0.0319742	0.0293753	0.0463579	-0.0461658	-0.0283106
R	AGG	0.0225384	0.0140112	0.0109919	0.0421226	-0.0133571	-0.012848	-0.0140571	-0.0166459	1.747e-05	-0.00188175		R	AGG	0.0314126	0.0226325	0.0178581	0.0206884	0.0592273	-0.00346657	0.00421644	-0.00945455	-0.0115454	-6.85746e-06		R	AGG	0.0011765	0.00463348	0.0224341	0.0186515	0.0219692	0.0668804	-0.000992034	-0.00412752	-0.00963383	-0.0181525		R	AGG	0.00688522	0.0360116	0.052035	0.0315279	0.0263688	0.0129894	0.0627833	-0.0145331	-0.0145556
A	GCC	0.00691348	0.00893016	0.0121284	0.057207	-0.00519175	-0.0124418	-0.0146923	-0.0173757	-0.0018561	-0.00983616		A	GCC	0.00159406	0.011874	0.0122638	0.0180281	0.0537842	-0.00432801	-0.0116276	-0.0188282	-0.0209214	-0.00127976		A	GCC	0.00166501	0.00485332	0.0126221	0.0111089	0.0116006	0.0540647	-0.000549758	-0.00646589	-0.00869882	-0.00690775		A	GCC	0.0177761	0.00271313	0.000861025	0.0118769	0.015542	0.0201737	0.0508282	0.000904358	-0.00772904
A	GCT	0.0109838	0.0272559	0.0149267	0.0637012	-0.0044011	-0.0149162	-0.0137959	-0.0199123	-0.00468052	-0.005421		A	GCT	0.0163144	0.0124139	0.00372592	0.0226599	0.0719805	-0.00565758	-0.00924402	-0.0155023	-0.0212309	-0.00364525		A	GCT	-0.00211892	0.0093961	0.0172492	0.0156607	0.00197682	0.0606904	9.66117e-05	-0.00443188	-0.0101078	-0.0192056		A	GCT	0.0126001	-0.00111823	0.00426507	0.00866934	0.020238	0.0249535	0.0793021	0.00077045	-0.00385552
A	GCA	0.0216135	0.0269292	0.0191955	0.0515172	0.00410501	-0.00166757	-0.00504129	-0.0160049	0.000892736	-0.00930454		A	GCA	0.00579351	0.0252095	0.00641914	0.0255694	0.0641407	-0.0054411	-0.0107728	-0.00602811	-0.0121929	0.00360881		A	GCA	0.0116545	0.0178389	0.0180501	0.0278904	0.0222315	0.0505711	0.00416592	-0.00722988	-0.00403799	-0.013192		A	GCA	0.0279431	0.0013688	0.0132826	0.0232391	0.0139121	0.0260494	0.0627956	-0.00404114	-0.00805836
A	GCG	0.011517	0.0126595	0.0253916	0.0547112	0.0018106	-0.00378303	-0.00595793	-0.0153807	-0.00228086	-0.00352537		A	GCG	-0.000375432	0.00965082	0.014002	0.0192304	0.0625022	-0.00792364	-0.00937738	-0.00852854	-0.0220268	-0.00143242		A	GCG	-0.000465047	0.001527	0.0126435	0.0206939	0.0170266	0.0564374	-0.00466016	-0.00719684	-0.010271	-0.0125335		A	GCG	0.0169842	0.00521351	0.00188525	0.0184833	0.0142113	0.0100976	0.0601358	-0.00195108	-0.00956787
V	GTC	0.0143553	0.0240118	0.0203301	0.0566964	0.00200861	-0.00790835	-0.0146491	-0.0104159	-0.0125985	-0.00721042		V	GTC	-0.00136938	0.0187471	0.0243014	0.0308266	0.0611524	0.000795005	-0.00122956	-0.00486417	-0.00852643	-0.00365895		V	GTC	0.0113781	0.0108309	0.0150271	0.0272319	0.0201166	0.0566403	-0.00373202	-0.00317404	-0.0128904	-0.0110052		V	GTC	0.0199181	-0.000942769	0.00188105	0.0149146	0.0106174	0.0192764	0.0763342	0.00207388	0.00178282
V	GTT	0.023038	0.0259497	0.0136271	0.0707852	-0.0127543	-0.00940593	-0.00886515	-0.025808	-0.00837177	-0.00579939		V	GTT	0.00111328	0.0231526	0.0179103	0.034425	0.0741502	-0.000133589	0.001686	-0.00588203	-0.022271	-0.00856709		V	GTT	0.00144264	0.00258797	0.0161151	0.0266751	0.0294519	0.0677471	0.00864112	-0.000841583	-0.00634425	-0.0222304		V	GTT	0.0169738	0.00231127	0.0081339	0.0179211	0.031502	0.0218121	0.0704823	0.00731065	-0.00179646
V	GTA	0.0252213	0.0301504	0.0477355	0.069213	0.00682152	-0.0105719	0.00291263	-0.0200478	0.00184032	-0.00629308		V	GTA	0.00017408	0.0325217	0.0228497	0.0369946	0.0707846	0.00766776	0.00251845	0.00232541	-0.00686836	-0.00158355		V	GTA	0.010051	0.024165	0.0249232	0.0482294	0.0353484	0.0628121	0.0126197	-0.000160133	-0.00416267	-0.00614532		V	GTA	0.0298498	0.0165802	-0.00657325	0.0113507	0.0251221	0.0145017	0.0663986	0.0088479	-0.000165345
V	GTG	0.0219443	0.0272792	0.0323372	0.0628438	-0.00335191	-0.00688832	-0.0172968	-0.0121386	-0.00673099	-0.00236387		V	GTG	0.000138022	0.0194396	0.0301767	0.0241344	0.0722997	0.00933023	0.00409034	0.000949895	-0.0157233	-0.00284985		V	GTG	-0.0067037	0.0111282	0.0119086	0.0175552	0.029032	0.0663586	0.00755841	-0.00295984	-0.00475269	0.000225896		V	GTG	0.0150672	-0.00273965	0.00884506	0.0165158	0.0168443	0.0401476	0.060468	0.00336021	0.00226566
D	GAC	0.0163967	0.0245873	0.0333658	0.03874	-0.00313283	-0.00960737	-0.00559082	-0.00846005	0.00155007	-0.00220352		D	GAC	-0.0039758	0.0136548	0.0259993	0.0296095	0.0439386	0.00205936	-0.00502614	-0.0167044	-0.0122402	-0.00373101		D	GAC	0.00192388	0.0123141	0.0177908	0.0213625	0.0304539	0.0633703	0.00674996	-0.0090325	-0.00830267	-0.00663486		D	GAC	0.00358239	-0.00115931	0.00400125	0.0217683	0.0142233	0.0230445	0.0597819	-0.00208458	-0.00734823
D	GAT	0.0177667	0.0265981	0.0144505	0.046604	0.00697303	-0.0156012	-0.0105944	-0.00774587	0.00430006	-0.00148884		D	GAT	0.00629631	0.0205519	0.0275576	0.0141979	0.0591396	0.0021326	-0.00938462	-0.00433975	-0.00966806	0.00376695		D	GAT	0.0130434	0.00702247	0.0306302	0.0141473	0.0213694	0.0527154	-0.00626746	0.000761823	-0.0029681	-0.0078136		D	GAT	0.00917087	-0.0021752	-0.00318739	0.0261603	0.0281762	0.0303548	0.0472406	-0.00827857	-0.00295839
E	GAA	0.0244384	0.0337938	0.0214422	0.0511943	0.00600792	-0.00681347	-0.00975592	-0.0153958	0.0022567	-0.0182861		E	GAA	0.00545131	0.043114	0.0302024	0.0370801	0.0399284	-0.0078776	-0.00872825	-0.0030467	-0.0087305	-0.00232354		E	GAA	-0.00776206	0.00856904	0.0160011	0.0358346	0.0020749	0.0642285	-0.00319366	-0.00281293	-0.0106593	-0.0055199		E	GAA	0.0186025	-0.00883081	0.0147083	0.0304439	0.0358078	0.0394552	0.070288	-0.0136741	-0.00319646
E	GAG	0.0115046	0.0136072	0.0161502	0.0598036	-0.00842247	-0.0149615	-0.01164	-0.0201659	0.00211854	-0.0113321		E	GAG	0.013941	0.0195513	0.0234236	0.0281897	0.0463365	-0.00384825	-0.00637015	-0.009905	-0.0223767	0.00305867		E	GAG	-0.0114488	0.00371281	0.00443939	0.00610194	0.00730817	0.068364	-0.00361025	-0.012418	-0.00122205	-0.00869962		E	GAG	0.00117209	-0.00249875	0.00159102	0.0270577	0.0271145	0.0318983	0.0620233	3.20375e-05	-0.0128716
G	GGC	0.0183633	0.0125885	0.0258115	0.0557399	-0.00143134	-0.0078141	-0.0127096	-0.0157656	0.000740623	-0.00367936		G	GGC	0.00672052	0.0193505	0.0113995	0.0092573	0.0614415	-0.00777877	-0.012648	-0.0135056	-0.0104807	0.000320751		G	GGC	-0.00302182	0.00724714	0.0102634	0.0298521	0.0291004	0.0695961	0.00101763	-0.00126007	-0.00427838	-0.00922008		G	GGC	0.00650088	-0.00553138	0.00149941	0.0198641	0.0180862	0.0184126	0.0622486	0.00337416	-0.00319858
G	GGT	0.00850814	0.0247992	0.0164083	0.0486812	0.00100378	-0.00292658	-0.00624509	-0.0174435	-0.00155953	-0.00271789		G	GGT	0.00227062	0.00436767	0.0113009	0.00653707	0.0592924	-0.00443346	-0.0160474	-0.0125358	-0.0156608	0.00535885		G	GGT	0.00104592	0.00333003	0.00746858	0.0175269	0.0267642	0.0680392	0.00879517	-0.00921492	-0.00701772	-0.0132967		G	GGT	0.00773073	-0.00620465	-0.0084466	0.0215359	0.00938617	0.00862759	0.0715589	0.00181345	-0.00858673
G	GGA	0.0206808	0.0242282	0.025039	0.0512309	-0.00594362	-0.00563976	-0.00546519	-0.0127804	-0.00721524	-0.00454164		G	GGA	0.000398541	0.0135288	0.0127809	0.0264944	0.0523805	-0.00804589	-0.0124344	0.00114701	-0.00929635	0.00404214		G	GGA	0.00121443	0.00802468	0.00901992	0.0185572	0.033001	0.0553968	-0.00224976	-0.00948463	-0.00398409	-0.00400647		G	GGA	0.0108841	-0.00537537	-0.00287596	0.0168532	0.0371748	0.0272817	0.0628887	0.00118054	-0.00952493
G	GGG	0.0102112	0.0167557	0.0187516	0.0664257	0.00113123	-0.00875325	-0.00917532	-0.0133136	0.00885532	-0.0019329		G	GGG	0.00391662	-0.000405407	0.0131648	0.0206041	0.0606254	0.000828211	-0.00857321	-0.01341	-0.0103557	0.0164088		G	GGG	-0.00327434	0.00613037	0.0125753	0.0168314	0.0157638	0.0688982	0.00150286	-0.009855	-0.00498279	-0.00836531		G	GGG	0.00463381	-0.00649538	-0.00150338	0.00789377	0.0133983	0.0196987	0.0448776	0.00399043	-0.00509204
[truncated: 12 more columns]

## Sheet: P-value for codon heatmap
P-value for shuffled datasets exceeding experimental data of stop efficiency at the corresponging triplet in the -2nd position while mRNA codon with specified index number is located in the P-site													P-value for shuffled datasets exceeding experimental data of stop efficiency at the corresponging triplet in the E-site while mRNA codon with specified index number is located in the P-site													P-value for shuffled datasets exceeding experimental data of stop efficiency at the corresponging triplet in the P-site while mRNA codon with specified index number is located in the P-site													P-value for shuffled datasets exceeding experimental data of stop efficiency at the corresponging triplet in the A-site while mRNA codon with specified index number is located in the P-site
-2		Index number of mRNA codon located in the P-site											E		Index number of mRNA codon located in the P-site											P		Index number of mRNA codon located in the P-site											A		Index number of mRNA codon located in the P-site
		4	5	6	7	8	9	10	11	12	13				3	4	5	6	7	8	9	10	11	12				2	3	4	5	6	7	8	9	10	11				1	2	3	4	5	6	7	8	9
P	CCC	1	1	1	0.844467	0.830508	0.587238	0.966102	0.874377	0.977069	0.653041		P	CCC	0.995015	1	1	1	0.997009	1	1	1	0.998006	0.971087		P	CCC	0.951147	1	1	1	1	1	1	1	1	1		P	CCC	0.00498504	0.866401	0.939182	0.999003	0.931206	0.900299	1	1	1
P	CCT	0.989033	1	0.218345	0.979063	0.527418	0.854437	0.422732	0.549352	0.724826	0.422732		P	CCT	0.713858	0.971087	0.472582	0.985045	0.716849	0.922233	0.998006	0.995015	0.968096	0.549352		P	CCT	0.757727	0.647059	0.105683	0.750748	0.508475	1	0.997009	1	0.986042	1		P	CCT	0.47657	0.368893	0.899302	0.979063	0.921236	0.568295	0.662014	0.998006	1
P	CCA	0.0149551	0.852443	0.78664	0.918245	0.0727817	0.801595	0.304088	0.284148	0.221336	0.313061		P	CCA	0.189432	0.0129611	0.921236	0.995015	0.942173	0.967099	1	1	0.423729	0.114656		P	CCA	0.294118	0.857428	0	0	0.00498504	0.190429	0.998006	1	0.90329	0.744766		P	CCA	0.0747757	0.637089	0.303091	0.711864	0.572283	0.455633	0.854437	0.79661	1
P	CCG	0.848455	1	0.998006	0.71984	0.180459	0.152542	0.722832	0.206381	0.872383	0.716849		P	CCG	0.519442	0.992024	0.936191	0.991027	0.901296	0.995015	1	0.984048	0.79661	0.978066		P	CCG	0.186441	0.60319	0	0.889332	0.77667	1	0.998006	1	1	0.535394		P	CCG	0.0518445	0.991027	1	0.999003	0.998006	1	0.992024	0.986042	1
L	CTC	0.848455	0.999003	0.548355	0.546361	0.498504	0.778664	0.922233	0.701894	0.891326	0.914257		L	CTC	0.992024	0.996012	0.536391	0.211366	0.42672	0.937188	0.78664	0.676969	0.657029	0.908275		L	CTC	0.587238	0.979063	0.961117	0.757727	0.473579	0.959123	0.164506	0.206381	0.902293	0.997009		L	CTC	0.690927	0.733799	0.927218	0.671984	0.21336	0.493519	0.0767697	0.190429	0.0907278
L	CTT	0.0548355	0.390828	0.672981	0.894317	0.597208	0.784646	0.568295	0.916251	0.872383	0.955135		L	CTT	0.8335	0.825523	0.378863	0.357926	0.484546	0.904287	0.964108	0.395813	0.794616	0.500499		L	CTT	0.617149	0.769691	0.452642	0.85344	0.274177	0.82652	0.95015	0.0418744	0.718843	0.987039		L	CTT	0.217348	0.459621	0.353938	0.875374	0.0757727	0.91326	0.354935	0.182453	0.88335
L	CTA	0.693918	0.925224	0.792622	0.525424	0.697906	0.429711	0.688933	0.0787637	0.299103	0.743769		L	CTA	0.378863	0.652044	0.184447	0.706879	0.0358923	0.448654	0.334995	0.159521	0.358923	0.785643		L	CTA	0.886341	0.397807	0.939182	0.700897	0.257228	0.859422	0.381854	0.857428	0.338983	0.241276		L	CTA	0.984048	0.234297	0.00897308	0.941176	1	0.984048	0.999003	1	1
L	CTG	0.653041	0.0588235	0.68993	0.217348	0.0348953	0.254237	0.542373	0.120638	0.531406	0.962114		L	CTG	0.830508	0.293121	0.445663	0.611167	0.684945	0.18345	0.82652	0.508475	0.861416	0.792622		L	CTG	0.21336	0.316052	0.0378863	0.570289	0.247258	0.237288	0.497507	0.0149551	0.495513	0.994018		L	CTG	0.0837488	0.680957	0.764706	0.602193	0.894317	0.326022	0.272183	0.494516	0.0967099
H	CAC	0.348953	0.487537	0.821535	0.172483	0.965105	0.984048	0.924227	0.941176	0.384845	0.158524		H	CAC	0.153539	0.388833	0.0109671	0.512463	0.201396	0.739781	0.169492	0.854437	0.997009	0.571286		H	CAC	0	0.0937188	0.288136	0.0667996	0.131605	0.889332	0.589232	0.520439	0.483549	0.939182		H	CAC	0.00498504	0.190429	0.985045	0.412762	0.0787637	0.00199402	0.285145	0.160518	0.410768
H	CAT	0.248255	0.180459	0.918245	0.28016	0.989033	0.39681	0.99003	1	0.987039	0.42672		H	CAT	0.164506	0.159521	0.0338983	0.357926	0.51346	0.236291	0.387836	0.551346	0.880359	0.237288		H	CAT	0.12662	0.0109671	0.0588235	0.250249	0.60319	0.651047	0.532403	0.319043	0.139581	0.74676		H	CAT	0.432702	0.0289133	0.0358923	0.142572	0.104686	0.489531	0.159521	0.0807577	0.224327
Q	CAA	0.0957129	0.246261	0.0199402	0.772682	0.148554	0.584247	0.9332	0.326022	0.444666	0.998006		Q	CAA	0.143569	0.395813	0.0827517	0.144566	0.00797607	0.600199	0.127617	0.0977069	0.0428714	0.874377		Q	CAA	0.0269192	0.0109671	0.101695	0.0129611	0.465603	0.733799	0.610169	0.733799	0.271186	0.0229312		Q	CAA	0.346959	0.163509	0.220339	0.0139581	0.0418744	0.189432	0.110668	0.491525	0.221336
Q	CAG	0.718843	0	0.0348953	0.000997009	0.20339	0.386839	0.0847458	0.257228	0.00199402	0.643071		Q	CAG	0.479561	0.733799	0.285145	0.882353	0.984048	0.880359	0.210369	0.00199402	0.152542	0.350947		Q	CAG	0.538385	0.0478564	0.408774	0.530409	0.727817	0.258225	0.228315	0.79661	0.122632	0.565304		Q	CAG	0.00697906	0.590229	0.94317	0.908275	0.767697	0.312064	0.427717	0.346959	0.0687936
R	CGC	0.631107	1	1	0.773679	0.999003	0.961117	0.844467	0.939182	1	0.198405		R	CGC	0	0.643071	0.380857	0.722832	0.0358923	0.0827517	0.0877368	0.798604	1	1		R	CGC	0.00299103	0.452642	0.962114	0.167498	0.251246	0.20339	0.716849	0.321037	0.567298	0.708873		R	CGC	0.140578	0.411765	0.00199402	0.946162	0.321037	0.877368	0.862413	0.0119641	0.0358923
R	CGT	0.819541	0.869392	0.982054	0.592223	1	0.805583	0.415753	0.875374	0.861416	0.895314		R	CGT	0	0.00997009	0.225324	0.96012	0.765703	0.0817547	0.449651	0.00299103	1	0.991027		R	CGT	0.0119641	0.0667996	0.0289133	0.0588235	0.0358923	0.0159521	0.817547	0.0717846	0.0498504	0.49651		R	CGT	0.0897308	0.9332	0.102692	0.335992	0.218345	0.235294	0.160518	0.154536	0.219342
R	CGA	0.409771	0.724826	0.9332	0.642074	0.975075	0.595214	0.704885	0.229312	0.721834	0		R	CGA	0.00598205	0.75673	0.437687	0.485543	0.962114	0.602193	0.124626	0.775673	0.844467	0.662014		R	CGA	0.244267	0.00398804	0.382851	0.984048	0.615155	0.98006	1	0.792622	0.982054	1		R	CGA	0.281157	0.00299103	0	0.450648	0.000997009	0.000997009	0.894317	0.480558	0.930209
R	CGG	0.391825	0.969093	0.464606	0.00697906	0.803589	0.989033	0.688933	0.655035	0.147557	0.791625		R	CGG	0.0109671	0.43669	0.133599	0.421735	0.0677966	0	0.0448654	0.0199402	0.968096	0.176471		R	CGG	0.282154	0.433699	0.874377	0.952144	0.530409	0.00299103	0.0348953	0.00398804	0.440678	0.205384		R	CGG	0.398804	0.43669	0.00697906	0.987039	0.939182	0.942173	0.99003	0.0428714	0.384845
S	TCC	1	1	0.911266	0.0398804	0.341974	0.723829	0.828514	0.981057	0.178465	0.558325		S	TCC	0.916251	0.765703	0.993021	0.86341	0.712861	0.836491	0.958126	0.992024	0.931206	0.711864		S	TCC	0.762712	0.999003	0.965105	0.996012	0.885344	0.345962	0.382851	0.912263	0.815553	0.956132		S	TCC	0.996012	0.918245	0.898305	0.951147	0.998006	0.900299	0.215354	0.258225	0.0209372
S	TCT	0.963111	0.911266	0.601196	0.0109671	0.265204	0.4666	0.0149551	0.927218	0.637089	0.482552		S	TCT	0.932203	0.383848	0.846461	0.24327	0.2333	0.615155	0.0987039	0.335992	0.158524	0.702891		S	TCT	0	0.953141	0.0568295	0.261216	0.792622	0.632104	0.812562	0.316052	0.81655	0.706879		S	TCT	0.934197	0.677966	0.876371	0.888335	0.382851	0.195414	0.0109671	0.160518	0.228315
S	TCA	0.27318	0.532403	0.0398804	0.482552	0.758724	0.196411	0.142572	0.251246	0.288136	0.142572		S	TCA	0.607178	0	0.175474	0.545364	0.250249	0.231306	0.835494	0.514457	0.247258	0.865404		S	TCA	0.13659	0.641077	0.134596	0.500499	0.475573	0.287139	0.331007	0.800598	0.485543	0.764706		S	TCA	0.318046	0.750748	0.502493	0.195414	0.649053	0.101695	0.535394	0.706879	0.469591
S	TCG	0.373878	0.529412	0.285145	0.564307	0.920239	0.0608175	0.647059	0.498504	0.323031	0.81655		S	TCG	0.99003	0.850449	0.994018	0.47657	0.73679	0.412762	0.409771	0.751745	0.0787637	0.852443		S	TCG	0.998006	0.186441	0.967099	0.95015	0.346959	0.307079	0.0608175	0.479561	0.24327	0.647059		S	TCG	0.199402	0.138584	0.297109	0.742772	0.912263	0.867398	0.860419	0.899302	0.467597
F	TTC	0	0.777667	0.0867398	0.899302	0.182453	0.221336	0.807577	0.811565	0.423729	0.403789		F	TTC	1	0.840479	0.811565	0.653041	0.565304	0.592223	0.450648	0.246261	0.162512	0.269192		F	TTC	0.897308	0.115653	0.365902	0.134596	0.25324	0.0269192	0.268195	0.216351	0.967099	0.382851		F	TTC	0.916251	0.545364	0.987039	0.566301	0.188435	0.690927	0.00199402	0.132602	0.0588235
F	TTT	0	0.0558325	0.298106	0.552343	0.184447	0.622134	0.514457	0.337986	0.0289133	0.823529		F	TTT	0	0.467597	0.216351	0.0877368	0.0149551	0.163509	0.147557	0.433699	0.00697906	0.0757727		F	TTT	0	0.27318	0.328016	0.0757727	0.158524	0.0578265	0.346959	0.299103	0.966102	0.60319		F	TTT	0	0.200399	0.817547	0.0797607	0.0957129	0.170489	0.697906	0.0329013	0.502493
L	TTA	0	0.154536	0.323031	0.0398804	0.609172	0.134596	0.296112	0.592223	0.232303	0.928215		L	TTA	0	0.267198	0.580259	0.269192	0.0319043	0.278166	0.90329	0.582253	0.835494	0.307079		L	TTA	0.228315	0.0139581	0.0857428	0.0568295	0.000997009	0	0.659023	0.855434	0.0129611	0.517448		L	TTA	0.289133	0.0508475	0.962114	0.962114	0.999003	0.14656	0.227318	0.733799	0.744766
L	TTG	0	0.311067	0.0877368	0.184447	0.356929	0.309073	0.123629	0.555334	0.621137	0.279163		L	TTG	0	0.114656	0.204387	0.939182	0.255234	0.184447	0.463609	0.296112	0.0658026	0.224327		L	TTG	0.995015	0.230309	0.118644	0.00697906	0.103689	0.0109671	0.145563	0.276171	0.0179462	0.153539		L	TTG	0.968096	0.338983	0.974078	0.696909	0.332004	0.514457	0.663011	0.19342	0.508475
Y	TAC	0.170489	0	0.117647	0.0338983	0.163509	0.267198	0.427717	0.133599	0.531406	0.0847458		Y	TAC	0.336989	0.26321	0.0319043	0.293121	0.398804	0.434696	0.571286	0.317049	0.208375	0.985045		Y	TAC	0.133599	0.269192	0.00299103	0.0109671	0.0518445	0.698903	0.0618146	0.978066	0.00997009	0.750748		Y	TAC	0.684945	0.0867398	0.541376	0.498504	0.112662	0.176471	0.515454	0.908275	0.109671
Y	TAT	0.0867398	0	0.0309073	0.245264	0.323031	0.128614	0.143569	0.457627	0.36989	0.711864		Y	TAT	0.225324	0	0.394816	0.19342	0.800598	0.149551	0.405783	0.344965	0.848455	0.692921		Y	TAT	0.579262	0.127617	0.427717	0.43669	0.178465	0.87338	0.789631	0.471585	0.230309	0.997009		Y	TAT	0.10668	0.142572	0.118644	0.00797607	0.804586	0.00498504	0.554337	0.910269	0.200399
*	TAA	0.981057	0.998006	0.96012	1	0.342971	0.0837488	0.0977069	0.0338983	0.410768	0.170489		*	TAA	0.914257	0.993021	0.952144	0.99003	1	0.335992	0.103689	0.111665	0.0528415	0.394816		*	TAA	0.680957	0.9332	0.95015	0.978066	0.971087	1	0.346959	0.131605	0.119641	0.0408774		*	TAA	1	1	0.94317	0	0.00797607	0.0807577	0.00398804	0.0578265	0.973081
*	TAG	0.977069	0.998006	0.998006	1	0.297109	0.0418744	0.0538385	0.00797607	0.363908	0.0757727		*	TAG	0.881356	0.993021	0.994018	0.994018	1	0.319043	0.0538385	0.0388833	0.00398804	0.326022		*	TAG	0.670987	0.930209	0.987039	0.991027	0.993021	1	0.303091	0.0428714	0.0498504	0.00697906		*	TAG	1	0.965105	0.97009	0	0	0.108674	0.414756	0.192423	0.97009
C	TGC	0.836491	0.966102	0.0229312	0.538385	0.314058	0.352941	0.283151	0.789631	0.764706	0.0448654		C	TGC	0.857428	0.370887	0.914257	0.149551	0.185444	0.125623	0.147557	0.665005	0.119641	0.518445		C	TGC	0.661017	0.820538	0.0558325	0.259222	0.0358923	0.240279	0.502493	0.0867398	0.138584	0.684945		C	TGC	0.17348	0.683948	0.947159	0.805583	0.998006	0.622134	0.180459	0.420738	0.972084
C	TGT	0	0.252243	0.212363	0.312064	0.803589	0.305085	0.145563	0.138584	0.105683	0.73679		C	TGT	0.87338	0.459621	0.554337	0.506481	0.407777	0.186441	0.66999	0.225324	0.00997009	0.333001		C	TGT	0.757727	0.394816	0.0897308	0.879362	0.0697906	0.00897308	0.932203	0.0408774	0.872383	0.134596		C	TGT	0.668993	0.561316	0.654038	0.902293	0.939182	0.889332	0.897308	0.889332	0.884347
*	TGA	0.995015	0.991027	0.974078	1	0.3001	0.0309073	0.0508475	0.0129611	0.342971	0.11665		*	TGA	0.959123	0.986042	0.968096	0.998006	1	0.31007	0.0398804	0.0438684	0.00398804	0.382851		*	TGA	0.706879	0.906281	0.972084	0.993021	0.994018	1	0.302094	0.0388833	0.0468594	0.00897308		*	TGA	1	1	0.0987039	0.705882	0.680957	0.999003	0.991027	1	1
W	TGG	0.0438684	0.0169492	0.207378	0.424726	0.0249252	0.0458624	0.274177	0.315055	0.0887338	0.691924		W	TGG	0.961117	1	0.884347	0.234297	0.0927218	0.00897308	0.238285	0.000997009	0.198405	0.0418744		W	TGG	0.992024	0.739781	0.3001	0.764706	0.241276	0.131605	0.382851	0.0169492	0.141575	0.321037		W	TGG	0.316052	0.0757727	0.00897308	0	0.838485	0.155533	0.0438684	0.127617	0.000997009
T	ACC	0.546361	0.909272	0.172483	0.558325	0.899302	0.103689	0.981057	0.844467	0.222333	0.665005		T	ACC	0.119641	0.891326	0.000997009	0.0338983	0.541376	0.00598205	0.107677	0.59322	0.785643	0.479561		T	ACC	0.64008	0.0458624	0.269192	0.547358	0.344965	0.581256	0.891326	0.0408774	0.75673	0.682951		T	ACC	0.142572	0.200399	0.808574	0.376869	0.530409	0.869392	0.0109671	0.645065	0.128614
T	ACT	0.805583	0.00199402	0.0458624	0.368893	0.0897308	0.514457	0.870389	0.572283	0.946162	0.302094		T	ACT	0.215354	0.141575	0.00299103	0.182453	0.898305	0.797607	0.282154	0.0289133	0.104686	0.283151		T	ACT	0.793619	0.514457	0.239282	0.855434	0.850449	0.361914	0.773679	0.00398804	0.12662	0.675972		T	ACT	0.182453	0.326022	0.425723	0.333001	0.622134	0.878365	0.239282	0.225324	0.59322
T	ACA	0.152542	0.000997009	0.0348953	0.661017	0.592223	0.856431	0.457627	0.812562	0.0109671	0.865404		T	ACA	0.0129611	0.0348953	0.219342	0.18345	0.1665	0.846461	0.196411	0.0498504	0.0598205	0.745763		T	ACA	0.427717	0.00299103	0.0927218	0.110668	0.657029	0.548355	0.235294	0.207378	0.220339	0.149551		T	ACA	0.368893	0.000997009	0.363908	0.204387	0.224327	0.292124	0.998006	0.986042	0.966102
T	ACG	0.0139581	0.108674	0.00299103	0.286142	0.302094	0.122632	0.694915	0.163509	0.271186	0.158524		T	ACG	0.534397	0.0867398	0.0209372	0.161515	0.506481	0.0448654	0.190429	0.0658026	0.574277	0.749751		T	ACG	0.00697906	0.51346	0.288136	0.837488	0.879362	0.382851	0.293121	0.6999	0.70987	0.0149551		T	ACG	0.497507	0.258225	0.323031	0.621137	0.545364	0.447657	0.558325	0.96012	0.984048
I	ATC	0.154536	0.0109671	0	0.0338983	0.937188	0.639083	0.0209372	0.995015	0.774676	0.868395		I	ATC	0.282154	0.00997009	0.00299103	0.00498504	0.00498504	0.484546	0.0119641	0.422732	0.181456	0.309073		I	ATC	0.268195	0.188435	0.0149551	0.00299103	0.107677	0.0398804	0.517448	0.0249252	0.0907278	0.00398804		I	ATC	0.478564	0.250249	0.341974	0.763709	0.301097	0.238285	0.208375	0.0169492	0.000997009
I	ATT	0.00398804	0.00299103	0.0249252	0.00299103	0.0458624	0.430708	0.0817547	0.551346	0.897308	0.635095		I	ATT	0.716849	0.161515	0.31007	0.000997009	0.0837488	0.132602	0.615155	0.129611	0.951147	0.348953		I	ATT	0.804586	0.332004	0.329013	0.0638086	0.190429	0.185444	0.0199402	0.0139581	0.562313	0.0877368		I	ATT	0.624128	0.00299103	0.419741	0.00997009	0.00498504	0.0448654	0.109671	0.398804	0.0867398
I	ATA	0	0.0588235	0.147557	0.778664	0.423729	0.118644	0.265204	0.884347	0.244267	0.551346		I	ATA	0.13659	0.0478564	0.929212	0.0338983	0.0239282	0.130608	0.487537	0.19342	0.0807577	0.782652		I	ATA	0.778664	0.314058	0.0817547	0.284148	0.0229312	0.334995	0.0478564	0.217348	0.0747757	0.295115		I	ATA	0.0398804	0	0.00598205	0.0289133	0.332004	0.713858	0.225324	0.927218	0.901296
M	ATG	0.0129611	0.00697906	0.00398804	0.304088	0.29013	0.000997009	0.674975	0.00199402	0.0129611	0.948156		M	ATG	0.735793	0.454636	0.00199402	0.114656	0.693918	0.459621	0.124626	0.373878	0.0618146	0.442672		M	ATG	0.0189432	0.771685	0.0717846	0.00299103	0.0119641	0.0777667	0	0.0438684	0.0927218	0.33998		M	ATG	0.469591	0.787637	0.742772	0.196411	0.386839	0.161515	0.268195	0.208375	0.0707876
N	AAC	0.0538385	0	0.115653	0.686939	0.975075	0.678963	0.0209372	0.977069	0.607178	0.504487		N	AAC	0.182453	0.118644	0.00997009	0.0358923	0.721834	0.162512	0.147557	0.547358	0.245264	0.564307		N	AAC	0.947159	0.261216	0.118644	0.0348953	0.205384	0.0249252	0.0667996	0.0807577	0.729811	0.232303		N	AAC	0.219342	0.289133	0.0598205	0.0169492	0	0.247258	0.0887338	0.222333	0.0229312
N	AAT	0.110668	0.0418744	0.242273	0.311067	0.403789	0.659023	0.241276	0.125623	0.87338	0.927218		N	AAT	0.457627	0.00897308	0.14656	0.622134	0.441675	0.488534	0.272183	0.0508475	0.144566	0.196411		N	AAT	0.382851	0.598205	0.0977069	0.54337	0.633101	0.464606	0.147557	0.0727817	0.227318	0.327019		N	AAT	0.0717846	0.0398804	0	0	0.358923	0.0478564	0.68993	0.912263	0.958126
K	AAA	0.000997009	0.0757727	0.0977069	0.48654	0.176471	0.959123	0.92323	0.720837	0.101695	0.865404		K	AAA	0	0	0.00299103	0.0408774	0.409771	0.459621	0.00398804	0.186441	0.597208	0.485543		K	AAA	0.419741	0	0.283151	0.0159521	0.00598205	0.32004	0.0289133	0.724826	0.427717	0.189432		K	AAA	0.0249252	0	0	0	0	0.0109671	0.190429	0.0119641	0.749751
K	AAG	0.0219342	0.0727817	0.773679	0.760718	0.334995	0.35992	0.530409	0.478564	0.266201	0.777667		K	AAG	0.000997009	0	0.0149551	0.485543	0.713858	0.703888	0.0847458	0.179462	0.402792	0.325025		K	AAG	0.859422	0.700897	0.546361	0.80658	0.897308	0.473579	0.639083	0.162512	0.343968	0.595214		K	AAG	0.227318	0.0338983	0	0.0478564	0.00498504	0.0628116	0.546361	0.0518445	0.123629
S	AGC	0.365902	0.880359	0.659023	0.432702	0.15653	0.785643	0.592223	0.605184	0.655035	0.623131		S	AGC	0.642074	0.323031	0.33998	0.635095	0.659023	0.859422	0.370887	0.0628116	0.0408774	0.224327		S	AGC	0.0149551	0.392822	0.437687	0.952144	0.66999	0.706879	0.355932	0.618146	0.695912	0.928215		S	AGC	0.839482	0.951147	0.596211	0.361914	0.157527	0.506481	0.512463	0.0159521	0.0917248
S	AGT	0.528415	0.381854	0.931206	0.0827517	0.172483	0.325025	0.107677	0.0877368	0.525424	0.313061		S	AGT	0.77667	0.890329	0.409771	0.301097	0.724826	0.765703	0.294118	0.59322	0.0329013	0.160518		S	AGT	0.581256	0.128614	0.754736	0.991027	0.552343	0.852443	0.175474	0.847458	0.111665	0.315055		S	AGT	0.4666	0.0598205	0.0638086	0.133599	0.40678	0.97009	0.987039	0.987039	0.996012
R	AGA	0.112662	0.390828	0.965105	0.896311	0.740778	0.981057	0.0658026	0.123629	0.574277	0.839482		R	AGA	0	0.125623	0.42672	0.0149551	0.381854	0.231306	0.0787637	0.261216	0.364905	0.0618146		R	AGA	0.674975	0.218345	0.775673	0.258225	0.724826	0.713858	0.492522	0.138584	0.693918	0.544367		R	AGA	0.112662	0	0	0.0129611	0.0458624	0.135593	0.915254	1	0.998006
R	AGG	0.237288	0.697906	0.926221	0.948156	0.998006	0.849452	0.782652	0.44666	0.306082	0.0917248		R	AGG	0	0.217348	0.51346	0.488534	0.281157	0.524427	0	0.345962	0.117647	0.312064		R	AGG	0.676969	0.810568	0.22333	0.50349	0.399801	0.0937188	0.275174	0.0917248	0.347956	0.548355		R	AGG	0.945165	0	0	0.00897308	0.111665	0.882353	0.248255	0.995015	0.898305
A	GCC	0.999003	0.99003	0.991027	0.336989	0.811565	0.944167	0.925224	0.52343	0.370887	0.954138		A	GCC	0.995015	0.928215	0.954138	0.712861	0.704885	0.703888	0.877368	1	0.882353	0.314058		A	GCC	0.733799	0.917248	0.945165	0.98006	0.997009	0.778664	0.147557	0.0967099	0.141575	0		A	GCC	0.428714	0.564307	0.998006	0.961117	0.80658	0.582253	0.952144	0.0438684	0.186441
A	GCT	0.908275	0.0309073	0.804586	0.138584	0.638086	0.959123	0.777667	0.749751	0.698903	0.352941		A	GCT	0.0917248	0.848455	0.996012	0.355932	0.0129611	0.755733	0.474576	0.886341	0.807577	0.625125		A	GCT	0.847458	0.520439	0.568295	0.704885	1	0.331007	0.177468	0.0468594	0.345962	0.572283		A	GCT	0.765703	0.825523	0.861416	0.940179	0.394816	0.260219	0	0.120638	0.0428714
A	GCA	0.284148	0.0528415	0.568295	0.658026	0.0219342	0.0159521	0.0608175	0.378863	0.188435	0.743769		A	GCA	0.777667	0.0857428	0.982054	0.186441	0.113659	0.730808	0.639083	0.0997009	0.113659	0.118644		A	GCA	0.109671	0.0628116	0.532403	0.0558325	0.400798	0.807577	0.0299103	0.285145	0.0418744	0.224327		A	GCA	0.0309073	0.659023	0.279163	0.245264	0.802592	0.19342	0.259222	0.600199	0.348953
A	GCG	0.949153	0.91326	0.121635	0.524427	0.0578265	0.0239282	0.0458624	0.265204	0.4666	0.0887338		A	GCG	0.997009	0.981057	0.829511	0.59322	0.142572	0.935194	0.497507	0.170489	0.927218	0.371884		A	GCG	0.852443	0.979063	0.902293	0.276171	0.836491	0.587238	0.710867	0.187438	0.335992	0.0608175		A	GCG	0.460618	0.39681	0.982054	0.517448	0.850449	0.993021	0.362911	0.301097	0.524427
V	GTC	0.764706	0.123629	0.460618	0.393819	0.0857428	0.352941	0.803589	0.0398804	0.999003	0.604187		V	GTC	0.991027	0.444666	0.0877368	0.0119641	0.231306	0.132602	0.00797607	0.0368893	0.0159521	0.632104		V	GTC	0.10668	0.443669	0.731805	0.0408774	0.535394	0.57328	0.580259	0.0199402	0.657029	0.0279163		V	GTC	0.315055	0.784646	0.971087	0.755733	0.949153	0.617149	0.00299103	0.0638086	0
V	GTT	0.261216	0.0368893	0.785643	0.0129611	0.95015	0.515454	0.341974	0.922233	0.848455	0.411765		V	GTT	0.937188	0.169492	0.510469	0.0239282	0.0498504	0.306082	0.0169492	0.159521	0.750748	0.90329		V	GTT	0.661017	0.90329	0.618146	0.125623	0.185444	0.164506	0.0129611	0.0418744	0.191426	0.780658		V	GTT	0.460618	0.605184	0.607178	0.52343	0.0817547	0.467597	0.115653	0.0219342	0.0588235
V	GTA	0.189432	0.0398804	0.000997009	0.0468594	0.0568295	0.622134	0.00498504	0.621137	0.25324	0.433699		V	GTA	0.930209	0.0229312	0.292124	0.0149551	0.103689	0.0249252	0.0129611	0.0129611	0.0677966	0.437687		V	GTA	0.207378	0.0189432	0.231306	0	0.0658026	0.306082	0.00498504	0.0468594	0.140578	0.0578265		V	GTA	0.0458624	0.0558325	0.978066	0.821535	0.224327	0.765703	0.207378	0.0189432	0.0478564
V	GTG	0.305085	0.00498504	0.0129611	0.104686	0.530409	0.302094	0.89332	0.14656	0.819541	0.0997009		V	GTG	0.965105	0.342971	0.0159521	0.246261	0.0159521	0	0.00199402	0.00299103	0.337986	0.539382		V	GTG	0.947159	0.342971	0.846461	0.487537	0.105683	0.138584	0.00797607	0.0388833	0.0558325	0		V	GTG	0.615155	0.897308	0.581256	0.606181	0.646062	0.00199402	0.400798	0.0588235	0
D	GAC	0.601196	0.121635	0.00299103	0.993021	0.529412	0.575274	0.0747757	0.0388833	0.171486	0.0757727		D	GAC	0.985045	0.713858	0.0598205	0.0498504	0.951147	0.0907278	0.10668	0.886341	0.122632	0.619143		D	GAC	0.633101	0.32004	0.530409	0.301097	0.0358923	0.15653	0.00498504	0.479561	0.24327	0.00498504		D	GAC	0.963111	0.797607	0.892323	0.277168	0.765703	0.358923	0.409771	0.39681	0.28016
D	GAT	0.534397	0.0378863	0.764706	0.781655	0.0458624	0.925224	0.465603	0.0667996	0.120638	0.127617		D	GAT	0.751745	0.260219	0.107677	0.744766	0.402792	0.1665	0.514457	0.115653	0.139581	0.154536		D	GAT	0.102692	0.701894	0.0518445	0.723829	0.482552	0.661017	0.740778	0.0199402	0.0757727	0.0747757		D	GAT	0.859422	0.866401	0.983051	0.182453	0.152542	0.158524	0.87338	0.814556	0.117647
E	GAA	0.229312	0.00398804	0.41675	0.608175	0.0697906	0.324028	0.421735	0.374875	0.245264	0.982054		E	GAA	0.754736	0	0.0767697	0.0109671	0.912263	0.813559	0.434696	0.108674	0.163509	0.477567		E	GAA	0.918245	0.568295	0.559322	0.00598205	0.972084	0.251246	0.518445	0.112662	0.425723	0.0478564		E	GAA	0.400798	0.953141	0.279163	0.0398804	0.0309073	0.00897308	0.113659	0.94317	0.150548
E	GAG	0.818544	0.743769	0.717846	0.304088	0.858425	0.938185	0.535394	0.711864	0.184447	0.890329		E	GAG	0.267198	0.355932	0.142572	0.112662	0.885344	0.556331	0.238285	0.412762	0.822532	0.134596		E	GAG	0.973081	0.884347	0.993021	0.966102	0.964108	0.0877368	0.534397	0.750748	0.0159521	0.0458624		E	GAG	0.983051	0.855434	0.947159	0.114656	0.104686	0.0558325	0.345962	0.246261	0.779661
G	GGC	0.545364	0.912263	0.0638086	0.423729	0.278166	0.296112	0.690927	0.313061	0.10668	0.0787637		G	GGC	0.782652	0.37986	0.975075	0.998006	0.152542	0.949153	0.922233	0.771685	0.00797607	0.141575		G	GGC	0.946162	0.772682	0.981057	0.000997009	0.0259222	0.00398804	0.0717846	0	0.00299103	0.000997009		G	GGC	0.994018	0.976072	0.996012	0.351944	0.585244	0.727817	0.215354	0.00897308	0.00498504
G	GGT	0.989033	0.0658026	0.733799	0.77667	0.152542	0.0329013	0.0977069	0.473579	0.417747	0.0957129		G	GGT	0.965105	0.997009	0.904287	0.994018	0.327019	0.641077	0.979063	0.616152	0.32004	0.0199402		G	GGT	0.744766	0.922233	0.973081	0.577268	0.158524	0.0658026	0.000997009	0.48654	0.15653	0.162512		G	GGT	0.981057	0.972084	1	0.262213	0.941176	0.985045	0.0229312	0.0997009	0.411765
G	GGA	0.358923	0.121635	0.238285	0.623131	0.767697	0.154536	0.0977069	0.190429	0.838485	0.295115		G	GGA	0.966102	0.739781	0.812562	0.114656	0.698903	0.907278	0.81655	0.00598205	0.0588235	0.0967099		G	GGA	0.663011	0.624128	0.904287	0.4666	0.0189432	0.613161	0.440678	0.508475	0.0747757	0.00997009		G	GGA	0.809571	0.926221	0.983051	0.591226	0	0.158524	0.269192	0.165503	0.48654
G	GGG	0.987039	0.549352	0.595214	0.00598205	0.0667996	0.433699	0.261216	0.124626	0	0.0229312		G	GGG	0.962114	1	0.871386	0.467597	0.196411	0.0897308	0.409771	0.735793	0.0239282	0		G	GGG	0.978066	0.842473	0.904287	0.626122	0.879362	0.0129611	0.0857428	0.566301	0.0229312	0.00299103		G	GGG	1	0.995015	0.999003	0.995015	0.89332	0.63011	0.986042	0.00897308	0.0578265
[truncated: 12 more columns]

## Sheet: Heatmap for codons in sites
Stop efficiency at the corresponging triplet while located in the ribosome sites								P-values for shuffled datasets exceeding experimental data of stop efficiency at the corresponging triplet while located in the ribosome sites
		Ribosome sites								Ribosome sites
		-2	E	P	A	2				-2	E	P	A	2
P	CCC	-0.000636504	-0.00238555	-0.00748545	0.00464768	0.00743035		P	CCC	1	1	1	1	1
P	CCT	0.00189078	0.00186648	0.000846491	0.00686964	0.0148038		P	CCT	1	1	1	1	0.716849
P	CCA	0.00635423	0.00366175	0.0122548	0.0115652	0.0143866		P	CCA	0.40678	1	0.105683	0.891326	0.898305
P	CCG	0.00310365	0.00242103	0.00490631	0.00344437	0.0127699		P	CCG	0.997009	1	1	1	0.995015
L	CTC	0.00231664	0.00458052	0.00438803	0.0128796	0.0146901		L	CTC	1	0.993021	0.999003	0.25324	0.428714
L	CTT	0.00314443	0.00467158	0.00386312	0.00945658	0.0195091		L	CTT	0.920239	0.889332	0.963111	0.634098	0.00797607
L	CTA	0.00387375	0.0107797	0.00682269	-0.00388519	0.0172721		L	CTA	0.828514	0.144566	0.867398	1	0.220339
L	CTG	0.00806642	0.00664967	0.0102296	0.0116671	0.0204745		L	CTG	0.12662	0.794616	0.0827517	0.336989	0.00498504
H	CAC	0.00478219	0.00852606	0.0116085	0.0165367	0.0198087		H	CAC	0.904287	0.241276	0.0259222	0.00498504	0.00199402
H	CAT	0.00273385	0.0113663	0.0130477	0.0188283	0.0229868		H	CAT	0.986042	0.0488534	0.0279163	0	0.00199402
Q	CAA	0.00944776	0.0163117	0.0181304	0.0207075	0.0243039		Q	CAA	0.256231	0.00199402	0.000997009	0.00498504	0
Q	CAG	0.0136442	0.00748311	0.0112373	0.0121866	0.0207058		Q	CAG	0	0.666002	0.217348	0.401795	0.00398804
R	CGC	0.000524157	0.00746651	0.00996242	0.0133317	0.0138533		R	CGC	1	0.577268	0.124626	0.0727817	0.733799
R	CGT	0.00111309	0.00901706	0.0153019	0.0149086	0.0177804		R	CGT	1	0.187438	0	0.0448654	0.0648056
R	CGA	0.00535423	0.00768595	0.00357385	0.0209682	0.0217144		R	CGA	0.797607	0.684945	1	0	0.00299103
R	CGG	0.00637921	0.0122541	0.0108956	0.0100196	0.0167827		R	CGG	0.64008	0	0.0648056	0.911266	0.159521
S	TCC	0.00196933	0.00226474	0.00262763	0.00770073	0.0125605		S	TCC	1	1	1	0.99003	0.888335
S	TCT	0.00565127	0.00798368	0.00854442	0.0134304	0.021428		S	TCT	0.595214	0.40678	0.282154	0.37986	0
S	TCA	0.0101978	0.0117696	0.0116452	0.0150568	0.0164884		S	TCA	0.0658026	0.0628116	0.217348	0.260219	0.4666
S	TCG	0.00668785	0.00547847	0.00711232	0.0100004	0.013706		S	TCG	0.485543	0.982054	0.881356	0.890329	0.778664
F	TTC	0.00567394	0.00686731	0.010993	0.0125355	0.0160261		F	TTC	0.512463	0.683948	0.0817547	0.159521	0.0877368
F	TTT	0.0125183	0.0161386	0.0126194	0.0206539	0.0208431		F	TTT	0.000997009	0	0.00498504	0.000997009	0.0139581
L	TTA	0.0154458	0.0122597	0.0226912	0.0112687	0.0209564		L	TTA	0	0.0229312	0	0.745763	0.0289133
L	TTG	0.0122041	0.0124044	0.0181332	0.00938702	0.0224134		L	TTG	0	0.0179462	0	0.822532	0
Y	TAC	0.0155005	0.0108806	0.0150912	0.0160633	0.0149891		Y	TAC	0	0.100698	0	0.0189432	0.32004
Y	TAT	0.0224039	0.0142827	0.0075657	0.0171361	0.0198354		Y	TAT	0	0.0299103	0.587238	0.0189432	0.0608175
*	TAA	0	0	0	0.00884577	-0.00201969		*	TAA	1	1	1	0.90329	1
*	TAG	0	0	0	0.0101398	-0.00311794		*	TAG	1	1	1	0.665005	1
C	TGC	0.0064806	0.00945928	0.011749	0.00860844	0.0128148		C	TGC	0.423729	0.209372	0.0229312	0.956132	0.780658
C	TGT	0.0123356	0.0089516	0.0100088	0.00708021	0.0132999		C	TGT	0	0.269192	0.119641	0.998006	0.71984
*	TGA	0	0	0	-0.00657064	9.64515e-06		*	TGA	1	1	1	1	1
W	TGG	0.0114489	0.0100797	0.00997859	0.0216179	0.0137465		W	TGG	0	0.311067	0.383848	0	0.774676
T	ACC	0.00389745	0.0109849	0.00936955	0.0170285	0.0152407		T	ACC	0.845464	0.0119641	0.394816	0.0568295	0.361914
T	ACT	0.00751607	0.0116779	0.00778418	0.0170603	0.0221833		T	ACT	0.154536	0.0119641	0.613161	0.210369	0.00398804
T	ACA	0.00974309	0.0159111	0.0160186	0.0174622	0.0201812		T	ACA	0.0319043	0.000997009	0.0129611	0.457627	0.0697906
T	ACG	0.0107883	0.0127106	0.0105951	0.0127961	0.0200198		T	ACG	0	0.00897308	0.21336	0.723829	0.0129611
I	ATC	0.01129	0.019306	0.0192322	0.0183256	0.0197302		I	ATC	0.0179462	0	0	0.0179462	0.00299103
I	ATT	0.0215908	0.0150431	0.0133366	0.0241306	0.0176894		I	ATT	0	0.00997009	0.0219342	0	0.209372
I	ATA	0.019266	0.0186412	0.0154245	0.0246934	0.0252699		I	ATA	0	0.00199402	0.0269192	0.00299103	0
M	ATG	0.0185177	0.0145125	0.0214567	0.0161737	0.0211725		M	ATG	0	0.0259222	0	0.176471	0.00697906
N	AAC	0.011378	0.0156521	0.0162042	0.0240455	0.0227375		N	AAC	0.0608175	0.00598205	0.00498504	0	0
N	AAT	0.0150145	0.0172701	0.0130393	0.0234187	0.0208692		N	AAT	0.0289133	0.00398804	0.131605	0.000997009	0.0179462
K	AAA	0.0164843	0.0328824	0.0234742	0.0355002	0.0229427		K	AAA	0.0199402	0	0	0	0.00697906
K	AAG	0.00963006	0.0201251	0.00775796	0.0292673	0.0235577		K	AAG	0.218345	0	0.890329	0	0
S	AGC	0.00464835	0.00904045	0.00823339	0.0154858	0.017169		S	AGC	0.723829	0.21336	0.720837	0.272183	0.110668
S	AGT	0.0111272	0.00849472	0.00685109	0.0114735	0.0194635		S	AGT	0.120638	0.562313	0.809571	0.929212	0.0458624
R	AGA	0.0072975	0.023557	0.0103117	0.0291916	0.0210574		R	AGA	0.754736	0	0.663011	0	0.0179462
R	AGG	0.00311845	0.0148964	0.0115348	0.0207649	0.0206153		R	AGG	0.985045	0	0.18345	0.000997009	0.00498504
A	GCC	0.00207132	0.00332162	0.00671625	0.0100412	0.0109207		A	GCC	1	0.999003	0.867398	0.946162	0.999003
A	GCT	0.00447437	0.00653991	0.00629791	0.0139433	0.0133775		A	GCT	0.714855	0.705882	0.827517	0.153539	0.850449
A	GCA	0.00947818	0.0103018	0.0140386	0.0164883	0.0135588		A	GCA	0.0109671	0.117647	0.00797607	0.0797607	0.927218
A	GCG	0.00747852	0.00512186	0.00661256	0.00996474	0.0115117		A	GCG	0.163509	0.981057	0.89332	0.936191	0.992024
V	GTC	0.00709833	0.0115879	0.0103989	0.0125844	0.0138465		V	GTC	0.389831	0.00299103	0.0558325	0.145563	0.519442
V	GTT	0.0093716	0.0105353	0.00961319	0.0148992	0.0129488		V	GTT	0.222333	0.0837488	0.143569	0.0388833	0.739781
V	GTA	0.0171428	0.0172618	0.02214	0.0181083	0.0175793		V	GTA	0	0.00199402	0	0.0398804	0.282154
V	GTG	0.0123881	0.0143477	0.0122492	0.0133699	0.0145891		V	GTG	0.00199402	0	0.0189432	0.100698	0.52343
D	GAC	0.00916592	0.00847083	0.0137207	0.011392	0.0118872		D	GAC	0.0438684	0.410768	0	0.856431	0.877368
D	GAT	0.0103066	0.0115962	0.0128889	0.00986425	0.0117445		D	GAT	0.148554	0.0997009	0.0667996	0.841476	0.884347
E	GAA	0.0132538	0.0156245	0.0124046	0.0197578	0.0229627		E	GAA	0.0458624	0.00199402	0.292124	0.0119641	0.00897308
E	GAG	0.00505389	0.0105585	0.00648409	0.0105358	0.0150118		E	GAG	0.908275	0.207378	0.985045	0.759721	0.393819
G	GGC	0.00777005	0.00586807	0.0128431	0.0109032	0.0119152		G	GGC	0.12662	0.925224	0	0.797607	0.916251
G	GGT	0.0081981	0.0042378	0.00960285	0.0077132	0.0115031		G	GGT	0.442672	0.999003	0.267198	0.998006	0.967099
G	GGA	0.0099082	0.00908208	0.0126419	0.0150513	0.0143567		G	GGA	0.11665	0.54337	0.182453	0.254237	0.651047
G	GGG	0.0103891	0.00880354	0.00963011	0.00612234	0.0108998		G	GGG	0.00897308	0.638086	0.381854	1	1

## Sheet: 2D codon heatmap
2-dimensional representation of stalling propensities with the corresponding codons located in the P- and A-sites
P\A		Codons located in the A-site
		CCC	CCT	CCA	CCG	CTC	CTT	CTA	CTG	CAC	CAT	CAA	CAG	CGC	CGT	CGA	CGG	TCC	TCT	TCA	TCG	TTC	TTT	TTA	TTG	TAC	TAT	TAA	TAG	TGC	TGT	TGA	TGG	ACC	ACT	ACA	ACG	ATC	ATT	ATA	ATG	AAC	AAT	AAA	AAG	AGC	AGT	AGA	AGG
P	CCC	-0.0381338	-0.0519554	-0.0275563	-0.0381435	0.00225861	-0.00718512	-0.0182492	0.00450008	0.00642939	-0.00238061	0.0171601	-0.00621448	0.0007861	-0.00101225	-0.00593184	-0.00283815	-0.00150556	0.00945752	0.013719	0.00904065	0.0140547	0.0286076	-0.0224358	3.91922e-05	0.0256106	0.0228848	-0.0870326	-0.0252323	-0.0104627	0.00711036	-0.0632024	0.030758	-0.00287887	-0.00682525	-0.0213345	-0.00621311	0.0164829	0.0213327	0.0305512	0.0233243	0.0230845	0.0317044	0.0158841	0.0161252	0.00626062	0.0120431	0.0187379	0.0145804
P	CCT	-0.0381803	-0.0261606	-0.036895	-0.0138566	0.0494282	-0.00286811	-0.0590254	0.0102819	0.0290909	0.0313445	0.0519223	-0.0140798	0.0234472	0.0189859	0.0101397	-0.000751787	-0.00210431	-0.00444863	0.0135558	0.00533901	0.0110362	0.0194461	0.00476503	0.0221937	-0.00768409	0.00266549	0.0215314	-0.0528995	-0.00459851	-0.0249799	-0.0156189	0.0186112	0.0103507	-0.0114558	0.00832703	0.0281072	0.0417421	0.0559078	0.0217529	0.0147549	0.0187183	0.0135535	0.0535552	0.0395755	0.0294152	0.00122841	0.0171305	-0.00744198
P	CCA	-0.0219567	-0.00149932	-0.0114669	-0.0114502	0.0350858	0.0105354	-0.0107381	0.0291592	0.0266175	0.0370289	0.0432354	0.0218421	0.00592791	0.00437158	0.0438468	0.0147061	0.0162261	0.0435928	0.0303392	0.0121206	0.026576	0.0671599	-0.00752588	0.0387949	0.0342202	0.01023	-0.0318729	0.0106618	0.00520323	0.0367931	-0.0695474	0.0727502	0.0207123	0.0481979	0.0412577	-0.00731606	0.0335621	0.00587228	0.0592011	0.0313022	0.0690656	0.00313346	0.105592	0.0331427	0.0280068	0.0156162	0.0270739	-0.00431483
P	CCG	-0.030745	0.00185295	-0.0261633	-0.0301502	0.0165102	-0.00449418	-0.00465873	0.0355826	0.0185069	0.0406264	0.0255979	-0.00191736	0.0078776	0.00695677	-0.000131901	-0.00312074	0.0162117	0.0251708	0.0218273	0.0152548	0.0269618	0.0226328	0.0346444	0.00586414	0.0141292	0.0074781	-0.0263517	-0.00418625	-1.24368e-05	0.00791784	-0.0205675	0.0285263	0.0147049	0.0170447	0.00760081	0.0140413	0.0313429	0.0409334	0.0159809	0.0398009	0.0292815	-0.0294404	0.0369105	0.0047351	0.0138243	0.000770663	0.0208269	0.000935765
L	CTC	0.00360749	0.00391887	0.0168817	0.00387382	0.0150032	0.0103504	0.00854167	0.0289745	0.0255705	0.0254323	0.0142255	0.0160432	0.00815003	0.0191471	0.00219006	0.0108767	0.00395272	0.020122	-0.0131932	-0.00242419	0.00752787	0.00327553	-0.0211245	-0.0158494	0.00323967	-0.00542676	0.0535601	0.0153381	0.000467586	-0.0233694	-0.000431056	0.0354958	0.0319462	0.0114344	0.0195132	0.00832614	0.00746917	0.0325366	0.00518625	0.000692047	-0.00860642	-0.0237302	0.0128864	0.0152235	0.00525778	-0.0354151	-0.0804404	0.0260001
L	CTT	0.00878197	0.00901273	0.00671369	0.0159675	-0.000169518	-0.0203513	-0.044478	-0.0185543	0.0299813	-0.00189289	0.0379082	-0.011248	0.00260233	0.00660122	-0.0043776	0.0230757	0.00920038	0.0290498	0.0235331	-0.0105972	0.00678157	-0.0189328	0.0233142	-0.00330057	0.0388231	0.0127486	-0.0201425	0.00230113	0.0327197	-0.00919111	0.0158337	0.00626194	0.0103865	0.00248699	0.0014447	0.0159608	0.0113823	-0.00304384	0.0554975	-0.0338024	-0.00264098	0.054581	0.0915055	0.0278062	-0.0103493	0.0385305	0.0113611	0.0227246
L	CTA	0.00113937	0.0134537	0.00425508	0.0110527	0.00221636	0.0206411	-0.0125177	0.00048603	-0.00751166	-0.00847999	0.0102852	0.0122337	-0.0133647	0.00494992	0.03142	-0.000470426	0.00594845	0.023394	-0.0143647	-0.0142132	-0.0232914	0.00220381	-0.00712822	-0.00506301	0.0191604	0.0380235	0.0524822	0.0594989	0.026142	-0.00244762	0.00271117	0.0290103	0.0531617	0.00955397	-0.0318696	0.0228925	0.0568849	0.020133	0.0174647	0.000664481	0.0108295	0.0137928	0.0453214	0.0370595	0.0218848	0.00102366	-0.0367115	0.0362838
L	CTG	0.0190613	0.0167459	0.00290751	0.0194158	0.0193378	0.023351	0.0231647	0.0311007	0.0137974	0.0319773	0.0521562	0.0339256	0.0203416	0.0128566	0.0404025	0.00527038	0.00923567	0.0363711	-0.00861301	0.0140946	0.0123996	0.0250583	-0.0318113	-0.0163749	0.0195602	0.0100626	0.0538247	0.0912093	-0.00010572	0.0114769	0.0447603	-0.00437323	0.0063223	-0.00483509	0.0531512	-0.00155996	-0.00565758	0.0271707	-0.0267858	0.00884991	0.0436809	-0.00765595	0.0373904	0.0374154	-0.000123465	-0.0164742	-0.0141304	-0.00771761
H	CAC	0.00356926	0.00590945	0.0170164	-0.00660046	0.00605892	0.00974407	-0.0164985	-0.0062159	0.00272739	0.0150973	0.0584047	0.00865613	0.015007	0.0267044	0.0200633	0.00189274	0.0189955	0.000717445	0.0215082	0.00470615	0.0389178	0.0175943	-0.00872827	-0.00207597	0.0123426	0.0116954	0.0389582	0.0189601	0.0209186	0.00888927	0.0136169	0.034534	0.00483977	0.0227792	0.042315	0.00828765	0.0296512	0.0198907	0.0647522	0.0180739	0.0300949	0.0132924	0.0410861	0.0551737	0.0132292	0.0309362	0.0646034	0.0355284
H	CAT	0.00135189	0.0379394	0.0148781	0.00672836	0.0229997	-0.00413255	-0.0172106	-0.00936711	0.0280093	0.057693	0.0156525	0.0256522	0.00700468	0.026517	0.0376857	0.021022	0.00618261	0.0124502	0.0258576	0.0177804	-0.0126398	0.013918	0.0188023	0.0172252	0.0255124	0.0455591	0.0420527	0.0375152	-0.0233182	-0.000437478	-0.00155454	0.0199733	0.0202905	0.0201279	0.0303664	0.0131714	0.00321552	0.0162711	0.0145622	0.0249602	0.0399102	0.038036	0.0241496	0.0643554	0.0422786	-0.0370745	0.014318	0.0696056
Q	CAA	0.0154934	0.0268139	0.00124656	0.0114148	0.0231154	-0.0144432	0.0198959	-0.00469658	0.0195402	0.0408303	0.00573778	0.0014202	0.0188094	0.0242314	0.0199137	0.0333201	0.0173517	0.00964741	0.0210289	0.0397952	0.0263685	0.0553443	0.0155793	-0.00460387	0.00988509	0.0532667	0.0161099	0.0681187	0.0282963	0.0367422	0.0398893	0.0147121	0.0284065	0.0123334	0.027242	0.0308497	0.0122961	0.0646698	0.0110715	0.0265332	0.0315077	0.0769869	0.0352454	0.0377451	0.0193571	-0.0105975	0.0892802	0.0693418
Q	CAG	0.00314482	-0.00811347	0.040379	0.0229958	0.0134635	0.0244925	-0.0154529	0.0213849	0.0136827	0.035327	0.0234055	-0.00456442	0.03726	0.0210661	0.0248897	0.00303741	0.00840177	0.0080427	0.03488	-0.00396407	-0.00473887	0.0160366	-0.0141102	0.0209421	0.0334632	-0.0152049	0.0549827	0.0202599	0.0178959	0.0220393	-0.0105788	0.0278943	0.0140892	0.00489597	0.0228312	0.0149514	0.0308561	0.00758356	0.0266723	0.0483796	0.00496271	0.0241453	0.0988021	0.014452	-0.0041331	0.0186743	0.0746062	0.0132169
R	CGC	0.018706	0.0122041	0.0206523	0.00426759	0.0143477	0.026229	0.00408686	0.011136	0.00674309	0.0263095	0.0195476	0.00338912	0.0203533	0.00884285	0.0184567	0.0226475	0.00515458	0.0144922	0.0021057	0.00772946	0.0312065	0.0284055	0.0294565	0.00688907	-0.00820991	-0.0204579	0.0318793	0.0414977	0.00904234	0.00644687	0.000696133	0.0270352	0.0164248	0.00950035	0.045495	0.00492002	0.00928559	-0.0132459	0.0279266	0.0251241	0.0232187	0.0342965	0.00124067	0.0502012	0.0127741	-0.0088932	0.0360016	0.0141624
R	CGT	0.0103696	0.0268089	0.0193218	0.0178481	0.0241991	0.00836324	0.0172419	0.0465332	0.0272879	0.0201541	0.0479948	0.0251209	0.0240807	0.032592	0.00837558	0.0199116	0.00626474	0.017814	0.0186934	0.0331199	0.0125529	0.0364019	0.0304515	-0.0209557	0.0364029	0.0258308	-0.0476772	0.0377541	0.0278547	0.010839	0.00157701	0.0288253	0.0158195	0.016013	0.0510595	0.0258452	0.0176478	0.0387196	0.0455963	0.00842704	0.0300113	0.0216742	0.0368844	-0.010573	0.0122343	0.0393328	0.0463972	0.0645744
R	CGA	0.00788365	0.0412765	0.0252069	0.000292297	0.0091893	0.00318355	-0.0676971	-0.00495952	0.0259498	-0.01089	0.0125846	-0.0152664	0.0204465	0.0216824	-0.00995263	0.0330016	0.00127483	0.0126653	-0.00714106	0.0243997	0.0314513	0.00553024	0.00123942	-0.000696672	0.0375225	0.0346773	-0.0120165	-0.0100765	0.0166698	-0.0203733	-0.026329	5.32265e-05	0.0256201	0.0282918	-0.0278592	-0.0314732	0.0230513	0.027171	-0.041157	0.0591022	0.0195529	-0.0307753	-0.00216898	-0.00611543	0.0396199	-0.0716763	0.0374453	0.0628086
R	CGG	0.013025	0.0173741	0.0269535	0.0154912	0.0154361	-0.0025763	-0.0108728	0.0155914	0.0233044	0.0157218	0.0113944	-0.000953236	0.0103301	0.0220477	0.0330297	0.0160934	0.0144216	0.0195674	0.0321627	0.0184485	0.0124353	0.0139956	0.0173596	0.0196804	0.0112785	0.0267085	0.0401578	-0.0184377	0.00744567	-0.00325817	-0.0366928	0.00417292	0.0117112	0.0268159	0.0311369	0.0148701	0.00932169	0.0278953	0.000235013	0.0382953	0.0273374	0.00841461	0.0316164	0.0354543	0.032381	0.00453592	-0.0144837	0.0355068
S	TCC	0.00295251	0.00707509	0.0148873	-0.0106041	0.00804448	0.0314859	-0.0263572	0.00989394	-0.00273496	0.00827905	0.0231513	0.0137441	0.00656321	0.0143532	0.00619288	0.000893695	-0.00466371	0.00267526	8.89494e-05	-0.000433896	-0.00681096	0.00202421	0.00399162	0.0132179	0.0467423	0.0512948	-0.0412137	-0.018239	0.0129698	-0.00286716	-0.0213672	0.00805308	0.0108925	0.007372	0.0336444	0.0211216	0.0198176	0.0355353	0.0151282	0.000600142	-0.00278433	0.0440731	0.00437828	0.0238971	-0.0119179	0.00154218	0.0220527	-0.0025743
S	TCT	0.00951695	0.0082121	0.00487584	0.0027719	0.000293019	-0.00855903	0.0281005	0.00024057	0.0067219	0.00597016	0.0116042	0.0167325	0.0122148	0.0369312	-0.000837663	0.0113309	0.0058854	0.0122491	0.0160233	0.0169972	0.0199596	0.00557153	-0.0221306	0.00089832	0.0111593	0.054762	0.0210778	0.0151788	0.0141582	0.00779288	0.0236369	0.0286159	-0.00570934	0.0261477	0.00769395	0.0369302	0.0142879	0.0060091	-0.0185097	0.0396411	0.0135856	-0.0074683	0.00733917	0.00480429	-0.0140369	0.00040929	0.0129095	0.0256701
S	TCA	0.010062	0.0110273	0.0464629	0.00236543	0.0264345	0.0106203	0.00836951	0.006546	0.0223432	-0.00141412	0.0501579	0.00803808	0.0154296	-8.44306e-05	0.0339105	0.0186524	0.008711	0.0088845	-0.00171585	-0.0104604	-0.0182569	0.0244066	0.0324673	-0.0105777	0.0110682	0.00667394	-0.0128334	0.0160293	0.0461322	0.0264573	0.00865531	0.0387683	0.0342517	0.0208785	0.0365636	0.0167367	0.00138037	0.012183	-0.011393	0.0369208	-0.00365728	0.0882547	0.0696885	0.0609863	-0.0048376	0.0105071	0.00388964	-0.0191692
S	TCG	0.0107506	0.019406	0.0198353	0.00100999	-0.00834684	0.0315081	-0.00047821	-0.00233035	-8.789e-05	0.0214131	-0.0196546	-0.000963638	0.0101243	0.00834151	0.011559	-0.00254682	0.000208587	0.0115532	0.0390618	0.000847798	0.0384067	0.00444734	0.0262268	-0.0142054	0.0107163	-0.0122169	-0.0589247	0.0253879	0.0156704	-0.00209415	-0.0377526	0.0306506	0.0260238	0.014729	0.0152622	0.035289	0.0486086	0.00901518	0.0520855	0.0299123	0.0373763	0.0131136	0.0234996	0.0311392	0.0135297	0.00157875	0.00339623	0.0409635
F	TTC	0.00916632	0.0332492	0.0166967	-0.00705353	-0.00492257	0.00409757	-0.0514686	-0.00951882	0.0423329	0.012631	0.0274394	0.0158648	0.027561	0.0399989	0.0028211	-0.00174673	0.024316	0.0131488	-0.00990194	0.0261136	0.0280157	0.0314627	0.0309307	0.00810516	0.0240078	0.00787612	-0.0628378	0.0582626	0.0137137	-0.0133952	0.00568638	0.0416344	0.0314212	0.0110499	-0.0228592	-0.0185251	0.0253403	0.0343609	0.00241785	0.0266056	0.0420888	0.00281824	0.0259996	-0.00859306	0.00358505	0.0278956	0.0186039	0.00789303
F	TTT	0.0283994	0.0182402	0.045889	-0.0100596	-0.00359397	0.041308	0.0113882	0.016431	0.0292232	0.0125189	-0.0169739	0.010958	-0.00256619	0.0276676	-0.0113471	0.00886239	0.00279795	0.0423615	0.0421861	0.0225488	0.0359665	0.00409022	0.0506744	0.0281349	0.0280945	0.0342844	0.00246015	0.00217664	-0.023652	0.0190008	0.0741062	0.0202497	0.0248129	0.0343991	0.0383188	0.0420988	0.0159364	-0.0400603	-0.0215806	0.00957361	0.03101	0.0449879	-0.0533183	0.0328498	-0.0192093	-0.0139922	0.0145785	0.0166985
L	TTA	0.0180644	0.0170589	0.0124758	0.0275647	0.00511321	0.0337973	0.062241	0.0358416	0.0486703	0.0481109	0.0758238	0.0266688	0.0180451	0.00655905	0.0465918	0.0325689	0.0234223	0.0017115	0.0289093	0.00506513	-0.0154305	0.0254119	0.0361571	0.0107251	-0.00210975	-0.0259175	-0.0427854	0.00136828	-0.00141873	0.0166732	0.00794893	0.0271301	0.0271676	0.0217502	0.0300197	0.0330537	0.0590026	0.073197	0.0489412	0.0334062	0.0338889	0.0189169	0.0300415	0.0951792	-0.0272848	0.0175946	0.0841172	0.0891556
L	TTG	0.0200506	0.0410737	0.0340099	0.0437633	0.00866492	0.0245932	-0.0234786	0.0415737	0.0225139	0.0276638	0.0684294	0.0161383	0.00378595	0.0235049	0.0511232	0.028935	0.0147616	0.0372257	0.00878216	0.0171376	0.0183218	0.0250009	-0.0495444	-0.0221464	0.00228023	0.0281229	0.0152565	0.0294702	0.0220688	0.0218232	-0.0336921	0.0394354	0.0049519	0.00105838	0.0275206	0.0260191	0.0348913	-0.00581126	0.0400474	-0.00575304	0.0278658	0.0501743	0.0828549	0.0713324	0.0496818	0.0381547	0.0983888	0.0324398
Y	TAC	0.00725091	0.00673444	0.020792	0.00284782	-0.0024365	0.0235357	-0.0115718	0.00892382	0.0160556	-0.00466429	0.0190357	0.0212367	-0.0172451	0.00606627	0.0189134	0.00639691	0.00712816	0.0242344	0.0156326	-0.00429664	0.0225065	0.0186459	0.00941652	0.0483492	0.037367	0.0690803	0.0675503	0.0989181	-0.00312677	0.0463196	0.0921894	0.0458399	0.00861403	0.0268831	0.0227435	-0.00837825	0.0182112	0.027861	0.0416222	0.012469	0.0279737	0.0725625	0.0838578	0.0193629	0.0511621	0.0100444	0.016291	0.0525752
Y	TAT	0.0181018	0.00687095	0.0452872	0.0200394	0.0204103	-0.0217084	-0.0164571	-0.026514	0.0105758	-0.00837374	-0.00539828	0.0134524	-0.00347482	0.0345419	-0.0190566	-0.0021887	0.00762241	0.0130418	-0.011523	0.00741289	0.0363688	0.0303447	0.0251643	0.0136479	0.025105	-0.0262854	-0.00576929	-0.00509518	-0.0167462	-0.00894487	-0.0213941	0.0380291	0.000935033	0.00183329	0.0383174	-0.0160542	0.0296716	0.051417	-0.0147559	-0.0128212	0.0325767	0.0219904	0.0242402	0.0522126	0.0269502	0.0113914	0.0550551	0.0813998
*	TAA	N/A	N/A	N/A	N/A	N/A	N/A	N/A	N/A	N/A	N/A	N/A	N/A	N/A	N/A	N/A	N/A	N/A	N/A	N/A	N/A	N/A	N/A	N/A	N/A	N/A	N/A	N/A	N/A	N/A	N/A	N/A	N/A	N/A	N/A	N/A	N/A	N/A	N/A	N/A	N/A	N/A	N/A	N/A	N/A	N/A	N/A	N/A	N/A
*	TAG	N/A	N/A	N/A	N/A	N/A	N/A	N/A	N/A	N/A	N/A	N/A	N/A	N/A	N/A	N/A	N/A	N/A	N/A	N/A	N/A	N/A	N/A	N/A	N/A	N/A	N/A	N/A	N/A	N/A	N/A	N/A	N/A	N/A	N/A	N/A	N/A	N/A	N/A	N/A	N/A	N/A	N/A	N/A	N/A	N/A	N/A	N/A	N/A
C	TGC	0.00686624	0.00333863	0.0213338	-0.00274434	0.0332914	0.00322065	0.0242678	0.0109445	0.0055719	0.0426555	-0.0172607	0.0160686	0.00871016	-0.00891149	0.0338743	0.0132582	0.0121157	0.0438115	-0.00120143	0.0189403	-0.00958614	0.0263835	0.00330495	0.01526	0.0187698	0.0352444	0.0717106	0.0232885	-0.00567247	0.0175328	0.0437264	0.0436582	0.0153652	-0.0060199	0.0219943	0.0144827	0.0408078	0.0232634	0.0791632	-0.0106402	0.0568327	0.0417157	0.0419782	0.0589739	0.0300909	0.0227759	0.0277908	0.0251894
C	TGT	-0.0232308	-0.00618191	0.027962	0.0132984	0.00933921	0.0126737	0.0140745	0.00389041	0.0185594	0.0234057	0.0116495	0.005748	0.0199987	0.00195554	-0.0110195	0.00474915	0.0098349	0.0273864	-0.0129265	0.0419472	0.00429771	0.0276094	0.0223991	-0.0158275	0.0190474	-0.013808	0.0476809	0.0255615	0.024069	0.0226407	0.0336404	-0.0127816	0.0278897	0.0567613	0.0850196	-0.0482947	0.0143127	0.0459277	0.051156	0.0135785	0.00887045	0.0019924	0.0393009	0.0550441	0.0302379	0.0559133	-0.0461027	0.0252531
*	TGA	N/A	N/A	N/A	N/A	N/A	N/A	N/A	N/A	N/A	N/A	N/A	N/A	N/A	N/A	N/A	N/A	N/A	N/A	N/A	N/A	N/A	N/A	N/A	N/A	N/A	N/A	N/A	N/A	N/A	N/A	N/A	N/A	N/A	N/A	N/A	N/A	N/A	N/A	N/A	N/A	N/A	N/A	N/A	N/A	N/A	N/A	N/A	N/A
W	TGG	-0.00913028	0.0128493	0.00511301	-0.00127641	0.00894005	0.0063589	0.0321521	-0.00045681	-0.00204663	0.00678468	0.0152831	0.00873247	0.0202045	0.0302409	0.0329467	0.0246667	0.00815576	0.0276504	0.0551401	0.0247109	0.0269795	0.00528406	0.0125697	0.00526099	0.0325551	0.0259537	0.0300439	0.0353466	0.00916274	-0.0221192	-0.0220157	0.0135808	0.0328755	0.0172863	0.0182168	0.0100877	-0.0139025	-0.0169177	0.0296108	-0.0103791	0.0106391	0.0263822	0.0260798	0.0144089	0.0423771	0.00730435	0.0261994	0.00831445
T	ACC	0.0171667	0.00677866	0.0213694	0.00359314	0.0233323	-0.00176704	-0.0120392	0.0182439	0.0232383	0.00451772	0.0235273	-0.000521949	0.00578058	0.0214033	0.00902301	0.0166498	0.0129512	-0.00232008	0.00762511	-0.00948979	0.00231201	0.00860146	0.00670602	0.0228879	0.0136314	0.00962454	0.0419988	0.0131186	0.0287885	-0.00769922	-0.0219952	0.0156726	-0.0100822	0.0261363	-0.00834703	0.0236148	0.0188235	0.0162281	0.0141707	-0.00335377	0.0206957	0.0413215	0.0133768	0.0126582	0.0131925	0.0128708	-0.00265169	0.0481955
T	ACT	-0.010231	0.0194188	0.0108836	-0.0184434	-0.00059274	0.00256308	0.0605188	-0.0285284	0.0209968	-0.00408522	0.00761992	0.0261524	0.011655	0.0329057	0.0419324	0.0038293	-0.0286792	-0.026844	0.0118929	-0.00063324	0.00377556	0.00501492	-0.00712513	0.016071	0.0132926	0.0492465	0.0898396	0.0249047	-0.00346043	-0.0139376	0.0487826	0.0156804	0.0533364	0.00202831	-0.0123576	0.0115899	0.0417217	0.0438337	0.0205004	-0.0224787	0.034716	0.0561563	0.0321357	0.0554343	0.0208088	0.0417833	0.0332287	0.033323
T	ACA	0.00943474	-0.010252	0.00505539	0.007358	0.00917463	0.0664686	0.0129511	-0.0144033	0.0477328	0.0133744	0.0262383	0.0157899	0.0370175	-0.0119579	0.0229385	0.0101744	0.00349555	8.50087e-05	-0.00139555	0.0206964	0.0196372	0.0233306	0.0469404	0.0316355	0.00668159	0.0264301	0.0560337	0.0124207	0.0269552	0.00195729	0.00524166	0.0351521	0.0264269	0.0270703	-0.014147	0.00265739	0.0172288	0.0490845	0.0129383	-0.008842	0.0160371	0.0157846	0.00543217	0.0316402	0.0167289	0.0290997	0.0361471	0.0109845
T	ACG	0.00672306	-0.0010501	0.00400991	0.00256227	0.00233259	0.0156059	0.0255056	0.0362445	0.0274449	0.0373615	0.028482	0.0158648	0.0146472	0.0014966	0.00695718	-0.00526866	0.00208759	0.0235513	0.0144507	0.0108835	0.00858443	0.0079116	-0.0177341	-0.00484778	-0.00989326	0.0388451	0.0145118	0.0916846	-0.0105808	-0.00611624	0.043174	0.00968835	-0.000224168	0.0337305	0.027464	0.0174532	-0.00229041	0.0193223	0.0125391	0.019798	0.0299425	0.0128395	0.00231891	0.0294468	0.00783917	0.0162781	0.0630989	0.04776
I	ATC	0.00931399	0.0313864	0.0479935	0.0124454	0.0110531	-0.00936128	-0.0158252	0.00372361	0.0169419	0.0361466	0.0311502	0.0321332	0.00837857	0.0407277	0.0514667	0.0187936	0.0119263	0.00647335	-0.0265979	0.0054936	0.0226641	-0.0142136	0.0307063	-0.00834243	0.0405656	0.0633471	0.0555521	0.157135	0.0583042	0.0287579	0.0705421	0.0469898	-0.00282901	0.00668743	0.0525033	0.0206705	0.0285572	0.0645873	-0.00826469	0.036025	0.0115646	0.0551629	0.0314761	0.015367	0.0141362	0.099386	0.0102124	0.0199233
I	ATT	0.02883	0.0034181	0.0173584	0.00805972	0.0295912	-0.00896079	0.0467883	-0.0219762	-0.0117524	0.0334348	0.0349778	0.0125066	0.0239399	0.0297253	0.0399149	0.0154394	0.00808123	-0.0328015	0.0460656	0.0112889	0.0170011	0.0408221	0.0083643	-0.0182901	0.0316723	0.0070813	0.029069	0.0463799	0.00387949	0.0383177	-0.0576614	0.0341883	-0.0235871	0.0399102	0.0383812	0.0249025	0.0429381	0.0300004	-0.0325523	-0.0140535	0.0401135	-0.00501071	0.0205148	0.0243457	0.0254451	0.029956	0.0930512	0.0465291
I	ATA	0.0196558	-0.0278766	0.00812356	0.0236416	0.0195968	-0.00300587	-0.0116172	0.0139328	0.0116016	-0.00255275	0.0542739	0.0213559	0.00022993	0.0147683	0.077479	0.00916463	0.0346034	0.0147847	0.0114211	-0.0434081	-0.0202388	-0.010339	0.0371109	0.0248857	0.0105328	-0.0404226	0.00240631	0.0119588	0.0421833	-0.0299463	0.0222722	0.050131	0.0384794	0.0426368	0.0013363	0.0563591	0.000846737	0.034141	0.0328806	0.0121281	-0.0102726	0.0108272	0.0208091	0.0385409	0.00878349	-0.0147864	0.110376	0.0869024
M	ATG	-0.0126331	-0.00495965	0.0375471	0.0158158	0.000445959	0.00311306	-0.0242202	0.0369908	0.0141317	0.0451472	0.0318629	0.0201614	0.025768	0.0462346	0.0950721	0.0226471	-0.012888	0.0213436	0.0792571	0.0530832	0.0509635	0.0265118	0.00601834	0.048269	-0.0144409	0.0347858	0.106011	0.0160393	0.0631888	0.0095434	0.00908775	0.0346097	0.0357196	0.0417554	-0.00568671	0.0479303	0.0248465	0.0235203	0.084887	0.011816	0.0546823	-0.0252188	0.0801729	0.0224506	0.0171699	0.0597057	0.0469895	0.0333403
N	AAC	0.0112026	0.0234273	0.0311429	0.0132169	0.0204792	0.0112753	-0.000700393	0.0156827	0.00312497	0.0286162	0.0393896	0.0209	0.00596389	-0.0199558	0.0404133	0.000805465	0.0154871	-0.0101124	0.037283	0.00376225	0.00646386	0.0393632	-0.00609862	0.0169625	-0.00017392	-0.0081893	0.100903	0.0626526	0.0110152	0.0390601	-0.0445776	0.0310079	0.0295556	0.0198275	-0.00556296	0.0269492	0.0323753	0.033363	0.00701647	0.00194002	0.0219106	0.0130269	0.0455795	0.0484417	0.0377499	0.0147453	0.0803301	0.0262189
N	AAT	-0.00196887	-0.00808032	0.0206423	-0.020337	0.00133726	0.0278907	0.03689	0.0222086	-0.00230826	0.0578693	0.0159945	-0.000955143	0.0111251	0.00136921	0.0131744	-0.0101508	0.00397421	0.0253367	-0.0237882	-0.0109761	0.00739142	0.00163392	-0.011882	-0.0368844	-0.0178358	-0.00802582	-0.010494	-0.0059955	-0.0105065	0.0205481	0.0750207	-0.00819741	0.0175837	0.0275749	0.0103728	0.0614238	0.0196298	0.0406975	0.0671345	0.0168693	-0.000978442	0.0331515	0.0621704	0.0355105	0.023581	0.0286328	0.0655346	0.0265145
K	AAA	0.0319114	0.0127663	0.00992475	0.00884672	0.025732	0.0932467	-0.00237126	0.0150749	0.0292603	0.0448868	0.0120213	0.00813788	0.0187677	0.0227444	0.0406147	0.0129243	0.0144116	-0.0114463	0.0480013	0.0128837	0.00999378	0.0270038	-0.03216	-0.0123258	-0.000972255	0.0198256	-0.00278524	-0.0311473	-0.0238099	-0.000797556	0.0156099	0.0302204	0.0327509	0.0340606	0.0342969	0.039396	0.0290249	0.0715385	-0.0108905	0.0502883	0.00109034	0.0311622	0.0770278	0.0496537	0.00335045	0.0451654	0.0535545	0.0334516
K	AAG	0.0069033	-0.000245125	0.0177481	-0.017942	0.0128112	-0.00693785	-0.0251283	-0.00240855	0.000800577	0.0203998	0.0257539	0.0103258	0.0110691	0.0593048	-0.00183972	-0.0079237	-0.000478439	-0.000919149	-0.000652827	0.0200341	-0.0167796	0.0127728	-0.00846406	0.00939533	0.0212631	-0.0196633	0.0227317	0.0209816	0.034061	-0.0208838	0.0298134	0.0246005	0.0340769	0.00411831	0.00827124	-0.0400648	-0.0336654	-0.00633911	0.0383465	0.0529118	0.00750798	0.028455	0.0239131	-0.00183166	0.00230776	0.0668034	0.00214639	0.0398264
S	AGC	0.00755209	-0.0120662	0.0236717	0.00548226	0.0160635	0.0246402	0.0226723	-0.000574496	0.00275625	0.0259265	0.0389083	-0.0076603	0.00139064	0.025466	0.0304162	0.00366266	0.00113165	0.0366336	0.0255879	0.0168666	-0.00234145	0.0143829	0.0146713	0.00409975	0.0551558	-0.00492005	0.00521437	-0.0387289	-0.0140194	-0.00643385	-0.0332671	0.0212938	0.0254583	0.016476	0.0611437	0.0223252	0.0133335	-0.0164368	0.00721682	0.000712971	0.0108827	0.0720843	0.0308522	0.0351608	0.0265175	-0.000748178	0.0439534	0.0249893
S	AGT	-0.0211594	0.00936274	0.00297505	0.0203107	-0.0233676	0.0155073	0.0282394	-0.0131427	-0.000994009	-0.00228178	0.00897366	0.0157982	0.0131499	0.0289749	0.0142942	0.00795891	-0.00321688	0.00858029	0.000595809	0.00588402	-0.00539312	-0.0153936	0.0609145	0.0044468	0.0116301	0.0387935	0.0597187	0.0130824	0.00160403	0.0356511	-0.0138461	-0.0170219	-0.0113165	0.00949431	0.0060245	-0.00662138	0.0404713	0.00283714	-0.0141718	0.0402447	0.00188832	0.0149346	0.0664552	-0.0131048	0.0321026	0.0581502	0.0831915	0.0219917
R	AGA	-0.00683952	-0.000533601	-0.0125928	-0.0028473	0.0221044	-0.0147776	0.0415332	0.0150841	0.00749124	0.00452558	-0.00809968	0.0135636	-0.00896412	0.00122189	0.0166216	-0.0139057	-0.00810385	0.0131561	0.0394909	0.01264	0.00951281	-0.00370947	-0.00402619	0.0581835	0.0156787	0.0347113	0.0724543	-0.0306599	-0.01431	0.00274619	-0.0642842	0.0189805	0.00323795	0.0146779	0.00713483	0.0132228	0.0195166	0.0426105	0.0141392	-0.0269759	0.0140351	-0.00998529	0.0346949	0.00361675	0.0230175	0.000970407	0.0824485	0.060236
R	AGG	0.00633216	0.00636122	0.024346	0.00259799	-0.00572181	-0.00322218	-0.0100871	0.0101902	0.010771	0.0335044	0.0251885	0.0222891	0.0291245	0.0333686	0.0107994	0.00119551	0.0191419	0.031243	0.0323809	0.0310311	0.00171804	0.0495648	0.0104395	0.00425057	0.00180176	0.0398677	0.0420907	0.0880528	0.0157171	0.0411667	0.0233538	0.00969558	0.00163419	0.0371874	0.0327591	0.00203096	0.0106621	0.0362109	0.0550973	0.00808246	0.00410646	-0.0258958	0.0338724	0.0233994	0.00369675	0.0229671	-0.017598	0.0287746
A	GCC	0.0104459	0.00839799	0.00323355	-0.00487434	0.0120971	5.07054e-05	-0.0190875	0.00850094	0.0176022	0.0036024	-0.0003949	0.0188562	0.00462305	0.0172997	0.0202394	0.00233989	0.00368652	-0.0127422	0.0223065	0.00270282	0.00987716	0.0175774	0.0137051	0.00997912	0.026045	0.0145093	-0.0193971	0.0232149	-0.00653948	-0.00743106	-0.0155871	0.0233864	0.0133995	0.0221389	-0.00510417	0.00724899	0.0212273	0.0365059	0.0475915	0.0177913	0.0230461	0.0352397	0.0530378	0.0180007	0.00820816	0.0347322	0.0169186	-0.00722104
A	GCT	0.006467	0.00896337	0.0027955	-0.00146813	0.00200572	0.00611061	-0.0091902	0.0214773	0.0124278	0.0364786	0.00207469	0.00446695	0.0159022	0.00318873	0.0299888	0.0185442	0.00176907	-0.00991265	0.0201186	0.0161953	0.0386598	-0.0099891	0.00141431	0.00969055	0.00084659	0.0296215	0.0155863	-0.0368106	0.0076578	-0.0145196	-0.0170493	0.0116094	0.00906155	-0.00691792	0.00578676	-0.00660997	0.00491321	0.00494987	0.0145417	0.0209731	0.0283893	0.00560287	0.038343	0.0288736	0.0309123	0.0102022	0.0779693	0.00206055
A	GCA	0.0137721	0.00715684	-0.000616162	0.00352103	0.0185472	0.00997676	-0.0281327	0.0151837	0.0156162	-0.01513	0.0295944	0.0197624	0.0174221	0.0174964	0.0213048	0.0096433	0.023078	0.0214145	0.0264646	0.000160686	-0.0044618	0.0286334	0.00743372	0.0411054	0.0112696	0.00830982	-0.0355765	0.0268147	0.0208553	0.0207771	-0.0244033	0.0246827	0.0240896	0.00902848	0.0200094	0.0207131	0.00674304	0.0526656	0.0628602	0.0541408	0.0470227	-0.00158492	0.0503704	0.0271694	0.0119256	0.0123367	0.0285201	0.026216
A	GCG	0.00504585	0.0102814	0.0142236	0.00659679	-0.00361106	0.0223462	-0.0214289	0.000643422	0.00858309	0.0236623	0.0242091	0.0188077	0.0168038	0.0196314	0.0422242	0.00188836	0.0108491	0.0163837	0.0145938	-0.000744132	9.82537e-05	0.0184927	-0.00348041	-0.00266197	0.0145811	0.0265772	-0.0622492	0.00804996	0.00793727	-0.0133273	-0.0430375	0.00721209	0.00061067	0.0122271	0.0201769	0.00452355	0.0133561	0.0227742	0.0369706	0.00299952	0.0232469	0.0369798	-0.0137822	0.0163629	0.0207341	0.00756908	-0.0251923	0.010199
V	GTC	0.0190115	-0.000571356	0.00736738	0.0102654	0.0156393	0.00569947	0.0280705	0.00283801	-0.0036919	-0.0107119	0.0256238	0.02688	0.00741834	-0.00834225	0.026825	0.016732	0.030912	0.00592607	-0.00182044	-0.00829042	0.0215582	-0.0316237	-0.0151731	0.0423365	0.0158279	-0.00154534	0.00544344	0.0542677	0.0203329	0.0162846	0.0608394	0.0236437	0.0310429	0.0264711	-0.019471	0.00190281	0.0108492	0.0540122	0.00764364	0.0297432	0.0456434	0.0327067	0.0212028	0.0195461	-0.000937708	-0.000185097	0.00917391	0.00170973
V	GTT	0.0162996	0.00780453	-0.00835398	0.016832	0.0179588	-0.0022405	-0.0186248	-0.00666218	0.015589	0.0391096	0.0036482	0.00208466	0.0116848	0.00975782	0.0487359	0.0123229	4.3071e-06	0.015752	0.00229119	0.019259	0.00244512	0.0175148	0.0222093	0.0220002	0.0127668	0.0512742	0.0903139	-0.0145635	-0.00748504	0.0351577	-0.0184545	0.0372514	0.0106508	0.0447084	0.00686179	0.0397204	-0.00567054	0.0264123	0.00383999	-0.0145747	0.024904	0.0125532	0.0204029	0.0530578	0.0312249	-0.0190055	0.032858	-0.0104462
V	GTA	-0.00299674	0.0249587	0.00780392	0.0143994	0.0252946	-0.0265602	-0.00778582	0.0235409	0.0378505	-0.0221815	-0.00559101	0.0228145	0.0472337	-0.00830205	0.0599312	0.0225008	0.0326011	0.019043	0.0129679	0.0114538	0.0362394	0.0247768	0.0994302	0.0515774	0.0161268	0.0530161	0.124282	0.029779	0.029196	0.00391725	0.0241379	0.0368289	0.00915477	0.0333538	0.0243809	0.00087724	0.0661808	0.0538734	0.0270426	-0.0102826	0.0696598	0.0137011	0.0624735	0.0512617	0.0384619	0.0147256	0.105261	0.0636813
V	GTG	0.00379599	0.0279571	0.00259145	0.0096359	0.0253826	0.022045	-0.0386893	-0.00397605	-0.0165206	0.0173228	0.00612438	-0.00373313	0.0291897	0.0194829	0.0367446	0.0135648	0.00480605	-0.000666044	0.0191197	0.0484118	0.00150128	0.0143994	0.0541747	0.0156615	-0.00261023	0.0330212	0.0463001	0.042901	0.0205545	0.00117113	-0.0369888	0.0185829	0.0159815	0.00804443	0.0135912	-0.00640606	0.0124295	0.0363845	0.0462388	-0.00147965	0.047842	0.00871974	0.0622036	0.0311677	0.00163418	-0.0178466	0.039296	0.0340663
D	GAC	0.012668	0.0317093	0.0111596	0.011852	0.0209507	0.00448569	-0.00366446	0.0257245	0.0175624	0.0183251	0.0457932	0.03593	-0.000459139	0.01196	0.0363276	0.0166581	8.08524e-05	-0.00516079	-0.0263987	-0.0157159	0.00738988	0.00949158	0.0161915	0.0148457	0.00292306	-0.0144403	0.0193911	0.046837	0.00862828	0.00517645	0.0570125	0.0180757	0.0222021	0.0160444	0.0558533	0.0236972	0.024464	0.0260296	-0.0225701	0.0268592	0.0283177	0.0765659	0.0538763	0.0336187	0.0329383	0.0203473	-0.00108013	0.00284329
D	GAT	0.00415496	0.015801	0.0253613	0.0158794	0.0404869	0.0151222	-0.0465732	-0.00484044	0.00287079	-0.00712548	0.0233208	0.0117379	0.0355484	0.0577757	0.015177	0.00456261	0.00241956	0.0177652	0.0166696	-0.0113824	-0.0184031	0.0357084	-0.0165645	0.0344826	0.0322591	0.074393	0.0840374	0.0211359	-0.0127777	0.0083111	0.118393	0.0687522	0.0330708	-0.00785835	0.0185102	0.00840816	0.00931391	0.0406981	0.0203066	0.00415029	-0.0246663	0.0140479	0.0194399	0.0312874	0.0200175	0.0205522	0.117457	0.0342724
E	GAA	0.00428188	0.0120968	0.00230315	0.00690523	0.0170996	0.0199262	-0.00191363	0.0346319	0.0233888	0.0240633	-0.0425247	-0.0154142	0.0271438	-0.0210465	0.0411233	-0.00228663	0.012625	0.0223663	0.0290232	0.00390577	-0.000707136	-0.0122943	-0.0296992	0.0197862	0.0211428	-0.0115509	0.0616683	0.0330275	0.0397973	-0.0307843	-0.00432295	0.0128421	0.00983574	0.0119833	0.0255836	0.0102543	0.0356469	0.0175914	0.0578638	0.0455509	0.0106456	0.0416997	0.0510123	0.035749	0.0353235	0.0614922	0.0425308	0.0430412
E	GAG	0.008551	-0.0143746	0.0285663	0.00195416	0.000485458	0.0304768	0.0190276	-0.00807554	0.00192601	0.0450963	-0.00934008	-0.0142695	-0.00176696	-0.00968796	0.0506645	-0.00687651	0.00632917	0.0166831	-0.0218978	-0.0164869	-0.00956463	0.0327824	0.0377897	0.0362487	-0.00177426	-0.023162	0.0333119	0.0259247	-0.00656908	-0.0215262	-0.0500601	0.0316956	0.040259	0.0275027	0.0369799	0.0409972	0.00270406	-0.0326718	-0.0061423	0.018293	0.0335223	0.0214807	0.00115877	0.0474319	0.00408336	-0.0562312	0.0278665	-0.00583116
G	GGC	0.0121939	-0.00315269	0.022241	0.0179315	0.0109219	0.0135886	0.0101499	0.00372114	0.0160365	0.00846662	0.0156731	0.0217166	0.00969321	0.0214133	0.0196328	0.00846227	0.0104875	0.0325336	0.0150021	0.0105669	0.0172984	0.00116809	-0.00033841	0.0208503	0.0382786	-0.00823996	-0.0113046	-0.021006	0.00695318	0.01389	-0.0262403	0.0158401	0.0339341	0.0115256	0.010445	0.0180772	0.0276333	0.034603	0.0132826	0.0117429	0.0332644	0.000934147	0.0165113	0.0468478	0.0296678	-0.0163371	0.0262513	0.0360078
G	GGT	0.00858977	0.0199319	0.0270709	0.00928145	0.0257898	-0.000240328	-0.041576	0.0131089	0.00831112	0.028417	-0.0075177	0.02608	0.0213834	0.0239613	0.019504	0.00541302	0.00695289	0.0166615	0.00844258	0.0106566	0.0188071	0.0128227	0.00067271	0.0135851	0.00350845	-0.0175854	-0.0538893	0.0299904	0.00492759	0.0259065	0.00602826	0.00148811	0.0239847	0.00676457	-0.0254903	0.0351201	0.0191454	0.0242641	0.0598574	0.0124108	0.0540192	-4.88464e-05	0.0148291	0.00240116	0.0165397	0.0256325	-0.00660945	0.018398
G	GGA	0.0013684	0.0197652	-0.0101745	0.0186739	0.0107002	-0.0124097	-0.00336984	0.00424905	0.00796578	0.0168699	0.0265369	0.0306651	0.011957	-0.0203636	0.0213327	0.0209105	0.00278309	0.012198	0.0130739	-0.0125	0.0530386	0.0555569	0.00993236	-0.00402599	0.0204925	0.0327878	-0.00225792	0.000666294	-0.00455975	0.0203952	0.0143291	0.0258688	0.0216484	-0.00213056	0.0242217	0.0323341	-0.001498	0.079224	0.0655815	0.0309758	0.0300614	0.0286212	0.0327607	-0.00364129	0.00917247	-0.000522285	0.0713468	0.0224763
G	GGG	0.0143335	0.0157101	0.0257848	0.0115702	0.0056448	0.00177583	0.0197374	0.0142935	0.0326483	0.0036291	0.00940667	0.0125434	0.0111227	-0.00226095	0.0329661	0.019842	0.0206942	0.0351219	0.0176279	0.0074596	0.0111448	0.0194891	0.0122928	0.0137952	0.00340013	-0.00498175	0.0191469	-0.0482997	-0.0234789	0.000865649	0.0338544	-0.00409278	0.0263438	0.0339499	0.0281508	0.0102633	-0.00222662	0.0158552	0.0394915	-0.0103073	0.0218683	0.0460119	0.0509965	0.0168127	0.00776221	-0.0247437	0.0389542	0.0072523
[truncated: 214 more columns]

## Sheet: P-value for 2D codon heatmap
P-values for shuffled datasets exceeding experimental data of 2-dimensional representation of stalling propensities with the corresponding codons located in the P- and A-sites
P\A		Codons located in the A-site
		CCC	CCT	CCA	CCG	CTC	CTT	CTA	CTG	CAC	CAT	CAA	CAG	CGC	CGT	CGA	CGG	TCC	TCT	TCA	TCG	TTC	TTT	TTA	TTG	TAC	TAT	TAA	TAG	TGC	TGT	TGA	TGG	ACC	ACT	ACA	ACG	ATC	ATT	ATA	ATG	AAC	AAT	AAA	AAG	AGC	AGT	AGA	AGG
P	CCC	1	1	1	1	0.894317	0.94317	0.998006	0.702891	0.673978	0.948156	0.386839	0.989033	0.97009	0.948156	0.99003	0.995015	0.946162	0.614158	0.468594	0.646062	0.331007	0.109671	0.986042	0.888335	0.0309073	0.181456	1	1	0.998006	0.739781	1	0.00498504	0.98006	0.985045	1	0.998006	0.374875	0.40678	0.234297	0.168495	0.25324	0.0787637	0.448654	0.324028	0.850449	0.680957	0.578265	0.388833
P	CCT	1	0.999003	1	0.998006	0	0.741775	1	0.414756	0.0907278	0.0378863	0.00697906	0.978066	0.0418744	0.254237	0.588235	0.91326	0.785643	0.912263	0.508475	0.809571	0.409771	0.35992	0.597208	0.270189	0.869392	0.624128	0.28016	1	0.927218	0.985045	0.910269	0.132602	0.570289	0.942173	0.81655	0.147557	0.0608175	0.0199402	0.451645	0.532403	0.413759	0.56331	0.108674	0.0209372	0.143569	0.774676	0.569292	0.907278
P	CCA	1	0.881356	0.991027	0.999003	0.00697906	0.459621	0.911266	0.0747757	0.0807577	0.0428714	0.0648056	0.122632	0.674975	0.707876	0.00797607	0.372881	0.231306	0.00897308	0.107677	0.534397	0.154536	0.000997009	0.712861	0.105683	0.0667996	0.585244	0.961117	0.376869	0.674975	0.0767697	1	0	0.266201	0.0289133	0.0558325	0.977069	0.137587	0.677966	0.0458624	0.172483	0.000997009	0.783649	0	0.0967099	0.129611	0.492522	0.266201	0.908275
P	CCG	1	0.859422	1	1	0.200399	0.864407	0.895314	0.000997009	0.134596	0.00697906	0.24327	0.894317	0.696909	0.793619	0.908275	0.986042	0.0987039	0.0917248	0.19342	0.189432	0.0398804	0.303091	0.0767697	0.636092	0.272183	0.618146	0.99003	0.919242	0.909272	0.671984	0.998006	0.0199402	0.407777	0.314058	0.827517	0.404786	0.0578265	0.0508475	0.509472	0.0209372	0.194417	0.998006	0.130608	0.701894	0.550349	0.838485	0.353938	0.939182
L	CTC	0.918245	0.668993	0.438684	0.849452	0.368893	0.56331	0.568295	0.0937188	0.0917248	0.127617	0.551346	0.473579	0.612164	0.313061	0.862413	0.63011	0.742772	0.347956	0.961117	0.862413	0.539382	0.631107	0.932203	0.96012	0.554337	0.704885	0.0229312	0.322034	0.852443	0.991027	0.781655	0.0598205	0.0578265	0.56331	0.414756	0.700897	0.582253	0.225324	0.692921	0.844467	0.961117	0.973081	0.588235	0.387836	0.731805	1	1	0.205384
L	CTT	0.478564	0.64008	0.693918	0.159521	0.779661	0.949153	0.96012	0.956132	0.164506	0.75673	0.170489	0.956132	0.7667	0.551346	0.771685	0.130608	0.63011	0.239282	0.21336	0.924227	0.525424	0.839482	0.239282	0.720837	0.105683	0.419741	0.824526	0.649053	0.0658026	0.854437	0.433699	0.623131	0.623131	0.781655	0.834497	0.44666	0.567298	0.639083	0.184447	0.966102	0.774676	0.0358923	0.0388833	0.206381	0.874377	0.14656	0.544367	0.192423
L	CTA	0.886341	0.50349	0.66999	0.467597	0.714855	0.270189	0.830508	0.735793	0.864407	0.81655	0.663011	0.404786	0.98006	0.68993	0.255234	0.851446	0.628116	0.360917	0.835494	0.907278	0.952144	0.60319	0.714855	0.795613	0.433699	0.117647	0.0558325	0.0797607	0.257228	0.724826	0.681954	0.201396	0.0109671	0.480558	0.986042	0.292124	0.108674	0.366899	0.395813	0.666999	0.612164	0.490528	0.0907278	0.139581	0.483549	0.727817	0.928215	0.143569
L	CTG	0.124626	0.343968	0.797607	0.157527	0.119641	0.228315	0.354935	0.0867398	0.497507	0.0857428	0.0209372	0.0687936	0.108674	0.353938	0.0149551	0.707876	0.469591	0.0488534	0.911266	0.491525	0.494516	0.26321	0.976072	0.831505	0.295115	0.355932	0.0638086	0	0.768694	0.432702	0.0747757	0.839482	0.787637	0.759721	0.0129611	0.819541	0.858425	0.321037	0.90329	0.581256	0.0488534	0.730808	0.228315	0.196411	0.84347	0.95015	0.909272	0.915254
H	CAC	0.881356	0.642074	0.457627	0.982054	0.64008	0.427717	0.958126	0.948156	0.788634	0.348953	0.000997009	0.63011	0.367896	0.107677	0.313061	0.793619	0.189432	0.715852	0.438684	0.735793	0.0418744	0.350947	0.852443	0.779661	0.465603	0.605184	0.199402	0.395813	0.255234	0.585244	0.507478	0.0428714	0.813559	0.333001	0.0219342	0.608175	0.0797607	0.356929	0.0777667	0.492522	0.138584	0.501496	0.0618146	0.0109671	0.545364	0.184447	0.00797607	0.0727817
H	CAT	0.865404	0.0249252	0.378863	0.626122	0.215354	0.77667	0.861416	0.940179	0.120638	0.00398804	0.484546	0.270189	0.745763	0.119641	0.0837488	0.186441	0.558325	0.457627	0.355932	0.382851	0.920239	0.378863	0.582253	0.296112	0.219342	0.0797607	0.122632	0.191426	0.991027	0.621137	0.702891	0.265204	0.381854	0.364905	0.194417	0.622134	0.711864	0.474576	0.534397	0.306082	0.187438	0.184447	0.388833	0.0458624	0.0528415	0.952144	0.422732	0.000997009
Q	CAA	0.314058	0.125623	0.800598	0.550349	0.286142	0.902293	0.451645	0.880359	0.301097	0.0997009	0.684945	0.738784	0.313061	0.236291	0.39681	0.0508475	0.48654	0.664008	0.331007	0.0448654	0.149551	0.0997009	0.49651	0.795613	0.682951	0.0418744	0.465603	0.0129611	0.151545	0.121635	0.105683	0.524427	0.184447	0.638086	0.331007	0.221336	0.587238	0.0438684	0.585244	0.323031	0.188435	0.0179462	0.0977069	0.227318	0.477567	0.81655	0	0.00199402
Q	CAG	0.818544	0.955135	0.0289133	0.0977069	0.472582	0.221336	0.951147	0.250249	0.525424	0.0249252	0.312064	0.917248	0.00199402	0.281157	0.232303	0.77667	0.514457	0.663011	0.125623	0.954138	0.781655	0.289133	0.832502	0.314058	0.100698	0.87338	0.0807577	0.366899	0.344965	0.20339	0.847458	0.270189	0.556331	0.710867	0.463609	0.403789	0.18345	0.71984	0.392822	0.0677966	0.668993	0.329013	0.00299103	0.422732	0.865404	0.34995	0.0129611	0.56331
R	CGC	0.105683	0.419741	0.221336	0.907278	0.312064	0.0488534	0.742772	0.399801	0.785643	0.122632	0.277168	0.855434	0.0757727	0.673978	0.212363	0.0209372	0.821535	0.422732	0.731805	0.564307	0.0378863	0.11665	0.171486	0.718843	0.948156	0.972084	0.186441	0.0179462	0.555334	0.657029	0.805583	0.117647	0.34995	0.670987	0.0269192	0.85344	0.562313	0.956132	0.257228	0.235294	0.234297	0.144566	0.82652	0.00598205	0.48654	0.948156	0.0348953	0.519442
R	CGT	0.548355	0.102692	0.232303	0.264207	0.0917248	0.450648	0.487537	0.00398804	0.128614	0.219342	0.0229312	0.172483	0.0358923	0.0319043	0.537388	0.154536	0.66002	0.293121	0.361914	0.0518445	0.483549	0.137587	0.232303	0.975075	0.0448654	0.285145	0.966102	0.0578265	0.102692	0.425723	0.740778	0.132602	0.499501	0.482552	0.0269192	0.220339	0.417747	0.129611	0.114656	0.556331	0.200399	0.228315	0.200399	0.911266	0.555334	0.175474	0.117647	0
R	CGA	0.706879	0.0239282	0.224327	0.931206	0.700897	0.639083	1	0.910269	0.158524	0.860419	0.551346	0.956132	0.134596	0.201396	0.898305	0.0179462	0.831505	0.633101	0.904287	0.123629	0.174477	0.545364	0.570289	0.645065	0.102692	0.184447	0.761715	0.848455	0.34995	0.946162	0.98006	0.752742	0.245264	0.321037	0.998006	1	0.365902	0.353938	0.992024	0.00997009	0.517448	0.944167	0.847458	0.837488	0.0578265	1	0.155533	0.00598205
R	CGG	0.509472	0.170489	0.0468594	0.274177	0.267198	0.922233	0.94317	0.277168	0.105683	0.293121	0.588235	0.884347	0.419741	0.0648056	0.0568295	0.247258	0.235294	0.168495	0.0967099	0.319043	0.385842	0.348953	0.333001	0.257228	0.494516	0.168495	0.112662	0.977069	0.651047	0.881356	1	0.787637	0.658026	0.294118	0.158524	0.31007	0.649053	0.186441	0.791625	0.0398804	0.209372	0.611167	0.154536	0.0997009	0.0368893	0.772682	0.952144	0.0478564
S	TCC	0.918245	0.602193	0.335992	1	0.723829	0.0488534	0.976072	0.493519	0.95015	0.582253	0.283151	0.47657	0.666999	0.351944	0.627119	0.922233	0.939182	0.7667	0.767697	0.874377	0.888335	0.57328	0.609172	0.41675	0.0209372	0.0129611	0.982054	0.94317	0.306082	0.818544	0.938185	0.632104	0.649053	0.637089	0.164506	0.211366	0.230309	0.147557	0.399801	0.745763	0.824526	0.0707876	0.819541	0.189432	0.974078	0.751745	0.295115	0.871386
S	TCT	0.556331	0.515454	0.622134	0.681954	0.803589	0.733799	0.161515	0.551346	0.671984	0.589232	0.492522	0.350947	0.469591	0.0608175	0.686939	0.397807	0.615155	0.501496	0.435693	0.375872	0.17348	0.547358	0.819541	0.643071	0.505484	0.0528415	0.381854	0.309073	0.252243	0.519442	0.365902	0.120638	0.902293	0.287139	0.602193	0.122632	0.413759	0.510469	0.849452	0.0608175	0.472582	0.799601	0.631107	0.700897	0.962114	0.641077	0.478564	0.247258
S	TCA	0.654038	0.600199	0.0119641	0.744766	0.117647	0.499501	0.537388	0.616152	0.328016	0.784646	0.0767697	0.577268	0.385842	0.767697	0.109671	0.277168	0.625125	0.491525	0.704885	0.89332	0.945165	0.302094	0.350947	0.842473	0.559322	0.529412	0.755733	0.493519	0.0667996	0.325025	0.544367	0.0727817	0.0588235	0.362911	0.157527	0.498504	0.671984	0.42672	0.778664	0.0687936	0.842473	0.00199402	0.0608175	0.0279163	0.805583	0.632104	0.712861	0.987039
S	TCG	0.579262	0.25324	0.334995	0.912263	0.97009	0.0528415	0.761715	0.821535	0.838485	0.345962	0.986042	0.890329	0.469591	0.570289	0.517448	0.92323	0.859422	0.444666	0.0578265	0.795613	0.0109671	0.647059	0.37986	0.926221	0.461615	0.844467	0.998006	0.266201	0.324028	0.831505	0.996012	0.0518445	0.131605	0.490528	0.54337	0.0737787	0.00897308	0.562313	0.0618146	0.184447	0.112662	0.665005	0.491525	0.171486	0.420738	0.820538	0.779661	0.0279163
F	TTC	0.714855	0.0797607	0.415753	0.972084	0.900299	0.566301	0.991027	0.878365	0.107677	0.421735	0.242273	0.386839	0.0289133	0.0707876	0.822532	0.822532	0.197408	0.440678	0.911266	0.18345	0.211366	0.205384	0.332004	0.623131	0.230309	0.507478	0.994018	0.00797607	0.402792	0.857428	0.537388	0.0358923	0.108674	0.602193	0.973081	0.959123	0.360917	0.260219	0.682951	0.325025	0.161515	0.717846	0.43669	0.811565	0.74676	0.324028	0.521436	0.68993
F	TTT	0.0837488	0.293121	0.0687936	0.927218	0.813559	0.118644	0.413759	0.326022	0.201396	0.539382	0.890329	0.468594	0.842473	0.218345	0.894317	0.590229	0.706879	0.108674	0.124626	0.28016	0.172483	0.761715	0.189432	0.289133	0.248255	0.20339	0.535394	0.635095	0.932203	0.420738	0.0139581	0.452642	0.296112	0.317049	0.277168	0.205384	0.477567	0.948156	0.885344	0.616152	0.288136	0.214357	0.948156	0.236291	0.935194	0.859422	0.552343	0.431705
L	TTA	0.318046	0.483549	0.520439	0.182453	0.745763	0.224327	0.0987039	0.139581	0.0747757	0.0299103	0.00498504	0.19342	0.333998	0.607178	0.164506	0.0997009	0.216351	0.671984	0.27318	0.628116	0.80658	0.258225	0.342971	0.458624	0.608175	0.89332	0.948156	0.671984	0.742772	0.315055	0.571286	0.301097	0.4666	0.324028	0.264207	0.235294	0.141575	0.0747757	0.124626	0.27318	0.157527	0.383848	0.216351	0.000997009	0.941176	0.447657	0.0249252	0.0109671
L	TTG	0.27318	0.0907278	0.138584	0.00299103	0.705882	0.419741	0.928215	0.0558325	0.226321	0.270189	0.0239282	0.36989	0.782652	0.289133	0.00897308	0.182453	0.511466	0.149551	0.638086	0.335992	0.287139	0.0269192	0.973081	0.969093	0.592223	0.415753	0.497507	0.314058	0.332004	0.206381	0.984048	0.0299103	0.785643	0.742772	0.358923	0.256231	0.33998	0.758724	0.185444	0.821535	0.420738	0.0907278	0.00997009	0.0239282	0.0418744	0.155533	0.000997009	0.138584
Y	TAC	0.59322	0.655035	0.374875	0.687936	0.822532	0.346959	0.841476	0.70987	0.309073	0.738784	0.373878	0.285145	0.985045	0.528415	0.333001	0.599202	0.658026	0.287139	0.401795	0.842473	0.283151	0.535394	0.606181	0.152542	0.103689	0.0209372	0.0827517	0	0.749751	0.0707876	0.00598205	0.0169492	0.516451	0.316052	0.420738	0.937188	0.376869	0.227318	0.256231	0.477567	0.362911	0.0309073	0.00398804	0.286142	0.0478564	0.569292	0.534397	0.0329013
Y	TAT	0.272183	0.49651	0.0259222	0.303091	0.260219	0.865404	0.7667	0.948156	0.585244	0.824526	0.767697	0.45663	0.860419	0.124626	0.9332	0.807577	0.64008	0.448654	0.75673	0.47657	0.0777667	0.192423	0.222333	0.469591	0.271186	0.936191	0.716849	0.706879	0.930209	0.691924	0.860419	0.0687936	0.721834	0.531406	0.229312	0.941176	0.231306	0.17348	0.805583	0.767697	0.28016	0.32004	0.411765	0.110668	0.199402	0.511466	0.0957129	0
*	TAA	N/A	N/A	N/A	N/A	N/A	N/A	N/A	N/A	N/A	N/A	N/A	N/A	N/A	N/A	N/A	N/A	N/A	N/A	N/A	N/A	N/A	N/A	N/A	N/A	N/A	N/A	N/A	N/A	N/A	N/A	N/A	N/A	N/A	N/A	N/A	N/A	N/A	N/A	N/A	N/A	N/A	N/A	N/A	N/A	N/A	N/A	N/A	N/A
*	TAG	N/A	N/A	N/A	N/A	N/A	N/A	N/A	N/A	N/A	N/A	N/A	N/A	N/A	N/A	N/A	N/A	N/A	N/A	N/A	N/A	N/A	N/A	N/A	N/A	N/A	N/A	N/A	N/A	N/A	N/A	N/A	N/A	N/A	N/A	N/A	N/A	N/A	N/A	N/A	N/A	N/A	N/A	N/A	N/A	N/A	N/A	N/A	N/A
C	TGC	0.77667	0.744766	0.168495	0.928215	0.0259222	0.625125	0.33001	0.492522	0.745763	0.0259222	0.938185	0.362911	0.651047	0.919242	0.115653	0.497507	0.430708	0.0378863	0.761715	0.361914	0.835494	0.255234	0.655035	0.351944	0.469591	0.12662	0.0388833	0.229312	0.951147	0.348953	0.0498504	0.00797607	0.495513	0.889332	0.427717	0.55334	0.0997009	0.35992	0.0109671	0.929212	0.0209372	0.134596	0.114656	0.0219342	0.0957129	0.34995	0.19342	0.18345
C	TGT	0.999003	0.781655	0.194417	0.403789	0.560319	0.363908	0.499501	0.56331	0.33001	0.210369	0.525424	0.598205	0.279163	0.649053	0.904287	0.690927	0.510469	0.163509	0.909272	0.0588235	0.538385	0.184447	0.302094	0.91326	0.239282	0.876371	0.0977069	0.247258	0.296112	0.390828	0.181456	0.878365	0.19342	0.0329013	0.00299103	1	0.405783	0.107677	0.0897308	0.465603	0.499501	0.646062	0.141575	0.0518445	0.122632	0.0757727	0.985045	0.283151
*	TGA	N/A	N/A	N/A	N/A	N/A	N/A	N/A	N/A	N/A	N/A	N/A	N/A	N/A	N/A	N/A	N/A	N/A	N/A	N/A	N/A	N/A	N/A	N/A	N/A	N/A	N/A	N/A	N/A	N/A	N/A	N/A	N/A	N/A	N/A	N/A	N/A	N/A	N/A	N/A	N/A	N/A	N/A	N/A	N/A	N/A	N/A	N/A	N/A
W	TGG	0.999003	0.463609	0.725823	0.937188	0.512463	0.525424	0.108674	0.821535	0.884347	0.644068	0.510469	0.65005	0.178465	0.0757727	0.155533	0.0987039	0.658026	0.138584	0.0239282	0.2333	0.12662	0.58325	0.492522	0.54337	0.105683	0.228315	0.164506	0.100698	0.531406	0.966102	0.928215	0.402792	0.127617	0.520439	0.450648	0.66002	0.96012	0.919242	0.198405	0.880359	0.663011	0.177468	0.277168	0.407777	0.0438684	0.556331	0.299103	0.666999
T	ACC	0.240279	0.649053	0.24327	0.707876	0.231306	0.824526	0.906281	0.19342	0.142572	0.675972	0.288136	0.798604	0.733799	0.131605	0.622134	0.24327	0.365902	0.792622	0.638086	0.935194	0.711864	0.607178	0.578265	0.325025	0.294118	0.581256	0.0837488	0.372881	0.0737787	0.902293	0.98006	0.419741	0.985045	0.294118	0.935194	0.151545	0.35992	0.464606	0.656032	0.788634	0.313061	0.0877368	0.56331	0.519442	0.405783	0.440678	0.827517	0.0159521
T	ACT	0.968096	0.216351	0.508475	0.997009	0.773679	0.658026	0.0299103	0.994018	0.348953	0.767697	0.643071	0.0827517	0.37986	0.0907278	0.0368893	0.740778	0.999003	0.986042	0.550349	0.75673	0.483549	0.655035	0.66999	0.281157	0.502493	0.0707876	0.00598205	0.224327	0.777667	0.797607	0.0658026	0.327019	0.00797607	0.763709	0.832502	0.517448	0.124626	0.151545	0.347956	0.940179	0.245264	0.0837488	0.27318	0.0259222	0.530409	0.208375	0.194417	0.0977069
T	ACA	0.700897	0.940179	0.737787	0.716849	0.585244	0.00299103	0.522433	0.897308	0.00997009	0.381854	0.246261	0.297109	0.0249252	0.968096	0.326022	0.579262	0.661017	0.692921	0.747757	0.211366	0.309073	0.33001	0.0917248	0.230309	0.522433	0.199402	0.0358923	0.479561	0.151545	0.707876	0.619143	0.100698	0.266201	0.326022	0.965105	0.742772	0.279163	0.0887338	0.560319	0.81655	0.490528	0.41675	0.611167	0.252243	0.391825	0.189432	0.144566	0.625125
T	ACG	0.66999	0.824526	0.714855	0.778664	0.742772	0.439681	0.282154	0.0179462	0.113659	0.0408774	0.221336	0.323031	0.384845	0.769691	0.733799	0.953141	0.770688	0.333001	0.364905	0.545364	0.485543	0.532403	0.889332	0.811565	0.886341	0.122632	0.521436	0	0.928215	0.860419	0.0598205	0.528415	0.888335	0.161515	0.238285	0.304088	0.798604	0.48654	0.515454	0.367896	0.130608	0.495513	0.618146	0.186441	0.571286	0.44666	0.0179462	0.00997009
I	ATC	0.512463	0.0717846	0.0159521	0.428714	0.415753	0.89332	0.86341	0.668993	0.389831	0.0518445	0.180459	0.167498	0.661017	0.0338983	0.00598205	0.267198	0.559322	0.70987	0.957129	0.579262	0.384845	0.778664	0.357926	0.793619	0.10668	0.0169492	0.0608175	0	0.00398804	0.185444	0.0219342	0.0957129	0.885344	0.711864	0.0338983	0.463609	0.161515	0.0309073	0.807577	0.15653	0.457627	0.0378863	0.179462	0.402792	0.507478	0.000997009	0.65005	0.387836
I	ATT	0.0677966	0.686939	0.493519	0.607178	0.142572	0.769691	0.115653	0.952144	0.930209	0.0967099	0.143569	0.372881	0.127617	0.130608	0.0508475	0.377866	0.536391	0.931206	0.11665	0.484546	0.274177	0.179462	0.487537	0.80658	0.174477	0.437687	0.246261	0.100698	0.642074	0.0847458	0.986042	0.123629	0.94317	0.195414	0.125623	0.204387	0.0309073	0.234297	0.95015	0.832502	0.141575	0.691924	0.308076	0.391825	0.334995	0.288136	0.0139581	0.0608175
I	ATA	0.27318	0.968096	0.604187	0.277168	0.419741	0.672981	0.850449	0.489531	0.440678	0.702891	0.0149551	0.368893	0.859422	0.458624	0.0279163	0.530409	0.197408	0.5334	0.474576	0.975075	0.87338	0.858425	0.214357	0.256231	0.522433	0.982054	0.617149	0.413759	0.174477	0.91326	0.293121	0.0398804	0.0997009	0.138584	0.654038	0.0508475	0.664008	0.22333	0.249252	0.48654	0.8335	0.480558	0.244267	0.137587	0.617149	0.823529	0.00398804	0
M	ATG	0.982054	0.851446	0.168495	0.425723	0.780658	0.616152	0.901296	0.0618146	0.470588	0.177468	0.24327	0.378863	0.249252	0.0578265	0	0.226321	0.924227	0.433699	0.00498504	0.0149551	0.0269192	0.271186	0.580259	0.0468594	0.878365	0.197408	0.00299103	0.39681	0.0189432	0.490528	0.525424	0.167498	0.0867398	0.150548	0.836491	0.0558325	0.294118	0.285145	0.0498504	0.502493	0.0458624	0.86341	0.00498504	0.423729	0.392822	0.0787637	0.149551	0.130608
N	AAC	0.51346	0.194417	0.105683	0.338983	0.225324	0.514457	0.597208	0.398804	0.810568	0.22333	0.120638	0.287139	0.627119	0.976072	0.0468594	0.866401	0.34995	0.88335	0.0787637	0.818544	0.639083	0.161515	0.838485	0.402792	0.74676	0.797607	0.00199402	0.0348953	0.608175	0.11665	0.986042	0.1665	0.294118	0.398804	0.868395	0.254237	0.28016	0.249252	0.707876	0.684945	0.301097	0.525424	0.0279163	0.0777667	0.125623	0.50349	0.000997009	0.276171
N	AAT	0.852443	0.870389	0.317049	0.976072	0.698903	0.205384	0.189432	0.370887	0.788634	0.0169492	0.418744	0.706879	0.589232	0.732802	0.558325	0.930209	0.624128	0.225324	0.869392	0.904287	0.475573	0.569292	0.683948	0.953141	0.888335	0.705882	0.692921	0.723829	0.891326	0.319043	0.0129611	0.800598	0.545364	0.413759	0.472582	0.0398804	0.460618	0.235294	0.0189432	0.366899	0.717846	0.169492	0.0279163	0.157527	0.297109	0.288136	0.0149551	0.309073
K	AAA	0.0707876	0.555334	0.673978	0.717846	0.266201	0.0189432	0.738784	0.477567	0.117647	0.0538385	0.517448	0.566301	0.299103	0.353938	0.0857428	0.457627	0.447657	0.888335	0.0518445	0.554337	0.402792	0.272183	0.936191	0.782652	0.715852	0.315055	0.628116	0.978066	0.969093	0.722832	0.594217	0.256231	0.128614	0.226321	0.0488534	0.131605	0.291127	0.00398804	0.814556	0.0957129	0.798604	0.115653	0	0.0169492	0.793619	0.0947159	0.0957129	0.14656
K	AAG	0.697906	0.791625	0.450648	0.99003	0.532403	0.770688	0.897308	0.694915	0.735793	0.394816	0.33998	0.55334	0.492522	0.0388833	0.838485	0.932203	0.692921	0.745763	0.6999	0.295115	0.814556	0.386839	0.747757	0.599202	0.387836	0.811565	0.404786	0.258225	0.0787637	0.922233	0.228315	0.363908	0.181456	0.698903	0.568295	0.999003	0.961117	0.690927	0.154536	0.0917248	0.585244	0.240279	0.33001	0.761715	0.7667	0.0209372	0.65005	0.121635
S	AGC	0.692921	0.967099	0.265204	0.733799	0.364905	0.172483	0.32004	0.688933	0.831505	0.210369	0.14656	0.915254	0.74676	0.134596	0.199402	0.808574	0.73679	0.115653	0.3001	0.297109	0.71984	0.500499	0.467597	0.70987	0.0279163	0.818544	0.692921	0.958126	0.958126	0.895314	0.977069	0.286142	0.33001	0.527418	0.00398804	0.180459	0.529412	0.880359	0.56331	0.738784	0.542373	0.000997009	0.138584	0.137587	0.297109	0.628116	0.0947159	0.348953
S	AGT	1	0.489531	0.643071	0.224327	0.985045	0.429711	0.244267	0.898305	0.842473	0.646062	0.54337	0.473579	0.445663	0.150548	0.441675	0.605184	0.671984	0.537388	0.627119	0.655035	0.728814	0.805583	0.139581	0.621137	0.423729	0.115653	0.0418744	0.395813	0.729811	0.144566	0.794616	0.865404	0.931206	0.744766	0.666999	0.748754	0.176471	0.67996	0.788634	0.13659	0.636092	0.512463	0.0229312	0.854437	0.138584	0.0338983	0.0119641	0.287139
R	AGA	0.965105	0.842473	0.9332	0.888335	0.266201	0.809571	0.123629	0.524427	0.749751	0.672981	0.779661	0.393819	0.953141	0.850449	0.459621	0.96012	0.878365	0.522433	0.129611	0.468594	0.602193	0.628116	0.696909	0.0259222	0.447657	0.11665	0.0538385	0.954138	0.944167	0.696909	0.994018	0.342971	0.750748	0.561316	0.615155	0.546361	0.428714	0.0897308	0.500499	0.926221	0.526421	0.752742	0.140578	0.633101	0.37986	0.81655	0.00199402	0.0169492
R	AGG	0.727817	0.728814	0.148554	0.831505	0.896311	0.783649	0.824526	0.439681	0.529412	0.123629	0.265204	0.199402	0.0548355	0.0538385	0.529412	0.768694	0.3001	0.141575	0.120638	0.0827517	0.66002	0.100698	0.565304	0.646062	0.707876	0.119641	0.197408	0.00199402	0.309073	0.163509	0.4666	0.571286	0.830508	0.108674	0.170489	0.810568	0.627119	0.105683	0.139581	0.604187	0.752742	0.936191	0.294118	0.29013	0.807577	0.336989	0.930209	0.180459
A	GCC	0.399801	0.629113	0.823529	0.997009	0.50349	0.831505	0.988036	0.423729	0.217348	0.66999	0.890329	0.113659	0.793619	0.219342	0.199402	0.9332	0.799601	0.98006	0.171486	0.831505	0.588235	0.448654	0.586241	0.604187	0.0987039	0.421735	0.940179	0.117647	0.991027	0.947159	0.98006	0.132602	0.418744	0.207378	0.94317	0.722832	0.214357	0.0508475	0.0368893	0.393819	0.287139	0.0558325	0.0159521	0.438684	0.72682	0.0418744	0.487537	0.976072
A	GCT	0.681954	0.49651	0.785643	0.924227	0.791625	0.565304	0.85344	0.152542	0.461615	0.0578265	0.74676	0.64008	0.40678	0.66999	0.107677	0.145563	0.817547	0.953141	0.388833	0.210369	0.0478564	0.7667	0.637089	0.448654	0.633101	0.17348	0.380857	0.967099	0.66002	0.935194	0.940179	0.386839	0.590229	0.92323	0.642074	0.915254	0.602193	0.536391	0.472582	0.328016	0.229312	0.546361	0.189432	0.262213	0.10668	0.549352	0.000997009	0.779661
A	GCA	0.414756	0.599202	0.887338	0.791625	0.328016	0.535394	0.961117	0.403789	0.372881	0.956132	0.191426	0.361914	0.232303	0.321037	0.295115	0.391825	0.199402	0.302094	0.295115	0.829511	0.836491	0.304088	0.540379	0.0169492	0.469591	0.404786	0.979063	0.341974	0.287139	0.22333	0.935194	0.200399	0.231306	0.617149	0.418744	0.264207	0.664008	0.0159521	0.0289133	0.0408774	0.0398804	0.631107	0.0937188	0.314058	0.615155	0.56331	0.319043	0.169492
A	GCG	0.82652	0.518445	0.348953	0.659023	0.957129	0.0648056	0.985045	0.864407	0.532403	0.132602	0.325025	0.142572	0.141575	0.143569	0.00498504	0.88335	0.358923	0.202393	0.378863	0.926221	0.817547	0.270189	0.768694	0.779661	0.414756	0.284148	0.998006	0.590229	0.621137	0.968096	1	0.634098	0.926221	0.569292	0.441675	0.781655	0.54337	0.248255	0.0588235	0.754736	0.227318	0.0907278	0.931206	0.397807	0.303091	0.611167	0.989033	0.537388
V	GTC	0.0917248	0.862413	0.661017	0.57328	0.375872	0.554337	0.152542	0.703888	0.939182	0.929212	0.154536	0.134596	0.762712	0.96012	0.12662	0.3001	0.0259222	0.697906	0.787637	0.940179	0.255234	0.974078	0.888335	0.0648056	0.404786	0.7667	0.624128	0.00398804	0.220339	0.462612	0.0109671	0.207378	0.0388833	0.125623	0.972084	0.830508	0.671984	0.0309073	0.566301	0.269192	0.0269192	0.196411	0.405783	0.40678	0.844467	0.859422	0.59322	0.781655
V	GTT	0.228315	0.639083	0.861416	0.254237	0.287139	0.760718	0.840479	0.818544	0.422732	0.102692	0.624128	0.647059	0.402792	0.440678	0.0219342	0.521436	0.727817	0.367896	0.703888	0.289133	0.595214	0.366899	0.365902	0.296112	0.430708	0.0578265	0.0189432	0.86341	0.805583	0.110668	0.909272	0.0648056	0.5334	0.0598205	0.691924	0.0847458	0.802592	0.311067	0.604187	0.751745	0.28016	0.546361	0.418744	0.0348953	0.12662	0.911266	0.158524	0.847458
V	GTA	0.914257	0.345962	0.700897	0.54337	0.178465	0.89332	0.712861	0.297109	0.0488534	0.910269	0.745763	0.361914	0.00299103	0.859422	0.0279163	0.245264	0.0807577	0.267198	0.392822	0.445663	0.103689	0.283151	0.0239282	0.0279163	0.566301	0.0608175	0.00299103	0.148554	0.168495	0.595214	0.313061	0.18345	0.507478	0.132602	0.44666	0.743769	0.0159521	0.237288	0.368893	0.801595	0.00897308	0.440678	0.0408774	0.0578265	0.128614	0.624128	0.00398804	0
V	GTG	0.795613	0.0987039	0.869392	0.617149	0.133599	0.197408	0.993021	0.869392	0.988036	0.435693	0.663011	0.915254	0.0239282	0.22333	0.0638086	0.378863	0.652044	0.805583	0.417747	0	0.658026	0.409771	0.105683	0.400798	0.760718	0.19342	0.135593	0.100698	0.24327	0.724826	0.98006	0.147557	0.477567	0.683948	0.488534	0.889332	0.444666	0.110668	0.15653	0.680957	0.0239282	0.520439	0.0109671	0.232303	0.744766	0.92323	0.103689	0.0857428
D	GAC	0.423729	0.0378863	0.596211	0.391825	0.236291	0.510469	0.798604	0.167498	0.219342	0.368893	0.0667996	0.0338983	0.85344	0.591226	0.103689	0.331007	0.836491	0.876371	0.974078	0.98006	0.619143	0.599202	0.333998	0.381854	0.611167	0.885344	0.511466	0.0967099	0.495513	0.645065	0.0388833	0.316052	0.235294	0.616152	0.00997009	0.224327	0.130608	0.220339	0.874377	0.181456	0.286142	0.00398804	0.0877368	0.159521	0.103689	0.390828	0.731805	0.73679
D	GAT	0.696909	0.411765	0.302094	0.358923	0.0628116	0.437687	0.978066	0.751745	0.704885	0.860419	0.40678	0.469591	0.0199402	0.0618146	0.480558	0.794616	0.824526	0.52343	0.340977	0.88335	0.926221	0.142572	0.772682	0.15653	0.182453	0.0677966	0.00199402	0.370887	0.884347	0.572283	0	0	0.140578	0.769691	0.484546	0.63011	0.488534	0.110668	0.345962	0.723829	0.956132	0.500499	0.354935	0.199402	0.43669	0.44666	0.00398804	0.145563
E	GAA	0.828514	0.520439	0.755733	0.714855	0.444666	0.296112	0.673978	0.220339	0.258225	0.351944	0.997009	0.921236	0.0827517	0.95015	0.151545	0.880359	0.480558	0.305085	0.303091	0.653041	0.67996	0.748754	0.916251	0.321037	0.375872	0.728814	0.0478564	0.278166	0.108674	0.963111	0.760718	0.490528	0.62014	0.585244	0.449651	0.662014	0.22333	0.378863	0.0817547	0.204387	0.591226	0.175474	0.0907278	0.176471	0.216351	0.0538385	0.128614	0.0747757
E	GAG	0.656032	0.95015	0.113659	0.788634	0.861416	0.24327	0.468594	0.823529	0.850449	0.0707876	0.889332	0.939182	0.926221	0.908275	0.0229312	0.974078	0.68993	0.37986	0.968096	0.976072	0.88335	0.179462	0.171486	0.175474	0.793619	0.891326	0.370887	0.299103	0.860419	0.964108	0.998006	0.123629	0.0628116	0.313061	0.220339	0.0418744	0.639083	0.975075	0.838485	0.271186	0.202393	0.258225	0.67996	0.0937188	0.750748	0.997009	0.367896	0.885344
G	GGC	0.443669	0.957129	0.123629	0.117647	0.569292	0.347956	0.618146	0.62014	0.378863	0.582253	0.509472	0.200399	0.570289	0.239282	0.286142	0.616152	0.460618	0.0388833	0.514457	0.526421	0.210369	0.728814	0.787637	0.236291	0.0289133	0.815553	0.892323	0.972084	0.639083	0.40678	0.992024	0.443669	0.00797607	0.588235	0.787637	0.212363	0.160518	0.0697906	0.522433	0.572283	0.0867398	0.66002	0.549352	0.0249252	0.0977069	0.971087	0.231306	0.0279163
G	GGT	0.673978	0.265204	0.105683	0.59322	0.0937188	0.738784	0.999003	0.458624	0.429711	0.239282	0.825523	0.0817547	0.176471	0.158524	0.254237	0.639083	0.601196	0.318046	0.588235	0.421735	0.297109	0.443669	0.739781	0.418744	0.565304	0.884347	0.988036	0.102692	0.692921	0.222333	0.693918	0.742772	0.187438	0.599202	0.995015	0.111665	0.393819	0.437687	0.0229312	0.505484	0.00997009	0.646062	0.40678	0.732802	0.480558	0.328016	0.852443	0.439681
G	GGA	0.858425	0.329013	0.969093	0.204387	0.555334	0.955135	0.714855	0.703888	0.743769	0.392822	0.236291	0.0917248	0.551346	0.987039	0.33001	0.131605	0.731805	0.471585	0.383848	0.95015	0.00398804	0.00598205	0.555334	0.745763	0.378863	0.201396	0.682951	0.73679	0.869392	0.377866	0.562313	0.152542	0.561316	0.864407	0.474576	0.115653	0.828514	0.00797607	0.0388833	0.191426	0.208375	0.291127	0.249252	0.813559	0.671984	0.774676	0.00697906	0.375872
G	GGG	0.438684	0.347956	0.0847458	0.568295	0.742772	0.711864	0.334995	0.375872	0.00598205	0.780658	0.602193	0.531406	0.545364	0.890329	0.0299103	0.0658026	0.168495	0.0428714	0.321037	0.658026	0.505484	0.211366	0.489531	0.326022	0.670987	0.844467	0.335992	1	0.999003	0.767697	0.0309073	0.915254	0.0987039	0.0767697	0.313061	0.551346	0.89332	0.539382	0.119641	0.957129	0.360917	0.0398804	0.0388833	0.478564	0.722832	0.997009	0.125623	0.729811
[truncated: 214 more columns]

## Sheet: Aminoacid heatmap
Stop efficiency at the corresponging amino acid residue in the -2nd position while mRNA codon with specified index number is located in the P-site												Stop efficiency at the corresponging amino acid residue in the E-site while mRNA codon with specified index number is located in the P-site												Stop efficiency at the corresponging amino acid residue in the P-site while mRNA codon with specified index number is located in the P-site												Stop efficiency at the corresponging amino acid residue in the A-site while mRNA codon with specified index number is located in the P-site												Stop efficiency at the corresponging amino acid residue in the 2nd position while mRNA codon with specified index number is located in the P-site
-2	Index number of mRNA codon located in the P-site											E	Index number of mRNA codon located in the P-site											P	Index number of mRNA codon located in the P-site											A	Index number of mRNA codon located in the P-site											2	Index number of mRNA codon located in the P-site
	4	5	6	7	8	9	10	11	12	13			3	4	5	6	7	8	9	10	11	12			2	3	4	5	6	7	8	9	10	11			1	2	3	4	5	6	7	8	9	10			1
W	0.0177954	0.0279248	0.0250057	0.0547888	0.00407004	-0.00359213	-0.00835731	-0.0152525	0.00348901	-0.00810686		W	0.00185676	-0.00132493	0.0115216	0.0239179	0.0629407	0.00576464	-0.00681993	0.00094186	-0.0135188	0.00536321		W	-0.0096139	0.00678324	0.0211436	0.0137916	0.0239917	0.0648508	-0.00190713	-0.00135931	-0.00718469	-0.0157176		W	0.0191035	0.0120168	0.0215207	0.0481431	0.0128243	0.0275615	0.0728525	0.00157529	0.00199693	6.89356e-05		W	0.00372011
Y	0.0284182	0.044648	0.0302512	0.0689122	0.00170188	-0.00424627	-0.00801563	-0.0127953	-0.00188557	-0.00400293		Y	0.0141113	0.0268039	0.0261823	0.0259163	0.0527387	0.000233094	-0.00910624	-0.00841714	-0.0170339	-0.0103674		Y	0.00732266	0.0133273	0.0305603	0.0308985	0.032491	0.0473662	0.000260145	-0.015044	-0.00141541	-0.0282819		Y	0.0206173	0.0118178	0.0129887	0.0262457	0.0226238	0.0357667	0.0571475	-0.0108193	-0.00410012	0.00100722		Y	0.0233197
F	0.0116109	0.0189207	0.0258188	0.0483087	0.00152966	-0.00700278	-0.0143212	-0.0197527	0.00212953	-0.0073877		F	0.00367789	0.013305	0.0158729	0.0224729	0.0608919	-0.00149926	-0.00632172	-0.00887397	-0.00805695	0.00221021		F	0.00355495	0.0142836	0.0205267	0.026266	0.0266656	0.0723696	0.000132452	-0.00605086	-0.021525	-0.0174031		F	0.0236446	0.00656122	-0.000630771	0.0219449	0.0261572	0.0215136	0.0725676	0.00479008	-0.00493165	-0.000483055		F	0.0264403
I	0.0345101	0.0338692	0.0357352	0.0642791	-0.00356907	-0.00739566	-0.00268183	-0.0281138	-0.00627824	-0.00947549		I	0.0119078	0.0304404	0.0260806	0.0404247	0.0768425	0.000853966	-0.00511036	-0.0069558	-0.0158335	-0.00149775		I	0.00140652	0.0139161	0.0290841	0.0306225	0.0321569	0.0679397	0.00279094	0.000779193	-0.00527711	-0.00497498		I	0.0202842	0.0225147	0.0170928	0.0264277	0.0276716	0.0268037	0.0678537	0.00140133	-0.0011533	-0.012345		I	0.0173682
L	0.0194467	0.0144851	0.019405	0.0568863	-0.00182004	-0.00896513	-0.0124027	-0.017151	-0.00424616	-0.0103803		L	0.00586743	0.0152479	0.0196163	0.0201154	0.0594725	-0.00390272	-0.0122135	-0.0106916	-0.0192236	-0.00450759		L	0.00270424	0.00971642	0.0187092	0.0194859	0.026568	0.0577957	-0.00238476	-0.0063968	-0.0108266	-0.0250594		L	0.0156581	0.00468508	0.00635506	0.0129753	0.0138373	0.018852	0.0590913	-0.00480158	-0.0098187	-0.0128832		L	0.0268459
V	0.0203731	0.0264662	0.0256092	0.0629754	-0.00101437	-0.00830668	-0.011281	-0.0149631	-0.00840218	-0.00560517		V	-0.000103488	0.0218912	0.0247637	0.0306444	0.067777	0.00416838	0.00132311	-0.00243008	-0.0127544	-0.00420862		V	0.00395031	0.0108764	0.0154047	0.0280246	0.0264169	0.0621977	0.00425613	-0.0022796	-0.00835163	-0.00989334		V	0.0196859	0.00156006	0.00392405	0.0152738	0.0178044	0.0247522	0.0694581	0.00430529	0.00106063	-0.00452972		V	0.0159767
M	0.0351998	0.0353301	0.0370524	0.0583795	0.000143832	0.00321929	-0.0130382	0.00372102	0.0112226	-0.0153553		M	0.0060854	0.0186332	0.036411	0.0292135	0.0507991	-0.00216185	-0.00377599	-0.00936245	-0.00709287	-0.00200052		M	0.0196953	0.00480584	0.027245	0.0378008	0.0387832	0.071575	0.0127153	0.0010455	-0.00297177	-0.015454		M	0.0175513	-0.00191795	0.00614003	0.0250896	0.0211832	0.030346	0.0638137	0.0019772	-0.00107089	-0.0112964		M	0.0145929
A	0.011189	0.0164679	0.0172576	0.0566372	-0.00155904	-0.00872672	-0.0106398	-0.0170396	-0.00205535	-0.00721637		A	0.00426568	0.0133575	0.0105954	0.0202167	0.0609789	-0.00571978	-0.0104477	-0.0133885	-0.0201052	-0.00131022		A	0.00184197	0.00669348	0.0141057	0.017117	0.0132841	0.0552719	-0.000805	-0.00643376	-0.00874163	-0.0113175		A	0.018127	0.00257272	0.00338847	0.0150043	0.0156852	0.0192255	0.0604306	-0.00066871	-0.00768189	-0.00913653		A	0.0124562
T	0.0221801	0.0258926	0.0307377	0.0547472	-0.00333753	-0.00762408	-0.0143232	-0.0188742	-5.47817e-05	-0.00641984		T	0.0158636	0.0222642	0.0304463	0.0274625	0.0560698	-0.000222024	-0.00609658	-0.00650118	-0.0164545	-0.0031201		T	0.00640248	0.0161743	0.0228445	0.0166993	0.0179686	0.0576226	-0.00392682	-0.00527457	-0.0114834	-0.0152449		T	0.0206065	0.0127553	0.00992936	0.0202218	0.0189495	0.0186025	0.059089	-0.00731772	-0.0117955	-0.00827004		T	0.0259814
S	0.0132602	0.0110973	0.0183017	0.0605565	-0.00264911	-0.00823415	-0.00985949	-0.0197454	-0.00132278	-0.00680091		S	0.00432859	0.0182703	0.0126782	0.0191717	0.0543605	-0.00451802	-0.00947141	-0.0130076	-0.0145387	-0.00382455		S	0.0058922	0.00613975	0.0152962	0.0102782	0.0183244	0.0573039	-0.00136275	-0.011197	-0.0122365	-0.0219684		S	0.0128769	0.00230747	0.00881986	0.0166586	0.015008	0.018689	0.0583505	-0.00292133	-0.00749533	-0.0112767		S	0.0199781
G	0.0135182	0.0181322	0.0218905	0.057049	-0.000893925	-0.00692902	-0.00940464	-0.0148945	0.00182417	-0.00308486		G	0.00380118	0.0082885	0.0120789	0.01532	0.059348	-0.00466249	-0.012128	-0.0113303	-0.0110943	0.00645528		G	-0.00151544	0.00615637	0.0103348	0.0216072	0.0249383	0.0667238	0.0021195	-0.00659116	-0.00487559	-0.00910592		G	0.00678614	-0.00600042	-0.00168189	0.0158856	0.018112	0.0186999	0.0592918	0.00298632	-0.00539003	-0.00995063		G	0.00939508
P	0.00943838	0.00513726	0.0122135	0.0502315	-0.00234676	-0.00952572	-0.0128524	-0.0174353	-0.004868	-0.00692515		P	0.00725589	0.0121013	0.00976198	0.00815249	0.0490222	-0.00977295	-0.021474	-0.0209367	-0.0227454	-0.00536415		P	0.00274212	0.00443149	0.0216892	0.0111267	0.0143324	0.044519	-0.0162335	-0.0249411	-0.0236844	-0.0291613		P	0.0229822	-0.000196645	0.00418617	0.00841875	0.0127828	0.0154732	0.0468471	-0.0116686	-0.0201984	-0.0209314		P	0.0064426
Q	0.0209007	0.0303152	0.0321726	0.0641861	0.000749833	-0.00899966	-0.0108222	-0.0146872	0.00763906	-0.0119797		Q	0.0132176	0.0163824	0.0227747	0.0191736	0.0568064	-0.00579524	-0.00556271	-0.0019065	-0.0100342	-0.00343829		Q	0.0100215	0.0194327	0.0222143	0.0248104	0.0187178	0.0579314	-0.00192133	-0.0122044	-0.00684374	-0.0141249		Q	0.0273794	0.00620399	0.00681385	0.0204908	0.0211005	0.0250057	0.0641593	-0.00193394	-0.00408593	-0.0114342		Q	0.0301324
N	0.0293177	0.0328696	0.0252749	0.0534242	-0.00830848	-0.0108648	-0.00338679	-0.0225386	-0.00607018	-0.00964266		N	0.0134365	0.0284536	0.0287457	0.0277353	0.0529154	0.000124266	-0.00508463	-0.00705147	-0.0115945	-0.00064257		N	-0.00111895	0.0106195	0.0256078	0.0257231	0.0233813	0.0681318	0.00319221	-0.000796881	-0.011725	-0.0132232		N	0.0256706	0.0114106	0.029664	0.0382398	0.0333589	0.0298771	0.0645687	-0.00377021	-0.00668556	-0.0244341		N	0.0300914
H	0.0214864	0.0197648	0.0137425	0.0598794	-0.0106543	-0.0124303	-0.0182288	-0.0264995	-0.00536506	-0.00441457		H	0.0151407	0.0206181	0.0292723	0.0205385	0.0589319	-0.00333572	-0.00711014	-0.0138975	-0.0270068	-0.00174263		H	0.0216684	0.0181426	0.0235455	0.0247954	0.0239786	0.0506522	-0.00374923	-0.00875743	-0.00948397	-0.0230433		H	0.0273383	0.0120401	0.0078754	0.021168	0.0267292	0.0297966	0.0632437	0.00101716	-0.00792252	-0.00849398		H	0.0289066
C	0.0201641	0.0132605	0.0287461	0.0554533	-0.00330027	-0.00737692	-0.00752624	-0.0174613	-0.0022648	-0.00421956		C	0.00278609	0.0191455	0.0128697	0.0236074	0.0589265	0.00138789	-0.00778585	-0.0111063	-0.00961987	-0.00189951		C	0.000629798	0.00758309	0.0269849	0.0172824	0.0310009	0.0687901	-0.00617108	-0.00361686	-0.0106106	-0.0169691		C	0.0184426	0.00183586	0.00428893	0.0121637	0.00387185	0.0163432	0.0578516	-0.00491628	-0.0160563	-0.0107325		C	0.0194149
K	0.0358851	0.026274	0.0200936	0.0511654	0.000401002	-0.0126281	-0.0151476	-0.0187035	0.00398752	-0.0121019		K	0.0330144	0.0586126	0.0337061	0.0285733	0.0562244	-0.00409628	0.00015718	-0.00445507	-0.0169293	-0.000340534		K	0.00175534	0.0249696	0.0189677	0.0235889	0.0256884	0.0599775	0.00135522	-0.00736429	-0.00911019	-0.0164583		K	0.0270363	0.0214987	0.0541985	0.0450418	0.0420431	0.0384088	0.0623139	0.0104166	-0.00697409	-0.0267171		K	0.0264569
R	0.0190868	0.0109221	0.0117213	0.0541182	-0.00966736	-0.013287	-0.012227	-0.0191141	-0.00614235	-0.0057414		R	0.025851	0.0200977	0.0202481	0.019688	0.059157	0.000975977	-0.00457619	-0.00894521	-0.0256027	-0.0061931		R	0.00924429	0.0130312	0.016448	0.0175372	0.0222369	0.0623475	-0.00434417	-0.00611658	-0.0116495	-0.0219019		R	0.0195874	0.0115979	0.0281141	0.0170598	0.022965	0.0205442	0.0535025	-0.00242824	-0.009682	-0.0106962		R	0.0298497
E	0.0177215	0.0215827	0.0176218	0.0557169	-0.00290064	-0.0117312	-0.0108184	-0.0184419	0.00215952	-0.01373		E	0.00986025	0.0288607	0.0253087	0.0324099	0.0438844	-0.00544569	-0.00739846	-0.00742625	-0.0183293	0.00120273		E	-0.00967667	0.00563145	0.00765458	0.0202158	0.00530564	0.0667245	-0.00342859	-0.00894648	-0.00402107	-0.00760316		E	0.00955041	-0.00500048	0.00523882	0.0286651	0.0304411	0.0348942	0.0656273	-0.00492169	-0.010002	-0.017083		E	0.0221314
D	0.0170704	0.0256849	0.0271661	0.041037	-0.000243344	-0.0117733	-0.00706901	-0.00822087	0.00240448	-0.00198006		D	0.00107583	0.0174195	0.0265101	0.0251079	0.0482849	0.00208583	-0.00631375	-0.0125635	-0.011441	-0.00138658		D	0.00739225	0.00942573	0.021999	0.019255	0.0278565	0.05952	0.00290427	-0.0057524	-0.00664525	-0.00700342		D	0.00633069	-0.00171383	0.00164511	0.0230511	0.0182127	0.0256862	0.0560769	-0.00415894	-0.00598434	-0.0145044		D	0.00938278
*	0	0	0	0	0	0	0	0	0	0		*	0	0	0	0	0	0	0	0	0	0		*	0	0	0	0	0	0	0	0	0	0		*	-0.0293724	-0.0247565	0.00374228	0.0430163	0.0336764	0.0182583	0.0566489	-0.00914147	-0.0260958	-0.0195426		*	-0.0114659
[truncated: 8 more columns]

## Sheet: P-value for aminoacid heatmap
P-value for shuffled datasets exceeding experimental data of stop efficiency at the corresponging amino acid residue in the -2nd position while mRNA codon with specified index number is located in the P-site												P-value for shuffled datasets exceeding experimental data of stop efficiency at the corresponging amino acid residue in the E-site while mRNA codon with specified index number is located in the P-site												P-value for shuffled datasets exceeding experimental data of stop efficiency at the corresponging amino acid residue in the P-site while mRNA codon with specified index number is located in the P-site												P-value for shuffled datasets exceeding experimental data of stop efficiency at the corresponging amino acid residue in the A-site while mRNA codon with specified index number is located in the P-site												P-value for shuffled datasets exceeding experimental data of stop efficiency at the corresponging amino acid residue in the 2nd position while mRNA codon with specified index number is located in the P-site
-2	Index number of mRNA codon located in the P-site											E	Index number of mRNA codon located in the P-site											P	Index number of mRNA codon located in the P-site											A	Index number of mRNA codon located in the P-site											2	Index number of mRNA codon located in the P-site
	4	5	6	7	8	9	10	11	12	13			3	4	5	6	7	8	9	10	11	12			2	3	4	5	6	7	8	9	10	11			1	2	3	4	5	6	7	8	9	10			1
W	0.0438684	0.0169492	0.207378	0.424726	0.0249252	0.0458624	0.274177	0.315055	0.0887338	0.691924		W	0.961117	1	0.884347	0.234297	0.0927218	0.00897308	0.238285	0.000997009	0.198405	0.0418744		W	0.992024	0.739781	0.3001	0.764706	0.241276	0.131605	0.382851	0.0169492	0.141575	0.321037		W	0.316052	0.0757727	0.00897308	0	0.838485	0.155533	0.0438684	0.127617	0.000997009	0.00199402		W	0.984048
Y	0.0478564	0	0.0179462	0.0269192	0.147557	0.13659	0.240279	0.185444	0.458624	0.208375		Y	0.208375	0.00398804	0.0428714	0.167498	0.58325	0.234297	0.515454	0.262213	0.469591	0.975075		Y	0.279163	0.109671	0.00697906	0.0139581	0.0319043	0.857428	0.199402	0.939182	0.00997009	0.988036		Y	0.272183	0.0458624	0.278166	0.113659	0.29013	0.0139581	0.541376	0.967099	0.0797607	0.00299103		Y	0.0667996
F	0	0.230309	0.0847458	0.861416	0.100698	0.305085	0.741775	0.688933	0.100698	0.613161		F	0	0.73679	0.616152	0.312064	0.147557	0.33001	0.228315	0.259222	0.0159521	0.104686		F	0.240279	0.104686	0.303091	0.0388833	0.131605	0.00598205	0.229312	0.158524	0.995015	0.439681		F	0.0488534	0.295115	0.994018	0.227318	0.0707876	0.419741	0.0289133	0.0279163	0.0817547	0.000997009		F	0.0538385
I	0	0	0	0.0139581	0.578265	0.328016	0.00199402	0.992024	0.846461	0.844467		I	0.262213	0.00199402	0.0368893	0	0	0.121635	0.0787637	0.13659	0.346959	0.432702		I	0.761715	0.157527	0.00598205	0.00398804	0.00797607	0.0358923	0.0319043	0.00199402	0.0638086	0.000997009		I	0.189432	0	0.0598205	0.0448654	0.0329013	0.158524	0.0498504	0.112662	0.00299103	0.606181		I	0.467597
L	0.000997009	0.844467	0.550349	0.235294	0.256231	0.519442	0.749751	0.448654	0.845464	0.995015		L	0.738784	0.789631	0.24327	0.516451	0.119641	0.673978	0.956132	0.390828	0.763709	0.864407		L	0.592223	0.458624	0.381854	0.328016	0.0199402	0.412762	0.363908	0.0279163	0.334995	1		L	0.678963	0.367896	0.932203	0.976072	0.969093	0.778664	0.395813	0.830508	0.564307	0.745763		L	0
V	0.287139	0	0.0189432	0.00398804	0.182453	0.375872	0.522433	0.162512	0.993021	0.264207		V	1	0.0787637	0.0109671	0	0.00299103	0	0	0	0.0289133	0.787637		V	0.514457	0.32004	0.807577	0.000997009	0.0608175	0.132602	0	0	0.0857428	0		V	0.202393	0.761715	0.981057	0.8335	0.653041	0.164506	0.00199402	0	0	0		V	0.591226
M	0.0129611	0.00697906	0.00398804	0.304088	0.29013	0.000997009	0.674975	0.00199402	0.0129611	0.948156		M	0.735793	0.454636	0.00199402	0.114656	0.693918	0.459621	0.124626	0.373878	0.0618146	0.442672		M	0.0189432	0.771685	0.0717846	0.00299103	0.0119641	0.0777667	0	0.0438684	0.0927218	0.33998		M	0.469591	0.787637	0.742772	0.196411	0.386839	0.161515	0.268195	0.208375	0.0707876	0.480558		M	0.601196
A	0.998006	0.765703	0.891326	0.298106	0.160518	0.409771	0.414756	0.42672	0.377866	0.682951		A	0.995015	0.976072	1	0.485543	0.0329013	0.952144	0.778664	0.915254	0.92323	0.249252		A	0.811565	0.941176	0.962114	0.71984	1	0.78664	0.0667996	0.0159521	0.0458624	0		A	0.293121	0.701894	0.997009	0.932203	0.915254	0.760718	0.207378	0.0378863	0.0707876	0.0687936		A	0.963111
T	0.114656	0.00598205	0.000997009	0.420738	0.555334	0.236291	0.977069	0.706879	0.140578	0.493519		T	0.0179462	0.0707876	0	0.00997009	0.520439	0.0548355	0.0358923	0.0169492	0.303091	0.599202		T	0.211366	0.0179462	0.0667996	0.671984	0.850449	0.440678	0.700897	0.0169492	0.508475	0.167498		T	0.150548	0.00299103	0.509472	0.294118	0.475573	0.797607	0.35992	0.967099	0.894317	0.0937188		T	0.00598205
S	0.987039	0.993021	0.735793	0.0149551	0.410768	0.294118	0.214357	0.897308	0.257228	0.568295		S	1	0.381854	0.989033	0.642074	0.675972	0.819541	0.566301	0.854437	0.0528415	0.772682		S	0.209372	0.932203	0.887338	1	0.810568	0.50349	0.128614	0.881356	0.682951	0.977069		S	0.939182	0.757727	0.693918	0.7667	0.940179	0.81655	0.462612	0.450648	0.0827517	0.412762		S	0.147557
G	0.989033	0.410768	0.202393	0.138584	0.0867398	0.0508475	0.134596	0.0917248	0.00398804	0.00199402		G	0.999003	1	0.994018	0.985045	0.154536	0.837488	0.974078	0.501496	0	0		G	0.991027	0.955135	1	0.0827517	0.0398804	0.00199402	0.00199402	0.0319043	0	0		G	1	1	1	0.864407	0.632104	0.80658	0.361914	0	0.00299103	0.192423		G	0.996012
P	1	1	1	0.992024	0.33998	0.65005	0.885344	0.551346	0.969093	0.633101		P	0.946162	0.999003	1	1	1	1	1	1	1	0.974078		P	0.723829	0.999003	0.0498504	1	0.999003	1	1	1	1	1		P	0.000997009	0.977069	1	1	1	0.999003	1	1	1	1		P	1
Q	0.33001	0	0.00299103	0.0329013	0.0987039	0.458624	0.464606	0.218345	0.00299103	0.97009		Q	0.218345	0.608175	0.109671	0.570289	0.524427	0.844467	0.0987039	0.00199402	0.0289133	0.610169		Q	0.132602	0.000997009	0.176471	0.0777667	0.655035	0.474576	0.340977	0.850449	0.102692	0.140578		Q	0.0299103	0.289133	0.804586	0.333001	0.294118	0.175474	0.164506	0.355932	0.0608175	0.460618		Q	0.000997009
N	0.0209372	0.000997009	0.0897308	0.574277	0.921236	0.731805	0.0189432	0.807577	0.799601	0.798604		N	0.221336	0.00299103	0.00797607	0.0867398	0.670987	0.195414	0.10668	0.184447	0.125623	0.350947		N	0.811565	0.400798	0.0458624	0.0707876	0.306082	0.0418744	0.0388833	0.0189432	0.532403	0.207378		N	0.0658026	0.0717846	0	0	0.00498504	0.0588235	0.176471	0.572283	0.239282	0.994018		N	0.00398804
H	0.239282	0.279163	0.952144	0.129611	0.999003	0.938185	0.996012	0.999003	0.850449	0.169492		H	0.0847458	0.185444	0.00199402	0.448654	0.252243	0.546361	0.160518	0.824526	0.999003	0.390828		H	0	0.00398804	0.0827517	0.0498504	0.214357	0.876371	0.587238	0.404786	0.278166	0.96012		H	0.0109671	0.0189432	0.744766	0.21336	0.0299103	0.0179462	0.152542	0.0528415	0.288136	0.142572		H	0
C	0	0.815553	0.0179462	0.432702	0.529412	0.272183	0.144566	0.508475	0.454636	0.142572		C	0.947159	0.364905	0.888335	0.189432	0.201396	0.0737787	0.313061	0.462612	0.0159521	0.419741		C	0.784646	0.680957	0.0179462	0.600199	0.0129611	0.0319043	0.834497	0.0169492	0.407777	0.389831		C	0.355932	0.688933	0.928215	0.927218	1	0.821535	0.557328	0.701894	0.986042	0.383848		C	0.313061
K	0	0.0189432	0.423729	0.673978	0.165503	0.842473	0.874377	0.615155	0.108674	0.875374		K	0	0	0.000997009	0.0817547	0.581256	0.622134	0	0.0927218	0.462612	0.333998		K	0.683948	0	0.408774	0.174477	0.185444	0.338983	0.130608	0.321037	0.31007	0.39681		K	0.0169492	0	0	0	0	0.000997009	0.31007	0.00897308	0.31007	0.993021		K	0.0319043
R	0.367896	1	1	0.606181	1	1	0.758724	0.852443	0.995015	0.19342		R	0	0.139581	0.125623	0.574277	0.119641	0.000997009	0	0.0628116	1	0.992024		R	0.00398804	0.0438684	0.798604	0.683948	0.230309	0.0149551	0.817547	0.00498504	0.527418	0.988036		R	0.109671	0	0	0.714855	0.0189432	0.610169	0.963111	0.284148	0.536391	0.241276		R	0
E	0.575274	0.122632	0.637089	0.450648	0.482552	0.817547	0.461615	0.619143	0.141575	0.988036		E	0.504487	0.00498504	0.0478564	0.00398804	0.962114	0.754736	0.267198	0.160518	0.575274	0.172483		E	0.989033	0.852443	0.98006	0.315055	0.997009	0.0797607	0.532403	0.450648	0.0398804	0.0149551		E	0.910269	0.979063	0.855434	0.0219342	0.0179462	0.00299103	0.144566	0.663011	0.551346	0.91326		E	0.121635
D	0.598205	0.0169492	0.0448654	0.998006	0.19342	0.862413	0.111665	0.0109671	0.0727817	0.0269192		D	0.976072	0.435693	0.0249252	0.165503	0.921236	0.0588235	0.150548	0.616152	0.0558325	0.371884		D	0.271186	0.54337	0.197408	0.44666	0.0658026	0.287139	0.0229312	0.118644	0.0867398	0		D	0.989033	0.915254	0.983051	0.153539	0.517448	0.169492	0.644068	0.619143	0.120638	0.809571		D	0.951147
*	1	1	1	1	0.185444	0.00199402	0.00299103	0	0.29013	0.0169492		*	0.996012	1	1	1	1	0.210369	0.000997009	0.00598205	0	0.282154		*	0.797607	0.993021	1	1	1	1	0.215354	0.00598205	0.00797607	0		*	1	1	0.900299	0	0.00199402	0.6999	0.610169	0.934197	1	0.967099		*	1
[truncated: 8 more columns]

## Sheet: Heatmap for aminoacids in sites
Stop efficiency at the corresponging amino acid residue while located in the ribosome sites							P-values for shuffled datasets exceeding experimental data of stop efficiency at the corresponging triplet while located in the ribosome sites
	Ribosome sites							Ribosome sites
	-2	E	P	A	2			-2	E	P	A	2
W	0.0114489	0.0100797	0.00997859	0.0216179	0.0137465		W	0	0.311067	0.383848	0	0.774676
Y	0.0183589	0.0122893	0.0119752	0.0165075	0.0169034		Y	0	0.0189432	0.0129611	0.00199402	0.0897308
F	0.0084421	0.010617	0.0116508	0.0158189	0.0177897		F	0.0229312	0.0149551	0.00299103	0.000997009	0.0119641
I	0.0164821	0.0178794	0.016468	0.0217647	0.0205132		I	0	0	0	0	0
L	0.006114	0.00730836	0.00898219	0.00967434	0.0183501		L	0.461615	0.725823	0.298106	0.99003	0
V	0.0104832	0.0129979	0.0124827	0.0140431	0.0144239		V	0	0	0	0.00498504	0.544367
M	0.0185177	0.0145125	0.0214567	0.0161737	0.0211725		M	0	0.0259222	0	0.176471	0.00697906
A	0.0051141	0.00540896	0.00768181	0.0116308	0.0118943		A	0.899302	1	0.814556	0.789631	1
T	0.0075894	0.0125815	0.0107854	0.0159797	0.0186906		T	0.00598205	0	0.0677966	0.170489	0.00199402
S	0.00579503	0.00655656	0.00680705	0.0114605	0.0158076		S	0.827517	0.984048	0.999003	0.951147	0.125623
G	0.00898139	0.00694803	0.011194	0.00938492	0.0118708		G	0.0119641	0.989033	0	1	0.999003
P	0.00195182	0.000659559	0.00056566	0.00569522	0.0112798		P	1	1	1	1	1
Q	0.0119804	0.0109834	0.0139703	0.0155649	0.022106		Q	0	0.0538385	0.00498504	0.0169492	0
N	0.0127415	0.0162588	0.0150175	0.0238105	0.0220708		N	0.00997009	0	0.00199402	0	0
H	0.00409205	0.00948303	0.0120934	0.0173088	0.0208815		H	0.996012	0.0677966	0.00498504	0	0
C	0.00868591	0.00926806	0.0110935	0.00803283	0.0129855		C	0.000997009	0.159521	0.0159521	0.997009	0.835494
K	0.0130919	0.0265683	0.0156956	0.0324153	0.0232655		K	0.0149551	0	0.00897308	0	0
R	0.00344526	0.0108243	0.0104397	0.0153551	0.0172598		R	1	0	0.0309073	0	0.00299103
E	0.00822966	0.0125205	0.00877704	0.0141074	0.0180136		E	0.527418	0.0109671	0.889332	0.19342	0.0319043
D	0.0095769	0.00959694	0.013421	0.0108415	0.0118378		D	0.0269192	0.177468	0.000997009	0.934197	0.948156
*	0	0	0	0.00352018	-0.00170257		*	1	1	1	1	1

## Sheet: 2D aminoacid heatmap
2-dimensional representation of stalling propensities with the corresponding aminio acid residue located in the P- and A-sites																							2-dimensional representation of stalling propensities with the corresponding aminio acid residue located in the E- and A-sites																							2-dimensional representation of stalling propensities with the corresponding aminio acid residue located in the E- and P-sites
P\A	Amino acid residues located in the A-site																						E\A	Amino acid residues located in the A-site																						E\P	Amino acid residues located in the P-site
	W	Y	F	I	L	V	M	A	T	S	G	P	Q	N	H	C	K	R	E	D	*			W	Y	F	I	L	V	M	A	T	S	G	P	Q	N	H	C	K	R	E	D	*			W	Y	F
W	0.0135808	0.0297129	0.0170358	-0.00830659	0.00887512	0.0119132	-0.0103791	0.0118217	0.0210813	0.0251169	0.00665088	-0.000756757	0.010898	0.0169916	0.00141796	-0.00330116	0.0185895	0.0226821	0.0387803	0.0226693	0.00459879		W	0.00693312	0.025222	0.0217776	0.0150029	0.00698462	0.0122139	0.0129837	0.0137161	0.0175661	0.0194044	0.0147047	0.0177525	0.0221975	0.0476769	0.0054528	-0.0220321	0.0385925	0.00983491	0.0139773	-0.00108061	-0.00329138		W	0.0187157	0.0135771	0.0203681
Y	0.0419345	0.0238328	0.0276741	0.0256304	0.00384906	0.0232229	0.000513657	0.0188418	0.00684222	0.0130657	0.0117833	0.0128399	0.0140782	0.0356688	0.00755451	0.00496076	0.0457439	0.0122504	0.0360386	0.0145177	0.039225		Y	0.00996748	0.0173519	0.00328703	0.0421268	0.0178286	0.00705218	0.00313798	0.0118968	0.00929399	0.0163077	0.0183116	0.0104447	0.0258944	0.0323872	0.0172695	0.00427704	0.0441404	0.0212665	0.034476	0.0186466	0.0857026		Y	0.0260346	0.0252237	0.023976
F	0.0319367	0.025033	0.0254708	0.0106979	0.00465515	0.0164333	0.0205227	0.0119277	0.0150602	0.0149994	0.0224535	0.0142026	0.0104554	0.0298833	0.0276841	0.000526336	0.000543638	0.0134872	0.00581347	0.0211513	0.0165498		F	0.0375401	0.00975706	-0.00555042	0.0283255	0.0103954	0.00467474	0.00201872	0.0198158	0.00908877	0.00340232	0.0162981	0.00661129	-0.00117235	0.0252542	0.0240626	0.0119454	0.0194955	0.0233059	0.0223599	0.0206743	0.0331219		F	0.0118216	0.0255353	0.0135286
I	0.0435535	0.0161392	0.00954505	0.0280611	0.00547873	0.0121794	0.0109565	0.0118828	0.0218689	0.0100262	0.0129115	0.0164619	0.0312162	0.0147669	0.0144811	0.0295265	0.0248495	0.0301456	0.0149077	0.0182037	0.0327401		I	0.0359864	0.0289236	0.0110728	0.034079	0.0248529	0.0318695	0.0106298	0.0256208	0.032055	0.00937629	0.0178716	0.0176698	0.0335673	0.0427121	0.0114958	0.0051217	0.0261096	0.0226628	0.0337727	0.0176949	0.0400242		I	0.0344045	0.0191668	0.0235628
L	0.0215833	0.0117044	0.00772882	0.0229015	0.00748137	0.0192619	-0.000153766	0.0137508	0.0168028	0.00856333	0.00895417	0.0128195	0.0233455	0.0138614	0.0209496	0.005701	0.0434573	0.0127806	0.00670957	0.0116401	0.020151		L	0.0222781	0.0125728	0.0123325	0.0256662	0.00642712	0.0156246	0.018779	0.0113889	0.013265	0.0107436	0.00917277	0.00842521	0.0204432	0.0159985	0.0102847	0.0205526	0.0334015	0.0123382	0.00942155	0.012685	0.0153066		L	0.0137087	0.00302852	0.00957042
V	0.0266775	0.0177495	0.0107936	0.0225894	0.013472	0.0158808	0.00578483	0.0162131	0.0144196	0.0119616	0.0121788	0.0104264	0.0120913	0.0388818	0.00582912	0.0152494	0.0395885	0.0194974	0.0090311	0.0075254	0.0323308		V	0.0346144	0.0193506	0.0246965	0.0265039	0.0208454	0.0210136	0.0148783	0.0166306	0.020517	0.00861659	0.0172353	0.0129446	0.0109016	0.0495988	0.0177494	0.0229994	0.0308344	0.0216965	0.026548	0.0202188	0.0197337		V	0.0268001	0.0202032	0.0197401
M	0.0346097	0.00577722	0.039849	0.0399936	0.0106483	0.0234515	0.011816	0.0302292	0.0301181	0.0308024	0.0192451	0.00527935	0.0242392	0.0183636	0.0244702	0.0426125	0.0508226	0.0358591	-0.0117494	0.0243232	0.0474201		M	0.0138938	0.0195076	0.013687	0.0164335	-0.000559049	0.022301	-0.0188499	0.0206142	0.023895	0.0134006	0.0215194	0.0178433	0.032859	0.0269244	0.01151	0.0186143	0.0597314	0.0248966	0.0245828	0.0206935	-0.0238753		M	0.0191847	0.033398	0.0229541
A	0.016896	0.0171869	0.0110431	0.0238564	0.00527019	0.0125641	0.0201245	0.00934674	0.00956986	0.00964647	0.00729524	0.0057264	0.0153853	0.0275893	0.0140135	-4.43489e-05	0.02763	0.0124334	0.0076854	0.00673669	-0.0133762		A	0.0128518	0.0131932	0.0156718	0.0216129	0.0114439	0.00973348	0.0119676	0.00807946	0.0170358	0.0144445	0.012303	-0.00149528	0.0196465	0.0267182	0.0198652	0.00276682	0.00851128	0.00921481	0.0147464	0.00455941	0.0152926		A	0.0165422	-0.00237115	0.0130431
T	0.0188238	0.0162415	0.00895801	0.0190366	0.0115096	0.0154209	-0.00285577	0.010488	0.00966695	0.00640765	0.0124188	0.00579285	0.0171906	0.0246883	0.023689	0.00541658	0.0189715	0.0167327	0.0135015	0.0225778	0.0301718		T	0.0301098	0.0239067	0.0151465	0.0206252	0.00856214	0.0169569	0.0259031	0.0200939	0.0201764	0.016755	0.0131585	0.0128535	0.0178963	0.0464066	0.0196213	0.013015	0.0354311	0.017535	0.0107362	0.0263284	0.0287963		T	0.0093432	0.027728	0.0133156
S	0.0187125	0.0238579	0.0058824	0.0159669	0.00653382	0.0102474	0.0210058	0.00494735	0.0204975	0.00584887	0.0115206	0.00614557	0.0123649	0.0220456	0.00651635	0.0113449	0.0301531	0.0116272	0.0131724	0.000395433	-0.00650117		S	0.0196999	0.0224607	0.0152186	0.0155318	0.00806614	0.0125041	0.0224047	0.0108947	0.0187032	0.0138184	0.0162229	0.00078829	0.0168283	0.019176	0.0125181	-0.005652	0.0153241	0.00696215	0.0113032	0.0078531	0.0144175		S	0.00462964	0.0217367	0.00726765
G	0.0082202	0.0122394	0.0199332	0.0258314	0.00878522	0.00711847	0.00675783	0.0138468	0.0217198	0.0119833	0.0116775	0.0130812	0.017189	0.0281079	0.0162159	0.00250058	0.0262863	0.0151113	0.0200003	0.0173427	-0.00561264		G	0.0305631	0.00800379	0.00844509	0.0132453	0.00594596	0.0107874	0.0192993	0.0119691	0.0151444	0.0168722	0.0113177	-0.00583437	0.00271374	0.0217662	0.0153429	-0.000261674	0.0137673	0.010361	0.00990735	0.00500786	0.0240751		G	0.00931236	0.0101842	0.00738459
P	0.0336267	0.0160686	0.0230743	0.0289335	0.00993156	0.0121029	0.0274516	0.00658632	0.00613002	0.0118313	0.00541845	-0.0290835	0.0102545	0.0277851	0.0191074	-0.000675132	0.0323313	0.00508415	0.012483	0.00224568	-0.029594		P	-0.00283357	-0.000301886	0.0184042	0.020187	0.00289034	0.00971613	0.021404	0.00554171	0.00850902	0.00606581	0.00202745	-0.0032822	0.0130423	0.0088539	0.0107445	0.00473111	0.033466	0.00436082	0.00507342	0.00725229	-0.0381762		P	0.00792992	0.0064086	0.0110961
Q	0.0225468	0.024119	0.0156196	0.0239898	0.0102226	0.0164461	0.0406691	0.0017491	0.0201222	0.0126521	0.00987327	0.0140183	0.0042573	0.0290442	0.0235639	0.0240463	0.0429457	0.028364	0.016727	0.00587055	0.0259694		Q	0.0293125	0.0190495	0.0138684	0.00842071	0.01839	0.0255944	0.00645756	0.0128909	0.00511774	0.00447022	0.00865114	0.0141828	0.0221973	0.0306779	0.0239174	0.0227024	0.0311678	0.012059	0.0250519	0.00942692	0.0230434		Q	0.0069162	0.0021408	0.0171564
N	0.0148646	-0.0072007	0.0108081	0.0295351	0.0112674	0.0312534	0.00824351	0.00829459	0.0216645	0.0133056	0.017083	0.0109865	0.0218282	0.0170198	0.0165357	0.0113632	0.0481811	0.0166203	0.0063166	0.0215106	0.0277207		N	0.0144784	0.0277452	0.0100283	0.0327464	0.0112381	0.017614	0.031566	0.0158642	0.0189605	0.0242796	0.014366	0.00980097	0.0131597	0.0347762	0.0326025	0.0111297	0.0484217	0.016298	0.0253103	0.0287793	0.0540932		N	0.00859173	0.0230022	0.012325
H	0.029425	0.0212672	0.0160775	0.0243271	0.00291296	0.0220864	0.0204692	0.0115992	0.0178574	0.0152255	0.00852059	0.00581846	0.0268949	0.029581	0.0166624	0.00528813	0.0490463	0.0215358	0.0356665	0.0236562	0.0253644		H	0.0178642	0.0142987	0.0260496	0.0302158	0.0141901	0.0135227	0.0279929	0.0122057	0.0175484	0.00989632	0.0129664	0.00744109	0.0239534	0.0142847	0.023392	0.00472464	0.0191377	0.0146892	0.0394436	0.0158257	0.0333632		H	-0.0128197	0.00854152	0.0120989
C	0.016138	0.0139627	0.0079119	0.0421785	0.0134686	0.0100568	0.00109069	0.0146597	0.0153667	0.0212391	0.0139237	0.00315405	0.00504279	0.0332834	0.0191089	0.00985167	0.0492759	0.011284	0.0245224	0.0201637	0.0365929		C	0.00954999	0.0310592	0.0231504	0.013017	0.00582713	0.0266586	0.0182206	0.0168356	0.0175647	0.00531427	0.000564743	0.0108961	0.0274286	0.0343978	0.0184111	0.0272082	0.00439116	0.00998353	0.0145261	0.0277909	0.0290934		C	-0.00263618	0.0141341	0.0144921
K	0.0269288	0.00893337	0.00762929	0.0146413	0.00573353	0.0187161	0.051543	0.0243447	0.0211839	0.0129863	0.00418245	0.0088133	0.0132903	0.0151228	0.0241905	0.00381001	0.0501085	0.0198183	0.0266867	0.0181738	0.00680501		K	0.0949775	0.023179	0.0268269	0.0203417	0.0336994	0.0326625	0.0346719	0.011906	0.0144599	0.0158357	0.0235971	0.0077021	0.0346101	0.0328873	0.0467136	0.0151273	0.0765629	0.0666162	0.0317863	0.0118957	0.053598		K	0.0103803	0.0330009	0.0485677
R	0.0148934	0.0155761	0.020222	0.0146849	0.0108338	0.0128457	0.0245899	0.0127508	0.015556	0.0142027	0.00859048	0.0132182	0.00995249	0.0137656	0.0168479	0.00983865	0.0211213	0.0200635	0.0181446	0.0121276	0.00481047		R	0.0418922	0.0264786	0.0171205	0.023592	0.00671586	0.0187373	0.0176748	0.011421	0.0167162	0.0144008	0.0131132	0.00725583	0.0101747	0.0213977	0.017726	0.00440442	0.0826662	0.0327495	0.0288028	0.0192999	0.0104677		R	0.0171269	0.010832	0.0118303
E	0.025252	-0.00113368	0.0013185	0.0147249	0.0124718	0.00706811	0.0284639	0.00807701	0.0271562	0.00477469	0.00953606	0.00651677	-0.0201271	0.0244413	0.0211371	-0.0045288	0.0385774	0.00749687	0.00579262	0.00114842	0.0172406		E	0.0434407	0.0243243	0.0333256	0.0235861	0.00817554	0.021678	0.0300652	0.0129442	0.0214042	0.0161229	0.0235852	0.014046	-0.00625441	0.0180093	0.0285339	0.0153517	0.032012	0.00318868	0.0260202	0.0349017	0.0276313		E	0.0357811	0.00133581	0.0084552
D	0.0406543	0.0198991	0.00405337	0.0151539	0.0144556	0.00821749	0.0170769	0.015981	0.0239643	0.00270637	0.0104855	0.0149197	0.0296552	0.0243911	0.0107802	0.00287391	0.0353827	0.0175063	0.0032701	0.0121168	0.0562372		D	0.0314877	0.0337257	0.0129838	0.0266667	0.0230569	0.0186449	0.0308818	0.014616	0.0128449	0.0137288	0.0197126	-0.00434108	0.0270826	0.0164677	0.00539538	0.0125287	0.00564705	0.00886236	0.0343108	0.00443337	0.0158485		D	0.0174326	0.00455025	0.0200641
*	N/A	N/A	N/A	N/A	N/A	N/A	N/A	N/A	N/A	N/A	N/A	N/A	N/A	N/A	N/A	N/A	N/A	N/A	N/A	N/A	N/A		*	N/A	N/A	N/A	N/A	N/A	N/A	N/A	N/A	N/A	N/A	N/A	N/A	N/A	N/A	N/A	N/A	N/A	N/A	N/A	N/A	N/A		*	N/A	N/A	N/A
[truncated: 40 more columns]

[truncated: 1 more sheets: P-value 2D aminoacid heatmap]
