# Supplementary material for: Context specificity of translation inhibitors revealed by toe-seq
Source: Research Square preprint supplement (doi:10.21203/rs.3.rs-3832009/v1), 2024-04-03
Supplement: Supplementary file 6 [file 637e52bc451a4db5db381e69.xlsx]

## Sheet: Title
Supplementary table 7
Ribosome stalling sites, positional, amino acid and codon preferences of ribosome stalling sites, preferences of stalling at combinations of codons and corresponding amino acids in different sites and its significance for translation inhibition by EtaA.

## Sheet: Codon heatmap
Stop efficiency at the corresponging triplet in the -2nd position while mRNA codon with specified index number is located in the P-site													Stop efficiency at the corresponging triplet in the E-site while mRNA codon with specified index number is located in the P-site													Stop efficiency at the corresponging triplet in the P-site while mRNA codon with specified index number is located in the P-site													Stop efficiency at the corresponging triplet in the A-site while mRNA codon with specified index number is located in the P-site
-2		Index number of mRNA codon located in the P-site											E		Index number of mRNA codon located in the P-site											P		Index number of mRNA codon located in the P-site											A		Index number of mRNA codon located in the P-site
		4	5	6	7	8	9	10	11	12	13				3	4	5	6	7	8	9	10	11	12				2	3	4	5	6	7	8	9	10	11				1	2	3	4	5	6	7	8	9
P	CCC	0.0481329	0.0047315	-0.00150351	-0.00962263	-0.013674	-0.0125095	-0.0115711	-0.00144347	-0.0164766	-0.0118265		P	CCC	0.0194002	0.0351407	0.00316211	-0.0120457	-0.0251379	-0.028171	-0.0280219	-0.0267612	-0.0331952	-0.0182034		P	CCC	0.0128706	0.016678	0.043755	-0.0142774	-0.0195376	-0.0396914	-0.040074	-0.033523	-0.0307728	-0.0407804		P	CCC	0.0296323	0.014038	0.0249757	0.0545995	0.014347	-0.00166256	-0.02869	-0.0286341	-0.0238883
P	CCT	0.0858827	0.00417566	0.00337145	-0.0101495	-0.0130473	-0.00839967	-0.0106599	0.00313918	-0.012509	-0.0113935		P	CCT	0.0371026	0.0313508	0.0120244	-0.0135597	-0.0291393	-0.0277976	-0.0238235	-0.0292515	-0.033017	-0.0172325		P	CCT	0.016194	0.0224661	0.0702015	-0.00729511	-0.0165667	-0.0434394	-0.0325654	-0.0276843	-0.0256747	-0.0390355		P	CCT	0.0258349	0.0338955	0.0358878	0.0740396	0.0136264	-0.000836134	-0.0253381	-0.0285895	-0.0243307
P	CCA	0.115401	0.0196241	0.00187608	-0.00826946	-0.00210566	-0.00814682	-0.00635472	0.0115767	-0.00945414	-0.00898113		P	CCA	0.0448798	0.0653299	0.0142776	-0.00533901	-0.0312628	-0.0273417	-0.0287167	-0.0324194	-0.026075	-0.00458236		P	CCA	0.0187973	0.0228306	0.107911	0.00757534	-0.0112061	-0.0380094	-0.041973	-0.0338466	-0.0254881	-0.0332707		P	CCA	0.0183591	0.0318894	0.0445689	0.0842014	0.024782	0.0103425	-0.0220319	-0.0204437	-0.0257421
P	CCG	0.0833389	0.00851612	-0.00558524	-0.00797178	-0.00930999	-0.0110594	-0.00766517	0.00734998	-0.0139588	-0.0146332		P	CCG	0.0280229	0.0442994	0.0157017	-0.00672709	-0.0242526	-0.0283742	-0.0291555	-0.0225268	-0.0252097	-0.0193737		P	CCG	0.0209969	0.0225271	0.0900268	0.00682099	-0.0103568	-0.0405324	-0.0309967	-0.0292349	-0.031428	-0.0348131		P	CCG	0.0291366	0.0219469	0.0206194	0.0640765	0.00823115	-0.0141978	-0.023293	-0.0235704	-0.0193251
L	CTC	0.0626624	0.0249181	0.00458084	-0.0122338	-0.017869	-0.0107765	-0.0187949	-0.0144963	-0.0168634	-0.0127613		L	CTC	0.0335169	0.0647179	0.0273398	0.00540855	-0.017883	-0.0206124	-0.0142126	-0.0150365	0.00209054	-0.0164849		L	CTC	0.0208637	0.0368179	0.0586376	0.0192203	-0.00594649	-0.0157698	-0.0184559	-0.0130926	-0.0197613	-0.0278146		L	CTC	0.0197639	0.00791823	0.0185543	0.0618687	0.0304403	0.00332389	-0.00814713	-0.0223374	-0.0153467
L	CTT	0.107821	0.0278003	-0.00399277	-0.0255741	-0.0191952	-0.0124366	-0.0107086	-0.0138318	-0.0126243	-0.0164374		L	CTT	0.0432332	0.0928434	0.0390526	-0.00787666	-0.0105446	-0.023645	-0.0130352	-0.0132783	0.0117299	-0.0130388		L	CTT	0.0187887	0.0413222	0.0624606	0.0096146	-0.00292982	-0.0283424	-0.0204775	-0.00854652	-0.0118414	-0.0280605		L	CTT	0.0179523	0.012101	0.0212529	0.077737	0.0392291	-0.00642352	-0.0285812	-0.0198288	-0.024205
L	CTA	0.0899628	0.029701	-0.00704847	-0.00211289	-0.0173808	-0.0109794	-0.0153934	0.00131656	-0.0107605	-0.0168842		L	CTA	0.0590601	0.114708	0.0297296	0.000913974	0.00536222	-0.0105572	-0.0100397	-0.00256207	0.00361613	-0.0147251		L	CTA	0.00742822	0.0531137	0.0635987	0.0214261	-0.0022128	-0.0248987	-0.0195651	-0.0127238	-0.00736178	-0.00517331		L	CTA	0.0165059	0.0118229	0.0963481	0.0897764	-0.0240602	-0.0361723	-0.047859	-0.0382236	-0.0332153
L	CTG	0.0908758	0.0496314	-0.00370493	-0.0120904	-0.0140201	-0.0124548	-0.0115672	-0.00348316	-0.00660563	-0.0186557		L	CTG	0.0430553	0.11232	0.0314	0.0017205	-0.00727613	-0.0157733	-0.0162847	-0.0110162	0.0141306	-0.00951545		L	CTG	0.0315272	0.0413076	0.11914	0.0327833	0.00176246	-0.00938944	-0.0162706	-0.0115172	-0.0146162	-0.0223043		L	CTG	0.0182258	-0.000170625	0.023997	0.0700646	0.0378538	0.00708933	-0.0217268	-0.0153284	-0.0110636
H	CAC	0.145402	0.0265041	0.00509215	-0.0162358	-0.0218769	-0.016484	-0.0159267	-0.0192796	-0.0104702	-0.0103583		H	CAC	0.0376584	0.0996745	0.0446954	0.0037842	-0.0131356	-0.017873	-0.00989893	-0.0131399	-0.0190487	-0.0128199		H	CAC	0.0383309	0.101632	0.0997668	0.0262029	0.00552787	-0.0143344	-0.0194963	-0.0121079	-0.01314	-0.0200403		H	CAC	0.0135895	0.00340685	0.0246001	0.095398	0.0383479	0.0114742	-0.0116845	-0.016177	-0.0152521
H	CAT	0.158948	0.0385684	-0.0100089	-0.00892919	-0.0254574	-0.00979136	-0.0237962	-0.0269428	-0.0153484	-0.0108335		H	CAT	0.044147	0.109629	0.0579832	-0.00515823	-0.0195437	-0.0160065	-0.0099569	-0.00878732	-0.0230552	-0.00939947		H	CAT	0.0174843	0.0889122	0.116996	0.0203522	0.000209966	-0.0131639	-0.0185146	-0.0154902	-0.00473055	-0.0171269		H	CAT	-0.00269512	-0.000266323	0.0290476	0.116359	0.0314098	-0.00701391	-0.0175083	-0.0162841	-0.0145455
Q	CAA	0.104506	0.0408354	0.00990219	-0.0244843	-0.0203706	-0.0146817	-0.0255419	-0.0180675	-0.0130026	-0.0246575		Q	CAA	0.0632356	0.164312	0.0547915	-0.00766581	-0.0110881	-0.0187935	-0.00680351	-0.00746246	3.91544e-05	-0.0207844		Q	CAA	0.0414374	0.0442371	0.111378	0.0359295	0.00791644	-0.0219817	-0.0149793	-0.0118962	-0.0128997	-0.00180117		Q	CAA	0.00946072	0.0104347	0.0479559	0.129023	0.0494424	0.00784899	-0.0161982	-0.013048	-0.00202642
Q	CAG	0.0854567	0.0566204	0.0141745	-0.0105209	-0.0182112	-0.0158205	-0.0196673	-0.0195327	-0.00303464	-0.0137555		Q	CAG	0.0602808	0.121994	0.0490122	-0.00770876	-0.0232388	-0.0208257	-0.00881381	-0.00617538	-0.00723013	-0.0115984		Q	CAG	0.0282139	0.0364275	0.0872621	0.0229605	-0.00288828	-0.0165576	-0.0158702	-0.0125686	-0.0127128	-0.00381506		Q	CAG	0.0230592	0.00974029	0.0434081	0.120578	0.0388242	0.00167926	-0.00801436	-0.0138883	-0.0102883
R	CGC	0.0968687	0.0126672	0.000611493	-0.023801	-0.0269012	-0.0220828	-0.0201552	-0.0250499	-0.0174285	-0.011421		R	CGC	0.0520304	0.0871785	0.0205862	-0.00320479	-0.010566	-0.0166083	-0.014461	-0.0167839	-0.0237001	-0.0225526		R	CGC	0.015481	0.0262691	0.0613016	0.0275266	0.00888044	-0.00648211	-0.0178258	-0.0146633	-0.0166993	-0.0176787		R	CGC	0.030878	0.012299	0.0417405	0.058967	0.0224707	0.000131927	-0.0142012	-0.0131409	-0.00934438
R	CGT	0.0958062	0.0237326	-0.00309677	-0.0260892	-0.0312074	-0.0199275	-0.0172256	-0.0261659	-0.0180912	-0.0124157		R	CGT	0.0582337	0.106428	0.0255197	-0.00445021	-0.0112611	-0.0167138	-0.0129318	-0.0146525	-0.0301072	-0.0216062		R	CGT	0.016985	0.0181152	0.0592468	0.041078	0.00976364	-0.00999943	-0.0184991	-0.0143581	-0.0149805	-0.0186385		R	CGT	0.0316279	0.0037981	0.0588683	0.0671979	0.0202114	0.0028349	-0.00436299	-0.0156075	-0.00963298
R	CGA	0.0912792	0.0197856	-0.0307236	-0.0155198	-0.0282236	-0.018827	-0.0181581	-0.0193458	-0.0106758	-0.00714421		R	CGA	0.0597606	0.0931888	0.00334838	-0.00735084	-0.0232301	-0.017291	-0.0113172	-0.0173085	-0.0231409	-0.0155898		R	CGA	0.0215383	0.0631642	0.0492261	-0.00422713	-0.016488	-0.0254818	-0.0231739	-0.0169365	-0.0227377	-0.0515731		R	CGA	0.0157695	0.0242221	0.144296	0.108909	0.0460258	-0.00195316	-0.0221911	-0.0119921	-0.0142668
R	CGG	0.0926343	0.0236412	-0.00329235	-0.0148982	-0.0215231	-0.0177592	-0.0122809	-0.0236304	-0.0139114	-0.0158461		R	CGG	0.0453623	0.0862147	0.0156985	0.002678	-0.0089232	-0.0125221	-0.0120734	-0.00874086	-0.0212281	-0.00946169		R	CGG	0.0205726	0.0310596	0.0609121	0.0282147	0.00693001	-0.0122721	-0.0132814	-0.00873977	-0.0142999	-0.0130607		R	CGG	0.036049	0.0162064	0.0772047	0.0623012	0.0223951	0.00236552	-0.0161712	-0.0118284	-0.00826335
S	TCC	0.0381476	0.00539916	0.00220824	-0.00962785	-0.0206722	-0.0160932	-0.0236176	-0.033316	-0.0124002	-0.0119657		S	TCC	0.0137414	0.0456237	0.0151461	-0.00752578	-0.0163383	-0.0229948	-0.0245799	-0.0278774	-0.0250588	-0.0123755		S	TCC	0.0254183	0.0234689	0.0454455	0.0111051	-0.00155842	-0.00863517	-0.0208809	-0.0199845	-0.0182123	-0.0236383		S	TCC	0.028402	0.0147157	0.0133052	0.0423962	0.0238379	0.00512416	-0.00358877	-0.018747	-0.0158288
S	TCT	0.0718378	0.0237221	0.00578226	-0.0147355	-0.0185069	-0.0141601	-0.0131959	-0.0280317	-0.0202641	-0.00978037		S	TCT	0.016743	0.0503914	0.014867	0.000502597	-0.0167316	-0.0239874	-0.00583983	-0.0232064	-0.0206358	-0.0145837		S	TCT	0.0348463	0.0390975	0.0896007	0.0309245	0.00357437	-0.010081	-0.0165345	-0.012597	-0.0200949	-0.0153244		S	TCT	0.0244292	0.0104542	0.0186768	0.0798886	0.029978	0.00424284	0.00173785	-0.0223428	-0.013198
S	TCA	0.0779581	0.0365299	0.0022848	-0.0215158	-0.0222286	-0.0150352	-0.0172861	-0.0191687	-0.00536374	-0.00903853		S	TCA	0.0175632	0.0875704	0.0376607	-0.00160834	-0.0180182	-0.0179963	-0.0225274	-0.00727504	-0.013304	-0.0191572		S	TCA	0.029725	0.0551133	0.122932	0.0497774	-0.00151378	-0.0134705	-0.0178873	-0.0176077	-0.0165322	-0.0101391		S	TCA	0.0352337	0.0202417	0.0212015	0.0804526	0.0220719	0.00833077	-0.018575	-0.0214069	-0.0151662
S	TCG	0.0612557	0.0254302	0.0105105	-0.0207533	-0.0263859	-0.0103525	-0.0172335	-0.0194089	-0.00968847	-0.0113705		S	TCG	0.0248744	0.0426351	0.0214101	-0.00752574	-0.0244237	-0.0169884	-0.0134257	-0.0185257	-0.0150083	-0.0187445		S	TCG	0.0208992	0.0426542	0.0669446	0.0202146	-0.00241626	-0.0159655	-0.0135952	-0.0159691	-0.0159002	-0.0172067		S	TCG	0.0571585	0.0298888	0.0266041	0.0746684	0.0185236	0.00405309	-0.0157424	-0.0263456	-0.0183672
F	TTC	0.0636548	0.00489849	0.000895923	-0.0186379	-0.00557399	-0.0123808	-0.0175111	-0.00130137	-0.0118251	-0.0125604		F	TTC	0.0280543	0.0744485	0.0536283	0.0084927	-0.00815927	-0.0109066	-0.010762	-0.012168	-0.00601696	-0.0132758		F	TTC	0.0433256	0.106908	0.151577	0.0649084	0.00964204	-0.00151919	-0.00551763	-0.00342685	-0.0140488	0.00793496		F	TTC	0.016309	-0.000486526	-0.00596122	0.0436468	0.0399726	0.0035549	-0.00940411	-0.0150333	-0.0107108
F	TTT	0.0926123	0.0309321	-0.00141657	-0.0148435	-0.0150468	-0.0199999	-0.00616967	0.00873096	-0.0101259	-0.0131313		F	TTT	0.041837	0.11226	0.0524307	0.0193573	-0.00925438	0.000495917	-0.0034019	-0.016155	0.0106741	-0.00918604		F	TTT	0.0622731	0.110199	0.169301	0.0712251	0.00652671	-0.00248651	-0.0113087	0.00933028	-0.0114952	-0.00103574		F	TTT	0.0151678	0.00572128	-0.00326222	0.0679138	0.0295864	0.0183988	-0.00949757	-0.0174113	-0.0246673
L	TTA	0.105059	0.0558993	-0.00354086	-0.0200943	-0.0166015	-0.00160979	-0.00795851	-0.000606124	-0.0156522	-0.02256		L	TTA	0.0688558	0.138717	0.0508209	0.0096726	0.00294605	-0.012652	-0.01976	-0.00742918	0.0309446	-0.00461583		L	TTA	0.0484977	0.0854621	0.152977	0.0749902	0.0217078	-0.0034197	0.0164638	-0.00190817	0.00667743	0.00111868		L	TTA	0.00826435	0.00238138	0.045376	0.0834461	0.0260005	0.0142165	-0.00512625	-0.0260002	-0.0200958
L	TTG	0.0954014	0.0487567	-0.00214573	-0.00670768	-0.0159496	-0.00431445	-0.00724369	-0.00837546	-0.0132207	-0.0138292		L	TTG	0.0442697	0.094632	0.0307349	-0.00676917	-0.0082793	-0.00697248	-0.0129952	-0.00857536	0.0194562	-0.00523312		L	TTG	0.0184041	0.0530489	0.113459	0.0485929	0.00479761	-0.0136859	-0.0159281	-0.0142507	-0.00869527	0.00593447		L	TTG	0.016351	0.00486678	0.0669989	0.0978897	0.0376059	-0.000997585	-0.0149182	-0.0106764	-0.0114977
Y	TAC	0.117597	0.0291181	0.0082641	-0.0107115	-0.00522882	-0.0184021	-0.0127447	0.00223532	-0.0127742	-0.00906524		Y	TAC	0.0268782	0.11981	0.0541879	0.0196183	-0.00600352	-0.0142526	-0.0186035	-0.0163226	-0.0123313	-0.0215364		Y	TAC	0.0546841	0.113942	0.157757	0.0426827	0.00971021	-0.0122122	-0.0106906	-0.0185874	-0.00511636	0.00199775		Y	TAC	0.0197717	0.00889532	0.0159941	0.0860184	0.0447458	0.00613722	-0.0115066	-0.0238371	-0.0119417
Y	TAT	0.127345	0.0306045	0.00710024	-0.00743761	-0.0098418	0.00368981	-0.00904085	-0.00537115	-0.0167736	-0.0103446		Y	TAT	0.0351721	0.129643	0.0502555	0.00741855	-0.0337435	-0.00963728	-0.0171461	-0.00800712	-0.00165348	-0.00955531		Y	TAT	0.0468179	0.105177	0.163915	0.0332655	0.0268898	-0.0480329	-0.0179	-0.00963793	-0.0041783	-0.0112544		Y	TAT	0.0125259	0.00480966	0.0259421	0.106951	0.0410119	0.00547815	-0.0165392	-0.0320107	-0.0123463
*	TAA	0	0	0	0	0	0	0	0	0	0		*	TAA	0	0	0	0	0	0	0	0	0	0		*	TAA	0	0	0	0	0	0	0	0	0	0		*	TAA	0.0402922	0.177804	0.116741	0.236822	0.0346663	-0.0118708	-0.00481932	-0.0144415	-0.02818
*	TAG	0	0	0	0	0	0	0	0	0	0		*	TAG	0	0	0	0	0	0	0	0	0	0		*	TAG	0	0	0	0	0	0	0	0	0	0		*	TAG	0.0303885	0.202108	0.117577	0.18738	0.0497804	-0.0221415	-0.0503131	0.000378159	-0.0257864
C	TGC	0.0986314	0.0300752	0.0156854	-0.0205666	-0.0153678	-0.0125567	-0.0134226	-0.0128203	-0.0148721	-0.00930213		C	TGC	0.0251375	0.0797333	0.0289757	0.00764707	-0.00920552	-0.0143382	-0.00823965	-0.0129348	-0.017813	-0.0107149		C	TGC	0.024715	0.0329133	0.126914	0.0592489	0.0183432	-0.0116241	-0.0184024	-0.00943099	-0.00984473	0.00482236		C	TGC	0.0265271	0.00143057	0.00555905	0.0360069	0.00657833	-0.00633441	-0.0186945	-0.0216482	-0.0229273
C	TGT	0.106749	0.045324	0.0188691	-0.00362517	-0.0211337	-0.00811528	-0.0163794	-0.00507463	-0.0108993	-0.0159539		C	TGT	0.0271145	0.0849415	0.0331391	0.00437949	-0.00280837	-0.00605158	-0.011536	-0.0126074	-0.00675153	-0.00592395		C	TGT	0.0201113	0.0391241	0.128581	0.0518097	0.008112	-0.0101494	-0.0137782	-0.0123203	-0.0134514	0.000287175		C	TGT	0.0223194	0.00840566	0.0146374	0.0413584	0.00885887	-0.00629324	-0.0340129	-0.0279894	-0.0192391
*	TGA	0	0	0	0	0	0	0	0	0	0		*	TGA	0	0	0	0	0	0	0	0	0	0		*	TGA	0	0	0	0	0	0	0	0	0	0		*	TGA	0.0380897	0.112576	0.131549	0.149775	0.00423851	-0.0452064	-0.0381021	-0.0408278	-0.0333094
W	TGG	0.106184	0.0125787	0.00504898	-0.01125	-0.0106806	-0.0072944	-0.0121161	-0.0015701	-0.00590732	-0.0121669		W	TGG	0.0263149	0.139188	0.0335047	0.0119981	-0.00374694	-0.00411098	-0.0101654	0.00123746	-0.0138238	-0.00636052		W	TGG	0.0188069	0.0459449	0.0737345	0.0159776	-0.000756284	-0.0151513	-0.0185404	-0.00409468	-0.0116576	0.00850318		W	TGG	0.0459543	0.0169379	0.0706747	0.0772754	0.00834261	0.00187354	-0.0142778	-0.012253	-0.0137597
T	ACC	0.109	0.0263599	0.00147247	-0.0253034	-0.0205588	-0.0186508	-0.0246532	-0.0304519	-0.0107566	-0.0122486		T	ACC	0.0308135	0.0760916	0.0446106	0.0169894	-0.0139142	-0.0147366	-0.0140025	-0.0168444	-0.012216	-0.0127975		T	ACC	0.0192895	0.0448558	0.0796394	0.0266107	-0.00350036	-0.00489997	-0.0222864	-0.0107205	-0.0167434	-0.0151152		T	ACC	0.0339246	0.0225069	0.0137893	0.065191	0.0325353	0.00498338	-0.00983162	-0.0206003	-0.0143511
T	ACT	0.12591	0.0450447	0.00619137	-0.0168098	-0.0124162	-0.0117434	-0.020051	-0.0125061	-0.0152699	-0.0138513		T	ACT	0.0347114	0.101295	0.0556982	0.0192788	-0.0222773	-0.0169062	-0.0119717	-0.012529	-0.00765228	-0.0103021		T	ACT	-0.000948315	0.0288528	0.0712227	0.0211439	-0.00480484	-0.0264024	-0.0224897	-0.0114578	-0.018216	-0.01202		T	ACT	0.0340228	0.0273944	0.0381175	0.0852839	0.0462347	0.00916571	-0.00531938	-0.019952	-0.0138177
T	ACA	0.130694	0.0355468	0.0124169	-0.0224743	-0.0153513	-0.0176835	-0.0164723	-0.0164697	-0.0105788	-0.00285666		T	ACA	0.0478613	0.107145	0.0437791	-0.000141765	-0.0234347	-0.0220977	-0.0165116	-0.00514474	0.00144627	-0.0137321		T	ACA	0.00602121	0.0560082	0.0905552	0.0271419	-0.0104774	-0.0259698	-0.0160428	-0.013653	-0.00304972	-0.00116744		T	ACA	0.0375553	0.0617563	0.0478198	0.112131	0.0234926	-0.00599912	-0.0307429	-0.0363329	-0.0281658
T	ACG	0.111781	0.0432959	0.0133381	-0.0172075	-0.0182966	-0.0133734	-0.0155575	-0.0185619	-0.00998461	-0.0115267		T	ACG	0.0428811	0.0861339	0.0416872	0.011351	-0.00653632	-0.013724	-0.0116265	-0.0110825	-0.0105269	-0.0120499		T	ACG	0.0135246	0.0335637	0.0878737	0.0351806	-0.00470787	-0.0161641	-0.0143228	-0.00990365	-0.0160758	0.00382129		T	ACG	0.0541732	0.0348927	0.0452579	0.112097	0.0287295	-0.0027247	-0.0209946	-0.0240223	-0.0203543
I	ATC	0.124521	0.0570873	-0.000879828	-0.00734247	-0.0174547	-0.0174914	-0.0053169	-0.0210357	-0.00942373	-0.0184159		I	ATC	0.106675	0.159496	0.0764514	0.0280425	-0.000178624	-0.000606512	0.00233178	-0.00629444	0.0336192	-0.0121572		I	ATC	0.0300233	0.0727003	0.196331	0.0679887	0.0265707	0.000772853	-0.00747952	-0.0118103	-0.00886148	0.0163253		I	ATC	0.00913755	0.00687272	0.0223372	0.069404	0.0501905	0.00318355	-0.0140999	-0.0149463	-0.00812673
I	ATT	0.104277	0.0426243	0.00189469	-0.0098424	-0.0131204	-0.00607621	-0.00410007	-0.00962589	-0.0237778	-0.0131803		I	ATT	0.124758	0.151728	0.0518288	0.025971	0.00209685	0.0124207	-0.0107644	0.00284017	0.0152739	-0.00248233		I	ATT	0.0254303	0.0593213	0.200399	0.0866381	0.0311878	0.00188005	-0.00287028	-0.00062905	-0.0071509	0.00777288		I	ATT	-0.00861525	0.00613205	0.0306355	0.116276	0.0780363	-0.00444836	-0.00638314	-0.0240229	-0.00892018
I	ATA	0.123231	0.0322295	-0.0201081	-0.0170505	0.00135606	-0.000100365	0.00304273	-0.0188543	-0.000979353	-0.0165292		I	ATA	0.142623	0.14609	0.0475441	-0.00576978	-0.00440641	0.00201075	0.00225723	0.00405277	0.0218822	-0.0179178		I	ATA	0.0382009	0.0975857	0.189513	0.0540519	0.0258396	0.000788952	-0.000491823	0.0020029	0.0131212	0.0314179		I	ATA	-0.0394189	0.00241989	0.0784745	0.157091	0.0214157	-3.08483e-05	-0.0261315	-0.0319294	-0.0129189
M	ATG	0.117838	0.058512	0.00786598	0.00147599	-0.0140698	-0.00240452	-0.0152697	0.0138521	-0.0130199	-0.0168014		M	ATG	0.0434561	0.142252	0.0680777	0.016397	-0.011865	-0.0107083	-0.00304361	-0.00995805	0.0169584	-0.0100939		M	ATG	0.030091	0.0439092	0.15104	0.0559176	0.0132358	-0.0146926	-0.011829	-0.00925447	0.00127443	0.00981603		M	ATG	0.0078738	-0.00882782	0.0355164	0.0968086	0.027655	0.0155363	-0.00608661	-0.0191466	-0.0140947
N	AAC	0.0902796	0.0497498	-0.00342099	-0.0178645	-0.0272744	-0.0196144	-0.0102562	-0.0300723	-0.0109872	-0.0119826		N	AAC	0.0591663	0.0907312	0.0316765	0.00517373	-0.015089	-0.0173283	-0.0171882	-0.0160323	-0.0015094	-0.013713		N	AAC	0.0278811	0.065938	0.131479	0.0339573	-0.00405664	-0.0118228	-0.0147238	-0.00535995	-0.0239561	-0.0215665		N	AAC	0.0206541	0.019533	0.0551828	0.158305	0.0742611	0.0134481	-0.0161473	-0.0152442	-0.015167
N	AAT	0.084609	0.0453277	-0.00323115	-0.0171102	-0.0213336	-0.0242114	-0.0121582	-0.0160708	-0.0262501	-0.0227781		N	AAT	0.0463649	0.0900129	0.035912	-0.0187408	-0.0112566	-0.0150103	-0.0106055	-0.00162476	-0.0142255	-0.0126829		N	AAT	0.0300902	0.0339621	0.128572	0.033308	-0.0124948	-0.0321246	-0.0139823	-0.00443505	-0.00227772	0.00158309		N	AAT	0.0188797	0.0430049	0.0969	0.208537	0.025598	0.00368734	-0.0210566	-0.018083	-0.0188958
K	AAA	0.151701	0.034476	-0.0152739	-0.0222037	-0.0204088	-0.0216736	-0.0150231	-0.0290944	-0.00244497	-0.0136647		K	AAA	0.0827613	0.112409	-0.0127501	-0.00374963	-0.0326783	-0.0196619	-0.00452514	-0.00371995	-0.0134043	0.00444394		K	AAA	0.0416962	0.0897166	0.0526057	0.0188778	0.00451058	-0.0136564	-0.0112339	-0.0240444	-0.0169857	-0.0199749		K	AAA	-0.0112453	0.0393416	0.202829	0.205317	0.0636962	0.0147537	-0.00843329	0.000397965	-0.00597329
K	AAG	0.121027	0.0427437	-0.02161	-0.0290891	-0.0225908	-0.0216211	-0.0153708	-0.0244739	-0.0107743	-0.0178565		K	AAG	0.0783439	0.081237	-0.00644139	-0.00719881	-0.0133098	-0.0172768	-0.0157769	-0.0191484	-0.00816694	-0.0149842		K	AAG	0.0221493	0.0421772	0.025153	0.00452901	-0.0115912	-0.00793658	-0.0210925	-0.0101335	-0.0136564	-0.0344109		K	AAG	-0.00192798	0.0532195	0.248125	0.202143	0.0658125	0.0133148	-0.0209251	-0.00849902	0.00415658
S	AGC	0.0708284	0.023573	0.00363471	-0.0171961	-0.0177867	-0.0227105	-0.0189686	-0.0291917	-0.0124488	-0.0127733		S	AGC	0.0245813	0.0593404	0.0258981	-0.00215544	-0.0243425	-0.0211218	-0.0152785	-0.0079775	-0.0181964	-0.00782999		S	AGC	0.016495	0.050749	0.0683648	0.0186065	-0.0104951	-0.00946647	-0.0182766	-0.0153959	-0.0146858	-0.0259532		S	AGC	0.0375802	0.016641	0.0308634	0.0763702	0.035876	0.0104163	-0.0057912	-0.0160443	-0.0137802
S	AGT	0.05804	0.0264116	0.0079907	-0.0106573	-0.0132046	-0.0126474	-0.0147144	-0.00891395	-0.00697451	-0.0135574		S	AGT	0.0107788	0.0509461	0.0253312	0.00158272	-0.0120258	-0.0143084	-0.00833248	-0.0111931	-0.0157584	-0.00586033		S	AGT	0.0126404	0.0348686	0.0530276	-0.00369895	-0.000897391	-0.023944	-0.0142621	-0.0167561	-0.00715845	-0.0159871		S	AGT	0.0835552	0.0742355	0.0566449	0.124365	0.0225595	-0.0307983	-0.0435525	-0.0497934	-0.0282179
R	AGA	0.115733	0.0407975	-0.0323715	-0.025811	-0.018267	-0.0165111	-0.0144674	-0.0183889	-0.0183663	-0.0150946		R	AGA	0.0860923	0.135888	0.0121624	-0.00503971	-0.0150033	-0.0100374	-0.0091068	-0.00320543	0.00705454	-0.0152041		R	AGA	-0.00243803	0.0203251	0.0409218	0.00950466	0.00133267	-0.0219028	-0.0180975	-0.00742671	-0.017559	-0.0167864		R	AGA	0.0121832	0.053131	0.188564	0.204176	0.0443917	-0.00890617	-0.0252484	-0.0280061	-0.0260948
R	AGG	0.0897433	0.0194863	-0.00530787	-0.0276898	-0.0228504	-0.0203074	-0.0163471	-0.0252228	-0.00929302	-0.0100085		R	AGG	0.0691561	0.11867	0.0253603	0.00445945	-0.0147305	-0.0155265	-0.00343888	-0.0101619	-0.00624362	-0.0151138		R	AGG	0.00947055	0.0149425	0.0576336	0.0206272	-0.00337841	-0.00908063	-0.0106515	-0.00560702	-0.0141912	0.0136858		R	AGG	0.0265899	0.0385097	0.147438	0.143747	0.0317377	-0.00843249	-0.0149365	-0.0143268	-0.00597211
A	GCC	0.0399034	0.0186465	0.00283137	-0.0173653	-0.0210395	-0.0199322	-0.0210029	-0.0226389	-0.0149217	-0.0131198		A	GCC	0.0125331	0.0631653	0.0265346	0.00879932	-0.0203691	-0.0226522	-0.0166738	-0.0190436	-0.0251231	-0.0107095		A	GCC	0.0201792	0.0269137	0.0820968	0.0381686	-0.00236756	-0.0112118	-0.0176693	-0.0139027	-0.0131297	-0.00560688		A	GCC	0.0445689	0.021792	0.0103968	0.0392126	0.0234612	0.00146654	-0.0174517	-0.0182306	-0.0175472
A	GCT	0.05234	0.0399976	0.00235731	-0.00557891	-0.0213736	-0.0213097	-0.0166198	-0.0219949	-0.014502	-0.0129941		A	GCT	0.0252354	0.0795952	0.032631	0.0103841	-0.00889548	-0.0253142	-0.0141703	-0.0222967	-0.0254925	-0.0151318		A	GCT	0.0322147	0.046556	0.0959554	0.0429301	-0.00326945	-0.0152969	-0.00980897	-0.0100952	-0.0109949	-0.0157534		A	GCT	0.0327121	0.0126086	0.018308	0.0421857	0.0271296	0.00393703	-0.0108237	-0.0142067	-0.0128443
A	GCA	0.0667192	0.0576335	0.00314215	-0.0160673	-0.0209916	-0.013345	-0.00780218	-0.0157889	-0.0102428	-0.0111736		A	GCA	0.0276621	0.107953	0.0401266	0.0188822	-0.00760609	-0.0216529	-0.013443	-0.00632176	-0.0198923	-0.00628206		A	GCA	0.0336486	0.0456885	0.114745	0.0681593	0.0154497	-0.0076128	-0.0135537	-0.0146012	-0.0108643	-0.0130477		A	GCA	0.0332847	0.00314802	0.011428	0.049147	0.0268931	0.00811142	-0.00398427	-0.0209848	-0.0119844
A	GCG	0.037036	0.0235905	0.00438878	-0.00956499	-0.0181417	-0.0124803	-0.0162886	-0.0209092	-0.013784	-0.00843306		A	GCG	0.0187378	0.068489	0.0297288	0.00780185	-0.0194721	-0.0208695	-0.0189757	-0.0152081	-0.0273945	-0.0149691		A	GCG	0.0188895	0.0349919	0.0828383	0.0379305	0.0102322	-0.0163625	-0.0195524	-0.0142987	-0.0172142	-0.00403191		A	GCG	0.0513719	0.02267	0.0169545	0.0514636	0.0174037	-0.00465729	-0.00874081	-0.0189559	-0.0145337
V	GTC	0.0924047	0.0294121	0.00577601	-0.0220827	-0.0133577	-0.0109216	-0.0191054	-0.00821452	-0.0219011	-0.0129939		V	GTC	0.0665676	0.124424	0.0651938	0.0187728	-0.00607245	-0.00383589	-0.00490819	-0.00417154	0.0208249	-0.00895386		V	GTC	0.0172721	0.0370446	0.0844274	0.0461153	0.0224232	-0.00789971	-0.0181147	-0.00694453	-0.0179397	-0.0015128		V	GTC	0.0166848	0.000982693	0.00583834	0.0604538	0.0351468	0.0145302	-0.00970262	-0.0155216	-0.00966489
V	GTT	0.107863	0.0397595	0.0026822	-0.00673209	-0.0189214	-0.0184118	-0.00224788	-0.0154974	-0.0164951	-0.0119893		V	GTT	0.0901703	0.108462	0.0610455	0.0346488	-0.000839075	-0.0116753	-0.00420024	-0.00861523	-0.000525967	-0.0209243		V	GTT	0.00518186	0.0270043	0.10382	0.061673	0.0228562	-0.00397922	-0.00726935	-0.0087827	-0.00763675	-0.014509		V	GTT	0.01327	0.0115017	0.00749096	0.0650496	0.0408615	0.00700204	-0.0148304	-0.0148895	-0.0104716
V	GTA	0.125895	0.0287108	0.0151442	-0.00393069	-0.00257074	-0.0148715	-0.00529828	-0.0140376	-0.0029041	-0.013694		V	GTA	0.0912747	0.150638	0.0726234	0.0260166	0.00280142	-0.00888218	0.00570286	-0.000150969	0.0149908	-0.00654287		V	GTA	0.00841119	0.0610397	0.113842	0.0972145	0.0231672	-1.91865e-05	-0.0087578	-0.00586942	-0.00803772	-0.00486696		V	GTA	-0.0076322	0.00749548	0.00217358	0.0605076	0.0399125	0.0135638	-0.0233429	-0.00883887	-0.010141
V	GTG	0.0918488	0.0281467	0.00828363	-0.0198712	-0.0167069	-0.0135358	-0.0240977	-0.0085262	-0.0148119	-0.0148758		V	GTG	0.068234	0.096188	0.0509308	0.0139534	-0.00520316	-0.00350367	0.00243344	-0.00278503	0.00513553	-0.0107291		V	GTG	0.0105261	0.0393157	0.107106	0.0432595	0.0170966	-0.00449901	-0.00394101	-0.00698954	-0.0126593	0.00458721		V	GTG	-0.000521257	0.00893949	0.0159594	0.0598396	0.0328203	0.0219324	-0.00817837	-0.0141137	-0.00577698
D	GAC	0.0149933	0.017684	0.00785535	-0.0351879	-0.0209	-0.0171659	-0.0172301	-0.0168421	-0.0103844	-0.00925281		D	GAC	0.0176304	0.0495386	0.0069816	-0.0171686	-0.0321362	-0.0216886	-0.0186015	-0.0202192	-0.0241744	-0.0143911		D	GAC	0.0377084	0.0365396	0.0393989	0.0115017	0.00269649	-0.00948985	-0.0139262	-0.0193825	-0.0155753	-0.024627		D	GAC	0.0526058	0.0252626	0.0540415	0.201367	0.0710871	0.0110255	-0.0126145	-0.009807	-0.00904007
D	GAT	0.0282645	0.0150667	-0.00993727	-0.0335838	-0.0123583	-0.0198669	-0.0156353	-0.0167087	0.00375645	-0.00731374		D	GAT	0.0341875	0.0718651	0.0164333	-0.0218999	-0.0120129	-0.0194793	-0.0150823	-0.0175269	-0.0142279	-0.0203868		D	GAT	0.0317726	0.0347288	0.0536821	0.00398245	-4.45579e-05	-0.0208397	-0.0196726	-0.00512352	-0.00442461	-0.0292151		D	GAT	0.0358637	0.0395011	0.0752062	0.221368	0.0739781	0.00433946	-0.0243385	-0.0113932	-0.0166429
E	GAA	0.0682658	0.0277089	-0.00934646	-0.022387	-0.0132654	-0.00968065	-0.0119725	-0.015231	-0.0144209	-0.017883		E	GAA	0.0465588	0.0967739	0.0119743	-0.00338	-0.0178013	-0.0264335	-0.0169512	-0.0129854	-0.0200806	-0.0068951		E	GAA	0.0181131	0.0389361	0.0301493	0.0146953	-0.00401318	-0.00506897	-0.0166748	-0.0135204	-0.0152351	-0.0117756		E	GAA	0.036257	0.0325547	0.116786	0.199405	0.0658509	0.0240914	0.0132385	-0.0139783	0.00786073
E	GAG	0.0216896	0.0204575	-0.00914712	-0.0213034	-0.0191641	-0.0188262	-0.0168485	-0.0183688	-0.00853848	-0.0129718		E	GAG	0.0355274	0.0557098	0.00430451	-0.0111245	-0.0212506	-0.0196145	-0.0149818	-0.0202467	-0.0210809	-0.001849		E	GAG	-0.00314945	0.0194913	0.0143094	-0.00765302	-0.00640362	-0.00521009	-0.0146647	-0.0127175	-0.00979951	-0.00850219		E	GAG	0.0548234	0.0409379	0.106914	0.182495	0.0628558	0.0166588	-0.00397877	-0.00456676	-0.0112746
G	GGC	0.0258259	0.0263939	0.0121654	-0.01088	-0.0234946	-0.0167824	-0.0203723	-0.0244548	-0.0113144	-0.00872988		G	GGC	0.0120282	0.0449754	0.0207464	0.0011615	-0.0168607	-0.0228409	-0.0214418	-0.0222457	-0.019299	-0.00620463		G	GGC	0.0133639	0.0285067	0.0707294	0.0456214	0.0255476	0.00021573	-0.0188733	-0.0132026	-0.0106196	-0.0198642		G	GGC	0.031473	0.00173695	0.00915837	0.0520209	0.02173	0.00396325	-0.010511	-0.0155612	-0.010337
G	GGT	0.0249518	0.043386	0.00834361	-0.0164138	-0.0191848	-0.0161208	-0.0145347	-0.025034	-0.0101029	-0.0116213		G	GGT	0.0116239	0.046114	0.0211276	-0.00707574	-0.00604795	-0.0249277	-0.0172113	-0.0162737	-0.0164076	-0.00910779		G	GGT	0.0113288	0.0153942	0.0782943	0.0400032	0.0247675	-0.00265338	-0.0156055	-0.0153033	-0.00968571	-0.0206705		G	GGT	0.0183946	0.0133462	0.00970261	0.0604557	0.0262307	8.4888e-05	-0.0129168	-0.0175951	-0.0157566
G	GGA	0.0304431	0.0487466	0.00353904	-0.0119809	-0.0260778	-0.0146818	-0.0141032	-0.0246438	-0.0145662	-0.00856949		G	GGA	0.00837099	0.0541894	0.00543844	0.00146107	-0.025214	-0.0279311	-0.0227464	-0.0149646	-0.0169002	-0.00850321		G	GGA	0.00596498	0.0223865	0.11304	0.0481866	0.0219437	-0.0141356	-0.0199857	-0.0162145	-0.0169643	-0.00508541		G	GGA	0.0162424	0.00700403	0.00988614	0.065783	0.0482775	0.00823724	-0.013819	-0.0187979	-0.0174943
G	GGG	0.0276386	0.030793	0.0111052	-0.0116165	-0.0216535	-0.0155532	-0.0175607	-0.0174664	-0.004265	-0.00896265		G	GGG	0.0130364	0.0318331	0.0222941	0.00531795	-0.0151885	-0.0203938	-0.0156556	-0.0207033	-0.0189092	-0.00222891		G	GGG	0.00930055	0.0272155	0.0824897	0.0357911	0.00113327	-0.0114263	-0.0142887	-0.0155634	-0.00941323	-0.011678		G	GGG	0.0221066	0.00278269	0.0103308	0.0483354	0.0177559	0.0072452	-0.0206799	-0.014116	-0.0127251
[truncated: 12 more columns]

## Sheet: P-value for codon heatmap
P-value for shuffled datasets exceeding experimental data of stop efficiency at the corresponging triplet in the -2nd position while mRNA codon with specified index number is located in the P-site													P-value for shuffled datasets exceeding experimental data of stop efficiency at the corresponging triplet in the E-site while mRNA codon with specified index number is located in the P-site													P-value for shuffled datasets exceeding experimental data of stop efficiency at the corresponging triplet in the P-site while mRNA codon with specified index number is located in the P-site													P-value for shuffled datasets exceeding experimental data of stop efficiency at the corresponging triplet in the A-site while mRNA codon with specified index number is located in the P-site
-2		Index number of mRNA codon located in the P-site											E		Index number of mRNA codon located in the P-site											P		Index number of mRNA codon located in the P-site											A		Index number of mRNA codon located in the P-site
		4	5	6	7	8	9	10	11	12	13				3	4	5	6	7	8	9	10	11	12				2	3	4	5	6	7	8	9	10	11				1	2	3	4	5	6	7	8	9
P	CCC	1	1	0.880359	0.0338983	0.0119641	0.107677	0.0329013	0	0.989033	0.438684		P	CCC	1	1	1	1	0.999003	1	1	1	1	0.999003		P	CCC	0.997009	1	1	1	1	1	1	1	1	1		P	CCC	0.108674	0.982054	1	1	1	0.884347	1	1	1
P	CCT	0.399801	1	0.36989	0.168495	0.0448654	0.00997009	0.0767697	0	0.5334	0.405783		P	CCT	0.810568	1	0.999003	0.998006	0.997009	1	0.999003	1	1	0.958126		P	CCT	0.856431	1	0.972084	1	1	1	1	1	1	1		P	CCT	0.491525	0.00398804	0.868395	0.928215	0.997009	0.735793	0.968096	1	0.999003
P	CCA	0	0.962114	0.504487	0.0727817	0	0.00697906	0.000997009	0	0.161515	0.123629		P	CCA	0.274177	0.997009	0.995015	0.941176	0.999003	1	1	1	0.995015	0.0149551		P	CCA	0.656032	0.999003	0	1	0.998006	1	1	1	0.999003	1		P	CCA	0.915254	0.0129611	0.279163	0.505484	0.815553	0.0388833	0.905284	0.720837	0.998006
P	CCG	0.584247	1	0.99003	0.0109671	0	0.0458624	0	0	0.765703	0.94317		P	CCG	1	1	1	0.991027	0.994018	1	1	1	1	0.999003		P	CCG	0.509472	1	0.0618146	1	1	1	1	1	1	1		P	CCG	0.185444	0.411765	1	1	1	1	0.962114	0.995015	0.983051
L	CTC	0.998006	0.6999	0.269192	0.246261	0.479561	0.0558325	0.891326	0.524427	0.95015	0.639083		L	CTC	0.924227	0.996012	0.565304	0.201396	0.708873	0.787637	0.407777	0.484546	0	0.928215		L	CTC	0.535394	0.762712	1	0.981057	0.959123	0.485543	0.517448	0.252243	0.910269	1		L	CTC	0.890329	0.992024	1	1	0.403789	0.361914	0.0448654	0.888335	0.551346
L	CTT	0.00299103	0.440678	0.783649	0.935194	0.659023	0.331007	0.204387	0.462612	0.501496	0.929212		L	CTT	0.40678	0.0558325	0.0757727	0.92323	0.254237	0.910269	0.345962	0.305085	0	0.525424		L	CTT	0.64008	0.422732	0.986042	0.995015	0.759721	0.96012	0.668993	0.0329013	0.187438	0.997009		L	CTT	0.862413	0.909272	0.998006	0.738784	0.0997009	0.89332	0.940179	0.614158	0.987039
L	CTA	0.266201	0.355932	0.830508	0.0508475	0.495513	0.227318	0.538385	0.00598205	0.352941	0.912263		L	CTA	0.00897308	0.000997009	0.415753	0.5334	0.000997009	0.0498504	0.140578	0.00997009	0	0.727817		L	CTA	0.962114	0.0498504	0.937188	0.809571	0.71984	0.895314	0.602193	0.306082	0.0917248	0.0608175		L	CTA	0.892323	0.881356	0	0.291127	1	1	1	1	1
L	CTG	0.192423	0	0.860419	0.29013	0.114656	0.246261	0.225324	0.000997009	0.0508475	0.997009		L	CTG	0.417747	0	0.274177	0.487537	0.0628116	0.230309	0.683948	0.104686	0	0.155533		L	CTG	0.0488534	0.451645	0	0.228315	0.507478	0.128614	0.279163	0.129611	0.398804	0.949153		L	CTG	0.924227	1	0.998006	0.971087	0.0927218	0.171486	0.836491	0.139581	0.100698
H	CAC	0	0.606181	0.246261	0.604187	0.911266	0.795613	0.600199	0.902293	0.25324	0.201396		H	CAC	0.738784	0.00299103	0	0.322034	0.316052	0.453639	0.0329013	0.256231	0.849452	0.537388		H	CAC	0	0	0.000997009	0.642074	0.197408	0.40678	0.65005	0.163509	0.244267	0.894317		H	CAC	0.993021	1	0.999003	0.0299103	0.0358923	0.0159521	0.162512	0.168495	0.48654
H	CAT	0	0.00897308	0.975075	0.199402	0.954138	0.138584	0.964108	0.992024	0.768694	0.352941		H	CAT	0.354935	0	0	0.867398	0.710867	0.316052	0.128614	0.0777667	0.917248	0.218345		H	CAT	0.693918	0	0	0.856431	0.604187	0.356929	0.520439	0.578265	0.0159521	0.643071		H	CAT	1	1	0.977069	0	0.403789	0.894317	0.580259	0.241276	0.447657
Q	CAA	0.0159521	0.00797607	0.134596	0.946162	0.728814	0.549352	0.99003	0.683948	0.555334	0.999003		Q	CAA	0.00199402	0	0	0.931206	0.244267	0.591226	0.0179462	0.0598205	0.0269192	0.947159		Q	CAA	0.00299103	0.26321	0.00199402	0.13659	0.195414	0.852443	0.197408	0.225324	0.314058	0.0149551		Q	CAA	0.985045	0.969093	0.185444	0	0.00299103	0.179462	0.50349	0.0997009	0.00797607
Q	CAG	0.451645	0	0.00997009	0.220339	0.519442	0.657029	0.884347	0.87338	0.00398804	0.697906		Q	CAG	0.00398804	0	0.000997009	0.963111	0.915254	0.775673	0.0358923	0.00598205	0.0797607	0.394816		Q	CAG	0.160518	0.764706	0.277168	0.807577	0.799601	0.560319	0.225324	0.208375	0.251246	0.0109671		Q	CAG	0.659023	0.981057	0.340977	0	0.0528415	0.489531	0.104686	0.0608175	0.0927218
R	CGC	0.00299103	1	0.662014	0.996012	1	1	0.964108	1	0.994018	0.35992		R	CGC	0.00299103	0.112662	0.978066	0.932203	0.0927218	0.209372	0.451645	0.714855	0.998006	1		R	CGC	0.946162	1	1	0.581256	0.0299103	0.00498504	0.368893	0.413759	0.648056	0.837488		R	CGC	0.102692	0.986042	0.449651	1	0.95015	0.677966	0.309073	0.00498504	0
R	CGT	0.0378863	0.768694	0.850449	0.981057	1	0.96012	0.696909	0.998006	0.958126	0.581256		R	CGT	0	0	0.621137	0.895314	0.211366	0.303091	0.25324	0.442672	0.999003	0.997009		R	CGT	0.772682	1	1	0.0169492	0.0628116	0.135593	0.500499	0.424726	0.444666	0.805583		R	CGT	0.127617	0.998006	0.00199402	0.984048	0.9332	0.458624	0.0129611	0.159521	0.0408774
R	CGA	0.1665	0.920239	1	0.535394	0.999003	0.942173	0.775673	0.851446	0.307079	0.0478564		R	CGA	0.00299103	0.112662	1	0.983051	0.926221	0.447657	0.1665	0.697906	0.949153	0.782652		R	CGA	0.485543	0	1	1	0.998006	0.979063	0.912263	0.716849	0.946162	1		R	CGA	0.954138	0.323031	0	0.00199402	0.00398804	0.78664	0.847458	0.0209372	0.377866
R	CGG	0.0448654	0.866401	0.912263	0.48654	0.9332	0.931206	0.149551	0.999003	0.71984	0.98006		R	CGG	0.159521	0.178465	0.999003	0.400798	0.0398804	0.00697906	0.118644	0.00498504	0.976072	0.0897308		R	CGG	0.577268	0.995015	1	0.529412	0.0807577	0.1665	0.0189432	0.00398804	0.29013	0.268195		R	CGG	0.00498504	0.908275	0	1	0.941176	0.451645	0.501496	0.00199402	0
S	TCC	1	1	0.493519	0.11665	0.878365	0.750748	0.995015	1	0.495513	0.491525		S	TCC	1	1	0.997009	0.985045	0.560319	0.968096	1	1	1	0.452642		S	TCC	0.210369	0.998006	1	1	0.800598	0.0747757	0.761715	0.977069	0.812562	0.99003		S	TCC	0.279163	0.882353	1	1	0.864407	0.26321	0.0179462	0.504487	0.584247
S	TCT	0.953141	0.702891	0.256231	0.458624	0.599202	0.437687	0.316052	0.994018	0.959123	0.204387		S	TCT	1	1	0.959123	0.564307	0.599202	0.902293	0.00398804	0.951147	0.846461	0.686939		S	TCT	0.0109671	0.550349	0.235294	0.344965	0.40678	0.238285	0.307079	0.267198	0.842473	0.509472		S	TCT	0.609172	0.942173	0.999003	0.683948	0.468594	0.341974	0.00498504	0.821535	0.313061
S	TCA	0.788634	0.0867398	0.449651	0.835494	0.924227	0.567298	0.714855	0.788634	0.0538385	0.24327		S	TCA	1	0.180459	0.0967099	0.70987	0.696909	0.489531	0.97009	0.0428714	0.394816	0.897308		S	TCA	0.0927218	0.0179462	0	0.000997009	0.700897	0.347956	0.473579	0.753739	0.607178	0.2333		S	TCA	0.0727817	0.545364	0.99003	0.65005	0.821535	0.174477	0.647059	0.747757	0.489531
S	TCG	0.999003	0.608175	0.0229312	0.890329	0.998006	0.0787637	0.698903	0.878365	0.178465	0.393819		S	TCG	0.998006	1	0.904287	0.983051	0.971087	0.399801	0.279163	0.822532	0.549352	0.972084		S	TCG	0.526421	0.32004	0.996012	0.925224	0.823529	0.506481	0.0448654	0.622134	0.528415	0.690927		S	TCG	0	0.0687936	1	0.924227	0.98006	0.371884	0.501496	0.99003	0.839482
F	TTC	0	0.997009	0.576271	0.744766	0.00299103	0.380857	0.671984	0.00697906	0.419741	0.566301		F	TTC	0	0.667996	0	0.109671	0.141575	0.0538385	0.168495	0.230309	0.0568295	0.576271		F	TTC	0.00398804	0	0	0	0.0967099	0.0209372	0.00398804	0	0.404786	0		F	TTC	0.916251	0.998006	1	1	0.0488534	0.397807	0.201396	0.197408	0.103689
F	TTT	0	0.115653	0.651047	0.494516	0.34995	0.900299	0.0917248	0.00299103	0.376869	0.663011		F	TTT	0	0	0.00697906	0.0119641	0.218345	0.000997009	0.0199402	0.602193	0	0.249252		F	TTT	0	0	0	0	0.295115	0.0827517	0.111665	0	0.282154	0.0229312		F	TTT	0.949153	0.986042	1	0.940179	0.455633	0.0418744	0.262213	0.423729	0.942173
L	TTA	0	0	0.693918	0.732802	0.58325	0.0139581	0.177468	0.0727817	0.687936	0.973081		L	TTA	0	0	0.0219342	0.185444	0.0368893	0.18345	0.77667	0.143569	0	0.117647		L	TTA	0	0	0	0	0.0159521	0.118644	0	0.0269192	0.00598205	0.0438684		L	TTA	0.996012	0.978066	0.387836	0.494516	0.585244	0.100698	0.18345	0.839482	0.793619
L	TTG	0	0	0.717846	0.127617	0.400798	0.00797607	0.104686	0.145563	0.561316	0.68993		L	TTG	0	0.0119641	0.302094	0.89332	0.153539	0.00498504	0.337986	0.10668	0	0.0628116		L	TTG	0	0.00598205	0	0.00897308	0.345962	0.431705	0.331007	0.43669	0.101695	0		L	TTG	0.921236	0.991027	0	0.0887338	0.142572	0.659023	0.409771	0.0488534	0.215354
Y	TAC	0.00299103	0.257228	0.124626	0.242273	0.00199402	0.8335	0.325025	0.00498504	0.552343	0.153539		Y	TAC	0.934197	0	0	0.00498504	0.0977069	0.198405	0.838485	0.542373	0.34995	0.99003		Y	TAC	0	0	0	0.0329013	0.140578	0.337986	0.0428714	0.802592	0.0189432	0		Y	TAC	0.732802	0.949153	1	0.404786	0.0219342	0.286142	0.294118	0.831505	0.226321
Y	TAT	0	0.0817547	0.281157	0.206381	0.125623	0.00199402	0.208375	0.14656	0.763709	0.388833		Y	TAT	0.785643	0	0.00897308	0.295115	0.973081	0.110668	0.680957	0.141575	0.0747757	0.329013		Y	TAT	0.000997009	0	0	0.312064	0.00598205	0.998006	0.451645	0.169492	0.0468594	0.323031		Y	TAT	0.939182	0.998006	0.949153	0.0528415	0.15653	0.386839	0.509472	0.974078	0.325025
*	TAA	1	1	0.578265	0.0229312	0.000997009	0.0129611	0.0289133	0.0717846	0.0767697	0.0179462		*	TAA	1	1	0.991027	0.604187	0.0677966	0.00398804	0.0159521	0.0388833	0.0907278	0.0588235		*	TAA	0.989033	1	1	0.999003	0.549352	0.0817547	0.00697906	0.0159521	0.0319043	0.0727817		*	TAA	0.0488534	0	0	0	0.316052	0.911266	0.191426	0.3001	0.946162
*	TAG	1	1	0.586241	0.0289133	0	0.000997009	0.00797607	0.0209372	0.0149551	0.000997009		*	TAG	1	1	1	0.613161	0.0319043	0.000997009	0.000997009	0.00199402	0.0249252	0.00598205		*	TAG	0.992024	1	1	1	0.568295	0.0458624	0.000997009	0.00398804	0.00797607	0.0219342		*	TAG	0.315055	0	0	0	0.0139581	0.998006	1	0	0.969093
C	TGC	0.0358923	0.363908	0	0.854437	0.229312	0.260219	0.317049	0.381854	0.750748	0.114656		C	TGC	0.994018	0.595214	0.37986	0.131605	0.150548	0.117647	0.0229312	0.291127	0.767697	0.265204		C	TGC	0.270189	0.876371	0	0	0	0.202393	0.472582	0.0239282	0.0658026	0		C	TGC	0.485543	1	1	1	0.999003	0.931206	0.665005	0.823529	0.988036
C	TGT	0	0.00398804	0.0119641	0.0418744	0.827517	0.0897308	0.626122	0.0658026	0.374875	0.872383		C	TGT	0.785643	0.207378	0.222333	0.352941	0.0538385	0.00598205	0.231306	0.288136	0.101695	0.0618146		C	TGT	0.555334	0.460618	0	0.000997009	0.191426	0.27318	0.162512	0.235294	0.335992	0.00997009		C	TGT	0.734796	0.966102	1	1	0.992024	0.854437	0.993021	0.983051	0.791625
*	TGA	1	1	0.575274	0.0119641	0	0	0.00797607	0.0229312	0.0129611	0.00398804		*	TGA	1	1	0.998006	0.598205	0.0159521	0	0.000997009	0.00498504	0.0279163	0.0169492		*	TGA	0.999003	1	1	1	0.619143	0.0209372	0	0	0.00697906	0.0279163		*	TGA	0.0418744	0	0	0	0.997009	1	0.995015	1	0.999003
W	TGG	0	0.991027	0.285145	0.24327	0.0259222	0.0119641	0.251246	0.000997009	0.0458624	0.540379		W	TGG	0.992024	0	0.14656	0.0309073	0.0219342	0	0.0867398	0	0.437687	0.0488534		W	TGG	0.670987	0.127617	0.896311	0.984048	0.68993	0.460618	0.492522	0	0.169492	0		W	TGG	0	0.777667	0	0.825523	1	0.524427	0.424726	0.0199402	0.337986
T	ACC	0.000997009	0.592223	0.549352	0.987039	0.846461	0.928215	0.999003	0.999003	0.296112	0.534397		T	ACC	0.958126	0.777667	0.00199402	0	0.380857	0.128614	0.443669	0.652044	0.275174	0.574277		T	ACC	0.635095	0.258225	0.646062	0.646062	0.904287	0.00897308	0.948156	0.0737787	0.642074	0.509472		T	ACC	0.101695	0.441675	1	0.998006	0.242273	0.275174	0.0737787	0.713858	0.355932
T	ACT	0	0.00299103	0.260219	0.619143	0.12662	0.248255	0.955135	0.342971	0.742772	0.661017		T	ACT	0.844467	0.0139581	0	0.00299103	0.834497	0.354935	0.274177	0.309073	0.133599	0.309073		T	ACT	0.998006	0.934197	0.846461	0.819541	0.832502	0.927218	0.90329	0.201396	0.692921	0.313061		T	ACT	0.120638	0.206381	0.644068	0.445663	0.0119641	0.155533	0.0368893	0.601196	0.39681
T	ACA	0	0.100698	0.0608175	0.899302	0.240279	0.85344	0.695912	0.633101	0.346959	0.0179462		T	ACA	0.141575	0	0.0219342	0.605184	0.932203	0.872383	0.744766	0.0189432	0.00697906	0.610169		T	ACA	0.996012	0.00997009	0.22333	0.529412	0.984048	0.958126	0.258225	0.368893	0.00697906	0.0358923		T	ACA	0.0309073	0	0.187438	0.000997009	0.819541	0.911266	0.998006	0.999003	0.995015
T	ACG	0.00199402	0.00797607	0.0119641	0.624128	0.529412	0.378863	0.569292	0.7667	0.246261	0.423729		T	ACG	0.397807	0.271186	0.00797607	0.0348953	0.0558325	0.103689	0.15653	0.125623	0.187438	0.447657		T	ACG	0.889332	0.854437	0.222333	0.162512	0.920239	0.548355	0.104686	0.0458624	0.549352	0		T	ACG	0	0.0179462	0.214357	0.000997009	0.50349	0.799601	0.832502	0.944167	0.94317
I	ATC	0	0	0.668993	0.115653	0.481555	0.780658	0.0189432	0.839482	0.225324	0.958126		I	ATC	0	0	0	0	0.00897308	0	0	0.0378863	0	0.45663		I	ATC	0.131605	0	0	0	0	0.0109671	0.00299103	0.20339	0.0677966	0		I	ATC	0.987039	0.952144	0.999003	0.949153	0.00199402	0.409771	0.400798	0.177468	0.0428714
I	ATT	0.00398804	0.0229312	0.504487	0.284148	0.240279	0.0747757	0.0269192	0.286142	0.963111	0.599202		I	ATT	0	0	0.0119641	0	0.0358923	0	0.222333	0.00299103	0	0.0348953		I	ATT	0.258225	0.00598205	0	0	0.00199402	0.0478564	0	0.00199402	0.13659	0.00398804		I	ATT	1	0.98006	0.856431	0.00199402	0	0.749751	0.137587	0.812562	0.13659
I	ATA	0	0.221336	0.993021	0.621137	0	0.00199402	0	0.647059	0.0757727	0.794616		I	ATA	0	0	0.0259222	0.817547	0.0987039	0	0	0.0149551	0	0.805583		I	ATA	0	0	0	0.00498504	0.00299103	0.0388833	0.000997009	0.0109671	0.00199402	0		I	ATA	1	0.983051	0.000997009	0	0.772682	0.579262	0.866401	0.94317	0.390828
M	ATG	0.000997009	0	0.148554	0.0109671	0.261216	0.00598205	0.497507	0	0.546361	0.867398		M	ATG	0.392822	0	0	0.0189432	0.319043	0.0737787	0	0.208375	0.000997009	0.327019		M	ATG	0.114656	0.309073	0	0	0.0608175	0.437687	0.0777667	0.151545	0.00199402	0.000997009		M	ATG	0.987039	1	0.777667	0.0977069	0.562313	0.0388833	0.0867398	0.500499	0.415753
N	AAC	0.288136	0.000997009	0.830508	0.697906	0.995015	0.917248	0.121635	0.984048	0.370887	0.460618		N	AAC	0.00997009	0.1665	0.229312	0.274177	0.437687	0.431705	0.758724	0.554337	0.0159521	0.589232		N	AAC	0.177468	0	0	0.18345	0.839482	0.311067	0.176471	0.0269192	0.948156	0.817547		N	AAC	0.755733	0.589232	0.0149551	0	0	0.0448654	0.493519	0.239282	0.472582
N	AAT	0.483549	0	0.765703	0.623131	0.823529	0.948156	0.338983	0.558325	0.968096	0.972084		N	AAT	0.237288	0.0787637	0.108674	0.986042	0.357926	0.351944	0.254237	0.0408774	0.460618	0.518445		N	AAT	0.112662	0.799601	0	0.301097	0.951147	0.948156	0.219342	0.0588235	0.0428714	0.0498504		N	AAT	0.811565	0	0	0	0.611167	0.47657	0.730808	0.464606	0.725823
K	AAA	0	0.0957129	0.991027	0.820538	0.750748	0.922233	0.568295	0.929212	0.0967099	0.611167		K	AAA	0	0	1	0.772682	0.99003	0.612164	0.0149551	0.0797607	0.44666	0.0239282		K	AAA	0.00199402	0	1	0.868395	0.346959	0.378863	0.0767697	0.885344	0.608175	0.67996		K	AAA	1	0.000997009	0	0	0	0.0618146	0.192423	0.00697906	0.0917248
K	AAG	0.000997009	0.0199402	1	0.958126	0.84347	0.930209	0.540379	0.901296	0.410768	0.875374		K	AAG	0	0.478564	1	0.882353	0.391825	0.447657	0.569292	0.729811	0.192423	0.646062		K	AAG	0.445663	0.39681	1	0.996012	0.972084	0.186441	0.705882	0.176471	0.377866	0.992024		K	AAG	0.999003	0	0	0	0	0.0837488	0.727817	0.0309073	0
S	AGC	0.919242	0.708873	0.360917	0.639083	0.508475	0.993021	0.864407	0.998006	0.493519	0.606181		S	AGC	0.985045	0.985045	0.590229	0.762712	0.939182	0.80658	0.588235	0.0398804	0.743769	0.0967099		S	AGC	0.74676	0.0727817	0.968096	0.955135	0.985045	0.154536	0.501496	0.542373	0.430708	0.985045		S	AGC	0.0648056	0.73679	0.965105	0.804586	0.144566	0.0608175	0.0269192	0.237288	0.357926
S	AGT	1	0.469591	0.208375	0.337986	0.195414	0.341974	0.498504	0.241276	0.18345	0.684945		S	AGT	1	0.992024	0.641077	0.529412	0.334995	0.194417	0.0608175	0.257228	0.538385	0.0867398		S	AGT	0.904287	0.665005	0.993021	1	0.647059	0.820538	0.198405	0.618146	0.104686	0.532403		S	AGT	0	0	0.0348953	0	0.772682	1	0.999003	1	0.983051
R	AGA	0	0.0588235	1	0.934197	0.597208	0.717846	0.483549	0.666999	0.813559	0.739781		R	AGA	0	0	0.952144	0.854437	0.509472	0.0388833	0.0847458	0.0239282	0.00897308	0.642074		R	AGA	1	0.994018	1	0.986042	0.519442	0.815553	0.493519	0.0747757	0.618146	0.59322		R	AGA	0.993021	0	0	0	0.0269192	0.939182	0.897308	0.946162	0.965105
R	AGG	0.225324	0.879362	0.900299	0.983051	0.948156	0.949153	0.64008	0.972084	0.209372	0.275174		R	AGG	0	0	0.648056	0.312064	0.467597	0.21336	0	0.111665	0.0528415	0.734796		R	AGG	0.967099	1	0.999003	0.886341	0.830508	0.130608	0.00797607	0.00598205	0.392822	0		R	AGG	0.437687	0.00299103	0	0	0.319043	0.953141	0.460618	0.129611	0.00797607
A	GCC	1	0.993021	0.410768	0.735793	0.937188	0.997009	0.991027	0.998006	0.898305	0.744766		A	GCC	1	1	0.67996	0.0249252	0.922233	0.98006	0.814556	0.95015	1	0.218345		A	GCC	0.598205	1	0.597208	0.00299103	0.889332	0.122632	0.311067	0.286142	0.119641	0.000997009		A	GCC	0	0.44666	1	1	0.927218	0.580259	0.671984	0.395813	0.902293
A	GCT	1	0.00897308	0.455633	0.0448654	0.848455	0.979063	0.696909	0.963111	0.752742	0.631107		A	GCT	0.998006	0.610169	0.244267	0.0638086	0.104686	0.986042	0.425723	0.973081	0.992024	0.773679		A	GCT	0.0299103	0.134596	0.0468594	0.0149551	0.837488	0.451645	0.00299103	0.0558325	0.0927218	0.541376		A	GCT	0.113659	0.944167	1	1	0.621137	0.376869	0.182453	0.0697906	0.222333
A	GCA	0.985045	0	0.42672	0.556331	0.838485	0.346959	0.0179462	0.60319	0.241276	0.398804		A	GCA	0.985045	0	0.0329013	0.000997009	0.0867398	0.851446	0.333001	0.00997009	0.858425	0.0737787		A	GCA	0.0239282	0.197408	0	0	0.00299103	0.0737787	0.0638086	0.443669	0.111665	0.389831		A	GCA	0.12662	0.998006	1	1	0.634098	0.128614	0.0199402	0.745763	0.153539
A	GCG	1	0.845464	0.276171	0.0947159	0.515454	0.192423	0.666999	0.976072	0.721834	0.0428714		A	GCG	1	0.988036	0.368893	0.0737787	0.827517	0.861416	0.958126	0.469591	1	0.811565		A	GCG	0.712861	0.917248	0.519442	0.0139581	0.0269192	0.522433	0.666002	0.397807	0.764706	0.00199402		A	GCG	0	0.353938	1	1	0.995015	0.94317	0.0368893	0.5334	0.360917
V	GTC	0.132602	0.326022	0.182453	0.922233	0.0757727	0.104686	0.860419	0.0618146	1	0.67996		V	GTC	0	0	0	0	0.0358923	0	0	0	0	0.101695		V	GTC	0.771685	0.72682	0.368893	0	0	0.0638086	0.450648	0.00199402	0.773679	0.000997009		V	GTC	0.94317	1	1	1	0.163509	0.00997009	0.12662	0.167498	0.0209372
V	GTT	0.00199402	0.0109671	0.489531	0.131605	0.555334	0.815553	0.00498504	0.560319	0.775673	0.500499		V	GTT	0	0	0	0	0.0408774	0.105683	0.00398804	0.0927218	0.0159521	0.97009		V	GTT	0.989033	0.978066	0.0159521	0	0.00598205	0.0717846	0.00598205	0.0618146	0.0648056	0.474576		V	GTT	0.975075	0.936191	1	0.975075	0.110668	0.269192	0.421735	0.198405	0.138584
V	GTA	0	0.39681	0.0737787	0.0588235	0.000997009	0.520439	0.0458624	0.443669	0.0448654	0.642074		V	GTA	0	0	0	0	0.0179462	0.0179462	0	0.00199402	0	0.127617		V	GTA	0.942173	0.00598205	0.000997009	0	0.00797607	0.0279163	0.0249252	0.0219342	0.122632	0.0887338		V	GTA	1	0.954138	1	0.987039	0.111665	0.0777667	0.814556	0.0259222	0.145563
V	GTG	0.165503	0.266201	0.104686	0.823529	0.380857	0.370887	0.971087	0.111665	0.738784	0.822532		V	GTG	0	0.00498504	0	0.0179462	0.0498504	0	0	0	0	0.316052		V	GTG	0.954138	0.548355	0	0.00498504	0.0109671	0.0388833	0.000997009	0.00997009	0.222333	0		V	GTG	1	0.994018	1	0.997009	0.297109	0	0.103689	0.100698	0.00398804
D	GAC	1	0.910269	0.105683	1	0.824526	0.795613	0.698903	0.67996	0.29013	0.131605		D	GAC	1	1	1	1	1	0.845464	0.89332	0.861416	0.972084	0.66999		D	GAC	0.00598205	0.692921	1	0.996012	0.448654	0.147557	0.0648056	0.909272	0.526421	0.981057		D	GAC	0	0.244267	0.0149551	0	0	0.0398804	0.269192	0.0129611	0.0338983
D	GAT	1	0.987039	0.959123	0.981057	0.176471	0.900299	0.518445	0.625125	0	0.0967099		D	GAT	0.82652	0.801595	0.929212	0.999003	0.33998	0.641077	0.501496	0.619143	0.512463	0.921236		D	GAT	0.0608175	0.789631	0.998006	0.997009	0.597208	0.780658	0.578265	0.0319043	0.0279163	0.985045		D	GAT	0.0618146	0	0	0	0	0.404786	0.839482	0.0797607	0.627119
E	GAA	0.929212	0.413759	0.906281	0.860419	0.216351	0.144566	0.287139	0.54337	0.612164	0.897308		E	GAA	0.268195	0.0249252	0.953141	0.775673	0.647059	0.971087	0.695912	0.343968	0.735793	0.160518		E	GAA	0.658026	0.525424	1	0.97009	0.793619	0.0927218	0.341974	0.402792	0.482552	0.328016		E	GAA	0.102692	0.0707876	0	0	0	0.000997009	0	0.199402	0
E	GAG	1	0.836491	0.98006	0.861416	0.619143	0.892323	0.596211	0.759721	0.195414	0.589232		E	GAG	0.781655	0.999003	1	0.982054	0.802592	0.664008	0.548355	0.860419	0.880359	0.00697906		E	GAG	0.998006	1	1	1	0.901296	0.0279163	0.20339	0.319043	0.0987039	0.115653		E	GAG	0	0	0	0	0	0.00797607	0.0358923	0	0.157527
G	GGC	1	0.676969	0	0.142572	0.993021	0.818544	0.979063	1	0.314058	0.0299103		G	GGC	1	1	0.967099	0.598205	0.629113	0.971087	0.998006	0.994018	0.925224	0.00199402		G	GGC	0.976072	0.998006	0.995015	0	0	0	0.58325	0.211366	0.0259222	0.938185		G	GGC	0.0937188	1	1	1	0.949153	0.283151	0.0847458	0.0917248	0.00997009
G	GGT	1	0.00299103	0.0957129	0.637089	0.667996	0.670987	0.408774	0.991027	0.269192	0.412762		G	GGT	1	1	0.901296	0.962114	0.0528415	0.97009	0.757727	0.598205	0.627119	0.12662		G	GGT	0.985045	1	0.744766	0.0179462	0	0.0119641	0.179462	0.526421	0.0837488	0.895314		G	GGT	0.958126	0.932203	1	0.999003	0.673978	0.631107	0.3001	0.341974	0.562313
G	GGA	1	0	0.40678	0.279163	0.99003	0.527418	0.44666	0.971087	0.696909	0.140578		G	GGA	1	0.999003	1	0.538385	0.956132	1	0.987039	0.469591	0.639083	0.179462		G	GGA	0.987039	0.999003	0	0	0	0.386839	0.675972	0.642074	0.607178	0.0388833		G	GGA	0.947159	0.986042	1	0.993021	0	0.110668	0.360917	0.505484	0.715852
G	GGG	1	0.209372	0.0119641	0.198405	0.934197	0.636092	0.747757	0.772682	0.00299103	0.0398804		G	GGG	1	1	0.898305	0.180459	0.501496	0.809571	0.614158	0.965105	0.867398	0		G	GGG	0.999003	0.999003	0.488534	0.0438684	0.584247	0.150548	0.0817547	0.595214	0.0269192	0.191426		G	GGG	0.834497	1	1	1	0.992024	0.0997009	0.85344	0.0378863	0.155533
[truncated: 12 more columns]

## Sheet: Heatmap for codons in sites
Stop efficiency at the corresponging triplet while located in the ribosome sites								P-values for shuffled datasets exceeding experimental data of stop efficiency at the corresponging triplet while located in the ribosome sites
		Ribosome sites								Ribosome sites
		-2	E	P	A	2				-2	E	P	A	2
P	CCC	-0.00246747	-0.0119113	-0.0147823	0.00280758	0.00856673		P	CCC	1	1	1	1	1
P	CCT	0.00397158	-0.00849275	-0.00806739	0.00737222	0.0153316		P	CCT	0.120638	1	1	1	0.684945
P	CCA	0.010764	-0.00336842	-0.00386376	0.0139354	0.017185		P	CCA	0	1	1	0.58325	0.902293
P	CCG	0.00415381	-0.00546401	-0.00261476	0.0046242	0.0131783		P	CCG	0.0378863	1	1	1	1
L	CTC	-0.00244273	0.00336089	0.00245928	0.00764814	0.0164987		L	CTC	0.951147	0.789631	1	1	0.540379
L	CTT	0.00283532	0.0109322	0.00243193	0.00520611	0.0180282		L	CTT	0.283151	0.00897308	0.996012	1	0.115653
L	CTA	0.0060555	0.0180017	0.0055632	-0.00324572	0.021953		L	CTA	0.0707876	0	0.794616	1	0.0987039
L	CTG	0.00638266	0.0159524	0.0156911	0.00922102	0.016925		L	CTG	0.000997009	0	0	0.998006	0.403789
H	CAC	0.00465505	0.00912874	0.0188992	0.0134542	0.0217379		H	CAC	0	0.000997009	0	0.67996	0
H	CAT	0.00737913	0.0201649	0.0248972	0.0101374	0.0185589		H	CAT	0.00598205	0	0	0.995015	0.264207
Q	CAA	0.00451716	0.029563	0.0192468	0.0238118	0.0307002		Q	CAA	0.270189	0	0	0	0
Q	CAG	0.00431517	0.0157222	0.0127084	0.0192524	0.0237566		Q	CAG	0.000997009	0	0.209372	0.00199402	0
R	CGC	-0.00351049	0.00463696	0.00691314	0.0123572	0.0167611		R	CGC	1	0.857428	0.996012	0.917248	0.463609
R	CGT	-0.000930075	0.0107927	0.0067963	0.0142001	0.0254054		R	CGT	0.999003	0.0289133	0.978066	0.313061	0
R	CGA	-0.00423193	0.00341435	-0.00375555	0.0278453	0.0267442		R	CGA	0.999003	0.868395	1	0	0
R	CGG	0.000244484	0.00945146	0.00984123	0.018046	0.0214764		R	CGG	0.967099	0.0677966	0.856431	0.00897308	0.00598205
S	TCC	-0.0086522	-0.00749683	0.00104706	0.0066296	0.015114		S	TCC	1	1	1	1	0.741775
S	TCT	0.00127816	-0.000721812	0.0127572	0.0112149	0.0198432		S	TCT	0.964108	1	0.0488534	0.844467	0.0518445
S	TCA	0.00319252	0.00519057	0.0179334	0.0135736	0.0180203		S	TCA	0.706879	0.86341	0	0.810568	0.788634
S	TCG	-0.00180842	-0.00243331	0.00839622	0.0132904	0.0170383		S	TCG	0.982054	1	0.972084	0.885344	0.777667
F	TTC	-0.00170688	0.0106529	0.0396234	0.00527434	0.0171685		F	TTC	0	0	0	1	0.65005
F	TTT	0.0197638	0.0299617	0.0502945	0.0106404	0.0222561		F	TTT	0	0	0	0.997009	0.31007
L	TTA	0.0245287	0.0378802	0.0443538	0.0142725	0.0191769		L	TTA	0	0	0	0.973081	0.79661
L	TTG	0.0119181	0.0196699	0.0240606	0.0203143	0.0197707		L	TTG	0	0	0	0.0797607	0.561316
Y	TAC	0.00601617	0.014729	0.0377642	0.0137265	0.0175504		Y	TAC	0	0	0	0.743769	0.498504
Y	TAT	0.0230928	0.0391643	0.048311	0.010584	0.0190302		Y	TAT	0	0	0	0.99003	0.470588
*	TAA	0	0	0	0.0856937	-0.0148843		*	TAA	1	1	1	0	1
*	TAG	0	0	0	0.0651887	-0.0141476		*	TAG	0.837488	1	1	0	1
C	TGC	0.00252046	0.00503454	0.0240234	-0.000845772	0.017642		C	TGC	0.0109671	0.249252	0	1	0.481555
C	TGT	0.0187984	0.013979	0.0212902	0.00154232	0.0193156		C	TGT	0	0.0169492	0	1	0.248255
*	TGA	0	0	0	0.034204	-0.00357396		*	TGA	1	1	1	0	1
W	TGG	0.00894379	0.0205784	0.0134239	0.0195408	0.0221935		W	TGG	0	0	0.199402	0.0498504	0.0957129
T	ACC	-0.00564451	0.00479024	0.0067961	0.0107218	0.0191783		T	ACC	0.979063	0.0309073	0.55334	0.940179	0.252243
T	ACT	0.0103168	0.0125124	0.000855049	0.0192052	0.0222143		T	ACT	0	0	1	0.00897308	0.0259222
T	ACA	0.0129095	0.0134452	0.00855119	0.0193381	0.0297851		T	ACA	0	0.00797607	0.636092	0.0289133	0.00299103
T	ACG	0.0037386	0.0100221	0.0111615	0.0182488	0.0223727		T	ACG	0.00199402	0.00199402	0.212363	0.00598205	0.0418744
I	ATC	0.0068838	0.0364973	0.0424818	0.0131883	0.0159989		I	ATC	0	0	0	0.922233	0.892323
I	ATT	0.0237257	0.0573553	0.0405877	0.0154415	0.0157656		I	ATT	0.000997009	0	0	0.872383	0.896311
I	ATA	0.032997	0.0610211	0.0486652	0.00880935	0.0221274		I	ATA	0	0	0	1	0.718843
M	ATG	0.0172559	0.0290013	0.0338164	0.0153818	0.022176		M	ATG	0	0	0	0.864407	0.386839
N	AAC	0.000562292	0.0120978	0.0247857	0.0348401	0.0274795		N	AAC	0.516451	0.0169492	0	0	0.00598205
N	AAT	0.0122066	0.025226	0.0301584	0.0406306	0.0248135		N	AAT	0.389831	0.0478564	0	0	0.157527
K	AAA	0.0256083	0.0305023	0.0296456	0.0547409	0.0345591		K	AAA	0	0	0	0	0.00598205
K	AAG	-1.17607e-06	0.00722512	0.00391044	0.0757093	0.026337		K	AAG	0.889332	0.91326	1	0	0.0458624
S	AGC	-0.00645586	-0.00163053	0.00437111	0.0158784	0.0252731		S	AGC	0.998006	0.994018	0.988036	0.131605	0
S	AGT	0.00697236	0.00416747	0.00400709	0.0266663	0.0252096		S	AGT	0.89332	0.997009	1	0	0.0119641
R	AGA	0.011109	0.0249137	-0.000817749	0.044488	0.0270944		R	AGA	0.201396	0	1	0	0.0687936
R	AGG	-0.00288461	0.0141357	0.00756454	0.0356569	0.0230309		R	AGG	0.989033	0	0.918245	0	0.100698
A	GCC	-0.00760858	-0.0018306	0.010053	0.00610408	0.0110941		A	GCC	1	1	0.162512	1	1
A	GCT	-0.00147456	0.00387397	0.0144874	0.00710989	0.0122774		A	GCT	0.99003	0.977069	0.000997009	0.994018	0.97009
A	GCA	0.00320224	0.0117246	0.0216191	0.0090234	0.0146821		A	GCA	0.0937188	0	0	0.998006	0.984048
A	GCG	-0.0030595	0.0015079	0.0114596	0.00967703	0.0125887		A	GCG	1	1	0.111665	0.998006	0.998006
V	GTC	0.000571528	0.026456	0.0175013	0.00832073	0.0103051		V	GTC	0.305085	0	0	1	1
V	GTT	0.0128602	0.0329687	0.0184655	0.00902874	0.0147141		V	GTT	0.00199402	0	0.00299103	0.998006	0.627119
V	GTA	0.0152871	0.0387461	0.0292361	0.00873406	0.0151269		V	GTA	0	0	0	0.999003	0.890329
V	GTG	0.00420566	0.027097	0.0224353	0.0106663	0.0145708		V	GTG	0.245264	0	0	0.992024	0.917248
D	GAC	-0.00951878	-0.00849347	0.00426647	0.0398647	0.0126189		D	GAC	1	1	1	0	0.997009
D	GAT	-0.00319713	0.0094661	0.00969288	0.0395536	0.0138631		D	GAT	1	0.992024	0.982054	0	0.940179
E	GAA	0.000935955	0.0105622	0.00666811	0.0563711	0.0210985		E	GAA	0.900299	0.490528	0.991027	0	0.542373
E	GAG	-0.00749799	0.000808934	-0.00156078	0.0472689	0.0178442		E	GAG	1	1	1	0	0.656032
G	GGC	-0.00507051	-0.00299436	0.0129792	0.00673219	0.0150957		G	GGC	1	1	0.0189432	1	0.817547
G	GGT	-0.0005537	0.000542142	0.0120808	0.00821536	0.0154823		G	GGT	1	1	0.558325	1	0.907278
G	GGA	-0.00273266	-0.00453333	0.0144608	0.0137875	0.0214945		G	GGA	1	1	0.00797607	0.954138	0.365902
G	GGG	-0.000533963	8.68668e-05	0.0116586	0.00653666	0.0149456		G	GGG	1	1	0.759721	1	1

## Sheet: 2D codon heatmap
2-dimensional representation of stalling propensities with the corresponding codons located in the P- and A-sites
P\A		Codons located in the A-site
		CCC	CCT	CCA	CCG	CTC	CTT	CTA	CTG	CAC	CAT	CAA	CAG	CGC	CGT	CGA	CGG	TCC	TCT	TCA	TCG	TTC	TTT	TTA	TTG	TAC	TAT	TAA	TAG	TGC	TGT	TGA	TGG	ACC	ACT	ACA	ACG	ATC	ATT	ATA	ATG	AAC	AAT	AAA	AAG	AGC	AGT	AGA	AGG
P	CCC	-0.0364059	-0.0515834	-0.0306275	-0.0342398	-0.013102	-0.0259497	-0.0444706	-0.00866888	-0.00161743	-0.00330843	-0.0023049	-0.0100973	-0.00406387	-0.00460562	-0.0113929	-0.00539177	-0.00818415	0.00874808	0.00181209	-0.00591065	-0.00245503	0.00373871	0.0109758	-0.0231806	-0.00444867	0.0165772	-0.0713167	-0.00917505	-0.0319116	-0.0153921	-0.0723979	-0.00873399	-0.00107549	-0.00379946	-0.0240869	-0.0060717	-0.00662091	0.000766606	-0.0115584	0.0180676	0.00824179	0.00330138	0.00193202	0.0109299	-0.00416836	0.0171025	-0.00710485	-0.0176371
P	CCT	-0.0288457	-0.0248774	-0.0225927	-0.00867067	0.0068116	-0.0166183	-0.0391013	-0.00597329	0.00676204	0.0211983	0.0584925	-0.000131125	-0.00218797	0.0106477	-0.000707622	-0.000620708	-0.0141577	0.00723066	0.00725417	-0.00826401	-0.00526295	-0.0280335	0.0051018	0.0145747	-0.0408326	-0.0230158	0.0468945	-0.0399603	-0.0327193	-0.0139785	-0.0153159	-0.0199186	-0.00418798	-0.0199253	0.0384844	0.0147028	-0.0128307	0.0167639	0.0340001	0.00388076	0.0218266	-0.00572897	0.0169816	0.0203568	-0.00537389	0.0127516	0.0350101	-0.0121641
P	CCA	-0.0158576	-0.0165706	-0.018522	-0.022403	0.00298447	-0.00887023	-0.01477	0.00958553	0.0197488	-0.00512367	0.010855	0.00755101	-0.00762906	-0.0109016	-0.00702577	-0.0107897	0.000536161	0.0174076	0.0396166	0.0225272	0.0257317	0.0340601	0.0124035	0.0213526	0.00243316	-0.0342681	0.00392531	-0.0193311	-0.0132679	-0.00309523	-0.0652737	0.00505225	-0.0151762	0.00759843	0.00735274	-0.0130089	0.00932805	-0.00587281	0.0293686	0.0353519	-0.00185628	0.0177343	0.0337436	0.0230592	0.0146256	-0.0310522	0.00494266	-0.0199014
P	CCG	-0.0288968	0.00259294	-0.00586634	-0.013703	-0.0151443	-0.0220722	-0.0479796	0.00345544	-0.00117761	0.0123676	0.014828	-0.00271956	0.00558383	-0.000166829	-0.00628923	-0.00186881	0.0107121	0.0114986	0.0103373	0.0170668	0.0145355	-0.000810391	0.019587	0.0125506	0.0262429	-0.0208691	0.00505738	-0.0183849	-0.0116124	-0.00558648	0.00100344	-0.000422386	0.00469843	0.0178753	0.0201387	0.00828989	-0.00594201	0.00571976	0.0351272	0.0380183	0.0539514	0.00287598	0.0119295	-0.00310983	0.0192812	0.00708983	0.0135943	-0.00332736
L	CTC	-0.00942017	-0.0123775	-0.0186854	0.00487506	0.0100555	-0.00525169	-0.0124377	-0.0017107	0.0161249	0.0117167	0.0467775	0.0126568	0.0058764	0.00281212	0.0223123	0.00973515	0.00474152	0.00703035	-0.0130255	-0.00252644	-0.00121307	0.00728289	-0.0162378	-0.00750005	-0.000485008	-0.00521405	0.0884223	0.0899857	-0.000270787	0.00619895	0.0424495	0.00476158	0.0109793	0.0188381	0.0364388	0.0077427	0.00752665	0.0240552	0.0105045	0.00279583	0.0278824	0.00114382	0.0449244	0.0775348	-0.00218667	-0.0545193	-0.0741067	0.0434683
L	CTT	-0.0129061	0.011739	0.00265421	0.0224674	-0.00438349	-0.00167431	-0.0511753	0.00221446	0.021547	0.00091315	0.0493955	0.00449167	-0.00721194	-0.00784988	0.0105133	0.0128118	0.00115847	0.0157509	-0.0408774	-0.0186442	-0.014615	0.00518734	0.0478544	-0.0200261	0.000864358	-0.00521249	0.0844848	0.0600545	0.0214565	-0.0473016	0.0955087	-0.00544285	0.00166478	0.0180382	0.00800775	0.0159869	-0.00716441	0.0155834	0.0883662	-0.0194308	0.0805487	0.0418476	0.0761365	0.111445	-0.00423773	0.005377	-0.00274925	0.0220329
L	CTA	8.21606e-05	0.013731	-0.00333784	0.0150258	-0.00497155	-0.0183646	0.0191822	0.0271079	-0.00765768	-0.0302966	-0.00498078	0.00278484	-0.0193369	-0.00100564	0.0378267	0.00829646	-0.00927097	0.0396153	-0.00397985	-0.0412054	-0.0341942	-0.015335	-0.00873559	-0.00173687	-0.0112491	-0.00673097	0.133476	0.0810536	-0.00344506	-0.0154271	0.00372241	0.0277187	0.0294002	-0.0047365	-0.00658096	0.0260356	0.0343755	-0.0233904	-0.0190359	-0.00355692	0.030131	0.00242241	0.0874171	0.11385	0.0247528	-0.036654	-0.0994309	0.0389493
L	CTG	0.0073056	0.02053	0.026081	0.040692	0.0284495	0.014953	0.034425	0.0420931	0.0335269	0.0121606	0.0708082	0.0383266	0.0243109	0.013175	0.0520429	0.00991618	0.0252616	0.0182854	0.022463	0.0350729	0.00737336	-0.00663209	0.0199534	-0.0227883	-0.0377184	0.00843714	0.0946484	0.0966122	-0.00442679	-0.0189885	0.137506	0.00877224	0.00729051	0.0121961	0.0116739	0.0325961	0.00322644	0.0309389	0.0856676	0.0258259	0.0861037	-0.0100164	0.0628079	0.0768609	0.0162571	-0.0369487	0.00280543	0.00173624
H	CAC	0.00651328	0.024064	0.0334834	0.0160567	0.0126229	0.0175307	0.0552006	-0.0053851	0.0152665	0.0592012	0.0390165	0.050726	0.00816073	0.0229881	0.0110925	0.00919196	0.0139718	0.0147464	-0.00251243	0.0208042	0.00604288	0.022723	0.0172512	0.0136271	0.000648618	0.0183185	0.126868	0.0698301	0.00152656	0.00769106	0.0316644	0.0257506	0.00412755	0.00741037	0.0405428	0.0329211	0.0338368	0.037362	0.0791391	0.0226924	0.0527163	0.0138769	0.0842823	0.182561	0.0212333	0.0319797	0.0946089	0.0484201
H	CAT	0.000740725	0.0088451	0.0361738	0.00341358	0.0221761	0.0231854	0.0170494	0.0369745	0.0341748	0.0343621	0.0788454	0.0721268	0.00287692	-0.000585897	0.0585692	0.0466086	0.00991744	-0.00486907	-0.0051595	0.020717	-0.0137525	0.0451406	0.0592289	0.0493897	0.0416233	-0.00657276	0.196016	0.116966	-0.0142904	0.0204091	0.064074	0.0229037	0.00943755	0.0149696	0.0524192	-0.00025548	0.00842736	0.00616722	0.0395262	0.0399631	0.034341	0.0645792	0.115973	0.197617	-0.00449126	0.0237579	0.0573419	0.0660059
Q	CAA	0.0154633	0.0219821	0.00861028	0.0171394	-0.00520394	-0.00178706	-0.00643909	0.0105228	0.0115822	0.0165885	0.0392646	0.00743518	0.0216114	0.0248491	0.015958	0.040028	0.0222599	-0.00943176	0.0265019	0.0140808	0.0240595	-0.00922372	0.0353181	0.0138582	0.0120451	0.0247175	0.160854	0.108947	0.0113009	0.00583178	0.0404275	0.00881743	0.00183314	0.0128083	0.0258335	0.0152892	0.00809102	-0.00127143	0.0272392	0.0111725	0.0433175	0.0139787	0.0847006	0.0946605	0.00511293	0.0610794	0.0802761	0.0935066
Q	CAG	-0.000473001	-0.0127041	0.0367373	0.00565729	0.0160476	0.0163356	-0.000452486	-0.0030785	0.0241077	0.0175765	0.0302965	0.00306767	0.0249148	0.0269112	0.0106199	0.0282325	0.000182624	-0.00432573	0.0250345	-0.0173352	-0.0232806	-0.0212337	0.0313156	0.0239328	-0.000430359	-0.0109663	0.169832	0.041906	0.000656393	-0.00540901	0.0644991	0.0290817	0.00390368	0.0156219	0.0331271	0.00112342	0.000479697	0.017286	0.0336368	0.00194194	0.029299	0.0538489	0.0685567	0.0556086	-0.0151287	0.0309626	0.158965	0.0608141
R	CGC	0.00780879	0.00599008	0.0115825	0.00401463	0.0102741	0.0231841	-0.0357766	0.00348897	0.00367048	0.0208713	0.0194662	0.0121442	0.0172043	0.0148537	0.0397859	0.018618	0.00207237	0.014992	-0.0107405	0.0112636	0.0156147	0.0108579	0.0602473	0.00604374	0.0057748	-0.0130414	0.0520614	0.0453914	-0.0101903	0.00237422	0.0300973	0.0210825	0.00744574	0.0209252	0.00788911	0.00417293	0.012222	-0.00119773	0.0228748	0.0027357	0.0111402	0.0189262	0.0286146	0.0617478	0.00454734	0.0153137	0.0337039	0.023385
R	CGT	-0.0013121	0.0116626	0.0256548	0.00186286	0.0169971	0.0153425	0.0183909	0.0194773	0.0133231	0.00587775	0.0295455	0.0213801	0.0110503	0.030383	0.0217774	0.0113533	-0.0153707	0.00987531	0.020014	0.0227065	-0.00685955	0.0048015	0.0132336	0.000985914	0.0146234	0.00785215	0.0578746	0.0642407	0.0215664	0.00308029	0.0030408	-0.0037722	-0.0035388	-0.000163506	0.0363364	0.0179023	0.0019398	0.0118311	0.0725075	-0.0213705	-0.00195936	0.00787106	0.112586	0.0250108	0.0346902	0.0191043	0.0948096	0.0296952
R	CGA	-0.00144531	0.0215776	0.0291199	-0.0128781	0.00194332	-0.0240271	-0.0846013	-0.0056331	0.0124089	-0.0402422	0.0103061	-0.00575823	0.013159	-0.000237857	-0.00176799	0.0319208	0.0157352	-0.0011803	-0.026465	0.0214342	0.0120521	7.50434e-05	-0.01133	-0.00754178	-0.0089752	0.0207534	0.0117272	0.0329259	-0.00685392	-0.0289638	0.000784332	-0.00969514	0.00568085	0.0300272	-0.0737408	-0.0255037	0.0188188	-0.00816733	0.0045251	0.0175499	-0.0136511	-0.0657416	0.00884925	0.00775564	0.00665741	-0.116316	0.025618	0.0517842
R	CGG	0.0181755	0.0143907	0.0246527	0.012213	0.0113206	0.00161119	-0.012639	0.0163486	0.0165693	-0.000386728	0.0313161	0.00169856	0.00550196	0.0181733	0.0275519	0.0203018	0.00189981	0.00701986	0.0220179	0.00799514	-0.00519353	0.0146039	0.033652	0.0202426	0.00902789	0.0334785	0.0587742	-0.00132737	-0.00101064	-0.0117891	0.0106954	0.00434564	0.0215917	0.0158674	0.0107592	0.0290138	0.00708756	0.00560138	0.00918231	0.0204069	0.0206626	0.0152511	0.0801634	0.082621	0.00539664	0.00817305	0.0391182	0.0451324
S	TCC	0.00181872	0.00490039	-0.000709305	-0.00910648	0.00534113	0.0360641	-0.0247282	0.000455407	0.0173	0.00683811	0.0112513	0.00616795	-0.00528768	0.019391	-0.000828018	0.00386152	-0.00381056	0.00593064	-0.00980153	0.0106082	-0.0173056	-0.00791272	-0.0108101	0.000548147	0.0322145	0.0400763	-0.0218619	-0.0117077	-0.000164603	-0.0109046	0.0155867	-0.00814727	0.00525495	0.00478663	-0.0147207	0.0252183	0.00266754	0.0250576	-0.01068	0.000292336	0.0111581	0.0387395	0.00165872	0.0276208	0.00471563	-0.00137783	0.0157847	0.0182124
S	TCT	0.010629	0.00171346	-0.0026002	0.0142709	-0.00312211	0.0234291	0.006021	-0.0183002	0.0119822	-0.0116054	-0.0112693	0.024633	0.00573149	0.0435887	0.0441376	0.0101793	0.00203152	0.0162555	0.0160632	0.00954784	0.0064376	0.0102455	-0.040383	0.0183933	0.0170667	0.0130122	0.0707841	0.0874182	0.0243883	-0.00125117	0.0361296	0.0326906	-0.00631377	0.028079	-0.0157421	0.0322133	-0.00909925	0.00336382	0.0324156	-0.00203808	0.0454664	0.150039	0.029881	0.067474	-0.00217613	0.0117629	0.0828516	0.0679749
S	TCA	0.00971142	0.0115497	0.0385819	-0.00768221	0.0358112	-0.00512125	-0.0193132	0.014285	0.0390662	-0.00354144	0.0702805	0.0452821	0.031038	0.0243124	0.0314338	0.0329947	0.00650794	0.00613071	-0.0161587	-0.029928	-0.0187777	0.0325964	0.0219212	0.0310546	0.00112096	0.0364666	0.0217369	0.0618196	0.0128462	-0.00494994	0.0454341	0.0742933	0.00944759	0.0204978	0.029232	0.0061954	0.0237155	0.0311701	0.0367098	0.0231567	0.0191252	0.139989	0.0528021	0.115104	0.0178821	0.010627	0.0191506	0.0254831
S	TCG	0.00625698	0.0201572	0.0201476	0.00769895	0.00158983	0.0159677	-0.0171683	0.00515256	0.00791569	0.0110607	-0.00363509	0.00613707	0.0226925	0.00887056	0.0069679	0.00177255	-0.0155678	-0.00195952	0.051198	0.00203085	0.0150782	0.0239218	0.0349102	-0.00994038	0.0149557	-0.00310139	-0.0339067	0.0148733	0.00971197	-0.0201764	-0.0384847	0.0105177	0.0247285	0.0154533	-0.0064068	0.0180352	0.0254297	0.021063	-0.0159879	0.0298315	0.0476394	0.0141283	0.0314462	0.0557913	0.0149323	0.0209958	0.0751678	0.0621833
F	TTC	0.0299271	0.0427827	0.0515043	-0.00245005	0.0274198	0.049885	0.043492	-0.00402694	0.0434334	0.0173332	0.0357533	0.0455841	0.0442774	0.0510325	0.0786421	0.0469687	0.0448198	0.0400113	-0.0226804	0.0438088	0.0165954	0.0393686	0.0501517	0.114233	0.0621445	0.0410557	0.29419	0.113261	0.0107542	-0.0122174	0.103509	0.088677	0.0401221	0.04162	0.0211136	0.0221421	0.0376074	0.0385113	0.10366	0.0499401	0.0513361	0.0605186	0.15332	0.124795	0.0205197	0.0162901	0.166316	0.12267
F	TTT	0.0480979	0.050004	0.0307647	0.011845	0.0111849	0.0410229	0.0622692	0.0717293	0.0607997	0.0461965	0.0135595	0.105514	0.0451796	0.0410716	0.091786	0.051833	0.0255942	0.00897542	0.0137735	0.0171619	0.0444298	-0.00108237	0.038078	0.0764311	0.0578733	0.0174811	0.2435	0.276454	0.0353816	0.028576	0.179911	0.0806534	0.0237758	0.0319652	0.02468	0.00598684	0.0238924	0.025102	0.0936226	0.0275031	0.0574675	0.115279	0.0865393	0.275948	0.0258714	0.0745602	0.0726826	0.0889787
L	TTA	0.0203852	0.0504701	0.0158198	0.0294251	0.0552281	0.0121499	0.0629177	0.0857849	0.0576238	0.066571	0.105035	0.0754394	-0.012677	0.0192762	0.0529304	0.0942249	0.00488899	0.00755153	0.0825232	0.00667806	-0.011672	0.0254684	0.0935888	0.0623838	-0.0171223	-0.0516679	0.158075	0.223212	-0.0192968	-0.000869047	0.0905987	0.0434798	0.047787	0.0199344	0.0521091	0.0853754	0.0552826	0.0391869	-0.0388715	0.0613372	0.00423578	0.0473594	0.100702	0.227649	-0.0108122	0.0453184	0.130296	0.128138
L	TTG	0.0110531	0.0132894	0.0255504	0.0130113	0.0367034	-0.0256221	-0.0397613	0.036674	0.0263435	-0.00159697	0.0530167	0.00941205	0.0178406	0.0228564	0.060722	0.0173593	-0.0110717	0.0171963	0.0266858	0.0233748	0.00968846	0.010522	-0.0417207	0.014591	-0.026125	0.0379748	0.254853	0.16111	0.0132921	-0.0197275	0.1075	0.0662968	0.00812433	0.00491812	0.0259335	0.0328028	0.0700417	0.0445407	0.0171408	0.040374	0.0258832	0.0810817	0.132114	0.0754274	0.0380162	0.0436791	0.0842559	0.0398443
Y	TAC	0.0159234	0.0416927	0.0315689	0.0126928	0.0160528	0.0303247	-0.0387387	0.0229288	0.0620443	0.0496734	0.03698	0.0487422	-0.0110925	0.0124827	0.0308406	0.0486108	0.0110437	0.00580609	-0.00775878	0.0272399	0.00754761	0.0815215	0.0683061	0.0814336	0.0766169	0.0775351	0.180062	0.119894	-0.00346871	0.0849738	0.126265	0.0779749	-0.00132492	0.0723984	0.0279342	0.0363718	0.0564485	0.0954079	-0.00363955	0.0450862	0.131878	0.226554	0.111511	0.175197	0.0510685	0.0771262	0.127679	0.10812
Y	TAT	0.0189402	0.0446207	0.0742415	0.0300914	0.0453871	0.0294963	0.00191049	-0.00996695	0.0504143	0.0409326	0.0694122	0.125133	0.0301938	0.0176962	0.026856	0.0568554	0.0177093	0.0103195	0.0152977	0.00604253	0.0320991	0.0318518	0.0682063	0.0994666	0.0332172	0.00578289	0.184189	0.263132	-0.0225021	0.0146551	0.166304	0.105977	0.0162084	-0.0230075	0.0679223	0.0492156	0.0931583	0.00787012	0.0779094	0.0238721	0.139887	0.144213	0.13801	0.250384	0.0311641	0.0249421	0.0905342	0.133947
*	TAA	N/A	N/A	N/A	N/A	N/A	N/A	N/A	N/A	N/A	N/A	N/A	N/A	N/A	N/A	N/A	N/A	N/A	N/A	N/A	N/A	N/A	N/A	N/A	N/A	N/A	N/A	N/A	N/A	N/A	N/A	N/A	N/A	N/A	N/A	N/A	N/A	N/A	N/A	N/A	N/A	N/A	N/A	N/A	N/A	N/A	N/A	N/A	N/A
*	TAG	N/A	N/A	N/A	N/A	N/A	N/A	N/A	N/A	N/A	N/A	N/A	N/A	N/A	N/A	N/A	N/A	N/A	N/A	N/A	N/A	N/A	N/A	N/A	N/A	N/A	N/A	N/A	N/A	N/A	N/A	N/A	N/A	N/A	N/A	N/A	N/A	N/A	N/A	N/A	N/A	N/A	N/A	N/A	N/A	N/A	N/A	N/A	N/A
C	TGC	0.0212781	0.0243987	0.033543	0.013922	0.0108799	-0.0124594	0.0230208	0.0255906	0.0244477	0.0430587	0.00299679	0.0250256	0.0194541	0.0331246	0.0597873	0.0376343	0.00155604	0.035463	0.0435214	0.0303632	0.0171323	0.0292952	-0.000190803	0.0594937	0.000729145	0.0383931	0.100438	0.150761	0.00720538	0.0179037	0.0657561	0.0368376	0.0270738	-0.00673492	0.0513848	0.00586606	0.0284866	0.010663	0.0096747	0.0532548	0.0769375	0.00545262	0.08256	0.092534	0.0316361	0.0333944	0.122262	0.0894239
C	TGT	-0.0124322	-0.00255682	0.0511719	0.0225715	0.00589851	0.0293651	0.0807631	0.0308469	0.040009	0.0312414	-0.0128369	0.041989	0.0162381	0.0138854	0.0376313	0.0251564	0.0236607	0.0112951	0.00654052	0.0149064	0.0190014	-0.0120681	-0.0366927	0.0113288	0.0426452	-0.0269918	0.0919845	0.167539	0.010038	0.0160847	0.0776222	0.00587844	-0.00439365	0.0401816	0.0454205	-0.0273162	0.0442901	0.0453596	-0.00767173	0.0521876	0.0177221	0.0243249	0.151962	0.032719	-0.002239	0.0102131	0.0877475	0.0559416
*	TGA	N/A	N/A	N/A	N/A	N/A	N/A	N/A	N/A	N/A	N/A	N/A	N/A	N/A	N/A	N/A	N/A	N/A	N/A	N/A	N/A	N/A	N/A	N/A	N/A	N/A	N/A	N/A	N/A	N/A	N/A	N/A	N/A	N/A	N/A	N/A	N/A	N/A	N/A	N/A	N/A	N/A	N/A	N/A	N/A	N/A	N/A	N/A	N/A
W	TGG	-0.00774056	0.0251884	0.0263223	-0.00438543	0.00613836	-0.00247307	0.047568	0.0252489	0.00295665	-0.00551265	0.0128488	0.0191491	0.016745	0.0215565	0.0629172	0.0165916	0.00649879	-0.00293844	0.0198635	0.0117916	-0.00324532	0.0162713	0.0113436	-0.0115017	0.0377652	-0.00934763	0.0928918	0.110956	-0.00831625	-0.0177759	0.0300842	0.00741888	0.00545695	0.0354578	0.0219869	0.0183092	-0.0225286	0.0531077	-0.0829178	-0.0204076	0.0285973	0.0434483	0.0408993	0.106344	-0.00222886	-0.0205829	0.0378069	0.0358863
T	ACC	0.00431385	0.00579623	0.0207327	0.00283814	0.00536569	-0.00828125	-0.0273987	-0.00232947	0.0111263	0.0192508	0.0279964	0.0167907	-0.00353112	0.00818289	0.0196875	0.0110768	0.00168859	-0.0277507	0.0361208	-0.0166911	-0.00851869	0.0263972	-0.0100187	-0.00179747	0.0459155	0.00200568	0.0225597	0.0205981	-0.00481921	-0.00405198	-0.042184	0.00234702	-0.0174039	0.0309955	-0.00166332	-0.00198466	0.017655	0.0308719	-0.00991834	-0.0124035	0.0213878	0.0264114	0.00272487	0.0813856	-0.000227707	0.0255525	0.0471978	0.0546807
T	ACT	-0.0112869	0.0150228	-0.0124368	-0.0170059	-0.0073804	-0.00756215	0.000294848	-0.0620444	0.00241566	0.00590919	-0.0228719	2.67768e-05	0.00311794	0.0297231	-0.00158489	-0.00649275	-0.0296673	-0.048219	-0.0228701	-0.00112698	0.0107069	-0.0138122	-0.0153045	0.00663069	0.0125605	-0.00517399	0.0975545	-0.0352253	-0.00200919	-0.0168948	0.0775554	0.0278924	0.0245879	-0.0156352	-0.0192366	0.0130331	0.031803	0.00693987	0.0274066	-0.040584	0.00699602	0.0594482	0.130744	0.123115	0.0236934	0.0560756	0.0572662	0.030936
T	ACA	-0.00461799	-0.00682305	-0.00129192	0.00934575	-0.0116784	0.00333569	-0.0150491	-0.0162053	-0.000875119	-0.0142652	0.0265846	0.0155868	0.0228277	-0.00379163	0.0241092	0.00312681	-0.00798793	0.0147423	-0.0265627	-0.00822005	-0.0019814	0.0191506	0.047273	-0.00850068	-0.0242478	0.00920886	0.0650386	0.0503091	-0.00286804	-0.0362977	0.0369117	-0.00760114	0.0246414	0.0250192	-0.00900005	-0.00266698	0.00568743	0.00516671	0.00398675	-0.0140588	0.0242456	0.0336608	0.0589936	0.0435962	0.017852	0.00567951	-0.0194753	0.0515688
T	ACG	0.00389205	0.000416633	-0.000967636	0.0074136	-0.00638477	-0.00209857	0.0269203	0.0185737	0.0158049	0.0601503	0.0396768	0.033179	0.0154898	0.0133451	0.0144228	0.00508931	0.00576982	0.0109571	0.0135512	0.0125288	-0.0121327	0.0110086	0.0432095	0.00690586	-0.0277906	0.0154261	0.099644	0.0783833	-0.0161017	-0.014518	0.0715269	-0.0026349	0.00510199	-0.0048177	0.0316739	0.00364484	1.4845e-05	0.0366881	-0.0112659	0.0265214	0.0507791	0.0408597	0.0285096	0.0835225	0.0440263	0.00260525	0.0439975	0.0436152
I	ATC	0.00866389	0.035333	0.0487206	0.0279739	0.0206366	0.0132353	0.0318097	0.0309984	0.0450004	0.0247028	0.0481543	0.0159845	0.0489816	0.0653373	0.137982	0.0442247	0.00968043	-0.00175305	-0.0211633	0.019913	0.0343175	0.0199729	0.0888125	0.0646451	0.0390251	0.0819055	0.232476	0.219922	0.0129797	0.0229252	0.171785	0.0511367	0.0328461	0.0242692	0.0691274	0.0353442	0.0120723	0.132362	0.120134	0.0236277	0.0802234	0.169956	0.0580119	0.122833	0.0342657	0.102673	0.091644	0.0409692
I	ATT	0.0423768	0.022737	0.104365	0.0514024	0.0278864	0.00985131	0.0492395	-0.0207413	0.0268811	0.0106999	0.0393554	0.0614649	0.0342813	0.0388382	0.0969702	0.0318592	0.027796	-0.0426054	0.0168721	0.00615593	0.0365252	0.0493473	0.0686568	0.0301647	0.071257	-0.00652003	0.242767	0.148057	0.00744422	-0.00102859	0.15753	0.030067	0.0259299	0.0208024	0.0662483	0.0396432	0.026201	0.0364682	-0.0219573	0.00632757	0.0840379	0.0201798	0.119955	0.207721	0.0800314	0.0595124	0.144998	0.0328384
I	ATA	0.0381457	0.0620833	0.106019	0.0488509	0.0437821	0.0452499	-0.0265419	0.00110147	-0.000216565	-0.0155148	0.070256	0.0250316	0.0343881	0.0538236	0.103913	0.0401371	0.0187014	-0.000955203	0.00156874	0.0108889	-0.0240992	-0.0159843	0.0365971	0.0878666	-0.0132945	-0.0411151	0.286902	0.313381	0.0119614	-0.0175326	0.178788	0.0641567	0.0245381	0.030634	-0.00057237	0.109024	0.0213418	0.0502902	0.0613569	-0.00599577	0.0272416	0.0675258	0.11971	0.195709	0.0369756	-0.0583609	0.108217	0.139354
M	ATG	-0.00692082	0.0152999	0.0799211	0.0223552	-8.45258e-05	0.00853889	0.0178866	0.0404999	0.0502397	0.0342721	0.0438474	0.0641889	0.0180049	0.0227778	0.110374	0.0590341	-0.0130121	0.00417106	0.0049546	0.0361617	0.0224706	0.0326919	0.00155049	0.0313268	0.0106752	0.0189979	0.183312	0.130833	0.0208157	0.0062602	0.0887896	0.0268584	0.0447532	0.084884	0.0504729	0.0658198	0.0353434	0.050221	0.062199	0.0169838	0.0419145	0.0344194	0.0702261	0.110786	-0.000239425	0.100739	0.155433	0.0811146
N	AAC	0.0069291	0.0212263	0.037264	0.0116784	0.0177378	-0.0119295	-0.0108719	0.0358713	0.00679796	0.015513	0.0426511	0.0412205	0.0199734	-0.0197279	0.0392177	0.0132125	0.00116225	-0.0196807	0.0205701	0.031718	0.0127235	-0.0155287	0.156447	0.0593163	0.0103759	-0.00416737	0.185482	0.104735	0.00739817	-0.0207904	0.0443878	0.0209466	0.0116502	0.0178401	-0.0136076	0.0292579	0.0714034	0.064866	0.0316634	0.0266997	0.0682866	0.0978822	0.132289	0.134037	0.0284144	0.0167301	0.117359	0.0411649
N	AAT	-0.0120973	-0.0029598	0.00927787	-0.0189406	0.0169043	0.0418392	0.0904983	0.022997	-0.00545248	0.0467153	0.0279055	0.0401384	0.0223212	0.00512899	0.0571894	0.00460214	-0.0167672	-0.00197136	-0.0318971	-0.0107217	-0.027792	-0.0117391	0.0681292	0.0186662	-0.0202109	0.0461577	0.255388	0.154856	-0.0143514	0.0215341	0.108284	0.00256053	-0.0114062	-0.00445422	0.0534315	0.030951	0.0211374	0.0889589	0.0302254	0.0167545	0.0860897	0.01374	0.132062	0.144633	0.0399367	0.0180789	0.103917	0.0504341
K	AAA	0.0175218	-0.0113074	0.00171066	0.0108204	0.0272452	0.0593406	0.000198987	0.0394649	0.0031964	0.0326477	0.00264406	0.0164265	0.00228485	0.0475658	0.0424096	0.0242238	0.00667369	0.0309181	0.0428746	0.00805103	0.0178688	0.0412656	-0.0298683	0.0487415	0.0226628	0.0212661	0.19737	0.120083	-0.0231933	-0.0328453	0.0539681	0.00605276	0.0251638	0.0272502	0.0180234	0.0395334	0.027917	0.0302198	-0.0366658	-0.0212068	0.00142223	0.0626783	0.10583	0.123116	0.0194878	0.0641325	0.027321	0.0894405
K	AAG	-0.0029406	-0.00886285	0.00617781	-0.00321409	0.0153151	-0.00643937	-0.0185606	-0.0279157	-0.024023	-0.0311193	0.0118154	-0.00449368	0.0127482	0.00052716	-0.00603446	-0.0174789	0.0155806	-0.00551767	0.0070147	-0.00820303	-0.0220573	0.000449258	0.00192374	-0.0184043	0.0450043	0.0153519	0.0867907	0.0355332	0.0165692	-0.0164898	0.0613137	0.00994655	0.0291994	0.0130143	0.0185982	-0.0262135	-0.0198205	0.00145287	0.0250965	0.038111	0.0205881	0.024645	0.0282711	0.0269905	-0.0153392	-0.00756924	-0.0414729	0.0532736
S	AGC	-0.00437895	-0.0211097	0.0158702	-0.00633505	0.00674008	-0.0132162	0.0261702	0.00289262	-0.00818524	-0.0174975	0.0241897	0.0170497	0.00237072	0.00956676	0.0515603	-0.0156236	-0.00596967	0.0212261	0.00907181	0.00174269	-0.0124178	0.063381	-0.00302044	0.0108854	0.0253999	0.015903	-0.0396696	0.00292048	-0.0149343	-0.0152029	0.0164599	0.0146939	0.0152412	-0.00852088	0.00955573	0.0313681	-0.027727	-0.0293653	0.0143437	0.00268269	-0.0125502	0.0338718	0.0506164	0.109462	0.0218502	-0.0295574	0.112522	0.00632341
S	AGT	-0.0196329	-0.00235946	-0.0126178	0.00275301	-0.0220074	-0.00705776	-0.0140181	-0.0308362	-0.0035683	-0.00857909	0.0208836	0.0085958	-0.00615521	0.0144633	0.0158027	0.00574523	-0.00261952	-0.00691037	-0.00846984	-0.00941691	-0.015134	-0.0369292	0.0438834	0.00846625	-0.019216	0.00743599	0.0307276	0.0464695	-0.00932069	0.00759967	0.0079994	-0.0514988	0.00436388	0.000144636	0.0378749	0.0206439	0.0109574	0.0233907	-0.00742053	0.043244	-0.00941984	0.0040092	0.0771175	0.0617033	-0.0239011	0.0252942	0.0707229	0.0560317
R	AGA	-0.0225638	-0.0048164	-0.00794617	-0.00885402	-0.00348981	-0.0148321	0.0391535	-0.00627957	-0.0361625	-0.0282374	-0.00464124	0.0222484	-0.0112857	0.00856247	-0.00319746	-0.0212424	-0.020535	-0.00909741	0.0169884	-0.0046237	-0.00154585	-0.0363085	-0.0154026	0.0259082	-0.00921246	0.00604877	0.0386681	0.0732958	-0.0168056	-0.0104791	-0.0921318	0.02593	-0.0255625	0.047359	-0.02824	-0.00457235	-0.016047	-0.00361555	0.0126983	-0.0360452	-0.0162495	-0.00288469	0.0361159	0.00631902	-0.00365995	-0.0391188	0.0620106	0.026206
R	AGG	-0.00842079	-0.00666714	-0.00635853	-0.0196079	-0.0118972	0.0010065	-0.00930955	-0.00788495	0.00158567	-0.00037562	0.0209288	0.0472497	0.0224438	0.0324197	0.00765236	0.031199	0.00625804	0.0264331	0.0429064	0.0223697	-0.00946346	0.017279	0.0137203	-0.00450308	0.00692094	0.00310642	0.0351817	0.0446506	9.18941e-05	-0.0137682	-0.00164482	-0.00258907	-0.00303034	0.0280579	0.00910969	0.00896114	0.00132729	-0.016261	0.0853626	-0.00281667	0.0160633	0.0191005	0.0441683	0.0941512	-0.00482018	0.00676161	-0.00300156	0.0350959
A	GCC	0.00224006	0.00627384	0.0145706	-0.00179423	0.00721591	0.00360998	0.0037288	0.00956581	0.0166197	-0.00280169	0.0225724	0.0287242	0.00342081	0.0192042	0.0313899	0.00766436	-0.00402965	-0.0119447	0.0203032	-0.0025455	0.00977761	0.0120739	0.0234062	0.0453464	0.0307376	0.0203741	0.0260199	0.0703136	-0.00414665	-0.0188372	0.036479	0.0274512	0.00806827	0.0290912	0.0025055	0.0110324	0.00813913	0.0368355	-0.00473416	0.0597514	0.0555099	0.046852	0.0548382	0.0656659	0.00372166	0.022387	0.0671215	0.0258655
A	GCT	-0.0047599	0.0179376	0.0267917	0.00228204	-0.00424626	0.019962	0.0083114	0.0278515	0.0234906	0.0154868	0.0392895	0.0120978	0.0235592	0.0147211	0.0516181	0.0229211	0.00611095	-0.00620969	0.0272586	0.0217426	0.0138333	-0.0146626	-0.00980891	0.00887343	0.0435298	0.0270455	0.032469	0.0843135	-0.0150471	-0.00691638	0.0444379	0.0375853	0.000416169	0.0115506	0.027879	0.00765282	0.0361576	0.0367793	0.0408315	0.0314457	0.0787286	0.0899679	0.15485	0.068017	0.0128949	0.0579177	0.0638694	0.0393159
A	GCA	0.0119262	0.0214854	0.0146016	0.00643436	0.0226934	0.00570336	0.00128232	0.0217354	0.0264328	0.0221468	0.0537941	0.0179947	0.0301855	0.0106484	0.0436563	0.0428647	0.0158427	-0.00850395	0.00550982	-0.00144542	-0.00982893	-0.0075596	0.00426691	0.0548307	0.0118059	0.0305362	0.0420885	0.10991	0.00722052	0.0469288	-0.00588145	-0.00133766	0.00921709	0.0451916	0.0471844	0.0495825	0.0142272	0.0226331	0.0997663	0.0270931	0.0450364	0.0914218	0.0927337	0.0508764	0.0107125	0.0342471	0.0358557	0.0545692
A	GCG	0.00451871	0.0308489	0.01456	-0.00209685	0.00840257	0.0173171	-0.00452637	0.0238443	-0.00462903	0.0220782	0.0221415	0.0127157	0.0154594	0.01923	0.0472674	0.0250298	0.0148008	0.0374844	0.0168193	-0.00366611	-0.00909451	0.0295979	0.0278607	0.0185915	-0.000303496	0.0603249	-0.0343453	0.0152114	-0.0114078	-0.0108895	-0.00163487	0.00571416	-0.0224234	0.0352445	0.0138109	0.0179915	0.0317717	0.00934473	0.053934	0.0396382	0.0190667	0.0624298	0.0884305	0.0564414	0.023236	-0.00891096	0.0434623	0.0281415
V	GTC	0.0148001	0.00437798	0.0221068	0.0100291	0.0066667	0.005247	0.0285528	0.00998071	0.0185125	-0.000505862	0.0213837	0.0385554	0.0130378	-0.0012347	0.043588	0.0309202	0.016001	0.0140548	-0.0124097	0.0119986	0.0134841	-0.0230685	-0.00477548	0.0885413	0.0125632	-0.0217809	0.072994	0.0835632	-0.00377096	0.0242963	0.104454	0.0204571	0.0291561	0.0335872	0.0269708	0.0386119	0.0105365	0.0692383	0.0255721	0.0203449	0.0482273	0.0571891	0.0222472	0.07575	-0.00406986	0.0711049	0.0678794	0.0212775
V	GTT	0.0035473	0.028885	0.009082	0.0315453	0.000934835	-0.00304601	-0.033331	0.00215858	0.0133297	0.000931029	-0.00912396	0.0444477	0.0271372	0.0290254	0.0615238	0.0409472	0.0109038	0.0261639	0.00645558	0.0188493	-0.00116211	0.0161804	0.0267648	0.0346512	0.00211706	0.0617166	0.147282	0.161588	0.00627929	0.0128367	0.134329	0.0394491	-0.00532278	0.0102875	0.0199867	0.0364005	-0.0160312	-0.00225271	0.0416274	-0.00169095	0.0738101	0.0772574	0.0872067	0.176041	0.0102578	0.00399301	0.0942494	0.0242233
V	GTA	0.0300716	0.0239046	0.0343499	0.00352721	0.0195618	-0.0237315	-0.0216322	0.0101563	0.0150128	-0.0211361	0.0273946	0.0179248	0.0231035	-0.00649586	0.136382	0.0341449	0.0369245	0.00967152	0.00628435	0.0117065	-0.00569426	0.0157428	0.0207971	0.0149658	0.0324123	0.0275299	0.226285	0.182422	-0.0039976	-0.00392369	0.0921765	0.0177833	0.0141154	0.0465261	0.0736654	0.0363146	0.0457229	0.0517573	0.0171529	-0.0182612	0.0343658	0.0386746	0.192189	0.104031	0.0292704	0.0240378	0.122291	0.089131
V	GTG	0.0186301	0.0113231	0.0202772	0.022056	0.0208801	-0.00338704	-0.00523507	0.00834652	0.0044099	0.0092785	0.082191	0.0111289	0.0243962	0.0218242	0.0278673	0.0389859	0.00277989	-0.0149413	0.0427585	0.03531	0.0109602	0.00299217	0.0393335	0.0417886	-0.0152272	0.0727266	0.0609666	0.106425	-0.00130006	-0.00368999	0.116712	0.0484322	0.00187611	0.0327782	0.0375202	0.0396236	0.0133579	0.0871988	0.0722506	0.00293346	0.0603072	0.137081	0.0917044	0.155462	0.014643	-0.0108622	0.0704781	0.0477135
D	GAC	0.00370694	-0.000636515	-0.00723304	0.00167459	0.00172096	-0.00796495	-0.0240278	-0.00239261	0.0125805	0.0132552	0.0238239	0.0216769	-0.00149911	0.00407802	0.0205098	0.00744152	-0.0145968	-0.00587415	-0.00805497	-0.00847978	0.0150942	-0.012563	-0.00440966	0.0214189	0.018866	-0.0129756	0.131422	0.0258707	-0.00515641	-0.0209051	0.0436079	0.0204582	0.00811565	0.040643	0.04429	0.00570664	0.0293103	0.0463573	-0.031395	0.0101343	0.0488066	0.0505518	0.00817047	0.0312217	0.0230096	0.00826139	0.0247226	-0.0189742
D	GAT	0.0109871	-0.00120788	-0.0222772	0.0106572	0.025391	0.0288923	-0.00760962	-0.0116256	-0.00278979	0.030202	0.0352829	-0.00431405	0.00686788	0.0107268	-0.00413396	0.0147466	0.015858	0.00313886	0.0320034	-0.00418191	0.00180369	0.0555051	-0.015767	0.0294907	0.0313583	0.00754122	0.117812	0.102517	-0.00436312	0.0230293	0.104914	0.0522516	0.00620024	-0.0275265	0.0243738	-0.017154	-0.0135108	0.00750601	0.0810526	0.00411875	-0.0116611	0.0248532	0.110032	0.0247047	0.0271123	0.0117113	0.0422601	0.0289131
E	GAA	-6.96797e-05	0.00423753	-0.00571578	0.000978949	-0.0049815	0.00614955	-0.0282335	0.0147339	0.0039415	-0.0218325	-0.0256193	-0.00557244	0.0167177	-0.0120301	-0.00662494	0.0025408	0.00706262	0.0300672	0.044647	0.0025855	-0.0169122	-0.0469511	-0.00226409	-0.00416153	0.00265486	-0.011467	0.111514	0.101529	0.0187708	-0.0268689	-0.00488192	0.0337411	0.00406133	0.0267457	-0.0114587	-0.00685681	0.0611204	0.00605487	0.00327885	0.0298677	0.00738834	0.0345314	0.0449944	0.0634616	0.0366904	0.0301084	0.0165004	0.0319596
E	GAG	-0.00275745	-0.0338962	0.00168143	-0.00226373	-0.00579766	0.00640605	-0.0140142	-0.0146958	-0.00723178	0.000337442	0.0125053	-0.0314166	-0.000935013	-0.014017	0.0177205	-0.00750688	-0.0110981	0.0218992	-0.0116427	-0.0201582	-0.0186411	0.0343303	-0.0218319	0.00847459	-0.00386819	-0.0279041	0.0458825	0.062038	0.0117152	-0.00237918	-0.0527288	0.00841423	0.00779489	-0.00601954	0.0273573	0.0208971	-0.0119845	-0.0577885	-0.0103845	-0.0134834	0.0218459	0.0560461	-0.0174763	0.0561532	0.00694356	-0.0355844	-0.0136022	0.00284615
G	GGC	0.00780917	0.00164936	0.0228682	0.00666051	0.00750842	0.0124662	-0.00966739	0.0172547	0.0231494	0.020239	0.0174049	0.0105877	0.0157047	-0.00295442	0.043242	0.0207727	0.0150813	0.0174011	0.0235785	0.0194331	0.0160295	-0.0115645	-0.0311642	0.0358323	0.0431501	0.0448527	0.019597	-0.0240353	0.00950742	0.0288838	-0.0501875	0.0258329	0.0227492	0.011727	-0.000729016	0.00185891	0.0120666	0.0206795	0.0389584	0.0159118	0.0598357	0.0419652	0.0347666	0.0541803	0.0384682	0.0193686	0.0548307	0.0397912
G	GGT	0.00191815	0.0183322	0.0380873	-0.000935574	0.0115938	0.00742251	-0.0376319	0.010717	0.0171107	0.00790183	-0.00637391	0.0248675	0.00457058	0.0172914	0.0385236	0.0114141	-0.00765645	0.0164856	0.00585776	0.0252592	0.0326611	0.0361493	-0.0140361	0.012514	0.000750897	0.0566779	0.00896183	0.0797935	-0.00237185	0.0140713	0.0331776	-0.00221725	0.0177745	0.0463963	0.0319412	0.0293732	0.0240565	0.0171621	0.0761527	0.011053	0.0535274	0.0274973	0.0465534	0.0820901	0.0335044	0.0257558	0.0155597	0.0253621
G	GGA	-0.00160908	0.00344781	0.0119236	0.00471328	0.00884369	0.000846452	-0.0478878	-0.00170437	0.0233036	0.046986	0.00146283	0.00581888	0.000497507	-0.00815403	0.0563119	0.0194102	0.0135794	0.0707622	0.0176639	-0.00741835	0.0123931	0.0253771	-0.013901	0.0242155	0.02369	0.00323058	-0.0143162	0.0275597	0.00988504	-0.0137845	0.0476933	0.0126299	0.0306891	-0.0365002	0.0332371	0.0219043	-0.0218677	0.0421435	0.0630403	0.0320037	0.0731297	0.00261491	0.0649238	0.00537054	0.0317424	-0.0039299	0.0806933	0.0396628
G	GGG	0.00283335	0.00610929	0.0308584	0.00632435	0.00173451	0.000911498	0.0179703	0.0166204	0.0230114	-0.000445359	0.0409695	0.0231735	0.00587442	-0.00425349	0.0264789	0.0306286	0.0185451	0.0305428	0.0210412	0.0239951	0.0126836	0.00735561	0.0130117	0.0329278	0.0295742	-0.0204395	0.0372269	-0.0160112	-0.0185808	-0.00489241	0.0171067	0.0243196	0.0286737	0.028434	0.0287823	-0.00195697	0.025983	-0.0223194	0.0374009	0.00212021	0.0334642	0.0509612	0.0884004	0.0491497	0.0326846	-0.00411702	0.0619554	0.0370259
[truncated: 214 more columns]

## Sheet: P-value for 2D codon heatmap
P-values for shuffled datasets exceeding experimental data of 2-dimensional representation of stalling propensities with the corresponding codons located in the P- and A-sites
P\A		Codons located in the A-site
		CCC	CCT	CCA	CCG	CTC	CTT	CTA	CTG	CAC	CAT	CAA	CAG	CGC	CGT	CGA	CGG	TCC	TCT	TCA	TCG	TTC	TTT	TTA	TTG	TAC	TAT	TAA	TAG	TGC	TGT	TGA	TGG	ACC	ACT	ACA	ACG	ATC	ATT	ATA	ATG	AAC	AAT	AAA	AAG	AGC	AGT	AGA	AGG
P	CCC	1	1	1	1	1	1	1	0.999003	0.963111	0.941176	0.97009	0.991027	0.999003	0.985045	0.99003	1	0.996012	0.475573	0.878365	0.988036	0.925224	0.890329	0.667996	1	0.95015	0.260219	1	0.957129	1	0.998006	1	0.998006	0.971087	0.86341	0.998006	0.96012	0.972084	0.794616	0.976072	0.400798	0.651047	0.864407	0.852443	0.537388	0.964108	0.433699	0.964108	1
P	CCT	1	0.999003	0.998006	0.999003	0.597208	0.949153	0.998006	0.938185	0.683948	0.235294	0.000997009	0.870389	0.966102	0.542373	0.882353	0.956132	0.994018	0.700897	0.764706	0.920239	0.924227	0.982054	0.727817	0.639083	1	0.957129	0.144566	0.999003	1	0.937188	0.936191	0.998006	0.945165	0.975075	0.0348953	0.404786	0.949153	0.413759	0.228315	0.793619	0.368893	0.753739	0.531406	0.474576	0.783649	0.49651	0.231306	0.981057
P	CCA	1	0.997009	0.994018	1	0.773679	0.917248	0.928215	0.488534	0.227318	0.878365	0.403789	0.475573	0.993021	0.939182	0.899302	0.996012	0.757727	0.329013	0.0508475	0.130608	0.199402	0.123629	0.511466	0.387836	0.695912	0.984048	0.686939	0.967099	0.977069	0.626122	1	0.705882	0.992024	0.482552	0.658026	0.962114	0.627119	0.877368	0.297109	0.0289133	0.872383	0.407777	0.187438	0.291127	0.556331	0.984048	0.595214	0.989033
P	CCG	1	0.900299	0.991027	1	1	1	1	0.846461	0.986042	0.355932	0.440678	0.975075	0.916251	0.924227	0.982054	0.999003	0.495513	0.422732	0.666999	0.666999	0.742772	0.762712	0.2333	0.548355	0.122632	0.966102	0.705882	0.998006	0.999003	0.945165	0.768694	0.953141	0.724826	0.397807	0.160518	0.792622	0.967099	0.721834	0.176471	0.0508475	0	0.771685	0.576271	0.898305	0.176471	0.637089	0.652044	0.884347
L	CTC	0.999003	0.988036	0.998006	0.805583	0.45663	0.867398	0.922233	0.861416	0.205384	0.435693	0.0209372	0.402792	0.731805	0.715852	0.241276	0.739781	0.854437	0.546361	0.977069	0.921236	0.891326	0.577268	0.899302	0.948156	0.882353	0.87338	0	0.000997009	0.821535	0.502493	0.104686	0.787637	0.58325	0.451645	0.130608	0.588235	0.595214	0.341974	0.63011	0.649053	0.247258	0.74676	0.119641	0	0.880359	0.999003	1	0.0299103
L	CTT	0.987039	0.346959	0.540379	0.250249	0.864407	0.635095	0.986042	0.713858	0.294118	0.624128	0.0518445	0.57328	0.911266	0.877368	0.31007	0.458624	0.831505	0.332004	0.995015	0.92323	0.938185	0.644068	0.145563	0.889332	0.528415	0.70987	0.00797607	0.0279163	0.194417	0.996012	0.00997009	0.866401	0.749751	0.537388	0.57328	0.393819	0.812562	0.526421	0.0578265	0.904287	0.0348953	0.279163	0.0398804	0.00199402	0.778664	0.810568	0.740778	0.324028
L	CTA	0.791625	0.397807	0.841476	0.323031	0.911266	0.919242	0.20339	0.25324	0.82652	0.978066	0.661017	0.584247	0.995015	0.701894	0.0777667	0.450648	0.921236	0.0967099	0.764706	0.998006	0.955135	0.836491	0.723829	0.694915	0.886341	0.774676	0.00398804	0.0358923	0.647059	0.837488	0.48654	0.375872	0.14656	0.763709	0.775673	0.27318	0.353938	0.914257	0.850449	0.744766	0.249252	0.678963	0.000997009	0	0.284148	0.972084	1	0.133599
L	CTG	0.787637	0.184447	0.224327	0.000997009	0.105683	0.285145	0.237288	0.0199402	0.0388833	0.599202	0.00498504	0.0189432	0.0508475	0.432702	0.00199402	0.564307	0.121635	0.229312	0.252243	0.0428714	0.612164	0.864407	0.550349	0.936191	0.996012	0.493519	0.0388833	0.000997009	0.924227	0.946162	0	0.63011	0.619143	0.448654	0.611167	0.0687936	0.568295	0.17348	0.0568295	0.429711	0	0.846461	0.115653	0.00398804	0.586241	0.986042	0.638086	0.782652
H	CAC	0.636092	0.169492	0.00997009	0.357926	0.508475	0.328016	0.0219342	0.892323	0.370887	0.000997009	0.128614	0	0.706879	0.0967099	0.657029	0.789631	0.28016	0.48654	0.820538	0.301097	0.759721	0.247258	0.595214	0.700897	0.847458	0.289133	0.00199402	0.00398804	0.851446	0.618146	0.3001	0.158524	0.66999	0.530409	0.0468594	0.0628116	0.224327	0.184447	0.00997009	0.355932	0.00598205	0.631107	0.00498504	0	0.295115	0.0887338	0	0.000997009
H	CAT	0.969093	0.642074	0.0538385	0.905284	0.275174	0.398804	0.629113	0.0458624	0.0368893	0.210369	0.0129611	0.000997009	0.911266	0.789631	0.0229312	0.00598205	0.591226	0.878365	0.907278	0.205384	0.979063	0.402792	0.0638086	0.0618146	0.0987039	0.832502	0	0.000997009	0.984048	0.477567	0.163509	0.340977	0.539382	0.497507	0.0548355	0.917248	0.795613	0.673978	0.28016	0.142572	0.267198	0.0697906	0.000997009	0	0.870389	0.632104	0.0887338	0.00498504
Q	CAA	0.355932	0.272183	0.628116	0.447657	0.910269	0.704885	0.615155	0.337986	0.631107	0.39681	0.176471	0.820538	0.15653	0.195414	0.415753	0.00897308	0.274177	0.895314	0.294118	0.568295	0.343968	0.852443	0.324028	0.658026	0.399801	0.33001	0	0.000997009	0.518445	0.761715	0.161515	0.613161	0.831505	0.501496	0.317049	0.41675	0.778664	0.758724	0.452642	0.619143	0.0837488	0.639083	0.00697906	0.00299103	0.556331	0.0987039	0.00398804	0.000997009
Q	CAG	0.963111	0.99003	0.0398804	0.614158	0.481555	0.365902	0.750748	0.875374	0.218345	0.361914	0.316052	0.672981	0.120638	0.32004	0.554337	0.192423	0.761715	0.877368	0.158524	0.996012	0.995015	0.942173	0.401795	0.328016	0.928215	0.836491	0.000997009	0.0817547	0.808574	0.797607	0.0608175	0.129611	0.754736	0.430708	0.185444	0.842473	0.789631	0.400798	0.282154	0.759721	0.218345	0.174477	0.0259222	0.0368893	0.971087	0.232303	0	0.000997009
R	CGC	0.787637	0.618146	0.494516	0.907278	0.720837	0.314058	1	0.785643	0.839482	0.167498	0.43669	0.475573	0.312064	0.39681	0.0219342	0.207378	0.911266	0.306082	0.982054	0.511466	0.587238	0.405783	0.0548355	0.634098	0.774676	0.947159	0.187438	0.0119641	0.996012	0.747757	0.0967099	0.377866	0.75673	0.0837488	0.739781	0.775673	0.484546	0.803589	0.451645	0.922233	0.713858	0.458624	0.276171	0.00199402	0.7667	0.547358	0.206381	0.236291
R	CGT	0.972084	0.534397	0.149551	0.884347	0.221336	0.454636	0.215354	0.160518	0.514457	0.696909	0.14656	0.437687	0.571286	0.111665	0.392822	0.702891	0.971087	0.281157	0.296112	0.287139	0.900299	0.667996	0.326022	0.859422	0.27318	0.62014	0.0867398	0.0338983	0.3001	0.648056	0.809571	0.929212	0.894317	0.737787	0.0957129	0.50349	0.704885	0.480558	0.000997009	0.967099	0.851446	0.691924	0	0.365902	0.0289133	0.655035	0.000997009	0.147557
R	CGA	0.841476	0.144566	0.0747757	0.994018	0.729811	0.971087	1	0.868395	0.534397	0.997009	0.664008	0.822532	0.389831	0.802592	0.705882	0.0209372	0.224327	0.684945	0.975075	0.111665	0.564307	0.804586	0.68993	0.916251	0.878365	0.353938	0.48654	0.199402	0.914257	0.995015	0.795613	0.98006	0.672981	0.190429	1	0.99003	0.28016	0.894317	0.654038	0.451645	0.926221	0.999003	0.481555	0.564307	0.811565	1	0.345962	0.00398804
R	CGG	0.0827517	0.413759	0.120638	0.602193	0.599202	0.85344	0.962114	0.388833	0.291127	0.92323	0.0518445	0.897308	0.813559	0.155533	0.0159521	0.133599	0.947159	0.807577	0.141575	0.772682	0.979063	0.472582	0.172483	0.412762	0.644068	0.128614	0.0817547	0.872383	0.9332	0.94317	0.718843	0.92323	0.153539	0.198405	0.612164	0.0478564	0.781655	0.889332	0.760718	0.525424	0.395813	0.473579	0.000997009	0	0.781655	0.686939	0.0727817	0.00199402
S	TCC	0.940179	0.691924	0.946162	0.999003	0.844467	0.0388833	0.989033	0.916251	0.198405	0.649053	0.618146	0.616152	0.978066	0.200399	0.910269	0.882353	0.97009	0.673978	0.929212	0.617149	0.989033	0.814556	0.939182	0.805583	0.14656	0.119641	0.946162	0.953141	0.782652	0.963111	0.373878	0.971087	0.785643	0.412762	0.946162	0.107677	0.86341	0.304088	0.945165	0.832502	0.721834	0.111665	0.725823	0.333001	0.702891	0.82652	0.596211	0.462612
S	TCT	0.531406	0.534397	0.738784	0.47657	0.94317	0.241276	0.701894	0.946162	0.633101	0.772682	0.929212	0.187438	0.716849	0.0887338	0.0159521	0.71984	0.708873	0.425723	0.388833	0.529412	0.764706	0.570289	0.974078	0.447657	0.232303	0.675972	0.0687936	0	0.188435	0.753739	0.197408	0.122632	0.889332	0.261216	0.920239	0.0508475	0.866401	0.623131	0.36989	0.698903	0.0967099	0	0.491525	0.0149551	0.743769	0.47657	0.00598205	0.00299103
S	TCA	0.584247	0.462612	0.0109671	0.953141	0.0977069	0.812562	0.885344	0.475573	0.0448654	0.759721	0.0468594	0.0478564	0.0368893	0.258225	0.130608	0.0448654	0.541376	0.495513	0.835494	0.994018	0.934197	0.276171	0.438684	0.194417	0.720837	0.235294	0.554337	0.0478564	0.289133	0.703888	0.177468	0.00398804	0.463609	0.191426	0.321037	0.634098	0.333001	0.178465	0.115653	0.581256	0.361914	0	0.120638	0	0.497507	0.525424	0.317049	0.210369
S	TCG	0.857428	0.178465	0.354935	0.818544	0.898305	0.153539	0.927218	0.634098	0.710867	0.703888	0.92323	0.627119	0.0338983	0.512463	0.700897	0.856431	0.995015	0.809571	0.00498504	0.878365	0.483549	0.390828	0.0897308	0.932203	0.377866	0.734796	0.989033	0.511466	0.672981	0.972084	0.995015	0.566301	0.153539	0.475573	0.864407	0.546361	0.344965	0.360917	0.940179	0.260219	0.0827517	0.576271	0.514457	0.00398804	0.499501	0.483549	0.00199402	0
F	TTC	0.0378863	0.00797607	0.0139581	0.983051	0.216351	0.0309073	0.0967099	0.725823	0.0408774	0.368893	0.491525	0.0757727	0.00797607	0.00398804	0	0.00797607	0.00997009	0.0857428	0.981057	0.18345	0.4666	0.174477	0.185444	0	0.0139581	0.13659	0	0	0.694915	0.907278	0.00697906	0	0.0827517	0.0538385	0.34995	0.415753	0.211366	0.286142	0.0319043	0.112662	0.0777667	0.0857428	0.000997009	0	0.457627	0.443669	0	0
F	TTT	0.0109671	0.0648056	0.291127	0.742772	0.659023	0.0887338	0.0488534	0.00199402	0.00697906	0.148554	0.515454	0	0.00997009	0.292124	0.00897308	0.0119641	0.35992	0.556331	0.467597	0.336989	0.176471	0.621137	0.184447	0.0488534	0.108674	0.514457	0	0	0.192423	0.439681	0	0.0119641	0.394816	0.347956	0.205384	0.696909	0.488534	0.372881	0.309073	0.370887	0.121635	0.0169492	0.172483	0	0.398804	0.0269192	0.105683	0.00498504
L	TTA	0.402792	0.0338983	0.404786	0.188435	0.0398804	0.433699	0.124626	0.00299103	0.0149551	0.0408774	0.00299103	0.0129611	0.982054	0.264207	0.178465	0	0.780658	0.608175	0.0388833	0.55334	0.860419	0.42672	0.0259222	0.100698	0.861416	0.992024	0	0	0.924227	0.510469	0.170489	0.147557	0.0408774	0.477567	0.0827517	0.00797607	0.0618146	0.241276	0.957129	0.111665	0.697906	0.158524	0.00498504	0	0.787637	0.20339	0.00697906	0.000997009
L	TTG	0.557328	0.518445	0.350947	0.691924	0.0937188	0.894317	0.96012	0.0468594	0.377866	0.570289	0.1665	0.599202	0.324028	0.162512	0.0378863	0.546361	0.963111	0.584247	0.192423	0.3001	0.80658	0.29013	0.957129	0.54337	0.947159	0.472582	0.00398804	0	0.605184	0.963111	0	0.00598205	0.435693	0.596211	0.287139	0.184447	0.0139581	0.0428714	0.347956	0.15653	0.490528	0.0438684	0.0219342	0.12662	0.0747757	0.218345	0.0299103	0.100698
Y	TAC	0.552343	0.0538385	0.230309	0.2333	0.607178	0.259222	0.975075	0.297109	0.00598205	0.108674	0.204387	0.0259222	0.953141	0.703888	0.138584	0.00299103	0.581256	0.693918	0.905284	0.402792	0.708873	0.107677	0.109671	0.0159521	0.0149551	0.0249252	0.00299103	0	0.828514	0.0159521	0.00598205	0.000997009	0.73679	0.0279163	0.288136	0.184447	0.0259222	0	0.68993	0.295115	0	0	0.0189432	0	0.000997009	0.00797607	0.00299103	0
Y	TAT	0.551346	0.0677966	0.0129611	0.298106	0.0947159	0.33998	0.542373	0.908275	0.0249252	0.249252	0.104686	0.000997009	0.148554	0.44666	0.383848	0	0.41675	0.478564	0.728814	0.762712	0.362911	0.564307	0.178465	0.0179462	0.341974	0.737787	0	0	0.978066	0.457627	0	0.000997009	0.570289	0.932203	0.0538385	0.0877368	0.00797607	0.721834	0.108674	0.510469	0	0.00897308	0.00199402	0	0.259222	0.560319	0.0279163	0
*	TAA	N/A	N/A	N/A	N/A	N/A	N/A	N/A	N/A	N/A	N/A	N/A	N/A	N/A	N/A	N/A	N/A	N/A	N/A	N/A	N/A	N/A	N/A	N/A	N/A	N/A	N/A	N/A	N/A	N/A	N/A	N/A	N/A	N/A	N/A	N/A	N/A	N/A	N/A	N/A	N/A	N/A	N/A	N/A	N/A	N/A	N/A	N/A	N/A
*	TAG	N/A	N/A	N/A	N/A	N/A	N/A	N/A	N/A	N/A	N/A	N/A	N/A	N/A	N/A	N/A	N/A	N/A	N/A	N/A	N/A	N/A	N/A	N/A	N/A	N/A	N/A	N/A	N/A	N/A	N/A	N/A	N/A	N/A	N/A	N/A	N/A	N/A	N/A	N/A	N/A	N/A	N/A	N/A	N/A	N/A	N/A	N/A	N/A
C	TGC	0.122632	0.122632	0.0428714	0.547358	0.29013	0.838485	0.39681	0.0687936	0.261216	0.0249252	0.780658	0.247258	0.3001	0.0578265	0.00598205	0.000997009	0.864407	0.0458624	0.0259222	0.122632	0.374875	0.329013	0.784646	0.0149551	0.742772	0.115653	0.00398804	0	0.60319	0.483549	0.00697906	0.0927218	0.162512	0.904287	0.0149551	0.619143	0.297109	0.333001	0.599202	0.0458624	0.000997009	0.708873	0.00897308	0.000997009	0.0797607	0.256231	0	0
C	TGT	0.983051	0.774676	0.0119641	0.311067	0.814556	0.104686	0	0.155533	0.0249252	0.159521	0.918245	0.0518445	0.389831	0.427717	0.0648056	0.232303	0.29013	0.535394	0.627119	0.495513	0.44666	0.900299	0.967099	0.596211	0.0847458	0.997009	0.00199402	0	0.501496	0.487537	0.0109671	0.738784	0.88335	0.0987039	0.0348953	0.989033	0.123629	0.118644	0.895314	0.0588235	0.561316	0.439681	0	0.410768	0.905284	0.521436	0.000997009	0.0598205
*	TGA	N/A	N/A	N/A	N/A	N/A	N/A	N/A	N/A	N/A	N/A	N/A	N/A	N/A	N/A	N/A	N/A	N/A	N/A	N/A	N/A	N/A	N/A	N/A	N/A	N/A	N/A	N/A	N/A	N/A	N/A	N/A	N/A	N/A	N/A	N/A	N/A	N/A	N/A	N/A	N/A	N/A	N/A	N/A	N/A	N/A	N/A	N/A	N/A
W	TGG	0.999003	0.172483	0.170489	0.964108	0.807577	0.85344	0.0957129	0.288136	0.828514	0.94317	0.484546	0.333001	0.284148	0.153539	0.00199402	0.51346	0.674975	0.809571	0.350947	0.527418	0.865404	0.389831	0.653041	0.947159	0.143569	0.92323	0.00398804	0	0.986042	0.9332	0.189432	0.727817	0.666002	0.0817547	0.351944	0.485543	0.977069	0.17348	1	0.977069	0.254237	0.113659	0.248255	0	0.855434	0.924227	0.0638086	0.0927218
T	ACC	0.698903	0.551346	0.0717846	0.701894	0.649053	0.890329	0.984048	0.80658	0.410768	0.212363	0.159521	0.313061	0.945165	0.55334	0.191426	0.333001	0.729811	0.993021	0.107677	0.986042	0.882353	0.215354	0.8335	0.637089	0.00997009	0.728814	0.517448	0.399801	0.868395	0.802592	0.989033	0.539382	0.989033	0.0857428	0.758724	0.900299	0.262213	0.0867398	0.627119	0.814556	0.279163	0.228315	0.762712	0.00299103	0.798604	0.0747757	0.00997009	0.00299103
T	ACT	0.975075	0.316052	0.9332	0.973081	0.897308	0.824526	0.495513	1	0.739781	0.780658	0.974078	0.754736	0.754736	0.0448654	0.881356	0.986042	0.999003	0.996012	0.948156	0.823529	0.472582	0.820538	0.825523	0.712861	0.506481	0.68993	0.0259222	0.910269	0.914257	0.905284	0.0219342	0.0957129	0.10668	0.891326	0.845464	0.439681	0.13659	0.596211	0.293121	0.966102	0.782652	0.102692	0	0	0.0757727	0.0119641	0.0269192	0.293121
T	ACA	0.922233	0.781655	0.830508	0.321037	0.940179	0.538385	0.925224	0.96012	0.915254	0.947159	0.363908	0.445663	0.149551	0.616152	0.111665	0.610169	0.898305	0.248255	0.968096	0.823529	0.784646	0.338983	0.0259222	0.799601	0.965105	0.441675	0.102692	0.0398804	0.73679	0.981057	0.204387	0.900299	0.129611	0.112662	0.906281	0.695912	0.716849	0.677966	0.626122	0.856431	0.302094	0.194417	0.00697906	0.114656	0.383848	0.677966	0.94317	0.0907278
T	ACG	0.847458	0.782652	0.846461	0.754736	0.858425	0.710867	0.182453	0.341974	0.24327	0.00697906	0.0508475	0.0279163	0.363908	0.65005	0.591226	0.641077	0.63011	0.467597	0.410768	0.350947	0.914257	0.589232	0.201396	0.628116	0.98006	0.407777	0.000997009	0.00398804	0.99003	0.967099	0.00697906	0.81655	0.732802	0.82652	0.147557	0.670987	0.757727	0.410768	0.71984	0.277168	0.0299103	0.255234	0.404786	0.00398804	0.00997009	0.656032	0.0977069	0.0408774
I	ATC	0.449651	0.122632	0.00997009	0.00398804	0.554337	0.584247	0.181456	0.160518	0.0269192	0.308076	0.0368893	0.480558	0.00697906	0.00299103	0	0.00398804	0.639083	0.817547	0.959123	0.412762	0.278166	0.64008	0.159521	0.0388833	0.111665	0.0249252	0	0	0.531406	0.114656	0	0.0309073	0.0618146	0.190429	0.00997009	0.161515	0.449651	0.000997009	0.000997009	0.331007	0.00498504	0	0.111665	0	0.218345	0.00299103	0	0.129611
I	ATT	0.00398804	0.311067	0	0.000997009	0.179462	0.655035	0.142572	0.967099	0.333998	0.600199	0.24327	0.0309073	0.0219342	0.142572	0.00498504	0.199402	0.288136	0.955135	0.528415	0.839482	0.128614	0.179462	0.0857428	0.501496	0.00398804	0.91326	0	0	0.599202	0.748754	0	0.281157	0.302094	0.414756	0.0239282	0.252243	0.400798	0.306082	0.88335	0.730808	0.0129611	0.491525	0	0	0.00199402	0.0687936	0	0.403789
I	ATA	0.0917248	0.0299103	0	0.00697906	0.0827517	0.256231	0.904287	0.792622	0.77667	0.912263	0.0229312	0.481555	0.0747757	0.134596	0	0.0757727	0.259222	0.60319	0.701894	0.596211	0.966102	0.922233	0.182453	0.0229312	0.848455	0.988036	0	0	0.517448	0.861416	0	0.0468594	0.338983	0.194417	0.860419	0	0.598205	0.237288	0.13659	0.914257	0.351944	0.0857428	0	0	0.119641	0.992024	0.00199402	0
M	ATG	0.927218	0.327019	0.000997009	0.123629	0.784646	0.667996	0.488534	0.0917248	0.0149551	0.317049	0.0987039	0.00897308	0.34995	0.325025	0	0.000997009	0.98006	0.5334	0.66002	0.0787637	0.384845	0.15653	0.788634	0.304088	0.675972	0.552343	0	0.000997009	0.378863	0.547358	0.0837488	0.437687	0.0199402	0.00199402	0.11665	0.00398804	0.421735	0.0777667	0.134596	0.551346	0.3001	0.428714	0.0269192	0.00299103	0.665005	0.00299103	0.000997009	0.00398804
N	AAC	0.832502	0.432702	0.0578265	0.546361	0.33998	0.905284	0.815553	0.0648056	0.800598	0.435693	0.15653	0.0837488	0.29013	0.981057	0.140578	0.601196	0.860419	0.977069	0.451645	0.0847458	0.691924	0.852443	0	0.181456	0.607178	0.827517	0	0.000997009	0.722832	0.885344	0.175474	0.351944	0.524427	0.64008	0.946162	0.251246	0.0518445	0.150548	0.473579	0.257228	0.0179462	0.00598205	0	0	0.270189	0.521436	0	0.0857428
N	AAT	0.995015	0.854437	0.71984	0.989033	0.554337	0.265204	0.114656	0.564307	0.962114	0.159521	0.366899	0.404786	0.706879	0.751745	0.0588235	0.788634	0.91326	0.811565	0.981057	0.976072	0.958126	0.807577	0.157527	0.51346	0.886341	0.104686	0	0	0.941176	0.681954	0.0239282	0.8335	0.976072	0.890329	0.154536	0.321037	0.447657	0.139581	0.561316	0.769691	0.00697906	0.65005	0	0	0.249252	0.721834	0.0159521	0.227318
K	AAA	0.60319	0.947159	0.784646	0.742772	0.302094	0.164506	0.774676	0.189432	0.790628	0.405783	0.817547	0.510469	0.910269	0.0239282	0.174477	0.286142	0.772682	0.245264	0.0997009	0.706879	0.355932	0.313061	0.949153	0.125623	0.45663	0.477567	0	0	0.969093	0.963111	0.0937188	0.716849	0.409771	0.238285	0.473579	0.197408	0.569292	0.512463	0.998006	0.926221	0.89332	0.0438684	0	0	0.385842	0.0518445	0.315055	0.000997009
K	AAG	0.942173	0.944167	0.571286	0.894317	0.633101	0.832502	0.848455	0.987039	0.998006	0.979063	0.738784	0.77667	0.686939	0.724826	0.962114	0.996012	0.590229	0.749751	0.729811	0.912263	0.922233	0.781655	0.805583	0.959123	0.272183	0.555334	0.0697906	0.240279	0.651047	0.928215	0.219342	0.8335	0.397807	0.587238	0.64008	0.99003	0.922233	0.740778	0.676969	0.221336	0.760718	0.49651	0.557328	0.331007	0.907278	0.721834	0.999003	0.216351
S	AGC	0.92323	0.957129	0.302094	0.911266	0.549352	0.854437	0.139581	0.677966	0.949153	0.97009	0.264207	0.307079	0.81655	0.361914	0.0149551	0.991027	0.918245	0.244267	0.579262	0.701894	0.872383	0.0189432	0.628116	0.610169	0.171486	0.284148	0.962114	0.518445	0.978066	0.90329	0.337986	0.578265	0.419741	0.81655	0.551346	0.0508475	0.983051	0.927218	0.397807	0.729811	0.925224	0.261216	0.0578265	0	0.274177	0.982054	0	0.691924
S	AGT	0.998006	0.827517	0.951147	0.85344	0.948156	0.774676	0.85344	0.982054	0.956132	0.878365	0.286142	0.676969	0.897308	0.366899	0.5334	0.727817	0.711864	0.904287	0.832502	0.896311	0.94317	0.994018	0.259222	0.653041	0.839482	0.720837	0.394816	0.101695	0.813559	0.685942	0.606181	0.998006	0.670987	0.706879	0.308076	0.422732	0.690927	0.403789	0.667996	0.230309	0.88335	0.708873	0.0907278	0.0837488	0.946162	0.453639	0.0358923	0.0697906
R	AGA	1	0.58325	0.864407	0.919242	0.754736	0.945165	0.159521	0.794616	0.997009	0.983051	0.767697	0.405783	0.984048	0.565304	0.557328	0.991027	0.984048	0.854437	0.429711	0.895314	0.697906	0.972084	0.850449	0.350947	0.895314	0.790628	0.211366	0.00997009	0.827517	0.798604	0.999003	0.362911	0.976072	0.0438684	0.989033	0.888335	0.926221	0.745763	0.568295	0.985045	0.957129	0.789631	0.191426	0.676969	0.762712	0.951147	0.0478564	0.254237
R	AGG	0.995015	0.866401	0.922233	0.999003	0.984048	0.664008	0.755733	0.920239	0.807577	0.811565	0.457627	0.00398804	0.178465	0.0329013	0.685942	0.0348953	0.803589	0.134596	0.0329013	0.206381	0.954138	0.448654	0.588235	0.880359	0.750748	0.613161	0.419741	0.178465	0.807577	0.79661	0.838485	0.742772	0.812562	0.0608175	0.62014	0.501496	0.84347	0.81655	0.0249252	0.804586	0.188435	0.345962	0.109671	0.000997009	0.844467	0.607178	0.696909	0.271186
A	GCC	0.95015	0.73679	0.410768	0.993021	0.747757	0.717846	0.66002	0.732802	0.235294	0.889332	0.139581	0.0159521	0.957129	0.130608	0.00797607	0.58325	0.967099	0.976072	0.202393	0.978066	0.546361	0.525424	0.238285	0.00897308	0.0279163	0.271186	0.308076	0	0.984048	0.994018	0.11665	0.0488534	0.633101	0.0269192	0.733799	0.371884	0.774676	0.111665	0.89332	0	0	0.0658026	0.0249252	0	0.797607	0.224327	0	0.103689
A	GCT	0.983051	0.211366	0.0857428	0.890329	0.909272	0.124626	0.527418	0.123629	0.164506	0.516451	0.114656	0.483549	0.0767697	0.362911	0.00398804	0.0558325	0.531406	0.835494	0.128614	0.206381	0.489531	0.845464	0.904287	0.435693	0.0289133	0.421735	0.272183	0.00299103	0.985045	0.906281	0.118644	0.0378863	0.859422	0.292124	0.227318	0.594217	0.0837488	0.24327	0.186441	0.177468	0	0	0	0.00299103	0.399801	0.0209372	0.0119641	0.0438684
A	GCA	0.465603	0.178465	0.627119	0.78664	0.133599	0.47657	0.587238	0.170489	0.0887338	0.182453	0.0149551	0.389831	0.0338983	0.439681	0.00598205	0.00199402	0.474576	0.925224	0.713858	0.779661	0.858425	0.734796	0.78664	0.0219342	0.493519	0.28016	0.172483	0	0.74676	0.0747757	0.788634	0.878365	0.383848	0.0279163	0.0648056	0.000997009	0.405783	0.492522	0	0.226321	0.0518445	0.000997009	0	0.0309073	0.444666	0.0677966	0.120638	0.00498504
A	GCG	0.884347	0.00498504	0.549352	0.99003	0.564307	0.165503	0.932203	0.190429	0.92323	0.137587	0.25324	0.627119	0.145563	0.353938	0	0.0488534	0.454636	0.0159521	0.178465	0.981057	0.96012	0.186441	0.249252	0.377866	0.795613	0.000997009	0.988036	0.632104	0.989033	0.982054	0.850449	0.763709	1	0.0498504	0.441675	0.314058	0.0329013	0.73679	0.0947159	0.0947159	0.336989	0.0259222	0.00199402	0.0249252	0.177468	0.944167	0.0697906	0.0767697
V	GTC	0.474576	0.808574	0.227318	0.670987	0.7667	0.54337	0.186441	0.587238	0.134596	0.744766	0.463609	0.0458624	0.56331	0.813559	0.0289133	0.0667996	0.52343	0.37986	0.909272	0.740778	0.728814	0.991027	0.728814	0	0.568295	0.968096	0.115653	0.000997009	0.940179	0.394816	0.000997009	0.368893	0.0199402	0.218345	0.384845	0.00498504	0.584247	0.00797607	0.382851	0.425723	0.0249252	0.0977069	0.198405	0.00299103	0.854437	0.00797607	0.00498504	0.281157
V	GTT	0.754736	0.12662	0.797607	0.0957129	0.791625	0.45663	0.951147	0.885344	0.511466	0.765703	0.866401	0.0927218	0.114656	0.145563	0.0169492	0.0219342	0.681954	0.251246	0.65005	0.510469	0.810568	0.694915	0.358923	0.222333	0.702891	0.0219342	0.000997009	0	0.622134	0.478564	0	0.0628116	0.779661	0.637089	0.473579	0.131605	0.904287	0.811565	0.226321	0.880359	0.0139581	0.0299103	0.0259222	0	0.499501	0.688933	0.000997009	0.277168
V	GTA	0.135593	0.235294	0.0897308	0.690927	0.392822	0.925224	0.939182	0.415753	0.488534	0.908275	0.343968	0.477567	0.237288	0.852443	0	0.0528415	0.0628116	0.395813	0.658026	0.627119	0.820538	0.482552	0.478564	0.381854	0.282154	0.271186	0	0	0.895314	0.65005	0.0528415	0.294118	0.542373	0.128614	0.00997009	0.141575	0.130608	0.128614	0.481555	0.901296	0.337986	0.340977	0	0	0.140578	0.458624	0.000997009	0
V	GTG	0.462612	0.621137	0.230309	0.143569	0.393819	0.799601	0.84347	0.732802	0.704885	0.724826	0.00598205	0.455633	0.120638	0.311067	0.239282	0.0149551	0.912263	0.959123	0.115653	0.0797607	0.578265	0.661017	0.385842	0.132602	0.974078	0.0817547	0.0787637	0.000997009	0.894317	0.979063	0	0.0149551	0.732802	0.150548	0.184447	0.0628116	0.467597	0.00498504	0.0279163	0.661017	0.0199402	0	0.00897308	0	0.367896	0.724826	0.0478564	0.0129611
D	GAC	0.79661	0.89332	0.904287	0.800598	0.686939	0.910269	0.96012	0.898305	0.684945	0.510469	0.257228	0.226321	0.937188	0.802592	0.220339	0.765703	0.998006	0.815553	0.92323	0.982054	0.552343	0.953141	0.811565	0.411765	0.470588	0.847458	0.00498504	0.26321	0.901296	0.965105	0.158524	0.305085	0.601196	0.0289133	0.0309073	0.549352	0.227318	0.122632	0.987039	0.657029	0.0259222	0.143569	0.706879	0.140578	0.361914	0.629113	0.3001	0.976072
D	GAT	0.724826	0.601196	0.991027	0.551346	0.226321	0.231306	0.846461	0.976072	0.819541	0.340977	0.277168	0.856431	0.686939	0.507478	0.840479	0.348953	0.588235	0.617149	0.323031	0.94317	0.800598	0.0249252	0.918245	0.353938	0.333001	0.694915	0.00697906	0.00398804	0.9332	0.433699	0.00498504	0.0358923	0.725823	0.961117	0.463609	0.948156	0.850449	0.657029	0.0279163	0.780658	0.945165	0.332004	0	0.251246	0.389831	0.646062	0.220339	0.235294
E	GAA	0.88335	0.707876	0.844467	0.692921	0.817547	0.535394	0.900299	0.351944	0.753739	0.959123	0.963111	0.896311	0.31007	0.899302	0.869392	0.832502	0.654038	0.197408	0.152542	0.824526	0.841476	0.976072	0.703888	0.810568	0.772682	0.878365	0	0.0119641	0.482552	0.961117	0.8335	0.152542	0.688933	0.249252	0.862413	0.84347	0.185444	0.686939	0.715852	0.377866	0.771685	0.340977	0.148554	0.0677966	0.165503	0.304088	0.585244	0.340977
E	GAG	0.969093	1	0.858425	0.963111	0.892323	0.728814	0.924227	0.947159	0.936191	0.741775	0.722832	0.997009	0.942173	0.98006	0.610169	0.999003	0.966102	0.258225	0.929212	0.999003	0.988036	0.550349	0.941176	0.612164	0.841476	0.907278	0.110668	0.0438684	0.520439	0.759721	0.998006	0.68993	0.4666	0.763709	0.29013	0.452642	0.875374	0.992024	0.81655	0.901296	0.64008	0.12662	0.940179	0.0967099	0.764706	0.995015	0.925224	0.696909
G	GGC	0.878365	0.792622	0.179462	0.847458	0.68993	0.372881	0.909272	0.401795	0.103689	0.172483	0.413759	0.691924	0.289133	0.953141	0.00997009	0.218345	0.261216	0.26321	0.207378	0.236291	0.491525	0.983051	0.986042	0.0448654	0.0388833	0.0468594	0.356929	0.998006	0.651047	0.169492	1	0.251246	0.19342	0.624128	0.804586	0.884347	0.609172	0.441675	0.107677	0.566301	0.00199402	0.0368893	0.19342	0.0109671	0.0229312	0.425723	0.0159521	0.0149551
G	GGT	0.974078	0.368893	0.0129611	0.934197	0.63011	0.800598	0.995015	0.654038	0.333998	0.514457	0.902293	0.161515	0.878365	0.291127	0.0488534	0.722832	0.928215	0.378863	0.801595	0.455633	0.158524	0.274177	0.901296	0.364905	0.755733	0.0648056	0.749751	0.00598205	0.956132	0.515454	0.326022	0.911266	0.247258	0.0568295	0.149551	0.0667996	0.309073	0.31007	0.00997009	0.687936	0.0338983	0.531406	0.123629	0.00498504	0.0797607	0.298106	0.604187	0.26321
G	GGA	0.95015	0.714855	0.510469	0.819541	0.670987	0.66002	0.996012	0.815553	0.164506	0.0677966	0.654038	0.511466	0.87338	0.875374	0.00498504	0.147557	0.294118	0.00598205	0.289133	0.849452	0.358923	0.267198	0.90329	0.434696	0.214357	0.68993	0.905284	0.345962	0.41675	0.94317	0.0518445	0.714855	0.0388833	0.993021	0.0957129	0.307079	0.973081	0.0827517	0.152542	0.154536	0	0.638086	0.00897308	0.749751	0.130608	0.731805	0.00199402	0.0289133
G	GGG	0.928215	0.824526	0.0418744	0.890329	0.92323	0.823529	0.266201	0.297109	0.234297	0.868395	0.103689	0.312064	0.932203	0.976072	0.256231	0.00398804	0.347956	0.104686	0.294118	0.230309	0.708873	0.707876	0.794616	0.0628116	0.155533	0.974078	0.132602	0.987039	1	0.955135	0.635095	0.195414	0.0578265	0.225324	0.179462	0.892323	0.324028	0.99003	0.175474	0.860419	0.0917248	0.0767697	0	0.0338983	0.0398804	0.905284	0.000997009	0.0667996
[truncated: 214 more columns]

## Sheet: Aminoacid heatmap
Stop efficiency at the corresponging amino acid residue in the -2nd position while mRNA codon with specified index number is located in the P-site												Stop efficiency at the corresponging amino acid residue in the E-site while mRNA codon with specified index number is located in the P-site												Stop efficiency at the corresponging amino acid residue in the P-site while mRNA codon with specified index number is located in the P-site												Stop efficiency at the corresponging amino acid residue in the A-site while mRNA codon with specified index number is located in the P-site												Stop efficiency at the corresponging amino acid residue in the 2nd position while mRNA codon with specified index number is located in the P-site
-2	Index number of mRNA codon located in the P-site											E	Index number of mRNA codon located in the P-site											P	Index number of mRNA codon located in the P-site											A	Index number of mRNA codon located in the P-site											2	Index number of mRNA codon located in the P-site
	4	5	6	7	8	9	10	11	12	13			3	4	5	6	7	8	9	10	11	12			2	3	4	5	6	7	8	9	10	11			1	2	3	4	5	6	7	8	9	10			1
W	0.106184	0.0125787	0.00504898	-0.01125	-0.0106806	-0.0072944	-0.0121161	-0.0015701	-0.00590732	-0.0121669		W	0.0263149	0.139188	0.0335047	0.0119981	-0.00374694	-0.00411098	-0.0101654	0.00123746	-0.0138238	-0.00636052		W	0.0188069	0.0459449	0.0737345	0.0159776	-0.000756284	-0.0151513	-0.0185404	-0.00409468	-0.0116576	0.00850318		W	0.0459543	0.0169379	0.0706747	0.0772754	0.00834261	0.00187354	-0.0142778	-0.012253	-0.0137597	-0.0167193		W	0.0190443
Y	0.123277	0.0300711	0.00786711	-0.00961585	-0.00670213	-0.0109133	-0.0114535	-0.000446226	-0.0141501	-0.00946021		Y	0.0317111	0.126115	0.0528466	0.0155356	-0.0148632	-0.0126881	-0.0180954	-0.0133911	-0.00865775	-0.0178377		Y	0.0501004	0.108323	0.159857	0.0395312	0.0151971	-0.0243548	-0.013204	-0.0154324	-0.00479363	-0.00209335		Y	0.0155495	0.00627572	0.0193873	0.0930237	0.0435533	0.0059138	-0.0132611	-0.0267185	-0.0120809	-0.0133847		Y	0.0154017
F	0.0818325	0.0190488	0.000220325	-0.0172591	-0.00907386	-0.0149922	-0.0132323	0.00214226	-0.0112999	-0.0127425		F	0.0367062	0.0950006	0.0532784	0.0124408	-0.00856388	-0.00699841	-0.00798522	-0.0135366	-0.000858452	-0.0119717		F	0.0552196	0.108697	0.156755	0.0672038	0.00849104	-0.00185074	-0.00770246	0.000952087	-0.0132596	0.00507438		F	0.0155926	0.00288766	-0.0051727	0.0524652	0.0361352	0.00864265	-0.00943937	-0.0158496	-0.0150241	-0.0163191		F	0.0209188
I	0.11673	0.0432952	-0.00467506	-0.0104581	-0.0111886	-0.0100736	-0.00290453	-0.0173314	-0.0115751	-0.0165661		I	0.127808	0.15207	0.0645435	0.0190987	-0.000804481	0.00315266	-0.00135041	-0.00188222	0.0268845	-0.0106204		I	0.0317058	0.0756942	0.19565	0.0699092	0.0274795	0.00103599	-0.00445814	-0.0062165	-0.00453873	0.0170016		I	-0.0170128	0.00512026	0.0369498	0.104529	0.0489066	0.000522082	-0.0149232	-0.0204576	-0.00917588	-0.017671		I	0.00365986
L	0.0886731	0.0384866	-0.00094664	-0.0128367	-0.016808	-0.00995975	-0.0139334	-0.00859748	-0.0127238	-0.0157435		L	0.0468109	0.0970376	0.0318414	0.00126184	-0.00890813	-0.0165656	-0.0141465	-0.0113488	0.0102028	-0.0124494		L	0.0250083	0.0473894	0.0869309	0.0293245	2.43672e-06	-0.0163081	-0.0161731	-0.0115314	-0.0133343	-0.0191974		L	0.0165472	0.0060165	0.0354192	0.0748488	0.0270993	-0.00211969	-0.0192733	-0.0207554	-0.0173521	-0.0207575		L	0.025232
V	0.101859	0.0312153	0.00698387	-0.0157284	-0.0135027	-0.0135323	-0.0149596	-0.0104173	-0.0165972	-0.0133511		V	0.0770007	0.114354	0.061325	0.021436	-0.00366168	-0.00586152	-0.00106297	-0.00398549	0.0119929	-0.0115169		V	0.0110174	0.0388699	0.0971616	0.0566779	0.0210983	-0.00501265	-0.0108069	-0.00712356	-0.0134462	-0.00296488		V	0.00694926	0.00709778	0.00854518	0.0610947	0.0360977	0.0151982	-0.0125528	-0.0140562	-0.00875694	-0.0109847		V	0.0313113
M	0.117838	0.058512	0.00786598	0.00147599	-0.0140698	-0.00240452	-0.0152697	0.0138521	-0.0130199	-0.0168014		M	0.0434561	0.142252	0.0680777	0.016397	-0.011865	-0.0107083	-0.00304361	-0.00995805	0.0169584	-0.0100939		M	0.030091	0.0439092	0.15104	0.0559176	0.0132358	-0.0146926	-0.011829	-0.00925447	0.00127443	0.00981603		M	0.0078738	-0.00882782	0.0355164	0.0968086	0.027655	0.0155363	-0.00608661	-0.0191466	-0.0140947	-0.0191745		M	0.0141345
A	0.045195	0.0303553	0.00323521	-0.0130874	-0.0202808	-0.01703	-0.0168413	-0.021027	-0.0139025	-0.0116158		A	0.0188781	0.0749595	0.0302697	0.0102468	-0.0160604	-0.0224516	-0.0163369	-0.0166428	-0.0251227	-0.0122505		A	0.0239246	0.0361775	0.0889994	0.0432812	0.0039989	-0.0127263	-0.0161131	-0.0134562	-0.0136382	-0.0077516		A	0.0428203	0.0174373	0.0136395	0.0447332	0.0229644	0.00130858	-0.0117568	-0.0181406	-0.0151875	-0.0156208		A	0.026716
T	0.119765	0.0365245	0.00796892	-0.0212853	-0.0175957	-0.0159921	-0.0198532	-0.0213954	-0.0112194	-0.0111291		T	0.0394601	0.0915931	0.0452441	0.0126525	-0.015115	-0.01659	-0.0135863	-0.0123808	-0.00912615	-0.0122206		T	0.00956506	0.0420429	0.0828375	0.0279685	-0.00558389	-0.0161999	-0.0190563	-0.011085	-0.0148904	-0.0075688		T	0.0396792	0.0370143	0.0336895	0.0894628	0.0313829	0.00109633	-0.0161738	-0.0241707	-0.0178992	-0.0141942		T	0.0259633
S	0.0606149	0.0221331	0.00548031	-0.0156653	-0.0209107	-0.0153808	-0.0180838	-0.025368	-0.0117408	-0.0115045		S	0.0177466	0.0541872	0.0213642	-0.0040434	-0.0195381	-0.0200868	-0.015542	-0.0185474	-0.019293	-0.0134443		S	0.0236741	0.0398286	0.0674162	0.0203227	-0.00255872	-0.0124327	-0.0171495	-0.0168578	-0.0165377	-0.019562		S	0.0442306	0.0244806	0.0245904	0.0725566	0.0250166	0.00337523	-0.012021	-0.0230206	-0.0164005	-0.0210564		S	0.0310461
G	0.0268595	0.0344021	0.0101874	-0.0122775	-0.0225573	-0.0159424	-0.0175486	-0.0223545	-0.00941846	-0.00930258		G	0.0117647	0.0415995	0.0195574	0.00105986	-0.0157848	-0.0233212	-0.0192469	-0.019668	-0.018437	-0.00583737		G	0.0104738	0.024608	0.0805031	0.0419932	0.0167464	-0.00622894	-0.0171621	-0.0147511	-0.0109074	-0.0157949		G	0.023005	0.00513229	0.00970008	0.0547268	0.0254214	0.00504814	-0.0142631	-0.015912	-0.0127831	-0.0144788		G	0.0316519
P	0.0748269	0.00830674	-0.00152898	-0.00900405	-0.0103678	-0.0106363	-0.00948441	0.00394818	-0.0141276	-0.0122548		P	0.0286211	0.0424039	0.0100058	-0.00964708	-0.0264679	-0.0280204	-0.02776	-0.0266494	-0.0298605	-0.0167936		P	0.0167696	0.0206071	0.0711146	-0.0036487	-0.0149703	-0.0402607	-0.0367147	-0.031273	-0.0294039	-0.0378161		P	0.0272403	0.023028	0.0280303	0.0649312	0.0141178	-0.00300008	-0.0255578	-0.02585	-0.0229123	-0.0208725		P	0.027855
Q	0.0945123	0.0490854	0.0128878	-0.016732	-0.0191297	-0.0153469	-0.0221696	-0.0190683	-0.0060609	-0.0173316		Q	0.0616854	0.142195	0.0507527	-0.00768965	-0.0180706	-0.0199806	-0.00795753	-0.0065833	-0.00502318	-0.0146116		Q	0.0344999	0.0401554	0.0945252	0.0287292	0.00170739	-0.0188133	-0.0154907	-0.0123555	-0.0127696	-0.00315446		Q	0.0165949	0.0100718	0.0447777	0.124334	0.0433405	0.00424506	-0.0115003	-0.0136219	-0.00777997	-0.0138271		Q	0.0232634
N	0.0873703	0.0473766	-0.00334395	-0.0176507	-0.0254902	-0.0210033	-0.0107692	-0.025209	-0.0155698	-0.0157231		N	0.0525985	0.0903457	0.0333953	-0.00160272	-0.0139379	-0.016628	-0.0154127	-0.011028	-0.0053273	-0.0133561		N	0.0290145	0.0487773	0.1303	0.0337733	-0.00659096	-0.0179569	-0.0145238	-0.00503869	-0.0174473	-0.0135457		N	0.0197437	0.0321298	0.0721122	0.172539	0.0596456	0.0104989	-0.0174714	-0.0162302	-0.0162866	-0.0231326		N	0.0235069
H	0.149801	0.0322707	-0.000172876	-0.0140502	-0.022984	-0.0143476	-0.0182581	-0.0219637	-0.0119435	-0.0105056		H	0.0397659	0.104433	0.0493283	0.00110932	-0.0151171	-0.0172772	-0.0099161	-0.0116154	-0.0202587	-0.0117591		H	0.03156	0.0955522	0.105774	0.0244528	0.00388348	-0.0139607	-0.0192054	-0.0132926	-0.0106003	-0.0191367		H	0.00830032	0.00165112	0.0261507	0.101668	0.0362025	0.00557233	-0.0134099	-0.0162145	-0.0150387	-0.0143665		H	0.013831
C	0.103127	0.0373698	0.0166747	-0.0144568	-0.0172767	-0.0112134	-0.0145731	-0.0101034	-0.0135446	-0.0114687		C	0.0262323	0.0822248	0.0302695	0.00646866	-0.00708765	-0.011832	-0.00952227	-0.01282	-0.0141167	-0.00915442		C	0.0221656	0.0358844	0.127432	0.0565661	0.014956	-0.0111781	-0.0166031	-0.0104445	-0.0110499	0.00334521		C	0.024197	0.00476725	0.00838016	0.0379369	0.00733334	-0.00632196	-0.024655	-0.0238725	-0.0216949	-0.0187987		C	0.0310326
K	0.141811	0.037426	-0.0192886	-0.025387	-0.0214843	-0.0216471	-0.0151983	-0.0260727	-0.00789	-0.0165302		K	0.081337	0.101287	-0.00875274	-0.00534426	-0.0231313	-0.0184567	-0.0101957	-0.0138097	-0.00998054	-0.00883705		K	0.0353939	0.0727542	0.035211	0.012244	-0.00342621	-0.0107661	-0.0162023	-0.0149471	-0.0148093	-0.0298433		K	-0.0082412	0.0442934	0.23153	0.203849	0.0647393	0.0140266	-0.0147288	-0.00542038	0.000648825	-0.00581861		K	0.0249721
R	0.0963862	0.020892	-0.00631574	-0.0211553	-0.0250602	-0.0196726	-0.0166914	-0.0238736	-0.0149928	-0.0123392		R	0.0574731	0.0964465	0.018416	-0.00167352	-0.0125788	-0.0151093	-0.0114446	-0.0130066	-0.0207969	-0.0172333		R	0.0150731	0.0291124	0.0582827	0.0231528	0.00332125	-0.0123783	-0.0166065	-0.0120197	-0.0162386	-0.0175639		R	0.0283222	0.0181176	0.0834607	0.0868955	0.0276889	-0.000693546	-0.0151079	-0.0137344	-0.00991623	-0.0105734		R	0.0427885
E	0.0440311	0.023308	-0.00920415	-0.0218148	-0.0168786	-0.0152328	-0.0147011	-0.0172181	-0.0102876	-0.0146736		E	0.0408189	0.0718517	0.00649883	-0.00746936	-0.0199141	-0.0222938	-0.0158491	-0.0175838	-0.0207835	-0.00359756		E	0.00704966	0.0271348	0.0188412	0.00289468	-0.00547742	-0.00515465	-0.01555	-0.0130119	-0.0114158	-0.00963647		E	0.0459175	0.0376426	0.109739	0.190476	0.0640163	0.0195791	0.00360367	-0.00801823	-0.00558475	-0.00690359		E	0.02407
D	0.0215156	0.0162581	0.00205754	-0.0347122	-0.0184426	-0.0181415	-0.0167625	-0.0167981	-0.00596663	-0.00863407		D	0.0257675	0.0617022	0.0100615	-0.0185718	-0.0263469	-0.0208906	-0.0175696	-0.0193325	-0.021067	-0.0163043		D	0.0347912	0.0355531	0.0440532	0.00927171	0.00190792	-0.0135896	-0.0156111	-0.0146861	-0.0120917	-0.026091		D	0.0443778	0.0330198	0.0609381	0.207299	0.0719188	0.00861039	-0.0160521	-0.0103294	-0.0114153	-0.00701469		D	0.0224746
*	0	0	0	0	0	0	0	0	0	0		*	0	0	0	0	0	0	0	0	0	0		*	0	0	0	0	0	0	0	0	0	0		*	0.036847	0.169319	0.121607	0.185908	0.0271272	-0.0296431	-0.0349407	-0.0180142	-0.0291405	-0.0149816		*	-0.0505767
[truncated: 8 more columns]

## Sheet: P-value for aminoacid heatmap
P-value for shuffled datasets exceeding experimental data of stop efficiency at the corresponging amino acid residue in the -2nd position while mRNA codon with specified index number is located in the P-site												P-value for shuffled datasets exceeding experimental data of stop efficiency at the corresponging amino acid residue in the E-site while mRNA codon with specified index number is located in the P-site												P-value for shuffled datasets exceeding experimental data of stop efficiency at the corresponging amino acid residue in the P-site while mRNA codon with specified index number is located in the P-site												P-value for shuffled datasets exceeding experimental data of stop efficiency at the corresponging amino acid residue in the A-site while mRNA codon with specified index number is located in the P-site												P-value for shuffled datasets exceeding experimental data of stop efficiency at the corresponging amino acid residue in the 2nd position while mRNA codon with specified index number is located in the P-site
-2	Index number of mRNA codon located in the P-site											E	Index number of mRNA codon located in the P-site											P	Index number of mRNA codon located in the P-site											A	Index number of mRNA codon located in the P-site											2	Index number of mRNA codon located in the P-site
	4	5	6	7	8	9	10	11	12	13			3	4	5	6	7	8	9	10	11	12			2	3	4	5	6	7	8	9	10	11			1	2	3	4	5	6	7	8	9	10			1
W	0	0.991036	0.285857	0.243028	0.0268924	0.0119522	0.250996	0.000996016	0.0458167	0.539841		W	0.992032	0	0.14741	0.0308765	0.0219124	0	0.0866534	0	0.438247	0.0488048		W	0.671315	0.12749	0.895418	0.984064	0.689243	0.461155	0.493028	0	0.169323	0		W	0	0.777888	0	0.825697	1	0.523904	0.425299	0.0199203	0.338645	0.574701		W	0.913347
Y	0	0.061753	0.108566	0.133466	0	0.217131	0.190239	0.00398406	0.682271	0.134462		Y	0.935259	0	0	0.00896414	0.478088	0.0727092	0.843625	0.303785	0.124502	0.933267		Y	0	0	0	0.0368526	0.0189243	0.919323	0.0657371	0.545817	0.00298805	0		Y	0.950199	0.999004	1	0.139442	0.0159363	0.266932	0.350598	0.9751	0.191235	0.268924		Y	0.99004
F	0	0.865538	0.631474	0.696215	0.00298805	0.692231	0.318725	0	0.370518	0.630478		F	0	0.00199203	0	0.00796813	0.0856574	0	0.0239044	0.307769	0.000996016	0.409363		F	0	0	0	0	0.0816733	0.00697211	0.000996016	0	0.267928	0		F	0.991036	0.999004	1	1	0.0976096	0.119522	0.14741	0.201195	0.477092	0.554781		F	0.825697
I	0	0	0.925299	0.162351	0.00996016	0.0717131	0	0.726096	0.38247	0.949203		I	0	0	0	0	0	0	0	0	0	0.268924		I	0.00199203	0	0	0	0	0	0	0.00199203	0.000996016	0		I	1	1	0.810757	0	0.000996016	0.598606	0.410359	0.693227	0.0149402	0.683267		I	1
L	0	0	0.850598	0.185259	0.315737	0.000996016	0.285857	0.000996016	0.594622	1		L	0	0	0.0836653	0.609562	0.00498008	0.153386	0.334661	0.0119522	0	0.464143		L	0.0129482	0.00298805	0.0966135	0.37251	0.766932	0.596614	0.0996016	0.0139442	0.105578	0.983068		L	1	1	0.982072	1	0.776892	0.953187	0.864542	0.88745	0.901394	0.999004		L	0.601594
V	0	0.0358566	0.0348606	0.609562	0.0179283	0.26992	0.447211	0.061753	0.989044	0.818725		V	0	0	0	0	0	0	0	0	0	0.273904		V	0.998008	0.680279	0	0	0	0	0	0	0.156375	0		V	1	1	1	1	0.0278884	0	0.13247	0.00796813	0	0.0109562		V	0.0338645
M	0.000996016	0	0.148406	0.0109562	0.260956	0.0059761	0.497012	0	0.546813	0.86753		M	0.393426	0	0	0.0189243	0.319721	0.0737052	0	0.209163	0.000996016	0.327689		M	0.114542	0.308765	0	0	0.060757	0.437251	0.0776892	0.151394	0.00199203	0.000996016		M	0.987052	1	0.777888	0.0986056	0.561753	0.0388446	0.0866534	0.5	0.415339	0.716135		M	0.928287
A	1	0.138446	0.283865	0.196215	0.960159	0.965139	0.880478	0.999004	0.865538	0.345618		A	1	0.984064	0.213147	0	0.587649	1	0.888446	0.819721	1	0.401394		A	0.135458	0.972112	0.0249004	0	0.154382	0.0986056	0.0258964	0.0996016	0.0677291	0		A	0	0.947211	1	1	0.997012	0.63247	0.0288845	0.320717	0.48506	0.443227		A	0.366534
T	0	0.00298805	0.0209163	0.994024	0.454183	0.824701	0.999004	0.992032	0.281873	0.273904		T	0.729084	0.00796813	0	0	0.458167	0.200199	0.275896	0.064741	0.00996016	0.469124		T	1	0.318725	0.438247	0.51992	0.998008	0.550797	0.72012	0.0149402	0.379482	0.0059761		T	0	0	0.991036	0.0966135	0.208167	0.626494	0.527888	0.998008	0.944223	0.252988		T	0.463147
S	1	0.973108	0.0507968	0.629482	0.996016	0.760956	0.976096	1	0.311753	0.309761		S	1	1	0.994024	0.997012	0.958167	0.922311	0.73506	0.973108	0.988048	0.689243		S	0.14243	0.494024	1	1	0.969124	0.0866534	0.198207	0.908367	0.716135	0.986056		S	0	0.111554	1	1	0.940239	0.291833	0.0657371	0.994024	0.797809	0.999004		S	0.0278884
G	1	0.00298805	0	0.121514	0.999004	0.833665	0.918327	1	0.0119522	0.00199203		G	1	1	1	0.663347	0.555777	1	1	0.993028	0.961155	0		G	1	1	0.757968	0	0	0	0.193227	0.439243	0.000996016	0.677291		G	0.884462	1	1	1	0.914343	0.0786853	0.252988	0.0219124	0.0298805	0.207171		G	0.0059761
P	1	1	0.976096	0	0	0.000996016	0	0	0.929283	0.608566		P	1	1	1	1	1	1	1	1	1	0.998008		P	0.987052	1	1	1	1	1	1	1	1	1		P	0.241036	0.199203	1	1	1	0.999004	1	1	1	1		P	0.148406
Q	0.0667331	0	0.00498008	0.662351	0.665339	0.656375	0.994024	0.876494	0.0219124	0.984064		Q	0	0	0	0.988048	0.726096	0.768924	0.00298805	0.000996016	0.0149402	0.770916		Q	0.00697211	0.523904	0.0129482	0.473108	0.528884	0.781873	0.141434	0.139442	0.199203	0.000996016		Q	0.971116	0.997012	0.209163	0	0.000996016	0.273904	0.164343	0.0229084	0.00996016	0.270916		Q	0.74004
N	0.323705	0	0.884462	0.714143	0.996016	0.983068	0.104582	0.968127	0.792829	0.863546		N	0.0179283	0.0468127	0.0856574	0.756972	0.36255	0.356574	0.604582	0.182271	0.0408367	0.570717		N	0.0707171	0.0388446	0	0.160359	0.950199	0.669323	0.118526	0.00199203	0.678287	0.388446		N	0.88247	0.00697211	0	0	0	0.0587649	0.61753	0.272908	0.599602	0.942231		N	0.709163
H	0	0.0697211	0.724104	0.405378	0.989044	0.537849	0.89243	0.993028	0.454183	0.193227		H	0.650398	0	0	0.581673	0.469124	0.36255	0.0109562	0.0816733	0.939243	0.346614		H	0.00498008	0	0	0.823705	0.301793	0.34761	0.658367	0.25498	0.0517928	0.88247		H	1	1	1	0	0.0428287	0.164343	0.246016	0.129482	0.453187	0.303785		H	1
C	0	0.0189243	0	0.435259	0.478088	0.121514	0.427291	0.12749	0.660359	0.389442		C	0.99004	0.366534	0.253984	0.134462	0.0388446	0.0129482	0.0219124	0.203187	0.435259	0.0856574		C	0.396414	0.792829	0	0	0.000996016	0.155378	0.241036	0.0239044	0.0717131	0		C	0.655378	0.998008	1	1	1	0.960159	0.956175	0.973108	0.988048	0.859562		C	0.160359
K	0	0.0129482	1	0.971116	0.884462	0.982072	0.572709	0.974104	0.166335	0.864542		K	0	0	1	0.90239	0.917331	0.546813	0.0816733	0.403386	0.224104	0.238048		K	0.00199203	0	1	0.99502	0.868526	0.206175	0.275896	0.493028	0.473108	0.984064		K	1	0	0	0	0	0.0219124	0.409363	0.000996016	0	0.0398406		K	0.569721
R	0	0.999004	1	0.999004	1	1	0.855578	1	0.981076	0.62251		R	0	0	1	0.97012	0.0826693	0.00398406	0.00199203	0.0458167	0.999004	1		R	0.998008	1	1	0.993028	0.239044	0.0488048	0.0717131	0.00697211	0.681275	0.930279		R	0.111554	0.915339	0	0.14243	0.719124	0.917331	0.314741	0	0	0		R	0
E	1	0.746016	0.992032	0.944223	0.417331	0.635458	0.441235	0.731076	0.275896	0.817729		E	0.562749	0.874502	1	0.979084	0.802789	0.938247	0.644422	0.746016	0.906375	0.00996016		E	0.998008	0.99502	1	1	0.934263	0.0119522	0.185259	0.283865	0.138446	0.115538		E	0	0	0	0	0	0	0	0	0	0.0059761		E	0.638446
D	1	0.992032	0.499004	1	0.611554	0.917331	0.684263	0.712151	0.00896414	0.0478088		D	0.999004	0.999004	1	1	0.987052	0.849602	0.869522	0.86753	0.944223	0.88745		D	0.00398406	0.826693	1	0.999004	0.486056	0.373506	0.134462	0.464143	0.138446	0.998008		D	0	0.00697211	0	0	0	0.0727092	0.508964	0.00298805	0.0846614	0.000996016		D	0.793825
*	1	1	0.636454	0.000996016	0	0	0	0.000996016	0	0		*	1	1	1	0.660359	0.00398406	0	0	0	0	0		*	1	1	1	1	0.644422	0	0	0	0	0.00199203		*	0.0109562	0	0	0	0.610558	1	1	0.438247	1	0.423307		*	1
[truncated: 8 more columns]

## Sheet: Heatmap for aminoacids in sites
Stop efficiency at the corresponging amino acid residue while located in the ribosome sites							P-values for shuffled datasets exceeding experimental data of stop efficiency at the corresponging triplet while located in the ribosome sites
	Ribosome sites							Ribosome sites
	-2	E	P	A	2			-2	E	P	A	2
W	0.00894379	0.0205784	0.0134239	0.0195408	0.0221935		W	0	0	0.199203	0.0498008	0.0956175
Y	0.0130618	0.0248107	0.0421157	0.0124299	0.0181324		Y	0	0	0	0.969124	0.48506
F	0.00695065	0.0184387	0.0439263	0.00743805	0.0190226		F	0	0	0	1	0.51992
I	0.0189803	0.0493294	0.0436289	0.0126422	0.0174366		I	0	0	0	1	0.962151
L	0.00505236	0.013516	0.0115825	0.00852187	0.0180027		L	0	0	0.00498008	1	0.249004
V	0.00604564	0.0296472	0.020789	0.00917808	0.0130046		V	0	0	0	1	1
M	0.0172559	0.0290013	0.0338164	0.0153818	0.022176		M	0	0	0	0.864542	0.386454
A	-0.00367319	0.0020839	0.0129048	0.00772847	0.0122467		A	1	1	0	1	1
T	0.0034728	0.00932197	0.00730236	0.0159971	0.0226428		T	0.000996016	0	0.890438	0.0109562	0.000996016
S	-0.00253675	-0.00189928	0.00713831	0.0129017	0.0190454		S	1	1	1	0.988048	0.0368526
G	-0.00246543	-0.00158333	0.0126059	0.00794989	0.0160322		G	1	1	0.0478088	1	0.998008
P	0.00257207	-0.00812661	-0.00838779	0.00578371	0.0123583		P	0.0816733	1	1	1	1
Q	0.00439509	0.0211982	0.0152953	0.0210563	0.0264522		Q	0.00398406	0	0.00199203	0	0
N	0.00491734	0.0170079	0.0267951	0.0370058	0.0265293		N	0.443227	0.0059761	0	0	0.00796813
H	0.00557252	0.0128457	0.0209193	0.0123371	0.0206636		H	0	0	0	0.950199	0.00398406
C	0.00865176	0.00840358	0.0229939	5.37345e-05	0.0182313		C	0	0.0338645	0	1	0.321713
K	0.0129546	0.019001	0.0169299	0.0651014	0.0302545		K	0.00298805	0.0378486	0.861554	0	0.000996016
R	-0.00120817	0.00897196	0.00603111	0.0204257	0.0217044		R	1	0	1	0	0
E	-0.00422181	0.00459761	0.00163574	0.0508047	0.0190778		E	1	1	1	0	0.641434
D	-0.00723893	-0.00201651	0.00622346	0.0397525	0.0130505		D	1	1	1	0	1
*	0	0	0	0.0587775	-0.010478		*	1	1	1	0	1

## Sheet: 2D aminoacid heatmap
2-dimensional representation of stalling propensities with the corresponding aminio acid residue located in the P- and A-sites																							2-dimensional representation of stalling propensities with the corresponding aminio acid residue located in the E- and A-sites																							2-dimensional representation of stalling propensities with the corresponding aminio acid residue located in the E- and P-sites
P\A	Amino acid residues located in the A-site																						E\A	Amino acid residues located in the A-site																						E\P	Amino acid residues located in the P-site
	W	Y	F	I	L	V	M	A	T	S	G	P	Q	N	H	C	K	R	E	D	*			W	Y	F	I	L	V	M	A	T	S	G	P	Q	N	H	C	K	R	E	D	*			W	Y	F
W	0.00741888	0.0180287	0.00542873	-0.00918918	0.0116702	0.010335	-0.0204076	-0.00209151	0.0167001	0.00400265	0.0116745	0.00438492	0.017049	0.0345377	-0.000418795	-0.0120148	0.0829709	0.0257263	0.0807683	0.0429828	0.0661048		W	0.00614829	0.0525506	0.0244583	0.0212872	0.0149942	0.0334553	0.0667382	0.0251635	0.0277616	0.0442666	0.0308318	0.0248523	0.0223517	0.0582454	0.0320919	-0.00568985	0.0657528	0.0168727	0.0425497	0.0476416	0.0176299		W	0.0125789	0.0392953	0.0848286
Y	0.0919759	0.0477578	0.0347765	0.0550512	0.0299151	0.0311056	0.0352368	0.00995149	0.0276951	0.02018	0.0187498	0.0271095	0.0719666	0.152385	0.053353	0.0159079	0.171683	0.0450074	0.15483	0.0703763	0.180225		Y	0.0109143	0.0587407	0.00738949	0.0852	0.0377828	0.0237681	0.0144692	0.00897126	0.0326434	0.0242919	0.0213225	0.0120751	0.0635281	0.0576864	0.0290954	-0.00885287	0.0589382	0.0271645	0.170693	0.116416	0.12292		Y	0.0686098	0.0626313	0.0946042
F	0.0848856	0.0422058	0.0243122	0.0524022	0.0427811	0.0250112	0.0419269	0.0209573	0.0297633	0.0290312	0.0221898	0.0307401	0.0575898	0.0702509	0.0437268	0.0132363	0.159227	0.0662004	0.114785	0.139709	0.202911		F	0.0264411	0.0178184	-0.0032454	0.0622654	0.0246562	0.0203047	0.0129126	0.00902054	0.0214347	0.0199119	0.0195088	0.0119379	0.0199214	0.0834893	0.0309243	-0.00319247	0.0846142	0.0218418	0.122718	0.0797945	0.0632692		F	0.0295361	0.0804648	0.0399635
I	0.0480456	0.0208367	0.0205826	0.0529726	0.0275085	0.0284588	0.00975783	0.00803869	0.0394989	0.0177609	0.0290107	0.0416016	0.0438175	0.0716634	0.0184506	0.00891304	0.12878	0.0622723	0.135475	0.0579688	0.223477		I	0.0658202	0.0511819	0.0124331	0.0829664	0.0766544	0.0543921	0.0905226	0.0115647	0.0428554	0.0122084	0.0174267	0.0129431	0.115866	0.129403	0.0618046	0.0216539	0.234992	0.0669354	0.153344	0.146215	0.109577		I	0.0841422	0.197543	0.11084
L	0.0176615	-0.00955815	-0.000759834	0.0216369	0.0103664	0.016539	0.0156841	0.00351404	0.0181667	0.00613437	0.0090968	0.00786903	0.031079	0.0338404	0.0176672	-0.0040915	0.0953628	0.0143417	0.0623579	0.0512995	0.104352		L	0.0424766	0.0250602	0.00883216	0.0334136	0.0145563	0.0164115	0.0213294	-0.00241633	0.0166263	-0.000358911	0.00497672	2.0415e-05	0.037439	0.0581036	0.0183587	-0.000154847	0.129316	0.0326438	0.0700791	0.0732604	0.0601841		L	0.0202429	0.0819593	0.0727801
V	0.0328528	0.0167003	0.00389449	0.0261036	0.0135566	0.0174596	0.0049378	0.00856021	0.0286089	0.0146403	0.0127559	0.0165602	0.0297537	0.0590416	0.00803678	0.00212759	0.110521	0.0326465	0.064804	0.0587232	0.122378		V	0.05324	0.0325133	0.0191173	0.068259	0.0399215	0.0376762	0.0571501	0.0147614	0.040633	0.0195005	0.0194373	0.0154573	0.0545839	0.0736424	0.0410951	0.00616415	0.121163	0.059941	0.119579	0.0954127	0.0972477		V	0.0413161	0.0965145	0.0998478
M	0.0268584	0.0142018	0.0269146	0.047147	0.0160564	0.0157844	0.0169838	0.0173085	0.0590028	0.0157485	0.0145647	0.0206197	0.0563867	0.0385685	0.0449171	0.0151876	0.0901736	0.057668	0.0873715	0.0686164	0.136149		M	0.00486841	0.0424951	0.0442996	0.0275975	0.0145794	0.0299037	0.0440842	0.0176342	0.0136958	0.0228124	0.0125651	0.0197167	0.0599585	0.0138536	0.0171391	0.0129052	0.115064	0.0596547	0.149004	0.101418	0.0717514		M	0.0503623	0.0941497	0.0951793
A	0.0185442	0.0254615	0.00422811	0.0268402	0.0133923	0.0100227	0.0434873	0.00673952	0.0132159	0.0081625	0.00743556	0.00630595	0.023897	0.0536499	0.0134706	-0.00595413	0.0728257	0.0233271	0.0606653	0.0399074	0.036418		A	0.0138071	-0.00163309	0.00410882	0.00556452	0.00463355	0.00170929	0.0168977	0.000872554	0.0114439	0.00786779	0.00824444	0.00498364	0.0154826	0.0437289	0.0136442	-0.00134447	0.0214333	0.00603564	0.0238025	0.0270603	0.0371617		A	0.000894671	0.0131434	0.0163586
T	0.00371284	0.00426818	0.00151311	0.0122887	-0.00332016	0.00543026	-0.00922784	0.0010768	0.0030323	0.0022981	0.00420821	0.00184207	0.0193472	0.0303459	0.0117117	-0.00975411	0.0596701	0.0146916	0.0222924	0.0464706	0.0401758		T	0.0104613	0.0133638	0.00755439	0.00658229	0.00189306	0.00574703	0.0157084	0.00863342	0.00699399	0.0105166	0.00730839	0.00331355	0.0266418	0.0376476	0.0130265	-0.000315941	0.0856211	0.0211603	0.0418223	0.042424	0.0501016		T	0.0207324	0.0290438	0.0253708
S	0.00955976	0.0169226	0.00083032	0.00874373	0.00321031	0.0102979	0.015716	0.00189806	0.0129735	0.00257022	0.00867009	0.00274493	0.0167908	0.0335056	0.00601783	-0.00049553	0.0574285	0.0167489	0.048319	0.0271564	0.0155612		S	0.0105453	0.00643109	0.00293843	-0.00589322	-0.00513408	0.000311222	0.00349534	-0.000291793	0.00111902	0.00600248	0.00401064	-0.00451108	0.00679072	0.0128489	0.00670186	-0.0184691	0.0239175	0.00112276	0.023045	0.00738833	0.0165564		S	-0.00898024	0.0165231	0.00974738
G	0.0183164	0.0241732	0.0158896	0.0222883	0.00822393	0.00947883	0.0125236	0.0120302	0.0181294	0.0202324	0.0106377	0.00778343	0.0168577	0.0469024	0.0197763	0.00317251	0.0537682	0.0194781	0.034655	0.0435322	0.00909537		G	0.0132417	0.00019841	0.00265669	-0.00250982	-0.00249102	-0.000173807	0.0129549	0.00282969	0.00159684	0.00687397	0.00172259	-0.00914653	-0.000507634	0.0133711	0.00187964	-0.0104394	0.0123324	0.0016136	0.0115561	0.00889872	0.005127		G	-0.00126622	0.0035153	0.00886675
P	-0.00561121	-0.00372765	0.00345692	0.00253214	-0.00957683	-0.00345874	0.0240223	-0.00426755	8.55056e-05	0.00484481	-0.00528715	-0.0252831	0.00323965	0.0156383	0.00437061	-0.0192156	0.0131119	-0.00378221	0.01126	0.0127822	-0.0221686		P	-0.0173515	-0.00585982	0.00110297	0.0199665	-0.00456973	0.00388229	0.0105081	-0.00919598	-0.000852116	-0.00363293	-0.00949931	-0.0143732	0.00113061	0.0121965	-0.00412478	-0.00778343	0.0420398	-0.00248287	0.023522	0.010274	-0.0324085		P	0.00367838	0.0131773	0.0203707
Q	0.0209016	0.00635354	-0.0102289	0.0139081	0.00968016	0.00437357	0.00510672	-0.00128553	0.0117691	0.00625127	0.00151029	0.0102367	0.0177453	0.0348064	0.0174703	0.00260606	0.0775856	0.0364856	0.0500803	0.033865	0.093403		Q	0.0424762	0.0119274	-0.00444121	0.0448122	0.0209164	0.0158803	0.00547324	0.0105588	0.0229726	0.00828322	0.0151991	0.0251678	0.0436797	0.0585389	0.02076	0.00106736	0.0988368	0.0331252	0.103127	0.0658721	0.116156		Q	0.0111218	0.0493033	0.0778098
N	0.0127213	0.00687086	-0.00822929	0.0498538	0.0278436	0.0235041	0.0225919	0.00121722	0.01271	0.00801394	0.00799719	0.00879562	0.0390611	0.0694456	0.0128555	-0.00132012	0.134615	0.0315833	0.0784599	0.0463883	0.153534		N	0.0238601	0.0305988	0.0086937	0.0190312	0.00560176	0.0128372	-0.0119612	0.00808644	0.0148024	0.0157113	0.0203642	-3.01452e-05	0.0306183	0.0356536	0.0287931	-0.0094593	0.101423	0.022627	0.0667285	0.0635998	0.0753862		N	0.0396539	0.0376205	0.0842693
H	0.0247305	0.0139236	0.0101463	0.0328307	0.021231	0.0265341	0.0286996	0.00391766	0.0193634	0.0135703	0.000341268	0.0138911	0.056365	0.0428575	0.0306061	0.00161567	0.146645	0.0250977	0.112925	0.0768075	0.0994533		H	-0.000580349	0.0380632	0.00619843	0.0291626	0.0106607	0.0100694	0.0228979	0.00973886	0.0137355	0.00884877	0.0140946	0.0157201	0.0243804	0.0603089	0.0241295	0.00705571	0.0712914	0.0201024	0.0773385	0.0587312	0.0607637		H	0.000835321	0.0374969	0.0513027
C	0.022198	0.0112374	0.0178418	0.0226438	0.0178318	0.0117804	0.0527374	0.00831176	0.0141412	0.0202592	0.0192345	0.0171385	0.0180627	0.0393888	0.0328351	0.0112622	0.0895394	0.0390892	0.0809092	0.0691935	0.115811		C	0.0103995	0.010609	0.00865973	0.015355	0.00616298	0.0130993	0.0234793	0.0113723	0.0191271	0.00493099	0.00744616	0.011899	0.0234137	0.0373666	0.0170287	0.00676004	0.038409	0.00964874	0.0336969	0.0399444	0.0676678		C	0.00876336	0.025602	0.0474166
K	0.00827005	0.0256164	0.0101666	0.00161662	0.00581277	0.0144282	0.00784683	0.0147422	0.0193387	0.0115228	-0.00470535	0.00250509	0.00709835	0.0273629	-0.0013563	-0.00846871	0.0854657	0.0182826	0.0440337	0.0372825	0.109751		K	0.0219234	0.00974762	-0.0067182	0.00671355	0.00676816	0.0157938	0.00538967	-0.010505	0.00182919	0.0065294	-0.00419793	-0.00888057	0.0286488	0.0438861	0.0179284	-0.00784475	0.148369	0.0705158	0.0622268	0.0368148	0.0343634		K	-0.0108063	0.0627454	0.0854241
R	0.00674774	0.00740307	0.00382056	0.00928383	0.00514754	0.00408678	0.00244246	0.00315002	0.00764279	0.00583464	0.00124362	0.00614543	0.0157095	0.00325146	0.00391775	-0.00386789	0.0472578	0.019321	0.0385849	0.0172086	0.0250194		R	0.0209595	0.0162293	0.00981142	0.0141838	0.00754803	0.00431472	0.0141601	0.00190546	0.00562765	0.00679213	0.00589039	0.00507101	0.0212973	0.0289125	0.0114103	-0.00758164	0.137271	0.0413271	0.0591671	0.0333175	0.0471527		R	0.0191281	0.0305324	0.043037
E	0.0174596	-0.00734921	-0.0109928	0.00286864	-0.00430455	-0.00454028	0.00348006	-0.00263664	0.00712488	0.00351756	0.000487675	-0.00415938	-0.014019	0.0247025	-0.00507458	0.00479477	0.0429923	0.000523247	0.0117698	0.0043497	0.0450106		E	0.00673583	0.0185706	0.0141396	0.0108031	0.00203804	0.0170736	0.0148854	-0.0040949	0.00122081	0.00548967	0.0180154	-0.00892629	0.00308541	0.0391214	0.0213221	0.00644872	0.0366776	0.000412777	0.0366988	0.0326866	0.0306444		E	0.0239003	0.0282118	0.0317146
D	0.034215	0.0159425	0.0122607	0.0150649	0.00346952	0.011197	0.00739191	0.00354737	0.0116188	0.00268809	0.00164186	0.00165639	0.0163708	0.0307119	0.0109434	-0.00561187	0.0379754	0.00719337	0.0259495	0.0199088	0.0831086		D	0.0143854	-0.00232771	0.0060621	0.00762179	-0.0078626	0.00510487	0.0481459	-0.00128831	0.0117338	0.00733768	0.00193444	-0.0194289	0.0336786	0.0185579	0.0042137	-0.00923386	0.0172355	0.00110296	0.0342087	0.00486018	-0.00689672		D	0.0054783	0.00438854	0.034521
*	N/A	N/A	N/A	N/A	N/A	N/A	N/A	N/A	N/A	N/A	N/A	N/A	N/A	N/A	N/A	N/A	N/A	N/A	N/A	N/A	N/A		*	N/A	N/A	N/A	N/A	N/A	N/A	N/A	N/A	N/A	N/A	N/A	N/A	N/A	N/A	N/A	N/A	N/A	N/A	N/A	N/A	N/A		*	N/A	N/A	N/A
[truncated: 40 more columns]

[truncated: 1 more sheets: P-value 2D aminoacid heatmap]
