# Supplementary material for: Context specificity of translation inhibitors revealed by toe-seq
Source: Research Square preprint supplement (doi:10.21203/rs.3.rs-3832009/v1), 2024-04-03
Supplement: Supplementary file 7 [file 6e45b56822a694e6b7cf108a.xlsx]

## Sheet: Title
Supplementary table 1
Ribosome stalling sites, positional, amino acid and codon preferences of ribosome stalling sites, preferences of stalling at combinations of codons and corresponding amino acids in different sites and its significance for translation inhibition by Ths.

## Sheet: Codon heatmap
Stop efficiency at the corresponging triplet in the -2nd position while mRNA codon with specified index number is located in the P-site													Stop efficiency at the corresponging triplet in the E-site while mRNA codon with specified index number is located in the P-site													Stop efficiency at the corresponging triplet in the P-site while mRNA codon with specified index number is located in the P-site													Stop efficiency at the corresponging triplet in the A-site while mRNA codon with specified index number is located in the P-site
-2		Index number of mRNA codon located in the P-site											E		Index number of mRNA codon located in the P-site											P		Index number of mRNA codon located in the P-site											A		Index number of mRNA codon located in the P-site
		4	5	6	7	8	9	10	11	12	13				3	4	5	6	7	8	9	10	11	12				2	3	4	5	6	7	8	9	10	11				1	2	3	4	5	6	7	8	9
P	CCC	-0.0444264	-0.0305445	-0.0218713	-0.00307041	-0.0237489	-0.0212015	-0.0254271	-0.0328529	-0.0140164	-0.00861745		P	CCC	-0.027381	-0.0363777	-0.0418623	-0.0384241	-0.0226017	-0.0331089	-0.03463	-0.0357933	-0.0407002	-0.0168642		P	CCC	-0.0180128	-0.0273822	-0.0586439	-0.0549237	-0.0399192	-0.0381166	-0.0487717	-0.0459052	-0.0446319	-0.0501066		P	CCC	0.269035	-0.00140484	-0.0227415	-0.0488572	-0.0408388	-0.0291395	-0.0335233	-0.0382684	-0.0354752
P	CCT	-0.0414112	-0.0348848	-0.0140938	-0.00804396	-0.0236676	-0.0216955	-0.0234681	-0.0308696	-0.0093223	-0.011019		P	CCT	-0.0334073	-0.048721	-0.0399699	-0.041734	-0.0170226	-0.0355831	-0.0294553	-0.0349319	-0.0441986	-0.0122224		P	CCT	-0.0222295	-0.03153	-0.0589784	-0.0498719	-0.0373439	-0.0411283	-0.0425615	-0.0363446	-0.0408174	-0.0539603		P	CCT	0.324245	-0.0117689	-0.0270644	-0.0498028	-0.0485989	-0.036719	-0.0204111	-0.0374113	-0.0354647
P	CCA	-0.0551409	-0.0341683	-0.021445	-0.0206563	-0.022824	-0.0233722	-0.0250537	-0.0290438	-0.00858524	-0.00268667		P	CCA	-0.0334089	-0.064716	-0.0562629	-0.0428022	-0.0357557	-0.0388883	-0.0385841	-0.0409381	-0.0406668	-0.000894195		P	CCA	-0.0243205	-0.0478144	-0.0788942	-0.0645593	-0.0465309	-0.0400397	-0.0549599	-0.0506841	-0.0437591	-0.0471272		P	CCA	0.466695	0.00848763	-0.028693	-0.047668	-0.0401697	-0.0261502	-0.0162256	-0.0295943	-0.0372942
P	CCG	-0.0448234	-0.0347604	-0.0286586	-0.003027	-0.0228545	-0.0221411	-0.0230506	-0.031233	-0.0157818	-0.0100285		P	CCG	-0.0377624	-0.0548156	-0.0433801	-0.0325906	-0.0276458	-0.0344451	-0.0364383	-0.0307658	-0.0415545	-0.0176756		P	CCG	-0.00955003	-0.0355216	-0.0707935	-0.0533186	-0.0412646	-0.0385555	-0.0450253	-0.0448175	-0.0452622	-0.0417849		P	CCG	0.3744	0.00497785	-0.0234634	-0.0456688	-0.0425523	-0.0376684	-0.0232082	-0.0338109	-0.0328053
L	CTC	-0.0474034	-0.038307	-0.0220212	-0.00941565	-0.0267964	-0.0232656	-0.0280762	-0.0349507	-0.0190119	-0.00997119		L	CTC	-0.0214222	-0.0442777	-0.0324321	-0.0313643	-0.0210322	-0.0298078	-0.0224409	-0.0284575	-0.0314823	-0.0131768		L	CTC	-0.00479691	-0.0201	-0.0460716	-0.0378434	-0.0318646	-0.0183439	-0.025935	-0.0204838	-0.0233717	-0.0462851		L	CTC	0.31851	0.00452886	-0.026869	-0.0396592	-0.035968	-0.0255465	-0.0121647	-0.0260058	-0.0225758
L	CTT	-0.0333046	-0.0374417	-0.0331968	-0.0210366	-0.0284912	-0.0237134	-0.0227878	-0.0346742	-0.0130741	-0.0118762		L	CTT	-0.0268632	-0.0488863	-0.0367101	-0.0348916	0.0077584	-0.0315948	-0.0263298	-0.0175602	-0.0385972	-0.0131402		L	CTT	-0.0201475	-0.0338019	-0.0495469	-0.0412749	-0.0278102	-0.0121791	-0.0284765	-0.0142219	-0.0233092	-0.0505812		L	CTT	0.373247	-0.02755	-0.0496657	-0.0661618	-0.0460719	-0.0522405	-0.0328947	-0.0261351	-0.0308544
L	CTA	-0.0446985	-0.0423408	-0.0402567	-0.010952	-0.0212812	-0.0235842	-0.0236217	-0.0262156	-0.0103194	-0.0142637		L	CTA	-0.0202226	-0.0382698	-0.0307963	-0.0273522	-0.00124295	-0.0204953	-0.0173133	-0.0127369	-0.0255723	-0.0086872		L	CTA	-0.038353	-0.0315345	-0.0631244	-0.0392789	-0.0283839	-0.0228424	-0.0269632	-0.0277326	-0.0165568	-0.0284634		L	CTA	0.331658	-0.0883909	-0.0677456	-0.106538	-0.121932	-0.080155	-0.0556754	-0.0598173	-0.0461953
L	CTG	-0.056942	-0.0394877	-0.0369543	-0.00939366	-0.0254265	-0.023839	-0.0255581	-0.0318475	-0.00934288	-0.0106847		L	CTG	-0.0293421	-0.0484503	-0.0508127	-0.0183055	-0.0203209	-0.0288904	-0.0260759	-0.021753	-0.0357073	-0.0116742		L	CTG	0.00673053	-0.0216314	-0.0519902	-0.0449658	-0.0280609	-0.0100455	-0.0288005	-0.0201497	-0.0246869	-0.0431237		L	CTG	0.426158	-0.00230155	-0.0254254	-0.0420012	-0.0390233	-0.0238416	-0.0193922	-0.0248041	-0.019289
H	CAC	-0.0475845	-0.0495903	-0.0381353	-0.0156897	-0.0322258	-0.0281028	-0.0289223	-0.0444605	-0.0150597	-0.0100131		H	CAC	-0.0294439	-0.0485375	-0.0426708	-0.0298947	-0.0183418	-0.028725	-0.0206105	-0.0261721	-0.0332251	-0.0167399		H	CAC	0.019563	-0.0263442	-0.0391089	-0.0370446	-0.0306928	-0.0146169	-0.0251345	-0.021672	-0.0172148	-0.0348287		H	CAC	0.467782	0.0128505	-0.0278629	-0.0443121	-0.0381862	-0.0275338	-0.0125117	-0.0242129	-0.0220744
H	CAT	-0.0489982	-0.0460089	-0.0462726	-0.0117251	-0.0350294	-0.024194	-0.0303325	-0.0448767	-0.020921	-0.00890824		H	CAT	-0.0251031	-0.0487059	-0.0398477	-0.0343187	-0.0153519	-0.0241907	-0.0234455	-0.0206901	-0.0291101	-0.00926863		H	CAT	-0.0206587	-0.0322763	-0.0487379	-0.0382111	-0.0345544	-0.0181446	-0.0269467	-0.0237087	-0.0157799	-0.0381376		H	CAT	0.503903	-0.0107143	-0.0301678	-0.0492916	-0.0408545	-0.0376611	-0.0151926	-0.0259602	-0.0258161
Q	CAA	-0.0620617	-0.0548676	-0.0323497	-0.023609	-0.0274246	-0.0260733	-0.0335652	-0.0449142	-0.0158845	-0.0208053		Q	CAA	-0.0329605	-0.0549809	-0.0522347	-0.0364131	-0.016623	-0.0269527	-0.0184147	-0.0176272	-0.0251246	-0.0130885		Q	CAA	-0.0134051	-0.0305341	-0.0382819	-0.0441988	-0.0286927	-0.0132898	-0.023869	-0.0176855	-0.0205033	-0.0233268		Q	CAA	0.520194	0.00523203	-0.0219556	-0.0385906	-0.0387108	-0.0298905	-0.017171	-0.0212043	-0.0165227
Q	CAG	-0.0611174	-0.0454778	-0.0249789	-0.00610363	-0.0253588	-0.0268208	-0.026973	-0.0334148	-0.00418775	-0.0111742		Q	CAG	-0.0329994	-0.057677	-0.0445733	-0.025058	-0.0180199	-0.0274307	-0.0145247	-0.0167996	-0.0350775	-0.0100029		Q	CAG	-0.0199105	-0.0387421	-0.0505357	-0.0377739	-0.0314954	-0.0208967	-0.0211215	-0.021334	-0.0161443	-0.0315792		Q	CAG	0.486682	-0.00933767	-0.0292231	-0.0531694	-0.0420759	-0.0330088	-0.0079174	-0.0273038	-0.0200067
R	CGC	-0.0465824	-0.046846	-0.0275027	-0.0159388	-0.0343903	-0.029605	-0.0272708	-0.035348	-0.0170351	-0.00639357		R	CGC	-0.0291759	-0.0448595	-0.0323789	-0.0352166	-0.00862869	-0.0249665	-0.0229524	-0.0224772	-0.0522394	-0.0191143		R	CGC	0.0494646	-0.0181337	-0.0339453	-0.0329458	-0.0298994	-0.00620204	-0.0282789	-0.0233656	-0.0267321	-0.0358086		R	CGC	0.399729	0.00938032	-0.0125522	-0.0312965	-0.0277869	-0.0224883	-0.00867925	-0.0228389	-0.0193054
R	CGT	-0.0570176	-0.060114	-0.0292236	-0.0174773	-0.0410907	-0.029354	-0.0219666	-0.0341586	-0.0193448	-0.0112453		R	CGT	-0.0257273	-0.0446076	-0.0429578	-0.0407371	-0.0173048	-0.0265501	-0.0232524	-0.023708	-0.054421	-0.0190458		R	CGT	0.0367418	-0.0256358	-0.0448792	-0.0405575	-0.0304452	-0.00618767	-0.0288229	-0.0225906	-0.0197786	-0.0372712		R	CGT	0.42074	0.00800402	-0.0253171	-0.0418782	-0.0295475	-0.0287301	0.000132864	-0.0208215	-0.0194583
R	CGA	-0.0432871	-0.0431949	-0.0442478	-0.0108318	-0.0331951	-0.0262273	-0.0249269	-0.0249119	-0.0170887	-0.00220374		R	CGA	-0.0311888	-0.0497105	-0.0445707	-0.0251466	-0.0216012	-0.0238243	-0.0162518	-0.0203276	-0.0430024	-0.019713		R	CGA	-0.041998	-0.053751	-0.0681639	-0.069285	-0.0534509	-0.0370506	-0.0367202	-0.0243715	-0.0351409	-0.0847808		R	CGA	0.445171	-0.0247448	-0.0426904	-0.0544878	-0.0433105	-0.032045	-0.021082	-0.0312811	-0.0341754
R	CGG	-0.0380032	-0.0370288	-0.0327528	-0.0106881	-0.0278209	-0.0278291	-0.0244142	-0.0333979	-0.0083702	-0.0105226		R	CGG	-0.0211611	-0.0421713	-0.0328847	-0.0235148	0.00504253	-0.018228	-0.0178712	-0.018391	-0.0412529	-0.0135577		R	CGG	0.0262693	-0.0220683	-0.0445778	-0.0317357	-0.0216441	-0.00727185	-0.0209281	-0.0159262	-0.0205509	-0.0260053		R	CGG	0.339863	0.000183891	-0.0224559	-0.0301063	-0.0366161	-0.0257486	-0.0109828	-0.0197199	-0.0219143
S	TCC	-0.0534717	-0.0300873	-0.0286093	-0.00926543	-0.0248853	-0.0236333	-0.0286159	-0.0445766	-0.00932893	-0.00897197		S	TCC	-0.0258766	-0.0344794	-0.0476664	-0.0330125	-0.0120323	-0.0266624	-0.0315526	-0.0347434	-0.0354734	-0.0108834		S	TCC	-0.0196352	-0.0185976	-0.0451022	-0.0355356	-0.0255072	-0.00141188	-0.023181	-0.0258306	-0.0268868	-0.0324409		S	TCC	0.338098	0.00881301	-0.0288225	-0.0400559	-0.0367415	-0.0301876	-0.00244791	-0.0221955	-0.0193363
S	TCT	-0.0619344	-0.0497181	-0.0386619	-0.00696605	-0.0224494	-0.0217698	-0.0162616	-0.0380209	-0.0208792	-0.00583584		S	TCT	-0.0317291	-0.0474471	-0.0525597	-0.0312794	-0.0252249	-0.0289893	-0.0191242	-0.0295387	-0.0309617	-0.016229		S	TCT	-0.0259476	-0.0336102	-0.0496592	-0.04128	-0.0232088	-0.00959465	-0.0254738	-0.0190976	-0.0188839	-0.0379146		S	TCT	0.462021	0.0113105	-0.0379473	-0.0473406	-0.0428882	-0.0271577	-0.00673129	-0.0272088	-0.0187408
S	TCA	-0.0608866	-0.0505748	-0.032525	-0.024193	-0.0298422	-0.0222024	-0.0241858	-0.0342762	-0.00796483	-0.00576379		S	TCA	-0.0404007	-0.052408	-0.0404673	-0.0299379	-0.0157869	-0.0284208	-0.0279261	-0.0157569	-0.0266503	-0.0156844		S	TCA	-0.0442897	-0.0409664	-0.0785635	-0.0516928	-0.0392201	-0.0127832	-0.0245233	-0.027179	-0.0290539	-0.0257887		S	TCA	0.530755	-0.00227203	-0.0422913	-0.030349	-0.0456676	-0.0292713	-0.0135624	-0.0289483	-0.0176341
S	TCG	-0.039117	-0.0301295	-0.0281823	-0.0197032	-0.0302025	-0.0144836	-0.0193132	-0.0290285	-0.00689465	-0.0101985		S	TCG	-0.0305055	-0.0466769	-0.0390866	-0.031525	-0.0149698	-0.0239962	-0.0188371	-0.0287993	-0.0248407	-0.0155152		S	TCG	-0.0445273	-0.0326912	-0.0610316	-0.0496561	-0.0324449	-0.0170314	-0.0236096	-0.0240946	-0.0248488	-0.0324027		S	TCG	0.397085	-0.00964263	-0.0434124	-0.0528742	-0.0515552	-0.0344237	-0.00275328	-0.0319061	-0.0222523
F	TTC	-0.056761	-0.0565665	-0.0363117	-0.0282411	-0.0272928	-0.0266629	-0.0340452	-0.0548957	-0.015229	-0.0099139		F	TTC	-0.0263215	-0.0582429	-0.0503069	-0.0331847	-0.0289675	-0.024003	-0.0206335	-0.0225662	-0.0345828	-0.00870603		F	TTC	-0.00291943	-0.0168624	-0.0529338	-0.0432954	-0.0350726	-0.0206394	-0.0302314	-0.0234879	-0.0322358	-0.0297783		F	TTC	0.330301	0.0261758	-0.0221426	-0.0310391	-0.0254443	-0.0148193	0.00480339	-0.0163771	-0.0146019
F	TTT	-0.0508546	-0.0514853	-0.0362112	-0.0283897	-0.0215841	-0.0316742	-0.022383	-0.0480617	-0.00666852	-0.00905054		F	TTT	-0.0245642	-0.0463206	-0.0489497	-0.0192249	-0.0231825	-0.0198841	-0.0152989	-0.0283611	-0.0399983	-0.00376926		F	TTT	-0.00807924	-0.0275406	-0.0519965	-0.0405343	-0.0377056	0.00285134	-0.0241986	-0.0235346	-0.0364724	-0.0406716		F	TTT	0.447123	0.0271903	-0.0308774	-0.0317709	-0.0245942	-0.0105352	-0.00069799	-0.019111	-0.0240816
L	TTA	-0.0554789	-0.0401587	-0.0252846	-0.0186431	-0.0332255	-0.0227458	-0.0175177	-0.041201	-0.0148581	-0.0227971		L	TTA	-0.0239922	-0.0484894	-0.0579261	-0.0183773	-0.0105311	-0.0216784	-0.0312126	-0.0200056	-0.0325333	-0.00525614		L	TTA	-0.0221229	-0.0242011	-0.0598869	-0.0573769	-0.021129	-0.0171838	-0.025135	-0.0290863	-0.0201308	-0.0397776		L	TTA	0.498719	0.0182902	-0.0489876	-0.0653118	-0.0618489	-0.0299007	-0.00481819	-0.0324737	-0.0252424
L	TTG	-0.0399077	-0.0358376	-0.0340679	-0.0104279	-0.028582	-0.0173715	-0.0202538	-0.0253141	-0.00936978	-0.0098811		L	TTG	-0.0213264	-0.0352471	-0.0480712	-0.039672	-0.017345	-0.0227399	-0.0203529	-0.0217759	-0.028352	-0.00764713		L	TTG	-0.0106492	-0.0185755	-0.0555207	-0.0451599	-0.0251388	-0.0216983	-0.0239057	-0.0237715	-0.0214842	-0.0327902		L	TTG	0.371961	0.00966188	-0.0303967	-0.0561731	-0.0392609	-0.0300705	-0.0109592	-0.0163334	-0.0202092
Y	TAC	-0.0554368	-0.0391657	-0.0356635	-0.00995166	-0.026638	-0.0261195	-0.0288488	-0.028464	-0.00526576	-0.011315		Y	TAC	-0.0323545	-0.0533601	-0.0443429	-0.0280027	-0.0167368	-0.0254406	-0.0261824	-0.0198832	-0.0256158	-0.0200534		Y	TAC	-0.00650955	-0.032208	-0.0488914	-0.055801	-0.0339382	-0.0180671	-0.0236989	-0.0267523	-0.00801182	-0.0378736		Y	TAC	0.470173	0.0371127	-0.0202235	-0.0462505	-0.0408477	-0.0270892	-0.0234025	-0.035259	-0.021928
Y	TAT	-0.0439191	-0.0475073	-0.0318788	-0.0278895	-0.0237914	-0.0174283	-0.0140054	-0.0346082	-0.0270973	-0.00205429		Y	TAT	-0.0195906	-0.0438698	-0.0380517	-0.0279478	-0.0319389	-0.0225919	-0.0205023	-0.0139572	-0.0332794	-0.00845094		Y	TAT	0.00713179	-0.0359504	-0.0457649	-0.042971	-0.0198017	-0.0260708	-0.0343854	-0.0175938	-0.0211719	-0.0684433		Y	TAT	0.469185	0.00183215	-0.0310391	-0.0592715	-0.0671578	-0.0268874	-0.0235251	-0.0430185	-0.023715
*	TAA	0	0	0	0	0	0	0	0	0	0		*	TAA	0	0	0	0	0	0	0	0	0	0		*	TAA	0	0	0	0	0	0	0	0	0	0		*	TAA	-0.0255018	-0.332212	-0.118351	-0.17257	-0.176217	-0.121409	-0.0484158	-0.064833	-0.0687002
*	TAG	0	0	0	0	0	0	0	0	0	0		*	TAG	0	0	0	0	0	0	0	0	0	0		*	TAG	0	0	0	0	0	0	0	0	0	0		*	TAG	-0.0146363	-0.258484	-0.106239	-0.193129	-0.156109	-0.103357	-0.0836622	-0.059522	-0.0749734
C	TGC	-0.0534745	-0.0468296	-0.0227922	-0.0147732	-0.028456	-0.0238529	-0.0206036	-0.0399567	-0.00978193	-0.00776003		C	TGC	-0.0329905	-0.0381269	-0.036078	-0.0272338	-0.0135884	-0.0241835	-0.0179327	-0.0223996	-0.0343033	-0.0119834		C	TGC	0.00931382	-0.0222733	-0.0420256	-0.041958	-0.0250376	-0.0174097	-0.0236994	-0.0171738	-0.0187038	-0.0346589		C	TGC	0.432359	0.0143083	-0.0186743	-0.038998	-0.0367312	-0.0239499	-0.00962886	-0.0278921	-0.027195
C	TGT	-0.0456072	-0.0449574	-0.0239108	-0.0171086	-0.0340119	-0.0233202	-0.031037	-0.0235011	-0.00639331	-0.00656363		C	TGT	-0.0234859	-0.0546655	-0.0469395	-0.0225628	0.00411022	-0.0215701	-0.0211537	-0.0210527	-0.0150262	-0.00866951		C	TGT	0.00247974	-0.017011	-0.0512581	-0.0404126	-0.0182572	-0.00558464	-0.0307909	-0.0153186	-0.0270948	-0.0397904		C	TGT	0.405057	-0.0173258	-0.0348061	-0.0553727	-0.0460391	-0.0400875	-0.0187272	-0.0332693	-0.0252733
*	TGA	0	0	0	0	0	0	0	0	0	0		*	TGA	0	0	0	0	0	0	0	0	0	0		*	TGA	0	0	0	0	0	0	0	0	0	0		*	TGA	0.0473292	-0.303642	-0.155214	-0.185804	-0.147767	-0.128478	-0.0579333	-0.0717001	-0.0679345
W	TGG	-0.0366476	-0.0381014	-0.0269771	-0.0103795	-0.0211437	-0.0188667	-0.022277	-0.0319811	-0.0139334	-0.0120212		W	TGG	-0.0184125	-0.0507084	-0.0438416	-0.017327	-0.00608264	-0.0177729	-0.0209747	-0.0139725	-0.0269201	-0.00783208		W	TGG	0.00339868	-0.0190586	-0.0419968	-0.0437239	-0.0192291	-0.00531418	-0.0256166	-0.01428	-0.0165406	-0.0349205		W	TGG	0.336666	-0.00303718	-0.0276818	-0.0444113	-0.0442313	-0.0278447	-0.0193146	-0.0246105	-0.0220227
T	ACC	-0.0526688	-0.0527067	-0.0275635	-0.0343799	-0.0330296	-0.0237991	-0.0291699	-0.0422231	-0.0114992	-0.00759788		T	ACC	-0.0313205	-0.05975	-0.0448147	-0.0272555	-0.0217068	-0.0256798	-0.0231607	-0.0268556	-0.0354725	-0.0179824		T	ACC	0.0409876	-0.0280727	-0.0522497	-0.0415937	-0.0290188	-0.0103133	-0.0283106	-0.0168419	-0.0264036	-0.0317064		T	ACC	0.451702	0.0286918	-0.0218698	-0.0347624	-0.0300519	-0.0237328	-0.0119802	-0.0251802	-0.0201238
T	ACT	-0.0709032	-0.0559513	-0.0441268	-0.0232546	-0.0259644	-0.0193274	-0.0333831	-0.0375076	-0.0118519	-0.00716445		T	ACT	-0.0348192	-0.0615587	-0.0356912	-0.0287485	-0.0282567	-0.0237919	-0.0201169	-0.0201711	-0.0331477	-0.00913272		T	ACT	-0.0121384	-0.0359967	-0.0444047	-0.0571059	-0.0369466	-0.0201096	-0.0229988	-0.0205837	-0.025801	-0.0285391		T	ACT	0.529916	0.0296679	-0.0148833	-0.035905	-0.030694	-0.030403	-0.0121897	-0.0255681	-0.0216561
T	ACA	-0.0538663	-0.0491232	-0.0289139	-0.0271839	-0.0279289	-0.0273278	-0.0213009	-0.0315114	-0.00410193	-0.00188058		T	ACA	-0.0339672	-0.0550494	-0.0494679	-0.033773	-0.0169662	-0.0260741	-0.0248118	-0.0171919	-0.0244611	-0.0144419		T	ACA	-0.0254294	-0.0358965	-0.0571197	-0.053985	-0.0373572	-0.021225	-0.0248905	-0.0214673	-0.017389	-0.0302277		T	ACA	0.527861	-0.0136787	-0.0488448	-0.0862568	-0.076006	-0.0528677	-0.0331783	-0.0432712	-0.0332553
T	ACG	-0.0409309	-0.0365089	-0.0325366	-0.0222135	-0.0259029	-0.0222736	-0.0209703	-0.0345359	-0.00800077	-0.00476994		T	ACG	-0.0243164	-0.0441869	-0.0414523	-0.0225593	-0.00674048	-0.0250365	-0.0211386	-0.019501	-0.028763	-0.0141257		T	ACG	-0.000575696	-0.033088	-0.0556505	-0.0389578	-0.0427809	-0.0120703	-0.0217561	-0.0238905	-0.022756	-0.0244145		T	ACG	0.445368	-0.0369131	-0.0466496	-0.0647459	-0.0585647	-0.0452188	-0.0182902	-0.036885	-0.0326073
I	ATC	-0.0547066	-0.0508632	-0.0333783	-0.020428	-0.0326103	-0.0290886	-0.0230643	-0.0462032	-0.011242	-0.0133834		I	ATC	-0.0346115	-0.0534477	-0.0494966	-0.0348988	-0.0160432	-0.0280628	-0.0206087	-0.0256122	-0.0352666	-0.0109634		I	ATC	0.0339154	-0.0290141	-0.0531604	-0.0452476	-0.029135	-0.00996514	-0.0318121	-0.0240529	-0.0218659	-0.0306456		I	ATC	0.521256	0.0363211	-0.018574	-0.0394207	-0.0235945	-0.0196872	-0.00638181	-0.0193089	-0.012196
I	ATT	-0.0628912	-0.0585456	-0.0377833	-0.0244926	-0.0293448	-0.0241046	-0.0170452	-0.0335881	-0.0134748	-0.00778012		I	ATT	-0.0406343	-0.0640389	-0.0613272	-0.0283971	-0.0319455	-0.0274716	-0.0299284	-0.0170713	-0.0328755	-0.00639133		I	ATT	-0.00566591	-0.0334832	-0.0570266	-0.0494902	-0.0306637	-0.0172611	-0.0244185	-0.0155041	-0.0216142	-0.0385377		I	ATT	0.517581	0.00672164	-0.0248845	-0.0514631	-0.0394435	-0.0224967	0.00828209	-0.0274678	-0.0160523
I	ATA	-0.048633	-0.0473723	-0.0428191	-0.0226812	-0.0253123	-0.0149757	-0.0211986	-0.036827	0.00191352	-0.00213706		I	ATA	-0.0370413	-0.0580264	-0.052486	-0.0382224	-0.00921642	-0.020766	-0.0236655	-0.02447	-0.0257582	-0.00795129		I	ATA	-0.0667183	-0.0446411	-0.0586175	-0.0685041	-0.0302484	-0.0305637	-0.0232429	-0.0194644	-0.012347	-0.0498869		I	ATA	0.561099	-0.0246745	-0.0656401	-0.070882	-0.0765322	-0.057221	-0.0110508	-0.0404712	-0.0231508
M	ATG	-0.0572187	-0.0467087	-0.0371516	-0.0257106	-0.0297749	-0.0183972	-0.0252064	-0.0166583	-0.0117734	-0.0221873		M	ATG	-0.0114702	-0.0515249	-0.0523626	-0.024876	-0.0071583	-0.0258572	-0.0229799	-0.0186074	-0.0304764	-0.0151586		M	ATG	0.181836	-0.0161079	-0.0379243	-0.0384626	-0.000669171	0.0149762	-0.00879294	-0.0162651	-0.0100436	-0.0291439		M	ATG	0.335145	-0.0147384	-0.0209128	-0.0409576	-0.0398162	-0.0267423	0.00117901	-0.0261088	-0.0174964
N	AAC	-0.056613	-0.0407457	-0.0375289	-0.0227283	-0.0355823	-0.0283989	-0.0186841	-0.0435607	-0.0101554	-0.0081015		N	AAC	-0.0322521	-0.0530217	-0.0450282	-0.0225662	-0.0218089	-0.0289241	-0.0262969	-0.0225071	-0.0235028	-0.0126321		N	AAC	-0.0242734	-0.0374174	-0.0574212	-0.0524124	-0.0392737	-0.010648	-0.0252389	-0.0196174	-0.0292536	-0.0350318		N	AAC	0.560084	0.0159109	-0.0338065	-0.0695639	-0.0460814	-0.0380113	-0.0175287	-0.029207	-0.0228317
N	AAT	-0.0463531	-0.0525713	-0.0308227	-0.0210046	-0.0250908	-0.0288123	-0.0106516	-0.0319092	-0.0214183	-0.0157936		N	AAT	-0.0320427	-0.0406089	-0.0444237	-0.0410189	-0.0118427	-0.0245619	-0.0100929	-0.00305588	-0.0271574	-0.0143897		N	AAT	-0.0366234	-0.0463049	-0.0587383	-0.0531047	-0.0361175	-0.025671	-0.0217265	-0.0176996	-0.0170886	-0.0319275		N	AAT	0.475786	-0.0591236	-0.0691958	-0.109754	-0.10297	-0.0566978	-0.0451622	-0.0471127	-0.0386742
K	AAA	-0.0551256	-0.0595472	-0.0443957	-0.019049	-0.0291077	-0.0364242	-0.0247165	-0.043793	0.000864646	-0.0122384		K	AAA	-0.0453838	-0.0648337	-0.0561009	-0.0350971	-0.0205275	-0.031424	-0.0153005	-0.0198491	-0.0233159	-0.00814373		K	AAA	-0.00292521	-0.030971	-0.0665115	-0.0535771	-0.0354821	-0.0195342	-0.0253115	-0.0321904	-0.0211922	-0.0213576		K	AAA	0.568492	0.0117386	-0.0356036	-0.0649288	-0.050786	-0.0442065	-0.0204719	-0.0286308	-0.0269265
K	AAG	-0.0547463	-0.0599463	-0.02753	-0.0256921	-0.0278813	-0.0238389	-0.0259593	-0.0322242	-0.0092411	-0.0123244		K	AAG	-0.037245	-0.0497925	-0.0513153	-0.0287823	-0.012596	-0.0278841	-0.0152418	-0.0264809	-0.0307781	-0.0109583		K	AAG	-0.0170393	-0.0519911	-0.0498313	-0.0423831	-0.0403412	-0.0142949	-0.026529	-0.012761	-0.0171689	-0.0318487		K	AAG	0.518687	-0.0177829	-0.0445042	-0.0966797	-0.0774645	-0.0456128	-0.0368151	-0.0316483	-0.0279935
S	AGC	-0.0472506	-0.0505152	-0.0374342	-0.0173263	-0.02387	-0.0270779	-0.0218636	-0.0368712	-0.0142511	-0.00621594		S	AGC	-0.0331819	-0.0586312	-0.0516159	-0.0285178	-0.0158789	-0.0292542	-0.025088	-0.0192245	-0.0285325	-0.0116721		S	AGC	-0.00310836	-0.0324264	-0.0434805	-0.0541412	-0.0360116	-0.0130011	-0.0247943	-0.0216246	-0.0165509	-0.0330444		S	AGC	0.48055	-0.0093599	-0.0266646	-0.0492954	-0.0459842	-0.0296385	-0.0112015	-0.0225509	-0.0202109
S	AGT	-0.0392761	-0.0298054	-0.0341368	-0.0143714	-0.0202427	-0.0166217	-0.0214333	-0.014922	-0.00314954	-0.0027714		S	AGT	-0.024859	-0.0508056	-0.0328099	-0.0229478	-0.0118989	-0.0220069	-0.024911	-0.0194798	-0.0197452	-0.00378571		S	AGT	-0.0334969	-0.0386808	-0.0478723	-0.0540372	-0.0215519	-0.0243466	-0.0188114	-0.0205236	-0.00647006	-0.0277137		S	AGT	0.420595	-0.0889604	-0.0791127	-0.102113	-0.0879624	-0.0853687	-0.0362183	-0.0569594	-0.0396318
R	AGA	-0.0447999	-0.0377288	-0.0513172	-0.0281604	-0.0224733	-0.0240503	-0.0211602	-0.0321896	-0.0206507	-0.0122751		R	AGA	-0.0321834	-0.0480554	-0.0395932	-0.0232743	-0.00855499	-0.0206728	-0.0167203	-0.0125229	-0.0274781	-0.0147442		R	AGA	-0.0244638	-0.0443931	-0.0730549	-0.0491953	-0.0270644	-0.0273309	-0.0283834	-0.0169229	-0.0186277	-0.041398		R	AGA	0.503569	-0.0861841	-0.0852084	-0.102256	-0.100227	-0.0680173	-0.0304157	-0.0707901	-0.0528098
R	AGG	-0.0378169	-0.0396984	-0.0178028	-0.0255991	-0.0304799	-0.0285103	-0.0207318	-0.0330814	-0.00997999	-0.00655747		R	AGG	-0.024375	-0.0422784	-0.0300526	-0.0183776	0.00134526	-0.02278	-0.0132493	-0.0169764	-0.0377731	-0.00931674		R	AGG	0.00587141	-0.0373822	-0.0511538	-0.0403963	-0.0315701	-0.000183303	-0.0216637	-0.0160406	-0.0193675	-0.0375795		R	AGG	0.390326	-0.0295491	-0.0445278	-0.0869615	-0.0698058	-0.0421796	-0.0269569	-0.0384588	-0.0323076
A	GCC	-0.0471965	-0.035244	-0.0279856	-0.015382	-0.0261063	-0.0258318	-0.0278995	-0.0335073	-0.0144484	-0.00943961		A	GCC	-0.0308883	-0.0396828	-0.0464545	-0.0319647	-0.0164552	-0.0299793	-0.0258448	-0.0298531	-0.0326792	-0.011796		A	GCC	-0.0186565	-0.0265383	-0.0428474	-0.0414283	-0.0329882	-0.00866993	-0.0249777	-0.0219295	-0.0213833	-0.0203812		A	GCC	0.368986	0.00657951	-0.0298469	-0.0442001	-0.0370114	-0.0242413	-0.0150089	-0.0250389	-0.0198129
A	GCT	-0.0464294	-0.0359129	-0.0424696	-0.0130207	-0.0318736	-0.0284383	-0.0239048	-0.035483	-0.0144401	-0.00657792		A	GCT	-0.0250152	-0.0606572	-0.0564626	-0.041292	-0.0110588	-0.0336066	-0.0269674	-0.0296262	-0.0324544	-0.0128597		A	GCT	-0.0138473	-0.0283064	-0.0418612	-0.0359372	-0.0400212	-0.00977029	-0.0241953	-0.0173064	-0.0183967	-0.0344282		A	GCT	0.406882	0.0107823	-0.0180073	-0.0360167	-0.0244916	-0.0159367	-0.00225517	-0.0210536	-0.0192171
A	GCA	-0.0676899	-0.0480182	-0.0423132	-0.0128835	-0.0296084	-0.0201676	-0.0196983	-0.0371714	-0.0122904	-0.010829		A	GCA	-0.042321	-0.0581873	-0.0590607	-0.0415526	-0.00884229	-0.0284781	-0.0249586	-0.0220054	-0.0303195	-0.0190064		A	GCA	-0.012281	-0.0272029	-0.0500421	-0.0397386	-0.0341746	-0.0134409	-0.0237953	-0.0228306	-0.0226439	-0.0300325		A	GCA	0.541223	0.0369756	-0.0224467	-0.0309841	-0.0287488	-0.0224693	-0.00255121	-0.0251713	-0.0170806
A	GCG	-0.0449858	-0.0406065	-0.0256454	-0.00340937	-0.0216864	-0.020096	-0.0182082	-0.0292115	-0.0112129	-0.00542474		A	GCG	-0.0263261	-0.0477704	-0.0419474	-0.0277698	-0.0132102	-0.0315283	-0.0278475	-0.0222825	-0.0341809	-0.0124606		A	GCG	-0.0114897	-0.0320226	-0.0450614	-0.0337368	-0.0176401	-0.00474308	-0.0260093	-0.0211047	-0.0222483	-0.0222873		A	GCG	0.357448	0.00310164	-0.0251798	-0.0444351	-0.0421832	-0.0316985	-0.00984052	-0.0220749	-0.022264
V	GTC	-0.0522764	-0.0440766	-0.035867	-0.0245887	-0.0275392	-0.0259762	-0.0313154	-0.0299649	-0.0173213	-0.00429845		V	GTC	-0.0411621	-0.0543646	-0.0393397	-0.0318982	-0.0225069	-0.0316459	-0.0239666	-0.0265825	-0.0314725	-0.0125603		V	GTC	-0.00285074	-0.0261658	-0.0390579	-0.0421335	-0.0319591	-0.00831962	-0.0311536	-0.0175051	-0.0242343	-0.0292506		V	GTC	0.462052	0.0273301	-0.0109025	-0.0295306	-0.0246629	-0.0187213	-0.0110762	-0.0191125	-0.0156697
V	GTT	-0.0402184	-0.0427737	-0.0471009	0.00204138	-0.0363046	-0.029232	-0.0214874	-0.0405772	-0.0176992	-0.0057885		V	GTT	-0.0323273	-0.0490822	-0.0505025	-0.0312763	-0.014366	-0.0333225	-0.0243139	-0.0301603	-0.0453743	-0.0225853		V	GTT	-0.00836591	-0.0300436	-0.0447133	-0.046849	-0.0246275	0.00433162	-0.0252347	-0.0178029	-0.0188593	-0.0396845		V	GTT	0.424653	0.0399296	-0.0127797	-0.0283979	-0.0224694	-0.0215127	-0.00155172	-0.0202062	-0.0131065
V	GTA	-0.0678989	-0.0510129	-0.02814	-0.0151935	-0.0259544	-0.0303178	-0.0207304	-0.0367238	-0.00829618	-0.00505638		V	GTA	-0.0437451	-0.0575198	-0.0481828	-0.0309937	-0.0201281	-0.0227189	-0.0195712	-0.0166083	-0.0377573	-0.00624295		V	GTA	-0.0194571	-0.0169989	-0.057573	-0.036106	-0.0274008	-0.000301846	-0.0214654	-0.0212994	-0.0190358	-0.0286733		V	GTA	0.562885	0.0564742	-0.0169586	-0.0368088	-0.0326122	-0.0256576	0.0121169	-0.019284	-0.0204576
V	GTG	-0.0562448	-0.0330473	-0.0297508	-0.0205163	-0.0255005	-0.0243543	-0.029373	-0.020922	-0.01717	-0.00781281		V	GTG	-0.0282163	-0.0393053	-0.0475658	-0.0308173	-0.0125288	-0.0279328	-0.0148921	-0.00978457	-0.0396518	-0.0126457		V	GTG	0.0117183	-0.0177069	-0.0461929	-0.0376171	-0.0232926	-0.00572751	-0.0142107	-0.0122512	-0.0186687	-0.0151906		V	GTG	0.401589	0.0251268	-0.0109776	-0.0374364	-0.0315421	-0.00945107	0.00205362	-0.0184562	-0.0147861
D	GAC	-0.05207	-0.0474246	-0.0255203	-0.0273187	-0.0276085	-0.0247219	-0.0205285	-0.0208144	-0.0125756	-0.00363413		D	GAC	-0.051205	-0.0618206	-0.0557657	-0.0394996	-0.0266742	-0.0304674	-0.0279432	-0.0252379	-0.0237412	-0.015411		D	GAC	-0.0279457	-0.0377337	-0.0474202	-0.0519485	-0.0324148	-0.00889257	-0.022104	-0.0232244	-0.0199383	-0.0282078		D	GAC	0.472116	-0.00131274	-0.0275518	-0.0466511	-0.0438832	-0.0319591	-0.0220596	-0.0294634	-0.0217743
D	GAT	-0.0589145	-0.0560738	-0.0449663	-0.0306658	-0.0203824	-0.0246569	-0.0210031	-0.0199241	-0.00172978	-0.00816883		D	GAT	-0.042966	-0.0598266	-0.0521125	-0.0445943	-0.0109469	-0.0320861	-0.0206624	-0.0205685	-0.022202	-0.0101643		D	GAT	-0.0528793	-0.0443859	-0.0681071	-0.0449423	-0.0331238	-0.0135877	-0.0268717	-0.0148358	-0.00992772	-0.0364607		D	GAT	0.490329	-0.0198445	-0.0557641	-0.0628242	-0.0592976	-0.0429631	-0.0407486	-0.0286825	-0.0239109
E	GAA	-0.0592049	-0.0499379	-0.0363399	-0.0176008	-0.0183954	-0.0239701	-0.0220152	-0.0342415	-0.0124766	-0.0146526		E	GAA	-0.0509407	-0.0635538	-0.0519083	-0.0301998	-0.0222662	-0.0336746	-0.0262142	-0.0155879	-0.0329503	-0.00935489		E	GAA	-0.0674782	-0.0520512	-0.0654402	-0.0462344	-0.0498033	-0.00899059	-0.0212578	-0.021741	-0.0192828	-0.02026		E	GAA	0.559432	-0.0123592	-0.0450467	-0.0597884	-0.0509097	-0.0230572	-0.00720394	-0.0336116	-0.0194521
E	GAG	-0.0399127	-0.0484803	-0.0274522	-0.0135614	-0.0276951	-0.0245409	-0.0253111	-0.0296125	-0.00762736	-0.00500302		E	GAG	-0.0265297	-0.0477433	-0.0466457	-0.0283398	-0.0147667	-0.0207234	-0.0172971	-0.0243629	-0.0253866	0.00184435		E	GAG	-0.0445619	-0.0460696	-0.0471507	-0.0462151	-0.0299891	-0.000712749	-0.0211563	-0.0213486	-0.0119099	-0.0168631		E	GAG	0.410992	-0.0149174	-0.0450007	-0.0650181	-0.0606778	-0.0285989	-0.0053714	-0.0282013	-0.0293229
G	GGC	-0.039747	-0.0388885	-0.0206428	-0.0131105	-0.02702	-0.0194125	-0.0247327	-0.0316359	-0.00867521	-0.0048856		G	GGC	-0.0223906	-0.0410726	-0.0349793	-0.0324723	-0.0118226	-0.0263651	-0.0257824	-0.0247607	-0.0226293	-0.0108812		G	GGC	0.00290216	-0.0233921	-0.035243	-0.0433922	-0.0301161	-0.00969425	-0.0264311	-0.0244573	-0.0187628	-0.0266976		G	GGC	0.358937	0.0216904	-0.0111474	-0.0299366	-0.0205653	-0.0183516	-0.0114914	-0.020523	-0.0177168
G	GGT	-0.032521	-0.04337	-0.0223925	-0.0147101	-0.0216002	-0.0201564	-0.0188679	-0.0278314	-0.00591709	-0.0043757		G	GGT	-0.0230326	-0.0556155	-0.0396536	-0.0303623	-0.00975297	-0.0324225	-0.0267598	-0.0205503	-0.0239236	0.000373361		G	GGT	-0.0114166	-0.0353215	-0.0491078	-0.03854	-0.0189466	-0.0130549	-0.0218354	-0.0227564	-0.0176009	-0.026058		G	GGT	0.345554	0.0173501	-0.0316399	-0.0373235	-0.0311373	-0.0248737	-0.00994181	-0.0245305	-0.0207842
G	GGA	-0.0449556	-0.0499757	-0.0308089	-0.0169012	-0.0243867	-0.0167977	-0.0117242	-0.0329714	-0.0116884	-0.00646874		G	GGA	-0.0280368	-0.0612048	-0.047057	-0.0300552	-0.0138272	-0.0317216	-0.0273353	-0.0171904	-0.0266491	-0.0013744		G	GGA	-0.0101134	-0.0377911	-0.0678325	-0.0514151	-0.0315704	-0.0215735	-0.02766	-0.021702	-0.0273085	-0.0256409		G	GGA	0.417431	0.0154558	-0.0318201	-0.0437976	-0.0326864	-0.0144343	-0.00351748	-0.0262063	-0.0296333
G	GGG	-0.0257748	-0.0287695	-0.0245529	-0.00363677	-0.0251109	-0.020227	-0.0229478	-0.0269885	-0.000161367	-0.00487682		G	GGG	-0.0138511	-0.039849	-0.0302836	-0.0214179	-0.00446638	-0.0225762	-0.0211052	-0.0208608	-0.0226231	0.00670758		G	GGG	-0.000445184	-0.0204734	-0.0352907	-0.0310806	-0.0190273	-0.00224389	-0.022231	-0.0229522	-0.016975	-0.0219947		G	GGG	0.259553	-0.00114057	-0.0165291	-0.0348623	-0.0300878	-0.0183956	-0.0134207	-0.0197418	-0.0179419
[truncated: 12 more columns]

## Sheet: P-value for codon heatmap
P-value for shuffled datasets exceeding experimental data of stop efficiency at the corresponging triplet in the -2nd position while mRNA codon with specified index number is located in the P-site													P-value for shuffled datasets exceeding experimental data of stop efficiency at the corresponging triplet in the E-site while mRNA codon with specified index number is located in the P-site													P-value for shuffled datasets exceeding experimental data of stop efficiency at the corresponging triplet in the P-site while mRNA codon with specified index number is located in the P-site													P-value for shuffled datasets exceeding experimental data of stop efficiency at the corresponging triplet in the A-site while mRNA codon with specified index number is located in the P-site
-2		Index number of mRNA codon located in the P-site											E		Index number of mRNA codon located in the P-site											P		Index number of mRNA codon located in the P-site											A		Index number of mRNA codon located in the P-site
		4	5	6	7	8	9	10	11	12	13				3	4	5	6	7	8	9	10	11	12				2	3	4	5	6	7	8	9	10	11				1	2	3	4	5	6	7	8	9
P	CCC	0.0179104	0	0.00597015	0	0.0248756	0.0616915	0.765174	0.539303	0.886567	0.6		P	CCC	0.118408	0	0.316418	0.99801	0.98806	0.997015	1	1	1	0.987065		P	CCC	0.997015	0.126368	1	1	0.999005	1	1	1	1	1		P	CCC	1	0.103483	0.000995025	0.349254	0.078607	0.216915	1	1	1
P	CCT	0.0119403	0.0169154	0	0.0995025	0.104478	0.245771	0.434826	0.302488	0.223881	0.872637		P	CCT	0.800995	0.478607	0.21194	0.991045	0.649751	0.999005	0.972139	1	0.997015	0.557214		P	CCT	0.997015	0.693532	0.979104	0.915423	0.901493	1	1	1	1	1		P	CCT	1	0.778109	0.159204	0.472637	0.857711	0.892537	0.800995	1	1
P	CCA	0.841791	0.0159204	0.0437811	0.874627	0.0606965	0.479602	0.695522	0.173134	0.181095	0.0497512		P	CCA	0.787065	1	0.99801	0.999005	1	1	1	1	0.962189	0.00696517		P	CCA	0.995025	1	1	1	1	1	1	1	1	0.997015		P	CCA	0	0.0119403	0.350249	0.280597	0.146269	0.100498	0.557214	0.693532	1
P	CCG	0.0477612	0.00298507	0.366169	0.000995025	0.0149254	0.2	0.38607	0.256716	0.968159	0.841791		P	CCG	0.997015	0.979104	0.595025	0.718408	1	0.999005	1	0.999005	0.99602	0.99204		P	CCG	0.728358	0.987065	1	0.999005	1	1	1	1	1	0.99801		P	CCG	0.999005	0.00696517	0.00199005	0.0895522	0.286567	0.970149	0.962189	0.99602	1
L	CTC	0.269652	0.19602	0.0298507	0.137313	0.457711	0.408955	0.916418	0.746269	0.991045	0.78806		L	CTC	0.0109453	0.171144	0.00497512	0.59602	0.866667	0.824876	0.279602	0.946269	0.307463	0.682587		L	CTC	0.360199	0.00895522	0.210945	0.0676617	0.564179	0.708458	0.252736	0.0706468	0.381095	1		L	CTC	1	0.0457711	0.163184	0.0039801	0.0159204	0.0855721	0.212935	0.231841	0.231841
L	CTT	0.0039801	0.282587	0.707463	0.81393	0.725373	0.561194	0.453731	0.59801	0.633831	0.872637		L	CTT	0.244776	0.639801	0.156219	0.773134	0.000995025	0.891542	0.728358	0.0606965	0.81393	0.614925		L	CTT	0.940299	0.80199	0.451741	0.40796	0.334328	0.343284	0.578109	0	0.38209	1		L	CTT	0.969154	0.993035	1	0.989055	0.624876	1	0.969154	0.325373	0.949254
L	CTA	0.216915	0.538308	0.895522	0.339303	0.110448	0.635821	0.511443	0.128358	0.39005	0.926368		L	CTA	0.0258706	0.0845771	0.0716418	0.366169	0.0567164	0.0626866	0.0656716	0.0139303	0.116418	0.258706		L	CTA	1	0.637811	0.941294	0.255721	0.3801	0.835821	0.445771	0.744279	0.0945274	0.160199		L	CTA	1	1	1	1	1	1	1	1	0.999005
L	CTG	0.902488	0.301493	0.939303	0.200995	0.289552	0.504478	0.683582	0.39204	0.328358	0.802985		L	CTG	0.375124	0.513433	0.968159	0.0129353	0.78408	0.668657	0.725373	0.254726	0.742289	0.485572		L	CTG	0.0368159	0.0258706	0.741294	0.620896	0.316418	0.18607	0.623881	0.078607	0.561194	0.983085		L	CTG	0.0457711	0.222886	0.126368	0.0507463	0.128358	0.080597	0.686567	0.136318	0.0467662
H	CAC	0.314428	0.951244	0.979104	0.545274	0.987065	0.976119	0.943284	0.99801	0.847761	0.751244		H	CAC	0.437811	0.503483	0.522388	0.454726	0.741294	0.728358	0.0955224	0.762189	0.502488	0.913433		H	CAC	0	0.204975	0.00298507	0.0497512	0.505473	0.450746	0.193035	0.191045	0.0129353	0.59602		H	CAC	0	0.00199005	0.242786	0.0845771	0.0736318	0.187065	0.262687	0.0606965	0.177114
H	CAT	0.40995	0.923383	1	0.348259	0.98209	0.679602	0.910448	0.99602	0.965174	0.557214		H	CAT	0.185075	0.742289	0.313433	0.779104	0.519403	0.286567	0.452736	0.226866	0.297512	0.293532		H	CAT	0.935323	0.80597	0.464677	0.233831	0.692537	0.668657	0.446766	0.457711	0.0656716	0.748259		H	CAT	0	0.716418	0.497512	0.455721	0.275622	0.831841	0.457711	0.279602	0.60199
Q	CAA	0.963184	0.99602	0.727363	0.888557	0.527363	0.80199	0.98607	0.975124	0.748259	0.99801		Q	CAA	0.682587	0.928358	0.949254	0.871642	0.570149	0.516418	0.0606965	0.118408	0.114428	0.570149		Q	CAA	0.769154	0.565174	0.0716418	0.578109	0.366169	0.377114	0.155224	0.0517413	0.249751	0.039801		Q	CAA	0	0.0666667	0.0756219	0.0278607	0.158209	0.39801	0.562189	0.0557214	0.0646766
Q	CAG	0.974129	0.775124	0.168159	0.0835821	0.311443	0.861692	0.808955	0.572139	0.0378109	0.8199		Q	CAG	0.691542	0.985075	0.690547	0.161194	0.678607	0.522388	0.000995025	0.0248756	0.640796	0.295522		Q	CAG	0.933333	0.981095	0.60995	0.163184	0.539303	0.823881	0.0218905	0.175124	0.0238806	0.243781		Q	CAG	0	0.6199	0.393035	0.709453	0.310448	0.59602	0.120398	0.387065	0.0895522
R	CGC	0.127363	0.893532	0.254726	0.618905	1	0.99801	0.914428	0.775124	0.98806	0.170149		R	CGC	0.344279	0.150249	0	0.930348	0.039801	0.105473	0.310448	0.245771	1	0.999005		R	CGC	0	0	0	0	0.391045	0.0109453	0.576119	0.307463	0.800995	0.742289		R	CGC	0.662687	0.000995025	0	0	0	0.00298507	0.0487562	0.0039801	0.00199005
R	CGT	0.938308	1	0.456716	0.702488	1	0.967164	0.286567	0.620896	0.98209	0.851741		R	CGT	0.103483	0.18607	0.58209	0.9801	0.672637	0.349254	0.40597	0.459701	1	0.972139		R	CGT	0	0.138308	0.172139	0.295522	0.474627	0.0497512	0.644776	0.290547	0.104478	0.757214		R	CGT	0.0656716	0.00696517	0.124378	0.0517413	0	0.295522	0.0039801	0.00895522	0.0527363
R	CGA	0.103483	0.528358	0.99005	0.250746	0.968159	0.851741	0.667662	0.0497512	0.894527	0.039801		R	CGA	0.566169	0.527363	0.670647	0.156219	0.850746	0.150249	0.00497512	0.18209	0.970149	0.951244		R	CGA	1	1	1	1	1	1	0.99005	0.538308	0.989055	1		R	CGA	0.0039801	0.98408	0.99005	0.806965	0.40995	0.546269	0.81592	0.822886	0.989055
R	CGG	0	0.0328358	0.812935	0.146269	0.627861	0.9801	0.539303	0.575124	0.0955224	0.872637		R	CGG	0.000995025	0.0149254	0.00199005	0.0258706	0	0	0.00199005	0.00995025	0.987065	0.719403		R	CGG	0	0.00199005	0.0666667	0	0.00696517	0.0308458	0.00298507	0	0.0527363	0		R	CGG	1	0.0756219	0.000995025	0	0.0109453	0.0537313	0.162189	0	0.122388
S	TCC	0.806965	0.0079602	0.371144	0.131343	0.226866	0.557214	0.916418	0.999005	0.20398	0.61791		S	TCC	0.111443	0	0.908458	0.753234	0.253731	0.437811	0.991045	1	0.777114	0.366169		S	TCC	0.970149	0.00497512	0.150249	0.0179104	0.108458	0.0039801	0.0587065	0.711443	0.818905	0.327363		S	TCC	1	0.0149254	0.322388	0.0109453	0.0348259	0.399005	0.00696517	0.0199005	0.0119403
S	TCT	0.995025	0.952239	0.931343	0.151244	0.151244	0.283582	0.0348259	0.844776	0.977114	0.266667		S	TCT	0.60796	0.500498	0.955224	0.6	0.919403	0.625871	0.078607	0.869652	0.310448	0.81791		S	TCT	0.99204	0.814925	0.519403	0.352239	0.105473	0.223881	0.288557	0.0736318	0.104478	0.777114		S	TCT	0	0.00895522	0.928358	0.323383	0.406965	0.276617	0.121393	0.395025	0.0666667
S	TCA	0.963184	0.965174	0.632836	0.910448	0.875622	0.389055	0.549254	0.599005	0.235821	0.297512		S	TCA	0.989055	0.836816	0.400995	0.475622	0.579104	0.645771	0.882587	0.0368159	0.124378	0.763184		S	TCA	1	0.98806	1	0.913433	0.926368	0.374129	0.21592	0.781095	0.829851	0.108458		S	TCA	0	0.298507	0.979104	0	0.591045	0.370149	0.366169	0.585075	0.041791
S	TCG	0.0039801	0.0039801	0.318408	0.832836	0.903483	0.000995025	0.0895522	0.0885572	0.0756219	0.756219		S	TCG	0.503483	0.39204	0.175124	0.644776	0.475622	0.124378	0.0328358	0.918408	0.0129353	0.853731		S	TCG	1	0.78408	0.995025	0.950249	0.631841	0.59801	0.0646766	0.450746	0.58806	0.360199		S	TCG	0.689552	0.61592	0.999005	0.751244	0.953234	0.700498	0.0079602	0.911443	0.175124
F	TTC	1	0.999005	0.956219	0.978109	0.670647	0.859701	0.981095	1	0.775124	0.723383		F	TTC	1	0.969154	0.98408	0.723383	0.979104	0.309453	0.19602	0.375124	0.550249	0.21592		F	TTC	0.349254	0.0159204	0.889552	0.533333	0.78607	0.772139	0.724378	0.433831	0.957214	0.19602		F	TTC	1	0	0.0467662	0	0	0.0119403	0.00995025	0.000995025	0.00199005
F	TTT	1	0.997015	0.797015	0.938308	0.20199	0.98209	0.434826	0.985075	0.20995	0.60995		F	TTT	1	0.718408	0.81592	0.0626866	0.814925	0.132338	0.0497512	0.752239	0.80199	0.080597		F	TTT	1	0.544279	0.653731	0.371144	0.860697	0.0527363	0.235821	0.4199	0.959204	0.869652		F	TTT	0	0	0.577114	0.00298507	0.0039801	0.00895522	0.0915423	0.0577114	0.458706
L	TTA	1	0.660697	0.38607	0.665672	0.960199	0.59602	0.222886	0.752239	0.676617	0.993035		L	TTA	1	0.684577	0.964179	0.0935323	0.391045	0.20199	0.873632	0.281592	0.478607	0.193035		L	TTA	0.964179	0.263682	0.863682	0.972139	0.19801	0.591045	0.372139	0.756219	0.274627	0.748259		L	TTA	0	0.00497512	0.972139	0.965174	0.972139	0.427861	0.224876	0.731343	0.577114
L	TTG	1	0.397015	0.824876	0.272637	0.7801	0.0706468	0.272637	0.120398	0.294527	0.6199		L	TTG	1	0.0308458	0.871642	0.904478	0.642786	0.191045	0.228856	0.320398	0.19005	0.229851		L	TTG	1	0.0169154	0.867662	0.58209	0.21592	0.774129	0.252736	0.445771	0.285572	0.446766		L	TTG	0.978109	0.0228856	0.507463	0.849751	0.195025	0.412935	0.296517	0.00298507	0.183085
Y	TAC	0.772139	0.651741	0.919403	0.266667	0.558209	0.781095	0.832836	0.230846	0.123383	0.79801		Y	TAC	0.634826	0.950249	0.733333	0.39403	0.60796	0.38408	0.735323	0.21194	0.102488	0.949254		Y	TAC	0.478607	0.799005	0.516418	0.976119	0.682587	0.610945	0.189055	0.739303	0.000995025	0.747264		Y	TAC	0	0	0.0338308	0.296517	0.304478	0.252736	0.802985	0.942289	0.271642
Y	TAT	0.18209	0.99801	0.632836	0.876617	0.471642	0.222886	0.081592	0.568159	0.978109	0.126368		Y	TAT	0.0248756	0.651741	0.276617	0.39801	0.930348	0.258706	0.313433	0.078607	0.479602	0.293532		Y	TAT	0.0736318	0.989055	0.354229	0.484577	0.143284	0.833831	0.882587	0.124378	0.341294	1		Y	TAT	0	0.113433	0.561194	0.837811	0.995025	0.301493	0.758209	0.98806	0.455721
*	TAA	0	0	0.00199005	0.0527363	0	0	0	0	0.119403	0.0915423		*	TAA	0	0	0	0	0.0845771	0	0.000995025	0.00199005	0.000995025	0.0985075		*	TAA	0.278607	0	0	0	0	0.0746269	0	0	0.00199005	0		*	TAA	1	1	1	1	1	1	0.995025	1	1
*	TAG	0	0	0	0.0487562	0	0	0	0	0.0338308	0.0288557		*	TAG	0	0	0	0	0.0457711	0	0	0	0	0.0199005		*	TAG	0.269652	0	0	0	0	0.0567164	0	0	0	0		*	TAG	1	1	1	1	1	1	1	1	1
C	TGC	0.727363	0.814925	0.0895522	0.508458	0.760199	0.566169	0.178109	0.952239	0.319403	0.495522		C	TGC	0.702488	0.0318408	0.103483	0.273632	0.41791	0.189055	0.0258706	0.355224	0.602985	0.502488		C	TGC	0.0228856	0.0656716	0.0646766	0.4	0.142289	0.628856	0.109453	0.00597015	0.0587065	0.570149		C	TGC	0.0248756	0.00298507	0.00298507	0.0119403	0.0626866	0.0895522	0.19602	0.470647	0.783085
C	TGT	1	0.847761	0.227861	0.6199	0.975124	0.566169	0.944279	0.0328358	0.159204	0.340299		C	TGT	0.823881	0.909453	0.80597	0.126368	0.0119403	0.129353	0.274627	0.231841	0.000995025	0.268657		C	TGT	0.104478	0.0109453	0.686567	0.329353	0.0517413	0.149254	0.78806	0.0179104	0.690547	0.8199		C	TGT	0.433831	0.861692	0.781095	0.80398	0.643781	0.868657	0.679602	0.876617	0.583085
*	TGA	0	0	0	0.0328358	0	0	0	0	0.0427861	0.0646766		*	TGA	0	0	0	0	0.040796	0	0	0	0	0.039801		*	TGA	0.19204	0	0	0	0	0.0517413	0	0	0	0		*	TGA	1	1	1	1	1	1	1	1	1
W	TGG	0.985075	0.337313	0.279602	0.225871	0.0696517	0.0736318	0.372139	0.38607	0.666667	0.892537		W	TGG	0.00199005	0.747264	0.606965	0.00696517	0.0955224	0.000995025	0.18408	0.00199005	0.080597	0.149254		W	TGG	0.0656716	0.00497512	0.0507463	0.58806	0.0208955	0.0547264	0.306468	0.000995025	0.0268657	0.58209		W	TGG	1	0.319403	0.267662	0.129353	0.513433	0.247761	0.706468	0.149254	0.242786
T	ACC	0.711443	0.98209	0.303483	1	0.987065	0.515423	0.978109	0.985075	0.495522	0.40199		T	ACC	0.59602	0.978109	0.693532	0.268657	0.912438	0.293532	0.467662	0.775124	0.747264	0.956219		T	ACC	0	0.326368	0.787065	0.367164	0.335323	0.20199	0.679602	0.00497512	0.734328	0.324378		T	ACC	0	0	0.0298507	0	0	0.0447761	0.222886	0.179104	0.0348259
T	ACT	0.999005	0.993035	0.98408	0.884577	0.491542	0.111443	0.99801	0.724378	0.489552	0.383085		T	ACT	0.81194	0.985075	0.177114	0.456716	0.955224	0.173134	0.20796	0.20995	0.484577	0.296517		T	ACT	0.733333	0.891542	0.266667	0.989055	0.843781	0.734328	0.134328	0.20199	0.604975	0.145274		T	ACT	0	0	0.000995025	0.0139303	0.0228856	0.430846	0.312438	0.280597	0.237811
T	ACA	0.762189	0.924378	0.468657	0.971144	0.672637	0.891542	0.316418	0.40199	0.0855721	0.129353		T	ACA	0.79005	0.919403	0.886567	0.778109	0.624876	0.3801	0.701493	0.0865672	0.0626866	0.673632		T	ACA	0.995025	0.901493	0.885572	0.977114	0.905473	0.81194	0.185075	0.235821	0.104478	0.346269		T	ACA	0	0.779104	0.99801	1	1	1	1	0.999005	0.970149
T	ACG	0.041791	0.160199	0.766169	0.873632	0.348259	0.357214	0.19005	0.58209	0.172139	0.18408		T	ACG	0.113433	0.231841	0.479602	0.0865672	0.0626866	0.265672	0.185075	0.102488	0.173134	0.660697		T	ACG	0.223881	0.766169	0.924378	0.171144	0.99204	0.282587	0.0258706	0.457711	0.335323	0.038806		T	ACG	0	1	1	0.99403	0.99801	0.99204	0.669652	0.995025	0.989055
I	ATC	0.744279	0.908458	0.80995	0.80199	0.941294	0.929353	0.508458	0.993035	0.420896	0.896517		I	ATC	0.781095	0.789055	0.951244	0.8199	0.557214	0.625871	0.214925	0.59005	0.59801	0.428856		I	ATC	0	0.438806	0.853731	0.727363	0.397015	0.227861	0.874627	0.468657	0.290547	0.273632		I	ATC	0	0	0.0149254	0.0179104	0.000995025	0.0447761	0.114428	0.00995025	0.000995025
I	ATT	0.98806	0.999005	0.839801	0.896517	0.774129	0.653731	0.143284	0.556219	0.634826	0.458706		I	ATT	0.99005	0.99005	0.971144	0.558209	0.956219	0.647761	0.877612	0.139303	0.455721	0.218905		I	ATT	0.435821	0.797015	0.793035	0.907463	0.532338	0.625871	0.284577	0.0447761	0.365174	0.724378		I	ATT	0	0.0776119	0.248756	0.60995	0.292537	0.181095	0.00995025	0.489552	0.0626866
I	ATA	0.385075	0.900498	0.957214	0.831841	0.424876	0.0825871	0.38806	0.691542	0.0716418	0.183085		I	ATA	0.944279	0.963184	0.908458	0.897512	0.271642	0.131343	0.546269	0.565174	0.223881	0.318408		I	ATA	1	0.997015	0.903483	1	0.447761	0.918408	0.229851	0.275622	0.079602	0.958209		I	ATA	0	0.958209	1	0.99204	1	0.99801	0.317413	0.935323	0.437811
M	ATG	0.864677	0.826866	0.942289	0.921393	0.80995	0.146269	0.616915	0.0129353	0.479602	0.99602		M	ATG	0	0.742289	0.983085	0.230846	0.163184	0.421891	0.462687	0.18806	0.315423	0.704478		M	ATG	0	0.00696517	0.0537313	0.267662	0	0	0	0.0577114	0.0109453	0.246766		M	ATG	1	0.754229	0.0308458	0.0995025	0.256716	0.276617	0.0308458	0.364179	0.0636816
N	AAC	0.829851	0.438806	0.957214	0.892537	0.99204	0.936318	0.120398	0.932338	0.404975	0.468657		N	AAC	0.628856	0.825871	0.767164	0.081592	0.831841	0.716418	0.770149	0.39801	0.0527363	0.554229		N	AAC	0.969154	0.923383	0.955224	0.961194	0.904478	0.281592	0.248756	0.171144	0.837811	0.558209		N	AAC	0	0.0039801	0.78408	1	0.61393	0.868657	0.612935	0.60199	0.353234
N	AAT	0.274627	0.997015	0.621891	0.779104	0.536318	0.883582	0.0248756	0.496517	0.877612	0.907463		N	AAT	0.649751	0.21592	0.726368	0.914428	0.41393	0.4199	0.00298507	0.00199005	0.218905	0.608955		N	AAT	0.999005	1	0.956219	0.910448	0.756219	0.828856	0.141294	0.174129	0.159204	0.424876		N	AAT	0	1	1	1	1	0.99204	0.99403	0.985075	0.981095
K	AAA	0.836816	1	0.9801	0.673632	0.700498	0.989055	0.685572	0.860697	0.0716418	0.724378		K	AAA	0.999005	1	0.976119	0.765174	0.706468	0.80995	0.0228856	0.297512	0.156219	0.358209		K	AAA	0.304478	0.633831	0.99602	0.931343	0.720398	0.662687	0.305473	0.865672	0.339303	0.133333		K	AAA	0	0.00696517	0.79204	0.978109	0.842786	0.935323	0.703483	0.553234	0.664677
K	AAG	0.730348	0.999005	0.39602	0.893532	0.548259	0.5801	0.699502	0.478607	0.345274	0.774129		K	AAG	0.863682	0.658706	0.976119	0.437811	0.363184	0.581095	0.0228856	0.668657	0.355224	0.459701		K	AAG	0.837811	1	0.559204	0.469652	0.917413	0.479602	0.39204	0.00597015	0.115423	0.377114		K	AAG	0	0.849751	1	1	1	0.966169	0.987065	0.758209	0.741294
S	AGC	0.334328	0.928358	0.950249	0.659701	0.187065	0.876617	0.310448	0.777114	0.701493	0.274627		S	AGC	0.698507	0.965174	0.972139	0.38607	0.547264	0.739303	0.706468	0.137313	0.132338	0.462687		S	AGC	0.353234	0.714428	0.126368	0.985075	0.834826	0.346269	0.1801	0.230846	0.0278607	0.387065		S	AGC	0	0.597015	0.237811	0.458706	0.626866	0.345274	0.2199	0.0636816	0.107463
S	AGT	0.0169154	0.0606965	0.695522	0.517413	0.104478	0.0726368	0.378109	0.00199005	0.121393	0.116418		S	AGT	0.0985075	0.771144	0.0587065	0.18209	0.395025	0.143284	0.645771	0.225871	0.0378109	0.102488		S	AGT	1	0.944279	0.400995	0.962189	0.125373	0.835821	0.0199005	0.222886	0.0039801	0.170149		S	AGT	0.103483	1	1	1	1	1	0.99602	1	0.993035
R	AGA	0.150249	0.263682	1	0.968159	0.210945	0.585075	0.347264	0.448756	0.869652	0.752239		R	AGA	0.688557	0.510448	0.338308	0.153234	0.230846	0.0567164	0.0358209	0.0278607	0.223881	0.644776		R	AGA	0.993035	0.989055	0.999005	0.834826	0.311443	0.946269	0.60398	0.0686567	0.19005	0.814925		R	AGA	0	1	1	1	1	1	0.977114	1	1
R	AGG	0.0119403	0.372139	0.0179104	0.955224	0.880597	0.912438	0.232836	0.481592	0.334328	0.334328		R	AGG	0.0975124	0.210945	0.00497512	0.00995025	0.0039801	0.117413	0	0.0467662	0.818905	0.292537		R	AGG	0.0537313	0.942289	0.695522	0.298507	0.548259	0.0129353	0.0358209	0.0149254	0.121393	0.746269		R	AGG	0.810945	0.995025	0.999005	1	1	0.966169	0.970149	0.997015	0.98607
A	GCC	0.18209	0.0129353	0.250746	0.564179	0.359204	0.870647	0.965174	0.633831	0.880597	0.761194		A	GCC	0.587065	0.00199005	0.896517	0.674627	0.652736	0.898507	0.833831	0.98806	0.393035	0.500498		A	GCC	0.99204	0.127363	0.0169154	0.274627	0.739303	0.038806	0.0626866	0.138308	0.0646766	0		A	GCC	1	0.00298507	0.444776	0.0447761	0.00597015	0.0179104	0.423881	0.0547264	0.00298507
A	GCT	0.240796	0.0756219	0.991045	0.40796	0.952239	0.924378	0.538308	0.769154	0.762189	0.293532		A	GCT	0.100498	0.997015	0.997015	0.98408	0.249751	0.975124	0.859701	0.927363	0.369154	0.59005		A	GCT	0.808955	0.376119	0.0656716	0.0577114	0.956219	0.183085	0.136318	0.00597015	0.0457711	0.484577		A	GCT	0.38607	0.00497512	0.000995025	0.00497512	0	0.00298507	0.0109453	0.00497512	0.0348259
A	GCA	0.999005	0.890547	0.99403	0.39801	0.840796	0.112438	0.123383	0.810945	0.554229	0.731343		A	GCA	0.99602	0.971144	0.99801	0.98408	0.147264	0.630846	0.638806	0.315423	0.230846	0.903483		A	GCA	0.759204	0.265672	0.534328	0.270647	0.749254	0.379104	0.0975124	0.309453	0.319403	0.269652		A	GCA	0	0	0.0507463	0	0	0.0477612	0.0139303	0.189055	0.0039801
A	GCG	0.120398	0.339303	0.118408	0.0119403	0.0109453	0.0756219	0.0228856	0.116418	0.406965	0.122388		A	GCG	0.105473	0.439801	0.400995	0.289552	0.315423	0.957214	0.951244	0.268657	0.58607	0.59204		A	GCG	0.79005	0.751244	0.125373	0.0079602	0	0.0159204	0.223881	0.080597	0.178109	0		A	GCG	1	0.0159204	0.0606965	0.0457711	0.287562	0.514428	0.0955224	0.0039801	0.149254
V	GTC	0.662687	0.704478	0.945274	0.972139	0.621891	0.756219	0.975124	0.20796	0.948259	0.0626866		V	GTC	0.995025	0.889552	0.20398	0.639801	0.901493	0.922388	0.462687	0.795025	0.395025	0.581095		V	GTC	0.296517	0.221891	0.00199005	0.400995	0.565174	0.127363	0.863682	0.00696517	0.512438	0.0945274		V	GTC	0	0	0	0	0	0.00298507	0.237811	0	0
V	GTT	0.0278607	0.758209	0.99005	0.0109453	0.959204	0.904478	0.336318	0.925373	0.864677	0.275622		V	GTT	0.656716	0.61194	0.891542	0.61393	0.485572	0.914428	0.552239	0.886567	0.968159	0.98209		V	GTT	0.557214	0.58209	0.246766	0.719403	0.210945	0.0179104	0.321393	0.0427861	0.131343	0.842786		V	GTT	0.0616915	0	0.000995025	0	0.000995025	0.0965174	0.0626866	0.0348259	0.00298507
V	GTA	0.997015	0.947264	0.450746	0.522388	0.39204	0.915423	0.294527	0.700498	0.323383	0.232836		V	GTA	0.99204	0.901493	0.78408	0.561194	0.634826	0.141294	0.1801	0.080597	0.747264	0.216915		V	GTA	0.894527	0.0179104	0.872637	0.147264	0.333333	0.0477612	0.101493	0.257711	0.18408	0.237811		V	GTA	0	0	0.0328358	0.0169154	0.0567164	0.254726	0	0.0238806	0.21393
V	GTG	0.892537	0.0965174	0.599005	0.851741	0.375124	0.635821	0.899502	0.00597015	0.898507	0.455721		V	GTG	0.323383	0.0169154	0.892537	0.579104	0.327363	0.573134	0.00298507	0	0.874627	0.554229		V	GTG	0.00597015	0.00199005	0.299502	0.158209	0.128358	0.0955224	0.000995025	0	0.0686567	0		V	GTG	0.58209	0	0	0.00497512	0.0139303	0	0.00597015	0	0.0039801
D	GAC	0.61393	0.894527	0.227861	0.987065	0.595025	0.646766	0.183085	0.00497512	0.585075	0.0696517		D	GAC	1	0.995025	0.999005	0.967164	0.971144	0.848756	0.910448	0.59403	0.0179104	0.78607		D	GAC	0.98607	0.962189	0.358209	0.973134	0.597015	0.163184	0.0268657	0.402985	0.132338	0.0945274		D	GAC	0	0.247761	0.248756	0.230846	0.465672	0.545274	0.867662	0.657711	0.21194
D	GAT	0.937313	0.999005	0.981095	0.967164	0.124378	0.628856	0.318408	0.0258706	0.0447761	0.507463		D	GAT	0.99204	0.999005	0.920398	0.973134	0.312438	0.864677	0.2199	0.246766	0.0587065	0.383085		D	GAT	1	0.999005	0.993035	0.530348	0.61592	0.423881	0.41791	0.0179104	0.0039801	0.604975		D	GAT	0	0.958209	1	0.945274	0.974129	0.945274	0.997015	0.568159	0.464677
E	GAA	0.904478	0.969154	0.816915	0.670647	0.0706468	0.561194	0.369154	0.59403	0.573134	0.889552		E	GAA	0.999005	0.99801	0.885572	0.532338	0.810945	0.931343	0.678607	0.0766169	0.481592	0.345274		E	GAA	1	1	0.9801	0.690547	0.98806	0.21592	0.0656716	0.309453	0.259701	0.041791		E	GAA	0	0.722388	0.98408	0.942289	0.816915	0.120398	0.189055	0.850746	0.18607
E	GAG	0.0716418	0.976119	0.381095	0.425871	0.566169	0.650746	0.641791	0.310448	0.199005	0.18408		E	GAG	0.256716	0.547264	0.826866	0.355224	0.449751	0.0378109	0.041791	0.572139	0.0845771	0.000995025		E	GAG	1	1	0.364179	0.655721	0.432836	0.0179104	0.0577114	0.238806	0.00199005	0		E	GAG	0.306468	0.872637	0.999005	0.99005	0.99602	0.293532	0.0935323	0.486567	0.883582
G	GGC	0.00199005	0.152239	0.00497512	0.378109	0.543284	0.0199005	0.635821	0.297512	0.117413	0.039801		G	GGC	0.00298507	0.0149254	0.000995025	0.750249	0.225871	0.323383	0.791045	0.59801	0	0.367164		G	GGC	0.039801	0.0218905	0	0.519403	0.423881	0.0855721	0.296517	0.526368	0.00597015	0.0079602		G	GGC	1	0	0	0	0	0	0.185075	0	0.000995025
G	GGT	0	0.772139	0.0646766	0.495522	0.0368159	0.120398	0.0825871	0.0915423	0.0756219	0.101493		G	GGT	0.0149254	0.953234	0.277612	0.568159	0.173134	0.926368	0.79204	0.178109	0.0169154	0.00199005		G	GGT	0.804975	0.955224	0.477612	0.152239	0.00995025	0.306468	0.0248756	0.322388	0.0467662	0.0298507		G	GGT	1	0	0.610945	0.00298507	0.0079602	0.125373	0.20398	0.119403	0.118408
G	GGA	0.148259	0.945274	0.58209	0.655721	0.259701	0.0079602	0.00199005	0.525373	0.520398	0.312438		G	GGA	0.311443	0.997015	0.771144	0.550249	0.443781	0.917413	0.877612	0.0646766	0.110448	0.0218905		G	GGA	0.675622	0.965174	1	0.955224	0.59005	0.834826	0.509453	0.21791	0.732338	0.0766169		G	GGA	0.148259	0.00199005	0.614925	0.0905473	0.0199005	0	0.041791	0.315423	0.890547
G	GGG	0	0	0.101493	0.0039801	0.251741	0.0646766	0.360199	0.0467662	0	0.0716418		G	GGG	0	0.00696517	0	0.00895522	0.00895522	0.0139303	0.132338	0.139303	0.00199005	0		G	GGG	0.0925373	0.0039801	0	0	0.000995025	0.000995025	0.0228856	0.294527	0.00597015	0		G	GGG	1	0.134328	0	0	0	0.000995025	0.348259	0	0.0039801
[truncated: 12 more columns]

## Sheet: Heatmap for codons in sites
Stop efficiency at the corresponging triplet while located in the ribosome sites								P-values for shuffled datasets exceeding experimental data of stop efficiency at the corresponging triplet while located in the ribosome sites
		Ribosome sites								Ribosome sites
		-2	E	P	A	2				-2	E	P	A	2
P	CCC	-0.0226482	-0.0328406	-0.0426837	-0.00144182	-0.00411721		P	CCC	0	1	1	1	1
P	CCT	-0.0224127	-0.0339227	-0.0410318	0.00429906	0.0122354		P	CCT	0	1	1	1	1
P	CCA	-0.0252666	-0.0407088	-0.0494141	0.0226479	0.0245078		P	CCA	0.0626866	1	1	0	0.480597
P	CCG	-0.0244174	-0.0361028	-0.0422052	0.0139056	0.0154494		P	CCG	0.000995025	1	1	1	1
L	CTC	-0.0249134	-0.0271853	-0.028349	0.00598704	0.00416205		L	CTC	0.340299	0.202985	0.263682	0.955224	1
L	CTT	-0.0257029	-0.026464	-0.0301884	0.0025999	0.018298		L	CTT	0.471642	0.170149	0.853731	1	0.898507
L	CTA	-0.0259339	-0.0196571	-0.0317025	-0.0274634	0.0314261		L	CTA	0.364179	0	0.967164	1	0
L	CTG	-0.0269827	-0.0291305	-0.0267607	0.019699	0.0309666		L	CTG	0.643781	0.595025	0.105473	0.000995025	0.00895522
H	CAC	-0.0307152	-0.0293316	-0.0235517	0.0196855	0.0251574		H	CAC	1	0.759204	0	0	0
H	CAT	-0.0334263	-0.0288329	-0.0304765	0.0190124	0.0655502		H	CAT	1	0.286567	0.800995	0	0
Q	CAA	-0.0360355	-0.0313759	-0.0258654	0.0340905	0.0675421		Q	CAA	1	0.832836	0.103483	0	0
Q	CAG	-0.0265012	-0.0288381	-0.0298533	0.0110364	0.0356259		Q	CAG	0.535323	0.379104	0.61393	0	0
R	CGC	-0.0283095	-0.0290527	-0.0185412	0.02512	0.00536092		R	CGC	0.991045	0.666667	0	0	1
R	CGT	-0.0330131	-0.0314187	-0.0208815	0.0313976	0.0294879		R	CGT	1	0.972139	0	0	0.256716
R	CGA	-0.0268291	-0.0288613	-0.0501276	0.0128325	0.0224674		R	CGA	0.614925	0.579104	1	0.692537	0.0159204
R	CGG	-0.0255502	-0.0225688	-0.0183121	0.0170917	0.021784		R	CGG	0.0606965	0	0	0.349254	0.98607
S	TCC	-0.0255726	-0.029389	-0.0262197	0.011214	-0.00350309		S	TCC	0.522388	0.80597	0.0169154	0.381095	1
S	TCT	-0.0297183	-0.0312565	-0.0285008	0.0402862	0.0289154		S	TCT	0.939303	0.938308	0.638806	0	0.151244
S	TCA	-0.0313174	-0.0300416	-0.0373808	0.0475604	0.0354914		S	TCA	0.98209	0.770149	1	0	0
S	TCG	-0.0230787	-0.0276574	-0.0350554	0.011151	0.0180239		S	TCG	0.00199005	0.162189	1	0.978109	0.0308458
F	TTC	-0.0330669	-0.0307964	-0.0302766	0.0172485	0.0138473		F	TTC	1	1	0.689552	0	0.127363
F	TTT	-0.0349222	-0.0276076	-0.0263429	0.0929877	0.0632492		F	TTT	1	1	0.920398	0	0.00895522
L	TTA	-0.0337068	-0.0267843	-0.0301321	0.0957983	0.0599239		L	TTA	1	0.991045	0.954229	0	0
L	TTG	-0.0245324	-0.0273052	-0.0277763	0.0233313	0.042538		L	TTG	0.976119	0.774129	0.531343	0.364179	0.344279
Y	TAC	-0.0258625	-0.0296661	-0.0311397	0.0145174	0.0303344		Y	TAC	0.766169	0.816915	0.723383	0	0.00199005
Y	TAT	-0.0323836	-0.0292699	-0.0295491	0.04595	0.142756		Y	TAT	0.928358	0.178109	0.844776	0.0179104	0
*	TAA	0	0	0	-0.150022	0.0805701		*	TAA	0	0	0	1	0.437811
*	TAG	0	0	0	-0.124684	0.0361424		*	TAG	0	0	0	1	0.99801
C	TGC	-0.0255982	-0.02552	-0.0245095	0.0163613	0.00537785		C	TGC	0.61393	0.0328358	0	0	0.789055
C	TGT	-0.0278585	-0.0238863	-0.0224251	0.0447378	0.0319765		C	TGT	1	0.0328358	0.0189055	0.920398	0.292537
*	TGA	0	0	0	-0.112721	0.00873792		*	TGA	0	0	0	1	1
W	TGG	-0.0238575	-0.0228176	-0.0214357	0.01743	0.027164		W	TGG	0.316418	0	0	0.99801	0.385075
T	ACC	-0.0302517	-0.0303766	-0.0242452	0.015137	0.00825497		T	ACC	1	0.978109	0.00199005	0	0.041791
T	ACT	-0.0343558	-0.029489	-0.0295312	0.052172	0.0346223		T	ACT	1	0.758209	0.872637	0	0
T	ACA	-0.0306732	-0.0304146	-0.031985	0.0358367	0.0490412		T	ACA	0.912438	0.876617	0.997015	0.257711	0
T	ACG	-0.0249255	-0.0244755	-0.0286971	0.000296874	0.0240774		T	ACG	0.174129	0.00895522	0.40199	1	0
I	ATC	-0.0307865	-0.0308257	-0.0253139	0.0377522	0.0205914		I	ATC	0.99801	0.923383	0.0228856	0	0
I	ATT	-0.0373838	-0.036931	-0.0268249	0.102518	0.0781727		I	ATT	1	1	0.727363	0	0
I	ATA	-0.0326751	-0.0333789	-0.0476135	0.121973	0.092443		I	ATA	0.690547	0.969154	1	0	0
M	ATG	-0.0312381	-0.027182	0.00751752	0.0206902	0.0434386		M	ATG	0.981095	0.139303	0	0.862687	0
N	AAC	-0.0306163	-0.0302407	-0.0349624	0.0213884	0.0404024		N	AAC	0.993035	0.652736	0.99005	0	0
N	AAT	-0.0332861	-0.0296868	-0.0390405	0.0183068	0.124504		N	AAT	0.942289	0.206965	1	1	0
K	AAA	-0.0401853	-0.0396086	-0.0296724	0.091106	0.118587		K	AAA	1	1	0.888557	0	0
K	AAG	-0.0312954	-0.0317469	-0.0333448	0.00704404	0.0615083		K	AAG	0.974129	0.764179	0.903483	0.973134	0
S	AGC	-0.0269204	-0.0293851	-0.0285053	0.012449	0.0141507		S	AGC	0.906468	0.847761	0.327363	0	0
S	AGT	-0.0225684	-0.0242893	-0.0309136	0.0212943	0.039153		S	AGT	0	0.0079602	0.946269	1	0
R	AGA	-0.031304	-0.0251532	-0.0346381	0.0362528	0.0422673		R	AGA	0.845771	0.0278607	1	1	0
R	AGG	-0.0252945	-0.0206528	-0.0248991	0.000498616	0.0248212		R	AGG	0.197015	0	0.0129353	1	0
A	GCC	-0.025716	-0.0295466	-0.0260667	0.0129226	0.00672534		A	GCC	0.535323	0.863682	0.00199005	0.0776119	0.997015
A	GCT	-0.0280239	-0.0329695	-0.0260825	0.0276678	0.0279011		A	GCT	0.840796	0.99801	0.080597	0	0.00298507
A	GCA	-0.0306759	-0.0335036	-0.0272579	0.0424537	0.034245		A	GCA	0.993035	0.999005	0.320398	0	0
A	GCG	-0.0224019	-0.0289603	-0.0238341	0.0147953	0.0268357		A	GCG	0	0.402985	0	0.608955	0.081592
V	GTC	-0.0286042	-0.0312268	-0.0261407	0.0283287	0.0180699		V	GTC	0.995025	0.971144	0.00597015	0	0.0149254
V	GTT	-0.028469	-0.034429	-0.025742	0.0507135	0.0469062		V	GTT	0.693532	0.99403	0.123383	0	0.362189
V	GTA	-0.0310438	-0.0313567	-0.0244103	0.0665924	0.0443261		V	GTA	0.957214	0.844776	0.0736318	0	0
V	GTG	-0.0270121	-0.0277905	-0.0184921	0.0312055	0.0392441		V	GTG	0.58607	0.0497512	0	0	0.987065
D	GAC	-0.0254233	-0.0357344	-0.0307172	0.0101511	0.0212941		D	GAC	0.537313	1	0.699502	0.00298507	0
D	GAT	-0.0335789	-0.0359504	-0.0371039	0.0317441	0.0831812		D	GAT	0.99204	0.995025	1	0.391045	0
E	GAA	-0.0308471	-0.0362074	-0.0395982	0.0390667	0.069572		E	GAA	0.949254	0.997015	1	0	0
E	GAG	-0.0260597	-0.0271854	-0.0300045	0.00151162	0.0522228		E	GAG	0.38806	0.0208955	0.606965	0.987065	0
G	GGC	-0.0221024	-0.025358	-0.0238455	0.0209636	0.0150909		G	GGC	0	0	0	0	0.113433
G	GGT	-0.022456	-0.0267454	-0.0253334	0.0377954	0.030606		G	GGT	0	0.0308458	0.0626866	0.874627	0.223881
G	GGA	-0.0251055	-0.0289854	-0.0321625	0.031216	0.0346002		G	GGA	0.142289	0.58607	0.993035	0	0
G	GGG	-0.0187808	-0.0195221	-0.0189446	0.0160107	0.0267127		G	GGG	0	0	0	1	0.997015

## Sheet: 2D codon heatmap
2-dimensional representation of stalling propensities with the corresponding codons located in the P- and A-sites
P\A		Codons located in the A-site
		CCC	CCT	CCA	CCG	CTC	CTT	CTA	CTG	CAC	CAT	CAA	CAG	CGC	CGT	CGA	CGG	TCC	TCT	TCA	TCG	TTC	TTT	TTA	TTG	TAC	TAT	TAA	TAG	TGC	TGT	TGA	TGG	ACC	ACT	ACA	ACG	ATC	ATT	ATA	ATG	AAC	AAT	AAA	AAG	AGC	AGT	AGA	AGG
P	CCC	-0.0742584	-0.0937976	-0.0665047	-0.0750439	-0.0294258	-0.0540164	-0.0721347	-0.0261425	-0.0324969	-0.0327991	-0.0287748	-0.0380512	-0.0283248	-0.0304043	-0.0391142	-0.028795	-0.0276126	-0.0208236	-0.0208843	-0.0233297	-0.0186508	-0.00334594	-0.040083	-0.0670665	-0.0144446	-0.0500758	-0.196571	-0.139989	-0.0415567	-0.054563	-0.140167	-0.0367678	-0.0328599	-0.0332091	-0.0726452	-0.0479488	-0.0261468	-0.0308337	-0.054926	-0.00439106	-0.0362366	-0.0823975	-0.0240675	-0.039835	-0.0340685	-0.0540434	-0.0606531	-0.0416777
P	CCT	-0.072039	-0.0634288	-0.0700611	-0.0467057	-0.00789075	-0.0541706	-0.0661395	-0.0221075	-0.034007	-0.011339	-0.00492299	-0.0442106	-0.00714994	-0.0218647	-0.0474649	-0.026309	-0.0354153	-0.0267696	-0.013343	-0.0376893	-0.036194	-0.00548249	-0.0383411	-0.0153922	-0.053208	-0.0590209	-0.122442	-0.192922	-0.0467525	-0.053192	-0.158814	-0.0501765	-0.0340799	-0.0561375	-0.0507087	-0.0335229	-0.0388054	-0.030891	-0.046638	-0.0295961	-0.0497805	-0.0746936	-0.0588672	-0.0614848	-0.052191	-0.0869161	-0.0549019	-0.0663337
P	CCA	-0.0894115	-0.0931268	-0.068615	-0.0838023	-0.0155065	-0.0467444	-0.0893437	-0.0241801	-0.0217819	-0.0291218	-0.030083	-0.0374419	-0.035127	-0.0341213	-0.035541	-0.0363385	-0.0259513	-0.0202352	-0.0327017	-0.0286313	-0.00816032	-0.00289242	-0.0348506	-0.0221817	-0.0343503	-0.0521849	-0.204785	-0.213377	-0.0510014	-0.0803031	-0.206343	-0.0501882	-0.0517009	-0.0147926	-0.0680861	-0.0570951	-0.00506234	-0.0591767	-0.0371206	-0.018798	-0.0573622	-0.11437	-0.0391372	-0.0699598	-0.0392142	-0.0924609	-0.0940027	-0.0745344
P	CCG	-0.0707877	-0.0690071	-0.0785804	-0.0762696	-0.0380244	-0.0651505	-0.0884842	-0.025804	-0.0377182	-0.0449554	-0.0368351	-0.0342512	-0.0303939	-0.0244411	-0.0597364	-0.0328022	-0.0315899	-0.027265	-0.02694	-0.0469814	-0.0173201	-0.0281265	-0.0394354	-0.0181566	-0.0197706	-0.0563956	-0.222269	-0.241016	-0.0360868	-0.0677906	-0.199667	-0.0499234	-0.02022	-0.022004	-0.0520237	-0.0414413	-0.0136603	-0.0318474	-0.0538371	-0.0352834	-0.0433631	-0.0857722	-0.0546112	-0.0642736	-0.0271323	-0.0719034	-0.0576056	-0.0496031
L	CTC	-0.0226902	-0.0311706	-0.0252737	-0.0215953	-0.011015	-0.0331896	-0.0308139	-0.00810827	-0.0196813	-0.0351379	0.0285633	-0.047217	-0.0148755	-0.0164988	-0.0379138	-0.0143638	-0.016214	-0.0247518	-0.0400994	-0.0375273	-0.0169396	-0.0166	-0.0301519	-0.030776	-0.0179657	-0.0394257	-0.0615228	-0.053693	-0.0151536	-0.00699041	-0.0921102	-0.0151928	0.00112406	-0.00161752	-0.037575	-0.0373402	-0.0140259	-0.0227475	-0.0551268	-0.0370644	-0.0501641	-0.0823923	-0.0474252	-0.0345373	-0.0291811	-0.11994	-0.135602	-0.0462175
L	CTT	-0.0329608	-0.0316293	-0.0122575	-0.00106967	-0.0296508	-0.0240185	-0.104653	-0.0387052	-0.00651817	-0.0294713	-0.0268914	-0.0392567	-0.0231373	-0.0124259	-0.0523949	-0.0131006	-0.0187586	-0.00920503	-0.0424411	-0.0306387	-0.0409733	0.0176479	-0.014233	-0.0240873	-0.00772635	-0.0137928	-0.115472	-0.128055	0.0155013	-0.0619233	-0.0707983	-0.0385925	-0.0265563	-0.0296518	-0.0443013	-0.041315	-0.0106435	-0.0255315	-0.0059063	-0.0345649	-0.0521756	-0.0835979	-0.0118093	-0.0637697	-0.049056	-0.0512565	-0.174756	-0.0522908
L	CTA	-0.0400761	-0.027881	-0.0196535	-0.0193767	-0.0357062	-0.0491813	-0.0709635	-0.0236497	-0.0470805	-0.0451383	-0.0232376	2.3209e-05	-0.0335326	-0.0326791	-0.0491221	-0.0379214	-0.0413347	-0.0105982	-0.0297811	-0.0481517	-0.0385181	-0.0315585	-0.0169737	-0.045187	-0.0409124	-0.0224354	-0.0669298	-0.0707509	-0.0176724	-0.0263068	-0.0776604	-0.00950393	-0.000843067	0.00259776	-0.0504857	-0.0147798	-0.00864536	-0.0737211	-0.0330985	-0.00069011	-0.0574584	-0.0997533	-0.0383334	-0.0354741	-0.0196373	-0.0562387	-0.16257	-0.0504208
L	CTG	-0.0243779	-0.0238798	-0.0300795	-0.00357147	-0.0202743	-0.0419347	-0.0926601	0.00465596	-0.0245237	-0.024538	-0.0106493	-0.0164896	-0.0092288	-0.0250214	-0.0307056	-0.0235375	-0.0201404	-0.017581	-0.0439434	-0.0310861	-0.0216157	-0.0048729	-0.0425238	-0.0395343	-0.0530878	0.00343458	-0.103385	-0.134194	-0.0191799	-0.0454369	-0.195464	-0.0256372	-0.0147725	-0.0204177	-0.0613131	-0.0678176	-0.0437474	-0.00523201	-0.0918836	-0.0163112	-0.0179472	-0.0788582	-0.0296301	-0.0800502	-0.0244004	-0.0533325	-0.175735	-0.0916441
H	CAC	-0.0250005	-0.0178912	0.00270597	-0.0202118	-0.0159128	-0.0289294	-0.047902	-0.0401887	-0.0170078	-0.0209828	-0.00672379	-0.00833955	-0.0199568	-0.00857105	-0.0302378	-0.0324545	-0.0120097	-0.00760629	-0.017674	-0.0340751	-0.019754	-0.0289335	-0.0284168	-0.0353801	-0.0340256	-0.0254471	-0.0591762	-0.0405498	-0.0252801	-0.0361123	-0.0721722	-0.00438279	-0.0168925	-0.00527723	-0.0242376	-0.0457823	-0.0125411	-0.0440376	-0.0508456	-0.0245559	-1.35778e-06	-0.0487914	-0.0367105	-0.0315392	-0.042173	-0.0501111	-0.0654115	-0.0389942
H	CAT	-0.0338453	-0.03248	-0.00779375	-0.0294866	-0.017256	-0.0483821	-0.0539519	-0.0209729	-0.0219362	-0.0251472	-0.0357572	-0.0154259	-0.0336123	-0.0234198	-0.0450421	-0.0226176	-0.0235183	-0.0217829	-0.0439178	-0.018359	-0.0322736	-0.016369	-0.0603796	-0.00982197	-0.0491424	-0.0496617	-0.112366	-0.0782729	-0.0348505	-0.0201209	-0.110391	-0.0249865	-0.0311946	-0.0405588	-0.0218769	-0.0532355	-0.0189523	-0.014287	-0.0722254	-0.0213306	-0.0180469	-0.0675204	-0.0280163	-0.0219007	-0.0203955	-0.116714	-0.071775	-0.0329957
Q	CAA	-0.0222044	-0.0159402	-0.0290218	-0.0337446	-0.00644196	-0.0595099	-0.0629677	-0.0228841	-0.0164428	-0.0182389	-0.0352261	-0.0570225	-0.0188804	-0.0178376	-0.0218949	-0.0212679	-0.00529402	-0.0322018	0.00517517	-0.0336836	0.0222864	0.000122412	-0.0129453	-0.0435158	-0.0344582	-0.0280607	-0.177911	-0.0967923	-0.00297766	-3.92285e-05	-0.131936	-0.0374239	-0.000337093	-0.003042	-0.0416753	-0.0250997	-0.00336282	-0.00395025	-0.0333182	-0.0132526	-0.00341811	-0.0521592	-0.00339054	-0.0309519	-0.0383337	-0.109623	-0.0148496	-0.0410143
Q	CAG	-0.0233819	-0.0427661	-0.00248377	-0.00924862	-0.0272506	-0.0377358	-0.0793342	-0.0307809	-0.0160819	-0.0376083	-0.00396098	-0.0428244	-0.00633963	-0.0299746	-0.0632197	-0.0191342	-0.027294	-0.038217	0.00741306	-0.0295619	-0.0389664	-0.0370757	-0.0334376	-0.0316978	-0.0348065	-0.0484532	-0.0987233	-0.110149	-0.0200667	-0.0206651	-0.154641	-0.0118453	-0.0197796	-0.0252337	-0.0558224	-0.0540119	-0.0304478	-0.0514628	-0.0500365	-0.0234027	-0.0423114	-0.0450787	-0.0173271	-0.0545444	-0.0506688	-0.0743368	-0.0336818	-0.044625
R	CGC	-0.0120525	-0.022395	-0.0145194	-0.00968778	-0.00686441	-0.0190348	-0.0838062	-0.0152933	-0.0300763	-0.0132672	-0.0290313	-0.0212677	-0.00963008	-0.0169249	-0.0205239	-0.00486126	-0.00750263	-0.0325484	-0.010236	-0.0188478	0.0100259	-0.0112364	0.0183056	0.00662894	-0.0263557	-0.0395517	-0.0388361	-0.0632386	-0.00890145	-0.0387944	-0.127393	-0.0230044	-0.00875369	0.0102729	-0.0306408	-0.0494726	-0.00777358	-0.0295685	-0.000568407	-0.019741	-0.0308213	-0.051564	-0.0522644	-0.0395164	-0.0222659	-0.0540036	-0.0492008	-0.0287697
R	CGT	-0.0298551	-0.0123143	-0.0101527	-0.02047	-0.0159545	-0.0277967	-0.0555711	-0.0133224	-0.033952	-0.029975	0.00475096	-0.00150404	-0.000141445	-0.00255381	-0.044728	-0.0106978	-0.0315366	-0.027261	-0.0251655	-0.0340901	-0.00858643	-0.0178014	0.00738482	-0.0300311	-0.0132339	0.0142283	-0.267168	-0.0857693	-0.00916784	-0.0323734	-0.200689	-0.0202513	-0.00465761	0.000592444	-0.0142236	-0.0159989	0.001586	0.00553509	-0.028278	-0.0408264	-0.00335041	-0.107637	-0.00505571	-0.0852052	0.00114198	-0.0310464	-0.071291	-0.0437811
R	CGA	-0.0348888	-0.0238669	-0.0438255	-0.0377212	-0.044911	-0.0623111	-0.157672	-0.044655	-0.00868841	-0.0696135	-0.0553182	-0.0643377	-0.0236039	-0.0429986	-0.0485435	-0.0250001	-0.0262818	-0.0678339	-0.062643	-0.07005	-0.00211355	0.0173453	-0.0652126	-0.0543654	-0.0382382	-0.0571318	-0.100683	-0.0804914	-0.022949	-0.0586143	-0.115317	-0.0339698	-0.0344065	-0.0370179	-0.171151	-0.104251	-0.0116049	-0.0405303	-0.135252	-0.0715872	-0.0342034	-0.124059	-0.0627388	-0.119652	-0.00947449	-0.201973	-0.119014	-0.0789228
R	CGG	-0.0130065	-0.0140293	-0.0129509	-0.0178565	-0.0219968	-0.0511139	-0.0714008	-0.0141642	-0.00654894	-0.0169813	-0.0168085	-0.0290072	-0.00682744	-0.000526347	-0.0315496	-0.0166113	-0.0169099	-0.00381209	0.000754239	-0.0318549	-0.0217404	-0.0146076	-0.0294004	-0.0345886	-0.014937	-0.0145526	-0.126319	-0.12999	-0.0140115	-0.00542663	-0.148114	-0.0302195	-0.0091386	-0.0228118	-0.0519016	-0.0304113	-0.00957272	-0.00935068	-0.0551392	-0.00886683	-0.0273981	-0.0767149	-0.0557492	-0.0405121	-0.0112166	-0.047451	-0.0891445	-0.0314849
S	TCC	-0.0224526	-0.0194235	-0.0109424	-0.0270893	-0.0180363	-0.0166429	-0.0519473	-0.00726306	-0.0203928	-0.0210532	-0.022339	-0.00250086	-0.0179293	-0.00400316	-0.0400107	-0.0232328	-0.0190975	-0.00784332	-0.0251052	-0.0292275	-0.022848	-0.0215816	-0.0405395	-0.0291438	-0.0115161	-0.0376823	-0.108317	-0.122777	-0.0156369	-0.0551608	-0.104499	-0.0222734	-0.0212109	-0.0190888	-0.0253356	-0.0211376	-0.0286337	-0.0213694	-0.0390321	-0.0360378	-0.0312694	-0.0585939	-0.0359417	-0.0467631	-0.0254895	-0.0551863	-0.0843238	-0.0556554
S	TCT	-0.0295457	-0.00686229	-0.0392094	-0.0216913	-0.0421194	-0.0532275	-0.00771717	-0.032776	-0.0250068	-0.019781	-0.0239915	-0.00701764	-0.0247089	-0.0102143	-0.0289769	-0.0206684	-0.0256695	-0.0256542	-0.0280556	-0.0332598	0.0211268	-0.0105696	-0.0342712	-0.0209552	-0.0120637	-0.0415253	-0.126859	-0.129561	-0.031556	-0.0360102	-0.15053	-0.0278973	-0.0344623	-0.00228332	-0.0684192	-0.035996	-0.0333035	-0.0322982	-0.0692456	-0.00969984	-0.0418052	-0.104042	-0.0706259	-0.0517095	-0.0244555	-0.0887698	-0.0184053	-0.0439485
S	TCA	-0.0267899	-0.0152533	-0.0152839	-0.0444737	-0.0303848	-0.0702783	-0.127203	-0.0297906	-0.0193474	-0.0574298	0.00245564	-0.0334674	-0.0252977	-0.0374431	-0.0270246	-0.0166337	-0.0333878	-0.0418839	-0.042217	-0.0832552	-0.0319087	-0.00238951	-0.0186068	-0.043675	-0.00400431	-0.0203367	-0.391273	-0.191752	-0.023434	-0.000649438	-0.16624	-0.0137195	0.00492121	-0.0281617	-0.0333063	-0.0456935	0.00171431	-0.0406569	-0.0916171	-0.0214287	-0.0306869	-0.0514608	-0.0415174	-0.0446898	-0.03754	-0.0823824	-0.0790988	-0.0810193
S	TCG	-0.0249791	-0.0340461	-0.0347066	-0.0319871	-0.0399683	-0.0286776	-0.105311	-0.0384977	-0.0268189	-0.0318356	-0.0474972	-0.0463478	-0.0237452	-0.0505003	-0.0472507	-0.0354753	-0.0389119	-0.034744	-0.030231	-0.0472707	-0.0223976	-0.0309012	-0.00869317	-0.0298012	-0.0364511	-0.0290949	-0.279237	-0.0937924	-0.0145071	-0.0640626	-0.159084	-0.0225128	-0.0118112	-0.0462242	-0.0725196	-0.0535291	-0.0159593	-0.0736885	-0.0579833	-0.0460288	-0.0290123	-0.13102	-0.0791645	-0.0388348	-0.0379956	-0.102736	-0.0594398	-0.0128725
F	TTC	-0.0508716	-0.0237702	-0.00916191	-0.0440814	-0.0400124	-0.0350144	-0.131506	-0.0696246	-0.0164724	-0.0262202	-0.0212648	-0.0204589	-0.0112922	0.00817179	-0.0691419	-0.0206599	-0.0165077	-0.0253447	-0.0916677	-0.0520369	-0.0115882	-0.0171054	-0.0171657	0.00326976	0.00637342	-0.00653392	-0.225014	-0.113817	-0.0273624	-0.0478483	-0.103856	-0.00809275	-0.00613577	-0.0327696	-0.0395581	-0.0710504	-0.0364983	-0.00883908	-0.0554385	-0.0293713	-0.0189504	-0.0350418	0.00450697	-0.0847987	-0.0487549	-0.0569814	-0.0733512	-0.0764647
F	TTT	-0.045137	-0.0353815	-0.0260067	-0.0245532	-0.0312169	0.0150146	-0.0472052	-0.0203911	-0.00622845	0.0197629	-0.0167812	-0.0436868	-0.0239185	0.00475487	-0.0509602	-0.0421666	-0.0314088	0.000843824	-0.0172908	-0.00662601	0.00102509	0.0156578	-0.00832792	0.0291621	-0.000800796	0.0160146	-0.196955	-0.129085	-0.0207917	-0.00130282	-0.0767867	-0.0188814	-0.0159484	0.00174682	-0.0229046	-0.0211439	-0.0222669	-0.0551879	-0.0260489	-6.15997e-05	-0.0654922	-0.0326139	-0.0228047	-0.0485833	-0.0409747	-0.0767402	-0.0831509	-0.0800887
L	TTA	-0.0250025	-0.0552357	-0.0602175	-0.0309697	-0.028283	-0.0163521	-0.0888701	-0.034234	0.0205471	-0.0305231	0.0131312	-0.0187438	-0.0127165	0.0107566	-0.0489713	0.000803254	-0.0233394	-0.00775103	-0.0130823	-0.0281339	-0.0443482	0.0177429	-0.0220195	-0.00106932	-0.0285482	-0.0343286	-0.311119	-0.0935587	-0.0357563	-0.00369234	-0.177212	-0.0415512	-0.0063536	-0.0273178	-0.0406184	-0.0374737	-0.0269463	0.0239868	-0.0915889	-0.0272722	-0.0188812	-0.0536417	-0.00414499	-0.0406256	-0.062745	-0.0511495	-0.128762	-0.0399683
L	TTG	-0.0371971	-0.0158571	-0.0244026	-0.0286817	-0.0125475	-0.0490788	-0.103788	-0.00808529	-0.0227508	0.0181433	-0.00290179	-0.0181527	-0.0310714	-0.0238232	-0.0466953	-0.0238854	-0.0379221	-0.00777119	-0.0141861	-0.0197787	-0.0124268	-0.0175386	-0.0935809	-0.0338078	0.000660076	0.0226416	-0.142338	-0.0771868	0.00355749	-0.0601833	-0.131743	-0.0235156	-0.036416	-0.0387698	-0.0496061	-0.0244367	-0.0031366	0.0128679	-0.0739729	-0.0280354	-0.0560839	-0.0879935	-0.0967305	-0.029772	0.00576633	-0.0473606	-0.102845	-0.0721917
Y	TAC	-0.0334261	-0.049818	-0.0207149	-0.0340904	-0.0275522	-0.0337843	-0.10955	-0.0126456	-0.0204358	-0.0239456	-0.0515278	-0.0304694	-0.026078	-0.0249678	-0.0538352	-0.010177	-0.00770576	-0.041387	-0.0286268	-0.0496159	-0.0270183	0.0394811	0.00180356	-0.0138758	-0.0165628	-0.00940139	-0.128018	-0.10446	-0.0394602	-0.00325357	-0.0523611	-0.0184353	-0.0205242	-0.0225159	-0.0574026	-0.0570933	-0.00721357	-0.0279229	-0.0731426	-0.0495321	-0.0264839	-0.0574431	-0.0363729	-0.0742796	-0.0234014	-0.0865704	-0.0821353	-0.0656324
Y	TAT	-0.0270812	-0.0148827	0.0186472	-0.0063939	-0.0420097	-0.0365898	-0.089254	-0.03837	-0.0187041	-0.0244501	-0.0193733	-0.00611493	-0.0241671	-0.00584206	-0.0625948	-0.0399747	-0.00974193	-0.00807811	-0.0324421	-0.0383424	0.0178403	0.0357236	-0.00910712	-0.0236647	-0.0171253	-0.00673909	-0.083124	-0.0866449	-0.0460916	0.0258851	-0.239797	-0.000587971	-0.0232748	-0.0292608	-0.0147478	-0.064976	-0.0174095	-0.036386	-0.0815944	-0.0520464	-0.0447117	-0.111793	-0.0610347	-0.0561722	-0.00586973	-0.096455	-0.122221	-0.0339663
*	TAA	N/A	N/A	N/A	N/A	N/A	N/A	N/A	N/A	N/A	N/A	N/A	N/A	N/A	N/A	N/A	N/A	N/A	N/A	N/A	N/A	N/A	N/A	N/A	N/A	N/A	N/A	N/A	N/A	N/A	N/A	N/A	N/A	N/A	N/A	N/A	N/A	N/A	N/A	N/A	N/A	N/A	N/A	N/A	N/A	N/A	N/A	N/A	N/A
*	TAG	N/A	N/A	N/A	N/A	N/A	N/A	N/A	N/A	N/A	N/A	N/A	N/A	N/A	N/A	N/A	N/A	N/A	N/A	N/A	N/A	N/A	N/A	N/A	N/A	N/A	N/A	N/A	N/A	N/A	N/A	N/A	N/A	N/A	N/A	N/A	N/A	N/A	N/A	N/A	N/A	N/A	N/A	N/A	N/A	N/A	N/A	N/A	N/A
C	TGC	-0.0286221	-0.0403062	-0.0116253	-0.0262959	-0.0248735	-0.0571296	-0.0603648	-0.0198756	-0.0136048	-0.0264002	-0.043967	-0.0364234	-0.0220108	-0.0178768	-0.0332063	-0.0127876	-0.0176896	0.00375127	-0.0343227	-0.0299288	-0.0160935	-0.0066001	-0.0409398	-0.0142785	-0.0236401	-0.0446888	-0.0801535	-0.0967273	-0.0144616	0.00619308	-0.0825479	-0.0188632	-0.0243332	-0.0295423	-0.0516822	-0.0402514	-0.00258506	-0.00174025	-0.0419525	-0.04599	-0.00995987	-0.0894953	-0.01841	-0.0457257	-0.00480159	-0.071767	-0.0652042	-0.0457432
C	TGT	-0.040133	-0.0427197	-0.00983547	0.000417166	-0.033172	-0.0229386	-0.0287898	-0.0242393	-0.0248453	-0.0125709	0.0431208	-0.0356902	-0.0169932	-0.036652	-0.039882	-0.00307638	-0.00102999	-0.0199996	-0.0637582	-0.0213183	-0.0185072	0.0351896	-0.0187291	-0.0289506	-0.00659259	-0.00642051	-0.132229	-0.0907194	-0.00805404	-0.0173632	-0.10861	-0.0363447	-0.0264335	0.00432604	-0.0422702	-0.0826301	0.042291	-0.0131656	-0.0576334	-0.0029733	-0.0298357	-0.073189	0.0214031	-0.0856666	-0.0189545	-0.0461974	-0.0783458	-0.0278335
*	TGA	N/A	N/A	N/A	N/A	N/A	N/A	N/A	N/A	N/A	N/A	N/A	N/A	N/A	N/A	N/A	N/A	N/A	N/A	N/A	N/A	N/A	N/A	N/A	N/A	N/A	N/A	N/A	N/A	N/A	N/A	N/A	N/A	N/A	N/A	N/A	N/A	N/A	N/A	N/A	N/A	N/A	N/A	N/A	N/A	N/A	N/A	N/A	N/A
W	TGG	-0.0347591	-0.0347943	-0.0188632	-0.0188827	-0.0321133	-0.0376964	-0.0712692	-0.0263939	-0.0281009	-0.0062524	-0.00628487	-0.0265853	-0.011333	-0.0201768	-0.0354295	-0.00373892	-0.0169723	-0.0180877	0.00862527	-0.00504143	0.00885855	-0.00511537	-0.0331258	-0.0201103	-0.00352844	-0.0486616	-0.154577	-0.165135	-0.0307667	-0.0227508	-0.119556	-0.00850373	-0.0142687	-0.00359267	0.00693864	-0.0161506	-0.0469247	-0.00492888	-0.0970149	-0.0404	-0.0427591	0.0122831	-0.0597164	-0.0353771	-0.0145455	-0.0623687	-0.060717	-0.0225372
T	ACC	-0.0184299	-0.0184762	-0.00980832	-0.017018	-0.0153023	-0.0457209	-0.0775497	-0.0253083	-0.00451079	-0.0125973	-0.000840754	-0.0260667	-0.0173518	-0.0211877	-0.0335928	-0.0244718	-0.0125114	-0.0299554	-0.0206449	-0.0214148	-0.0133559	0.0393635	-0.0250804	-0.0268799	-0.00620819	-0.0462796	-0.197249	-0.13382	-0.0268206	-0.027564	-0.156197	-0.0375205	-0.0357053	-0.0141172	-0.0490439	-0.0437407	-0.00658712	0.00949167	-0.0449216	-0.0375089	-0.00521931	-0.0449806	-0.010451	-0.0322188	-0.0250111	-0.0688399	-0.0718397	-0.0357058
T	ACT	-0.0287386	0.00199136	-0.0295285	-0.03032	-0.0399764	-0.0393405	-0.0683186	-0.0582252	-0.00850031	-0.0237978	-0.0304827	-0.0198878	-0.020434	0.011287	-0.0293221	-0.027479	-0.0448401	-0.0167962	-0.0456616	-0.0225982	-0.0105768	-0.00603016	-0.0201332	-0.0140332	-0.0098506	-0.0329085	-0.242093	-0.136065	-0.0203536	-0.051261	-0.240213	-0.029755	-0.0276509	-0.0117922	-0.070499	-0.0242853	0.000787881	-0.0429701	-0.0539116	-0.0337237	-0.0146735	-0.0671886	-0.0196971	-0.0674271	-0.0243408	-0.0651323	-0.0428612	-0.0680257
T	ACA	-0.0292817	-0.0219646	-0.0274969	-0.0286267	-0.0283074	-0.00123705	-0.0758629	-0.0249624	-0.0217671	-0.0177111	-0.024093	-0.0279921	-0.0251105	-0.0391003	-0.026816	-0.0236286	-0.0294567	-0.0197015	-0.0518021	-0.03758	-0.024343	-0.0102093	-0.0190124	-0.0297446	0.0015869	-0.00958935	-0.31251	-0.194963	-0.0498405	-0.0215747	-0.225907	-0.0352857	-0.0162696	-0.0120135	-0.0603091	-0.040079	-0.0281669	-0.000142086	-0.0240955	-0.0247529	-0.0290468	-0.0445863	-0.0184418	-0.0522229	-0.0233397	-0.0584069	-0.0884711	-0.0321087
T	ACG	-0.0301925	-0.0326179	-0.0229342	-0.0348846	-0.0312333	-0.0255464	-0.0474917	-0.00365031	-0.0182082	-0.0106474	-0.0216796	-0.0287703	-0.0215187	-0.0174268	-0.0163861	-0.0385236	-0.0288002	-0.040309	-0.0269314	-0.0360259	-0.0151734	-0.0324278	-0.0503151	-0.0108362	-0.0661158	-0.0449037	-0.22626	-0.219408	-0.0153947	-0.013062	-0.206073	-0.0337935	-0.0242627	-0.0200378	-0.0231783	-0.0394981	-0.0276568	0.0147837	-0.0614554	0.00611439	-0.00987515	-0.0374224	-0.0447298	-0.043655	0.000282805	-0.0617106	-0.0747703	-0.0227465
I	ATC	-0.0311606	-0.034284	0.000275474	-0.0215719	-0.0298335	-0.0583841	-0.116318	-0.0369978	-0.0195024	-0.0201238	0.0139177	-0.0247074	-0.00316502	-0.009568	-0.0169809	-0.0268979	-0.022712	-0.0170289	-0.0544899	-0.0485939	0.000804582	-0.0417646	-0.0340992	-0.0486435	-0.00972061	0.0168223	-0.239242	-0.0991011	0.00865312	-0.00604028	-0.142734	-0.0219522	-0.0158483	0.011598	-0.0314924	-0.0287786	-0.00830937	0.00841613	0.00120987	-0.0118729	-0.00127876	-0.0473481	-0.033494	-0.0969569	-0.0132984	-0.0573063	-0.124419	-0.0639082
I	ATT	-0.0264848	-0.0360835	-0.0161109	-0.029925	-0.0188201	-0.0169481	-0.125305	-0.0289976	-0.0413457	-0.0270824	0.0231535	-0.0301505	-0.00276308	-0.000490507	-0.0146434	-0.0113916	-0.0145306	0.00446962	-0.0139373	-0.0152493	0.0283768	-0.000872836	-0.0198735	0.00637147	0.0245417	0.0131795	-0.249504	-0.17308	-0.020662	0.00298521	-0.30893	-0.0189096	-0.0478124	0.0273161	-0.052138	-0.0624734	-0.00900698	-0.0137352	-0.0761569	-0.00717456	0.0102088	-0.0942802	-0.00076086	-0.0556536	0.00391382	-0.0504978	-0.0309236	-0.0415492
I	ATA	-0.0298485	-0.0547918	-0.0247222	-0.0158273	-0.0220184	-0.0478639	-0.103541	-0.0138424	-0.0278364	-0.0461139	-0.0256118	-0.00993845	-0.0337203	-0.0227799	-0.0235616	-0.0335119	0.00607413	-0.045961	-0.0619565	-0.045862	-0.0321416	-0.0126848	-0.0202999	-0.0317974	-0.0270094	-0.063175	-0.22311	-0.186622	-0.0343559	-0.0680482	-0.121969	-0.000555085	-0.0278368	-0.0492039	-0.0980169	-0.0518738	-0.0381751	-0.0152002	-0.040274	-0.0440817	-0.0463095	-0.127091	-0.0662576	-0.0350495	-0.0354569	-0.179858	-0.109942	-0.0709261
M	ATG	-0.0331421	-0.0339365	0.0181116	-0.0140881	-0.0196206	-0.0449913	-0.0679753	0.0280515	0.022075	0.0336731	0.0418974	0.0102115	0.00286657	0.0216734	-0.00701371	-9.40097e-05	-0.0183997	-0.0126703	0.0088128	-0.0196498	0.0252197	0.131694	0.0632137	0.0522414	-0.0327734	0.0423097	-0.179967	-0.110524	-0.0237739	-0.0107395	-0.164767	0.0160185	0.023501	0.019534	0.0262534	-0.0189994	0.0389904	0.0953121	0.0634253	0.0202198	0.0147261	0.0382666	0.240642	0.0232904	-0.00593098	-0.00537927	-0.0250194	-0.0443247
N	AAC	-0.0227694	-0.0155636	-0.00224212	-0.0324806	-0.0307731	-0.0855807	-0.100357	-0.0203234	-0.0415914	-0.033399	-0.0391884	-0.0212898	-0.0421323	-0.0370485	-0.0376864	-0.0394696	-0.022974	-0.02823	-0.0385102	-0.0242045	-0.0270517	-0.0541743	-0.0513878	-0.0443487	-0.0309547	-0.0545021	-0.167552	-0.118714	-0.0218998	0.00756013	-0.166854	-0.00613094	-0.0127501	-0.00356664	-0.0805725	-0.044534	-0.012676	-0.0361857	-0.0582367	-0.0284317	-0.0370528	-0.0550879	-0.0334417	-0.0445502	-0.0274668	-0.095216	-0.087992	-0.047339
N	AAT	-0.0393172	-0.0294061	-0.0385432	-0.0304662	-0.0218756	-0.0211281	-0.100315	-0.0236944	-0.042391	-0.0176773	-0.0345814	-0.0401622	-0.0273387	-0.0384458	-0.0477377	-0.0447281	-0.0454926	-0.0472626	-0.068633	-0.060784	-0.0832413	-0.043521	-0.0962706	-0.0543791	-0.0459774	-0.0520277	-0.127719	-0.116083	-0.0236393	-0.0225958	-0.104247	-0.031891	-0.0190167	-0.0212519	-0.0609227	-0.0207081	-0.00366091	-0.0208869	-0.0138086	-0.0376933	-0.0570074	-0.0972614	-0.0435073	-0.0499368	-0.0237994	-0.0969895	-0.072443	-0.0462375
K	AAA	-0.018972	-0.0359004	-0.0278529	-0.0171457	-0.0163217	-0.0139155	-0.0860475	-0.0144359	-0.0310631	-0.0397856	-0.0250677	-0.0194402	-0.0235599	-0.00661019	-0.028082	-0.0216477	-0.00405947	-0.0459755	0.00209331	-0.036118	0.000498969	0.0392778	-0.0291581	-0.0205167	0.0125576	-0.00424924	-0.226673	-0.178731	-0.0527004	-0.0226919	-0.108119	-0.0224081	-0.000447368	0.0113553	-0.0244419	-0.0127917	-0.00852956	0.0185847	-0.0625073	-0.0273317	-0.0557927	-0.0527232	-0.0383723	-0.020723	-0.0205273	-0.0262186	-0.0758725	-0.0605843
K	AAG	-0.0274267	-0.03643	-0.0136499	-0.0283409	-0.0291482	-0.0638784	-0.0666623	-0.0414517	-0.0462506	-0.0262534	-0.016215	-0.045389	-0.0239442	-0.0357124	-0.0625832	-0.0437143	-0.011482	-0.016631	-0.0312209	-0.0246996	-0.0170926	0.0323802	-0.0326783	-0.00275253	-0.0276277	-0.0206823	-0.103389	-0.0507559	-0.00254239	-0.0836994	-0.165707	-0.0291314	-0.014259	-0.00849287	-0.0160661	-0.0660163	-0.039584	-0.0454732	-0.0425087	0.00363961	-0.0231629	-0.0574328	-0.0273993	-0.0694232	-0.0339985	-0.0293056	-0.123827	-0.0446628
S	AGC	-0.0188686	-0.0283956	-0.00174188	-0.0227569	-0.0079301	-0.0273125	-0.0674297	-0.0165243	-0.0329645	-0.0619507	-0.00263938	-0.0373253	-0.0129484	0.00561467	-0.0427061	-0.0309744	-0.0198958	-0.0317319	-0.0129449	-0.0274522	-0.00884515	0.0164065	-0.0615342	-0.0445437	-0.0212658	-0.0408818	-0.1401	-0.126878	-0.0425039	-0.0170652	-0.211168	-0.0226029	-0.0061941	-0.0516077	-0.0277319	-0.0412444	-0.00552372	-0.0499551	-0.017863	-0.00775312	-0.0528255	-0.0544959	-0.0109638	-0.0462329	-0.0182467	-0.10615	-0.0801848	-0.035381
S	AGT	-0.0441879	-0.0237163	-0.031261	-0.0156971	-0.0451962	-0.0222184	-0.128745	-0.0629316	-0.0481207	-0.0335727	-0.0427951	-0.0318	-0.0222476	-0.0148394	-0.0276906	-0.0128556	-0.0312307	-0.0281463	-0.0308669	-0.0206711	-0.0338965	-0.0354758	0.0206578	5.05423e-05	-0.0303856	-0.0294847	-0.252789	-0.211854	-0.0283824	-0.0234594	-0.131174	-0.033505	-0.0277142	-0.00883255	-0.060753	-0.0208692	-0.0180622	0.00904567	-0.0385305	-0.00305602	-0.0658987	-0.0982732	0.00651938	-0.0395303	-0.0278004	-0.0714249	-0.0815532	-0.0483793
R	AGA	-0.0433722	-0.0369215	-0.039256	-0.0317871	-0.0205258	-0.036427	-0.0470991	-0.00901829	-0.0492862	-0.0311325	-0.0450106	-0.0228383	-0.0410292	-0.0217241	-0.0388688	-0.0319904	-0.0399382	-0.0384508	-0.0151363	-0.0315109	-0.0219212	-0.027286	-0.00963152	-0.0280735	-0.0263744	0.0382341	-0.163041	-0.149199	-0.0174498	-0.0221787	-0.179023	-0.0202946	-0.0146819	-0.0341988	-0.0453523	-0.0336695	-0.0190401	-0.0265397	0.0146304	-0.0241208	-0.0441742	-0.0843704	-0.0396392	-0.0686668	-0.0330572	-0.118078	-0.0523594	-0.0496963
R	AGG	-0.0250185	-0.040039	-0.00135492	-0.0316376	-0.031569	-0.0322989	-0.0919448	-0.037251	-0.0326579	-0.0179455	-0.00233121	-0.0226468	-0.00847447	-0.0077007	-0.029959	-0.0242697	-0.0301352	-0.000203034	-0.0246801	-0.0138515	-0.0165345	-0.0217015	-0.0527514	-0.014419	-0.00825241	-0.0106974	-0.157192	-0.112676	-0.0199436	-0.0350142	-0.0938517	-0.0203309	-0.0253078	-0.0234797	-0.0450526	-0.0482528	-0.0374227	0.011938	-0.000667317	-0.0232768	-0.0496038	-0.0298395	-0.0927897	-0.0159449	-0.0345421	-0.0466668	-0.0854242	-0.0107478
A	GCC	-0.0231791	-0.0272084	-0.0195242	-0.0291389	-0.0223321	-0.04279	-0.0657739	-0.0307561	-0.019105	-0.0387365	-0.0306257	-0.0203155	-0.0244755	-0.0230843	-0.0243074	-0.015077	-0.0235885	-0.0372173	-0.0185221	-0.030889	-0.0134179	-0.0199342	-0.0373477	-0.00669675	-0.011718	-0.0359402	-0.164092	-0.135822	-0.0240238	-0.0579724	-0.126167	-0.0229377	-0.0170597	-0.0257712	-0.05353	-0.028686	-0.0157036	-0.00648293	-0.0434581	-0.0118086	-0.0313947	-0.0389554	-0.0165947	-0.0409523	-0.0365652	-0.0635046	-0.044912	-0.0467588
A	GCT	-0.0165882	-0.0131878	-0.00535351	-0.0216139	-0.0275727	-0.0274346	-0.0855998	-0.00779457	-0.0218168	-0.0233622	-0.0125287	-0.0330165	-0.0198094	-0.019617	-0.0248717	-0.0213305	-0.0284369	-0.0394297	-0.0249431	-0.0197935	-0.00649658	-0.0439817	-0.0145595	-0.0377983	-0.0153801	-0.0343387	-0.103301	-0.130778	-0.0244487	-0.0193889	-0.187863	-0.0264989	-0.0245692	-0.0202684	-0.049929	-0.0431666	0.00232253	0.0126996	-0.011868	-0.0248812	-0.0376255	-0.072908	-0.0357755	-0.0358119	-0.00695876	-0.0829357	-0.0555514	-0.0705768
A	GCA	-0.0253779	-0.0276179	-0.0310719	-0.0141802	-0.0152699	-0.0431373	-0.0781693	-0.0392234	-0.0124645	-0.0636908	0.00566158	-0.019833	-0.0189327	-0.028531	-0.0214532	-0.0176085	-0.025891	-0.0172304	-0.0295859	-0.0425787	-0.0325095	-0.0199775	-0.0401166	-0.0211059	-0.0295737	-0.0247204	-0.281816	-0.137184	-0.0147426	-0.0151055	-0.162382	-0.0415694	-0.017498	-0.0357556	-0.0492492	-0.0222812	-0.0123309	0.00889763	-0.0152124	0.00111649	-0.0304228	-0.0372115	-0.0323299	-0.0429333	-0.037708	-0.0548189	-0.0669393	-0.0539265
A	GCG	-0.022137	-0.0207491	-0.0148222	-0.0224655	-0.0179935	-0.0388252	-0.0623944	-0.0228334	-0.0283347	-0.0211355	-0.0143635	-0.027683	-0.00616787	-0.0107156	-0.0109021	-0.0110122	-0.0160963	-0.00545633	-0.0331679	-0.0320791	-0.0189229	-0.00224917	-0.049316	-0.0229329	-0.0270874	0.00535374	-0.163288	-0.127256	-0.0324979	-0.0401593	-0.150851	-0.0301522	-0.0346467	-0.0165714	-0.044733	-0.0356558	-0.0157021	-0.029371	-0.0564867	-0.0261801	-0.0117477	-0.0577957	-0.0172057	-0.0230266	-0.0182784	-0.0732841	-0.0916693	-0.0590417
V	GTC	-0.0256819	-0.0320731	-0.0184439	-0.0216645	-0.0221362	-0.0433348	-0.070851	-0.0167104	-0.0149635	-0.0232033	-0.047897	-0.0113617	-0.0210123	-0.0110803	-0.0259783	-0.0080353	-0.0141675	-0.0340468	-0.0436647	-0.046149	-0.00809596	-0.0531875	-0.0168086	0.0063793	-0.00786993	-0.0618579	-0.214332	-0.114508	-0.0234982	-0.0370656	-0.136563	-0.0384936	-0.0108113	0.00281695	-0.071263	-0.0345045	0.0167565	-0.0163974	-0.0653181	-0.00169306	-0.0360469	-0.0821891	-0.0312059	-0.0415607	-0.0421287	-0.0481981	-0.0577299	-0.0513409
V	GTT	-0.0227652	-0.0139284	-0.0261963	-0.016531	-0.0099374	-0.0362121	-0.0448785	-0.0344182	-0.0258797	-0.0353802	-0.0339844	-0.0324358	-0.0088474	-0.0123659	-0.0189122	-0.00941355	-0.0312392	-0.0231443	-0.0389808	-0.0244992	-0.0199924	-0.00257258	-0.023269	-0.0147067	-0.00532785	0.00291891	-0.0507463	-0.147569	-0.013101	-0.0196607	-0.115756	-0.000572803	-0.0458684	-0.0124816	-0.0410328	-0.020598	-0.0287123	-0.0404274	-0.0290552	-0.0311097	-0.048984	-0.0899908	-0.0216112	-0.0335609	-0.0102964	-0.102623	-0.057154	-0.0431812
V	GTA	-0.0236944	-0.026825	-0.0169211	-0.0254657	-0.00193184	-0.0463224	-0.0558849	-0.00750493	-0.0188637	-0.0424573	-0.0378258	-0.0200544	-0.0124011	-0.0319644	-0.00309381	-0.0119384	0.0204687	-0.01622	-0.0499439	-0.0340721	0.00546085	0.0189742	0.010101	-0.00122216	-0.0110534	0.00814798	-0.270913	-0.201027	-0.0124525	0.00792397	-0.0986521	-0.00269297	-0.0114943	0.00571845	-0.0282281	-0.0449483	-0.0108192	-0.0151375	-0.0282553	-0.050102	-0.00412799	-0.0464593	-0.0144367	-0.0408621	-0.0194138	-0.0802822	-0.018821	-0.0535947
V	GTG	-0.0142265	-0.0110209	-0.0278402	-0.0108887	-0.0146381	-0.0465581	-0.0910801	-0.0216132	-0.0265996	-0.0371268	-0.0139985	-0.0292123	0.00127201	-0.00851521	-0.0119157	-0.0172913	-0.0239313	-0.0320318	-0.0289387	-0.00667766	-0.0152293	-0.0232271	-0.0254136	-0.00910796	-0.0299732	-0.027154	-0.100325	-0.0526623	-0.0210497	-0.0309765	-0.164937	-0.0191819	-0.0077235	0.0124199	-0.0390646	-0.0475096	-2.39214e-05	-0.0340443	-0.0220901	-0.0293611	-0.0419196	-0.0124725	0.10269	-0.0425628	-0.0338285	-0.102979	-0.0551523	-0.0320723
D	GAC	-0.0280573	-0.0240702	-0.0345644	-0.0228896	-0.0305822	-0.0465735	-0.0792081	-0.0312442	-0.0227327	-0.00328838	-0.031768	-0.0174001	-0.0227176	-0.0258101	-0.0240769	-0.0183721	-0.0285029	-0.0605833	-0.0568511	-0.0572327	-0.00929569	-0.042739	-0.0503358	-0.0481277	-0.0163338	-0.0607576	-0.171112	-0.108804	-0.0241356	-0.0431668	-0.0875686	-0.0401185	-0.0172943	0.00663615	-0.0291117	-0.0391732	-0.0157729	-0.0132833	-0.0423777	-0.0257514	-0.0263327	-0.0892643	-0.0359995	-0.0782272	-0.0297511	-0.0694615	-0.0710843	-0.0626143
D	GAT	-0.0221622	-0.0266847	-0.0359154	-0.0240535	-0.0430515	-0.0100232	-0.130425	-0.0508773	-0.0375683	-0.0516472	-0.0159828	-0.0136627	-0.00669044	-0.0115412	-0.0531101	-0.0390092	-0.000959478	-0.0236347	-0.0123984	-0.0669545	-0.0226217	-0.00237637	-0.0807461	-0.0446114	-0.0109589	-0.0028784	-0.245378	-0.168685	-0.0211533	-0.0320731	-0.14214	-0.0367729	-0.0182188	-0.0436052	-0.0385841	-0.0523552	-0.0356272	-0.0578473	-0.0799258	-0.0292261	-0.0660498	-0.0958199	-0.0751776	-0.0958342	-0.0201974	-0.110323	-0.0655151	-0.0717642
E	GAA	-0.0366491	-0.0410422	-0.0220743	-0.0225849	-0.0409811	-0.0299591	-0.120513	-0.017398	-0.0240292	-0.0220001	-0.0373703	-0.0479811	-0.00791398	-0.03487	-0.0633568	-0.0175032	-0.0233601	-0.0493185	0.00254024	-0.0423627	-0.0491607	-0.0532788	-0.0659965	-0.0236906	-0.0443512	-0.0330598	-0.142994	-0.189384	-0.0131316	-0.0456062	-0.196798	-0.0498849	-0.0180096	-0.0209457	-0.0552373	-0.0430311	-0.018413	-0.0536259	-0.0390137	-0.00531717	-0.0671876	-0.109429	-0.0256191	-0.0190441	-0.0348917	-0.0340704	-0.0969838	-0.0511233
E	GAG	-0.0139387	-0.0537257	-0.0176617	-0.010508	-0.0290509	-0.0269464	-0.0457178	-0.0386219	-0.0300523	-0.00718201	-0.0323253	-0.0486344	-0.0189122	-0.0259835	-0.0287171	-0.024632	-0.048256	-0.0468858	-0.0138614	-0.0723902	-0.0387781	-0.00660169	-0.0515474	-0.0259563	-0.0208371	-0.0632564	-0.065347	-0.0843483	-0.00568413	-0.0399015	-0.136199	-0.0209785	-0.0169591	-0.0189425	-0.0292709	-0.0497789	-0.0324324	-0.0875692	-0.0537447	-0.026232	-0.0149105	-0.0733722	-0.0199013	-0.02244	-0.0414063	-0.110587	-0.0403658	-0.0435841
G	GGC	-0.0186958	-0.0261059	-0.0168376	-0.0210407	-0.0261627	-0.0402215	-0.0762258	-0.027179	-0.029515	-0.0276153	-0.018106	-0.0149406	-0.00659445	-0.0289496	-0.035855	-0.0184939	-0.014914	-0.0238789	5.94932e-05	-0.0147207	-0.00242052	-0.0354914	-0.0381893	-0.0144135	-0.0221743	-0.00965346	-0.175891	-0.182248	-0.0115855	-0.0261376	-0.165439	-0.0271142	-0.0148324	-0.0156222	-0.0495478	-0.038373	-0.0173892	-0.0253253	-0.0362808	-0.0333694	-0.00404036	-0.0523011	-0.0113374	-0.0570702	-0.0136703	-0.0568646	-0.0580776	-0.0366848
G	GGT	-0.0260422	-0.0111874	-0.0285646	-0.0181461	-0.0212859	-0.0373934	-0.0731484	-0.0154897	-0.0201839	-0.0332216	-0.0393138	-0.0223005	-0.00108941	0.00426642	-0.041796	-0.0165056	-0.0472027	-0.0187124	-0.0393883	-0.0197827	0.00397668	-0.0348696	0.010922	-0.0317068	-0.0482192	-0.0282667	-0.279079	-0.201228	-0.0152905	-0.0488674	-0.165575	-0.0244585	-0.0107	-0.0371134	-0.0580745	-0.0469831	-0.0270861	-0.012253	-0.0207262	0.00416401	-0.0256554	-0.0555222	-0.082046	-0.056946	-0.0133162	-0.0600898	-0.0521518	-0.0523207
G	GGA	-0.0405036	-0.0273492	-0.0344324	-0.013481	-0.022751	-0.0511866	-0.0754683	-0.0382751	-0.0304262	-0.000785884	-0.0913152	-0.0143962	-0.0235431	-0.0457426	-0.046329	-0.0127852	-0.0231598	-0.0254588	-0.0239985	-0.05017	-0.000289711	0.000595295	-0.0108663	-0.0117797	-0.0086439	-0.0459125	-0.284699	-0.17858	-0.01319	-0.0464139	-0.199243	-0.0293873	-0.0327178	-0.0258058	-0.0551323	-0.0416509	-0.0436514	0.00173965	-0.0467158	-0.0325101	-0.0264687	-0.075697	-0.00434293	-0.0730092	-0.023828	-0.0825297	-0.0604398	-0.0305501
G	GGG	-0.0170248	-0.00150561	-0.0229245	-0.00774337	-0.0269857	-0.0328106	-0.0632874	-0.016204	-0.0126193	-0.0388485	-0.0299099	-0.0184607	-0.00882021	-0.0229125	-0.0106623	-0.0055242	-0.0117593	0.00251578	-0.00726473	-0.0158752	-0.0176686	-0.0319157	-0.0404368	-0.0144997	-0.0257921	-0.0635706	-0.106514	-0.163658	-0.0339131	-0.0264427	-0.0501269	-0.0201337	-0.0111782	-0.0160604	-0.00416829	-0.0348503	-0.0253718	-0.0174707	-0.0427527	-0.0261414	-0.0263793	-0.0388199	0.0172756	-0.0361436	-0.0369492	-0.0640408	-0.0279649	-0.0170487
[truncated: 214 more columns]

## Sheet: P-value for 2D codon heatmap
P-values for shuffled datasets exceeding experimental data of 2-dimensional representation of stalling propensities with the corresponding codons located in the P- and A-sites
P\A		Codons located in the A-site
		CCC	CCT	CCA	CCG	CTC	CTT	CTA	CTG	CAC	CAT	CAA	CAG	CGC	CGT	CGA	CGG	TCC	TCT	TCA	TCG	TTC	TTT	TTA	TTG	TAC	TAT	TAA	TAG	TGC	TGT	TGA	TGG	ACC	ACT	ACA	ACG	ATC	ATT	ATA	ATG	AAC	AAT	AAA	AAG	AGC	AGT	AGA	AGG
P	CCC	1	1	1	1	0.620896	0.99602	1	0.337313	0.748259	0.724378	0.551244	0.876617	0.627861	0.649751	0.935323	0.557214	0.490547	0.193035	0.19602	0.138308	0.0825871	0.00696517	0.678607	1	0.0706468	0.952239	1	1	0.960199	0.99403	1	0.78408	0.748259	0.757214	1	0.99403	0.295522	0.548259	0.914428	0.00597015	0.766169	1	0.328358	0.866667	0.791045	0.99602	0.99005	0.959204
P	CCT	1	1	1	0.99801	0.00895522	0.98209	0.99005	0.305473	0.642786	0.158209	0.0597015	0.915423	0.0039801	0.276617	0.953234	0.499502	0.823881	0.558209	0.113433	0.799005	0.737313	0.0905473	0.736318	0.151244	0.930348	0.950249	1	1	0.947264	0.935323	1	0.98209	0.675622	0.968159	0.928358	0.728358	0.763184	0.632836	0.78408	0.565174	0.939303	0.981095	0.909453	0.973134	0.974129	0.99801	0.931343	0.997015
P	CCA	1	1	1	1	0.0686567	0.900498	0.997015	0.434826	0.222886	0.5801	0.558209	0.824876	0.79602	0.725373	0.745274	0.859701	0.425871	0.231841	0.600995	0.530348	0.0278607	0.0716418	0.583085	0.284577	0.691542	0.927363	1	1	0.985075	0.999005	1	0.931343	0.99204	0.21791	0.99204	0.99005	0.0507463	0.937313	0.653731	0.240796	0.987065	1	0.728358	0.987065	0.842786	1	0.999005	0.997015
P	CCG	1	1	1	1	0.925373	1	1	0.360199	0.905473	0.970149	0.778109	0.842786	0.618905	0.381095	1	0.860697	0.699502	0.504478	0.443781	0.99602	0.103483	0.426866	0.754229	0.155224	0.162189	0.966169	1	1	0.79801	0.999005	1	0.995025	0.103483	0.345274	0.98408	0.945274	0.0865672	0.574129	0.942289	0.732338	0.931343	1	0.970149	1	0.389055	0.999005	0.948259	0.98806
L	CTC	0.1801	0.612935	0.362189	0.168159	0.0109453	0.624876	0.458706	0.0338308	0.171144	0.728358	0	0.917413	0.0169154	0.0965174	0.821891	0.0248756	0.0706468	0.362189	0.727363	0.793035	0.1801	0.239801	0.514428	0.502488	0.242786	0.700498	0.889552	0.951244	0.0945274	0.119403	0.999005	0.132338	0.00497512	0.038806	0.707463	0.754229	0.100498	0.327363	0.915423	0.655721	0.922388	0.993035	0.810945	0.6	0.514428	1	1	0.929353
L	CTT	0.644776	0.651741	0.175124	0.0109453	0.561194	0.490547	0.999005	0.760199	0.0218905	0.563184	0.431841	0.779104	0.343284	0.20796	0.927363	0.104478	0.214925	0.1801	0.765174	0.458706	0.812935	0.041791	0.293532	0.404975	0.152239	0.457711	0.999005	1	0.00298507	0.940299	0.965174	0.748259	0.4	0.543284	0.742289	0.818905	0.0955224	0.526368	0.176119	0.600995	0.867662	0.949254	0.233831	0.931343	0.897512	0.800995	1	0.897512
L	CTA	0.897512	0.503483	0.368159	0.20199	0.627861	0.829851	0.938308	0.374129	0.920398	0.835821	0.502488	0.0537313	0.686567	0.664677	0.844776	0.763184	0.773134	0.300498	0.525373	0.879602	0.690547	0.641791	0.383085	0.79403	0.645771	0.581095	0.924378	0.917413	0.197015	0.475622	0.929353	0.216915	0.0268657	0.133333	0.882587	0.233831	0.229851	0.950249	0.556219	0.156219	0.912438	0.985075	0.757214	0.677612	0.416915	0.906468	1	0.864677
L	CTG	0.331343	0.358209	0.491542	0	0.169154	0.852736	0.999005	0.00597015	0.317413	0.439801	0.183085	0.18209	0.0139303	0.356219	0.561194	0.307463	0.218905	0.269652	0.843781	0.585075	0.289552	0.0845771	0.787065	0.719403	0.889552	0.0895522	1	1	0.20398	0.889552	1	0.385075	0.0636816	0.294527	0.972139	0.98607	0.861692	0.20199	0.976119	0.241791	0.319403	0.983085	0.570149	0.99005	0.344279	0.869652	1	1
H	CAC	0.279602	0.132338	0	0.137313	0.105473	0.472637	0.878607	0.876617	0.124378	0.310448	0.0865672	0.0238806	0.0706468	0.0208955	0.59403	0.674627	0.0208955	0.115423	0.199005	0.6199	0.195025	0.458706	0.459701	0.678607	0.614925	0.457711	0.907463	0.749254	0.346269	0.725373	0.987065	0.0169154	0.126368	0.0527363	0.432836	0.907463	0.0865672	0.730348	0.81791	0.404975	0.0119403	0.855721	0.693532	0.524378	0.906468	0.880597	0.98607	0.671642
H	CAT	0.698507	0.61393	0.0527363	0.520398	0.200995	0.881592	0.837811	0.300498	0.233831	0.498507	0.645771	0.226866	0.658706	0.306468	0.863682	0.223881	0.311443	0.406965	0.757214	0.221891	0.529353	0.397015	0.826866	0.169154	0.829851	0.868657	0.999005	0.910448	0.61592	0.416915	0.997015	0.329353	0.490547	0.769154	0.300498	0.933333	0.337313	0.260697	0.918408	0.339303	0.263682	0.911443	0.493532	0.352239	0.243781	1	0.966169	0.58806
Q	CAA	0.289552	0.260697	0.58209	0.61194	0.079602	0.900498	0.955224	0.40995	0.178109	0.433831	0.765174	0.972139	0.19602	0.271642	0.328358	0.233831	0.0268657	0.59602	0.0706468	0.565174	0.00497512	0.124378	0.233831	0.771144	0.551244	0.58408	1	0.991045	0.0368159	0.0686567	1	0.671642	0.0527363	0.108458	0.851741	0.341294	0.0885572	0.221891	0.623881	0.173134	0.0537313	0.883582	0.172139	0.589055	0.742289	0.99801	0.229851	0.763184
Q	CAG	0.20199	0.884577	0.00497512	0.00497512	0.363184	0.743284	0.999005	0.535323	0.136318	0.78806	0.0378109	0.892537	0.00696517	0.497512	0.99005	0.127363	0.399005	0.693532	0.00597015	0.483582	0.711443	0.568159	0.493532	0.522388	0.551244	0.8	0.98607	0.999005	0.247761	0.325373	1	0.0766169	0.21194	0.41592	0.968159	0.968159	0.562189	0.842786	0.769154	0.374129	0.816915	0.773134	0.291542	0.899502	0.941294	0.981095	0.552239	0.830846
R	CGC	0	0.249751	0.0238806	0.00199005	0.000995025	0.21592	1	0.0845771	0.477612	0.109453	0.511443	0.142289	0	0.100498	0.189055	0	0.000995025	0.606965	0.0268657	0.119403	0	0.129353	0.000995025	0	0.389055	0.744279	0.624876	0.99602	0.00895522	0.775124	1	0.272637	0.00597015	0.000995025	0.563184	0.99403	0.039801	0.525373	0.0358209	0.153234	0.504478	0.921393	0.941294	0.713433	0.259701	0.975124	0.953234	0.447761
R	CGT	0.6199	0.0975124	0.0835821	0.179104	0.116418	0.516418	0.912438	0.0746269	0.629851	0.616915	0.0179104	0.0159204	0.00199005	0.00199005	0.910448	0.0169154	0.60995	0.60597	0.493532	0.692537	0.0636816	0.290547	0.0835821	0.604975	0.124378	0.0437811	1	0.999005	0.078607	0.558209	1	0.227861	0.0368159	0.0477612	0.176119	0.19005	0.0308458	0.0587065	0.492537	0.777114	0.0746269	1	0.0437811	0.993035	0.00696517	0.528358	0.981095	0.882587
R	CGA	0.79403	0.4199	0.910448	0.849751	0.929353	0.978109	1	0.887562	0.0527363	0.975124	0.942289	0.99403	0.300498	0.877612	0.880597	0.344279	0.400995	0.99403	0.977114	0.999005	0.0218905	0.00895522	0.859701	0.935323	0.734328	0.923383	0.99204	0.995025	0.351244	0.949254	1	0.612935	0.690547	0.757214	1	1	0.200995	0.702488	1	0.981095	0.668657	0.999005	0.953234	1	0.0845771	1	1	1
R	CGG	0.000995025	0.0328358	0.0368159	0.0358209	0.109453	0.976119	1	0.0587065	0.000995025	0.155224	0.18209	0.450746	0	0.00497512	0.532338	0.0268657	0.0597015	0.0119403	0.00199005	0.670647	0.21393	0.136318	0.438806	0.696517	0.128358	0.21393	1	1	0.0278607	0.0447761	1	0.634826	0.00298507	0.39602	0.983085	0.549254	0.0278607	0.0766169	0.898507	0.0925373	0.38408	0.997015	0.954229	0.81393	0.0278607	0.911443	1	0.471642
S	TCC	0.156219	0.19801	0.0199005	0.445771	0.081592	0.247761	0.905473	0.0268657	0.170149	0.303483	0.289552	0.00995025	0.0597015	0.00597015	0.859701	0.176119	0.121393	0.0487562	0.353234	0.487562	0.277612	0.345274	0.675622	0.455721	0.0865672	0.728358	0.997015	1	0.081592	0.960199	1	0.279602	0.19005	0.235821	0.38607	0.252736	0.465672	0.313433	0.651741	0.629851	0.58209	0.965174	0.646766	0.8199	0.328358	0.924378	0.999005	0.99005
S	TCT	0.58408	0.0835821	0.834826	0.240796	0.874627	0.952239	0.130348	0.649751	0.354229	0.358209	0.41194	0.0557214	0.422886	0.0597015	0.464677	0.249751	0.430846	0.425871	0.459701	0.622886	0.00597015	0.247761	0.634826	0.574129	0.20597	0.758209	0.971144	0.99801	0.635821	0.747264	1	0.579104	0.626866	0.081592	0.987065	0.674627	0.608955	0.538308	0.946269	0.20597	0.746269	0.995025	0.944279	0.870647	0.436816	1	0.381095	0.852736
S	TCA	0.573134	0.230846	0.163184	0.973134	0.610945	0.98806	1	0.576119	0.330348	0.928358	0.0756219	0.696517	0.452736	0.795025	0.487562	0.191045	0.578109	0.726368	0.642786	0.999005	0.510448	0.123383	0.305473	0.740299	0.106468	0.360199	1	1	0.346269	0.0835821	1	0.126368	0.0348259	0.537313	0.58209	0.932338	0.0736318	0.755224	0.98209	0.38806	0.503483	0.867662	0.648756	0.734328	0.673632	0.977114	0.974129	1
S	TCG	0.236816	0.628856	0.678607	0.60199	0.864677	0.548259	1	0.810945	0.416915	0.636816	0.932338	0.929353	0.146269	0.98806	0.872637	0.773134	0.865672	0.732338	0.549254	0.963184	0.264677	0.550249	0.144279	0.538308	0.655721	0.58607	1	1	0.0985075	0.9801	1	0.343284	0.0308458	0.873632	0.99602	0.965174	0.150249	0.987065	0.898507	0.81393	0.410945	1	0.989055	0.651741	0.723383	1	0.941294	0.134328
F	TTC	0.985075	0.368159	0.0945274	0.932338	0.795025	0.641791	0.999005	0.99403	0.0995025	0.504478	0.232836	0.21393	0.0149254	0.0179104	0.99005	0.223881	0.0975124	0.469652	1	0.968159	0.0746269	0.283582	0.367164	0.0457711	0.0895522	0.39801	1	1	0.347264	0.78806	0.985075	0.0378109	0.0079602	0.58209	0.705473	0.98806	0.561194	0.163184	0.691542	0.400995	0.293532	0.518408	0.109453	0.981095	0.845771	0.883582	0.946269	0.99801
F	TTT	0.921393	0.61791	0.306468	0.251741	0.484577	0.0487562	0.703483	0.335323	0.0766169	0.0228856	0.220896	0.690547	0.214925	0.0497512	0.806965	0.808955	0.491542	0.0646766	0.303483	0.0616915	0.0845771	0.0527363	0.253731	0.0139303	0.0955224	0.0447761	0.987065	0.99403	0.301493	0.111443	0.927363	0.270647	0.151244	0.0577114	0.360199	0.297512	0.301493	0.747264	0.442786	0.136318	0.900498	0.589055	0.340299	0.746269	0.675622	0.934328	0.913433	0.978109
L	TTA	0.356219	0.925373	0.898507	0.474627	0.521393	0.426866	0.934328	0.665672	0.0228856	0.703483	0.106468	0.375124	0.131343	0.0427861	0.750249	0.041791	0.457711	0.356219	0.312438	0.474627	0.719403	0.165174	0.552239	0.218905	0.58607	0.713433	1	0.983085	0.5801	0.274627	1	0.747264	0.0935323	0.59403	0.733333	0.651741	0.522388	0.19801	0.959204	0.59204	0.361194	0.899502	0.270647	0.719403	0.936318	0.863682	0.99403	0.720398
L	TTG	0.732338	0.115423	0.322388	0.450746	0.078607	0.795025	0.99403	0.120398	0.302488	0.0119403	0.133333	0.231841	0.491542	0.434826	0.672637	0.229851	0.749254	0.120398	0.199005	0.21393	0.242786	0.753234	0.99801	0.867662	0.0746269	0.0716418	0.99801	0.970149	0.0079602	0.993035	1	0.507463	0.634826	0.702488	0.761194	0.400995	0.0686567	0.0567164	0.919403	0.458706	0.877612	0.972139	0.955224	0.512438	0.0139303	0.735323	0.9801	0.9801
Y	TAC	0.58806	0.922388	0.353234	0.662687	0.431841	0.612935	1	0.143284	0.342289	0.39403	0.854726	0.524378	0.378109	0.443781	0.857711	0.0656716	0.080597	0.669652	0.412935	0.876617	0.492537	0.000995025	0.0696517	0.160199	0.317413	0.343284	0.99602	1	0.683582	0.0965174	0.741294	0.2199	0.243781	0.442786	0.901493	0.883582	0.108458	0.552239	0.882587	0.836816	0.41393	0.832836	0.460697	0.965174	0.243781	0.977114	0.9801	0.968159
Y	TAT	0.289552	0.193035	0.000995025	0.0577114	0.840796	0.722388	0.948259	0.721393	0.272637	0.391045	0.237811	0.181095	0.299502	0.242786	0.933333	0.764179	0.274627	0.279602	0.533333	0.711443	0.0298507	0.0616915	0.424876	0.540299	0.433831	0.428856	0.953234	0.974129	0.741294	0.0537313	1	0.0945274	0.313433	0.484577	0.232836	0.969154	0.271642	0.556219	0.873632	0.829851	0.700498	0.956219	0.862687	0.838806	0.18209	0.965174	0.999005	0.539303
*	TAA	N/A	N/A	N/A	N/A	N/A	N/A	N/A	N/A	N/A	N/A	N/A	N/A	N/A	N/A	N/A	N/A	N/A	N/A	N/A	N/A	N/A	N/A	N/A	N/A	N/A	N/A	N/A	N/A	N/A	N/A	N/A	N/A	N/A	N/A	N/A	N/A	N/A	N/A	N/A	N/A	N/A	N/A	N/A	N/A	N/A	N/A	N/A	N/A
*	TAG	N/A	N/A	N/A	N/A	N/A	N/A	N/A	N/A	N/A	N/A	N/A	N/A	N/A	N/A	N/A	N/A	N/A	N/A	N/A	N/A	N/A	N/A	N/A	N/A	N/A	N/A	N/A	N/A	N/A	N/A	N/A	N/A	N/A	N/A	N/A	N/A	N/A	N/A	N/A	N/A	N/A	N/A	N/A	N/A	N/A	N/A	N/A	N/A
C	TGC	0.446766	0.835821	0.0517413	0.289552	0.317413	0.936318	0.965174	0.139303	0.0965174	0.566169	0.79801	0.708458	0.155224	0.242786	0.60398	0.0238806	0.123383	0.00995025	0.628856	0.523383	0.204975	0.127363	0.664677	0.260697	0.370149	0.762189	0.960199	0.99602	0.132338	0.0378109	0.995025	0.214925	0.256716	0.58209	0.891542	0.759204	0.0567164	0.130348	0.760199	0.81194	0.0746269	0.98806	0.363184	0.867662	0.0338308	0.98806	0.975124	0.848756
C	TGT	0.81393	0.837811	0.0945274	0.0039801	0.640796	0.471642	0.546269	0.41592	0.372139	0.252736	0.0039801	0.553234	0.159204	0.696517	0.711443	0.0218905	0.0288557	0.436816	0.977114	0.426866	0.312438	0.0437811	0.503483	0.694527	0.218905	0.359204	1	0.98806	0.0716418	0.397015	0.999005	0.626866	0.441791	0.144279	0.789055	0.99801	0.00199005	0.322388	0.766169	0.119403	0.556219	0.972139	0.0278607	0.981095	0.379104	0.79602	0.975124	0.532338
*	TGA	N/A	N/A	N/A	N/A	N/A	N/A	N/A	N/A	N/A	N/A	N/A	N/A	N/A	N/A	N/A	N/A	N/A	N/A	N/A	N/A	N/A	N/A	N/A	N/A	N/A	N/A	N/A	N/A	N/A	N/A	N/A	N/A	N/A	N/A	N/A	N/A	N/A	N/A	N/A	N/A	N/A	N/A	N/A	N/A	N/A	N/A	N/A	N/A
W	TGG	0.688557	0.653731	0.189055	0.0885572	0.564179	0.774129	0.974129	0.504478	0.480597	0.139303	0.0527363	0.410945	0.0139303	0.257711	0.512438	0	0.113433	0.230846	0.0368159	0.0169154	0.00298507	0.125373	0.641791	0.328358	0.119403	0.911443	1	1	0.536318	0.354229	1	0.0646766	0.112438	0.081592	0.0258706	0.145274	0.878607	0.135323	0.99801	0.716418	0.799005	0.081592	0.944279	0.652736	0.0995025	0.959204	0.964179	0.359204
T	ACC	0.0447761	0.141294	0.0597015	0.0477612	0.0547264	0.917413	0.999005	0.351244	0.00199005	0.212935	0.0338308	0.40199	0.0547264	0.314428	0.655721	0.279602	0.0308458	0.563184	0.258706	0.19801	0.109453	0	0.465672	0.313433	0.0686567	0.800995	1	1	0.321393	0.507463	1	0.781095	0.7801	0.162189	0.918408	0.908458	0.0298507	0.0875622	0.751244	0.702488	0.0626866	0.747264	0.206965	0.612935	0.363184	0.993035	0.997015	0.669652
T	ACT	0.471642	0.0238806	0.560199	0.577114	0.831841	0.706468	0.967164	0.974129	0.101493	0.529353	0.60796	0.431841	0.20199	0.0119403	0.542289	0.545274	0.864677	0.39801	0.810945	0.296517	0.111443	0.185075	0.460697	0.336318	0.20796	0.624876	1	1	0.262687	0.859701	1	0.538308	0.497512	0.21194	0.971144	0.439801	0.136318	0.816915	0.859701	0.568159	0.254726	0.908458	0.474627	0.931343	0.309453	0.906468	0.741294	0.98607
T	ACA	0.546269	0.40199	0.559204	0.521393	0.520398	0.0597015	0.9801	0.438806	0.326368	0.363184	0.600995	0.547264	0.38209	0.79602	0.485572	0.367164	0.522388	0.433831	0.916418	0.777114	0.371144	0.248756	0.429851	0.511443	0.150249	0.383085	1	1	0.946269	0.393035	1	0.671642	0.292537	0.286567	0.98209	0.841791	0.433831	0.21393	0.543284	0.510448	0.538308	0.877612	0.453731	0.864677	0.339303	0.917413	0.993035	0.604975
T	ACG	0.459701	0.715423	0.272637	0.721393	0.58607	0.476617	0.847761	0.0169154	0.171144	0.0716418	0.348259	0.448756	0.118408	0.20597	0.185075	0.859701	0.3801	0.818905	0.427861	0.696517	0.189055	0.472637	0.808955	0.105473	0.976119	0.677612	1	1	0.110448	0.225871	1	0.649751	0.251741	0.316418	0.39403	0.859701	0.433831	0.0427861	0.907463	0.0328358	0.125373	0.679602	0.79005	0.799005	0.0179104	0.968159	0.973134	0.335323
I	ATC	0.60995	0.635821	0.0189055	0.231841	0.572139	0.918408	0.995025	0.680597	0.248756	0.355224	0.041791	0.375124	0.00199005	0.0995025	0.255721	0.458706	0.220896	0.206965	0.840796	0.842786	0.0427861	0.666667	0.547264	0.79403	0.175124	0.129353	1	0.99005	0.0119403	0.0955224	1	0.275622	0.154229	0.0129353	0.659701	0.525373	0.115423	0.132338	0.252736	0.200995	0.0835821	0.80199	0.676617	0.989055	0.202985	0.907463	0.99801	0.959204
I	ATT	0.3801	0.700498	0.281592	0.564179	0.276617	0.459701	0.997015	0.502488	0.778109	0.61194	0.0726368	0.579104	0.0119403	0.163184	0.20199	0.150249	0.150249	0.118408	0.356219	0.267662	0.0258706	0.381095	0.443781	0.200995	0.0447761	0.155224	1	1	0.350249	0.193035	1	0.414925	0.848756	0.0218905	0.888557	0.914428	0.238806	0.355224	0.947264	0.389055	0.0706468	0.98806	0.238806	0.855721	0.0666667	0.852736	0.649751	0.716418
I	ATA	0.514428	0.914428	0.542289	0.200995	0.436816	0.756219	0.987065	0.316418	0.60199	0.882587	0.618905	0.166169	0.650746	0.492537	0.424876	0.646766	0.0447761	0.800995	0.950249	0.781095	0.641791	0.408955	0.478607	0.58607	0.552239	0.940299	1	1	0.627861	0.916418	0.973134	0.113433	0.551244	0.840796	1	0.850746	0.639801	0.479602	0.685572	0.814925	0.857711	0.999005	0.99204	0.634826	0.643781	1	0.99204	0.972139
M	ATG	0.602985	0.561194	0.0079602	0.0865672	0.170149	0.745274	0.913433	0.0079602	0.000995025	0.00497512	0.000995025	0.0119403	0.00696517	0.00199005	0.0756219	0.00199005	0.249751	0.176119	0.0517413	0.267662	0	0	0.00497512	0.000995025	0.597015	0.00298507	1	0.997015	0.321393	0.261692	1	0.0149254	0	0.0427861	0.00696517	0.318408	0.00298507	0.00597015	0.0079602	0.0537313	0.0338308	0.0199005	0	0.00597015	0.0477612	0.296517	0.436816	0.768159
N	AAC	0.193035	0.165174	0.0159204	0.58806	0.575124	0.999005	0.99403	0.321393	0.850746	0.560199	0.706468	0.329353	0.857711	0.669652	0.650746	0.721393	0.233831	0.468657	0.699502	0.301493	0.438806	0.896517	0.800995	0.775124	0.568159	0.860697	1	0.99801	0.277612	0.0208955	1	0.0776119	0.126368	0.0825871	0.999005	0.78607	0.18806	0.626866	0.844776	0.41592	0.716418	0.879602	0.740299	0.779104	0.418905	0.99801	0.993035	0.793035
N	AAT	0.754229	0.440796	0.667662	0.548259	0.326368	0.397015	0.98607	0.38607	0.832836	0.38607	0.6199	0.775124	0.461692	0.667662	0.767164	0.871642	0.81393	0.728358	0.926368	0.929353	0.961194	0.667662	0.955224	0.79204	0.755224	0.834826	0.99602	0.99602	0.357214	0.416915	0.993035	0.541294	0.242786	0.40398	0.893532	0.400995	0.195025	0.395025	0.356219	0.712438	0.845771	0.997015	0.797015	0.80995	0.389055	0.983085	0.944279	0.81194
K	AAA	0.161194	0.640796	0.500498	0.0865672	0.168159	0.237811	0.995025	0.263682	0.59204	0.760199	0.542289	0.238806	0.257711	0.148259	0.469652	0.249751	0.078607	0.677612	0.0905473	0.700498	0.0825871	0.0268657	0.702488	0.41791	0.0656716	0.253731	1	1	0.816915	0.410945	1	0.448756	0.111443	0.0338308	0.641791	0.174129	0.237811	0.078607	0.943284	0.473632	0.955224	0.950249	0.81791	0.460697	0.381095	0.575124	0.975124	0.957214
K	AAG	0.418905	0.700498	0.147264	0.365174	0.423881	0.935323	0.948259	0.776119	0.857711	0.483582	0.200995	0.838806	0.248756	0.595025	0.939303	0.79005	0.0636816	0.361194	0.480597	0.257711	0.254726	0.039801	0.507463	0.149254	0.532338	0.461692	0.978109	0.816915	0.0348259	0.975124	1	0.439801	0.105473	0.152239	0.276617	0.965174	0.636816	0.719403	0.752239	0.162189	0.400995	0.916418	0.507463	0.935323	0.556219	0.513433	0.999005	0.640796
S	AGC	0.0845771	0.381095	0.0179104	0.314428	0.0328358	0.491542	0.973134	0.221891	0.565174	0.979104	0.0825871	0.691542	0.0447761	0.0079602	0.824876	0.545274	0.18607	0.633831	0.0965174	0.460697	0.0676617	0.00995025	0.916418	0.785075	0.372139	0.719403	1	1	0.834826	0.175124	1	0.290547	0.0248756	0.881592	0.39403	0.845771	0.0577114	0.834826	0.346269	0.0776119	0.896517	0.872637	0.206965	0.824876	0.247761	0.997015	0.997015	0.560199
S	AGT	0.930348	0.461692	0.543284	0.106468	0.859701	0.456716	1	0.973134	0.884577	0.648756	0.729353	0.60796	0.216915	0.304478	0.446766	0.134328	0.519403	0.492537	0.574129	0.358209	0.668657	0.697512	0.0616915	0.162189	0.538308	0.668657	1	1	0.485572	0.484577	0.999005	0.645771	0.472637	0.218905	0.897512	0.321393	0.372139	0.0955224	0.699502	0.167164	0.936318	0.99602	0.162189	0.735323	0.498507	0.957214	0.964179	0.843781
R	AGA	0.909453	0.677612	0.762189	0.653731	0.20995	0.724378	0.802985	0.181095	0.940299	0.644776	0.804975	0.465672	0.800995	0.38408	0.706468	0.554229	0.693532	0.744279	0.296517	0.59403	0.318408	0.530348	0.357214	0.560199	0.574129	0.039801	1	1	0.354229	0.421891	1	0.316418	0.167164	0.641791	0.883582	0.646766	0.333333	0.560199	0.120398	0.505473	0.836816	0.993035	0.81194	0.947264	0.622886	0.99801	0.908458	0.869652
R	AGG	0.265672	0.831841	0.0208955	0.639801	0.599005	0.614925	0.997015	0.78209	0.612935	0.358209	0.122388	0.38607	0.0109453	0.0606965	0.572139	0.200995	0.463682	0.0547264	0.354229	0.100498	0.18607	0.376119	0.79204	0.19403	0.128358	0.264677	1	1	0.235821	0.644776	0.99602	0.274627	0.362189	0.514428	0.789055	0.899502	0.707463	0.0616915	0.114428	0.461692	0.877612	0.632836	0.99204	0.347264	0.616915	0.703483	0.989055	0.0985075
A	GCC	0.168159	0.531343	0.106468	0.654726	0.148259	0.894527	0.999005	0.595025	0.081592	0.836816	0.544279	0.135323	0.21791	0.251741	0.234826	0.00895522	0.232836	0.850746	0.142289	0.561194	0.0557214	0.264677	0.647761	0.0268657	0.0447761	0.678607	1	1	0.289552	0.995025	1	0.18607	0.041791	0.337313	0.98607	0.454726	0.0835821	0.0288557	0.81393	0.0557214	0.551244	0.745274	0.132338	0.840796	0.843781	0.99801	0.874627	0.967164
A	GCT	0.038806	0.130348	0.0298507	0.267662	0.412935	0.512438	0.99403	0.0328358	0.304478	0.430846	0.146269	0.718408	0.158209	0.232836	0.467662	0.238806	0.470647	0.835821	0.416915	0.305473	0.0736318	0.828856	0.165174	0.687562	0.178109	0.635821	0.98209	1	0.334328	0.348259	1	0.476617	0.378109	0.258706	0.911443	0.865672	0.0437811	0.0268657	0.242786	0.38607	0.707463	0.979104	0.657711	0.688557	0.0577114	0.997015	0.902488	1
A	GCA	0.302488	0.572139	0.553234	0.0487562	0.0985075	0.80398	0.989055	0.78806	0.078607	0.989055	0.0268657	0.278607	0.153234	0.567164	0.351244	0.119403	0.331343	0.314428	0.559204	0.865672	0.608955	0.436816	0.670647	0.354229	0.534328	0.492537	1	1	0.110448	0.273632	1	0.839801	0.134328	0.639801	0.909453	0.292537	0.156219	0.0875622	0.450746	0.0646766	0.550249	0.699502	0.610945	0.764179	0.787065	0.940299	0.965174	0.952239
A	GCG	0.119403	0.19204	0.0567164	0.156219	0.0547264	0.837811	0.981095	0.257711	0.505473	0.252736	0.154229	0.540299	0	0.0258706	0.0378109	0.00895522	0.0199005	0.0189055	0.59602	0.696517	0.167164	0.0248756	0.833831	0.402985	0.38806	0.0179104	1	1	0.587065	0.81194	1	0.636816	0.80398	0.20597	0.892537	0.720398	0.0626866	0.497512	0.938308	0.495522	0.0676617	0.923383	0.19204	0.303483	0.0935323	0.99602	1	0.995025
V	GTC	0.262687	0.645771	0.140299	0.185075	0.183085	0.808955	0.999005	0.1801	0.0706468	0.322388	0.852736	0.0606965	0.146269	0.0517413	0.38806	0.0149254	0.0338308	0.608955	0.829851	0.924378	0.0328358	0.887562	0.254726	0.00895522	0.0825871	0.961194	1	1	0.247761	0.713433	1	0.714428	0.0338308	0.0228856	0.997015	0.692537	0.00298507	0.259701	0.931343	0.041791	0.737313	0.947264	0.462687	0.731343	0.831841	0.862687	0.928358	0.936318
V	GTT	0.148259	0.185075	0.432836	0.165174	0.0756219	0.558209	0.768159	0.709453	0.460697	0.661692	0.622886	0.626866	0.038806	0.170149	0.315423	0.0597015	0.606965	0.426866	0.6199	0.420896	0.369154	0.300498	0.510448	0.40995	0.105473	0.306468	0.753234	1	0.136318	0.427861	0.987065	0.0487562	0.858706	0.225871	0.718408	0.367164	0.513433	0.745274	0.589055	0.574129	0.829851	0.979104	0.475622	0.59204	0.177114	0.99801	0.902488	0.853731
V	GTA	0.315423	0.451741	0.257711	0.449751	0.039801	0.799005	0.919403	0.120398	0.254726	0.783085	0.675622	0.267662	0.0945274	0.644776	0.0995025	0.125373	0.00298507	0.370149	0.851741	0.589055	0.0577114	0.0616915	0.20398	0.229851	0.228856	0.2	1	1	0.19005	0.0885572	0.974129	0.0666667	0.189055	0.0716418	0.509453	0.785075	0.251741	0.320398	0.523383	0.744279	0.109453	0.713433	0.432836	0.701493	0.368159	0.963184	0.399005	0.893532
V	GTG	0.0109453	0.0766169	0.445771	0.0189055	0.081592	0.858706	1	0.331343	0.38607	0.699502	0.163184	0.517413	0	0.0835821	0.0766169	0.148259	0.337313	0.562189	0.484577	0.0487562	0.172139	0.448756	0.480597	0.193035	0.436816	0.3801	0.985075	0.895522	0.20398	0.608955	1	0.273632	0.0378109	0.00497512	0.743284	0.909453	0.0457711	0.525373	0.391045	0.427861	0.763184	0.132338	0	0.795025	0.662687	0.99602	0.891542	0.647761
D	GAC	0.460697	0.406965	0.655721	0.305473	0.528358	0.787065	0.995025	0.436816	0.316418	0.0985075	0.481592	0.133333	0.257711	0.423881	0.302488	0.0945274	0.485572	0.976119	0.931343	0.995025	0.0636816	0.699502	0.771144	0.841791	0.200995	0.898507	1	1	0.336318	0.772139	0.99801	0.691542	0.166169	0.0159204	0.524378	0.735323	0.153234	0.308458	0.686567	0.355224	0.472637	0.99403	0.561194	0.985075	0.475622	0.953234	0.985075	0.983085
D	GAT	0.168159	0.406965	0.741294	0.370149	0.833831	0.295522	0.999005	0.919403	0.710448	0.824876	0.323383	0.167164	0.00895522	0.2	0.877612	0.793035	0.0149254	0.480597	0.243781	0.987065	0.332338	0.224876	0.907463	0.833831	0.282587	0.230846	1	1	0.341294	0.547264	1	0.692537	0.166169	0.739303	0.681592	0.938308	0.651741	0.894527	0.953234	0.564179	0.965174	0.983085	0.952239	0.974129	0.304478	1	0.876617	0.979104
E	GAA	0.756219	0.785075	0.361194	0.237811	0.708458	0.532338	0.999005	0.293532	0.40597	0.372139	0.783085	0.869652	0.0149254	0.58806	0.959204	0.252736	0.4199	0.806965	0.0935323	0.79204	0.872637	0.821891	0.866667	0.454726	0.752239	0.698507	1	1	0.152239	0.715423	1	0.837811	0.21194	0.440796	0.862687	0.730348	0.280597	0.843781	0.681592	0.168159	0.969154	0.99403	0.567164	0.315423	0.641791	0.546269	0.99602	0.880597
E	GAG	0.0119403	0.959204	0.191045	0.0278607	0.3801	0.406965	0.694527	0.714428	0.554229	0.122388	0.627861	0.901493	0.130348	0.444776	0.404975	0.353234	0.923383	0.812935	0.158209	0.995025	0.684577	0.197015	0.693532	0.453731	0.265672	0.902488	0.885572	0.98209	0.0487562	0.762189	1	0.282587	0.171144	0.320398	0.439801	0.902488	0.541294	0.99801	0.832836	0.430846	0.140299	0.960199	0.40597	0.376119	0.740299	1	0.701493	0.824876
G	GGC	0.0298507	0.41393	0.0686567	0.112438	0.38607	0.852736	1	0.431841	0.589055	0.513433	0.202985	0.0527363	0	0.449751	0.702488	0.0686567	0.0109453	0.306468	0.00597015	0.0577114	0.00298507	0.639801	0.60597	0.0895522	0.280597	0.078607	1	1	0.0308458	0.408955	1	0.362189	0.0517413	0.161194	0.975124	0.81393	0.136318	0.420896	0.61791	0.687562	0.00497512	0.920398	0.0875622	0.975124	0.0537313	0.9801	0.989055	0.734328
G	GGT	0.345274	0.0776119	0.543284	0.0975124	0.249751	0.744279	0.99602	0.135323	0.210945	0.575124	0.78408	0.309453	0.00199005	0.0129353	0.827861	0.0825871	0.949254	0.276617	0.759204	0.19204	0.0109453	0.664677	0.120398	0.702488	0.822886	0.506468	1	1	0.145274	0.890547	1	0.507463	0.039801	0.707463	0.933333	0.920398	0.450746	0.225871	0.408955	0.100498	0.410945	0.888557	0.98209	0.948259	0.145274	0.947264	0.866667	0.957214
G	GGA	0.935323	0.389055	0.667662	0.0606965	0.328358	0.939303	0.975124	0.818905	0.519403	0.0905473	0.997015	0.172139	0.249751	0.908458	0.846766	0.0696517	0.304478	0.426866	0.383085	0.948259	0.0348259	0.128358	0.234826	0.20995	0.220896	0.816915	1	1	0.122388	0.868657	1	0.604975	0.629851	0.525373	0.914428	0.7801	0.779104	0.137313	0.808955	0.591045	0.502488	0.98607	0.210945	0.98607	0.41194	0.99005	0.920398	0.58607
G	GGG	0.0139303	0.000995025	0.19403	0.000995025	0.502488	0.650746	0.995025	0.104478	0.00995025	0.844776	0.487562	0.19801	0.00199005	0.372139	0.0258706	0.000995025	0.0149254	0.00597015	0.0537313	0.0696517	0.142289	0.572139	0.741294	0.218905	0.429851	0.973134	1	1	0.660697	0.527363	0.864677	0.262687	0.0129353	0.164179	0.00696517	0.689552	0.341294	0.264677	0.770149	0.425871	0.359204	0.775124	0.00298507	0.678607	0.785075	0.989055	0.475622	0.153234
[truncated: 214 more columns]

## Sheet: Aminoacid heatmap
Stop efficiency at the corresponging amino acid residue in the -2nd position while mRNA codon with specified index number is located in the P-site												Stop efficiency at the corresponging amino acid residue in the E-site while mRNA codon with specified index number is located in the P-site												Stop efficiency at the corresponging amino acid residue in the P-site while mRNA codon with specified index number is located in the P-site												Stop efficiency at the corresponging amino acid residue in the A-site while mRNA codon with specified index number is located in the P-site												Stop efficiency at the corresponging amino acid residue in the 2nd position while mRNA codon with specified index number is located in the P-site
-2	Index number of mRNA codon located in the P-site											E	Index number of mRNA codon located in the P-site											P	Index number of mRNA codon located in the P-site											A	Index number of mRNA codon located in the P-site											2	Index number of mRNA codon located in the P-site
	4	5	6	7	8	9	10	11	12	13			3	4	5	6	7	8	9	10	11	12			2	3	4	5	6	7	8	9	10	11			1	2	3	4	5	6	7	8	9	10			1
W	-0.0366476	-0.0381014	-0.0269771	-0.0103795	-0.0211437	-0.0188667	-0.022277	-0.0319811	-0.0139334	-0.0120212		W	-0.0184125	-0.0507084	-0.0438416	-0.017327	-0.00608264	-0.0177729	-0.0209747	-0.0139725	-0.0269201	-0.00783208		W	0.00339868	-0.0190586	-0.0419968	-0.0437239	-0.0192291	-0.00531418	-0.0256166	-0.01428	-0.0165406	-0.0349205		W	0.336666	-0.00303718	-0.0276818	-0.0444113	-0.0442313	-0.0278447	-0.0193146	-0.0246105	-0.0220227	-0.0258522		W	0.365621
Y	-0.0486788	-0.0445129	-0.0343539	-0.0160298	-0.0257397	-0.0232001	-0.0235009	-0.0306122	-0.0126129	-0.00846133		Y	-0.0248653	-0.0472766	-0.042166	-0.0279841	-0.0215337	-0.0244837	-0.0241359	-0.0178113	-0.0281949	-0.0164781		Y	0.00149444	-0.034607	-0.0478096	-0.0514537	-0.0294775	-0.0207555	-0.0275492	-0.0235502	-0.0124407	-0.0472937		Y	0.469593	0.014497	-0.0239659	-0.0506626	-0.0491497	-0.0270214	-0.0234467	-0.0379719	-0.0225294	-0.02259		Y	0.499854
F	-0.0530558	-0.0537786	-0.0362818	-0.028294	-0.0251613	-0.0284149	-0.0295985	-0.0525653	-0.0125449	-0.00963788		F	-0.0252191	-0.0517015	-0.0499034	-0.0282177	-0.0268075	-0.022563	-0.0185995	-0.0245423	-0.0362808	-0.0071277		F	-0.0061563	-0.0227213	-0.0526552	-0.042313	-0.0360557	-0.0124268	-0.0279311	-0.0235038	-0.0335642	-0.033261		F	0.403586	0.0267325	-0.0247394	-0.0312995	-0.0251269	-0.0133215	0.00270574	-0.0173094	-0.0175742	-0.019012		F	0.402203
I	-0.0551579	-0.0526426	-0.0365036	-0.02215	-0.0298253	-0.0241577	-0.0209589	-0.0409754	-0.00960504	-0.00958602		I	-0.0377637	-0.0590198	-0.0527641	-0.0338599	-0.0180407	-0.025993	-0.0239101	-0.022957	-0.0330358	-0.00907995		I	-0.0214091	-0.0359134	-0.055255	-0.0522222	-0.0298101	-0.0171673	-0.0276751	-0.0208101	-0.020193	-0.0366645		I	0.536225	0.00474147	-0.0307388	-0.050661	-0.0418934	-0.0302781	-0.00352911	-0.0252544	-0.0150543	-0.0207892		I	0.54154
L	-0.0473228	-0.0386463	-0.0305567	-0.0119734	-0.0267491	-0.022747	-0.0248444	-0.0324201	-0.0136246	-0.0115727		L	-0.0239438	-0.0441193	-0.0408114	-0.0285747	-0.0131983	-0.0272746	-0.0233445	-0.0221523	-0.0327556	-0.0113835		L	-0.0123317	-0.02377	-0.0515652	-0.0424746	-0.0283875	-0.0166843	-0.0267351	-0.020917	-0.0226113	-0.0426232		L	0.384654	-0.00949935	-0.0349331	-0.054767	-0.0509953	-0.0368433	-0.0213732	-0.0286835	-0.0253334	-0.0284663		L	0.388514
V	-0.0532754	-0.0408136	-0.0351339	-0.0172381	-0.028094	-0.0267817	-0.0272624	-0.0303449	-0.0162253	-0.00557024		V	-0.0360886	-0.0482415	-0.0444508	-0.0313398	-0.0180798	-0.0294553	-0.0209194	-0.0211714	-0.0370565	-0.0138945		V	-0.00328855	-0.0228033	-0.0440354	-0.0407051	-0.0276833	-0.00416305	-0.0240386	-0.0166666	-0.0210413	-0.0277588		V	0.455273	0.033426	-0.0119023	-0.0327314	-0.027481	-0.0177523	-0.00203034	-0.0191513	-0.0155571	-0.0164934		V	0.381472
M	-0.0572187	-0.0467087	-0.0371516	-0.0257106	-0.0297749	-0.0183972	-0.0252064	-0.0166583	-0.0117734	-0.0221873		M	-0.0114702	-0.0515249	-0.0523626	-0.024876	-0.0071583	-0.0258572	-0.0229799	-0.0186074	-0.0304764	-0.0151586		M	0.181836	-0.0161079	-0.0379243	-0.0384626	-0.000669171	0.0149762	-0.00879294	-0.0162651	-0.0100436	-0.0291439		M	0.335145	-0.0147384	-0.0209128	-0.0409576	-0.0398162	-0.0267423	0.00117901	-0.0261088	-0.0174964	-0.021684		M	0.475925
A	-0.0494985	-0.0391162	-0.0316339	-0.0111343	-0.0264283	-0.0237887	-0.0232469	-0.0331291	-0.0132391	-0.00792902		A	-0.0302027	-0.0491837	-0.0485483	-0.0336253	-0.0133665	-0.0307621	-0.0264499	-0.0264487	-0.032753	-0.0128538		A	-0.0147117	-0.0287496	-0.044296	-0.038066	-0.0300857	-0.00859769	-0.0249286	-0.0210071	-0.0213169	-0.0244043		A	0.398473	0.0110422	-0.0256371	-0.0410168	-0.0349684	-0.0245374	-0.0093274	-0.0234891	-0.0200465	-0.0179941		A	0.38248
T	-0.0544098	-0.0483478	-0.0320759	-0.0280921	-0.0288506	-0.0235236	-0.0262969	-0.0372698	-0.00952381	-0.00603381		T	-0.0312924	-0.054977	-0.0429931	-0.027554	-0.0172961	-0.0253044	-0.0224507	-0.0218422	-0.0316451	-0.0146944		T	5.02506e-05	-0.0329096	-0.0529123	-0.0458759	-0.0359411	-0.0149348	-0.0250024	-0.0204038	-0.0240087	-0.0289274		T	0.490227	0.001244	-0.0333334	-0.052202	-0.0486224	-0.0370626	-0.0180397	-0.0318565	-0.0257797	-0.0205542		T	0.505014
S	-0.0500542	-0.039099	-0.0318666	-0.0151149	-0.0259641	-0.021278	-0.022207	-0.035593	-0.0105598	-0.00756144		S	-0.0305141	-0.0469412	-0.0446787	-0.0303359	-0.0154914	-0.0267015	-0.0246714	-0.027065	-0.0294793	-0.0126692		S	-0.0297213	-0.0315222	-0.0528429	-0.0464402	-0.0300777	-0.0112606	-0.0235818	-0.0236967	-0.0227798	-0.0323786		S	0.426581	-0.00902445	-0.038905	-0.050104	-0.0476706	-0.0348539	-0.0101541	-0.0284477	-0.0210466	-0.0248569		S	0.412662
G	-0.0340657	-0.037555	-0.0233132	-0.0111097	-0.0250326	-0.0193378	-0.0211644	-0.0296352	-0.0060768	-0.00497283		G	-0.0205123	-0.0462633	-0.0357243	-0.0282347	-0.00933961	-0.0271297	-0.0248951	-0.0217116	-0.0233445	-0.00240417		G	-0.00356944	-0.0266549	-0.0414016	-0.0400817	-0.0247385	-0.0100103	-0.02459	-0.023289	-0.0191407	-0.0250408		G	0.330919	0.0115438	-0.0187673	-0.0352041	-0.027485	-0.0187781	-0.0105288	-0.0217909	-0.01979	-0.0206613		G	0.36601
P	-0.0456078	-0.0332832	-0.0226656	-0.00664776	-0.0233179	-0.0219343	-0.0244005	-0.0314755	-0.0130155	-0.00881712		P	-0.0324576	-0.0492633	-0.0439687	-0.0379403	-0.0254372	-0.0349139	-0.0349457	-0.0348095	-0.0414946	-0.0145064		P	-0.0170078	-0.034159	-0.0652276	-0.0552845	-0.0410239	-0.0390788	-0.0477918	-0.0446771	-0.0440854	-0.0480038		P	0.339393	0.000490757	-0.0244758	-0.0478835	-0.0423987	-0.0323525	-0.0256616	-0.0354912	-0.0349643	-0.0343237		P	0.303827
Q	-0.0615696	-0.0500011	-0.0272172	-0.0139265	-0.0262435	-0.0265032	-0.0297689	-0.0370525	-0.00778526	-0.0143264		Q	-0.0329808	-0.0563783	-0.0468999	-0.0301324	-0.0174217	-0.0272276	-0.0161746	-0.0170614	-0.0320163	-0.0110128		Q	-0.0167949	-0.0347882	-0.0468146	-0.0406451	-0.0302952	-0.0176644	-0.0222868	-0.0201798	-0.017485	-0.0288782		Q	0.502732	-0.00231918	-0.0270162	-0.0466544	-0.0406349	-0.0316838	-0.0118421	-0.0253743	-0.0189352	-0.0195199		Q	0.51232
N	-0.0513217	-0.0470809	-0.0347694	-0.0222346	-0.0323901	-0.0285247	-0.0164862	-0.0395406	-0.0135882	-0.010778		N	-0.0321441	-0.046372	-0.0447794	-0.027852	-0.0187765	-0.0275969	-0.021863	-0.0157958	-0.0246167	-0.0132437		N	-0.0306426	-0.0421785	-0.0579632	-0.0526107	-0.0383134	-0.0152189	-0.0242778	-0.0189557	-0.0255459	-0.0339517		N	0.51661	-0.0242862	-0.0483686	-0.0810762	-0.063391	-0.0436969	-0.0250901	-0.035385	-0.0276602	-0.0398111		N	0.549954
H	-0.0480572	-0.0478802	-0.0409843	-0.0145076	-0.0330878	-0.0268314	-0.0293383	-0.0446062	-0.0168049	-0.00966658		H	-0.0279923	-0.0486179	-0.0416824	-0.0312137	-0.0174225	-0.0272501	-0.0214468	-0.0242527	-0.0319998	-0.0143967		H	0.00611241	-0.0291768	-0.0424802	-0.0373925	-0.0318801	-0.0157644	-0.0256691	-0.0223851	-0.0167875	-0.0358665		H	0.479861	0.00159801	-0.0286699	-0.0457968	-0.0390066	-0.030828	-0.0133026	-0.0248247	-0.0231885	-0.0207321		H	0.479845
C	-0.0491125	-0.0459418	-0.0231441	-0.0156196	-0.0303013	-0.0236942	-0.0246673	-0.0341879	-0.00866248	-0.00736307		C	-0.0277207	-0.0459692	-0.0394944	-0.025541	-0.00770999	-0.0234049	-0.0191873	-0.0219275	-0.027935	-0.0108839		C	0.0055247	-0.019778	-0.0449297	-0.0413979	-0.0227856	-0.0138866	-0.0264615	-0.0165235	-0.0214758	-0.0363615		C	0.417222	-0.000692093	-0.0237484	-0.0449325	-0.0398227	-0.0287578	-0.0131726	-0.0297772	-0.0265601	-0.0276643		C	0.400166
K	-0.0550039	-0.059691	-0.0337156	-0.0221904	-0.0285045	-0.0300756	-0.0253469	-0.0361561	-0.00568857	-0.0122972		K	-0.0427731	-0.059416	-0.0530705	-0.0321109	-0.0166263	-0.0296384	-0.0152707	-0.024227	-0.0281549	-0.0100659		K	-0.00745273	-0.0385423	-0.0559488	-0.0482836	-0.0378721	-0.0168913	-0.0259291	-0.0193645	-0.0185832	-0.0285223		K	0.552516	0.00110513	-0.0412399	-0.0799433	-0.063908	-0.0449159	-0.0287625	-0.0306227	-0.0276184	-0.0414707		K	0.555875
R	-0.0445581	-0.0445486	-0.0309313	-0.015955	-0.032042	-0.0281658	-0.0241806	-0.0330814	-0.0143587	-0.00809506		R	-0.026676	-0.0445374	-0.0352246	-0.0288101	-0.00640705	-0.0228091	-0.0192797	-0.0202728	-0.04601	-0.0166827		R	0.0195882	-0.0279134	-0.0457335	-0.0403847	-0.0306515	-0.0115353	-0.0268339	-0.0202228	-0.0238883	-0.0388375		R	0.40298	-0.00683136	-0.0276289	-0.0463938	-0.0426503	-0.0306068	-0.0134526	-0.0261031	-0.0243374	-0.0218055		R	0.406589
E	-0.0492675	-0.0490588	-0.0300128	-0.0154751	-0.0241071	-0.0243139	-0.0238584	-0.0312885	-0.00906929	-0.00827113		E	-0.0383665	-0.0540184	-0.0481619	-0.029221	-0.0176601	-0.0258729	-0.0212274	-0.0211857	-0.0276357	-0.00194858		E	-0.055674	-0.0484437	-0.0524201	-0.0462242	-0.0376336	-0.00400409	-0.021201	-0.0214907	-0.0141023	-0.0180135		E	0.48297	-0.0139021	-0.045014	-0.0625405	-0.0569092	-0.0263955	-0.00617912	-0.0301602	-0.0263878	-0.0277756		E	0.475369
D	-0.0554458	-0.0521633	-0.0318946	-0.0282965	-0.0255409	-0.0246982	-0.020669	-0.0205148	-0.00909917	-0.00506648		D	-0.0471415	-0.0607281	-0.0545682	-0.040988	-0.0221741	-0.0310558	-0.0257883	-0.0236668	-0.0232478	-0.0137538		D	-0.0402431	-0.0413783	-0.0542013	-0.0499017	-0.0326177	-0.0105993	-0.0235151	-0.020402	-0.0167296	-0.0308146		D	0.481099	-0.0114658	-0.0367997	-0.0513761	-0.0482937	-0.0359592	-0.027591	-0.0292007	-0.0224592	-0.0247558		D	0.470723
*	0	0	0	0	0	0	0	0	0	0		*	0	0	0	0	0	0	0	0	0	0		*	0	0	0	0	0	0	0	0	0	0		*	0.010793	-0.297238	-0.123397	-0.184282	-0.157464	-0.118294	-0.0651286	-0.0652101	-0.0710775	-0.0690196		*	0.447429
[truncated: 8 more columns]

## Sheet: P-value for aminoacid heatmap
P-value for shuffled datasets exceeding experimental data of stop efficiency at the corresponging amino acid residue in the -2nd position while mRNA codon with specified index number is located in the P-site												P-value for shuffled datasets exceeding experimental data of stop efficiency at the corresponging amino acid residue in the E-site while mRNA codon with specified index number is located in the P-site												P-value for shuffled datasets exceeding experimental data of stop efficiency at the corresponging amino acid residue in the P-site while mRNA codon with specified index number is located in the P-site												P-value for shuffled datasets exceeding experimental data of stop efficiency at the corresponging amino acid residue in the A-site while mRNA codon with specified index number is located in the P-site												P-value for shuffled datasets exceeding experimental data of stop efficiency at the corresponging amino acid residue in the 2nd position while mRNA codon with specified index number is located in the P-site
-2	Index number of mRNA codon located in the P-site											E	Index number of mRNA codon located in the P-site											P	Index number of mRNA codon located in the P-site											A	Index number of mRNA codon located in the P-site											2	Index number of mRNA codon located in the P-site
	4	5	6	7	8	9	10	11	12	13			3	4	5	6	7	8	9	10	11	12			2	3	4	5	6	7	8	9	10	11			1	2	3	4	5	6	7	8	9	10			1
W	0.985104	0.337637	0.28004	0.225422	0.0695134	0.0734856	0.3714	0.386296	0.666336	0.892751		W	0.0019861	0.747766	0.606753	0.00695134	0.0953327	0.000993049	0.183714	0.0019861	0.0804369	0.148957		W	0.0655412	0.00496524	0.0506455	0.588878	0.0218471	0.0546177	0.306852	0.000993049	0.0268123	0.581927		W	1	0.320755	0.268123	0.129096	0.513406	0.248262	0.707051	0.148957	0.242304	0.599801		W	0.998014
Y	0.392254	0.995035	0.89573	0.57001	0.514399	0.594836	0.505462	0.309831	0.587885	0.535253		Y	0.0933466	0.893744	0.578947	0.352532	0.848064	0.273088	0.569017	0.0675273	0.150943	0.875869		Y	0.120159	0.992056	0.431976	0.948361	0.406157	0.785501	0.489573	0.446872	0.000993049	1		Y	0	0.000993049	0.0665343	0.561072	0.808342	0.209533	0.846077	0.993049	0.263158	0.285998		Y	0
F	1	1	0.972195	0.995035	0.435948	0.968222	0.91857	1	0.564052	0.737835		F	1	0.948361	0.991063	0.353525	0.991063	0.155909	0.0556107	0.549156	0.720953	0.0754717		F	0.868918	0.0734856	0.902681	0.42999	0.887786	0.332671	0.529295	0.40715	0.999007	0.457795		F	0.182721	0	0.0804369	0	0	0	0.00397219	0.000993049	0.00695134	0.0387289		F	0.541212
I	0.937438	1	0.968222	0.957299	0.902681	0.721946	0.22145	0.974181	0.271102	0.667329		I	0.995035	0.999007	0.997021	0.90566	0.7428	0.441907	0.563059	0.3714	0.443893	0.243297		I	0.998014	0.965243	0.960278	1	0.42999	0.640516	0.555114	0.111221	0.113208	0.730884		I	0	0.0248262	0.600794	0.603774	0.285998	0.385303	0.0119166	0.191658	0.000993049	0.129096		I	0
L	1	0.174777	0.685204	0.17577	0.560079	0.358491	0.747766	0.381331	0.870904	0.995035		L	0.930487	0.0754717	0.247269	0.237339	0.261172	0.561072	0.364449	0.130089	0.39424	0.396226		L	0.982125	0.0019861	0.846077	0.347567	0.176763	0.691162	0.291956	0.00695134	0.146971	1		L	0.999007	0.795432	0.989076	0.979146	0.999007	0.985104	0.967229	0.657398	0.702085	0.989076		L	0.989076
V	0.871897	0.665343	0.984111	0.805362	0.752731	0.948361	0.930487	0.129096	0.976167	0.0655412		V	0.992056	0.540218	0.818272	0.683217	0.777557	0.869911	0.0466733	0.105263	0.921549	0.830189		V	0.168818	0.000993049	0.0317776	0.188679	0.159881	0.00297915	0.0258193	0	0.061569	0.00893744		V	0	0	0	0	0	0	0.000993049	0	0	0		V	1
M	0.863952	0.82721	0.942403	0.921549	0.810328	0.146971	0.61569	0.0129096	0.479643	0.996028		M	0	0.7428	0.983118	0.23138	0.16286	0.423039	0.462761	0.187686	0.314796	0.703078		M	0	0.00695134	0.0536246	0.268123	0	0	0	0.0575968	0.0109235	0.246276		M	1	0.753724	0.0307845	0.100298	0.2572	0.277061	0.0307845	0.364449	0.0645482	0.285998		M	0
A	0.374379	0.0436941	0.769613	0.08143	0.374379	0.566038	0.358491	0.586892	0.848064	0.40715		A	0.484608	0.671301	1	0.939424	0.228401	0.994042	0.984111	0.957299	0.303873	0.736842		A	0.995035	0.243297	0.00496524	0.000993049	0.328699	0.00297915	0.00794439	0.00397219	0.00595829	0		A	0.820258	0	0.0019861	0	0	0	0.00297915	0	0	0		A	1
T	0.957299	0.996028	0.839126	1	0.902681	0.496524	0.979146	0.953327	0.156902	0.116187		T	0.673287	0.99007	0.650447	0.195631	0.775571	0.128103	0.278054	0.138034	0.246276	0.884806		T	0.0387289	0.91857	0.942403	0.857994	0.980139	0.464747	0.0446872	0.0139027	0.422046	0.0347567		T	0	0.0278054	0.898709	0.774578	0.957299	0.97716	0.807349	0.981132	0.747766	0.0287984		T	0
S	0.529295	0.17577	0.838133	0.594836	0.360477	0.061569	0.191658	0.893744	0.24429	0.322741		S	0.49851	0.400199	0.885799	0.575968	0.610725	0.350546	0.700099	0.944389	0.0158888	0.696127		S	1	0.880834	0.956306	0.949355	0.374379	0.0635551	0.0019861	0.315789	0.17279	0.187686		S	0	0.702085	1	0.494538	0.956306	0.930487	0.0148957	0.586892	0.000993049	0.494538		S	0.0476663
G	0	0.0367428	0	0.0744786	0.0983118	0	0.0427011	0.0387289	0	0.00297915		G	0	0.196624	0	0.223436	0.0188679	0.41708	0.752731	0.0754717	0	0		G	0.118173	0.060576	0	0.041708	0.00397219	0.0168818	0.0109235	0.209533	0	0		G	1	0	0	0	0	0	0.0367428	0	0.000993049	0.00595829		G	1
P	0.0019861	0	0	0	0	0.0496524	0.676266	0.181728	0.843098	0.741807		P	0.940417	0.590864	0.731877	1	1	1	1	1	1	0.974181		P	1	0.999007	1	1	1	1	1	1	1	1		P	1	0	0	0.10427	0.125124	0.699106	1	1	1	1		P	1
Q	0.997021	0.992056	0.314796	0.456802	0.358491	0.90864	0.984111	0.900695	0.12711	0.992056		Q	0.752731	0.995035	0.912612	0.504469	0.703078	0.502483	0	0.0109235	0.364449	0.359484		Q	0.947368	0.951341	0.282026	0.266137	0.440914	0.703078	0.0158888	0.0595829	0.0228401	0.0516385		Q	0	0.195631	0.143992	0.184707	0.14995	0.502483	0.207547	0.126117	0.0188679	0.0476663		Q	0
N	0.61569	0.965243	0.932473	0.9285	0.984111	0.967229	0.0258193	0.886792	0.659384	0.758689		N	0.670308	0.521351	0.817279	0.352532	0.752731	0.620655	0.262165	0.041708	0.0297915	0.624628		N	1	1	0.994042	0.988083	0.924528	0.513406	0.125124	0.0893744	0.617676	0.497517		N	0	1	1	1	1	0.98709	0.943396	0.958292	0.807349	0.998014		N	0
H	0.299901	0.985104	0.998014	0.479643	0.996028	0.968222	0.978153	1	0.969215	0.734856		H	0.258193	0.694141	0.401192	0.626614	0.714995	0.578947	0.121152	0.558093	0.386296	0.805362		H	0.00794439	0.470705	0.0258193	0.0357498	0.590864	0.567031	0.200596	0.205561	0.0019861	0.731877		H	0	0.0397219	0.277061	0.110228	0.0675273	0.418073	0.28004	0.0665343	0.272095	0.0526316		H	0
C	1	0.919563	0.0566038	0.57994	0.961271	0.572989	0.604767	0.610725	0.165839	0.400199		C	0.857994	0.301887	0.274081	0.122145	0.0714995	0.0844091	0.0268123	0.22145	0.0575968	0.372393		C	0.0148957	0.00297915	0.155909	0.318769	0.0327706	0.400199	0.32572	0.000993049	0.156902	0.759682		C	0.0705065	0.157895	0.0228401	0.0983118	0.124131	0.273088	0.323734	0.738828	0.76862	0.825223		C	0.622642
K	0.868918	1	0.869911	0.879841	0.679245	0.968222	0.761668	0.729891	0.129096	0.812314		K	1	0.999007	0.998014	0.669315	0.581927	0.781529	0.00297915	0.504469	0.184707	0.383317		K	0.544191	0.998014	0.952334	0.849057	0.911619	0.620655	0.286991	0.0973188	0.106256	0.204568		K	0	0.0993049	0.997021	1	1	0.985104	0.972195	0.752731	0.766634	0.999007		K	0
R	0	0.892751	0.752731	0.724926	1	1	0.633565	0.531281	0.96425	0.471698		R	0.00297915	0.0109235	0	0.247269	0	0	0	0.00397219	1	1		R	0	0.106256	0.020854	0.0387289	0.457795	0.0456802	0.210526	0	0.300894	0.998014		R	0.51142	0.489573	0.0357498	0.020854	0.190665	0.328699	0.17577	0.0387289	0.412115	0.0109235		R	0.263158
E	0.404171	0.995035	0.573982	0.563059	0.226415	0.65144	0.530288	0.391261	0.277061	0.499503		E	0.967229	0.976167	0.917577	0.401192	0.676266	0.341609	0.157895	0.236346	0.108242	0.00595829		E	1	1	0.807349	0.741807	0.916584	0.0178749	0.0139027	0.19861	0.0019861	0		E	0	0.886792	1	0.997021	0.998014	0.128103	0.0695134	0.724926	0.694141	0.788481		E	0
D	0.89573	1	0.757696	1	0.331678	0.707051	0.163853	0	0.217478	0.124131		D	1	1	1	0.996028	0.919563	0.94141	0.757696	0.419067	0.00397219	0.692155		D	1	0.998014	0.903674	0.948361	0.633565	0.182721	0.0347567	0.0863952	0.00695134	0.157895		D	0	0.798411	0.975174	0.63853	0.840119	0.855015	0.99007	0.650447	0.224429	0.503476		D	0
*	0	0	0	0.000993049	0	0	0	0	0.0019861	0.00297915		*	0	0	0	0	0	0	0	0	0	0.0019861		*	0.120159	0	0	0	0	0.00397219	0	0	0	0		*	1	1	1	1	1	1	1	1	1	1		*	0
[truncated: 8 more columns]

## Sheet: Heatmap for aminoacids in sites
Stop efficiency at the corresponging amino acid residue while located in the ribosome sites							P-values for shuffled datasets exceeding experimental data of stop efficiency at the corresponging triplet while located in the ribosome sites
	Ribosome sites							Ribosome sites
	-2	E	P	A	2			-2	E	P	A	2
W	-0.0238575	-0.0228176	-0.0214357	0.01743	0.027164		W	0.316418	0	0	0.99801	0.385075
Y	-0.0285637	-0.029502	-0.0304808	0.0275377	0.0746803		Y	0.931343	0.522388	0.863682	0	0
F	-0.0338179	-0.0295056	-0.0286842	0.047908	0.0319433		F	1	1	0.879602	0	0.0109453
I	-0.0332316	-0.0333089	-0.0318604	0.0797366	0.0540209		I	1	1	1	0	0
L	-0.0262134	-0.0266479	-0.0287057	0.0137305	0.023652		L	0.993035	0.0965174	0.757214	1	0.167164
V	-0.0284847	-0.0308797	-0.0236546	0.0389361	0.0330714		V	0.99403	0.967164	0	0	0.0208955
M	-0.0312381	-0.027182	0.00751752	0.0206902	0.0434386		M	0.981095	0.139303	0	0.862687	0
A	-0.025893	-0.0305489	-0.0256055	0.0203281	0.0201081		A	0.19602	0.999005	0	0	0.0109453
T	-0.0296318	-0.0286479	-0.027956	0.021915	0.0250251		T	1	0.703483	0.387065	0	0
S	-0.0262068	-0.0288607	-0.0306732	0.0207104	0.0168624		S	0.351244	0.681592	0.999005	0.0268657	0.00199005
G	-0.0215456	-0.0242876	-0.0237588	0.0240017	0.0243043		G	0	0	0	0.166169	0.0348259
P	-0.0235361	-0.0351855	-0.0432897	0.00773925	0.0087424		P	0	1	1	1	1
Q	-0.0302987	-0.0298489	-0.0282649	0.0202188	0.0480983		Q	0.99801	0.641791	0.282587	0	0
N	-0.0316229	-0.0300319	-0.0364999	0.0202266	0.0706088		N	0.999005	0.421891	1	0.716418	0
H	-0.0316321	-0.0291629	-0.0258937	0.0194579	0.0388328		H	1	0.614925	0.000995025	0	0
C	-0.02645	-0.0249044	-0.023724	0.027054	0.0147495		C	0.999005	0.00298507	0	0.0129353	0.60995
K	-0.0357848	-0.0357171	-0.0314902	0.0494955	0.0886039		K	1	1	0.965174	0	0
R	-0.0279612	-0.0265008	-0.0241419	0.0206094	0.0194903		R	0.99005	0	0	0.0159204	0.569154
E	-0.0279243	-0.0306992	-0.033741	0.0161383	0.058806		E	0.793035	0.713433	0.999005	0.040796	0
D	-0.028382	-0.0358128	-0.0330342	0.0179845	0.0428808		D	0.949254	1	1	0.00298507	0
*	0	0	0	-0.126785	0.0375596		*	0	0	0	1	1

## Sheet: 2D aminoacid heatmap
2-dimensional representation of stalling propensities with the corresponding aminio acid residue located in the P- and A-sites																							2-dimensional representation of stalling propensities with the corresponding aminio acid residue located in the E- and A-sites																							2-dimensional representation of stalling propensities with the corresponding aminio acid residue located in the E- and P-sites
P\A	Amino acid residues located in the A-site																						E\A	Amino acid residues located in the A-site																						E\P	Amino acid residues located in the P-site
	W	Y	F	I	L	V	M	A	T	S	G	P	Q	N	H	C	K	R	E	D	*			W	Y	F	I	L	V	M	A	T	S	G	P	Q	N	H	C	K	R	E	D	*			W	Y	F
W	-0.00850373	-0.0231516	0.0025994	-0.0411781	-0.0346991	-0.00369187	-0.0404	-0.0125621	-0.00933491	-0.014934	-0.00552871	-0.0273751	-0.0198185	-0.0209321	-0.0193284	-0.0276108	-0.0444589	-0.0182076	-0.0149074	-0.0210338	-0.139907		W	-0.0279105	-0.0160947	-0.00626953	-0.0180918	-0.0286545	-0.0074271	-0.0137203	-0.0169787	-0.0243591	-0.0340167	-0.0195141	-0.0240143	-0.0131618	-0.0226489	-0.0247056	-0.0237883	-0.0244431	-0.0181084	-0.0435118	-0.043546	-0.141119		W	-0.00896086	-0.0428395	-0.0063334
Y	-0.00936535	-0.0133307	0.0133919	-0.0368423	-0.0350718	-0.00613426	-0.0506961	-0.0159267	-0.0366758	-0.0299009	-0.0138687	-0.0260438	-0.0263613	-0.0543143	-0.0209825	-0.0218173	-0.0570105	-0.0376006	-0.0251483	-0.0119077	-0.107457		Y	-0.0339288	-0.0333415	-0.0314773	-0.0182148	-0.0326089	-0.0224121	-0.0287775	-0.0312024	-0.0414125	-0.0320241	-0.0200766	-0.0310295	-0.0202987	-0.0684194	-0.0257772	-0.0370773	-0.0450875	-0.028488	-0.000112283	-0.0371935	-0.11064		Y	-0.0177174	-0.0437918	-0.0272204
F	-0.0129853	0.00529364	-0.00269839	-0.0316607	-0.033883	-0.00115856	-0.018662	-0.0240183	-0.0260941	-0.0350315	-0.016661	-0.035431	-0.0275455	-0.0364814	-0.00772667	-0.0258255	-0.0326649	-0.0345929	-0.0230514	-0.0320575	-0.134519		F	-0.0158652	-0.0339349	-0.0302074	-0.0344264	-0.034663	-0.0222081	-0.0503529	-0.0229303	-0.0409185	-0.0421876	-0.0233477	-0.0288642	-0.0360393	-0.0546939	-0.0239605	-0.0298376	-0.0619335	-0.027714	-0.0395262	-0.0359513	-0.0994661		F	-0.0350865	-0.0264336	-0.0360148
I	-0.0153529	-0.00740466	-0.00551135	-0.0152243	-0.0364179	-0.0131699	-0.0181323	-0.0224577	-0.036576	-0.03091	-0.0220378	-0.0258539	-0.00938702	-0.0431881	-0.0285515	-0.0130456	-0.0466512	-0.0283823	-0.0366485	-0.0435979	-0.191516		I	-0.02067	-0.0246731	-0.026161	-0.0332844	-0.0372975	-0.0100348	-0.0110553	-0.026424	-0.0294058	-0.0480568	-0.0216425	-0.0289584	-0.0240514	-0.0567703	-0.0312128	-0.0294826	-0.0584893	-0.0387753	-0.0435676	-0.0592496	-0.165481		I	-0.0369456	-0.0525985	-0.0251124
L	-0.0232852	-0.0205389	-0.0180579	-0.0265181	-0.0295928	-0.0123412	-0.0265501	-0.0221954	-0.0266715	-0.0295601	-0.0129115	-0.0241377	-0.0181988	-0.0587395	-0.0221308	-0.0185991	-0.0424644	-0.032338	-0.0480307	-0.0306119	-0.113904		L	-0.0268852	-0.0383595	-0.0164604	-0.0309288	-0.0330566	-0.0186975	-0.0283142	-0.0258671	-0.0309878	-0.0362013	-0.0174105	-0.0245363	-0.0258687	-0.0404651	-0.0236958	-0.0200348	-0.0507662	-0.0273352	-0.033166	-0.032262	-0.0965919		L	-0.0247668	-0.0272869	-0.036059
V	-0.0198471	-0.0178928	-0.0138324	-0.0159656	-0.023912	-0.00843208	-0.023425	-0.0172493	-0.0233466	-0.0301328	-0.0158377	-0.0206466	-0.0261386	-0.0427068	-0.0253124	-0.0215237	-0.0195046	-0.0178651	-0.0349742	-0.0303093	-0.132796		V	-0.0331736	-0.0369043	-0.0167557	-0.0346836	-0.0388444	-0.0156407	-0.0162237	-0.0243755	-0.0376623	-0.0343679	-0.0248308	-0.0312552	-0.0399621	-0.0497537	-0.0333787	-0.0184955	-0.0410712	-0.0322333	-0.0464223	-0.0332366	-0.148352		V	-0.0251512	-0.0374916	-0.0287138
M	0.0160185	-0.00170455	0.0747424	0.0639765	-0.00428311	0.0695515	0.0202198	0.00279802	0.0144115	-0.0104432	0.0211675	-0.0191157	0.0225075	0.0252352	0.026032	-0.0184846	0.131966	-0.00530644	0.0114639	0.0743317	-0.154456		M	-0.0447382	0.000611069	-0.00365357	-0.0340336	-0.02526	-0.0122464	-0.0467634	-0.00809619	-0.0395675	-0.0391375	-0.00494986	-0.0159367	-0.0185417	-0.0607258	-0.0363713	-0.02881	-0.0607891	-0.0263799	-0.0455506	-0.056264	-0.171432		M	-0.0286742	-0.0163086	-0.0350921
A	-0.028111	-0.0209259	-0.0183579	-0.0162779	-0.0310667	-0.0144246	-0.0157196	-0.0178077	-0.0298933	-0.0293766	-0.0173299	-0.0222224	-0.0211263	-0.0344162	-0.024819	-0.0304892	-0.0315544	-0.0236361	-0.0340459	-0.0333983	-0.14874		A	-0.0275632	-0.0285306	-0.0158349	-0.0297484	-0.0353848	-0.022951	-0.0251405	-0.0248092	-0.0297122	-0.0313198	-0.0222458	-0.0441097	-0.0219303	-0.0440937	-0.0265756	-0.0353257	-0.0509932	-0.0288495	-0.0432708	-0.0429456	-0.130093		A	-0.0216203	-0.0406968	-0.0324925
T	-0.0346068	-0.0259105	-0.00979481	-0.019653	-0.031765	-0.012607	-0.0252998	-0.02229	-0.0345906	-0.0301905	-0.0134936	-0.023993	-0.0222941	-0.0264352	-0.0138812	-0.0274289	-0.032449	-0.0285952	-0.0259752	-0.024073	-0.201948		T	-0.0280324	-0.0245347	-0.0178905	-0.0345045	-0.0428985	-0.0217416	-0.0324371	-0.0154499	-0.0270033	-0.0326828	-0.0229103	-0.0297568	-0.0306309	-0.035012	-0.0300199	-0.0346936	-0.0463266	-0.027211	-0.036445	-0.0258669	-0.126416		T	-0.0219401	-0.0174038	-0.0366648
S	-0.0233558	-0.0244218	-0.0160614	-0.0307319	-0.0348979	-0.0130166	-0.0255203	-0.0276502	-0.0287718	-0.0348999	-0.0181832	-0.0249117	-0.0236798	-0.0544756	-0.0312967	-0.0286552	-0.0413404	-0.0294636	-0.0374097	-0.0428867	-0.1607		S	-0.0305712	-0.0323314	-0.0203571	-0.0344011	-0.0307144	-0.0160072	-0.0203981	-0.0226106	-0.0341271	-0.0296443	-0.0214409	-0.0410635	-0.0226062	-0.0466102	-0.0288588	-0.044872	-0.0367085	-0.0282434	-0.0321174	-0.038443	-0.100014		S	-0.0302734	-0.0235688	-0.0305181
G	-0.0247109	-0.0298539	-0.0140339	-0.025828	-0.0300455	-0.0121722	-0.0240232	-0.0150661	-0.0266484	-0.0230516	-0.0142254	-0.019421	-0.0251004	-0.0302028	-0.0244675	-0.0243419	-0.0378012	-0.0187391	-0.0244622	-0.0247959	-0.167478		G	-0.0235611	-0.0332655	-0.0167489	-0.0148165	-0.0296342	-0.0113816	-0.0253892	-0.0195042	-0.0312613	-0.0258176	-0.0194345	-0.0426354	-0.0232197	-0.041056	-0.0238668	-0.0291091	-0.0454602	-0.0222366	-0.0291521	-0.0217845	-0.0975064		G	-0.0134001	-0.033002	-0.0275025
P	-0.0452081	-0.0356611	-0.0171575	-0.0306604	-0.0379343	-0.0204545	-0.018943	-0.0273065	-0.0415133	-0.0334573	-0.032955	-0.0744724	-0.0337707	-0.059303	-0.0317334	-0.0486011	-0.0504723	-0.0340841	-0.0512838	-0.0497154	-0.184276		P	-0.0472233	-0.0326085	-0.0186154	-0.0320562	-0.0431052	-0.0240207	-0.033266	-0.0320435	-0.0390132	-0.0355508	-0.0322324	-0.0402204	-0.0331589	-0.0620635	-0.0343852	-0.0274283	-0.0418176	-0.0338331	-0.043141	-0.0433444	-0.141432		P	-0.0327395	-0.0262347	-0.0335984
Q	-0.0225237	-0.035601	-0.0195509	-0.0285142	-0.0336764	-0.0178871	-0.0197668	-0.0241659	-0.027432	-0.0308129	-0.0208122	-0.0208237	-0.038651	-0.0340975	-0.0197804	-0.0129721	-0.0243052	-0.0243379	-0.0370182	-0.0359323	-0.132173		Q	-0.0260267	-0.0423518	-0.0307481	-0.0469268	-0.0337172	-0.0192135	-0.0297744	-0.0238979	-0.043366	-0.0391924	-0.0143772	-0.0247854	-0.0340696	-0.0448703	-0.0251145	-0.02645	-0.0405426	-0.0349235	-0.0381338	-0.0316051	-0.132391		Q	-0.0255519	-0.0384407	-0.0305419
N	-0.017539	-0.0429375	-0.0508415	-0.0233958	-0.0467672	-0.00892407	-0.0323422	-0.021944	-0.0355961	-0.0427501	-0.0211451	-0.0249075	-0.0330393	-0.0536432	-0.0358828	-0.0174568	-0.0409132	-0.0451197	-0.0362172	-0.0488261	-0.132775		N	-0.0399219	-0.0312951	-0.0238702	-0.0216156	-0.0329854	-0.0135285	-0.0262742	-0.0273115	-0.0395436	-0.0301656	-0.0200884	-0.0290748	-0.0387235	-0.0459241	-0.0156394	-0.0405965	-0.0350014	-0.0382512	-0.0358684	-0.0195407	-0.125137		N	-0.0373182	-0.0242401	-0.0302857
H	-0.0114938	-0.0389989	-0.0248164	-0.0297184	-0.028625	-0.0101791	-0.0233831	-0.0217188	-0.0278311	-0.0281407	-0.0164442	-0.0213876	-0.0136324	-0.0229356	-0.019794	-0.0291836	-0.0300625	-0.0300376	-0.0136168	-0.0267189	-0.0765407		H	-0.0383488	-0.0354745	-0.0207112	-0.0222185	-0.0327268	-0.0209517	-0.00629991	-0.0258946	-0.0363927	-0.0324467	-0.0206022	-0.0368534	-0.0211899	-0.0465351	-0.0305197	-0.0291476	-0.0440075	-0.0303695	-0.0227544	-0.0262841	-0.100835		H	-0.0282987	-0.041498	-0.0339967
C	-0.0272304	-0.019044	-0.00874541	-0.010471	-0.031089	-0.000495041	-0.0248126	-0.0147443	-0.0360423	-0.0228896	-0.0142068	-0.0258358	-0.0246734	-0.0413144	-0.0188139	-0.00931642	-0.0317686	-0.0243173	0.00877555	-0.0293763	-0.0965368		C	-0.0238956	-0.0253917	-0.00879784	-0.0229022	-0.0338551	-0.00790086	-0.0294978	-0.0239237	-0.0286749	-0.0322993	-0.0248252	-0.0254215	-0.0165525	-0.0338637	-0.0214865	-0.0163762	-0.0375576	-0.025391	-0.0397834	-0.0331676	-0.093813		C	-0.0337451	-0.0340136	-0.0257806
K	-0.026422	-0.00813815	0.0126283	-0.0315159	-0.0349725	-0.0120127	-0.0115166	-0.0187076	-0.0164397	-0.0224954	-0.0266559	-0.0248727	-0.0256274	-0.0473674	-0.0371179	-0.03316	-0.0371033	-0.0430345	-0.0202384	-0.0284916	-0.148914		K	-0.0236674	-0.0503427	-0.0330871	-0.0193791	-0.0391196	-0.0171941	-0.00897059	-0.0325608	-0.0415089	-0.0403527	-0.0188639	-0.0290928	-0.034825	-0.0460106	-0.0351174	-0.0341507	-0.0608291	-0.0457021	-0.0590313	-0.0394338	-0.130476		K	-0.0346374	-0.0536475	-0.0416915
R	-0.025488	-0.0169509	-0.008876	-0.0190163	-0.0292055	-0.00393523	-0.0274786	-0.0147548	-0.028371	-0.0264046	-0.0117779	-0.0197354	-0.025976	-0.046982	-0.0242912	-0.0182995	-0.05678	-0.0200344	-0.0280001	-0.0185895	-0.124347		R	-0.0236713	-0.0269417	-0.0221209	-0.0227717	-0.0335063	-0.0160098	-0.0173716	-0.0218993	-0.0284866	-0.0231332	-0.0165462	-0.0245054	-0.0276551	-0.0433146	-0.0274437	-0.0253413	-0.050441	-0.0289273	-0.0269049	-0.0260274	-0.0702724		R	-0.0201539	-0.0393055	-0.0403387
E	-0.0313551	-0.0354897	-0.0361307	-0.0431074	-0.0380868	-0.0304891	-0.0181878	-0.0276315	-0.0323321	-0.0463662	-0.0193759	-0.0249641	-0.0429036	-0.0606165	-0.0218977	-0.0205228	-0.0222238	-0.0313727	-0.0545328	-0.0470099	-0.131358		E	-0.0320661	-0.050199	-0.020744	-0.0204908	-0.0393593	-0.0185288	-0.0347046	-0.0312253	-0.03497	-0.0378594	-0.0112691	-0.0382776	-0.0633261	-0.0505899	-0.0228694	-0.025611	-0.0386018	-0.0304647	-0.0419822	-0.0353042	-0.126333		E	0.00573746	-0.056472	-0.0312532
D	-0.0386009	-0.0196778	-0.0179145	-0.0373723	-0.0456359	-0.0123419	-0.0273308	-0.0249421	-0.0279329	-0.0425621	-0.0218982	-0.0263223	-0.0198879	-0.060243	-0.0265839	-0.0289775	-0.0725253	-0.0301674	-0.0480159	-0.03851	-0.14897		D	-0.0335196	-0.0412565	-0.0284602	-0.0364353	-0.0423533	-0.03015	-0.0282111	-0.0286429	-0.0385186	-0.039269	-0.0295717	-0.0570583	-0.027347	-0.0616113	-0.0354034	-0.0421718	-0.0645996	-0.03001	-0.0458859	-0.0612763	-0.137055		D	-0.0425468	-0.0522384	-0.0390305
*	N/A	N/A	N/A	N/A	N/A	N/A	N/A	N/A	N/A	N/A	N/A	N/A	N/A	N/A	N/A	N/A	N/A	N/A	N/A	N/A	N/A		*	N/A	N/A	N/A	N/A	N/A	N/A	N/A	N/A	N/A	N/A	N/A	N/A	N/A	N/A	N/A	N/A	N/A	N/A	N/A	N/A	N/A		*	N/A	N/A	N/A
[truncated: 40 more columns]

[truncated: 1 more sheets: P-value 2D aminoacid heatmap]
