# Supplementary material for: Context specificity of translation inhibitors revealed by toe-seq
Source: Research Square preprint supplement (doi:10.21203/rs.3.rs-3832009/v1), 2024-04-03
Supplement: Supplementary file 8 [file c7603e48678fcee23291331a.xlsx]

## Sheet: Title
Supplementary table 9
Correspondence dictionary of randomized coding regions and barcode sequences.

## Sheet: Dictionary
mRNA template type	mRNA coding sequence	Barcode sequence
A2	ATGATGGATGTTACAGTCCCGATCGGGGCTCACAAACGCGGGAAGGGAACATAA	ACTGCTGGGGGCCGC
O2	ATGAGACAAGTGTAGGTGGCTGGTTTCGGTATCAAACGCGGGAAGGGAACATAA	ACGCAAAGAGTTCTT
A2	ATGCAAACACACAAAGCCACAGCACGCATCCGTAAACGCGGGAAGGGAACATAA	AGCACACGCAGAGGA
A2	ATGATAGTGCACACCTCTCGCAGTGTCGCGTGAAACGCGGGAAGGGAACATAA	CGGCGCGAGCGGTTC
O2	ATGGTGGCCACTAGGCAGCACCCATAAAATGAGAAACGCGGGAAGGAAACATAA	CCGACAGGGAGGCTC
A2	ATGTTATCAACGCGTGCATAACGACCCTCGCTCAAACGCGGGAAGGGAACATAA	CTGCGCGCCGAGTAG
A2	ATGCATTGTAAGTAAACAGGTTGCTGCACGCGAAACGCGGGAAGGGAACATAA	AGACAGCGACATTTC
A2	ATGCGGGGCGCCGCGGGAGAATTAACGCTCGCCAAACGCGGGAAGGGAACATAA	GGAGCGACGCTGCTG
A2	ATGGGGCAGCAGGTAGCAGTCAACAAGGCGCGCAAACGCGGGAAGGGAACATAA	TAGCTGGGACCGGCA
A2	ATGTTGCATGGGACGTGGAATAATGCTAAGACGAAACGCGGGAAGGGAACATAA	TGAGGAGCACTGCCG
A2	ATGTGGGGGCTCGGATCCTTCACAGTGCCCGCTAAACGCGGGAAGGGAACATAA	GGGAGTGCTGCCCGC
O1	ATGGGCGCCAGGCTCCGGCCCTGCCCCACCCGCAAACGCGGGAAGGGAACATAA	GGGGTCGGGTCGCCC
O2	ATGAATAGACCACACCAGAGCGGTAGAGTGCCCAAACGCGGGAAGGGAACATAA	GGCGTGCGTGTGTTC
A2	ATGGGGTTTCGCATCATCTGGCGCGTGACGTCTAAACGCGGGAAGGGAACATAA	AGCGCGCGCCACCGA
A2	ATGGGCGTCGTCACGCGTAAAACTGCCGGCTTTAAACGCGGGAAGGGAACATAA	GTTCACCCCCGTGCA
A2	ATGAGATCAATCGGAACACGAACGGCGCACCGGAAACGCGGGAAGGGAACATAA	GCCTGGCCGCATCCT
A2	ATGGTGGTTTTCAGCAGCTGGTATCGGCGCGTGAAACGCGGGAAGGGAACATAA	CGGGAAACTTCCCCC
O1	ATGCCCGCGAGTATTGTTACAAGGGAACCCGCTAAACGCGGGAAGGGAACATAA	CGCTGTGCTGGTTCT
A2	ATGTGGGTGCGCGGGTGGTGGACCGCTGTTGGGAAACGCGGGAAGGGAACATAA	CGACGCCAGTGGTT
A2	ATGATACACCAGTAAACATAACGAAGGCCCGCGAAACGCGGGAAGGGAACATAA	CCGCCGTGACCGTCG
O1	ATGTGACCTAGTGGTGCCAGCGCCTTCTGCGTAAACGCGGGAAGGAACATAA	ACTCTGTTGAACACT
A2	ATGTCATACATGTTAAGACGAAAGGCGGCGCGTAAACGCGGGAAGGGAACATAA	GCCTTAGGGCAAGGT
A2	ATGAGGCCCCGCCTCGAGTTCGTCGCGCCTCGCAAACGCGGGAAGGGAACATAA	GCGTTATATGGCAGA
A2	ATGTGTTGTAGGTAGGGAGCGCAATCGACGGTCAAACGCGGGAAGGGAACATAA	GCGGCCTAACAAGCC
A2	ATGATTCTTGCACACAGCGATATCGCCGTTTCTAAACGCGGGAAGGGAACATAA	GAAGAACGCCTCCTG
A2	ATGGGGGCGTCCCTTCCGACCGCCCGGGCCCGCAAACGCGGGAAGGGAACATAA	CTAGCAAGAGCGAGA
O2	ATGTCAGTGTCCTCAGTCCCCACGCCTTACTTTAAACGCGGGAAGGGAACATAA	TTGCTCTTTCTTGTC
A2	ATGTGAGATGCTTGGGTGACGGCCCGAGGCGCGAAACGCGGGAAGGGAACATAA	AGCGGCGCGTCGCCC
A2	ATGCGTGACAGCGCCACACAACGCGGACTCTGAAACGCGGGAAGGGAACATAA	GTCCGTGCCCGAACT
O2	ATGCGTGTGGTTGCAATACACGTCCACGGGAATAAACGCGGGAAGGGAACATAA	GCGGGCGTCCGTAC
O2	ATGCCATTACCGCTCGGGCAGCGAGTGCCCCTCAAACGCGGGAAGGGAACATAA	GGCGTCACGCCTGGC
A2	ATGGTCCACGCGAAATCACAGCTCCCCGCGTCCAAACGCGGGAAGGGAACATAA	GGGGGCTTCGACCGG
A2	ATGAGTGACAACTGACATGCCAGCATGGGCCGGAAACGCGGGAAGGGAACATAA	GGAATTTCGGAGGAA
A2	ATGCGATCCGGCACCCTGACAAAAGATCACCGCAAACGCGGGAAGGGAACATAA	CGGGACCGCGTCCGG
O2	ATGCGTGGGCGTGGCTACTGCTGCTCTGGCCGTAAACGCGGGAAGGGAACATAA	GGGGGGCGGGGTCGG
O2	ATGCCGTAACTCCTGCGTGCGGTGGCGCGGGTCAAACGCGGGAAGGGAACATAA	GGCATGTCCGAACGC
A2	ATGAGCGTTTGCGGTATCACGACACCCCCCGCCAAACGCGGGAAGGGAACATAA	CGCGAGAGGCGGGAG
A2	ATGGTTTATAATACAGGCAGCGAACCCCTTCGGAAACGCGGGAAGGGAACATAA	GTGTGGGTTCGCGCA
A2	ATGAATCATCAGCTCGACGGACCTCGTCCATACAAACGCGGGAAGGGAACATAA	ACAGGCCGCCAAGTG
O1	ATGGTGCGCTGATATTTCAGACACGACCCCGTAAACGCGGGAAGGGAACATAA	GATGCTGGGGCCCTC
O2	ATGGTGCGTCCTCGACTAGTTCCTCCCCCGCACAAACGCGGGAAGGGAACATAA	TGCACCGGGATTCGC
A2	ATGCGTCAGATCACGGGCGCCATTGGCACCCTCAAACGCGGGAAGGGAACATAA	AGTCCGTCAGACGCG
A2	ATGATCCAAACGGACAACCAAATGCGTACCGGCAAACGCGGGAAGGGAACATAA	AGCCGACTGACTGCG
O1	ATGGCGCCATCGCCCCGCGTATCAACGATGTATAAACGCGGGAAGGGAACATAA	GGGTAGGGGGATGGA
O2	ATGGCCGATACGCTCTTACTGTGCGGTTCGCCCAAACGCGGGAAGGGAACATAA	TCTTGTGCCCGATGC
A2	ATGGCCGATCACATTATCATCACATACGACATCAAACGCGGGAAGGGAACATAA	AGACCCGACCGGGGC
A2	ATGAGTAGTGGCCGAGAAACCCAATCAAGCACCAAACGCGGGAAGGGAACATAA	TGACACGTCGGCCGG
A2	ATGCTGGATGCAAGTCGTTTCACACATTTGGTCAAACGCGGGAAGGGAACATAA	GTGGAGGCGTACAGG
A2	ATGGTCCGACAGCCGTGGGTGACGGCGCCCGCGAAACGCGGGAAGGGAACATAA	GGAGAATCGCACGAG
A2	ATGCGGCGCCCCCGCGCGGACGCGGCGCGGCGCAAACGCGGGAAGGGAACATAA	CTAAGGCTGCCGCAA
A2	ATGAGTGACGATGGGTACAGCCTCCATCGTCGGAAACGCGGGAAGGGAACATAA	CTGGCATGCATAT
A2	ATGAGTTGTCCGGTTGAAAGCCCGTGGTCGGTCAAACGCGGGAAGGGAACATAA	CGAGGTCGGCCTTTT
O2	ATGGGCCTTACGCCGCTGCCAGCGCCGCGTTCTAAACGCGGGAAGGGAACATAA	CCACCCATCGCAGCC
O2	ATGAAAACACATTACATGTCCCAGTTCACCGTTAAACGCGGGAAGGGAACATAA	AGAATACACTAGCTC
A2	ATGCTTATGTACTGGTGTTGATATGACCGTGCTAAACGCGGGAAGGGAACATAA	CAGGCGCGCGGTCCC
A2	ATGATTAAGATGTCATTACGGTCAGCACTTTACAAACGCGGGAAGGGAACATAA	ATTTGAGGCGACGGG
O2	ATGCTGTAACTCATCAGGCCATAGGCACATCTAAACGCGGAAGGGAACATAA	TGCGTAGCGGGACGC
O2	ATGCGTACACGCGTCCCGCGACGCATTTCTATAAAACGCGGGAAGGGAACATAA	GGTGACGAAAGCACG
O2	ATGCCTCCGGCCGTTTACACGTCCAGTCCGCAGAAACGCGGGAAGGGAACATAA	GCTCATGCGCGATGA
O2	ATGCTGACAGCCATCCCGACTTATCACACGCACAAACGCGGGAAGGGAACATAA	AGTCTGGCACTCCCG
A2	ATGGTAGATGACGGTTGAAAGGCATCCTACCCGAAACGCGGGAAGGGAACATAA	AGGTGACAACTTACT
A2	ATGCAACCGACCACCAAAACAGGCAACACACGGAAACGCGGGAAGGGAACATAA	CTAGGCACATCGGAC
A2	ATGAGTGCGGAGCCGGCGCAGTCGTAGACCTCCAAACGCGGGAAGGAACAAA	AACAAGGCCGGGGAC
A2	ATGGCGGGGCGGCCGCGCCGCTCTCCCGTCGCGAAACGCGGGAAGGGAACATAA	GGAAAGATGGCCCTG
A2	ATGTGCCATTCGTGTTAGATACACGCGAGCACTAAACGCGGGAAGGGAACATAA	GTCGAAGGGACTAG
A2	ATGCTTTAGAGCGAAACAGGGAACCGTATCCGGAAACGCGGGAAGGGAACATAA	GGTGTCAGACACGCA
A2	ATGCACAAAACTCGAAGAGACAAGTAGGACGTAAACGCGGGAAGGGAACATAA	TTTGGCAGGCTAGAC
A2	ATGACTCGGAAGATCAAAGAGGCGTGACGGGTAAACGCGGGAAGGGAACATAA	GTGGAGGCGCCGACT
A2	ATGGCCTAACAACACTCGCGCCACCCTCACGTCAAACGCGGGAAGGGAACATAA	ATAGTTCGGTTTTGT
A2	ATGCTACATCCTGTGAAACGCTAGCGGACTCGTAAACGCGGGAAGGGAACATAA	GCGCCGAGGGGCAGC
A2	ATGTGTTATCGGGTAGACAATGGGCCAAACGTCAAACGCGGGAAGGGAACATAA	GAGGCACCGATACTC
O1	ATGTTCATCCGGCTCACCATGATTTGGGCTTCCAAACGCGGGAAGGGAACATAA	TGTTCGGTGCCTCGT
O2	ATGTAGGTCGGACGGGACGACTGCAATCTACTAAAACGCGGGAAGGGAACATAA	ACACGTTGGGCACCT
O2	ATGCAATTTTAACAATTGTAGGACAGACTTAAAAACGCGGGAAGGGAACATAA	GCGACTGCGACTCCC
O2	ATGACCCGGGCGCATCAGTGGGGGTCCGCGTTCAAACGCGGGAAGGGAACATAA	TCGGGTCGTCGGAGG
O2	ATGCAAACCGACACCGTACGTGTGGGTGCCAACAAACGCGGGAAGGGAACATAA	TGGGCGGCCGGGACC
O1	ATGCCGCCGCACCGCACAAGCCAGTTCTCGGCCAAACGCGGGAAGGGAACATAA	TGGTACCGTGCAGTT
O2	ATGCCTGAACCCCAGTCGGTTGGCATTTTTCACAAACGCGGGAAGGGAACATAA	ATCGGCCGAGTGGGA
A2	ATGTTTTGTCTCAGCTGGGACACCCTTGTCTGTAAACGCGGGAAGGGAACATAA	CGTAGGCCACCGCTT
A2	ATGAACCTAACGTAACTCCGAACGTGCCCACATAAACGCGGGAAGGGAACATAA	GCTGGCTGGATTTTT
A2	ATGGGCTCGCTAGGGCCGAGCAGGTTTACCGTCAAACGCGGGAAGGGAACATAA	AAGTCGACGTGCGCG
O1	ATGGGATTTGGCTTGCCCCGCCGTGGCTTCCCTAAACGCGGGAAGGGAACATAA	TTAACATAACACTCG
O1	ATGTACGCGACGAGCAGGCTCTTACTCGCCAGTAAACGCGGGAAGGGAACATAA	CTGGGCCGCTGCCTT
O2	ATGCTAATGGCGTAGCCACTAGCCTCGAAAAGCAAACGCGGGAAGGGAACATAA	GTCTGGGGCTCACGG
O2	ATGCATCACCGGGTGGACCGTTACCTATCGGCCAAACGCGGGAAGGGAACATAA	ATGGCTGAGGTACTG
O2	ATGTACGAACCAGCTTGGCTATGCCCGATCCAAAAACGCTGGAAGGGAACATAA	CCAGCGGTCCCCATC
A2	ATGATAACCAAGTTGACCCCATCCACCGCGTCGAAACGCGGGAAGGGAACATAA	TTGCGGGCGGCGCGG
A2	ATGGGTCTGCATTGTTACGAGAAAACGAATTCCAAACGCGGGAAGGGAACATAA	CCGCAGTGCATGCGC
A2	ATGGCGAAGTATGAGACGGTCAGCAGCAACTACAAACGCGGGAAGGGAACATAA	AGGCGAGGCGGACCG
A2	ATGCTCCATAATCCCCGAGGCTCAATGTCCCGCAAACGCGGGAAGGGAACATAA	GAGCTGATGGGAGAA
A2	ATGCGTGGTGTTGCATGACGCACCGGTCTGTCCAAACGCGGGAAGGGAACATAA	CGGGCGTCAATGCGA
A2	ATGGGGTGGGGCTCGACGCGCTAATCCAGGCCCAAACGCGGGAAGGGAACATAA	CTGTGGAGGCGCAAT
A2	ATGGTGGGGAGTCAGAGCCGAGCAATATCCTTGAAACGCGGGAAGGGAACATAA	CCCTGCAGAGAAGTT
O1	ATGACGGCAGCTCTCGCCAGGCGCGTTGGAGTCAAACGCGGGAAGGGAACATAA	TAAGCGACGCCTCGC
O1	ATGCCGGTGCCAAACCCTACCCGCGAAGCTCTCAAACGCGGGAAGGGAACATAA	GTCGCCGGGGGGGAT
O1	ATGTACTCCACGGCGCGTCCGCGTCCGGCCGTTAAACGCGGGAAGGGAACATAA	TCCGCCGGTCGGGTT
A2	ATGGGGTGGCTCGCCCCCGCGGCGCTCAGCCGCAAACGCGGGAAGGGAACATAA	TGTGTACGCCTCAC
A2	ATGGTACATTATGCACCAGCATCACTACTGGGGAAACGCGGGAAGGGAACATAA	AGTCATAGCCGCCGG
A2	ATGCGCGTCACTCCGCGGGCTAGCCTGTCCCTGAAACGCGGGAAGGGAACATAA	TGTTAACCGCAGACT
A2	ATGGGTCCTGGTGAACGGGCCTACGACTCAACGAAACGCGGGAAGGGAACATAA	AGCGGCTCATCGAAT
A2	ATGCCATTTATAATCAAACAAACACAGCCCGCGAAACGCGGGAAGGGAACATAA	CACCCAGCCTTAGTC
O2	ATGTGGTAGTTGACCGCAAATTACAGCCCACATAAACGCGGGAAGGGAACATAA	GGTGTTGGTTCCTTG
O2	ATGGCTTCGGGCCCTAAGGTCCTCCTTATCGCGAAACGCGGGAAGGGAACATAA	GGGCCTGGAATCGCC
O2	ATGCTCGCGCACCAACCTCTTAAATGTTCGACGAAACGCGGGAAGGGAACATAA	TCAGGCGCCGGCATG
O2	ATGGCACGTGGGCTATCGGCCGAAGAGCACGACAAACGCGGGAAGGGAACATAA	GAGGCGATGACTACG
O2	ATGGTCTCGGCCATCGCTGCCATTATCTGGCAGAAACGCGGGAAGGGAACATAA	AGCGGACTGAATGG
O2	ATGGCCTGAGCGCTACAACAGCTTTAAACGCGGGAAGGGAACATA	CATAGGTGCGACCGC
A2	ATGTGGGCTCATCCCACGCGTGAGATATCGAAGAAACGCGGGAAGGGAACATAA	CGAGTGGGCCCAGCA
A2	ATGTATAAGCTCTCTTGGCGCAGTCCCCTCGCCAAACGCGGGAAGGGAACATAA	TGAGTAACGCCTTTT
A2	ATGGGGTGGGCGCGACGGTTGATCGACGAGGGTAAACGCGGGAAGGGAACATAA	TGTCCTGTCTTTGTG
A2	ATGGACCACAACTACGCAGGCAAGCGTTGAGAAACGCGGGAAGGGAACATAA	AGACTCCGTGCGAAG
O2	ATGGCTACCCCCGAAGGCGAAGCCTCCGACGCGAAACGCGGGAAGGGAACATAA	GGTGTGGGCTCCGAC
O2	ATGATCAGTGCACCCAGTTGCGGATAGCGTCCAAACGCGGAAGGGAACATAA	CCCCAGCCAGTCCGG
O2	ATGTGCCCCACTCGAATTCGGACCTAGGTACCAAACGCGGGAAGGGAACATAA	ATTGCGGGACGTCGT
A2	ATGGCGTATAACCTCAAAGATAAGCAGTCGCTCAAACGCGGGAAGGGAACATAA	GGGACGGATTAGGGG
A2	ATGCCAAGACGGTAAGAACAACCAACCGGCCTGAAACGCGGGAAGGGAACATAA	AGCGGGACGGGGCCT
A2	ATGTCCGGGTTTTGCTTTTGAATCAATCTGCGCAAACGCGGGAAGGGAACATAA	GTGCGCCCGCTCCAC
A2	ATGGACTAGCCGCGTCTGGTAGGTCTTCCGCAAACGCGGGAAGGGAACATAA	CGGAGCGACTGGCAG
A2	ATGGTCGTGCGCGCACTCTCCACTGCGGTCTCCAAACGCGGGAAGGGAACATAA	TAAGGCGCGACCCCA
A2	ATGCAGCGCGGACGGCCCACCGAGGCGTTCGCCAAACGCGGGAAGGGAACATAA	ACTGGGGCTGCCGA
A2	ATGTATTTTAACGAACCGAGTGCCCGCTCTCGTAAACGCGGGAAGGGAACATAA	GCAGGCCTGGCTGGC
A2	ATGTCACCACGGTGGGGATGGCCAGCCAAAGGCAAACGCGGGAAGGGAACATAA	CCGCGGAGGGATGGC
O2	ATGGCGGCCCAGTCCGACCGGGTATCCGCGATTAAACGCGGGAAGGGAACATAA	GGCAGGTCGCCGTGC
O1	ATGTCCCCGGGATTGGCCGGCACTGTTCGGTGTAAACGCGGGAAGGGAACATAA	AAGCGTGCTCTGTGT
O1	ATGCCGCGGCACCCCCGTTGCGCCGGCACGAAACGCGGGAAGGGAACATAA	GTTCAACCTGGCTTG
A2	ATGTATGATGACGGGCGAGTCCAGCCCCCGCCTAAACGCGGGAAGGGAACATAA	GTGGACGGCCGAGAT
A2	ATGGATGGCCATTGTTAGGCTAGTCTCCACAAGAAACGCGGGAAGGGAACATAA	GGCTACTGGTCCGAC
A2	ATGGGTCGCCGCGACTGCGGCCATCTTGAAGCTAAACGCGGGAAGGGAACATAA	AGCCGCGCCCCAGAT
A2	ATGACATCCAGTTAAGTAGACACCCCGGCAGCAAACGCGGGAAGGGAACATAA	GCCGGCACGCCGGAG
A2	ATGCCGCAAGAAACCAATAGACACCGCTCAGAGAAACGCGGGAAGGGAACATAA	GTGCCTTTTCTAAGT
A2	ATGGATGTTGCGTGGTCAAGTTTTTGGGCGCACAAACGCGGGAAGGGAACATAA	GGGACCCGTGGAACG
A2	ATGTCTGCGGGCGCCGCGTCGACTCGTCACGCTAAACGCGGGAAGGGAACATAA	CTATAGTCATGTGGG
A2	ATGCTCCATCAGAACCAATCCAATCACGCCTCCAAACGCGGGAAGGGAACATAA	AGCGGGTGGAGATAG
A2	ATGGAATAACAGATCTAAAGAGCCGCTATCCGGAAACGCGGGAAGGGAACATAA	TCGTCCACGAATGAA
A2	ATGTTGAGGGCCAGCGTGCGTAGGCGCGAGCGCAAACGCGGGAAGGGAACATAA	GTCGTACGGCAGGAA
A2	ATGGGGGGTCCCCGTGCAGTCCCGTCCGGCCGCAAACGCGGGAAGGGAACATAA	CGCGGGAACCCTGCA
A2	ATGGCTGTGGAGCACCGGTCGTCTCCCGCCCACAAACGCGGGAAGGGAACATAA	GGCAGCGCAACACAC
O2	ATGTTGCATGGGGACTAGGCCTTTCGCATCCTAAACGCGGGAAGGGAACATAA	AGAGGGAGAGTCGCC
O2	ATGAATATGTGGTCCGGGGGCTCAGCCGTTCGTAAACGCGGGAAGGGAACATAA	GGTGGAAGCCGGGGG
O2	ATGCAACCGGGTTCGGCAAGGGCCCATTGGCTTAAACGCGGGAAGGGAACATAA	GCCTGGGCAAGGGTT
O2	ATGGCTCGCCGGGCGGCGAACAACAACCACCGCAAACGCGGGAAGGGAACATAA	ATACGAGGGGCAAAA
A2	ATGGCTGAGATTGTGAGCATACAAGCCACATAGAAACGCGGGAAGGGAACATAA	TTGATGATAACAATA
A2	ATGAAATCGGCGCGAGTTTTACAAGGGTCGGACAAACGCGGGAAGGGAACATAA	CGCGTGCTTGTCGGT
A2	ATGTTAAACATCCGACGTGCGCGCGACACCGTCAAACGCGGGAAGGGAACATAA	TGGTCATAGTGCGCG
A2	ATGCGGCCGGACTCGCCCGACGCCCCTCCGCTGAAACGCGGGAAGGGAACATAA	GAGACGGCGGCTCCC
A2	ATGAAAGAAAGCCAACAGCGACCGGCGACCATTAAACGCGGGAAGGGAACATAA	CTTATGGTACGTAGT
A2	ATGGTATCTAAGCAAACGAGGGACCCTCAGAGTAAACGCGGGAAGGGAACATAA	AGGGGACCACATACG
A2	ATGGCTTGGATCTCGTGGTGCTCTTGTTCGACGAAACGCGGGAAGGGAACATAA	AGGCTTCAAGTACTG
A2	ATGAGCTCATTGGTACTGGCCACAGCGACCGCCAAACGCGGGAAGGGAACATAA	CTCCGCCGGAGGACG
A2	ATGGGTCCGGCCCGGCGCAAGCCCCGGGCGCACAAACGCGGGAAGGGAACATAA	AGGCGGACGATGCAA
O1	ATGCCGCCCTCTAGCGGCCTTCCCCGCCCCAGTAAACGCGGGAAGGGAACATAA	ACGCCGGCGTCCCGG
A2	ATGTGCGACCTCACTACTACAAGTACCTAGGTCAAACGCGGGAAGGGAACATAA	TCGAGCTCGCGGAGA
O2	ATGTTTATACGAACACGTCACACAAAGACGCTTAAACGCGGGAAGGGAACATAA	AGGCCATCAGGGTAG
O2	ATGCGCGGGCCCGTGTGTCGTTGCCCCTCCAACAAACGCGGGAAGGGAACATAA	CGTGTGGTGCCCCTG
O2	ATGCGCGTCTGCACTCGCTCCGCGTCTCGTCGGAAACGCGGGAAGGGAACATAA	GGCCGTGCAGGGTAA
O2	ATGCAAAGCCATCAGTGGCAGTTTACTCGCCTCAAACGCGGGAAGGGAACATAA	TTTGGGGCACCAGGC
O2	ATGAAGCTCACGGCGGGGGACTGGCTACCGTCTAAACGCGGGAAGGGAACATAA	TCGGCGACAGGACGC
O2	ATGCTCGATGCGCGAGGACCGCACATCGTGACCAAACGCGGGAAGGGAACATAA	AGGTGGACTCGCCGC
A2	ATGACGCGCGCTGGCACCGCTCCGGGCAAAGGCAAACGCGGGAAGGGAACATAA	TCAGAGCCGGCGGAG
A2	ATGCATTACCTCACACCATCTAGTCACTGTTGCAAACGCGGGAAGGGAACATAA	GCCGGCATATGGGAC
A2	ATGCGTTCGCCGCTGTCCTGCTAACCGGCCGCCAAACGCGGGAAGGGAACATAA	GCGTCCCTATCGAC
A2	ATGGGGGGTTGCGGACCGCACCCCACGACGCTCAAACGCGGGAAGGGAACATAA	AGGCACGGTGCCCTC
A2	ATGACTGCACTCGGACACGTGTAGCGCGGCTCGAAACGCGGAAGGGAACATAA	ATTCGCGCTGCAAGC
A2	ATGAAAAAAAAAGAAACACGAAACCGGACGCGGAAACGCGGGAAGGGAACATAA	AAACGTGGTAGCCCG
A2	ATGGTTTTGTGCTTGATAACCGGAGCCAACGATAAACGCGGGAAGGGAACATAA	GCCGGCACGGGCGC
O1	ATGCCGGGGCGCATATCTTGCACTCGCGGCCTCAAACGCGGGAAGGGAACATAA	GACGCTAGGACGCGT
O1	ATGCCCGCGGAGCCGTCGCCACGGTTGCGCGGCAAACGCGGGAAGGGAACATAA	ATACGCCAAGAACTA
O1	ATGTAACGTAATCTATCTCTTTCTTTCATATGTAAACGCGGAAGGAACATAA	TAACGCACTGCAAAA
A2	ATGGTTCGGTAGTAATCTTGACCAGCCGGACTGAAACGCGGGAAGGGAACATAA	GCGCGGGCTTGGGGA
O1	ATGCCACCGTCACTGCCGCGGGCCAGCACGCCTAAACGCGGGAAGGGAACATAA	GGTGGGCGTGCGGGC
O2	ATGTTTCTGGACTTATTCCGCCGGACCCGGCTTAAACGCGGGAAGGGAACATAA	GGTCGATGCAGGACA
A2	ATGTGGTAGATTTCACGAGGTGGGGCCGCGTGAAACGCGGGAAGGGAACATAA	TAAAATTCAGGGTCT
A2	ATGATAGTAGATCGAACCTCGCACTATGTCCGCAAACGCGGGAAGGGAACATAA	AGGCTGCGGCGGTAG
A2	ATGGCGCTGCGTCACCCTCCTCCGCTTCCCCACAAACGCGGGAAGGGAACATAA	AGTGACCCTGGCGAC
A2	ATGTCTGCTCCAGAGGCCTCCCCGGGGACTATCAAACGCGGGAAGGGAACATAA	TGGGGGGTATGCACG
A2	ATGAACAAAACCACCGGCCGCGTGCCGGTGGCGAAACGCGGGAAGGGAACATAA	GCAGGCGCGATGACC
A2	ATGCCTTAGCACCTCTTCTGACATCACCCGGTTAACGCGGGAAGGGAACATAA	AGGCGGCCAGGGCGC
A2	ATGCTACCTGATCACCCCCACGAATCACGCCCTAAACGCGGGAAGGGAACATAA	CGGAGCTCGCCCCGG
A2	ATGGTGCCGCTTGCGCGCGCCATAGCTCGGCGTAAACGCGGGAAGGGAACATAA	GTTGGGAGGTAGCTC
A2	ATGCTTCATCTCGGAGGTGGTAAAGGGACGTCGAAACGCGGGAAGGGAACATAA	GCGTGTCAGGCCGGA
A2	ATGATATATCGGGAAGAGGATTACCGCGCCACCAAACGCGGGAAGGGAACATAA	GGCTTCACATGTGAG
A2	ATGCGCAATCGACAAAATACCAAAACTTCGGGCAAACGCGGGAAGGGAACATAA	GTCCGTCACGACCGA
A2	ATGATCTAACAGAGCGACACGGAAACTAACGCCAAACGCGGGAAGGGAACATAA	TAGCGCTCGTGGTTC
O1	ATGATCCCGCGGACATCGGGGGCATAGCCCCGCAAACGCGGGAAGGGAACATAA	CAGGGGGGAGGGGGC
O2	ATGAGAAACGTCATGAAATTATTCAGAGTGATGAAACGCGGGAAGGGAACATAA	CCGGGCTAATAGGTT
O2	ATGGTCCGGGGCACATTGCAAGATATTTGTTTTAAACGCGGGAAGGGAACATAA	CTGAGGGAGGCGAAC
O2	ATGCCCACGGCCAGGACACCGGTGGCCGCGTCCAAACGCGGGAAGGGAACATAA	GATCAAGAAAGGCCG
O2	ATGTGCCAGGCGCAGGGTCCTCCGTTGCGCCCCAAACGCGGGAAGGGAACATAA	GGGATTCGACAGTC
O2	ATGACCCACACATGGTACACTGACCACACGCGCAAACGCGGGAAGGGAACATAA	TGGGGGCGCAGCGAG
O2	ATGGAGCTCCCCTTGGTGCGCTCCAGGGACCATAAACGCGGGAAGGGAACATAA	GGAACGCGTCTCCTG
O1	ATGCAACCCCGTGCCGGCCCGCCGATCCGCTCCAAACGCGGGAAGGGAACATAA	CGGCCCGGCCGCGGA
O1	ATGCCCCGCGGGTATCACCGGCCGACGTCCCGCAAACGCGGGAAGGGAACATAA	GATGGCTAGCCATGG
A2	ATGGCGCGTAATCAGAGGTGAAACTATTAAAGCAAACGCGGGAAGGGAACATAA	CTTAACTTCCTTGCA
A2	ATGCGATATTAATCGAATTCGACGCCGCCCACCAAACGCGGGAAGGGAACATAA	CGACTGCGCGCCGCC
A2	ATGCTTTATGAGACAAACCAGACTCTGAGCTCGAAACGCGGGAAGGGAACATAA	GGGGGTTGGGGTCGG
A2	ATGCAGAAAAACAGAAAAACCCCACAGTGACCTAAACGCGGGAAGGGAACATAA	GGCAGTTGCACGCCG
A2	ATGAGGGTCCCCGCGTAGAGCTGCGCGCCCTCGAAACGCGGGAAGGGAACATAA	GATGCGGGGCTGGTG
A2	ATGAGAACAGAGGTACCAACACACTCGCCGAACAAACGCGGGAAGGGAACATAA	GGGATAACTGTCGGA
A2	ATGTCTTGACGTGTGAGAGAGCGCGTGAAGGATAACGCGGGAAGGGAACATAA	CAAGTGAGGCCGAGT
A2	ATGGCGGCGGTTGTCGCCCCGTAGAGCGTAATAAAAGCGGGAAGGGAACATAA	CGAGTAGTGGCACTC
A2	ATGATTGTCAAGCAAACAACAAGACCCACGGTCAAACGCGGGAAGGGAACATAA	GAAGACGATCGGCT
A2	ATGATGGGTCACCCCTGTCCGGCAGTTCGCTTCAAACGCGGGAAGGGAACATAA	GGTCGTCGACCCTGC
A2	ATGGCGTTGCTGAAGCGGTGGGCGGACCGCGGCAAACGCGGGAAGGGAACATAA	CTAAGCGCGAAACGG
A2	ATGTCACAGGTCTCTCGCGCCAATTCCGCCATGAAACGCGGGAAGGGAACATAA	CATACCGACCGACAT
A2	ATGTTTTATAGTGGAAAAGCCATCGCTGGCTGCAAACGCGGGAAGGGAACATAA	ACGGAGGCGTTCAGT
A2	ATGCCCAAAACCGTCCGCCCACCGCCCGCCGCGAAACGCGGGAAGGGAACATAA	CGCCGGTGCCGCCGC
A2	ATGTGAATATAGAGAGGCAAACAACAGCGACGTAAACGCGGGAAGGGAACATAA	TACGGATCGCAAGC
A2	ATGGGTGAGTACAAATGAGGAGCAGGGGCCTCCAAACGCGGGAAGGGAACATAA	CCCAGCGGCAGCGTG
O2	ATGAAGCAGCTTACTACGGACCAATATGCGACTAAACGCGGGAAGGGAACATAA	CCGAAGAGAGGACGA
O2	ATGGCTGGCGGTTACGCGAAAATCTAACGACGCAAACGCGGGAAGGAACAAA	AAGCTGCTGGCTGGA
O2	ATGGGCGCAGCTCTCCGACGCTACTATGATCAGAAACGCGGGAAGGGAACATAA	GAAGAGTGGACCGAT
O2	ATGCGCCCAGGAAGCTTGGGCTGGTCTTAGGCGAAACGCGGGAAGGGAACATAA	CGGGACTGGCCTCGG
O1	ATGCGACCCCGCCCGCGCGTCCCCCGGCCGTCTAAACGCGGGAAGGGAACATAA	CGGTTGACACGTCCC
A2	ATGCGGGTCCAGCCCACCCGCGCGCACGGATGCAAACGCGGGAAGGGAACATAA	TGTGGGGGCAACGGG
A2	ATGTCTTCTTCGGGACGAAGGGCGCCGCCCGCGAAACGCGGGAAGGGAACATAA	GCCGCCGGGGGTGTT
A2	ATGTGGTCCGCGCCGATCACAATACCAAACCACAAACGCGGGAAGGGAACCTAA	CAGGGCCGCGACGAA
A2	ATGATAGCACACAGCCACCAAAGAACGGACGACAAACGCGGGAAGGGAACATAA	GGGGAGCTGCGCCT
A2	ATGTGATTTTACCGTGGACTGAGCCCTATGCGGAAACGCGGGAAGGGAACATAA	GCAAGCGGACCGGAC
A2	ATGGGTAAGATTGGAAGACGGCTACCCGGTCTCAAACGCGGGAAGGGAACATAA	GTATGCCACTCAAA
A2	ATGCCGCGTCGCCGTACTTCCAACGCGAAATACAAACGCGGGAAGGGAACATAA	TCGCGGAGACAGAGG
A2	ATGGTCAATTCGATCTCAAAAACACGGAGCTGCAAACGCGGGAAGGGAACATAA	TCCTAAGGGAGGTGA
A2	ATGGTTGGCCGTTCAGATTCAAAGTCTAGTGTGAAACGCGGGAAGGGAACATAA	CAACGGCCCCGGTAG
A2	ATGTGCCATTGCCAGGGGACCAGGGATCTCATGAAACGCGGGAAGGGAACATAA	CGGTTGCTGCGGCAA
A2	ATGGGGCGGCACTCTCGCTAAGCCTGCATTCGTAAACGCGGGAAGGGAACATAA	CGGCACTTTGGCGCC
O2	ATGAAATAAATCGACACTCGGCTAAAGGAACATAAACGCGGGAAGGGAACATAA	GGTCCTGAACGCATC
O2	ATGGCCCTGTAGCATCGGAACTCTATGGTTCTCAAACGCGGGAAGGGAACATA	AGGACGGGCACACAT
O1	ATGCCGTGCCGCACCCTGCCTTCCGGTCCCCGCAAACGCGGGAAGGGAACATAA	TATTTAAATCCGTTA
O1	ATGAGCCCTCCGGCTCAGTGCGAGACTGAACTTAAACGCGGGAAGGGAACATAA	GTCGGGGGCCGCCTG
O1	ATGGCAGCATATGAAATATGCCTCGCACGCTCGAAACGCGGGAAGGGAACATAA	GCCCTGTCTCCCGTG
O1	ATGGCGCTGAACCGAGCGTCGCCCTGACTTATAAACGCGGGAAGGGAACATAA	GCAGAACGGACGCGT
A2	ATGTGTAAGCCTCGGCTGACGACTCCTTTCCCCAAACGCGGGAAGGGAACATAA	CCGCGCGCGACGAC
A2	ATGAGTTCGCCTTGATTCAAGAAGGGTGTCAACAAACGCGGGAAGGGAACATAA	AGTGGCGCGGAACAC
A2	ATGCTAGAACGCTACCAAACCCCGCCGCCATCGAAACGCGGGAAGGGAACATAA	GAGAGTCGGCGCGTG
A2	ATGACAAAAGGTGGAACCGGGGCACCCCCCGCCAAACGCGGGAAGGGAACATAA	TCGAGCCGACACCGC
A2	ATGGTGGGCTGCATCTCTATAAGGCTTCTGGCGAAACGCGGGAAGGGAACATAA	GGGAGCATTAACGCA
A2	ATGATTGCGCGTTGTGGGTTGAGGAGGGACACGAAACGCGGGAAGGGAACATAA	GAAGCGGTCACCGG
A2	ATGGTGGATAATACGTTTTTCACCGCCCACCGCAAACGCGGGAAGGGAACATAA	ATTCCAATCTATAAG
A2	ATGCAAACACCGTTACTCGAGAACGATCCGGGCAAACGCGGGAAGGGAACATAA	CAGAACGTGCGTAAC
A2	ATGCTCACCCGGCAGCACGCCTCCCCTTCCTTGAAACGCGGGAAGGGAACATAA	TGCTGCCTCTGGGGA
A2	ATGTGGAATTGGTAGACGCGCGCCTTCGCCCGTAAACGCGGGAAGGGAACATAA	CGATTTAGACGCGGC
A2	ATGTAATTATGGCTGTCTGCTCAAACCGCCGAACGCGGGAAGGGAACATAA	GAGTACGGCGCACTC
O2	ATGGCTATGGCCGCGTAGATGCTCCTGAGGCTAAACGCGGGAAGGAACATAA	TACCGCTGGATGAGA
O2	ATGGCGCGCCCTAGTTAGTGACCGTATTCGGTAAACGCGGGAAGGGAACATAA	GCCGGAGCCAGTGGG
O2	ATGCACTGTCAGGGACTGGGTTACGTCAGCACCAAACGCGGGAAGGGAACATAA	GACTCACTTTGCAGG
O2	ATGTCACTGGTTCGGTTGACGCGCGCCGTTCCTAAACGCGGGAAGGGAACATAA	CTGGCCGGGGACGAC
O2	ATGCAGAATCACACCCAAGTCATCGACGGTTACAAACGCGGGAAGGGAACATAA	GATTTTGTACCGGA
O2	ATGCCCGCGATCCCGCGCGTCCCTACCGCGGGCAAACGCGGGAAGGGAACATAA	GGCGACTGCGACGG
O2	ATGTAAGCAGCACATATAGCGAGAGGCGGTTCGCAAACGCGGGAAGGGAACATAA	GCCTTCGTTCAACGG
O2	ATGCACAGACACGCCCCAGCTGGATGGCTCTGGAAACGCGGGAAGGGAACATAA	TCTTTCTCTAGTTTC
O2	ATGTCGGCCTCGCGCGCACTGCAGCGCGACCAAAAACGCGGGAAGGGAACATAA	ACATCGTCGCGCGCA
O2	ATGGTGTCACACACGCTCTCCGACACCCCGACCAAACGCGGGAAGGGAACATAA	ACGCCGGAGAGTCGG
O1	ATGGGCCCTGCGCGCGGTCCCGCAGCGGCGGCTAAACGCGGGAAGGGAACATAA	CGTTACCATCCTGTT
O1	ATGCCCTCGGCGCGCCCGCTCTTTTGTTTACACAAACGCGGGAAGGGAACATAA	ATCTCGGGTCCAATT
O1	ATGTCCGCAGCCCTACCCCGTCGGGCGTGACCTAAACGCGGGAAGGGAACATAA	CTCGGTGAATGTCGC
A2	ATGCCGGCCCGCTGTCGGTAAATAGTCCTTGCGAAACGCGGGAAGGGAACATAA	ACTTGGAGGCAGTTA
O1	ATGCGGTCGTCTTAGGCGCCCTTGCTAATCAGTAAACGCGGGAAGGAACATA	CGTTTGTTTGAGCCG
O1	ATGGCCCCACAGTAGCCGGTTGCCGCGCCGTGTAAACGCGGGAAGGGAACATAA	CGGGACGATGCCCGT
O1	ATGTCCCCCGCCTCGACACCCGGCTGGTCGACTAAACGCGGGAAGGGAACATAA	CCGTCTGGGTTCCAC
O2	ATGACAAAATTCCACGCTCGCGCGATTCTGCGTAAACGCGGGAAGGGAACATAA	GGTCCGGCCCGCGTC
A2	ATGAGTATAGGAAGAGAGTGCAACTGTGTCCTCAAACGCGGGAAGGGAACATAA	CCGGGCCGCAGCGAG
A2	ATGTTCAATAACGGCGCGTTAACACTCAGGCATAAACGCGGGAAGGGAACATAA	AGCCTTGCTTAGTGG
A2	ATGATTTGCTTCAAATACAACGCTCGTTTCGGCAAACGCGGGAAGGGAACATAA	GCCGGAATCGTTAAG
A2	ATGGCTGGTAACTCAAGTTGGGCGGGGACCGCGAAACGCGGGAAGGGAACATAA	GATCCGGGGTCCGGA
A2	ATGAACAAAACAAAAAAACGCCACACATTTCTGAAACGCGGGAAGGGAACATAA	GCGCCCTGGGAAGGA
A2	ATGATTCATCACGGCTTTGTAACCCACAACTAAAAACGCGGGAAGGGAACATAA	TAGTACCTTTACTTC
A2	ATGTGACATGGAATGCGTAACAAGGGCCTGGAAACGCGGGAAGGGAACATAA	CAGCCCGGCAACGCG
O1	ATGCAGAAGGCCATCGGCCAGCATGCGCGTACGAAACGCGGGAAGGGAACATAA	GGTTCTGCCAGGGGG
O1	ATGGCGGGGTCGGTGAACCCTCGGGCGCGCCGCAAACGCGGGAAGGGAACATAA	GGCGCCCTCGGTCGA
O1	ATGCGGCCCGGATGGCCTTATCCTCGGGCCCACAAACGCGGGAAGGGAACATAA	GGGCATCCTGTCTCT
O1	ATGGCTCCCCCGCTGCGGGCGGCAGCCACAGCTAAACGCGGGAAGGGAACATAA	TAAACAACTGCCTAG
O1	ATGAGGCGACTCACGCACGGCCAGCGTCTCTCTAAACGCGGGAAGGGAACATAA	GGGGTCGGCCAGCGG
O1	ATGACCGGGTACTATGGCCGCCTCAGGCGTCTTAAACGCGGGAAGGGAACATAA	GGAGGGACGTGGAGGC
O1	ATGGCCGCAATCGCGACTCGCTCGGGTCCTACTAAACGCGGGAAGGGAACATAA	GGCCGCTTGGCGCTC
O1	ATGTGCGGGGCCGGACATGTCCCCGGGCGCGTCAAACGCGGGAAGGGAACATAA	CGGCCCGCACT
O2	ATGAGCTCGCCAACACCAGCCCTCCGGGCATACAAACGCGGGAAGGGAACATAA	ATGAGCGCGCCCCAC
O2	ATGCCGCCCGGTGACTCGCGCTCAGCGGCGTAGAAACGCGGGAAGGGAACATAA	CAGCGGCAGTTGCCG
O2	ATGGGACATATCGTTTGACGCTTGGTACGCGTAAACGCGGGAAGGGAACATAA	AAGCATACGAGGTG
O2	ATGCGGCGCACCCCAGGCCCGAAGGTCAACCCTAAACGCGGGAAGGGAACATAA	GCATTCGCACGTCGG
O2	ATGTTTCCGTCGGGGTACCCGTTCGGCTCCCTCAAACGCGGGAAGGGAACATAA	GACCGGTTCGAACG
O1	ATGCCCCGCGGCGGTCCCTCCCGGTGTGGCCCTAAACGCGGGAAGGGAACATAA	GGCGGAGGTCCTAGC
O1	ATGCCACCGGCCCCTGGCCCTATACCTGGGGCCAAACGCGGGAAGGGAACATAA	GAAGGGGCGGAGCGC
O1	ATGGATACGCCCAGCGTTTGGGTGCGTCCGCGGAAACGCGGGAAGGGAACATAA	GGGTAACTTGGTCCC
O1	ATGCCGCCCCTGGGGTTTGTCTGTGCTACCGCGAAACGCGGGAAGGGAACATAA	GTGGGCTCTATCTTT
A2	ATGGCGCGTTATGGATGGATATACTAGGCCCCTAAACGCGGGAAGGGAACATAA	GAGTGGACAGTTGGT
A2	ATGAAAAAGGACACAGAGCGTCACTCGGCGCGGCAACGCGGGAAGGGAACATAA	GAGAGGAACGGGGCC
A2	ATGGAACGTGCGGCCACTATCGCCGCGGGCCACAAACGCGGGAAGGGAACATAA	ACGAAGAGCGCAGGC
A2	ATGCGTCTCGTGCCCGGCTGACATGAGGCATCGAAACGCGGGAAGGGAACATAA	CGATGACCGATTGTC
A2	ATGCATTACAACAGACATACCACACGCTTTGGGAAACGCGGGAAGGGAACATAA	AGTACGCTGCGCGGG
A2	ATGGGTGTTGGCGCATGTTGTCGCGACACCGACAAACGCGGGAAGGGAACATAA	CGAGTCTCG
A2	ATGGGGGCCCACCGGCGGCATGCGGACGGCAAACGCGGGAAGGGAACATAA	GAGCATCTAGCCGCC
A2	ATGCGGCTGGGCGCGTGACTCCCGCTCTCCCAGAAACGCGGGAAGGGAACATAA	TCGTTAGGAGCGGT
A2	ATGCTACATAAGTGACCAGGTGAATCGACCCAAAAACGCGGGAAGGGAACATAA	TCTTGTGATTTTTGA
O1	ATGGGTACACTCTGACGAAGCAGGTACCCTTGAAACGCGGGAGGGAACATA	GGGTTTGGGAGACCG
O1	ATGCAGACCGGCGGGCGTCGCTGCCTTCCACGCAAACGCGGGAAGGGAACATAA	AGACGCGCAGCCACA
O2	ATGTGCGGGTACTCCTAGGCCCTAGCGGAAACGCGGGAAGGGAACATAA	GTGGCGGCGATGCTC
O2	ATGTACGACACGTCGCTGTGACACGCCGCTATCAAACGCGGGAAGGGAACAAA	TGAGGCGGAGGGGCA
O2	ATGCAGGGCCCTCAGAGGGCGGGGCCTTATCTCAAACGCGGGAAGGGAACATAA	CGAGCCGCATGGGGT
O1	ATGCATGGGTCTGCCTCCGTCAGACTTCCCGGCAAACGCGGGAAGGGAACATAA	TGATTAAATCGTCAT
O1	ATGCCCCAGAACTGGCCAGCGATGGTCGCCTCGAAACGCGGGAAGGGAACATAA	GGACCATTCGCCCGC
O1	ATGTCCGCCACTAGGGTCAACCCCCTAAGTCTTAAACGCGGGAAGGGAACATAA	CACATCACTGGAATC
O1	ATGCCGGGTCTCCCCGTGTTCTCGCGGGACCCCAAACGCGGGAAGGGAACATAA	TGTGCGTGGGGTCCT
A2	ATGGTCCGGCGGACTAAACCAGAGCTGCCCCGCAAACGCGGGAAGGGAACATAA	GGAGACTTCTTTTTG
A2	ATGAGGGGGGTTCTATAAAGAACCACGATGCCAAACGCGGGAAGGGAACATAA	ACGCCCGAGACGTC
A2	ATGCAAACCAGGTTCAAGGCCAAGAGCCGGCACAAACGCGGGAAGGGAACATAA	CTCACGCCGAGACGG
A2	ATGTGTATGGTGCGGCGGCCGGTGTCAGACGCGAAACGCGGGAAGGGAACATAA	TTTTAGGCCTTATGA
A2	ATGGCATATTGCATTCACATAACCCGTCCCTTCAAACGCGGGAAGGGAACATAA	GAACAGACTTGGCGG
A2	ATGCCGTCGCCGCCCGGGCGCACCACGCTTGTCAAACGCGGGAAGGGAACATAA	TCATCCGACGGCAAT
A2	ATGTGGGGGAGCCGCTCCGTGACTCCGTCGCTCAAACGCGGGAAGGGAACCTAA	GACCGAGATGGGAGT
A2	ATGATACAACATCCAAAACTCACCACTGAACCGAAACGCGGGAAGGGAACATAA	GGACCTTCGGAGGTT
A2	ATGCGGGCGGTACGAAAGAAAATACCTGGATCCAAACGCGGGAAGGGAACATAA	CCGGGGACCGCTGAG
A2	ATGCGCAAAAAACAGACCCTGCCCCAGCCGGTCAAACGCGGGAAGGGAACATAA	ATAGCGGCACGCGGT
A2	ATGAGGATCAATGAAACAGACACCAAGTGACTCAAACGCGGGAAGGGAACATAA	CCGGCCTGAGGGAGC
A2	ATGCCACAAAGCACGAGCTGAAATCGGCTCAGCAAACGCGGGAAGGGAACATAA	CAGGTCCAACTGATA
A2	ATGCATCAAATGTAGACAGGCGCCCGCGAGGGCAAACGCGGAAGGGAACATAA	CCGGGGAGGAGGGGC
A2	ATGATGCGCGCTGTTTAAGCGGAACGAGACCTTAAACGCGGGAAGGGAACATAA	CCTCAGGGGGCAGTC
O1	ATGGAGGTCGCTTCACTGCGTCAACTGTCCTGAAACGCGGGAAGGGAACATAA	TTGGTGGTAGTCCGA
O1	ATGAATCCCCCGTTGCCGCGCCAGGCCGTCCACAAACGCGGGAAGGGAACATAA	GACGCCGCACTACCG
O2	ATGCCGCGCCCTCCGCTCGGCTCGGGTTCGTCCAAACGCGGGAAGGGAACATAA	CTCGTCGGTGCCCGC
O2	ATGCACCGCCAAACCGGGTTCGACAACACATGCAAACGCGGGAAGGGAACATAA	TGGCGAGGGGTGGAG
O2	ATGCGCTGCTCGGTCCGGCTCCGGTGCTCCGAGAAACGCGGGAAGGGAACATAA	GGACGACTGCTTGCT
O2	ATGTTCCCGTCGACCCCCCTACCCTGTAAGTCTAAACGCGGGAAGGGAACATAA	GTAGGGAAGGCGCTG
O2	ATGCTGTCATAGCACAAATTTCACGTACACGGAAACGCGGGAAGGGAACATAA	ACGATGGCGTTTAGC
O2	ATGCATCCCGGTGCGCCGTCTCAGCGCATCTTCAAACGCGGGAAGGGAACATAA	AACGGGGGTGTCGAT
O1	ATGCCACCTGGCCCACTCACACGCCGCGCGTCTAAACGCGGGAAGGGAACATAA	GGGTAAGTGAGCCAT
O1	ATGGGTCCGCGGTAGGTTGAATCCCTCCCCAGGAAACGCGGGAAGGGAACATAA	GTCGGTGTGCGTTTA
O1	ATGTGCAATCTCGCATCAAACAGAATCTACTGAAACGCGGGAAGGGAACATAA	GTTGGGTTGGTTGTG
O1	ATGGCGAGTTCCTAGGCGTTGCGACGTCCTCGTAAACGCGGGAAGGGAACATAA	GGGGGGCGGAGCCCG
O1	ATGGGCGTTGTCCTGCGGCGGCGTTCCCCGCGTAAACGCGGGAAGGGAACATAA	GATGGAAATCGGCTG
O2	ATGTGCGGGGGGGACAAGTAGTCCAGCTATAGTAAACGCGGGAAGGGAACATAA	GGTAAGTGCCGGCAC
O2	ATGTCAAGACCCCCGGCCCCCGTAGGTCACCACAAACGCGGGAAGGGAACATAA	TTGGGGCCGTGGACA
O2	ATGCAAAGCAACGCCGTTTTAAGTAGTTCCCGGAAACGCGGGAAGGGAACATAA	ACTGATGCTACAGGG
O2	ATGTATATCACGGTCAGAGACCTTAATCTATTAAAACGCGGGAAGGGAACCTAA	TTGGTCCACGTATGC
A2	ATGCCCCATGCAAGCGTCCCGAAGCCCACCAGGAAACGCGGGAAGGGAACATAA	CCAGGCGCCCGTCGC
A2	ATGGAGGATCATAGCGGGCAGACACAGGTGCCCAAACGCGGGAAGGGAACATAA	GCTTGTTCACGCGGG
A2	ATGGCCGTTTCGGGCGGTGGCCGCGCGCCCGGCAAACGCGGGAAGGGAACATAA	GCAAGGGGGCCGTGG
A2	ATGCCGGGTGGGCCCCTAGCCCGGCCAAGGCGTAAACGCGGGAAGGGAACATAA	CGGATGTCGGCTCCA
A2	ATGTGTTAACCGGACAACCACCTCAGCCGGGTAAACGCGGGAAGGGAACATAA	GACCGGGCACAACTG
A2	ATGACCGATAGCCACATCTCAACACCTTCACCCAAACGCGGGAAGGGAACATAA	AAGCGGCCACAGCGC
A2	ATGACTTATGAGACATGCCCGAATACAGCGTAAAACGCGGAAGGGAACATAA	CAAACATCCCCCTGG
A2	ATGCAAACAGGGCACGCTCCTCGCCGGAGGACGAAACGCGGGAAGGGAACATAA	CGGGGCGGAGAGACC
A2	ATGGGGGATCATTGCAGGAACCGAACTCATACCAAACGCGGGAAGGGAACATAA	TCGCGTGTCGGAGGC
A2	ATGAGATATGTCGGTGGAATTTGTCGCCTGCCGAAACGCGGGAAGGGAACATAA	AACGGGGGCACCAAG
A2	ATGATACAGGGGCTCCAATCGAGACCTCTCCATAAACGCGGGAAGGGAACATAA	GAGGCCCAACTGCGG
O1	ATGGGGTTCCGTATCCTCGTGACAGTCTTTTCGAAACGCGGGAAGGGAACATAA	GGAGTCCTCTGGTAG
O1	ATGGAGGTCACCTTAGCCGCACCGGCGTCGACCAAACGCGGGAAGGGAACATAA	GAGCTGCGAGTGTCC
O1	ATGCAGCGCTTCCAGGTGCAAGTCCCCACGATCAAACGCGGGAAGGGAACATAA	GATGTGAGGGGGTGG
O1	ATGCGCTCCACGGACTGTCGACCGTGGGCGGACAAACGCGGGAAGGGAACATAA	GGCGACTACCTGCCG
O1	ATGATGGTGACGCCTGCTCACTGTGCCTTCCCTAAACGCGGGAAGGGAACATAA	CACGGCGGTGCCACG
O2	ATGGTGCGCCGTTGTGTGGGTCCTTAGCTTTTGAACGCGGGAAGGGAACATAA	GGTCGCACACAG
O1	ATGAGGCCCGTCGGGTGCTCGCCCCTCCCTTGTAAACGCGGGAAGGGAACATAA	GGTGCGATCGAACA
O2	ATGGCCCCCCGGTGCTCCGGTTGCCCGCGTACTAAACGCGGGAAGGGAACATAA	CCACCGGTGCCCGCC
O2	ATGAAACTGGCACCCCCCCGGGGGATCGCGACGAAACGCGGGAAGGGAACATAA	ATCTCCGGGGGAGCT
O2	ATGCCCAGAAAACGGGGCCAAGCACTTCCCCCCAAACGCGGGAAGGGAACATAA	GGGCTTGGGAACGGG
O2	ATGTCAGTATTCGGTTATCCTCACGTTTGAAACGCGGGAAGGGAACATAA	TGGTTTTCTGAGCAC
O2	ATGCGCGCGCTACCGGTCCGGAGGCTCTCTGTCAAACGCGGGAAGGGAACATAA	GGACAGGACACGTGT
O2	ATGCCAACACCTCACTCCCGTAGTGCCACGTTCAAACGCGGGAAGGGAACATAA	GGGGGCCCTGACGGT
O2	ATGTTTCCCCGTCGCCTGGCGCCGGCGGCCAACAAACGCGGGAAGGGAACATAA	GTCAGTGGACGCGAC
O2	ATGAAAGTAAAGTGTGGGCATGATCAGATTCTGAAACGCGGGAAGGGAACATAA	GACGGAGCGACCGCA
O2	ATGTGTTCAGCCATGGGCAGATGCCGTCGGGCGAAACGCGGGAAGGGAACATAA	TCTGAAGGACCCCG
O2	ATGGCTCCGGCCCCTGGGCAACTCGTCGCACACAAACGCGGGAAGGGAACATAA	TTTGTCCGTTATATC
O2	ATGCGAACCCCGGTCCCCGGTAGCACGCTCCGGAAACGCGGGAAGGGAACATAA	TCGGACGACCCCGCG
O2	ATGATAACAGACAACCACCTTTGGGACAAGGTTAAACGCGGGAAGGGAACATAA	CGGACGTAGGTGATC
O2	ATGCTCGCGAGCGCAAGATCCAGGTCATGCCCCAAACGCGGGAAGGGAACATAA	CGCAGCCCGTCTCGG
A2	ATGAAAACCCGTCACCCCCAACACGCCAGGCGTAAACGCGGGAAGGGAACATAA	AGGCGTGAGTCGATC
A2	ATGGTTGACGAGTTTTTTAGCCGAGGAAAACCGAAACGCGGGAAGGGAACATAA	TCGTCACTTTCCAGT
A2	ATGATAATCCGGCTTATAGAACCGCAGGGGATGAAACGCGGGAAGGGAACATAA	AGGCACCTCGGGGAG
A2	ATGGGTGGGACTCGGGTCGGCCACTGCACCGGTAAACGCGGGAAGGGAACATAA	CAAGCGGCCACGCAG
A2	ATGGCTCGTCTCCTTTTCCTCGATCGCGCTACCAAACGCGGGAAGGGAACATAA	GGGTGATGCCGCGAA
A2	ATGTAAGCTTTCGCGGGGTTCACCCCGCCGTCCAAACGCGGGAAGGGAACATAA	ACACTCCTGGTGGGT
A2	ATGATTTTATCGGCCACTACTACCCACGTGGCCAAACGCGGGAAGGGAACATAA	GTGTCTCGCTTGCGA
A2	ATGGGCTATTTTAGCAGTCCGTCCCGCACCACCAAACGCGGGAAGGGAACATAA	GCCATACCACCTAAA
O1	ATGCGCGTGCACCGCTGGTCACGTACTGCTCCTAAACGCGGGAAGGGAACATAA	CGTTCCCGCTGGGGT
O1	ATGTCGGGGGGACTCCCGGACGGCCCCGATCCCAAACGCGGGAAGGGAACATAA	GTCTGAACTCGTGAT
O1	ATGCTGCGCCGGTGACCTGCCCACACTGATTATAAACGCGGGAAGGGAACATAA	GATAGGACGGACCCT
O1	ATGAACAGGCCTGCCCCGTGCCCCATCGCATTTAAACGCGGGAAGGGAACATAA	GCTGTCCCTAGCTCT
O1	ATGCCCACCGGCCGGCCGCGGCCTTGTCCCCGTAAACGCGGGAAGGGAACATAA	GCGCGCCGGGGGGCC
O2	ATGTCCGCGCAATCCTTACGAAGCTTCCGGACGAAACGCGGGAAGGGAACATAA	GTCGCAGCGCGCACT
O2	ATGCCGGCAGGTCGAAATTTCAGTCTGGCTGCTAAACGCGGGAAGGGAACATAA	ATTACTGAACAAAGG
O1	ATGTGCTGGGTTGAGGACCCTCGGCGGCGGACCAAACGCGGGAAGGGAACATAA	GCCGCGGGGGTCGTG
O1	ATGGGGTGGCCACCCCTTTGGTGACCTGGTCATAAACGCGGGAAGGGAACATAA	CAAATGGCTCACTCG
A2	ATGCGCGTTGCTGGGCGAGATACGACGGCCTTGAAACGCGGGAAGGGAACATAA	GGGTCCCTACTGTGC
A2	ATGGCCACCGCGCAAACAACAAAGAGCACTGCGAAACGCGGGAAGGGAACATAA	ACCCCGAAAGGT
A2	ATGACATAAGCCAGGAAAAACGAGCACAACTAAAAACGCGGGAAGGGAACATAA	TGTAGCATCGTGCGC
A2	ATGGGGTGGGACCGGGGGCAGGGCGCGCGCGGTAAACGCGGGAAGGGAACATAA	ACAGGACCAGGTCGCG
A2	ATGATAAACACGACGCACGCATCCGTTACGCGCAAACGCGGGAAGGGAACATAA	CACCCGCGGGCCAG
A2	ATGGCTAAGCGGCACACCGCGAAGCCGTCGCCCAAACGCGGGAAGGGAACATAA	CGGGCACCGGGATCC
A2	ATGTGATATTAGCAACCAAACCCTCACCAGTGCAAACGCGGGAAGGGAACATAA	CGTCGGGCGCTGATC
A2	ATGACGCACGGACTCCGCAGCGACAAGGGAGACAAACGCGGGAAGGGAACATAA	CACTTCCGCACGCCG
A2	ATGTACAATATAAGCGCAAGAGGCGCCCCTACTAAACGCGGGAAGGGAACATAA	GTAACATAGAGACGG
A2	ATGATGAACGCCGGTCCACAGCGCGGCAATGGCAAACGCGGGAAGGGAACATAA	GGTGCGCCGCCGGAG
A2	ATGTCCCTACTCCGGTCTGCGACCCCGGAAAGTAAACGCGGGAAGGGAACATAA	CGGACGAGCCTGTTC
A2	ATGTTTTATACAAGTTTTCTAGTGCCCCCGCCCAAACGCGGGAAGGGAACATAA	GGTGGCCGGCCAGTC
O1	ATGCGTGGCGCGGCCATGCACGGAACCTCCTGCAAACGCGGGAAGGGAACATAA	GAGGTCCCGGTGATA
O1	ATGCAAACAGCGGGCGCCGGGAGGCCTGGCGTGAAACGCGGGAAGGGAACATAA	GGGGCGGGGGTGCGC
O2	ATGACGCTGCTTGCGCCCCCGTTCGCCTTGCCCAAACGCGGGAAGGGAACATAA	GCGCCATCGACGGGC
O2	ATGCGCGCTCTCCGAAATCCGGCGGTGGTCCGCAAACGCGGGAAGGGAACATAA	AGGACGGCATAATAG
O2	ATGCGCGCACCCGCCGCCCCAGTCCCACATGGGAAACGCGGGAAGGGAACATAA	GGGCCTGCAGGCCAT
O2	ATGGAACATTGACAGTCCGTAAGGCTCTTTACTAAACGCGGGAAGGGAACATAA	GACGCGCCTCCGCG
O2	ATGACTCCGGACTGCCACGTGGCACAGCCTATGAAACGCGGGAAGGGAACATAA	GTATCGACGAGACAC
O2	ATGAAATGGTAGCGGATTGGACGCGCGTCGAGTAAACGCGGGAAGGGAACATAA	GGGACAGGGATAGGA
O2	ATGTCCGCCGCAGCAGCCCTGGCACATGGGCCGAAACGCGGGAAGGGAACATAA	TTGGGCCGGGGCACG
O2	ATGGGGATCTGGGCTCCGGCTCGCTTCCCCGCTAAACGCGGGAAGGGAACATAA	GACAGTAGCGTGCGA
O2	ATGCCACCGACCTGTACCGCGACGTGGCGAATCAAACGCGGGAAGGGAACATAA	GGCGAGGACTAGGCA
A2	ATGAGATTGAACTCCGGGCTAACGCCCGCCATCAAACGCGGGAAGGGAACATAA	CGTGAACCACGGACT
A2	ATGTCATAGATCGCTGGCAACAAGGAACGGGCTAAACGCGGGAAGGGAACATAA	GAGAACGGGCCTTTG
A2	ATGTTACATTTCTTCTCGCTCGATCGCCGCGCGAAACGCGGGAAGGGAACATAA	TCACAGTCGGCTCAT
A2	ATGGCGGTGGCGCCGTCAAAATAATCTACAAGTAAACGCGGGAAGGGAACATAA	GAAGAGGAGGTGTCC
A2	ATGTCACATATCAGCCGAACACCCCGGCCCCGCAAACGCGGGAAGGGAACATAA	AGGGTTCTCGCACAG
A2	ATGTTTCAGATGCACGCCAGCAGCCACCCCGGCAAACGCGGGAAGGGAACATAA	CAAAACCTACGCCG
A2	ATGATGTACGCACGATCGCATACACTCGATGCTAAACGCGGGAAGGGAACATAA	ATCGGGGCCGAAACG
A2	ATGAGGCACGAATAGCAGGACTCCGCACGTAAACGCGGGAAGGGAACATAA	ACTCTAGACGCAG
A2	ATGAGCGGGGGTCCTCAGTCTCGTTACGTGGGTAAACGCGGGAAGGGAACATAA	GTCGTGGGCAGAGGC
A2	ATGGGTTGTAGTTAAAGTAGAAAGAGTTAGCAGAAACGCGGGAAGGGAACATAA	CAGGGGACGTCCCTC
A2	ATGACACATGACGCATACAGAGTCTAGGCCCGACGCGGGAAGGGAACATAA	GAACCACGGGGGAAC
A2	ATGAGAGCACTGCTAAACCCAGTCGTGCCTTGAAACGCGGGAAGGGAACATAA	GTGGGCCATCGAACC
A2	ATGCGTTTTTAGATGCTGTGTCGCCGGCGGGACAAACGCGGGAAGGGAACATAA	TGATGGGGCGAAAAC
A2	ATGTATTTGGTGTTTAGGGTTGCTCTCCCGTTCAAACGCGGGAAGGGAACATAA	CGCGCGATCACCGGT
A2	ATGCAACAACGAACCACACACACCCCCGCGGATAAACGCGGGAAGGGAACATAA	GGCCGACAACGACCC
A2	ATGGTAGAGGAAATGGCAGTATTGCACCGGCGCAAACGCGGGAAGGGAACATAA	CGTGTGGTCGAGGCC
O1	ATGTCCCGGTACCTCCATCCCCCTCGGGCCGCCAAACGCGGGAAGGGAACATAA	TCCGTCGATCCCCCT
O1	ATGACCACGGCCGCCTCGCGTCGCGTCCTCGGTAAACGCGGGAAGGGAACATAA	GTGCTTTATAGTTTC
O1	ATGGGCTCCGAGGAGCAAGCCGGCTCCCGCGAGAAACGCGGGAAGGGAACATAA	ACGTACCCCGCTCGT
O1	ATGCACGGTGAACACCGCGGTGCCCGATAGCCCAAACGCGGGAAGGGAACTAA	GGGGGCGGGGGTTGG
O1	ATGTACCGGATCCCAGACGCGCACTCGGCGCCCAAACGCGGGAAGGGAACATAA	GACAAGTACCGGGTC
O1	ATGCCGCGTCCGCCTCTGGGGGCGCATTTGACCAAACGCGGGAAGGGAACATAA	ACGGAGCAGCACCC
O1	ATGCGCGTCCACAGGCCCGGGTTTACCCTCCGCAAACGCGGGAAGGGAACATAA	GCTCGAATCGCGTTA
O1	ATGCCTACCAGTCTCAGCTGACGTTCCCGCCATAAACGCGGGAAGGGAACATAA	GGCAGATCCACAATG
A2	ATGCTCTAGACCAAACCGACCCCTCCCACAGATAAACGCGGGAAGGGAACATAA	CAAACGGAGGCGGGG
O2	ATGATCTGTGCCGGCACTTAGATCGTATACATCAACGCGGAGGGAACTAA	CCACGGGACCGCACC
O2	ATGGTCCGCGGCCGGTCGCGCTTTGCCTGCCTTAAACGCGGGAAGGGAACATAA	CGTGGGAGCCGAATG
O2	ATGAGGCGTTGCGGGGTCTGGGCCTTCGCCTGTAAACGCGGGAAGGGAACATAA	CGGGGGGCGCTCAGC
O2	ATGCGGCCTGCTTTTTGGTTACGCCCGGTTCACAAACGCGGGAAGGGAACATAA	GAGACCGGAGAGAAT
O2	ATGGCGACCGACGTGAGAGCTCGCACTCGTGCCAAACGCGGGAAGGGAACATAA	TGCTCTAGGACAGAA
O2	ATGCTGCCCGGCGCCGCGACCCCGGTCCTACACAAACGCGGGAAGGGAACATAA	CAAAGTGCTGCCCGA
O2	ATGCGTTAGTGCCTTTGGGTGACAGCATTGGGCAAACGCGGGAAGGGAACATAA	TTGTATGGGTTCATA
O2	ATGCGCGCGCAGCGGCCAGAGCTTTTGGCCAATAAACGCGGGAAGGGAACATAA	GGCACGAGACCGCGA
O2	ATGGATCTCCAGACTGGCCGGCTACGGCCGCGCAAACGCGGGAAGGGAACATAA	AGACGCTGGGATGCC
O2	ATGCTTTCACCAGGTCGCGGGTTAGCGAATCATAAACGCGGGAAGGGAACATAA	TCGCACCACCGGCCG
O2	ATGGTGACTTGAGGAGCGCGCGCCCGTCCATCTAAACGCGGGAAGGGAACATAA	GCGCGCCCGGCCGGT
O2	ATGACCGGTGGCTTCCCAGCCTAACCTCGGTGCAAACGCGGGAAGGGAACATAA	AGTTACTGACAGGTC
O2	ATGCCCCCCGCGAGACGGAGGGCATGGTGTCCCAAACGCGGGAAGGGAACATAA	GGGTAATCCTGATCG
O2	ATGGATGCCGCGTCTCATCCTGGATCAGGTAGCAAACGCGGGAAGGGAACATAA	GGAAAAAGGCTGCCC
O2	ATGCCGCTGCCCCGACTTAGCGGCCTGACCTTTAAACGCGGGAAGGGAACATAA	AGACGGGCTCGGAAA
O1	ATGCTGGAGAATACGGTGCGACCCGCGTCGGCCAAACGCGGGAAGGGAACATAA	ACCCACAGTGCGGTG
O1	ATGATGCCCGATTCCGTGTCGCAGACAAATCGGAAACGCGGGAAGGGAACATAA	TCGTCCCCTAGTGTT
O1	ATGTCGGCGCACCCAGCACCGCGCCGCACTCGCAAACGCGGGAAGGGAACATAA	GAATCGGCGGTCCGT
O1	ATGTCCGGCTGGACGGATCCCGCGCCCTCTCGCAAACGCGGGAAGGGAACATAA	GCCAGCAAGGGCTAG
O1	ATGCGCCATCACGCCTGGGGCCACTGCCGCGATAAACGCGGGAAGGGAACATAA	CCGTGGAGGGAGGGT
O1	ATGCTCGGTACGAGCGGGCTCGCGGTCCATCACAAACGCGGGAAGGGAACATAA	GTATCCGCCCTGGGT
O1	ATGCGCGGGCTCCAGCACGCCTAGCGGAGCTACAAACGCGGGAAGGGAACATAA	CTCTGTCTCACTCTC
O1	ATGCCCCGCGACAGTTCACTCGAGCCCGGGCGTAAACGCGGGAAGGGAACATAA	CCAATGCGGGGCGGC
A2	ATGAAACGGAATCTAAACCCAAAACCTTGAGGGAACGCGGGAAGGGAACATA	CGGCGCCGCGTTC
A2	ATGACAAACAAAAAACCACCCGAGGCACCGGACAAACGCGGGAAGGGAACATAA	GGGGCGCCAAGTGCG
A2	ATGAGCGTTTTCTTGCAGTCGCTAGCCCACCGCAAACGCGGGAAGGGAACATAA	ATATACTGTCTGGGT
A2	ATGCCGCCCGAGCGAGTCCGCCCACGTCCATTCAAACGCGGGAAGGGAACATAA	ACGCCGGGCGGGTTC
A2	ATGGACACCACGCGACCCCAGGAGTCGTGACTGAAACGCGGGAAGGGAACATAA	ACGATAACATGGCAC
A2	ATGTGATTTCGCGCATGGAGGCCCCTGGCGGTCAAACGCGGGAAGGGAACATAA	GTACGGGCCACAGA
A2	ATGAAACAACACAATACACAGGACTGCGGAAGTAAACGCGGGAAGGGAACATAA	CGGCGGACGTGGGGT
A2	ATGAAACAAGCACACCGCAGTACCCTGGGTGGCAAACGCGGGAAGGGAACATAA	TCAGGCCCAGCCGCG
A2	ATGCTCGTGACGGTGCCGCCAACCCAGGCACGCAAACGCGGGAAGGGAACATAA	GAGGGCTTCATCGCC
A2	ATGCACACCATAACCAACAAAACCCAATCGCTAAAACGCGGGAAGGGAACATAA	TAGGCGGCAAAAGAC
A2	ATGAATCTTGACGTCACAGAGGCCAGCGGCCTAAAACGCGGGAAGGGAACATAA	TACGGCCTAGGAGTC
A2	ATGAAATAAAACAAAAGACTGCGCTCCACTATGAAACGCGGGAAGGGAACATAA	CGCCACAAGAGCCCG
A2	ATGCCATAAAACCGCCTCCAGCCTCAAGACGAGAAACGCGGGAAGGGAACATAA	ACGGGAGCGCAGCCA
A2	ATGAACACAACCGTCACTCAGCCGGTCACCGTTAAACGCGGGAAGGGAACATAA	GGAGACCGGGGCTCC
A2	ATGTTCATTATGATACGCTAGCCAGGTTACCTTAAACGCGGGAAGGGAACATAA	TTGTGTGCTGCCCCG
A2	ATGAAGAATTAGTGGAACTGAACAGGTCAGTGGAAACGCGGGAAGGGAACATAA	GAGACCGTGATGTTT
A2	ATGTTTTTTCAAGTATTCTTCACGACCACCGATAAACGCGGGAAGGGAACATAA	GAGGGGGTCCGCACC
A2	ATGGTTTACCGCATCATTACAGCCCCCCACACTAAACGCGGGAAGGGAACATAA	ACGATCGGCCACGGC
O2	ATGCCGGGAGGCCCGGCGCATCTCGCAAAGTTCAAACGCGGGAAGGGAACATAA	GGGGTATGGGATGAA
O2	ATGTACATGCCGTAGCCGGATTACGCGCCCGTGAAACGCGGGAAGGGAACATAA	GGTGCACGCTGTCAC
O2	ATGCTCAGCGCGCCACGACGTGGTCAGGGCTTAAAACGCGGGAAGGGAACATAA	CTTGATTAGCGTTTC
O2	ATGTGTTATAATGCTGGATCGGGCTTCGGTTCTAAACGCGGGAAGGGAACATAA	GACGTACGCCGCGG
O1	ATGCCCGTGGCCATCGGCCGATAGAACTCCCTAAACGCGGGAAGGGAACATAA	GCGAGCCTCATTCTG
O1	ATGGGGCACACTCCTGGTTCGCCGGTGTTCTACAAACGCGGGAAGGGAACATAA	AACCCGCCGCCATGC
O1	ATGCATGAACATAGTTAGGTGTTATGACTGACCAAACGCGGGAAGGGAACATAA	GACGGTCCGATGGTT
O1	ATGCCCCCCCGCCTGGCGCCACGTGCCGTTATCAAACGCGGGAAGGGAACATAA	CTCGCCGGGCCACCC
O1	ATGGCCGCTCCCCAGCCGCGGGGCACTTACGACAAACGCGGGAAGGGAACATAA	GCCTGGGGTGGTCTC
O1	ATGTAGCGCCCCCGCTTCCACGCCCCTGTTGTCAAACGCGGGAAGGGAACATAA	GGGGGCAGCGGATGA
O1	ATGCCTCCCTCCCGGGGAGGCGTTTCTGCGCGGAAACGCGGGAAGGGAACATAA	GCCCGAGGGAGGGCC
O1	ATGGGTGCACTAGGCTGGGACGTGCCCCTTGGGAAACGCGGGAAGGGAACATAA	TTGGGGGCACGGTTC
A2	ATGGTTGTGGGGGATTGTGGAACGCGCCCCGCTAAACGCGGGAAGGGAACATAA	GGGGGACTTGCGGGG
A2	ATGCTGTAAGACATTAGTCCGCGTGGGCGGGCGAAACGCGGGAAGGGAACCTAA	GGCGAGTCGGAGTGG
A2	ATGTGTAGGGGCGCCGCTTAGACAGGCCGGGCGAAACGCGGGAAGGGAACATAA	GGGCGCCGCACAGGC
A2	ATGGGTCGGGGGCCATCAGGCTTCGGCCTCTGCAAACGCGGGAAGGGAACATAA	GGGATACGCTAGGTT
A2	ATGAGCACAAACTAGAGGGGACAACCTACTCGGAAACGCGGGAAGGGAACATAA	CGGGAAAACCGGTCG
A2	ATGATTGTTGTCACCTCTGCGACTGTGCACTCCAAACGCGGGAAGGGAACATAA	GAAATGAAGGCCGGG
A2	ATGCGCCCCCGCTCGCTAGCGGCCGTGCCCCACAAACGCGGGAAGGGAACATAA	GTGGCGTGTGGCAGA
A2	ATGAGTCGCCGATGAGTGGGGGCCATGGCGCGCAAACGCGGGAAGGGAACATAA	AGGCTGATGTAACGG
A2	ATGGGGGCCGATTGTGGAAGAGCGGTGAGTGCTAAACGCGGGAAGGGAACATAA	CACCCGCGGGTAGTC
A2	ATGTTCGACGTCGGAAATAACACACCGGCCCTCAAACGCGGGAAGGGAACATAA	TGGGATGTGACGCGC
A2	ATGATAAAACGCACCGCCCCGGCCACTTGAACTAAACGCGGGAAGGGAACATAA	GGCCGAGCAGTGCGT
A2	ATGGCGGAGCATTGAGGTGGAGCTCTCACCGATAAACGCGGGAAGGGAACATAA	CCGGCGGTGAGTTCG
A2	ATGGGTGGGGTCCGGGTGGCAAAATGGCATCGGAAACGCGGGAAGGGAACATAA	GGGCGACAGGCCCTC
A2	ATGTTTTAAGTACCCTTGATAGGCGGACCCGCCAAACGCGGGAAGGGAACATAA	CGGGGCGGACGGCCC
O1	ATGTCCCGTAAGTGTCATGCCGGGTCGTGGAAACGCGGGAAGGGAACATAA	GGGTTCGGAAGGTGT
O2	ATGAATGCCTCGACGCTCATCCGTCTGCCAAGCAAACGCGGGAAGGGAACATAA	AGGGGCGGACCCTCA
O2	ATGGTTTCACTCGCCGTGCACGCAGAATCACCTAAACGCGGGAAGGGAACATAA	CAAACGCGTCCGGGC
O2	ATGAATTCAGGTTTCCCGACCTCCGAGACACGCAAACGCGGGAAGGGAACATAA	CTGCCGCCTACGAGG
O2	ATGCCCCCAGGGGTGCCTGCTATCACCCAGCGGAAACGCGGGAAGGGAACATAA	GTGGAATCTCTCGGA
O2	ATGTCGCGTACGCCCCCCGCGCATCCCACGCCTAAACGCGGGAAGGGAACATAA	CGGTGTTCGCGTCCG
O2	ATGCACTCCATTTGGATTCGTTAAGCCGCGCCAAACGCGGGAAGGGAACATAA	AGGGCACCGGGCCTG
O2	ATGTCGCTCGGTCCGAGCACAACCCTTGATTACAAACGCGGGAAGGGAACATAA	GTGTTGCCGGTCAGG
O2	ATGGGATGGTGAGAGGTGCTAGGTCCCAGCGGGAACGCGGGAAGGGAACATAA	TATGGTCCTAGTTTG
O2	ATGGATAGGCCGACCACCACGCGCGCTTCGCCTAAACGCGGGAAGGGAACATAA	GACCACCGCCCCGGA
O2	ATGACGACGGCTTGCTCTCCGATGCAGTTCCTCAAACGCGGGAAGGGAACATAA	CGGGGGGCGTCCACG
O2	ATGGCTCTAGGACAGGCGCCAGGCCATCGAGATAAACGCGGGAAGGGAACATAA	AGGGCCAGGCGGGGG
O2	ATGCCCCATTTCGACGCGCCCTAATCCCGCAGAAAACGCGGGAAGGGAACATAA	TACAGGGACTAAGCC
O2	ATGCGGACGGGCCGCCGTACCTAACACATCAATAAACGCGGGAAGGGAACATAA	ACCGAGCGGACGGGT
O2	ATGATAAAACTTGCCTGGGCACGGCACCCTGTCAAACGCGGGAAGGGAACATAA	GGGATGATCAACCAG
O1	ATGGCCTCGGGTCTCCCGGATCTCGTCGACTCGAAACGCGGGAAGGGAACATAA	GGGTGAGGCCGCCGT
O1	ATGGTCCACGCCCCCTGGCGTCGCCGAGCGGCGAAACGCGGGAAGGGAACATAA	AGTAGAGAGGGGCAA
O1	ATGTTCCGCACTTGGGTCTCAGTCTCTCGCGCCAAACGCGGGAAGGGAACATAA	CTGGCGAAAGGCCGC
O1	ATGCTTGCTCAGCTCTCCGCTCCCACCCGTGTCAAACGCGGGAAGGGAACATAA	TTGAACCCGCGGATT
O1	TTGGGCGCTCGGCATGCGGCACCCCTCTCCTCCAAACGCGGGAAGGGAACATAA	GTTTCGAGGCCCTTC
O1	ATGCCGACAGCTGCGCATGACCCCGCGGCCGCCAAACGCGGGAAGGGAACATAA	CTATGAGGGAGCCGC
O1	ATGGACAATTGCAAGGAGCAGTTGCTCGCGTTCAAACGCGGGAAGGGAACATAA	AGAACCGACCACCTG
O1	ATGTCCCGGGTGGCGGTCCCCCGCGCCCGGACTAAACGCGGGAAGGGAACATAA	GGCGGATGCCGTGCC
O2	ATGTCTCGCTAAAGCTTCCGACCTTAGGCCTCGAAACGCGGGAAGGGAACATAA	TGCCGGCCAGCCGCA
O1	ATGCGTACAACGGGCGGCCAATTCCAGTATAGTAAACGCGGGAAGGGAACATAA	GGAGGACTCCGTATC
O2	ATGCCATCTCCCGTCCTGGTCGGGGGATGGCATAAACGCGGGAAGGGAACATAA	CGGGAGCGCGCGAAG
O2	ATGGCAATGAGCGTAGTGCCTGCTCTGCTAACTAAACGCGGGAAGGGAACATAA	CAATGAGAGGCGCTC
A2	ATGATTCAATTTCTACATGCCGCCCGGGCCGCTAAACGCGGGAAGGGAACATAA	CGGGTCATGTAACCG
A2	ATGGGGCAGGGCGGTGGCGCCGCACCCCGGTGCAAACGCGGGAAGGGAACATAA	CGTGGCGCCGCGGAC
A2	ATGCGTGATCGGCCCGGATGGTGAGCCGCCTTGAAACGCGGGAAGGGAACATAA	TATGCGTTTAATTCG
A2	ATGGGTGCAAGTGAGGTGACAGAATTGGAAATGAAACGCGGGAAGGGAACATAA	GTTCCGGTGGGTCGA
A2	ATGTCCAGACACATGAATGGACCTCCCGTCCCCAAACGCGGGAAGGGAACATAA	GCATGATCCGCAGCG
A2	ATGACGAGCAAGCGAATACCCTACCTGAGAGGTAAACGCGGGAAGGGAACATAA	CCGAGCCGTGAGCGG
A2	ATGGATCTGGGGCGGGCAGACGCGCGTCTAAAACGCGGGAAGGGAACATAA	AACGGAAGGGCGGGT
A2	ATGCAAAAATAGCCAATCGAATTTATCAAGAGTAAACGCGGGAAGGGAACATAA	CGGTTCCTGGCCCCA
A2	ATGTTATAACGGACTATCAAAAACAGTGTGGCCAAACGCGGGAAGGGAACATAA	GGATTCGCCATACCC
A2	ATGCCTGAACTGGGATCGGCGAGTCTGACCCGCAAACGCGGGAAGGGAACATAA	TCTAGAGTTATAATT
A2	ATGCGCAATGTTTGATTTCCATCGCACAGCCTGAAACGCGGGAAGGGAACATAA	ACCAGGGCGTGACT
A2	ATGGGGGTGACGACAGAAGTTGGATTCCAGAGGAAACGCGGGAAGGGAACATAA	AGATGGGGGCGCGAC
A2	ATGACCAAAAGCTGAAACCTGCAAGGGGCCGACAAACGCGGGAAGGGAACATAA	CGCCGCAGACGCCGC
A2	ATGATCACAACGCCGAAAGCACCACCGGTCCTCAAACGCGGGAAGGGAACATAA	GAAAGTCGTGTGTAA
O1	ATGCACCCAAAATCCCGCCACAGGACGTATGAACGCGGGAAGGGAACATAA	GTTGTTACCCAGTTA
O1	ATGCGTGCTCCCCCCTCCCGGTGGCCACACTAGAAACGCGGGAAGGGAACATAA	GGGCCCGACGGGCCT
O1	ATGCGACCGCCCCCACTCTCCACCTAGCGCCCGAAACGCGGGAAGGGAACATAA	CAGCGCGCTCGATTT
O1	ATGCACCCGGCAGCCACGGGCGCGTCGTCCGATAAACGCGGGAAGGGAACATAA	CGGGGGCGCGGGCCC
O1	ATGATCGGCAAGTCCGCCGCCCCACGTTCAACTAAACGCGGGAAGGGAACATAA	GCCGAAGTTTTCCGC
O1	ATGCCACCCTGATTCAATAGCTGTAGTTCCTCCAAACGCGGAAGGGAACATAA	TACCTTCATGTTGTC
O1	ATGATCGCCGCCAGGGGCCGCCGGTGACGATGCAAACGCGGGAAGGGAACATAA	GCCAGGGGGCGCGCG
O1	ATGCAGCAGTTCGTCCCCATGGGACCTGCGGTTAAACGCGGGAAGGGAACATAA	CTCCCATGGACTCGA
O1	ATGCGCACACACACCACAGGCCCCAGGTTACTTAAACGCGGGAAGGGAACATAA	CGGACCCGTGGGACG
O1	ATGGCTAGGCCCCACCGACCGCCGCACTGTCTTAAACGCGGGAAGGGAACATAA	GACCAAGCCGGTGCC
O2	ATGTATATGTCGCACACATTTGGCTGACGCCTCAACGCGGGAAGGGAACATAA	GCCTTCAAGGGGCGC
O2	ATGAAAAATCCTGAAAACCCAACGGAAAGCGGGAAACGCGGGAAGGGAACATAA	GGCGAGTGGGCGGCT
O1	ATGGGGCTCTTGTCTTCACCCTCGGCGCGAAGGAAACGCGGGAAGGGAACATAA	GCGGGCCCCCAGGTC
O1	ATGGCTGGATCGCGCGACTGCGGATTACCTCGCAAACGCGGGAAGGGAACATAA	GGGCGGCGTAGGGCC
O1	ATGCGCGCTCTCTCCTCTAGGGTCGGCGGCCCCAAACGCGGGAAGGGAACATAA	TTGGTTAAACCTTCT
O1	ATGCTTCGGTTCGACGGCCCGACCCGCAGCGCGAAACGCGGGAAGGGAACATAA	CAACGCCATGCGAAT
O2	ATGAAATATAGTACAACCTAGTATGGCGCCAACAAACGCGGGAAGGGAACATAA	TTGCGCGAGGACTCC
O2	ATGTCTGCTGGGACCCGCCTCTTCGGTTCCCCGAAACGCGGGAAGGGAACATAA	CGTCGCAAGACACGTC
O2	ATGAGGCCCCCAACGCCCGGTCTTTCTGCGTTCAAACGCGGGAAGGGAACATAA	GGCCGATGGGAGAGC
O2	ATGACTATACCACGCGGCGTGGGCAACTTCGTTAAACGCGGGAAGGGAACATAA	AAGACCGGGGACAAG
O2	ATGGGTCAGTACCGGCTACGCCGAGCATTTCAGAAACGCGGGAAGGGAACATAA	GGCGATCGATCAGA
O2	ATGTGGAAACCCAGCTCCGATATCAGGACCGACAAACGCGGGAAGGGAACATAA	GCCATAGTGGTACG
O2	ATGGCACCGCCGAAGGACACACTGACGTTGACGAAACGCGGGAAGGGAACATAA	GGAGCGCCTGAGGAC
O2	ATGCCAACGAAAAACGCTGTCAACGAGTGATTCAAACGCGGGAAGGGAACATAA	GTTGAAGCCGCAAGC
O2	ATGGGGCATGCCTCAGCGACGGCCTTCACAAAGAAACGCGGGAAGGGAACATAA	CCAGGTGTCATGACT
O2	ATGCTCGTACGTACACGCGCCTGAGGGGTCCGTAACGCGGGAAGGGAACATAA	CACAGGGACAGGCAA
O2	ATGGCCACGCTGCTCCACATAGTCTCGTGCCTGAAACGCGGGAAGGGAACATAA	AGCGCCGACGCCAGC
O2	ATGCCCGGTGCATCCGCCGTACCAACCCGGTAAACGCGGGAAGGGAACATAA	AGTTGGACTGGAGGG
O2	ATGAAGCGCACATAGGTTTTCTACCATGGATGAAACGCGGGAAGGGAACATAA	CGGGGATGCGTGGGC
A2	ATGCTAAACACGATCTAACAGCACCAGCACCCCAAACGCGGGAAGGGAACATAA	AGTAGGGGGGAACGG
A2	ATGGACCGAACTTGTGCAGACTCTGAAGAAGGCAAACGCGGGAAGGGAACATAA	CGGAAGTACATACGC
A2	ATGTGGGGGCGCGGTCCCTGAGCACGCGCCCAAACGCGGGAAGGGAACATAA	GGCGGGTGTCGCACG
A2	ATGCACCCCTGACTAGGATGAACGGCTTATGGGAAACGCGGGAAGGGAACATAA	TGTCTACGGTTCTAG
A2	ATGACCTCAACCATTACAAACAGACAGCACGCCAAACGCGGGAAGGGAACATAA	GATGCGAGCTGGGGA
A2	ATGCGTGGGGCGCGCGCGCCTTCGTAGAGAAACAAACGCGGGAAGGGAACATAA	GGAGTGTGCCACGCG
A2	ATGTCACATAATCGAGTACTAGTGGGGGGAGTGAAACGCGGGAAGGGAACATAA	GGACGGGGGCCAGGG
A2	ATGATACATCATTCAAAAGCACTTCAACTCCTCAAACGCGGGAAGGGAACATAA	CGTGTATCGGCGTTG
A2	ATGGGTGATACGTCCACACAGCCCCGGAGTGGTAAACGCGGGAAGGGAACATAA	TCCCCGAGGCGCCGC
A2	ATGCTTTGATAGCGTATCTGGACTGATTGCTCGAAACGCGGGAAGGGAACATAA	TACGGTAGGCTCGCG
O2	ATGTCCGGCGCCGCACCCCCTCATTAGACTGCCAAACGCGGGAAGGGAACATAA	CTAGGGCTCCCGTCC
O1	ATGCGGTAGCCTTGCCTTTTGTCAAGCGTCTGAACGCGGGAAGGGAACATAA	GAGGGCACCTTTGGC
O1	ATGCCGGTAGGCGGCGTCCCCGATGGTCTACTGAAACGCGGGAAGGGAACATAA	GCTGATCTTTCCTTT
O1	ATGTCGAGGGCCCACGACCTCCGTTGTTGGCCCAAACGCGGGAAGGGAACATAA	AACCGGGGGGAGCGC
O1	ATGGGCTCTGGGCGCGTCCGGAGCGGGATGCGGAAACGCGGGAAGGGAACATAA	GGATCCATCGCCCC
O1	ATGCTCCCACCGGCTTATCCGCACCGCACTTTCAAACGCGGGAAGGGAACATAA	CGGGTGCGGGCGGGG
O1	ATGGATCTGGCCGGGCTGTTGCCGTACAAGCGTAAACGCGGGAAGGGAACATAA	GGAGGGGGGACCGGG
O1	ATGAGTTGTTCGGTGGGCGGACAATGCGCCAAGAAACGCGGGAAGGGAACATAA	TGATGCTTAGGTCCG
O1	ATGCGCTGGTCGCGCGCCTCAGTCCAGCGAGGCAAACGCGGGAAGGGAACATAA	TAGTCCACGCTGCGA
O1	ATGGGCGCGCGGTCCTCATCCCTCGACCCTCGGAAACGCGGGAAGGGAACATAA	ACGGAGGGCCATCCC
O1	ATGAAACCCTCGGTCCGGGGCCGATGCGACCGCAAACGCGGGAAGGGAACATAA	GGCTGCGGCCTCCCA
O1	ATGCGGGGGACCGCCCCGGGCCATCATGTCACTAAACGCGGGAAGGGAACATAA	GTGTCAATGGACCGA
O1	ATGCCCCGCCTTCGTGGTACCGACAATCAGTTCAAACGCGGGAAGGGAACATAA	CGCGGGGGTGCA
O1	ATGCCCGGCGTTCGAGGCGACTGATCCCTCCCCAAACGCGGGAAGGGAACATAA	AACACAGGCAACCAT
E2	ATGGGCTCCATCGGCCAAGGGCCGCTTCTGAGAAAACGCGGGAAGGGAACATAA	CCCGTAAGCTCCAAC
O2	ATGCCCCGGCACAGGACTCTCCGCCGCGGATACAAACGCGGGAAGGGAACATAA	CCAGCACCGCGGCCG
O2	ATGGCGATGGCCACGTGAGTGTACGTTCGCCTCAAACGCGGGAAGGGAACATAA	CGACATCCGCAGTCG
O2	ATGTGCCGGGCGTGCGACTCTTGGCGGGCCCGCAAACGCGGGAAGGGAACATAA	AGTCTGGCGGACACC
O2	ATGGTCCCACCGTTCGGCGCACGACCGCCAGCCAAACGCGGGAAGGGAACATAA	GCGGCGCGCGCCCGC
O2	ATGTCCCGGGCCCAGCTGGCTTGCGCGCTGCCCAAACGCGGGAAGGGAACATAA	CCAGGCAGCAGAACC
A2	ATGTTAAGGTTGGGAGCGAGCAGGGTCTGGTTCAAACGCGGGAAGGGAACATAA	GCAGAGCCACGCACC
O1	ATGTCCCGGCATCGGGCAGCATTCACCGACCCCAAACGCGGGAAGGGAACATAA	TGGGAGTTCCTATAA
O1	ATGCAGGCGACGCGCCGGGGATCAACCCCAAATAAACGCGGGAAGGGAACATAA	GAGTCGCGGACGCGT
O1	ATGTCCACGTTCCCTCGGTAGTGACGTTGGTACAAACGCGGGAAGGGAACATAA	CCCGGCCGGCTCCCC
A2	ATGGCGTTGCAGGTTGGATGCTAGGTCTGTCCCAAACGCGGGAAGGGAACATAA	GCGGGTCGTTGGTAC
A2	ATGGCGGGCGTGCGTGGACAACAGGCCGCCCTTAAACGCGGGAAGGGAACATAA	GTGTGCCCAGGGATG
A2	ATGCCGGGGCCCTGGCGGGTCCTCCCCCGCTTCAAACGCGGGAAGGGAACATAA	GGGGCCCGGCACCCG
A2	ATGCTTGTGGCCTCCTGATTTAGGCCTCACATGAAACGCGGGAAGGGAACATAA	GCCAGAGGAAGCCGA
A2	ATGAGACTACCTCAAAAGCTTCACCGCCGCCGGAAACGCGGGAAGGGAACATAA	AAGGAAGGACGCCGG
A2	ATGCCCAATCAGTGAAACGGAATCTCCGGGGGCAAACGCGGGAAGGGAACATAA	GGGGGCCGGGGGACG
A2	ATGGAGGATTCTGATACTGCTTTCGGTGCCCCTAAACGCGGGAAGGGAACATAA	GCGGGCCCCCCGAGT
A2	ATGCGGGCCAGTCGCGACAACGAAATCCTCAAGAAACGCGGGAAGGGAACATAA	GACGCGCCCCGGTGG
A2	ATGCGTGAGGCTAAATTCGAGACATATCATTACAAACGCGGGAAGGGAACATAA	CGGGGGCGAGGGCTG
A2	ATGGGTGTTAGGGGCGCATCGAGCGCGGTCCTGAAACGCGGGAAGGGAACATAA	GCCGTCTATCGGCCT
A2	ATGAGATCTTCGAGAACAAGCACGCCACTGGCCAAACGCGGGAAGGGAACATAA	CTACCTAGGGTCGAC
A2	ATGGTAAAACGGTAGAAGAGAAACGTGGCCCGGAAACGCGGGAAGGGAACATAA	CTAGTGGGGGCGGAG
A2	ATGATAAGCAAGCACACCAAAGAATCCGGCTACAAACGCGGGAAGGGAACATAA	GAGGTCACTGAGACA
A2	ATGCGAATTTAGTAATGACATCGCTGGCCGCGCAAACGCGGGAAGGGAACATAA	TCAGGCGCGGGGAGA
A2	ATGGTTCGAGCCCCTACTTATATTGCGCACCGGAAACGCGGGAAGGGAACATAA	GTGTAAGCGAGACGG
A2	ATGTTGGGGGCCGGACAAGATTGAGTGACGTTCACGCGGGAAGGGAACATAA	CGGAGGAGCCCGCGT
A2	ATGCCAGCCACACCCCAGTAAACCCCAGCACACAAACGCGGGAAGGGAACATAA	TTACGCCGACGGTAC
A2	ATGTGTTACTATGGAGATCATATACGGGCCCCTAAACGCGGGAAGGGAACATAA	AACGGCCACGAGGGC
A2	ATGTATGAGGTCCTCGCGTGGTGGTATGATCACAAACGCGGGAAGGGAACATAA	TCGCGGGTCGGGGGA
A2	ATGACTACAACTTGCGCGGCAATCCCGACCCACAAACGCGGGAAGGGAACATAA	TTGAATGGAACCCGC
O2	ATGGCGCGTCCCATCCGTGGTCTGCTCACTAGTAAACGCGGGAAGGGAACATAA	GCCGGTGACGCGTGG
O1	ATGAACCGCGCAGGTCGCTCCCCCTCGTCGAGCAAACGCGGGAAGGGAACATAA	AAGCTGTCGATTATT
O1	ATGCGGAGGCATAAGGGCCCCCGCCTCGCCGAGAAACGCGGGAAGGGAACATAA	GGGGCGCTCACTGT
O1	ATGGCCCCACTTCGTCGGAGACTGCTCCGCGTCAAACGCGGGAAGGGAACATAA	TATGTGTGATAAATGT
O1	ATGGAACCTCAGTTTCGCCCAGTCCTTTCGCATAAACGCGGGAAGGGAACATAA	GTCGCGCGCGGTTGG
O1	ATGCGCTCCTCGCCCGGCACCCATCCGCAGAGCAAACGCGGGAAGGGAACATAA	CTCCCGAGGACGAGT
O1	ATGCGGGGACGCCGTCGCTTTGGCGGCCTAGTTAAACGCGGGAAGGGAACATAA	CGTAGAGCTCGCACA
O1	ATGGCCGTAGCTCGCCCGAGGCCTGAGCTCGGTAAACGCGGGAAGGGAACATAA	CCCGGCTTTCCCTAG
O1	ATGCCCCGGGGCAGCCGTGCTTCTCCAGATCCTAAACGCGGGAAGGGAACATAA	CGCAGGGGCCCGGGT
O2	ATGGGACACGTGGGTCCCCCACGTGGGCGGGCGAAACGCGGGAAGGGAACATAA	TGCTTCAGAAGCCAG
O2	ATGCTCTGGCCCCGCCGCTCCCGACTTGGCCGCAAACGCGGGAAGGGAACATAA	GGCCGACCACACAAT
O2	ATGCTCTTCTCTTCGTTAGCCCTTGACCTGTCTAAACGCGGGAAGGGAACATAA	CTGGGGACCGGAGAT
O2	ATGTGATTCCATCATCCCAATGCTCCGTCCCTGAAACGCGGGAAGGGAACATAA	GGGGCGGCAGGAGGG
O2	ATGCCTGGGTGGGAACTGGTGTCTGCGTACTCGAAACGCGGGAAGGGAACATAA	GGGCAGAGCGGTCAA
O2	ATGGCACCGCCAAACCTCATGGCATTGCGTTTTAAACGCGGGAAGGGAACATAA	ACCGGCCGAACGTTC
O2	ATGCGCCCAGATCGCATGGCGGCCGCCATTGCCAAACGCGGGAAGGGAACATAA	GCCGGCGAACGCCAG
O2	ATGCTCCGGCTACACCCCGGTGCCGGTGGGGGCAAACGCGGGAAGGGAACATAA	TACGCGGCAACACGA
O2	ATGCGCTGACCGCCACGCAGTCGGCCGGTCCAGAAACGCGGGAAGGGAACATAA	TGGGAGCTAGATAAC
O2	ATGCGCGGGCCCGAGCTTCAAAGACGCCTCTCGAAACGCGGGAAGGGAACATAA	GGCGAAGGCCACGAC
O2	ATGCAGGCTCTGGGCTGACGGACACGGTGATTAAACGCGGGAAGGGAACATAA	GGGGACTGACAAGGC
O2	ATGCCGCATCTGTACTCGGCTTACGGTCGGAATAAACGCGGGAAGGGAACATAA	GGGGCGCGGGAAAGC
O2	ATGATATTCGTGTTCTGGAGGCCTGCGCTGCATAAACGCGGGAAGGGAACATAA	GATGTTGCCTCCGGC
O2	ATGCGGACCCCTGCTCTGGCCGCCTCGTCCCGGAAACGCGGGAAGGGAACATAA	GAGCGATGCGGCCCG
O2	ATGCATGCGGGCGGACCCCGGGGCAAGCTTGGTAAACGCGGGAAGGGAACATAA	CCGGGCGGCCCCCCG
O1	ATGCGGGCCCCATGCCGCACTGGAGTGCTCCACAAACGCGGGAAGGGAACATAA	GGGGGAGGGGGGCCC
O1	ATGTGGTCCGACGCCTAGACATCGCGTCGCCCAAACGCGGGAAGGGAACATAA	CGCGTGATTTCATCT
O1	ATGCGGGCGCGCACCTCGGGCCGCGGCGTCCAGAAACGCGGGAAGGGAACATAA	CACGCACTCGGGCCG
O1	ATGTCAGGCGCACTCTGGTTCCCCGCGAGCCAGAAACGCGGGAAGGGAACATAA	AAACGGGGTGGGAGA
O1	ATGTATAAACCTCGCGACCTGTAGTCGGTCTCAAAAGCGGGAAGGGAACATAA	GGTTCCACTAAGTTT
O1	ATGCTCCGGGCGGTGGTCCGGGTCCGGGAACGCAAACGCGGGAAGGGAACATAA	GGAGGCGTGCGAGCGA
O2	ATGGTCGCTACGTGCGCTACCCTCATTCGTCGCAAACGCGGGAAGGGAACATAA	TTACGTAACGAGCAA
O2	ATGTATACGCCGCACTGTCCCTTATAAGCCTAAAACGCGGAAGGGAACATAA	GTTAGCCCGACAACG
O2	ATGCGGGCCGGGCGGTGACGTCTTGCCTGCCTGAAACGCGGGAAGGGAACATAA	GGACGGTGGGGCCGC
O2	ATGCAGCGGCCCAGGTCGCGGTCCCCGGACGATAAACGCGGGAAGGGAACATAA	GCATAGTCATGACTT
O2	ATGGCACGTGCACCCCCTGGTTTTGCGCCACTTAAACGCGGGAAGGGAACATAA	CGTGGCGCCCCGCG
O2	ATGTAACGATCCACTTAGCAACCCATGATAGATAAACGCGGGAGGGAACATAA	CGAGGTCAACTTCTC
O1	ATGCCCATACGGGGATTCTGGGCCGCAGGGCACAAACGCGGGAAGGGAACATAA	TGAAGCCGGCCATC
O1	ATGCAGCGCTGGTCTTAGTCACCTGGACCCAAGAAACGCGGGAAGGGAACATAA	CGGGCGGCATGGC
O1	ATGAACCCCCTGGCGCGGCGGGGCAACCGGCCCAAACGCGGGAAGGGAACATAA	GGCGCGCGGGGGCAG
O1	ATGCTGAATCCAATCGGCGGCACCGTCAGGGAGAAACGCGGGAAGGGAACATAA	ACTTGCAATGTCTTC
O1	ATGGACGCAAGCGCGCCTCTGACGTGCGCCACCAAACGCGGGAAGGGAACATAA	ATCGCCCGGCCTTCG
O1	ATGCAATCGTCTGGCCCCCGTGCGGGCACGTGCAAACGCGGGAAGGGAACATAA	GGCGGCGAACGGGAT
O1	ATGCCGGCAACGCGCATGCGCCTCCCTTAGCGTAAACGCGGGAAGGGAACATAA	CAGGACCGAATGGCT
O1	ATGCCCGCGCCAGGGATCTAGGCGTCCCCAGCCAAACGCGGGAAGGGAACATAA	CAGCGCCCGGCTCGG
O1	ATGATCGGTTCCGGGCCGCGGGGAACCTACACCAAACGCGGGAAGGGAACATAA	TGCATCAGTCAGTTT
O1	ATGCTTCGTAACGAGTCTCCTTTGCGTCCGCGGAAACGCGGGAAGGGAACATAA	GTTATACGGGATGTG
O1	ATGATTGCCTGGTACCAGATAGCGGGCCCAAATAAACGCGGGAAGGGAACATAA	ACGGGAGTGTCTCCC
O1	ATGGGGCGCCCCCGCAATCGTCCCGCTCTCTGAAACGCGGGAAGGGAACATAA	TTCGACCCCGGTCAC
A2	ATGAGAAGAAAGTGAGGTGAACTTTGGGCCGGGAAACGCGGGAAGGGAACATAA	CCTGCCCGGCCTGGA
A2	ATGATACATGCCCGTTTCCAACCAAACACTGTCAAACGCGGGAAGGGAACATAA	TATGAACCATTGATT
A2	ATGGTTTGGGTCCAGGGATGTTAACAGGGCAAAAGCGGGAAGGGAACATA	CGGGATCCCTACAAC
A2	ATGAGGGGGAAGGCTCGCGAGATGCTTCGCGGCAAACGCGGGAAGGGAACATAA	TCGGCGGCCGGCTAG
A2	ATGTGGTATAGGATAAATAGCCCCTCGGCGGTGAAACGCGGGAAGGGAACATAA	TTGACAGTCACGGCC
A2	ATGCCTTAAGCGATAACTATACCCGGGAAGGCCAAACGCGGGAAGGGAACATAA	CCAGCAGGGATT
A2	ATGTATTATAAGGGACATCTGAGTGGCGGCCCTAAACGCGGGAAGGGAACATAA	GCACGGGCTATCGGC
A2	ATGATAAGGATCCACACGGGGGAGAGGCAGCGTAAACGCGGGAAGGGAACATAA	CCGGGGGGAGAGAGG
A2	ATGGCTGGGGGGCGTCGGTTTTCAATCGACCGGAAACGCGGGAAGGGAACATAA	GGGGGGCCGCACGTC
A2	ATGCTAACCCTACACACCGACCCCAGTGTCGATAAACGCGGGAAGGGAACATAA	TGGCGAGCCGGGCCG
A2	ATGAGGTGGCTCGCTGAGGCGGGGTGGCACTTCAAACGCGGGAAGGGAACATAA	GGGGCACGCAGCGGA
A2	ATGGGCTAGGCGTCTCGGACCAGACGCCTCTTCAAACGCGGGAAGGGAACATAA	CCCCGGCCGGCGCCC
A2	ATGGCGCGCCGTGGGGCCGAATAAGTCGGCATGAAACGCGGGAAGGGAACATAA	TGCGCCGGGGGGGCC
A2	ATGATGCACGCCGGCCCACTCATTCAGCACCCTAAACGCGGGAAGGGAACATAA	ATAATAGGAGTAAAC
A2	ATGCAAAGTGACACACGCCTCAACCCGATCACCAAACGCGGGAAGGGAACATAA	GGAGGGAGGGAGACC
A2	ATGGCGGCTACACCCCACACGGCCCTCCCCGCCAAACGCGGGAAGGGAACATAA	GACTGATGCAGGCGG
A2	ATGGTGGGCCGCTCTTGATGGGGTCGGGATGGGAAACCGGGAAGGGAACATAA	CAGATTCACAGCGGG
A2	ATGTGAGTTCTGGCGAGTTTCCGCGGGGCTCACAAACGCGGGAGGGAACATAA	GCGGGAAAGCGCTCC
A2	ATGTAAAACGACGCACGGTTCTCGAGCAGGACTAAACGCGGGAAGGGAACATAA	CGCCACGCAGGGAGC
A2	ATGTTTTCTCACACACACCATCCACGGCACGCGAAACGCGGGAAGGGAACATAA	CACACCCGGGCACGG
A2	ATGCAACCACCGGACACCCACGCCGCCCGCTAAACGCGGGAAGGGAACATAA	CCGCCCGAGCATAC
O1	ATGCCGCCAGCGCTGGCCCCCAAAAACTCGACGAAACGCGGGAAGGGAACATAA	CTCGCTGCAGTTCGT
O2	ATGCTCCCCACTACGACTAGGCCCCGAGTTTGAAACGCGGGAAGGGAACATAA	TTTCCTTGGCTAACT
O2	ATGCACAGCCCTCATACTGTTCTCAAGGAGGTTAAACGCGGGAAGGGAACATAA	GTCAAGGTGACGACG
O2	ATGAAATCCCTCCGGTACCTGCGCCGGACGCACAAACGCGGGAAGGGAACATAA	TGACGAACCCACAAT
O2	ATGTCCTTGCGGTCTCCGGCCCGGGGTTCACGGAAACGCGGGAAGGGAACATAA	GCGTTGTTTATTTGC
O2	ATGAGCTGCACCTGGGAAGCGTCCTTACTGACTAAACGCGGGAAGGGAACATAA	GCGGCAGACGTGGCA
O2	ATGAGCAACCTTCCGGTGAGCTGGGGCGGACTCAAACGCGGGAAGGGAACATAA	ATTGTAGGTGGGCCG
O2	ATGTCGCTCTCGAGCCCTTGACGACGGCCCGCGAAACGCGGGAAGGGAACAAA	GGGACGGCTCGGGG
O2	ATGGGCTCGTACGCCATGTACAGCCCACCATGTAAACGCGGGAAGGGAACATAA	GTACAGGTTGTGCCT
O2	ATGCACGGGAGGCCTTGCTGGCGCGCGTAGTACAAACGCGGGAAGGGAACATAA	CAGGGCGCCGCGCCA
O2	ATGGGCCACTTGCGCCCGCCCCTCCGGTCCCTCAAACGCGGGAAGGGAACATAA	AACGGGGTAACACGA
O2	ATGCCCGCTTTGCGCGCGCTACAACCCGCTAGGAAACGCGGGAAGGGAACATAA	GCGTGCGCGGTACCG
O2	ATGACCATTCGCACTAAGCACTCTTGATACCACAAACGCGGGAAGGGAACATAA	GGGGGGCGCGGAAGT
O2	ATGCGCGACCCCCTACGTCGGTGCTAGCACAACAACGCGGGAAGGGAACATAA	GGCGCGAACGATGCG
O2	ATGGGGATATTCACTACCTCTCGCCGGCAGCTGAAACGCGGGAAGGGAACATAA	ATTTCATTTGCGCCT
O2	ATGCAGCCGAGCCGAGCCACGCGTGATACCTGAAACGCGGGAAGGGAACATAA	CTGGGATGTCAAAC
O2	ATGCGGGACGCTATACGCAGATTATGCGTTCACAAACGCGGGAAGGGAACATAA	GGGACGGCGGTGGTG
O2	ATGCGGACGGCGCGCCTCGGTTGGTACCTGTAGAAACGCGGGAAGGGAACGTAA	AACGGCCTGCCCACT
O2	ATGCATCTAAATCTAGGCTGGCTGTAGTCGAAACGCGGGAAGGGAACATAA	GAAGCCGCGGATGCA
O2	ATGCCGAGTTCCCGCGTGGGCCGGGGATCGAATAAACGCGGGAAGGGAACATAA	GCGGGCCGGAGGTCA
O2	ATGATAAGAATAACGAGCCGCACAAATCTTGTCAAACGCGGGAAGGGAACATAA	GCTGGGCGATCAGG
O2	ATGACTGCTTGGGATCGCTCCTGCGGTGGCTTCAAACGCGGGAAGGGAACATAA	TTACGGAAGTGGGT
O1	ATGCAGCGCCCGCGCCAAGCCACGCTTGCCTTCAAACGCGGGAAGGGAACATAA	CGGGGACCTGTCGAG
O1	ATGCGCCGAGAGCGCCGCGGCTCCCCTGCACCTAAACGCGGGAAGGGAACATAA	CCACGACTGCACCCT
O1	ATGCGGGAGCCGGCCCTAACGTACTCCACTCCTAAACGCGGGAAGGGAACATAA	CCTGCAACCCAAGGC
O1	ATGGCCTCGGGCGGGTCTCCCGTCACTCGGCACAAACGCGGGAAGGGAACATAA	ATTCCGTTTTGATTC
O1	ATGCCCACTGCAGGCCTCCCGCCACCTCCGCCGAAACGCGGGAAGGGAACATAA	GTGGCGAGGCCCCCG
O1	ATGACGAAACTGAAAGAGCGCATCAGCGCAAGAAAACGCGGGAAGGGAACATAA	GAATGGTGGCTCG
O1	ATGGTAGCCGCTCATCGCCCGACTGAAACCCCTAAACGCGGGAAGGGAACATAA	GTGGGACGCTCGGTT
O1	ATGCCTCCTACGCGCCCACCCGCGCGCACGCCGAAACGCGGGAAGGGAACATAA	GACGCGGACGCCTC
O1	ATGCGTCCCGGTTCCTGGCTTCGTGCCGTAAACAAACGCGGGAAGGGAACATAA	TGGTCGCACGCCGTG
O1	ATGTAGTCACCCGGGTTACCTAGGACAGTCCCTAAACGCGGGAAGGGAACATAA	GTGTACTGGGAGCT
O1	ATGCGCAGCACCCTGCCACGCTATCTCGCCCCGAAACGCGGGAAGGGAACATAA	ACCAGACGGGCTGCT
O1	ATGGATCTCTGATTCACCGACTCTCATCACCGTAAACGCGGGAAGGGAACATAA	GGAAGACGGGTTCCG
O1	ATGTAATACACCCTCGGCTGTTGGGGCGTCAGCAAACGCGGGAAGGGAACATAA	GCCCCAAAGGAGTA
O1	ATGGGCTACCGTCGAAAAGCCTCTTGCAGCTGCAAACGCGGGAAGGGAACATAA	GATGATGAGAACTGC
O1	ATGGCCTCGGGCCCACCAGTACTTCTGCAAATGAAACGCGGGAAGGGAACATAA	CACGCCCGATGAATC
O1	ATGCCGCGGCCCGGGTTCTTGACTCCCCGGCTCAAACGCGGGAAGGGAACATAA	AGTTCAACTCGGGTA
O1	ATGAAAACCACTGGCATCCTCCGGAGCACGCCCAAACGCGGGAAGGGAACATAA	GCCTGGCGGGCAGCG
A2	ATGACCCTGCACGACCCGTATCATTATTCCACAAAACGCGGGAAGGGAACATAA	CGGACCGCTACACGC
A2	ATGGGGTTTCCCGCGTCTAGGACTCGGCTCCACAAACGCGGGAAGGGAACATAA	GTAATAATGTGTCA
A2	ATGTAACCTCTGTGGAGCCGGAGAGCCTCCCGGAAACGCGGGAAGGGAACATAA	GCATCGCCAAGCGGA
A2	ATGATGAATATTTAAAACGCAGCGTTCTCGGTCAAACGCGGGAAGGGAACATAA	ACTCCGCGGTCGGAA
A2	ATGTTTGATTAGACTTCACATACTATTCACCGTAAACGCGGGAAGGGAACATAA	GGGGGCCATTGACCC
A2	ATGGGTAATCACCCAGACCGCGGACCCCTCGACAAACGCGGGAAGGGAACATAA	TCGGGCGGGCCTGAG
A2	ATGGTTGTGGGCGGAATACAGGAGGCCGAGCTAAAACGCGGGAAGGGAACATAA	GACGGGCTCAGGATT
A2	ATGGGATTACTGGCCTTCACTAGTTCATCTCCCAAACGCGGGAAGGGAACATAA	GGGAGGCGACCACAA
A2	ATGGAGATCACACGGTAACCGATCCTGCCCCGAAACGCGGGAAGGGAACATAA	AGCAGTTGAGCGCAG
A2	ATGGCAGACCAGTGTGCGTACCGCCTCGGTCAACGCGGGAAGGGAACATAA	CCAACTCGACAGCAG
A2	ATGTTAGAAAATCAAAGAGGATACCCGTGGTTTAAACGCGGGAAGGGAACATAA	CCGCAGACCAGCGAT
A2	ATGTGTTAGGACCCATCCCCTTTTCCGTCACACAAACGCGGGAAGGGAACATAA	CAGGGCATTCCGCGG
A2	ATGATTATGAAGGGATAGGTGGGGGAGGCGCACAAACGCGGGAAGGGAACATAA	GGGCCGGGGAGCTGC
A2	ATGATTCAACAGGCGATAGATGTGTCGGCCGGGAAACGCGGGAAGGGAACATAA	TGACCGCTACGGAGG
A2	ATGCGATGGATCGGAAAATATCCCTTACGAATGAAACGCGGGAAGGGAACATAA	CGCCCGGCCGGCGCC
A2	ATGACCCACAATACGCGGCACCCACAGTTCGTGAAACGCGGGAAGGGAACATAA	GGGGAGCAAGGGCTC
A2	ATGCGCGGGGTGAACGGAGCAGCCGCTCGCTAGAAACGCGGGAAGGGAACATAA	GCGGGGGGACGGAA
A2	ATGAGGGCGTCAGATTTTGCACCCCAAGAGGTTAAACGCGGGAAGGGAACATAA	TCATGGAGGGGACGA
A2	ATGCTTCCCCGGCCCTCGGCATCGGTGTAGTGCAACGCGGGAAGGGAACATAA	CGCGTCCTGGCCGCT
A2	ATGCACACACATCAAACCAAACAACAGAACCAGAAACGCGGGAAGGGAACATAA	GGGGGCCCGCCGCAG
A2	ATGAGTATAAAGGGAAGAAGACTTCCGGTCCCTAAACGCGGGAAGGGAACATAA	GGACCCGGATTCGAG
A2	ATGATCAAAAATCAACTCGTTCGACCCCCCCCTAAACGCGGGAAGGGAACATAA	CGACAGCGAGCCGGG
A2	ATGGTACACCACTCCACCCGCGGCTCCGCCGCAAAACGCGGGAAGGGAACATAA	ACCATGGTGCGCAC
O1	ATGCCCCACGGCGTCTCCCTCCAATGCAGGCCGAAACGCGGGAAGGGAACATAA	GACCAAACTGGTCAA
O1	ATGCCCGCACCTCCCGTCATGGAAGCGGTGTGCAAACGCGGGAAGGGAACATAA	CGGCGGCGGTCGCCC
O2	ATGCCGCCCGTCTGCCGCACATATCGAGTACTCAAACGCGGGAAGGGAACATAA	GCCCGGCGGTCCGGA
O2	ATGCTCCGCCTAGCTCGCTCGTGCGCTGGCCCTAAACGCGGGAAGGGAACATAA	CCACGCGTCCGGGGA
O2	ATGTTCCGTTATTGATAAACAACCTAGCCGTACAAACGCGGGAAGGGAACATAA	GACATATAGACACGC
O2	ATGCCCGCCGCGTTCGGGGAGTTGCAATAGCTTAAACGCGGGAAGGGAACATAA	CGGTCAGACACATGG
O2	ATGCCGGCGGCCCACCGCCTGTGGCCGTACAACAAACGCGGGAAGGGAACATAA	TCTGCCCGGCGGGGG
O2	ATGGCACCTGCCCTCGTTCTGACCGGTCCGAGCAAACGCGGGAAGGGAACATAA	CTCGTTTGCCCTGAT
O2	ATGTTGGCACTCGCTCCCGCCAACCATCCGTGCAAACGCGGGAAGGGAACATAA	ACATGCAGGCCAGAT
O1	ATGCCCGAGGCGTCTACGGTGGTTGCGGCCGCTAAACGCGGGAAGGGAACATAA	GCAGGGGTCTGGCCC
O1	ATGCGCACTTCCTCCGCGTGTTTACCCCTTCCTAAACGCGGGAAGGGAACATAA	GCACCCGAAAGGTGC
O1	ATGCGTGCGCACCGCACGTGTCTCACGCTGCCTAAACGCGGGAAGGGAACATAA	CCTCCCCGGTCGGG
O1	ATGCCCTGCGCCCTGCCTTTCCCCGCCCGGGCCAAACGCGGGAAGGGAACATAA	CGGGAGGGGGACCGT
O1	ATGCCGCGGGTCCGGATCAGACGGACGAGCACGAAACGCGGGAAGGGAACATAA	CCACGCGCCGTCGCT
O1	ATGACCGCCGTTCCCCTAATCTTGAATCACTACAAACGCGGGAAGGGAACATAA	GATCGAACCCTGTAT
O1	ATGGCCCCTCGCGCTGCCGCGTAAGAAACTCATAAACGCGGGAAGGGAACATAA	CGAACATATCTGTTG
O1	ATGGATGCATGCAGTGGGCACCCCTTGCCTGATAAACGCGGGAAGGGAACATAA	AGACCCCCTATGTCA
O1	ATGGCTCGACTCCGCCTTCGCCGACGCGCGGACAAACGCGGGAAGGGAACATAA	CAATGCGGGTATTCTC
O1	ATGCCATTATCATCTTCTCCGGCACGAGCCCCTAAACGCGGGAAGGGAACATAA	GTGTTGGCATACTA
O1	ATGCCCGGAGGCCACGGGTCCTCCTTCCTACGTAAACGCGGGAAGGGAACATAA	ATTCACCGCCGCAAT
O1	ATGTTGCCCGGGCCTCAACCCCGCCCCGGCACCAAACGCGGGAAGGGAACATAA	ATCGACCCCGAGCCG
O1	ATGTTCCCAGTGGGTCAACGGCTCTCGTACGTTAAACGCGGGAAGGGAACATAA	GCACCGGGCCTGGCC
O1	ATGGGCCGCCCTCACGCGCTAGCCTGTCTGCTGAAACGCGGGAAGGGAACATAA	ACACGTACCTGATG
O1	ATGGTAGGTACACTCCGCTGTCATCCCCTCCATAAACGCGGGAAGGGAACATAA	ATAGCTGAGTCTTCT
O1	ATGTTCCGTGCCAATCCCCGACCGTTCCCCCGGAAACGCGGGAAGGGAACATAA	CGTGCCCTACGGCTG
O1	ATGCGTTTCCAAGGCCACAAGCCGCTCGCATAAACGCGGAAGGGAACATAA	CGGGGGCCCCCCGAC
O1	ATGAACCGTGGGCTGCCGTCATAGGCAAGGCCCAAACGCGGGAAGGGAACATAA	TGCGATCAAGCCGTA
O1	ATGCTCTTCTACCGGACAAGACGGTACCCAGCTAAACGCGGGAAGGGAACATAA	GGGCCTGCCGCTCGC
A2	ATGAATACCAAAACGAGACCCCCACCGAGGCGGAAACGCGGGAAGGGAACATAA	CGTGTCGCACCCGCG
A2	ATGTTCGTGTGTTGGGACCAACAGTCCGCGCTAAAACGCGGGAAGGGAACATAA	GCGTGGGCGAAGGGG
A2	ATGACACCGGAGACCCCCCGGGAACCCTCCCTCAAACGCGGGAAGGGAACATAA	GGACGAGGCTGGATC
A2	ATGAGTGTGGTGTGGTTTTAGGATCTCCACCGTAAACGCGGGAAGGGAACATAA	GAAGCGAAGATCGTC
A2	ATGCACGATACGTCAGGACATAAGTCGGGCGCTAAACGCGGGAAGGGAACATAA	GCGGGCCGTGAAGGT
A2	ATGGATCAGGTTTATCAACCCTCCCATTCCTATAAACGCGGGAAGGGAACATAA	CAGCCAGGTGCTCAG
A2	ATGCACCAAGTGGGCTCAGGATCGTCGAAGGAGAAACGCGGGAAGGGAACATAA	CGGTAACGCCTGCCT
A2	ATGCAGCGACACGGATGAGAGGGCGGGACCCCCAAACGCGGGAAGGGAACATAA	GCAAGCGGGAGGATG
A2	ATGAAGAAAAGGAACGATCAGATTGGGCACCACAAACGCGGGAAGGGAACATAA	CGGTGGGTAACGACA
A2	ATGATTTGGGAGCGGGGAGCTTCCGGCGCCCCTAAACGCGGGAAGGGAACATAA	CGAGGGCGACATCCC
A2	ATGTTCCATTTCACCTCCTCCAAAGCTAGGCCCAAACGCGGGAAGGGAACATAA	GAAGCCGACGACCCA
A2	ATGACGGTGATGCCGGGGGTGAGGCGCCCCCGGAAACGCGGGAAGGGAACATAA	GCGGGGGCGCAGGGG
A2	ATGCAACATAAGTCCATATCTAGGCCAATCCCGAAACGCGGGAAGGGAACATAA	TGGTATCCCTGATAG
A2	ATGACCCTCCAACCCCACCGTTCCGACACGCGGAAACGCGGGAAGGGAACATAA	CTACCCTACCACCCT
A2	ATGCACACACAGCACCCACGACCCTAAACCGGGAAACGCGGGAAGGGAACATAA	GCGCGGACGGGGTAG
A2	ATGGGGACTCGGGGGAGGCGGGCGCGTCGCGGCAAACGCGGGAAGGGAACATAA	CTGAGGTCGCCGGAC
A2	ATGAGGGATTTCGGCAGGTAATGTACGTAGCGTAAACGCGGGAAGGGAACATAA	AGACTTTAGCCGCGG
A2	ATGTGATATGTCCAGTGAGGGATTCTGGGCGGTAAACGCGGGAAGGGAACATAA	AAGGGCCGCGCCGG
A2	ATGCCGCCGGGTCATTCCAGAGACACCGCGGATAAACGCGGGAAGGTAACATAA	CGTGCGGAGGCCCGC
A2	ATGTCACGGAGGGGCTTCGGGGCCGCCGCCGCTAAACGCGGGAAGGGAACATAA	TCACCGGCTGGCCTC
A2	ATGGGATCCACCGCGTCACCTCCCGCCTCTTGAACCGGAAGGGAACATAA	ATAGACCCGGAAGCC
O2	ATGGCCGCCCGCTCCCGGTGCGCCTGTCGGACCAAACGCGGGAAGGGAACATAA	TGGAGACGGGGAATT
O1	ATGCCCTCTGCCTGCCTAAGTCCAGGTGAACGGAAACGCGGGAAGGGAACATAA	GACCCGGTGCCTAGA
O1	ATGGATAAAGCTCCACGATCGGAGCGGGCCGACAAACGCGGGAAGGGAACATAA	ACCCTCCTCGGTGCC
O2	ATGACATAGGGCATAGGCGGGATATCATCCCTAAACGCGGGAAGGGAACATAA	GCGGCTGGCCACCCC
O2	ATGTCTTCCGGGCGCTGGCTTTACACTCGGCTCAAACGCGGGAAGGGAACATAA	GGCGACGAGAGGGCT
O2	ATGGGCTTCTCCGCCCCTCGCGTACTTTTGCGGAAACGCGGGAAGGGAACATAA	GGCACGAAGGGGCAG
O2	ATGCGGCTAGGGGCCCTCCCGTACACGCGCCATAAACGCGGGAAGGGAACATAA	GCGATTGACACACCA
O2	ATGTGACGGCGATGGTCGCTGGATCCGCCCCGGAAACGCGGGAAGGGAACATAA	GCGTGACCGACCTCA
O2	ATGGCCGTCCCTACGCCTTCTCCCGCTCTGCCGAAACGCGGGAAGGGAACATAA	AGGGCCCGACTCAGC
O2	ATGCCCTCTGCCAGGCGCCCTTCGCCTCGCTCGAAACGCGGGAAGGGAACATAA	GGTGGTGGAGCC
O2	ATGCCGACATGCGCGCCACTGCCCCGTCGTGTCAAACGCGGGAAGGGAACCTAA	ATGGGCGCCATGCC
O2	ATGGCCGCCCGCCCATACCCTTTTACACGCACCAAACGCGGGAAGGGAACATAA	ACAGAGCGCGCCCGT
O2	ATGGCCGATACCTACGCTCTGGCACGGATTCGGAAACGCGGGAAGGGAACATAA	GTCCCAGACGTGGTG
O2	ATGTTCAGCGACCACACGCCTCGCTTCGCAGGTAAACGCGGGAAGGGAACATAA	GCAAAAGCGAAGCCC
O2	ATGTAGGGGTGGCCCCGGGCCCGACCCCTACTTAAACGCGGGAAGGGAACATAA	AGAGCCTGGGGCCGC
O2	ATGCGGGCTTCTGGCATCTTTCACATTCGCATCAAACGCGGGAAGGGAACATAA	GGGCGGCACGCGGAC
O2	ATGCGAACGCGGAGCGACTCTTCACTAAACGCGGGAAGGACATAA	CACCGGCGCGAGTCC
O2	ATGATGCCCACGCTTCAACACCCATTTTGAAACGCGGGAAGGGAACATAA	TCTATTCCCACCAAC
O1	ATGTTACTCCCCTCCTCGCGTGCGTCCGTGTGTAACCGCGGGAAGGGAACATAA	TGGCACACTCGATTT
O1	ATGGCTACCGCCCTCTTGTATGTATGCGCCCCCAAACGCGGGAAGGGAACATAA	GTGTCAGATGTGTTT
O1	ATGCGCACGCCCCCACATTTCTGGGCCCGGCCAACCGGGAAGGGAACATAA	GCCGGACGCGCACGG
O1	ATGTCTGCGCCGTATCTCCCGTACAGCTGTTACAAACGCGGGAAGGGAACATAA	TGCCTTCCAGCTTCG
O1	ATGCTCGGGCTCATCCCCGCAACGGGCCATTTGAAACGCGGGAAGGGAACATAA	GCAATTCCTGGTGTT
O1	ATGTGCGTGGATCACGCTGGCGTGGGTCCCGATAAACGCGGGAAGGGAACATAA	GAGCATTACGTTGGA
O1	ATGAGAGAAAAAGAGCACCCCCAACTGCGCCACAAACGCGGGAAGGGAACATAA	CCGCAACTACGTTTG
O1	ATGCCTTCCGGTCAGTAACGGCACCGATGTCGCAAAGCGGGAAGGGAACATAA	CGTGCGGGCGGTAGA
O1	ATGTCCGGGGGCCGGCACCGTGCCCCTGGGGGTAAACGCGGGAAGGGAACATAA	GGGTTGGGCAGCAGT
O1	ATGGCCTCCCGCCGAACGGCACTCTTCGTCCGTAAACGCGGGAAGGGAACATAA	ACCGTAGCGGTTAGT
O1	ATGCCCCGGATGTAACTGCTCACGTCGGATGGGAAACGCGGGAAGGGAACATAA	GAGGCGGTTGTTGTC
O1	ATGTCAAATCACAAAGCGCTTCGTCAGGCGCCCAAACGCGGGAAGGGAACATAA	TCCTCTGCGCTCGGC
O1	ATGCTCGCAGCAACCACTGACGGCCACGCTGATAAACGCGGGAAGGGAACATAA	GGACGGGACAACCCC
O2	ATGGGTACTTTCTGCTCACCCTCGTGTCCCCTGAAACGCGGGAAGGGAACATAA	TTATCTGACTTCCAG
O2	ATGCCCGCTAAGCACGCAGGCGGCCCCTGTCTGAAACGCGGGAAGGGAACATAA	CGGTCGGCGACGCGG
O2	ATGGAGGGGCCGGTTTGTATGCCCGTCCATGCGAAACGCGGGAAGGGAACATAA	GGCGGGCGAACCAA
O2	ATGTGATAGTTCGACGACCGTCGTCTCAACAGAAACGCGGGAAGGGAACATAA	GCACCGCGCGGCGAC
O2	ATGCGCCTGCTGTGTCCTCACCTTGCCGTATCCAAACGCGGGAAGGGAACATAA	GATAACCCGCCGGGT
O2	ATGCGGTACCCTTTGACCCGGGCGTCTGCATTGAAACGCGGGAAGGGAACATAA	CCGGACACGGTGCCA
A2	ATGTGCTATGACTCCGAACGGACGCATGGCCCCAAACGCGGGAAGGGAACATAA	TGTACAGGAACCGCA
A2	ATGGCAATTCAGCGCCATAGCACGCCGGGCCGCAAACGCGGGAAGGGAACATAA	GGAGTGATCGGCCCG
A2	ATGGAAAACAGTCGAGACAGAGCCCACAAAAAGAAACGCGGGAAGGGAACATAA	AAAGAAAACGAGTAC
A2	ATGGTATTCAAGCGCGTCAATGACCGGGACGCCAAACGCGGGAAGGGAACATAA	GGCTCGCCCCCGGAG
A2	ATGGGTAGTACACGGAGGCTTGGCGCGTCCGGTAAACGCGGGAAGGGAACATAA	GCCGGACCTGCCGGT
A2	ATGGGCGCTATTGTTGGGTGAGGGCGGTCCGCAAACGCGGGAAGGGAACATAA	GCCGGACGAGAAACG
A2	ATGGGTTGGGGGGCGGGGACTAACGGAACCCAGAAACGCGGGAAGGGAACATAA	GCCGAGTATAGGTTG
A2	ATGATCGATCCCGATTACCTCACGGCGAAACGCGGGAAGGGAACATAA	GAAAATCGCGCCGG
A2	ATGCCCCCTAGCACCCGCAGGCCCAGACCCCGTAAACGCGGGAAGGGAACATAA	GAGGCGTCCGCAGAC
A2	ATGGATTTTTGGGGGTGACCCAGGGGCCTCCGCAACGCGGGAAGGGAACATAA	GTACGAGACGGGGAC
A2	ATGTATTATGCCAGCACTACATACCATAGTGCCAAACGCGGGAAGGGAACATAA	AAGGGGCCGCTCCGT
A2	ATGCGGGTTTGGGTGGGCAAAACAGGGCTGCCCAAACGCGGGAAGGGAACATAA	CGCGCGGGCGGCGAC
A2	ATGTGTATGGAATCCTCTCGGTGGCAGCGACCGAAACGCGGGAAGGGAACATAA	AGGGTGCAGCCGGAG
A2	ATGTTTTTTTATGGTTTAAAGCCCGCGGTCCCCAAACGCGGGAAGGGAACATAA	CGCTTGGATGCACGG
A2	ATGATCTATAAGAACGGCCAGGCACTTGTCTTGAAACGCGGGAAGGGAACATAA	GTGTATGAGTGCTCT
A2	ATGAGACGGAAATTAGCAGGTGATGAGAATCTCAAACGCGGGAAGGGAACATAA	AGGCCGAGGGCACCC
A2	ATGAAAACACAAGCCCACCAAAACATCCGACCGAAACGCGGGAAGGGAACATAA	CACCTAAACGATTCC
A2	ATGGGGCGCCCCGCGGCTGGCCGCAGCTCGTTCAAACGCGGGAAGGGAACATAA	CCGGTGGCCGGCCCG
A2	ATGGGGCGGGGCCGTGCGACCCGCCCGGGCCGTAAACGCGGGAAGGGAACATAA	ATCCGGGCCTGACGT
A2	ATGACAAGGCCGAACACGAGCCATCGATCCCCGAAACGCGGGAAGGGAACATAA	GCGAACGAGGACAAG
A2	ATGGACCGATTCAGTTGAAGACCGACGGAGTCGAAACGCGGAAGGAACATAA	AGATGGTAAGAAACG
A2	ATGCGAGATGAAGGGATATACTGCAACAAAGGCAAACGCGGGAAGGGAACATAA	CGGACGCCCAGGGGG
O1	ATGTCTGCTCCGCCCCGGCGAGGTACCAAGCACAAACGCGGGAAGGGAACATAA	TGTCTAAAACCATCC
O1	ATGGTGCTGGCCACCCCTAGTCCCATCGGGGCCAAACGCGGGAAGGGAACATAA	GAAGGCGAAACTGTT
O1	ATGTGTCCGAGCAATCGCCTTACGAGCCCCCCGAAACGCGGGAAGGGAACATAA	ATTTCGAACCCATCA
O1	ATGACCCGGAGGCCGGTGTCCCGCTCCGTCCCCAAACGCGGGAAGGGAACATAA	ATACGACCCCGGGCA
O1	ATGCACCTGCCGGCGCGACGCCAGACGGGGGGCAAACGCGGGAAGGGAACATAA	ATGGGGCCCATTAAG
O1	ATGAACCGCGTGGCCTACGGCTCGCTGGTCCTGAAACGCGGGAAGGGAACATAA	CTCGATGGGATCCGG
O1	ATGCCAGCCCGACCCGTCATGTCTGGGCGACGGAAACGCGGGAAGGGAACATAA	AAGACGCGAGGGGGC
O1	ATGCATCCGTCCCCGGCTCGCTCCCGTGGCTGGAAACGCGGGAAGGGAACATAA	GTCGGGAGGGTCCCT
O1	ATGGCCGGGGCGGCCCGCCGAACTCCCGTTTCGAAACGCGGGAAGGGAACATAA	CACCATAGCGGTTGT
O1	ATGCATCACAGGGTATTCAACCATTAGACGCGAAACGCGGGAAGGGAACATAA	GGACTGTCGCCTTGG
O1	ATGTGCCGCCCAGCTGTGTTCCACACTAGCAAGAAACGCGGGAAGGGAACATAA	GACCGGCCTAGGGAG
O1	ATGCCCGTGAGTTCGGCTGGCAGCCCGCTTGCGAAACGCGGGAAGGGAACATAA	TCGGGGGCCGGTTGT
O1	ATGTCAGGCCGGGACGCACTCTCTGCTCAGTTCAAACGCGGGAAGGGAACATAA	GCCCCGGGGTGGTCA
O1	ATGCGTCGCTCTTTCGCGCCCCCTCTCACCCGTAAACGCGGGAAGGGAACATAA	ATCTATCCGCGAATT
O1	ATGGGAGGCATTCTCCGGCGTAATTCACCTAGTAAACGCGGGAAGGGAACATAA	GCCGGGTGGGCGACC
O1	ATGCCCCGCGCGGCATGGGCGCAACCCTCTGAGAAACGCGGGAAGGGAACATAA	CGTTGCCCGGTGCCG
O1	ATGACCGAGCTACCGCTGCTCGATCCTCGCCTGAAACGCGGGAAGGGAACATAA	TCGCTACTTGTTCTT
O2	ATGGTCTCGTCCCACGCGCTCAGAGTCGGGCCGAAACGCGGGAAGGGAACATAA	GCGACTCCTCTGGGA
O2	ATGTGTTACCCGCGCACTCCTTTGCTTTCTCTCAAACGCGGGAAGGGAACATAA	GCGCGGGCCCGAAGG
O2	ATGTTTACAGGGTTGCAGCGAACTGACTATAGTAAACGCGGGAAGGGAACATAA	TGGTGTGGCGGAGTC
O2	ATGGGTACGCCGAGCCCGCTTCAAGCCGGGAACAAACGCGGGAAGGGAACATAA	ACTAGGAGGCGCCAG
O2	ATGGGCGCGATGATTCTCCAACAAGTTGCTCAGAAACGCGGGAAGGGAACATAA	CGAGCTTGCGACAG
O2	ATGGTTCAAGCATAGGCTCTCACTCGCTGCGGTAAACGCGGGAAGGGAACATAA	CGAGCAACGGGTAGA
O2	ATGCTCGCCGCAGCCGACCGCTGCAGACCGCGCAAACGCGGGAAGGGAACATAA	GCTGGAGAGGGGCCG
O2	ATGCCCACCTAGAGCGGTGGCTTGCGGTGAGTAACGCGGGAAGGGAACATAA	GGTTGGAAGCGAAC
O2	ATGCGGGCCCGTCCACCCACGACCACCAGGGCCAAACGCGGGAAGGGAACATAA	GGTGGAGGGGAAGCG
O2	ATGGCAATAATACGCCAAGCAAGTTGGCACAGTAAACGCGGGAAGGGAACATAA	GAGGGCTCGGGCGCC
O2	ATGCCCGCTTCGTGCCGTCTCCGACCGAATCTTAAACGCGGGAAGGGAACATAA	AGTCAATGCCCCTGT
O2	ATGTAGGCCCCGCGCTAAACACTCCCTCGTCAGAAACGCGGGAAGGGAACATAA	GCCTCCCACTTAGCG
O2	ATGCATATATCCCAGTATCAGCAATCACGGCTTAAACGCGGGAAGGGAACATAA	AGCCGACTGTTGACT
O2	ATGCCCCCGCCCCGGGCACTATGCGTGCCCTACAAACGCGGGAAGGGAACATAA	CGCGCGGAATGCGAT
O2	ATGCCCTCCTCCGCTGTTGCCCCAAGATCCATTAAACGCGGGAAGGGAACATAA	AAGCCGCGAGGTC
O2	ATGTCTTGCTGGGTATACTACGCTGCGCTCAGCAAACGCGGGAAGGGAACATAA	GCACGGGCGATCGTG
O2	ATGTTTATCGCGTCCAACGGGTGTCGGTTGCACAAACGCGGGAAGGGAACATAA	GGTGGCGACCGCCCG
O2	ATGTGTGACACGCGTGCAGGTGACCCCGGATCCAAACGCGGGAAGGGAACATAA	CGCGGTGTCGCAGAC
O2	ATGCGCCGGCGCTGGCTGGTCACGGGCTCCCGTAAACGCGGGAAGGGAACATAA	AGACCTGAGCTCAA
O2	ATGCCCGCCCTCGCCGGTCTTGGTGCCCCTCACAAACGCGGGAAGGGAACATAA	GCGAGCACGGAACGG
O2	ATGTACTCCCCGGGCCCTGCGACTTCAGTCGCTAAACGCGGGAAGGGAACATAA	ATGCCCATAGCTGAG
A2	ATGCAGTTGGAAGGGCCAAGCACGCGGGAGTGAAACGCGGGAAGGGAACATAA	CGGGGGTGCCAAGAC
A2	ATGAATAAGAGCCAACAGTAAACGGACAGGCTTAAACGCGGGAAGGGAACATAA	ACAGCGTGGTGGGAT
A2	ATGGAATATATCTTAAAGGCGGGGCGCGCTCTAAAACGCGGGAAGGGAACCTAA	CATATGCTCAGTAAG
A2	ATGGGGGAGAGGGAGAGATCGACAACGCGCCTCAAACGCGGGAAGGGAACATAA	GTGCCGGAATAGACC
A2	ATGTCTGTTTTGACCGTCACCACCGGCGTCCGCAAACGCGGGAAGGGAACATAA	CACCGGCGCGGCACA
A2	ATGGGAGCGCGGCGCCCGCGGGTGCCCGCCCTTAAACGCGGGAAGGGAACATAA	GGTCGACGCTCCCAG
A2	ATGGGGGGGAGCTCTGCCGATGCATTTGCTGTGAAACGCGGGAAGGGAACATAA	CGGGGGTAGCTGTGC
A2	ATGACATCCACGCGGAAACGGCCGACTACTAGGAAACGCGGGAAGGGAACATAA	GACCCGACGGCAGGA
A2	ATGACATTGGTGCGTGAAACCATCCACTCGCTGAAACGCGGGAAGGGAACATAA	CGGGCGGCACGCGCG
A2	ATGCGGCTGGCCGCCGCCTCCTCTTCCGCTTGAAACGCGGGAAGGGAACATAA	CCCCCTAAGGTTAGG
A2	ATGCCGCAGCCCGAATCCCCAGGACCGAGTCAACGCGGGAAGGGAACATAA	CGTGCGCCTAGCCGA
A2	ATGACCAAAAGATGCACATAAAAGTCTATCGGGAAACGCGGGAAGGGAACATAA	ATGGGGCAAGAAGC
A2	ATGGCCCCGGCTCGAGCGGCGCAACGCAGTACGAAACGCGGGAAGGGAACATAA	CAGTATGGCCCCGGG
A2	ATGCTTGGTCGGATCCAAAGTCCCCCAGACTCCAAACGCGGGAAGGGAACATAA	CCGGGGGGCGGAAAG
A2	ATGACCACTCATGGAAAGGGCACCTACCGATGACGCGGGAAGGGAACATAA	TGTCCTCATGTGAAC
A2	ATGGCGGGTTCGCGTGAGCGAGGTCGGGCCGGGAAACGCGGGAAGGGAACATAA	GACGGGGCTCGCAAG
A2	ATGGTTTGTGAAGCTTTCGAAACGCGGCTTCGGAAACGCGGGAAGGGAACATAA	GGACCCCGTGGCGCA
A2	ATGTTAGACCGGGTGAGAGCTTTACCCGGCCTCAAACGCGGGAAGGGAACATAA	CAGCGAGCTGGATAA
A2	ATGGGCCCCGGTGGCAGGCCTATTCTCGGGGGGAAACGCGGGAAGGGAACATAA	GAAGGTGTCGAGCATC
A2	ATGGGGTTGGCCTGGAGCAGCAATCCAGGCCGCAAACGCGGGAAGGGAACATAA	TGGGTGCTGAGCCGG
A2	ATGCCACATTCCTCTTTCACACCACACTTTACTAAACGCGGGAAGGGAACATAA	CACCACCTTCCTGAC
A2	ATGTGGTGTGGGGTGAACGGCTTGCCACCTTGAAAGCGGGAAGGGAACATAA	GGAGGGTTTTCCAAC
A2	ATGACTCGAGAGGAATAAGGACACCCTCGCGATAAACGCGGGAAGGGAACATAA	CCCCGGGTGGCCATC
A2	ATGTCAAGTCACATACTTTAAATAGGGCCCGCGAAACGCGGGAAGGGAACATAA	CCAGGCGCGGGGCGA
A2	ATGATCCACTGCGCGTACTACCCCCGAGGCCCTAAACGCGGGAAGGGAACATAA	ACGGATCCCGCACCT
A2	ATGCGTCACGCGGGATACCCCCGCTCGCGTGAAACGGGGAAGGGAACATAA	TGGCGTGTTT
O1	ATGGGGCCCCGGCCCCTGCCCGTTTGCCCGATGAAACGCGGGAAGGGAACATAA	GGGTCCCCCCGCGTC
O1	ATGATGCCCCAGTGAGGGAGACCGCCCGGTCTTAAACGCGGGAAGGGAACATAA	ATTACGTAGAGCTGC
O1	ATGCGGCCGCCTCGCGCCCGGCGCGTCACGGACAAACGCGGGAAGGGAACATAA	GGGGCGGGGGCCCCG
O1	ATGCGCCGTGGGGCGCTTCTAGCGCCTTCCGGTAAACGCGGGAAGGGAACATAA	CCGAAGCAGGAGTTG
O1	ATGTTCTACGTCACCCTTGCCTACTACACTGCTAAACGCGGGAAGGGAACATAA	CGGGCGCGCGGGCCG
O1	ATGCCTCCACCTGCCTCGTCACCGCGTCCGTCCAAACGCGGGAAGGGAACATAA	ACCGACCGGAGTACA
O1	ATGAACCCAGTTTCCTTGTTTTACCGATGTGTCAAACGCGGGAAGGGAACATAA	CCTGGGGTGGGTAGG
O1	ATGACGACCGGCACCGGGGCCACCCGGGCCGCCAAACGCGGGAAGGGAACATAA	GTCCTGTCTGCAAGG
O1	ATGCACCAGGACTGCTGGGGCGCGGCGTATACCAAACGCGGGAAGGGAACATAA	CATCAGTTTGTCGGC
O1	ATGGTCGCAGCACCCACGCTATGCGCTCATCTGAAACGCGGGAAGGGAACATAA	GACCGACCCGCCAGG
O1	ATGAGAAAACCTAGCCTAAAATTGCCGCACTGAAACGCGGGAAGGGAACATAA	GGCACAGCGGGCCGC
O1	ATGCGCGCCCCCACGCTCAAGCCATGCGGCGGGAAACGCGGGAAGGGAACATAA	GCCGCGAGCCTGGAG
O1	ATGCCCCCCGGTCGTAGGAAACGCATTGCACACAAACGCGGGAAGGGAACATAA	CCTACGCCCATTTCA
O1	ATGCCTCGTCTGGCGCCTGCGTAGGAGGTTACGAAACGCGGGAAGGGAACATAA	GTGGCGTGTTGTCTG
O1	ATGCCCGGGCCCACAAGGTCCGTGGCCCGACAGAAACGCGGGAAGGGAACATAA	GCTGGCGGTAGGGTC
O1	ATGCGAGCCTATCTTCTATTCGGCTGTACGGCGAAACGCGGGAAGGGAACATAA	CCCACGGTGGCCGAC
O1	ATGTCGCATAGCCTTGCCATATGTTTATGGATTAAACGCGGGAAGGGAACATAA	CCGAGCGTGGCTGCA
O2	ATGGCCACGCGCCCGCGGGTGCCTGAACATTGCAAACGCGGGAAGGGAACATAA	CGTAGATAACGGAGT
O1	ATGGTAGGGACGGCGTAGATCCCGGGGGTGCCAAACGCGGGAAGGGAACATAA	GGGGCGTCTCCGTCC
O1	ATGCGCTGGCTTCGACGTGACGCCGCACAGCTCAAACGCGGGAAGGGAACATAA	CCCTAACTCCGGGTG
O2	ATGGACCCCACGGGGTCTCTCTCAAGTGTTCGTAAACGCGGGAAGGGAACATAA	GCGCGCCCGGGACGG
O2	ATGGCGCCTCAGCTTCGCGCCACTCCGGCCTAGAAACGCGGGAAGGGAACATAA	ACGACTGGTCAGG
O2	ATGGGACCGCACGCCGGATGGCGGTTCGGACTGAAACGCGGGAAGGGAACATAA	GAGCAGCCCCGGACG
A2	ATGTTTGAGAGGCGGTCAGGTACACTGGATCCCAAACGCGGGAAGGGAACATAA	CGGGGGGCAAGGGTC
A2	ATGGGACTGATCCGGGGACACGTATCCGCGCGTAAACGCGGGAAGGGAACATAA	TGGGCAGCAAGGGGG
A2	ATGCTGCAAAAGGGGCAAGGATCGGGGGCGCCTAAACGCGGGAAGGGAACATAA	ACGGATGGGGGCTGT
A2	ATGGGCGCTCGCCGCGCTGGGTAATTTAACCTCAAACGCGGGAGGGAACATAA	GGTGAGCCCCCAGAG
A2	ATGGTCCAATCTGAGTTTTAAAATGATGACCGGAAACGCGGGAAGGGAACATAA	TGCGCACGCAGCATA
A2	ATGTGTTTGGATCCCAGTGGGATACATTATCTGAAACGCGGGAAGGGAACATAA	CCCAGCGGGGGTCCC
A2	ATGTCGCGGAAGCGTATGACCGCATCGGATGTGAAACGCGGGAAGGGAACATAA	GGCCGGCGCCCACAA
A2	ATGATTCTTGCCCGGGCCTGAACGGGCCTCGCTAAACGCGGGAAGGGAACATAA	ATCCTTTGATGGTAA
A2	ATGTCGGGGGTGGCACGCCATCGTCCCGCACACAAACGCGGGAAGGGAACATAA	CGGGAGTGCGCGGG
A2	ATGATTGAGATGGGGTCGGGAACCCCAGTCTTCAAACGCGGGAAGGGAACATAA	CGGCCACCCGCGGAG
A2	ATGTTGTCGTGGTCGTCAGACATTGTCCTCACTAAACGCGGGAAGGGAACATAA	GCCGCTAACCGCCCC
A2	ATGTTAAAGGGGCCGTCCTTAGACGCCGGGTCCAAACGCGGGAAGGGAACATAA	GGTCCTACGAGGC
A2	ATGTGATAGCTCAGGTGGACACATCAGCGACCGAAACGCGGGAAGGGAACATAA	GGGAAGGGGCAAAA
A2	ATGTAAACGACACGCCCACACCACCGTTCCCCAAACGCGGGAAGGGAACATAA	GAGCACTCGGGCGCA
A2	ATGACTGTTATGCGGGCGCGAAACGGGAAGGGCAAACGCGGGAAGGGAACATAA	GCGGCGCGTGCTGTG
A2	ATGGGTTGTAATTAAGAGCGGGACGCGGCCGTCAAACGCGGGAAGGGAACATAA	TGTACGCGAAACA
A2	ATGGCGTTGGTCCCGCCGAGCGATACCGCTGGCAAACGCGGGAAGGGAACATAA	CTGCGGCGGATGCGT
A2	ATGGAGATGGGCTGGGTACGCTGTAGGGAGCGCAAACGCGGGAAGGGAACATAA	CGGCCGGGTGCCGTG
A2	ATGGTACACATCAACCCGTGAACAGGCCCTTAGAAACGCGGGAAGGGAACATAA	CATGCGCCCGGATAG
A2	ATGTACTCCTTCCAGCTCCAGCCCGCCCTCTAAACGCGGGAAGGGAACCTAA	AAACCGGCCGGACAA
A2	ATGGGTGATTACGCGACTACGCAGGCGTCGCGCAAACGCGGGAAGGGAACATAA	GGGCCGCACCCCGGG
O1	ATGTAAACCCTGCGCTCCTGCTGCGGCGACGTCAAAGCGGGAAGGGAACATAA	CGGCAGGGGGGCTGG
O1	ATGCCCAAGGCACGCCGCCGATGCATGTAGTCCAAACGCGGGAAGGGAACATAA	ACTAGGACCCCCATC
O1	ATGCGCTCGAGTCGCTGGCTCAACAGGCCGGGTAAACGCGGGAAGGGAACATAA	GGGGCGGGGCGCCGC
O1	ATGTCCCCTGCCGGGGCGACGGGCAGTCGTCCCAAACGCGGGAAGGGAACATAA	GAAAAAGCGATGTCG
O1	ATGAACACCGGGAGGCCGAGCGCTTCAGGCTAAAGCGGGAAGGGAACATAA	CGAAAGGTTGGAGGC
O1	ATGTGAAATGGCACATGTCCGCAGCGCAGCGTCAAACGCGGGAAGGGAACAAA	ATGTAAATCCCCGTC
O1	ATGGGGTCGCGTGTGCTCTCGGTGAGGGTTCGCAAACGCGGGAAGGGAACATAA	GGGCAGAGTCCGAAG
O1	ATGGACTCCTCCAGTTCTCGAATTGAGTGTTGCAAACGCGGGAAGGGAACATAA	GGGGTCACTCGCTCG
O1	ATGCCCTGCGGTGTACCGGCCCGGCCCAGGTGAAACGCGGAAGGGAACATAA	GCGGCAGGGCGCCGC
O1	ATGTGGATTACGCGCGTGCCCCTTGGCGCGCTTAAACGCGGGAAGGGAACATAA	CCTGGGGGGCCTGTG
O1	ATGGGCGTGTACACCGCGCGGGGTCCAACTATGAAACGCGGGAAGGGAACATAA	GCGCGGGGCGCCAAC
O1	ATGCTCGCTCCCATACGCGCTCTATTGTCCGTTAAACGCGGGAAGGGAACATAA	CCTGGGCCCGTGCAC
O1	ATGCGGCCGCTTCTTCACGCCAATCCACAATACAAACGCGGGAAGGGAACATAA	AGTGAGAGGCCGCCC
O1	ATGTACTCACAAATGCTCGCCGCTTGCGTCAGCAAACGCGGGAAGGGAACATAA	CACCGATTTTGAGCT
O1	ATGATTCAATTTATTGATCAGGAACGTAACGCGAAACGCGGGAAGGGAACATAA	GGAGCAGCGGGGGTT
O1	ATGCGAGTGCCTCCGTGACGGCCCGGCTCCACCAAACGCGGGAAGGGAACATAA	TGGACTGGGGGCCGC
O2	ATGCCGCTGGCCCGGCGAGCACCATACCGCGCTAAACGCGGGAAGGGAACATAA	GACCCGGGAGGCTCC
O2	ATGCTGTGCGCCCGCTCTAATTAGCTATAACGGAAACGCGGGAGGGAACATAA	GCTCCGGCTGCACGC
O1	ATGGGCGCCCCGCCCTTGATAAGCTTCCAGACCAAACGCGGGAAGGGAACATAA	CGGGAACCCGTACCA
O1	ATGCCTTCGGGGGTCCTCCTTGCACGCTTCCGCAAACGCGGGAAGGGAACATAA	GCAGCCGCCATCCTG
O1	ATGCCCATAGGCGAGCTGACGCTAGAGATGCGGAAACGCGGGAAGGGAACATAA	TACCGTCCCGACTAG
O2	ATGGAACACACCCGCTACGGAGGGTGGCTCGGCAAACGCGGGAAGGGAACATAA	AAAGTGCGGCACGGG
O2	ATGCGTCTTCCTTTTGCTTAACTTTACCAGGCACGCGGGAAGGGAACATAA	GTCAGGAAGCGTGCG
O2	ATGCCACCTTGCTCGGAGACCTCCCGGATCCACAAACGCGGGAAGGGAACATAA	TTTCGCGTCCGTGCA
O2	ATGCCGCAGTTATGTGCCACTACCCCCAAAAGCAAACGCGGGAAGGGAACATAA	CTCTGAAGGTGC
O2	ATGCCCATTCCTGTCACTCGGCGGGTCTCCCGTAAACGCGGGAAGGGAACATAA	GGAGCGTGGACGCGC
O2	ATGGCGCTTTACCGCCGACCGACCAGCTACCGTAAACGCGGGAAGGGAACATAA	CGTGCCGTACGAAGG
O2	ATGTCATCGCCCCGGCCAGAGGGAGGACTTCACAAACGCGGGAAGGGAACATAA	GTCCTCACGCAGGGG
O2	ATGCCCGTCATCGGAGTCGCCCATCCTTGCGCCAAACGCGGGAAGGGAACATAA	TTGTGTCCGGC
O2	ATGATATGGCCCCTGCCGGTTCGCCATATAAACAAACGCGGGAAGGGAACATAA	CCCACGTCCACCAAC
O2	ATGGTACGGACACGGTGAGCGCGGGTCATGGGAAACGCGGGAAGGAACATAA	TAAGGCGGCACACC
O2	ATGGGACAGCTGCCTCCTGGCCGAGCTGTTGGCAAACGCGGGAAGGGAACATAA	CAGGAGGCTACGTGG
O2	ATGTGTTGTCAGCAGCCGGGGCCCGGTTTACGCAAACGCGGGAAGGGAACATAA	GGGCTACGGGGAGGG
O2	ATGCCCTGTGACACGCCAAATAGGCCCCTATGCAAACGCGGGAAGGGAACATAA	CGGTTGACTACACCA
O2	ATGGGCCCGTCCCACCGCGATATCGCTTCCCACAAACGCGGGAAGGGAACATAA	GATGCATGGGTAGGC
O2	ATGTGCATCAGATAACCGCTGCACCTCCCCGTTAAACGCGGGAAGGGAACATAA	AGGACGTCGTAGGAC
O2	ATGCGTCGTGCTTCTCCCCGCCCGGGGTCGACGAAACGCGGGAAGGGAACATAA	GCGCGGACGAGGTAT
O2	ATGCGGCGGCCGCACCGCCTGTAGTTGTTTTGAAACGCGGGAAGGGAACATAA	GACCGCCGTGAGGGC
O2	ATGGGCTCGCTACGCCCCCCGTGTGCGTCCCGTAAACGCGGGAAGGGAACATAA	TGGCCAGGGGGCAGA
O2	ATGCTCGGCGCACCATGCTCGCCGCCGCCAACAAAACGCGGGAAGGGAACATAA	CGCAGATGTTTCGCA
O2	ATGAGTCCTCCTCAAGTAGTACTACGCCCACTGAAACGCGGGAAGGGAACATAA	GCGCGAGCATTGGAC
O2	ATGATCCCATAGCGGAGTCCCCTCCTAGTGTCGAAACGCGGGAAGGGAACATAA	GGCGAGCTAGTTCAC
O2	ATGCCGGCGGTGGGCGAGGCACCAGGTCCCCGGAAACGCGGGAAGGGAACATAA	GGACGGGGCACGAGG
O2	ATGCATTTCGACGAAGTATTCTTTAAGGCTAGGAAACGCGGGAAGGGAACATAA	GTCTCTGGACAGATT
O2	ATGACCTAGCTCCGGGAGCGTACTGACGGGCTCAAACGCGGGAAGGGAACCTAA	GGGTGGAATGGGCCG
O2	ATGCGTACCTCGCCGGCTACCGGGCCAGTCAGCAAACGCGGGAAGGGAACATAA	CGGGAGGCGTGGCCG
O2	ATGTAAGACACATCCAGTTTACACACGTAGGTCAAACGCGGGAAGGGAACATAA	GCCATGAGGGGCCAG
O2	ATGCGGATCCTGATAAGGTAGTACTTACGTGTCAAACGCGGGAAGGGAACATAA	GATGGGGGCCCGTGA
O2	ATGGTCTCTTGGGACGGGCGGCGGCACAAGCTGAAACGCGGGAAGGGAACATAA	GACGGGGGTCGTCCC
O2	ATGGTGGCTACCGTCGGGAGTCAGTGAGCTTCCAAACGCGGGAAGGGAACATAA	CTGGACTGAGGCTGA
O1	ATGAGGTCAGCGGACACACCATGATCGAGTGCCAACGCGGGAAGGGAACATAA	GATGCCGCGTTGTTA
O1	ATGCGCCTCTACAGCGGTCACCGGTCTCGTCCTAAACGCGGGAAGGGAACATAA	GGGCAGGGGCGCGGT
O1	ATGCCTGCCCGAAAACCTGGGGGACCCTGCCATAAACGCGGGAAGGGAACATAA	TGGACGCGGGTTGT
O1	ATGTCGCGACATTTAAGTATCTCTCTTATGCACAAACGCGGGAAGGGAACATAA	GCCTGTTGGGTGCTC
O1	ATGGCCGTTGATCGGCCGGCCATAGGTTAGCGCAAACGCGGGAAGGGAACATAA	GACTTCACCCTGCCT
O1	ATGACGCTTCATCCGGGGGACCCGGTGCAAGACAAACGCGGGAAGGGAACATAA	GTCACCCGGCGGTTG
O1	ATGGCGGCCCCCGCCTTCTGGTGACTAGCCTCGAAACGCGGGAAGGGAACATAA	TTGCGTGACCTCCTA
O1	ATGCCCAGCACTCGGTCGCCCCCTCGAATCCTTAAACGCGGGAAGGGAACATAA	AAGCGGGCGGCCGCT
O1	ATGACGGGGTGATCCACGCACGGTGGCTCGCGTAAACGCGGGAAGGGAACATAA	GGCGGGGCGGGGCTG
O1	ATGGAACACTCCCCGCCGTACGCAATCGTTAGGAAACGCGGGAAGGGAACATAA	GACTGACGTAAGCAA
O1	ATGCTTCCCGCCGACCCTCAGGGCGCCCGACGGAAACGCGGGAAGGGAACATAA	GCCGTGGGCGTCCGA
O1	ATGAAGTTGGCGATATTACAAGACCGGGTACTCAAACGCGGGAAGGGAACATAA	GAAGGACGGGGGCCC
O1	ATGGAGGCCGTCCGTTCGCGCAGGCCACCCCGCAAACGCGGGAAGGGAACATAA	GGCGGGGGACGCCGC
O1	ATGGGCCGCTCCGTCTTTCGCTCTGTTCACCCGAAACGCGGGAAGGGAACATAA	GCCGCTCGCGATCCA
O1	ATGCAGGCACCGAGTGCGCTGGCGGGCCTTAGGAAACGCGGGAAGGGAACATAA	GATGTATTGATCAA
O1	ATGTTGCTTCCCAACGGCCCCGCTGCCAGGAATAAACGCGGGAAGGGAACATAA	GAAGGGCGGAGCCTT
O1	ATGGTGCCTGCCTGGGCTCCCGGTGGGTGTCCCAAACGCGGGAAGGGAACATAA	TGACGTACCGGGCC
O1	ATGTCCTGCGCCGACGGGGCCCCCACGGGCGGGAAACGCGGGAAGGGAACATAA	GAGCGGGGGCGGCCA
O1	ATGGTGGTGTCCCAGCCCGGAGAACGTCGCCTTAAACGCGGGAAGGGAACATAA	AATCATCCCGCATTC
O1	ATGGCCGCGGGCGGGCCCGCCGCCTGCCCGTGCAAACGCGGGAAGGGAACATAA	ATGGGTAATCATTAG
O1	ATGGCGCGGCGCAAACCATCACGGCATCGCTCCAAACGCGGGAAGGGAACATAA	CGACCCACGGCCGCT
O1	ATGTCGCAGCTCCGCGACCGGCAAAGATTTTGCAAACGCGGGAAGGGAACATAA	GGGCGCAGGGGGGCG
O1	ATGGCAATCCAAACCACCTGGGCGATTCAGTCGAAACGCGGGAAGGGAACATAA	AGTTAGCTCGCACGA
O1	ATGTTAACGTTGTATCTGTAGCCCGACGAGAGCAAACGCGGGAAGGGAACATAA	AAGACACAAGGCACG
O1	ATGGGCGTATTCCCCGAGTTCGCCCGCGCCTTCAAACGCGGGAAGGGAACATAA	GTGACAAATCATCTC
A2	ATGAGATTAAAGTCAAGACTGTCAGTCGAGCTGAAACGCGGGAAGGGAACATAA	GGGCCACGGGGCGGC
A2	ATGATCCGGTGGCCGGCAGGTCTGCCAACGCGCAAACGCGGGAAGGGAACATAA	CCCGGGGGGAGCGCG
A2	ATGTGATGGAAGCGTAACGCGGGCATCTCCCGTAAACGCGGGAAGGGAACATAA	CCGGTGCCCGGGGGG
A2	ATGTAGCATTGGAGGCTCAAAGCCCATGCCGCGAAACGCGGGAAGGGAACATAA	AGGAGGCGGGCCCCT
A2	ATGGTGGAGGGCCGGTACACGTCGGTCCAAGAGAAACGCGGGAAGGGAACATAA	CCGGAGTGACATTCG
A2	ATGTTGTATGACGCGGGATGGCGTATCCTCCGCAAACGCGGGAAGGGAACATAA	ACATCGTGGGTTATC
A2	ATGACGAAATCCCTAACCTATAGCCATCCACCCAAACGCGGGAAGGGAACATAA	TACGAGCGTGCGCAG
A2	ATGGAAGCGCGGCGCGGAGTGTGGCCCAACCGCAAACGCGGGAAGGGAACATAA	CGGCGCGGAGGACAA
A2	ATGCGGGTTGTACCGCGGGAGAGAACAAGCCGGAAACGCGGGAAGGGAACATAA	GCAGAAGCGGGGCTC
A2	ATGTTAGGGGGCCTCGGCCGTGTTGCGTCTCTTAAACGCGGGAAGGGAACATAA	AGAGGGCGGTGGCCT
A2	ATGACAACAAACAGCATACCACGACAGGGGCGGAAACGCGGGAAGGGAACATAA	CTCGGGCGAATCGTG
A2	ATGCCAAACAACCCAGGTCAGTGCACTCTAGTAAAACGCGGGAAGGGAACATAA	GCCTGGTACGTACAG
A2	ATGTGGGTGGACGGCCAGTGAGAGGCGGCCATTAAACGCGGGAAGGGAACATAA	GGCACAGAGGTGAGG
A2	ATGTGTTGCTTCGCGTTTTAGGGACCCGCGTTCAAACGCGGGAAGGGAACATAA	TGGCTGGGTTCCGAT
A2	ATGGTGCAGGGTTCGAGAGGGCGCGCAACTCGCAAACGCGGGAAGGGAACATAA	ACGAGCGTTGGCAGG
A2	ATGGTTCACACGGACCGGGAACATCCTTGCGTTAAACGCGGGAAGGGAACATAA	ACCGCGCCACCTGAA
A2	ATGAGGCGACCTTCGTCAAGGACGTCGGAGGTGAAACGCGGGAAGGGAACATAA	GAGCTGCTAGCGCCG
A2	ATGCACTTTCGGTAATGAATAACCAGCACAGGGAAACGCGGGAAGGGAACATAA	CAGCGAGGGTTTGAG
A2	ATGTGAAGTCTTGTCTAGGGGATTTGGTGGGGTAAACGCGGGAAGGGAACATAA	ATCTCTGAACCGCGC
A2	ATGAGTTGACTGAAGTATGTATCGCTGGACGAACGCGGGAAGGGAACATAA	AAAGGTGGCCGAAGT
A2	ATGTGTGGGTGGACGGCTGGGACTCGCGGCGCCAAACGCGGGAAGGGAACATAA	TCGGGGCAGGCGGCC
A2	ATGATAAAAAATAACACGCCCCCGAGCCGGGTGAAACGCGGGAAGGGAACATAA	CAGGCCAGCCCCGAC
A2	ATGGGGGCGCGCCCGACGCCGAGGCAGCCCGACAAACGCGGGAAGGGAACATAA	GAAGGGGCGGCGCC
A2	ATGCCCACAACACCCGCCTAAAACAACGCCCCTAAACGCGGGAAGGGAACATAA	AGTTGGTGCTCACAA
A2	ATGCTATAACATACCGAGGACACGTTGCAGAGCAAACGCGGGAAGGGAACATAA	GTGCCCTAGGCCCCG
A2	ATGGGGGTGAGGTCAGAGAAGCACGCGGCCCGCAAACGCGGGAAGGGAACATAA	CGTCGCCCCTCCCTC
A2	ATGCCCCAACCACGCCAGACCCGCCGCTCACTCAAACGCGGGAAGGGAACATAA	GTGCAGTGCCCCACG
A2	ATGCTAATAAACCTAAGGGAGATGCCCCTTCTCAAACGCGGGAAGGGAACATAA	GCCACACGGTCGGCT
A2	ATGTGTCGCGTGGCCTCTGAACAGTTCCGCTGAAACGCGGGAAGGGAACATAA	GAAGGGGGCGAGACC
A2	ATGCCTTCTGGTCCCACGGGCGGTCCAGGAAAAACGCGGAAGGGAACATAA	CGGCGGCCATGAAAG
A2	ATGGCGATGCGTCGGCGGACCGGTGTCCGCGGCAAACGCGGGAAGGGAACATAA	CTCCGCCGGGCAGGG
A2	ATGAACAACAGCTCAAACCGCCCACACGCCCCCAAACGCGGGAAGGGAACATAA	CAGTGGCCGCCCGTG
A2	ATGGGGGCCCATCCATGGGTATATTCCTCGCGCGGGAAGGGAACATAA	GGAGGGTGTCACGGC
A2	ATGAACCGCAGTTAAGCGTGTAGTCCGACGCCCAAACGCGGGAAGGGAACATAA	CGACGCCCCCGGCAA
O2	ATGCGCGAGGTGGCAGTTGCACATCGCCCCGCTAAACGCGGGAAGGGAACATAA	GCCCGCCGGCCCGAC
O2	ATGGCTCTAAGCCCTACGCTGATCATGGTGTGCAAACGCGGGAAGGGAACATAA	GACGGGAGCCATTTC
O2	ATGGCGGCCAGCCCGGCCGCTCGTCCCATGTTTAAACGCGGGAAGGGAACATAA	CGATCCAGCGCGCCC
O2	ATGCCCCCCGCCTCGAAGGCGGCACGTAGTCATAAACGCGGGAAGGGAACATAA	TAGATTGAACTTGGG
O2	ATGCCGCGAGCCGCTGCGACTCCAGCGTGCCGCAAACGCGGGAAGGGAACATAA	AATGGACGGCCGGAA
O2	ATGGAGAAAAAATTCGGCCACATCGCCAACCGTAAACGCGGGAAGGGAACATAA	TGCGCGGGTGTATGA
O1	ATGCCGTTCTCGGTGGCTTCCACTCTGCGAGCTAAACGCGGGAAGGGAACATAA	ATGGTAATCCCAGCT
O1	ATGAACGCCGCGAGGATTGCTGCCACCGAGTACAAACGCGGGAAGGGAACATAA	GGGGACGCTGCTGCC
O1	ATGCGATGGCTACCGAGTCTCGTCGGCCACGTCAAACGCGGGAAGGGAACATAA	GGGGGCGTAGCGTGG
O1	ATGGAAAGCTGTCACCCCGTGTCTGCGCCCGTTAAACGCGGGAAGGGAACATAA	AACCACGGCCAGCTT
O1	ATGCGTCACAGCCCCCGACCGGCAACCCGTCTCAAACGCGGGAAGGGAACATAA	AGCAACTTGTTCAGG
O1	ATGTCGACAAGGCCTCGGGGCAGCTTATCTCACAAACGCGGGAAGGGAACATAA	GACGGCGGACCTCAT
O2	ATGTTATACTGCCCGGAGCGGGGCGGCGTTGGCAAACGCGGGAAGGGAACATAA	CGAGAGAGTCTGGGG
O1	ATGCCTCCGCCTCATTGTCCATCTCCCAGGATGAAACGCGGGAAGGGAACATAA	TAGCCAGCTGTTTTT
O1	ATGACATCCCTTAGGCTAGGCTTTTAAAGCGGGAAGGGAACATAA	GGTGTTCTTCCCTTA
O1	ATGTCGCTCCCGATCAGTCATTTTAGTGTCAATAAACGCGGGAAGGGAACATAA	TCCCGGCGGGCACTT
O1	ATGACCCCAGGCTCTCTCCCGTGAAGTGCGGCCAAACGCGGGAAGGGAACATAA	CATCATGTTAGGCCA
O1	ATGCGATTTCCCACATAGACTTTCTGTCCGTTCAAACGCGGGAAGGGAACATAA	GTTGCGGCGGGACGC
O1	ATGTTAGGGCCCCCTCTTACTGGTGCTCCATTCAAACGCGGGAAGGGAACATAA	GGTGCGTCCGATGGT
O1	ATGCCCGGGGAACAGGCGTGCTCCGCGGTCTCGAAACGCGGGAAGGGAACATAA	GTGGTGGCCCGGAGA
O1	ATGCCTGCCCCCGTCGTCGGTACGCGGGTGTCGAAACGCGGGAAGGGAACATAA	CCAGGACTATC
O1	ATGTTCGCGTCCTTCCAGGCGCGGGCGACCGCCAAACGCGGGAAGGGAACATAA	CTAGGGGCGACGTGG
O1	ATGTGCCTCCGACGCCGCCCCACGGCTCACCACAAACGCGGGAAGGGAACATAA	AGTGTTAAAAGCCAC
O1	ATGCCCGGGCTCTGCCCGGTCAAAGCGTCCTTCAAACGCGGGAAGGGAACATAA	CGGGGGAATAGGCTC
O1	ATGCGGACGCCCTATTTTAGGCCGCGTCATCTCAAACGCGGGAAGGGAACATAA	GTGCACGGGGGGCGG
O1	ATGCAACACGCCTCCTTTCCTGTCCCGAAGAGCAAACGCGGGAAGGGAACATAA	ACCGTGGTCGAGCTT
O1	ATGGATGCTCGACTCCCTTGCGCACACGACTCTAAACGCGGGAAGGGAACATAA	GTTGTTCCTCTGGAG
O1	ATGGGGGCCGTGCCGGCGCCGCCCTCAGCGCCTAAACGCGGGAAGGGAACATAA	TCCAGCAATCCCTTT
O1	ATGCCCGGCCGTCCGCCGGGGCAGGACAAACTCAAACGCGGGAAGGGAACATAA	TCGGTATCACGTTCA
O1	ATGTCGCGTTACAGGTAACTCCAGCCAGGCCCGAAACGCGGGAAGGGAACATAA	GCCCGCGGGGCAGGC
O2	ATGAGAACAGCCTCCGCAGAATAGCCCGGTCCGAAACGCGGGAAGGGAACATAA	CGCATCCGAGCGATC
O2	ATGGCAAGATCGATTACGCGAACTAGGGCGCCCAAACGCGGGAAGGGAACATAA	GCAATAGGAAATGGG
O2	ATGTGATCTTCCACAGGGCAGCGGAGGCGGATCAAACGCGGGAAGGGAACATAA	TGCGGAGGCGGCCGA
O2	ATGTGTTATCAATGATTTCATACTGATACTTCAAACGCGGGAAGGGAACATAA	CGCCCAGACGCCGGG
O2	ATGCGCAGTACCTCTTGCCCATGCCACGGGGAAACGCGGGAAGGGACATAA	GGAGGCCCCAAGCAG
O2	ATGGACTGCCCGTGCACTAGAATGGGTGTGAGTAAACGCGGGAAGGGAACATAA	ATAGCGCCGATGGGA
O2	ATGTCCCACCCAGCCACTTTCGTCGCACTACTTAAACGCGGGAAGGGAACATAA	GCCTGCCGAGATTAC
O2	ATGCCCGCTGGTAATCTAGGGATCGTAATGCACAAACGCGGGAAGGGAACATAA	GCGTCAGCGGGGGC
O2	ATGCCGGCTGTCACATCCAGGCCCTAGGCGCCCAAACGCGGGAAGGGAACATAA	AGGCCCTGGTCCGCC
O2	ATGTACACGGCAGCATTTCCTGCTAAGGCACACAAACGCGGGAAGGGAACATAA	CTAACCGGGCCAACG
O2	ATGTCAGGGCGGCGCCGCGCTTGGGGCACTCCTAAACGCGGGAAGGGAACATAA	TAACACATCTCAGGA
O2	ATGCCCTCCGTAGCGGGTCCCGGCACCGCTCGGAAACGCGGGAAGGGAACATAA	TGCCCAACCTGAGAC
O2	ATGTACCACCGCGGCCGTCATCAGCCGAAACGCGGGAAGGGAACATAA	GCGAGGAGCGGTCTC
O2	ATGACGCACGGCGCGTCCCAACTTCGCGACGAGAAACGCGGGAAGGGAACATAA	GGGCCGGGCGACCGC
O2	ATGCTCGCGCGCCGCGACGGCACCGGCGGTGCGAAACGCGGGAAGGGAACATAA	TCGCAACGTAGATCA
O2	ATGAGCCTCGTCTTGCGCGGGCACCGCGCGCGGAAACGCGGGAAGGGAACATAA	GCCGCGGGTCGGCCA
O2	ATGCCGGCCGCAGGGCGTCCGCTCGCCCACTGCAAACGCGGGAAGGGAACATAA	GGGGCGACCGCGAGC
O2	ATGCCCCCGATCCACACGGGCATCCCGTCAGGGAAACGCGGGAAGGGAACATAA	GGAGGGCCGCGCACG
O2	ATGTTTTTCGGCGCCGCAACTTATGGTCCGCATAAACGCGGGAAGGGAACCTAA	ATTCGAGATGTGCGG
O2	ATGTCCACGCCCATGTGCCGGCCCGGGTGTGCCAAACGCGGGAAGGGAACATAA	GACGGGTGCGCGTAC
O2	ATGAGACCTTTGAAACCAGATACCGGCCTTGATAAACGCGGGAAGGGAACCTAA	ATGCACGAGCATGGG
O2	ATGTAACCTGACCATATTTGCGGGAACGGCCTCAAACGCGGGAAGGGAACATAA	TTAGAGCTGGCAGGA
O2	ATGCGTCTACGCTCAAACGCTCAGAATGCCCAGAAACGCGGGAAGGGAACATAA	TTCGCTGCGCGGGAG
O2	ATGGTCCCGTCCGTTCTTACCAACTGTATGGATAAACGCGGGAAGGGAACATAA	GGGGCCCGGGTCCTC
O2	ATGGACCCGCGTCCGGTTGAGCCGACTCTTTTGAAACGCGGGAAGGGAACATAA	GGGGCAGCGCTGGGG
O2	ATGTAACCATAGTGCGCCCGATCTTAGTTGAGGAAACGCGGGAAGGGAACATAA	ATTCTTTTTCTTTTC
O2	ATGATAACTAACTACGCCGAAGGACTCGCAATTAAACGCGGGAAGGGAACATAA	TTACCCGCCGAAGGA
O2	ATGCCCCTCTAGAGCGACACCCCCCGCCGCGCGAAACGCGGGAAGGGAACATAA	CGGGGATGGAACGAG
O2	ATGTCGGCGGTGGGTAGCAGCCGACTCTCGCATAAACGCGGGAAGGGAACATAA	GTCAGCGCTGGGACC
O2	ATGCGCGGCGCCGCTCACGCTGTCCCAACCCATAAACGCGGGAAGGGAACATAA	CACACAGAGTAGATG
O2	ATGACTAAACAAGAGCGGATGCCCTTGTACTCGAAACGCGGGAAGGGAACATAA	GTGCGGAGGGGGAGG
O2	ATGGATTGGGCAGCTAGGGTGCCCACCCACCGCAAACGCGGGAAGGGAACATAA	TGTGGATAACATCGC
O2	ATGCTCCATTATGGGGACACCAGGGAACCTGGCAAACGCGGGAAGGGAACATAA	CTCTCCATTCCGGGC
O2	ATGTTTCTTTTTTACGAAAGGGTCGCCCCACCGAAACGCGGGAAGGGAACATAA	GACAGACAGGTCTCG
O2	ATGCTCCGTGTTCAAGGGCCCGCTTGGCGGTCCAAACGCGGGAAGGGAACCTAA	GCCGCAACTGGCCGG
O2	ATGCTCCTACATTTCAGTACCAAAAACTGCCTGAAACGCGGGAAGGGAACATAA	CGCGTGGGGCCGGAC
A2	ATGAAATATAAGGGATAAAGGCAGGGCTCGGTTAAACGCGGGAGGGAACATAA	AGGGGAGGCCTGGCC
A2	ATGGTTCGAACCACTGCGAGCCAATAGTCTCTGAAACGCGGGAAGGGAACATAA	GCACCCCCCAGGGGT
A2	ATGTCACACTAGGAGACAGGCTGCCCCCCCTTCAAACGCGGGAAGGGAACATAA	GTCGTCGACCATCG
A2	ATGCCCGATAAGTCACCAGCACGGCTCGGCATTAAACGCGGGAAGGGAACATAA	CGCCGGCCTTCGGCG
A2	ATGATTGTGGTCTCCGTAAGGAGTACGCCCGTGAAACGCGGGAAGGGAACATAA	GGCGGCCCCGGGCAC
A2	ATGCTCAACAGGGAAACAAACACCCCCTCCGAATAAACGCGGGAAGGGAACATAA	TTGAAGTCCATCTGC
A2	ATGAACCACCACGGACACGCCACCACAGGCGCGAAACGCGGGAAGGGAACATAA	GGCTATCTGCGGGGG
A2	ATGGTTCACTATCTCGGGGCAACCGCGGCCGCCAAACGCGGGAAGGGAACATAA	GGGGCAGCCGCCTCT
A2	ATGTTTAGTAAGCTCCCTCTTTCTCACGCGGGGAAACGCGGGAAGGGAACATAA	CCGCAGAGTTCCAGG
A2	ATGCCACACCGCCAACACCCCCCCCGTTAGGTAAACGCGGGAAGGGAACATAA	CTGCGCGGCGGTCGG
A2	ATGATAACCACGGAAACACCCAAGCATCACCAGAAACGCGGGAAGGGAACATAA	CGCGTCCGTCGAGGG
A2	ATGGCTGACGAGCCCGCAGGCCACTGCGCCCCTAAACGCGGGAAGGGAACATAA	CAGGCCGACCAAGAC
A2	ATGACATTGATATTGGAGCAATGCGCGCCGAGTAAACGCGGGAAGGGAACATAA	CGCCGCGACGGGGCC
A2	ATGAGTTGCTTTTTGTTGTAGTCACTCGTCCCGAAACGCGGGAAGGGAACATAA	AAGGGGGCAGGGCCG
A2	ATGACAAACAAAAGGCACCCACACAACCCCCCGAAACGCGGGAAGGGAACATAA	CTGTGTGCGTCTCCA
A2	ATGTGGGGGAATGAGACCCATGAAAAGGCTTTAAAACGCGGGAAGGGAACATAA	CCAGAAGGGCTCTCT
A2	ATGTCAACGAAACCCAATCGACCAAAGTCCTCCAAACGCGGGAAGGGAACATAA	GAGGCCCCAATACCT
A2	ATGAGGTCGAGGGACGCGGAGATCCGGGAGTAAACGCGGGAAGGGAACATAA	CGGGACGCGGGAGAG
A2	ATGTGGGAAATCTGAGCAGGGGCCGGCGGGCTTAAACGCGGGAATGGAACATAA	CGGCGTGCTTGTTGT
A2	ATGATCCACCGCACTTTCACACACGCCGTCTCGAAACGCGGGAAGGGAACATAA	GCTCAACGAGGAGGC
A2	ATGTGATAGACGGTATCGCGGACCGGCGCCCGGAAACGCGGGAAGGGAACATAA	GGGTGGGTGTGTGCA
A2	ATGATATACTACTGGCAACCCGCTGATTGGTCTAAACGCGGGAAGGGAACATAA	GCTGCCCGGCGAGCC
A2	ATGTTCTAGATCCTTTTTGCTCACGACGATCGCAAACGCGGGAAGGGAACATA	GTGCCCGGCGCGGTG
A2	ATGGAGGAGACGAGCTAAGCAGAGGGCCACCGGAAACGCGGGAAGGGAACCTAA	TGGCCGCGGCCGCCG
A2	ATGTGCGACAGTTCTGGACAGGACCCCACGCTGAAACGCGGGAAGGGAACATAA	AAGTCCACGGCGGAC
A2	ATGTTAGATATAAGCTGATGGAAACTCACCAGAACGCGGGAAGGGAACATAA	GCGCCGGAGTAAGGG
O1	ATGGGGTCCCCGCAGCCAGTCCACCGCTCCGTTAAACGCGGGAAGGGAACATAA	GAGTATCCTTCGTAC
O1	ATGCCCCCGACGCCCTTGCTCGCATGTCCCCCCAAACGCGGGAAGGGAACATAA	AGGGCCACAGCGCAC
A2	ATGGGTTTGGGCGGAGGGCCCCCCCGCTCCCGTAAACGCGGGAAGGGAACATAA	CACCGCCAAATCAGT
A2	ATGGTAGGGGGCCAGGCCCTCTAAACTATGTGGAAACGCGGGAAGGGAACATAA	ACGCGGGAGAATGCA
O2	ATGAAGTCACCCGCTATGGCGGCCGGCGCGCACAAACGCGGGAAGGGAACATAA	GACCCTATGTGCGG
O2	ATGCCTTCTGGGGGTCCGCTCGCGGACCCGTAAAACGCGGGAAGGGAACATAA	CGCGACGGGCCGCCG
O2	ATGGGACACTCCCGCACCGGATTTAGGCGGCCTAAACGCGGGAAGGGAACATAA	TCAGGGTGGCAGCGG
O2	ATGAGTCACCCTCCGCCCAGCACGTTTTGTCTCAAACGCGGGAAGGGAACATAA	GGCCGCCACGGGGGG
O1	ATGGGACCTGCCCGTCTCGGGGCCACGCCCACCAAACGCGGGAAGGGAACATAA	CCGGGCCCGCATGAG
O1	ATGTGCCCGCGTCGTCCCATAAGGGTGCAGGGTAAACGCGGGAAGGGAACATAA	TCGCAGTGCCCTATT
O1	ATGGCTCCTGCAATACGTACTACTTTCTCGAGCAAACGCGGGAAGGGAACATAA	GGACTGTTCTCGGAA
O1	ATGTGGCGCACCGGCATTGCGAACCGCCCTCTCAAACGCGGGAAGGGAACATAA	CCTGGGGACGTGTCG
O1	ATGACCTCCGGGTAAAGTTCGACGTTCTAGGCGAAACGCGGGAAGGGAACATAA	GTTTGCGGGATTTTG
O1	ATGCCGCCGGCGGCGTCACATCTCTCTTCCTCGAAACGCGGGAAGGGAACATAA	GTGGGGGGCGCGGGG
O1	ATGCCGGCTCGGTAGCCCCGACTCCCCGTTATCAAACGCGGGAAGGGAACATAA	TAACGCCGCCGTGTG
O1	ATGTGTAGGTTGACCTTTGGCCGCGCTGTTCCCAAACGCGGGAAGGGAACATAA	CACGGAAAGCTGGTG
O1	ATGCCCGACGGCGCCCGCGTCCAGGCGACCACGAAACGCGGGAAGGGAACATAA	GTCGTACCGCGTCCT
O1	ATGTGCCAATACACTTGCCCCACAGATTGAGCGAAACGCGGGAAGGGAACATAA	CCGGCTATTTGTGTA
O1	ATGGGGGCGTCGTCCCTCGCGCTGGACACTCCACGCGGGAAGGGAACATAA	GAGGCGGCCGGGCCA
O1	ATGGGTCATCTGGCATTGGTACTCACCCCACGCAAACGCGGGAAGGGAACATAA	CCCGGGCGGATGCTC
O1	ATGCCCACCGTCCTGGTCTCGACACTCACCGTCAAACGCGGGAAGGGAACATAA	GGAGGGCGACGGCCT
O1	ATGTCCCCAGGGTGTGTTGCTTCCGCCTCATTCAAACGCGGGAAGGGAACATAA	AAGTAGAGGACTACC
O1	ATGTGACAACTTATGTCTCTGGCCCCACACAGTAAACGCGGGAAGGAACATAA	GCGCCGGGAGGGGGC
O1	ATGGACCGGGCCAGTCCGGCCGTGCGCTGCATGAAACGCGGGAAGGGAACATAA	GGCAGGTGCGGTCCT
O1	ATGCGGCTCCCGCAAGGGGCCTGCTGAACAACCAAACGCGGGAAGGGAACATAA	TCCCGCGTGGTGAGA
A2	ATGAAAGTGGGTTGAAGACATACCCCCGTGGGCAAACGCGGGAAGGGAACATAA	GTGCACCCACGAAAT
A2	ATGGATTAGGTCCCATAGTGCTCGCCGCCGGCCAAACGCGGGAAGGGAACATAA	GAGGCAGGGGGTCCC
A2	ATGGGTGCGGTCCTCGAGCTGAGGACCGGAGCCAAACGCGGGAAGGGAACATAA	AGCGCCGGTCGGGGC
A2	ATGGCTGATATGATGTCTGTTGTTGAAGAGCTCAAACGCGGGAAGGGAACATAA	TTAATGGCGAATC
A2	ATGGGCTTGTGGTAGTTGCGGAGAGCGTAGGAAACGCGGGAAGGAACATAA	GAACCTGTATGAGAG
A2	ATGGGAAAGGGCGTTATTTTACCGTCGAACTCCAAACGCGGGAAGGGAACATAA	CCGTGGCACATCGAC
A2	ATGTTCCATCTGCTCCACCCCCCACCTGCTCTCAAACGCGGGAAGGGAACATAA	CGTGGGCTAACGCAG
A2	ATGATATTAATCGGTATGGTAGGGGCTGGCCTTAAACGCGGGAAGGGAACATAA	CGCCCAGGATGTAAG
A2	ATGCACCCAAACCCACCCCAACATTGCATGCTCAAACGCGGGAAGGGAACATAA	CCGCCTGCGGGACCC
A2	ATGTCAATCATGATTCCAATACGCCGCGCCGAGAAACGCGGGAAGGGAACATAA	CGAGGGTGGAGGAAA
A2	ATGCTAGCCCCCGAACACAAAGAGGAGGAGGGCAAACGCGGGAAGGGAACATAA	GAGTCGACGCACAGG
A2	ATGAAATTAGGCCTAATCGAACCGGGCACCCTCAAACGCGGGAAGGGAACATAA	TCAGGGGCTGGCGGA
A2	ATGTTTGATGGCAATTCACGGAAGGCGCATGCCAAACGCGGGAAGGGAACATAA	CGGTGCACGACAGGC
A2	ATGACACCACCCGGCCACCCCTTCCAGTCTCCTAAACGCGGGAAGGGAACATAA	CGGGTCCCCGACGGA
A2	ATGGCGTAACTTCGACGAGTGCAACGGCCGGTCAAACGCGGGAAGGGAACATAA	CCTCCTGCGACAGCC
O2	ATGAAAGCACCTACCCATCGATAGCCGCGCGCCAAACGCGGGAAGGGAACATAA	GTCGCACGCTGCGCC
O2	ATGCGGGGGTACCGACCATCTAGCGGACGCTCCAAACGCGGGAAGGGAACATAA	GGGAGGCGGGACGGC
O2	ATGTTCGCTTACCCACGCACGCCGACTGAATTTAAACGCGGGAAGGGAACATAA	CGCAGCAGCGACCGG
O2	ATGCCTGTTCCGGCGTGCCGCTTGCCCACGCGGAAACGCGGGAAGGGAACATAA	CTCGGAAGGTACCT
O2	ATGTAACCGCGTCGAGTGGAGTCTCTGGGCCTCAACGCGGGAAGGGAACATAA	CGAGAGGACCCGACA
O2	ATGCTCGGCGCAGGTACTACATCTTCCACAACCAAACGCGGGAAGGGAACATAA	TGGGAAAGCGAAGGA
O2	ATGGGTCCTGTGCGCTGACGCTGTTTACTGGTGGAAACGCGGGAAGGGAACATAA	GCCCAATGACCCTCA
O2	ATGTCAAATGCGTTTTATCCGCTCGTCTAGCCTAACGCGGGAAGGGAACATAA	GAGCCACGACGGAT
O2	ATGCCGTAGTACCCCAGGTCGGCGCCGCGGCCTAAACGCGGGAAGGGAACATAA	TGGGGGCGTGCACGC
O2	ATGCCCGGACGAGTCCTGCGCGCAAGCCGCATTAAACGCGGGAAGGGAACATAA	GGGGCGGCCGCGGGC
O2	ATGTGTAAGGAGACGGGAACCAGACGCGGGCACAAACGCGGGAAGGGAACATAA	GGGTCGGGGTCGGCA
O2	ATGCAAGGAATCAGTCGCGACGTACACTCCCCTAAACGCGGGAAGGGAACATAA	TGCCATTGGATGCCT
O2	ATGTTGACAAGGCCCACGACAAAGGGATGCAGGAAACGCGGGAAGGGAACATAA	TGCGGATTGACCGTG
O2	ATGCCCGCGGGGGACGATACGACCTCCTCCCCCAAACGCGGGAAGGGAACATAA	CGGAGACTTACGTGG
O2	ATGCGGCCTCCGACCTACTTAAAGCGCTGGGATAAACGCGGGAAGGGAACATAA	GTTGCGAAGAACGAT
O2	ATGTACGGTCATGGATCCCCGCGCTACAATATCAAACGCGGGAAGGGAACATAA	TACTGGAGACTGAGA
O2	ATGGGCCTCCGACCCACCATGTGCGTCCGACGGAAACGCGGGAAGGGAACATAA	CCCACCCGAGGGAGG
O2	ATGCTCGTCAGACAAAACCCCGGATAACGTCCCAAACGCGGGAAGGGAACATAA	AGGCCGGTCACCCGG
O2	ATGGGTCTCCTAGGCGCCTCGCCACCTACCCACAAACGCGGGAAGGGAACATAA	GCTATCAAGGGACAG
O2	ATGTGCACGGAGGCACAGTGGCGTCCCACTCTACGCGGGAAGGGAACATAA	CGCATATTCGCGCTG
O2	ATGTGAGCGTCACAATGTATAGGATTTGGGTAAACGCGGAAGGGAACATAA	GCATGACGCTCGCAG
O2	ATGCAGTACCGGCCCCGCTGATCCCAGGCCCGTAAACGCGGGAAGGGAACATAA	CTCACGCCCGAGCCC
O2	ATGCCCTGGTCGATCCAACGTGTCCGCCGTGGGAAACGCGGGAAGGGAACATAA	GGCAATCCCGCCGGT
O2	ATGGCACCTAGCCGGTCTTGGGTAGACCGGGGCAAACGCGGGAAGGGAACATAA	CAAGGCCCAGGGCTG
O2	ATGAACGACCACCGCGGTTCAACTTAGCCACACAACGCGGGAAGGGAACATAA	GGGACTGGAGCTAG
O2	ATGTTTGCCACTCCCCGGCGCCGCCTGTCCCGCAAACGCGGGAAGGGAACATAA	AGACGATACGAGTGA
O2	ATGCCTCCGGGCCCGCGTCCCCACGGACCGCACAAACGCGGGAAGGGAACATAA	ACGGAGGCAGTGGAG
O2	ATGGGCCCGGTCAGGCCCTAGCTGACCGCAACGAAACGCGGGAAGGGAACATAA	CCTGGATAAGCTGAG
O2	ATGCGCCCAGCGTCAGCTTCAGGAGTAGTTTATAAACGCGGGAAGGGAACATAA	CGTTGGGGACTCGCC
O2	ATGCGAGGTGTCGGGGGTCGTGTCCGGTTATTGAAACGCGGGAAGGGAACATAA	GACCCGAGGCGGCTG
O2	ATGACACCCAGGAGCCCTCAGTGGATGTATATGAAACGCGGGAAGGGAACATAA	AGGAGACGGAAAAAG
O2	ATGGAGGTCCGTCCGGCGGTACAGCTATGAGCGAAACGCGGGAAGGGAACATAA	TGAAAGGGATTCATA
O2	ATGGCGTACCCGGCGCCCTGAACGTCGGAGAGCAAACGCGGGAAGGGAACATAA	CTGCCAGCGAGCGACC
O2	ATGGCCGGTGTCATGGCCGGGCGGGGTGGGCCTAAACGCGGGAAGGGAACATAA	GGACAGAGGGGGTGC
O2	ATGCTCTTCTCTCCCCGTCCGGAGGTAGAGATCAAACGCGGGAAGGGAACATAA	TTACACTTTCGGGT
O2	ATGCGTACCCTCGGCTGCGTCTGAGGTGGACGCAAACGCGGGAAGGGAACCTAA	GCCGGCCCGTAACTT
O2	ATGGGCACCGAGTCCCACCGTTCTTCCTCCTTTAAACGCGGGAAGGGAACATAA	CGCCGGGCGTGTTGG
O1	ATGCCTCCCCCGCGCTTGAGCATCCACCCCATCAAACGCGGGAAGGGAACATAA	TAAAGTGCTATTTAA
O1	ATGTGGGCTGCGACTCACCGAGCGTCTAACGCCAAACGCGGGAAGGGAACATAA	CGTGTCCAGCTGTAA
O1	ATGTGATATCCACGCAGGCTTACGATAGGTCTGAAACGCGGGAAGGGAACATAA	GTAGAGCGTAGTTGT
O1	ATGATCTCGGAAGGTACCCGCCGGTTTCCACCTAAACGCGGGAAGGGAACATAA	GGAGAACCAAAGTCC
O1	ATGGCCCCGAGGGAGTAGGAGGCTCGTCATGGAAACGCGGAAGGGAACATAA	CTGGGCGCTGATGTC
O1	ATGTCGGCCTGGCCCCGACACACCCGGGCAAGGAAACGCGGGAAGGGAACATAA	TGGTTGAATATGGTT
O1	ATGACATCACAGAGTCTCTCCATGAACGAACCCAAACGCGGGAAGGGAACATAA	ATGATCCCGTTGTCC
O1	ATGGTTGTGTCACACCGTCGCTCCCATGAGAGCAAACGCGGGAAGGGAACATAA	AACTAGGCGGCTGTT
O1	ATGCGTGGCACCCACCAGTCTTGCCGGCCAGAGAAACGCGGGAAGGGAACATAA	ATGGAAGACGCCCGC
O1	ATGCGCCGCTCCACCCAACGCGTCGCCCGTATCAAACGCGGGAAGGGAACATAA	CTAGTTTTTCAATTG
O1	ATGCTGCTTACGCCCGCCAGCAGACTTCCCGTCAAACGCGGGAAGGGAACATAA	TGATAAATTGCATGC
A2	ATGCGTTGCGAACCTTGATCCTCCCCAGCCTCGAAACGCGGGAAGGGAACATAA	GCGGGGTCAGTTGCA
A2	ATGAGATAGGAGGGCAGACATCTGCCCGCGCCCAAACGCGGGAAGGGAACATAA	GCCGTGTTGATTTTC
A2	ATGTTGGAAGTCATACTAATAATAGGGGCCCCGAAACGCGGGAAGGGAACATAA	GGCCGCCAGGGAGCC
A2	ATGGAGTAACAGCAAGAGGCCAACCATCGCATTAACGCGGGAAGGGAACATAA	CGATAAGCGCCCTGA
A2	ATGCGCGATACCCCAGTTGCGCAGCAGAAACGCGGGAAGGGAACATAA	GGGCTTCGGCACACC
A2	ATGTAATATGCCAATTTAAGATGAGATCTCGCGAAACGCGGGAAGGGAACATAA	CGAGGACGATAAGCA
A2	ATGTGACTCCATCAAGACAGGACCATGGTAAACAAACGCGGGAAGGGAACATAA	GCAGTGGATCATCGG
A2	ATGATAGGGGTCGGGAGGGCGAGCGTCGTTCCCAAACGCGGGAAGGGAACATAA	CCGGACGCGCGCGGG
A2	ATGTAAGATTCAATAGGGTTTGGGCAGACGCCGAAACGCGGGAAGGGAACATAA	GCGTGCGGAAGGGGG
A2	ATGGGGCCGGTCGGTGCAGGCGCGGCCGCCTGAAACGCGGGAAGGGAACATAA	GGGCGGGGCGCGGCG
A2	ATGGGTGTACGGGGGATAGGACCCTCGGCCCCGAAACGCGGGAAGGGAACATAA	TAGACTGCAGCGGAC
A2	ATGCAGGCCGAGTAACGGAGACAGCGGCCGCACAAACGCGGGAAGGGAACATAA	GCCCGCCGGGTCGAC
A2	ATGCTGTGTATGTAAAATTTGTAAAGCCCACACAACGCGGGAAGGGAACATAA	TCCAGCCGTTCCCGG
A2	ATGGGTGTGCCGGCAGGGAGTAGACGCCCACCTAAACGCGGGAAGGGAACATAA	GGCCGCGGGACGGAG
A2	ATGCTACAAGATCGAGACCACACTCCTGTGGGCAAACGCGGGAAGGGAACATAA	CCACGATGTAGGTGC
O2	ATGCCAAGCCATGGCGGCCCTGGTTGCGTGGGCAAACGCGGGAAGGGAACATAA	ATGGCGGTTGATCCG
O2	ATGAACCTAGTTGTACCGCCCACCTCCACGGCCTAAACGCGGGAAGGGAACATAA	ACAAGAGATCACACG
O2	ATGAACTGGGCTCGGGCTGCCGACCGGCCGCCCAAACGCGGGAAGGGAACATAA	TCAGCAAGTTCTAGT
O2	ATGCCGCCGAGTCGTGTCCGGGCTCGCGCCGAGAAACGCGGGAAGGGAACATAA	CGACGATCCAGGAGT
O2	ATGGCCCACGGCCGGCATCGTGCAATGCCTGGGAAACGCGGGAAGGGAACATAA	GGTGCAGCCAGGGGT
O2	ATGAATGCTTTCCGAAGTGTCCACTAGCCCAGTAAACGCGGGAAGGGAACATAA	TCGGGAGGCTGGCCG
O2	ATGCTTACCCCGCATCTCTACACGCGGGCTCTCAAACGCGGGAAGGGAACATAA	GGTTCAGCACGGGGT
O2	ATGCGGATATCCCAGTGCTGGAGACTCGATCGGAAACGCGGGAAGGGAACATAA	GCATAGGCATCAGAA
O2	ATGCACGCCGCGGGACCCCCGGCACGCCGACCCAAACGCGGGAAGGGAACATAA	CGCGGGACCCGAAGG
O2	ATGGGATGCCCACTTGAGTGACGCGTAAGCGTAAAACGCGGGAAGGGAACATAA	CTGCCCGCAGGCCGG
O1	ATGCAATTTGGCCTGCGTCGGCGGGCCTGATGTAAACGCGGGAAGGGAACATAA	GAGGGGCGCCCGTGC
O1	ATGCGCCCGGTCCAAGACTCTTCCCGCATAAACAAACGCGGGAAGGGAACATAA	GCCGACGACGTCTGG
O1	ATGCCCTCAGACCCCAGTCGACCCCTTGGTGCCAAACGCGGGAAGGGAACATAA	TTCTTTTATGATCTT
O1	ATGATTAAATCTGCAAGGTCGGGCCTCAATCTTAAACGCGGGAAGGGAACATAA	GGGGTGCGCCCTATG
O1	ATGGTCCGGACGGGGGGTCCGGACGATCAGGGTAAACGCGGGAAGGGAACATAA	TTTTACCCATTCTAT
O1	ATGTGGCGCCTCGCAGCGGTACGCCGTCCGACTAAACGCGGGAAGGGAACATAA	CGGGCGGCGCGGGGC
O1	ATGTCGCGCTGGCCTCTCCGTGAACGTGGTATTAAACGCGGGAAGGGAACATAA	GTGCGTTCTTAGGGC
O1	ATGTACCTACCATAAGTCCCGTCGCAGGCGCATAAACACGGGAAGGGAACATAA	GGGTCGAGGGGCCAT
O1	ATGCGCGGCCGTTGGCCCTTGGCCTCCCGGGGCAAACGCGGGAAGGGAACATAA	CAGTATTCTATCCTG
O1	ATGTTCCCATCGCACGCACCGGCACTCGGCCCGAAACGCGGGAAGGGAACATAA	TCACGCCCCGACCGA
O1	ATGTAATCCCCCGTGATCGTAAGTTCCCTTAAACGCGGGAAGGGAACATAA	TGCGGGGCGGCGAAT
O1	ATGCCACGGCCCGGCATCATGGCGCACTTAGTCAAACGCGGGAAGGGAACATAA	ACCGGCAACGACGAC
O1	ATGTCTGCCGTTTCCTGCTCCGGCTCGGTGCTCAAACGCGGGAAGGGAACATAA	GTCGTGCCGAGTCGC
O1	ATGCCGGTTGGTCCTCGGGCCAGCTTCCGATCTAAACGCGGGAAGGGAACATAA	AGGGGCGTGTCAGTG
O1	ATGTTGCTCGCTTCACTTCTACCCGCGTGCCACAAACGCGGGAAGGGAACATAA	GTCCAAGAACCCTGC
O1	ATGAAGCACCTCGTCCCCGGTGGTTTGGGGATCAAACGCGGGAAGGGAACATAA	GATGAGCCGAAACTG
O1	ATGTGGGTCCGTCCGGGACCCCTCCTTTGTCAGAAACGCGGGAAGGGAACATAA	GGGGGGCGAAGGCTC
O1	ATGCTTCACCCCCTGCATCCCCCGCGCGCGCTGAGCGGGAAGGGAACATAA	AACCCTCCGGGGGTG
O1	ATGATCGCGCGGACCGCGGCTCCTACTGGAGCCAAACGCGGGAAGGGAACATAA	AGAGCGGGGGGGTAT
O1	ATGCCAGGTAACGCGCATAGTCATCTTTCGATTAAACGCGGGAAGGGAACATAA	GCAAGAGGGGCGCGC
O1	ATGTTCCGGTGACTTGCTTGGTGAACCCGCCACAAACGCGGGAAGGGAACATAA	GCCCTGCTACCGTTC
O1	ATGGCCAGCGGGCACTGCGCGCATAATCCCAAGAAACGCGGGAAGGGAACATAA	GCCGGCAAGGCTATC
O1	ATGCCGGCCATGGCCGATCGCCGATGGCCTGCCAAACGCGGGAAGGGAACATAA	ATGACCCCGAGCGG
O2	ATGGCCTCGGCATCCGTCGTCAGTCTGCGCCATAAACGCGGGAAGGGAACATAA	GTGAACTCCACGGGCC
O2	ATGGACCTACTCCCCGCCCGTTCGGTTCGCAGCAAACGCGGGAAGGGAACATAA	GGCGATCGAAATGCG
O2	ATGCGCAATCATACCTCCGGATCCGAATACTGAAACGCGGGAGGGAACATAA	GCAAGTCCTTATTT
O2	ATGAAGACACCCATGTGCCTGGCTTTGCAACGCAAACGCGGGAAGGGAACATAA	AACGTCGCCGGCCCC
O2	ATGCATCCCCTCGGGCTCCTCTCTAAGGCTTTGAAACGCGGGAAGGGAACATAA	TAGGGCGTCTAGGGG
O2	ATGCAGCCACTGCCCCAGTGCGCTTCCGATGGCAAACGCGGGAAGGGAACATAA	CGCGGGGCATGCACA
O2	ATGCGCTCCCCCGGCGGCCGCCGCAGCCCCTTCAAACGCGGGAAGGGAACATAA	TCGCCCTGGCTGCCG
O2	ATGGACCACTGCCTTCACCTGACCCAAGGCGCTAAACGCGGGAAGGGAACATAA	CTACATGCTTATTGA
O2	ATGATTACGCGCACCCAGCCGCATGCGGCGATGAAACGCGGGAAGGGAACATAA	CCAAACACCCTGCGT
O2	ATGGGCCGCCCGTACCTTCATGGTTGGGGGTACAAACGCGGGAAGGGAACATAA	GCGTGGGCCGATTCG
O2	ATGCTCGCGCTCTCCACTCTTCGAGGGCGGCTCAAACGCGGGAAGGGAACATAA	TATCTGCCTCACGTT
O2	ATGTCGGCGGCCCCCTCTGGCTCTGACGTCCGGAAACGCGGGAAGGGAACATAA	GGAGGAGGCGTGGGC
O2	ATGTCAGTGGAGGCCCGTGATTTCGTGCTCTGCAAACGCGGGAAGGGAACATAA	GACGCAGAATTCCTA
O2	ATGGAGCGGGCCTCCTGTTACAGCTAACGCCGCAAACGCGGGAAGGGAACATAA	GCCGGCAGGCGGGTG
O2	ATGTCCCGTTCCGACGCGCCGTGCCCCAGCTGTAAACGCGGGAAGGGAACATAA	CCGGACGCCGGAGAC
O2	ATGGGCCTGCTCCCCAGAACATGTTCCGCCATTTAAACGCGGGAAGGGAACATAA	ACGCGCGCAGAGACG
O2	ATGCTTCGTCAGCGCACGGGAGGTGCGTTCAGCAAACGCGGGAAGGGAACATAA	GGATGAAAGGGCCGA
O2	ATGAATAAGAAGTTGATCACAGCAGACGGCCTGAAACGCGGGAAGGGAACATAA	AGGCGTGGATCCAGC
O2	ATGCCGTCTTCTCGGCCATGCCCGGGTCATGACAAACGCGGGAAGGGAACATAA	GGTGCCGGCGCCGAT
O2	ATGGGGTCTCGCACCGGCGGAAACTATACCGGGAAACGCGGGAAGGGAACATAA	CGTGCCACCGGATTG
O2	ATGCCGCCTACCGCCGCCGGGACGTGAAAGGTGAAACGCGGGAAGGGAACATAA	GCCGCCGCCGGCCGT
O2	ATGTCGACCCCACGCGTGGACGATGTGTCTTCCAAACGCGGGAAGGGAACATAA	CGATAGGCGCGCAGA
O2	ATGAACGCCTTACGGCGGTCGATGTCTGCCTGCAAACGCGGGAAGGGAACATAA	TGGCGAGGCTGGGGG
O2	ATGCATACTCGCTATCCTCGTGGCTGTCCACCCAAACGCGGGAAGGGAACATAA	GCCGGGTCACTGCGA
O2	ATGCGGCGTCGCCGGTGCGTTTCCAATGCCCTCAAACGCGGGAAGGGAACATAA	ATCCCTGTTACGGGG
O2	ATGCTAGCCTGGCGCACGGTTTGCGACCGGAGTAAACGCGGGAAGGGAACATAA	CTGCCGCGGCCTTGA
O2	ATGGGCTCCGGACCCCTCGCCGGCTGCGCAGCTAAACGCGGGAAGGGAACATAA	GGGAACCACCTAGCC
A2	ATGTGAGGGGGCCGAGGCGCGGCGCCTTCGTGTAAACGCGGGAAGGGAACATAA	GGGGGAGAGGCCCGG
A2	ATGTAATAAGACTGCAAATGAATACCCCCGCCCAAACGCGGGAAGGGAACATAA	TGTGTCTGTGGACAA
A2	ATGATAACCGGGAGCAGTCCGTAGACCTCGTGCAAACGCGGGAAGGGAACATAA	GGCCCCGGTGAGGGG
A2	ATGTAGCCGCACCGGAGGACCTGCGGGCGTGACAAACGCGGGAAGGGAACATAA	GCGGCGTCCAGCGGG
A2	ATGGGGTTCATGCTATAGCGGCCTCGGTTCGACAAACGCGGGAAGGGAACATAA	CATGGGGTCGCGACC
A2	TTGGCGGCGCCAACCGCGGGGTAGGGGACCGCCAAACGCGGGAAGGGAACATAA	GCCCCCACCCGTCGA
A2	ATGACTCACATCGGCAGGGAAAGCTGCCCGATGAAACGCGGGAAGGGAACATAA	TGTTGGTAGGGAGTC
A2	ATGGGGCATATTCGGCCGCGATCTCCGGCGCAGCAACGCGGGAAGGGAACATAA	CCAAGGCAAATCGGG
A2	ATGTATTATGTGACAGGCCTCACCCGCCACCCCAAACGCGGGAAGGGAACATAA	CCAGAGGGACAAGT
A2	ATGGTGCGCAATGCGTGACCCTGTCTAGCGGCAGAACGCGGGAAGGGAACATAA	GCCTTGTCCGGCTTC
A2	ATGTTTGTGTCCGGATGTATATATGGACTCACGAAACGCGGGAAGGGAACATAA	GACGGGGTGGGACA
A2	ATGTGGGGCGACCGCGGGACGAACATAGCTCTCAAACGCGGGAAGGGAACATAA	GGCGCCGGGGACTCA
A2	ATGAGGCCACAGTCAGAAAATCACACGTTCGTTAAACGCGGGAAGGGAACATAA	CCCGGGAGCGTGTGG
A2	ATGATTAGTTCGCTGGCCTTTCCAGCGCCGCCCAAACGCGGGAAGGGAACATAA	TGGACGGGCGCCTAG
A2	ATGAGAGCTGGCAGCCACTAGGGCCCACCGCTCAAACGCGGGAAGGGAACATAA	GGAGCAACGAGCTG
A2	ATGCGAGCTTCCCGATTAAGCTAACTCCCCCGCAAACGCGGGAAGGGAACATAA	CGGCCGATGTAGACG
A2	ATGGGAAGGGCCGGTCTGGCATCAAGGGGGCCCAAACGCGGGAAGGGAACATAA	CGCGGGGAGGGCGTG
A2	ATGATACCATTAGGCCCTGATACGTCCGGTCTCAAACGCGGGAAGGGAACATAA	TGAGTGGCAGTCGCG
A2	ATGATTGGGAATTAAAAACTACCGCGCGAGGTCAAACGCGGGAAGGGAACATAA	CTAGGTCCGGGCGCG
A2	ATGTGAAGTATGTGGTCGAGGTCACCGCCCTCCAAACGCGGGAAGGGAACATAA	GTAAAGGGCGAGCAT
A2	ATGTGATTGAGGGTGTTGTGAGGATGTGCCGCCAAACGCGGGAAGGGAACATAA	ACCCCTGGGACTGGG
A2	ATGCGGTCTGTGGGGGATACTAATTTGAGCTCGAAACGCGGGAAGGGAACATAA	GTCTTGGTTGCGGTC
A2	ATGCCCCAGCAGCTGCTATACAAGCAGCGTTCGAAACGCGGGAAGGGAACATAA	ACGGACGTCCCGTGG
A2	ATGGTATGTTCGAGCGCTTACAAGCCCGCTCTAAAACGCGGGAAGGGAACATAA	GTCTCTGAATTGATT
A2	ATGCTACAATTATACACTCCACTCCATCGCGGGAAACGCGGGAAGGGAACATAA	CCGCGGGATGGAGCC
A2	ATGGGCACCCCCGAGGGGGACACTCAGGTCTGTAAACGCGGGAAGGGAACATAA	ACGATTCTTTAATCT
O1	ATGAACTGATATGCATGCCTCCGGCCCATTCTCAAACGCGGGAAGGGAACATAA	GCCGAGGGATTGTGC
O1	ATGAATACGGGGCTTGGACGCCATGGCCCACTCAAACGCGGGAAGGGAACATAA	GACGGCGCGGACTCT
O1	ATGGTTTCCCGGCCCTCGGGCCCGACTAGGCGTAAACGCGGGAAGGGAACATAA	GTTAGCGCGGAATCA
O1	ATGCAATCGCTCCTCATGCCGGACGTGATCCGCAAACGCGGGAAGGGAACATAA	GATCTTCTTCCGTTC
O1	ATGGTACTCGCCCCGGCCAACCATCGTGACAAACGCGGGAAGGGAACATAA	TGAAAACATACTTCT
O1	ATGACCCACTAGGCGACGAATCGTCGTCTTCGTAAACGCGGGAAGGGAACATAA	GCGCGCGCTCAGCCC
O1	ATGCGGCGGGGATCACCCCGCCCTGTCGGTCGGAAACGCGGGAAGGGAACATAA	GTTTGCGAAGCCCTA
O1	ATGGCCAGGCCACGATTGACCTCCTCCAGTTAAACGCGGGAAGGGAACATAA	GCGGCCCGGGCGCTG
O1	ATGAACGTCCTCCACCCGCTTCATTTGCTGCTTAAACGCGGGAAGGGAACATAA	GCGGCGGGGTGCCGC
O1	ATGGACCCCGCACGGTCTCCCCTGGGCTAGCGCAAACGCGGGAAGGGAACATAA	TTACCCCCTGCAGAT
O1	ATGTAGTTTGCAGACTCCCCTGCGGCTCGCGTGAAACGCGGGAAGGGAACATAA	GGGGCCGGCCCCGCG
O1	ATGCCCCCCGGAGGATCTATCTACCCCTACCCGAAACGCGGGAAGGGAACATAA	CTGGACATTGGTCCT
O1	ATGTCTGCCCTGAGCATTGGTGTGTCGCAACGTAAACGCGGGAAGGGAACATAA	CCGCTGGGGCCCCGC
O1	ATGCAGGGGTCGGCGGGGTCCTTTCGCGATCGGAAACGCGGGAAGGGAACATAA	AATGTCACGGGCTTC
O1	ATGCTCTCGCCCGACTGTGTAAAGCCCTGAAATAAACGCGGGAAGGGAACATAA	CCGACGAAGCCTGCGC
O1	ATGGGTAAACCATCGTAAATAGAGGGCCGGGCTAAACGCGGGAAGGGAACATAA	GGGCGTGGCGCGCTC
O1	ATGACCCATGGCACCGTGTTGCCAAACAGCAACAAACGCGGGAAGGGAACATAA	TATCGGTCAGGGTGC
O2	ATGCCCATCCCGAGCATACCATGCTGCGGGTAAACGCGGGAAGGGAACATAA	AACGAGCCACGGTGG
O2	ATGAGCAGGCCCGGTCTGCGTCCTCTGCCAGCTAAACGCGGGAAGGGAACATAA	CGGGCATGAGGGGTG
O2	ATGCACGCCTGCCCCCGTTGTGTGCCGCATGTCAAACGCGGGAAGGGAACATAA	CGCCAGCAGTCGCCG
O2	ATGCTGGGCCTCCCGCGCTGCCCGCGGGCTCCCAAACGCGGGAAGGGAACATAA	CGGCCCCGGAGACTG
O2	ATGCTGGGCCGGAGTCGCCGGCCGGACTCGCTCAAACGCGGGAAGGGAACATAA	GCTTGCAGGGTAAAC
O1	ATGTTCGTTGGTTAAAGCCGCGTCGCGGCGGACAAACGGGAAGGGAACATAA	CACCACCTATGGAAC
A2	ATGGCAGTGAGTCCAATAGAGGGCAAGGGCCCCAAACGCGGGAAGGGAACATAA	GCGAGGCGCATACCG
A2	ATGGTACTGCGGCCGTAGGGCGAGCCCCGGAGACAAACGCGGGAAGGGAACATAA	GTGAACAGCGGGTCT
A2	ATGATTTACGCGTGTGTATGGTGTCAGCCGCGCAAACGCGGGAAGGGAACATAA	GTCGGCGGTGTGGGT
A2	ATGCGACACAAGTAATCAGCCGCCGCGACGCCTAAACGCGGGAAGGGAACATAA	ACGACCAAAAGGAC
A2	ATGGGGCGCCCCGGGGCCGCAGCGAGCTGCGACAAACGCGGGAAGGGAACATAA	CAGAACGAGGACGAG
A2	ATGCAAAGTCCGGGCCGTCGCGACCGCCCCCCGAAACGCGGGAAGGGAACATAA	CCGGTTCGCGGCAAC
A2	ATGGGCTCGCAGCCATCCAGTAGCGTGCCGCAAACGCGGGAAGGGAACTAA	CGCAGGGCCGTGGGA
A2	ATGCGCTATCCCCCAGGCGTACTCTGTGCCCACAAACGCGGGAAGGGAACATAA	AAGGGGGACCAAGGC
A2	ATGTAGTTGAGCAGCGGTATACAACCTGCTTCTAAACGCGGGAAGGGAACATAA	AGGCGCCTGGCGGGA
A2	ATGCGGGGGGTCCTGTCGTTGAGTGGTCCTCCCAAACGCGGGAAGGGAACATAA	AGCACGCGCGGCCCG
A2	ATGGTCCATTAAAGAAAGCCAACGGCGCCGCACAAACGCGGGAAGGAACATAA	ACGGTGCGAGCAGAC
A2	ATGATGGGGGACCCATGAACCTATCTCCGGTTGAAACGCGGGAAGGGAACATAA	CGGGCCGCACTGTAG
A2	ATGTATACGGAGACCCTTTGCAGCACAACCGGCAAACGCGGGAAGGGAACATAA	CCGCGGGACAAGACA
A2	ATGAGTTTGAGTCCAGTGACGATAGGTAACGTCAAACGCGGGAAGGGAACATAA	CTCTAAGGGTAGACC
A2	ATGGCCCGGTAGGACATAGACATCCGGCGCATCAAACGCGGGAAGGGAACATAA	TCGTGGAGGGTGAGC
A2	ATGGGTGGATTGTAAATCGCGACTCGGGCCCGGAAACGCGGGAAGGGAACATAA	GCTCGAGAGGACCCG
A2	ATGTAGGTACTCCGAGTTGTTATCCCGGGGCCGAAACGCGGGAAGGGAACATAA	GACGGGGGCGCGGCT
A2	ATGACGGATCCTTTCGACTGGGCCCACGCTCCCAAACGCGGGAAGGGAACATAA	CCGAGTTTCACGGCA
A2	ATGACAAATCGGCCGCCGCCAGTCCGCGACCCGAAACGCGGGAAGGGAACATAA	CGGGGCCTCGGCCGG
A2	ATGGTGGGCAACGCATCCGAAGCTAGGCACGCACGCGGGAAGGGAACATAA	GTGGGGTGGGGGGAC
A2	ATGCGGAGGTGCCCCGAACGGAGCGCTCCCGCCAAACGCGGGAAGGGAACATAA	GTCGGTGTGTACGAG
A2	ATGCATCGGGAACAACCTTATAGCGGACTCTGAAACGCGGGAAGGGAACATAA	AACTGATACCGTACA
A2	ATGTGACGCACATTCCTTAACAACTACTCCGATAAACGGGGAAGGGAACATAA	GAGGCGCGCCGTAGG
A2	ATGTTATATTTCAGAAGCATCGCCCCGCTACCCAAACGCGGGAAGGGAACATAA	CGGAGCTCTTGACCG
O1	ATGGGGCCCATGCCGCCCCCGTCCGGTGGCGCGAAACGCGGGAAGGGAACATAA	TTAACTGATGAAATA
O1	ATGCTCCCCCCCTTGGACCTCAGAACACCGCCTAAACGCGGGAAGGGAACGTAA	TAAAGAAATGTGCCT
O1	ATGGGCTCCCCCGCCGCCCCCCGCGCACCCAGGAAACGCGGGAAGGGAACATAA	GCCTCATCCTTCACA
O1	ATGATTCCGCGATTCGCCCCGTACGAGCGTCAGAAACGCGGGAAGGGAACATAA	GACCTGCGGCTGCGG
O1	ATGCAGGCCTCTAGGGCACGGGAAGGGCCCGGAACCGGGAAGGGAACATAA	TGTTACGCGGCGCGC
O1	ATGCGGCGCCCCCGCGATCTCGTTCGCCGGCTGAAACGCGGGAAGGGAACATAA	GAAGCCGGTCAGGGC
O1	ATGCCCAGCCGCTGGGCGCAGATCCCCGAGCTCAAACGCGGGAAGGGAACATAA	GTTATTCAGATTACC
O1	ATGCGCTCGGGTGGACCCGGGCCTCGCCGTCCCAAACGCGGGAAGGGAACATAA	GCGGGGGGCGGCCCG
O1	ATGCCCCCCCTGGGCAGTGGCGAGTGCATGCCTAAACGCGGGAAGGGAACATAA	GGGGCGGCCGAGTCG
O1	ATGTACTGCGGGACGCTCGTCAGGCGGCGATGAAACGCGGGAAGGGAACATAA	TCCCGGCTTCTTAC
O1	ATGTCTCCTACCGACTCTCGGGGTCTCGGACACAAACGCGGGAAGGGAACATAA	CGAACGGGATGGACC
O1	ATGCCGAGTCCCCACCTCGGGCCCGGTGACGTCAAACGCGGGAAGGGAACATAA	CGGGCCCTCGGTAAA
O1	ATGACATCGTCGTGATGGCACTTCCCTCAGGCCAAACGCGGGAAGGGAACATAA	CCCGCTGTGCGTCCA
O1	ATGCTCGGTTGATTATAGTCTAGTCGGATTTAAACGCGGAAGGGAACATAA	TCGTTGTCCGATTTG
O1	ATGAATAAAACCCGACGCTCTATTTAAGTTCCCAAACGCGGGAAGGGAACATAA	GGGGTTATCTCATAT
O1	ATGCGGCCCCCTGGGGCTTGCATTGGCCTCGGTAAACGCGGGAAGGGAACATAA	ATCCGAGATCCTGGG
O1	ATGGTTTCCCCTATGCCACATATACACTATCAGAAACGCGGGAAGGGAACATAA	GCGGCCGGGAGCGGC
O1	ATGCGAGGTTGCGGTGCGTTGCAGCGCAAAGGGAAACGCGGGAAGGGAACATAA	CCGCCACGTCTCCCC
O1	ATGAGTTGCGGGTCTGGTCTTCCTCCGCAAGGTAAACGCGGGAAGGGAACATAA	AGGGGGCGAGCGTGG
O1	ATGCGCAGGGCCGCGTCGGGTCTCATCATACTTAAACGCGGGAAGGGAACATAA	TCGGAAGGGCTTCGT
O1	ATGTACAGGACGACACAGCCGGCCCTTGCACCCAAACGCGGGAAGGGAACATAA	AGGCTCTGGCTCTCT
O1	ATGGCGGTCCCCGCCCCCGGGAGCAGGCAGGGGAAACGCGGGAAGGGAACATAA	ATGATACGACGTTCG
O1	ATGGGGGCAACCCCGCCGCGAAGCCCTCCACGGAAACGCGGGAAGGGAACATAA	GATGTTATAATGTTT
O1	ATGTGCGTCCGGCCACCGCTTCGCCCTCCCCCGAAACGCGGGAAGGGAACATAA	TTCATTCCTATGCTG
O1	ATGACCCAGGTACATGGGTGGACGCCGTAATAAACGCGGGAAGGGAACATAA	GCTGGTAATGGTTAC
O1	ATGTGGTAGACCCGCAGAGAGCCGACGTAGCCTAAACGCGGGAAGGGAACATAA	TTTTGAAGCGACTTT
O1	ATGTCCGGCCCCTGCGGGCCTCCCTTTAGGGGCAAACGCGGGAAGGGAACATAA	GGTCCGGAGGGAATG
O1	ATGCCCCTCGGCGAACGCACAGCCACAGGCCCGAAACGCGGGAAGGGAACATAA	GCAGTACCGTAGCAG
O1	ATGTCACTCCGTGGACTTCCCCTGAGCATCGTCAAACGCGGGAAGGGAACATAA	GACCGGGGCGCCACG
O2	ATGCCGTCTCGCTCACCCTCGCCCTAGCTGCAAACGCGGGAAGGGAACATAA	CTTCTCGGCCGGATC
O1	ATGCGACCGACCGCCCCAGTCCGTTCCATGCGCAAACGCGGGAAGGGAACATAA	GGACCGGATGGACC
O1	ATGCTTCCACCATCCGTCACCGGATAATGCATAAACGCGGGAAGAACATA	CCACCTGCAGCATTG
O1	ATGCCGCCTAGACTGCGCTTTACGTCCTGCGTCAAACGCGGGAAGGGAACATAA	CCAAGACAGCTACTC
O1	ATGTGCCCCCGATCCGATCACCATCTTCTACGCGGGAAGGGAACATAA	CTGTTATCAGTGCGC
O1	ATGCTGGGGCCGACTCTCCGCCCCCGCTAGGGTAAACGCGGGAAGGGAACATAA	GTCCGCTCGGGC
O2	ATGGCCGTGGAGCGGTGGCGCGCGTCGGAGGCTAAACGCGGGAAGGGAACATAA	GAGGGCGCGGTGGGG
O2	ATGGTTACTATCGTCGCTACCTCCGCTCAGAGCAAACGCGGGAAGGGAACATAA	GGGCGGCTCGAGTCG
O2	ATGCACCTAGGCCCACCTGCCGCCCCCCTGCCCAAACGCGGGAAGGGAACATAA	CTTGGCCCGTGTGCT
O2	ATGTTAGGGAATGTGCTACGGGAATCATAAGAGAAACGCGGGAAGGGAACATAA	GGGTCGGGCACCGAA
O2	ATGTCGCCTTCAGCCCACCTGAGCGTCAAATAGAAAGCGGGAAGGGAACATAA	TGCCCCGCCCACCCG
O2	ATGGTCGCGCCCGCCCCACTACTCAGCAGTCACAAACGCGGGAAGGGAACATAA	GGCCGCGCCCAGACA
O2	ATGCGTCCGGCGAGACGTCCGCTCCCACCGGGCAAACGCGGGAAGGGAACATAA	TGGGATGGGCGACGA
O2	ATGGCGGTGCTGGTCCCAACCGCTGCGCGCCCGAAACGCGGGAAGGGAACATAA	GACGCGAGACAGCCG
O2	ATGAAGACGTCGAAGTCTTCTCCCCTAGACGTCAAACGCGGGAAGGGAACATAA	TCTTCGGATCCGAGA
O2	ATGTGGAACGTTCATCGAAGTGTTCTCGACGGGAAACGCGGGAAGGGAACATAA	CGGGCCCTGCATCGG
O2	ATGACATTAGCGTTTGCTCACCTAGCTGTACCCAAACGCGGGAAGGGAACATAA	GTGCGGAGTGGGAA
O2	ATGAAAACCAGGAACAAGCCGCCGGGGACGTCTAAACGCGGGAAGGGAACATAA	GCCGTCGCCGTGGAA
O2	ATGTATTCACGATCCGCCCAAGCAAGCAGCTACAAACGCGGGAAGGGAACATAA	GAAGGAAGGGGGACG
O2	ATGAATAGGCTATTGCTTGCAATCGTCACACTAAAACGCGGGAAGGGAACATAA	GCCCCCCGTGCGACA
O2	ATGGCCGGCCCGCCGGGGCTCCCGCCGGCGGTTAAACGCGGGAAGGGAACATAA	GAGACCGGCAGAGAG
O2	ATGAGGCTTAGTCGACCTCAACCGCAAGAGCATAAACGCGGGAAGGGAACATAA	GCTAACGGGAATGGG
O2	ATGGCCGGGAGGTTCCCTCCTAACCCCCCTGGGAAACGCGGGAAGGGAACATAA	GTATTCAGCAGTGCG
O2	ATGCATGGTCGGCACTCGGGGACGGCCTCTGGGAAACGCGGGAAGGGAACATAA	CATTGGATGTGCACT
O2	ATGGCCCGGGCTTCCACGTGGCGCCGGTCGGCCAAACGCGGGAAGGGAACATAA	GAGCAGGGCGAGTCG
O2	ATGCGATGCGCGCTCCGGTCCTACACGGCGCGGAAACGCGGGAAGGGAACATAA	GGTCGTGCCGGTTAG
O2	ATGAGCCAGGCGACATATACTTATCCTTTAACGAAACGCGGGAAGGGAACATAA	ATCGCGTGGCCGGGA
O2	ATGCCCGTCTCGTGGCTCCAGCGCGGCCGGTAGAACGCGGGAAGGGAACATAA	CCGGGCGGGGCCAT
O2	ATGCAACCTCTGTGATACGTGTCCGCTATCACGAAACGCGGGAAGGGAACATA	GGGGCGCCGGCGAAG
O2	ATGCAGCCCTCTTCCGGCCGGACCGGACGCACGAAACGCGGGAAGGGAACATAA	GGACCGGCCCCTCCC
O2	ATGAATCACGACTGCCAAGGTACCTAGTTCCAAACGCGGGAAGGGAACATAA	GACGGCAAGAACCCG
O2	ATGTTCGCGCGGCGGCTTGCTACTCCGCACAGGAAACGCGGGAAGGGAACATAA	GAACGCGGCGGCAGG
O2	ATGCCCTGGTCCACCCCCTCGGTCTAAACGAGGAAACGCGGGAAGGGAACATAA	CCAAAGGCACTGCGC
O2	ATGCGTTTGCCACGCGATCTCGCATGGCCGCGGAAACGCGGGAAGGGAACCTAA	CGGGGCCCGCGAGCT
O2	ATGAGAAACAATATTAGAAACCGATCCAGCTCGAAACGCGGGAAGGGAACATAA	TGTGAAACCGACCG
O2	ATGCAATAATCGGTTGAATGTTTATACACGTCGAAACGCGGGAAGGGAACATAA	GGTTAGTATGTGGAG
O2	ATGTGGCCCACAAAGAATCGCTAGGCCGGCAATAAACGCGGGAAGGGAACATAA	GAGGGGGACATCTGGT
O2	ATGGCCTGCCGGCCGACCTCGGGCGGAGCCAATAAACGCGGGAAGGGAACATAA	CCTAACTATGGAGCC
O2	ATGGGCGAGCGCTGTTCAGGGTTCCCACTCTCGAAACGCGGGAAGGGAACATAA	GATCCAGGAGGCCTG
O2	ATGAATAATCCCGGAAACTCGGAGGAACATTCGAAACGCGGGAAGGGAACATAA	GAGGGCCGCGGACTT
O2	ATGCGCACCGGGCCCGCCCCGACCGGCGAGTCTAAACGCGGGAAGGGAACATAA	TCGCGGCGCACCGGA
O2	ATGTCCGCTCGGGCTCAAGGTGGCCCAAGAATCAAACGCGGGAAGGGAACATAA	TTCAAAGCCGCCGTC
O2	ATGTCCGTCCTAAACCCCATGAGTCGCTGCTCCAAACGCGGGAAGGGAACATAA	TAGCGCGCCGTATGT
O2	ATGCGAGAGCGACCCCGGGCCTACTACGCGCTCAAACGCGGGAAGGTAACATAA	GTGGCACTGACAGGA
A1	ATGTCTCAAACTGGATACAGAGGTCCGTGCCGGAAACGCGGGAAGGGAACATAA	GCCCTCCAGCGAGGA
O1	ATGCCCAGGTATCTCGTCCCATCGGGCACCTAGAAACGCGGGAAGGGAACATAA	CATCATAATGTCAGG
O1	ATGTACCCGGACCTCTGAGCGTTCGTCAGCGCAAACGCGGGAAGGGAACATAA	CAACGATTTATTTTG
O1	ATGGGAAGCCTTACGTCTGCACGCGCTGAGGACAAACGCGGGAAGGGAACATAA	GGTCCTTTCGTTGAT
O1	ATGCCGGGCCGCACGTGAGCCCCTCTTCGGGGAACGCGGGAAGGGAACATAA	GGCTGGCGAGTGGGG
O1	ATGTGTCTGCTCGCGATGCTCACCACGCCTTAGAAACGCGGGAAGGGAACATAA	GCCGGTCCAAGTCTA
O1	ATGGAGTCCGGGTCCACCGCGCGGTCGCGATAGAAACGCGGGAAGGGAACATAA	TGGCTCGATAAAACC
O1	ATGCCAAACCTACCGTGGTTTTCCCGTGGAGTTAAACGCGGGAAGGGAACATAA	GGCCAAACGATGGCG
O1	ATGCACCTGCTAGGTTCGGCACACCGCCGATCAAAACGCGGGAAGGGAACATAA	TTCGCAGTTGCGCCC
O1	ATGCGCACGCCGTGGCTTCGCAACGTGCTTTCCAAACGCGGGAAGGGAACATAA	CGTTTAATTGGCAAT
O1	ATGGGACCACGTCCTGGCTCTATATCAAGCGTAAAACGCGGGAAGGGAACATAA	GTGCCCGCCGCTTGT
O1	ATGCTTCTTGCCCCGTCTCCAGGACCAGTCTTTAAACGCGGGAAGGGAACATAA	CTTGGACCACCACAC
O1	ATGTTCTGAGCCCGGACCAGGCGCGGTGCCCTGAAACGCGGGAAGGGAACATAA	GTCCTCCGTGACTTG
O1	ATGGTCGGTTCGCTCGGGGCGGTAGCCTTCCGCAAACGCGGGAAGGGAACATAA	TAGAGAGGACCCAG
O1	ATGCGGCGCGGCCTCCGAATTCAACAGGCCCCCAAACGCGGGAAGGGAACATAA	AGCGTATCCCAATTT
O1	ATGCCCTGGCGCCCTCCGTAGCGCGCTCAGGGAAACGCGGGAAGGGAACATAA	CTTGCGCAACGGGTC
O1	ATGGCCACGGCTTGCGCCGGGAGTGACTGTAACAAACGCGGGAAGGGAACATAA	ACCGACCAGAGTTAA
O1	ATGGCCCCCGCGTACAAGACATACGAGCGTCTTAAACGCGGGAAGGGAACATAA	GGGGTGGCTGTTTTC
O1	ATGCGTTGCACCCAAGTCACGCCCCACCTTGTCAAACGCGGGAAGGGAACATAA	GGGGGCCGAGCCTGG
O1	ATGGCGCGGGCAGTTACATTTGACGTCGCTCTACGCGGGAAGGGAACATAA	GTCGCTGCGAGCACG
A2	ATGCGAATCATGCCACACGCGTCCACGTCCCGAAAACGCGGGAAGGGAACATAA	GGAGTAAGCTACGAA
A2	ATGGGTGGGCGTGTCGTACGCCCCGACGGGAAACGCGGGAAGGGAACATAA	GCTGCGGGACCGGAA
A2	ATGTTTTTGATGGGATGGCATCCACGCCACGTCAAACGCGGGAAGGGAACATAA	CACCAGCAGCGGCAA
A2	ATGTCGATTGGGGGCGGCGGCGCGCGTTACACCAAACGCGGGAAGGGAACATAA	GGGTGCGGCCAGGGG
A2	ATGCCCCACGCAAGCGGCGCCACCCAACCCCCGAAACGCGGGAAGGGAACATAA	CACGCACGCGGCGAC
A2	ATGGCTCACGAACGGGCCTGGAGCAGGTGCGGGAAACGCGGGAAGGGAACATAA	GCCAAGGCAGAGCCA
A2	ATGGGTGGGCAGCGGGCGGCCAGACGGCGCGCCAAACGCGGGAAGGGAACATAA	CTCCACATCAGCGGC
A2	ATGCCCCCGGCAACCAAGCGCCCCGCCGCCGCCAAACGCGGGAAGGGAACATAA	GGTCGGAGAGGGGAC
A2	ATGTAATCCGTGTCGGTTGCTCCGTGCCCGGGGAAACGCGGGAAGGGAACATAA	GTTGTGAGGCAGGCG
A2	ATGTTCTACCTTAATCCAAACACCCACCTGTTAAAACGCGGGAAGGGAACATAA	CCGACGGCTCCGGAA
A2	ATGATGGGGAGCTTGTACAAGAGCCGGCACAGTAAACGCGGGAAGGGAACATAA	CGGGGGGCGCAGGCC
A2	ATGATCATTGAAGCACATTAAACGCACTGGTCAAACGCGGGAAGGGAACATAA	AAAGGGCGCCCGGGG
A2	ATGCCGTCCAAGCCCGCGAGGCGCGCCGCGCCGAAACGCGGGAAGGGAACATAA	TAGGGGTGTGTCCCG
A2	ATGAGAAATCATACGACAGCCCTCACGTCGACGAAACGCGGGAAGGGAACATAA	CCAAGAAGCGGCCG
A2	ATGGTTTCGGTGAGCACATTAACACTACTCTCGAAACGCGGGAAGGGAACATAA	GGAGCCCAGTCACGG
A2	ATGGATTAATAAGCCTACCAATTACGCACCCCGAAACGCGGGAAGGGAACATAA	AGAACACACGGCAGG
A2	ATGAGCTGTGCCCAGCCGAGTTGCCTTCCCCCTAAACGCGGGAAGGGAACATAA	AGGTTATCTACCTCT
A2	ATGAGAACGAAGGGAGACAAAGGGGAGGCGGGTAAACGCGGGAAGGGAACATAA	ACGCGGGTGTGCTGG
A2	ATGTTTAATAATCAATTACGCAGAGCGTCGCGGAAACGCGGGAAGGGAACATAA	GCGAAGGGAGACCGG
A2	ATGTTGGGGGTCCGCTGCTCCATCACGACCCCGAAACGCGGGAAGGGAACATAA	GCGCGGGACCGGGAC
A2	ATGTCTGGGGTTCGGTGAGCGATGGTGGACTGTAAACGCGGGAAGGGAACATAA	AGAGGGGCCGCCGGA
A2	ATGTGTTAGCAGGAGGAAGGCTCCCCCTTGCGAACGCGGGAAGGGAACATAA	CGCGGGTCGGCGACT
A2	ATGCCACCGCAGATTACTGAACCCAGCGAGTAAAAACGCGGGAAGGGAACATAA	CATCACCCAGGACTG
A2	ATGTCTCGGGTCCGGCAGGAGAAGCCGCGCCGTAAACGCGGGAAGGGAACATAA	AGAGGGGGCATAAGA
A2	ATGTCATTCACCATGGAAACCGCGGCCTGGTGCAAACGCGGGAAGGGAACATAA	GGGGTACCCGGGTCC
A2	ATGAGGGAGATGGGAGGGGAGGAGGCCCCGCCGAAACGCGGGAAGGGAACATAA	GTGACCTGAACCGGT
A2	ATGGGGGTCGATAGCAGGGGGCGGCCCTGGTGCAAACGCGGGAAGGGAACATAA	GTTTGAAATTGCTGG
A2	ATGTTATACACGCCCGAGCAACCCCAGGCATCGAAACGCGGGAAGGGAACATAA	CCGCCGAAGGGCCCC
O2	ATGAAAAGTGCTGCGAATCGTGCAGCCCGACAACGCGGGAAGGGAACATAA	GAGAGCTGCACGCAA
O2	ATGGCCGGTGTTCCTCCCGGATTGTCCGCGCACAAACGCGGGAAGGGAACATAA	GAGCACGGACGGGAC
O2	ATGTCAAGCGAGACATAGAGTTTGATGATCCAGAACGCGGGAAGGGAACATA	AGGCGGCGGAGTCAC
O2	ATGTGCCGGCCCCCCTCTACCTGATTGGCCCTGAAACGCGGGAAGGGAACATAA	TTGCGACCTCACCTG
O2	ATGGCGTGTGGCCCCCAGGGAGCCCCGCGGGTTAAACGCGGGAAGGGAACATAA	AGGTACCGCTCGG
O2	ATGCGGGTCTGACCTGGTCAACATCGGGTCACAAACGCGGGAAGGGAACATAA	CGGGGCTGACTCGCC
O2	ATGGCCACGCGGGTCGTGTTGTCGCCCGCTAGCAAACGCGGGAAGGGAACATAA	AGAGCCCCCCGATCC
O2	ATGCCCCCCTACGCTCGGGCGCGCATGGCCAGCAAACGCGGGAAGGGAACATAA	CGGGCGTAGCATGAT
O2	ATGAGTGTTAATAAATGAACCCCCTCACCTCCAAACGCGGGAAGGGAACATAA	CGAGGGGGGCCCGCG
O2	ATGTCTGCACAATAATTTTGAAACATTAGACGCAAACGCGGGAAGGGAACATAA	GAGCAGACACGGGG
O2	ATGCGGCGCGAGCGCTCCCCTGCCTGATCTCTGAAACGCGGGAAGGGAACATAA	GAGCTATCCATGGAC
O1	ATGTGGCTTCCGTTCTGGCCCCCAATCGAATAGAAACGCGGGAAGGGAACATAA	TGAGTTTCGACCATG
O1	ATGCTCCGTCCCCCGTCCTCGGTCGCTGCGGAAACGCGGAAGGGAACATAA	ATATGAAATAGGGTT
O1	ATGATAGCCTAGGCCTTCACACGTGCGACGCGCAAACGCGGGAAGGGAACATAA	CGGGCACAACACGAC
E1	ATGCCGCGATCGTCCCAATGAGGAGCACCAACGAAACGCGGAAGGGAACATA	ATCCATCGGATTTAC
O1	ATGTGGCCCCGCCTCGCGCTACCTGGTAGACCTAAACGCGGGAAGGGAACATAA	TAATATGCAGATTGT
O1	ATGCGTGTCCCTCAGGCCCCTCTGAGTCTGATGAAACGCGGGAAGGGAACATAA	ATGGCAGGCCCATGG
O1	ATGCCGACTCCCGCCGGGGCCTGCGGGGCGTCCAAACGCGGGAAGGGAACATAA	GGGGGCCCCCGGGCG
O1	ATGGGTTGCGTCGGCTCTTCCCGGATGTCGCACAAACGCGGGAAGGGAACATAA	GGGGTGTGCGGGCGC
O1	ATGCGCGCTTCCATGCGCGGGTTTCGGCGCCCTAAACGCGGGAAGGGAACATAA	TAAAGAACCCATTCG
O1	ATGACGCGCTATCGGCCCGCCTTCTCTAAGAGGAAACGCGGGAAGGGAACATAA	CCCCGCGGCGTGGGC
O1	ATGGCGGTCACTGCGCGTTCGTAAGCAGAGTCTAAACGCGGGAAGGGAACATAA	ACCCTCATCGTCAGG
O1	ATGGCACCCTAGCGCGCAGTCACCGCATCGTCCAAACGCGGGAAGGGAACATAA	GTGGGGGGGAGCCGC
O1	ATGTTGCACGGCCTCCCCCTCATCATCTTTCGGAAACGCGGGAAGGGAACATAA	ATGGTACTGGCATCA
O1	ATGGCACTCCGCCAACTATTTCCGCCATACCCCAAACGCGGGAAGGGAACATAA	GGCGCGAGTGGGCCG
O1	ATGGTACATACTCCTTTCCTCTCTGATCCTTCCAAACGCGGGAAGGGAACATAA	AAATGACATCCTGTC
O1	ATGTCGCTAGCCTATGCTCCAACGCGCACCCCTAAACGCGGGAAGGGAACATAA	CGCTCACGAGATGCT
O1	ATGCAGCGGGCCAGGTATCTATGGGTTGCTTTCAAACGCGGGAAGGGAACATGA	AGCGGGGGAGACCCC
O1	ATGGCCCTCTCGTGGGCCCCCGCCGACCATGGTAAACGCGGGAAGGGAACATAA	AACGTTAATCTCTAC
O1	ATGATGCCTCCACCCCCTCGCGTGAAGCTCTAACGCGGGAAGGGAACATAA	CGCCGTCAGATCCGA
O1	ATGTGATTTCAGCCACGACCGTGGCGTTCCAACAAACGCGGGAAGGGAACATAA	TCGAGGGCCATCGGC
O1	ATGCCTGGCGAGAGTCGGTGGTTGGGACGCTTCAAACGCGGGAAGGGAACATAA	GTAGGGCGCAGTTGC
O1	ATGTTGGGCGCCGTGGGTCGACAGCGATGGGAGAAACGCGGGAAGGGAACATAA	TACCTCCTGCCGATT
O1	ATGGCCCCGTACAAAAATCATCAGAGCTTCACTAAACGCGGGAAGGGAACATAA	GCCTGAGGTGGAGCG
O2	ATGGCGGTGCGTCACGGCCGCGATCTTTCACATAAACGCGGGAAGGGAACATAA	CCGAAGGGAGCGCAG
O2	ATGCAGGGCCCGCTTGTAAATCCATCCCATGCGAAACGCGGGAAGGGAACATAA	CGCCACCGACGGGGC
O2	ATGATCGCCCACCGCGCAGCTCCCACTCTGATCAAACGCGGGAAGGGAACATAA	AACCTAAGAGCCCGG
O2	ATGCGATTGCTATGTTGCTTGAGATATGTTCTCAAACGCGGGAAGGGAACATAA	AGGCGCGTGAGCCGC
O2	ATGGAGGCGCTGCCGTCGCTAACGATGCGCGATAAACGCGGGAAGGGAACATAA	CATGACGGAGGCTGG
O2	ATGCTGTGGATCTCCTCTTCACCCTGTGCAGGCAAACGCGGGAAGGGAACATAA	ACCGGGGCTAGAGCT
O2	ATGTTGTACGCACGGAGGTTTGACCGCCACAGGAAACGCGGGAAGGGAACATAA	TGACTGAGCCCCTG
O2	ATGCGATCGCAGCACGTCACCCAGCGATCCCCCAAACGCGGGAAGGGAACATAA	GCGGCGGCGCATCGC
O2	ATGAAGAACCGTAGAGTTTCTGAACTGTTATCGAAACGCGGGAAGGGAACATAA	GTCAACAAAATTCTG
O2	ATGCCTCCCCACCTGTAGCTGTTCCTCACACCCAAACGCGGGAAGGGAACATAA	AGGGCTCACGTCTAT
O2	ATGAAATTGACCTGCCCTCACTACTGTCCACTTAAACGCGGGAAGGGAACATAA	GACCGTGACGCGGAC
O2	ATGGGTCACCTGCGCCAGCTTCGCTCGAAGAGCAAACGCGGGAAGGGAACATAA	GAGCCGGCAGCCCGC
O2	ATGCATTGTACACAAGATTCTTCTCTCGGCCCGAAACGCGGGAAGGGAACATAA	GGGTGCTGCGCCGA
O2	ATGGTCCCTCGCCCAAAGCCGACGCAGTGGCCTAAACGCGGGAAGGGAACATAA	TCGCCGGAACAGCCG
O2	ATGTTCAGCGGTCGGTGCCTACACAGAGGATCGAAACGCGGGAAGGGAACATAA	GTTGCCGCTAAGCAC
O2	ATGAAAGCAAGGGAGCCTGCTCAGGCGCCCCGGAAACGCGGGAAGGGAACATAA	AGAGACGACAGCAGG
O2	ATGGCGGCCACGGGGCGTGGGAGCGGTGCATGGAAACGCGGAAAGGGAACATAA	CGACCCTCAACGGGC
O2	ATGCCCGCAACGACTGTCCTCGATGCTGGACGCAAACGCGGGAAGGGAACATAA	AGGGGGGCTTTGACC
O2	ATGTTCCTCTTTCGGGGCGCAGCGCCCCGTTAAAAACGCGGGAAGGGAACATAA	TTGTTAGATGTTCGA
O2	ATGTAATGACGTTACCCGGGACACCTACCAATAAACGCGGGAAGGGAACATAA	TGGCGCAATCGCCAG
O2	ATGAGCAGCTGGGGACGCCCGTGCATATGTCATAAACGCGGGAAGGGAACATAA	CGAGCCTTGTGGCGC
O2	ATGCACCCACCCCGTCATGTCCAATCTCCCCCGAAACGCGGGAAGGGAACATAA	GGACGCCAGTGGCCA
O2	ATGCGGGCCGGTCGTCTTGGGGGTTTTCCCGCTAAACGCGGGAAGGGAACATAA	AGACCGGGGCTCATC
O2	ATGGCACACAGACGACTATCCATACAATTGGCTAAACGCGGGAAGGGAACATAA	AGCCCGAAAGGGGCG
O2	ATGCATATCTCGCGGATGCGATGACCAAAGTGCAAACGCGGGAAGGGAACATAA	CGTGGCGGCGGTCCGG
O2	ATGCGTCCACGGAACCATCGCCCCCACGATTGCAAACGCGGGAAGGGAACATAA	TCGGCCAGGTCCGGG
O2	ATGTCGCAGAGGCTCGGGAGCCCCCCGTGCGCCAAACGCGGGAAGGGAACATAA	AGTCGGCGGTTAAGG
O2	ATGTGTTACGATAATTACCAGACCATTTATTACAAACGCGGGAAGGGAACATAA	CCATGCCTCCGACA
O2	ATGCGCGCCGGGCCGCCTACGCACGACGGCTACAAACGCGGGAAGGGAACATAA	GCCGGGCGAGGAGAA
O2	ATGTAGGGGCATATTCCGCAGCGGGCGGTCCTTAAACGCGGGAAGGGAACATAA	GAGGGGGGCCCCGGT
O2	ATGTCTCCAGGACGGCGAGCCGTCGGCGCCGCTAAACGCGGGAAGGGAACATAA	GCCCCCCCGGGACGC
O2	ATGAGCAGAATAAAGCCTGCGTCTAGACGGTCCAAACGCGGGAAGGGAACATAA	AGTCCGGCGGCTATA
O2	ATGGCCATTAATCAGCTTCTTGCGTATCCAGGGAAACGCGGGAAGGGAACATAA	GCACTCGGAGGGGCA
O2	ATGACGCACGGGACTCACCTTCCCCCCGACTCCAAACGCGGGAAGGGAACATAA	CGATGTGAGTCCAAG
O2	ATGCCCGCCGGAACCACAGGCAGCTGGCGTTAGAAACGCGGGAAGGGAACATAA	CGATGCCGCCGTGCC
O2	ATGGCTCACGAGGTCAGATCTGTCTCTACTTGAAACGCGGGAAGGGAACATAA	GAACCAGGGGGACAG
O2	ATGGACTGAGTATCCTCGCATTGTACCCTGAAGAAACGCGGGAAGGGAACTAA	GCCCAACGGGTGGGG
O2	ATGCCCCCTGGCTCCCATACGTCGCCTTTCAACAAACGCGGGAAGGGAACATAA	TGTGCATTACCTTAT
O2	ATGTTTTCGCACCATTCGTCCGGACGCTCTGTCAAACGCGGGAAGGGAACATAA	ACCCGGGTGGGTCCA
O2	ATGGGCTAGGGGCCTACCCCGCCCGGCCATCTCAAACGCGGGAAGGGAACATAA	GGTGCGTAGGAGCGG
O2	ATGTAGAGGGCTAAGGGTCCGCCCTGCGGCACTAAACGCGGGAAGGGAACATAA	ATAGAGCCCGGCGCC
O2	ATGGTACGCCCCTCTCCTGTATCAACAGCGCGCAAACGCGGGAAGGGAACATAA	CGGGGCTCTGGACGT
O2	ATGGTGGGGTCCCTCTACTGTACTTGCAACTCCAAACGCGGGAAGGGAACATAA	CTGAAACGAGAC
O2	ATGGACCCCGTCTTCCGGCTCCTGTTGTGATCGAAACGCGGGAAGGGAACATAA	GGGTGGGGAGCGGTT
O2	ATGGCCTAGTGCGTTCGGCCTCCCACACAGCCGAAACGCTGGAAGGGAACATAA	CCGGACTCTGCCGAT
O1	ATGGGGTCGTGTTGACGGGTTACTCTCCCTCACAAACGCGGGAAGGGAACATAA	TGGCGTGTTGATGGC
O1	ATGTCGGTCCTCGCCTGCGGTCAGATGCGCCAGAAACGCGGGAAGGGAACATAA	AACAAACCTGTTGTA
O1	ATGGTACCCGCCGAACGTGCATTCACGGCGGCTAAACGCGGGAAGGGAACATAA	GACGGGGCGCCCC
O1	ATGGTCAGACCACGGGCGCAGCCGTGATCGTGAAACGCGGGAAGGGAACATAA	AGATGCCCTCGGCCG
O1	ATGTCCGCCAGCTACTGGCCGGCCCCAGGATTCAAACGCGGGAAGGGAACATAA	GGGGTGCGGGCGAGG
O1	ATGCCCTTCGGGTTCTCGGCACTCCCCGGCCCGAAACGCGGGAAGGGAACATAA	CCGCGGGGGGGTGGC
A2	ATGAAATCACACGCCGACCACCCAGCCCCCCCTAAACGCGGGAAGGGAACATAA	CGACCAGCAGAGGCC
A2	ATGTATCGGTAGGCCTGCAGAAGGGGTGCGTAAACGCGGAAGGGAACATAA	CCACGTTCGGGGTAC
A2	ATGATTCGGATGCCGAGACGAAACCCCGCCAGGAAACGCGGGAAGGGAACATAA	GGCCCAGGTGGGGAA
A2	ATGATAGATGTCCCGTTGTTGGTCCCAATTCTTAAACGCGGGAAGGGAACATAA	GTGGCGACACCACGT
A2	ATGTGTTTGTAGTTTAAGGGGGCACTGCGGCTGAAACGCGGGAAGGGAACATAA	GTGGGCCGCAGTCAA
A2	ATGGTGGATCAGCCAGCATTCAGCCATCCCCGTAAACGCGGGAAGGGAACATAA	CGAGCCAGATGGGTC
A2	ATGGACCAGAATGGAACCCGGCAGTGCGCGTAAAACGCGGGAAGGGAACATAA	GGCAGGACGCAGCCG
A2	ATGGGCGGGTTCTCTCCGTGAACAGCCGTCGGCAAACGCGGGAAGGGAACATAA	GTGGCGGGGCGACAA
A2	ATGCTGGCCCCGTCAGCTCACAGCCCCGACCTCAAACGCGGGAAGGGAACATAA	CCATGTTACGCCCGG
A2	ATGATTCATAAGAGCGCTGACGTTCGGGAATCGAAACGCGGGAAGGGAACATAA	CGTTTGGGCACCAGG
A2	ATGTGTATGAACCGATGCCCCAGCGCGACCGCCAAACGCGGGAAGGGAACATAA	GCGAGCTATCAAGTG
A2	ATGATTACTCACTGATCGCGCGTATCCGCTGCAAACGCGGGAAGGGAACCTAA	AGATCGCGGCCCGGA
A2	ATGGTTGTGGCTACTGGTTCTAGACCGCTCCCCAAACGCGGGAAGGGAACATAA	CGCCCCGGCGGGGCC
A2	ATGTGGTGAGTGGCGGCGTGTGATAGGTTCCACAAACGCGGGAAGTGAACATAA	CTCGAAACGCCTGGG
A2	ATGCGGCCCCGACGCCCCTGCGGGTTCGGCCTCAAACGCGGGAAGGGAACATAA	GAGGCGGTCGCGCAC
A2	ATGTGGGATCCCTACTGCCCACCCCCATTCCCTAAACGCGGGAAGGGAACATAA	GCGTCGTGGCGTGGA
A2	ATGGAGGCCGAGGAGATAGAGATAACGATCGCGAAACGCGGGAAGGGAACATAA	GGGCGACGCGGGAGG
A2	ATGCGGGTCGGATAAGGTCGCTAGTCACTGGTTAAACGCGGGAAGGGAACATAA	CTGTGGCGGCGTTCG
A2	ATGAGTGGGACCCGTGGCGCGTGGGGGGCCGCGAAACGCGGGAAGGGAACATAA	GCGGCCGGGCACGGT
A2	ATGCCTGGGGGTGGGAGGCTGGGCAAGGAGTATAAACGCGGGAAGGGAACATAA	AGGCTGGGGTGCGTC
A2	ATGACGCTTTGGCTGGGCGGAGACGTCACAGTCAAACGCGGGAAGGGAACATAA	CGAGGCGACCGAGAT
A2	ATGTCCTGGGGACTGGTCCCTGGAGGACAACCGAAACGCGGGAAGGGAACATAA	CCAGGGCCCGAGACT
A2	ATGCAGCACGGGGTTCCAAGGCTAGCGCTCGGGAAACGCGGGAAGGGAACATAA	CACGGATCAGCGCA
A2	ATGATAAAAGCAGAAAAAGAAGAGTCGCACCAGAAACGCGGGAAGGGAACATAA	GGTCGACGTCGTGCA
A2	ATGGCAGTAGTTGGATCGGGAGGGTCGGCCCCGAAACGCGGGAAGGGAACATAA	CGGACCTACCTGGGG
A2	ATGGACAGAGACCGAACATGACCAGAGCTCAGCAAACGCGGGAAGGGAACATAA	CAAGCGTCGGCGGGA
A2	ATGTTGAAGTGGCGTGAACGCCACCGAGCACTGAAACGCGGGAAGGGAACATAA	CTGGGTGGAACCGGA
A2	ATGCGTCTTGTGGATGGCGGGCGAACCGCCGTCAAACGCGGGAAGGGAACATAA	TAGGTTGCGCCTGGC
A2	ATGGGTGGGCCTGACTCCCAGATACGTGAGAGCAAACGCGGGAAGGGAACATAA	AGAGGACGGGGGAAC
A2	ATGCCGACGAAGTAGCTAGCATCCCCAGACTTTAAACGCGGGAAGGGAACATAA	TCTGTGCGGTCCCTG
A1	ATGGAGGATTGCGCATGCTTTATCGTGGCCGCTAAACGCGGGAAGGGAACATAA	GGGCCCAGTGTACCA
O2	ATGTCGCGTCCCGCTGCGTCTCCGCCACCCTGTAAACGCGGGAAGGGAACATAA	TGTCCGGCAAGCGTC
O1	ATGTGGCTGCTTACGCCACCGCAGGTTGCGGGGAAACGCGGGAAGGGAACATAA	GTGGCAAGCATGCCA
O1	ATGCTTAATGTATCACCCGGAGCCCGGACTTAAAAACGCGGGAAGGGAACATAA	ATACAGCCTGAATCC
O1	ATGCGGCCTCCCGAGCCACCGAAAACTGCTCGTAAACGCGGGAAGGGAACATAA	GACTGACCTCTCGAC
O1	ATGAAACTAAGTTACGAGGCCGGGGCCACGTTGAAACGCGGGAAGGGAACATAA	GCACCGAGGCCACGA
O1	ATGATCAGTACGCTCGCGCGCCTCAGACGAGCCAAACGCGGGAAGGGAACATAA	GAACACTGCGGACCT
O1	ATGCCAGCATCGTGCATCGCGCCCGCGCGGTCTAAACGCGGGAAGGGAACATAA	GCGGAGGGTCCTCGC
O1	ATGCCGCGTGGTGCCTTTAGCCTCTGAGCCCGTAAACGCGGGAAGGGAACATAA	GTAAGTTAGCGATTA
O1	ATGCGCAGCCGACGTGTCACCAAACTCGCGGGCAAACGCGGGAAGGGAACATAA	GCGGGGGGCAGGGCG
O1	ATGCGTCCTTACCGTCTGCCCCCCGCCTTCGTCAAACGCGGGAAGGGAACATAA	GGGCCACGACCCCGG
O1	ATGGCGGCCGCCCAGCGCCGCGCACTTTTCCGGAAACGCGGGAAGGGAACATAA	CCGGGGGGCGCGGGC
O1	ATGCCCCCCCTGTTCGCCGGCCAGGCACCCCGCAAACGCGGGAAGGGAACATAA	TGGGGGGGCGGGGAA
O1	ATGCCTGTCGCGCCAGGCGGCGCCACATCTTCCAAACGCGGGAAGGGAACATAA	ACCGGCGAAAGCCTA
O1	ATGCCCAGTACCCACAGCGAGGGCGCTCCCCCCAAACGCGGGAAGGGAACATAA	GTTGATGCCCGACTT
O1	ATGTAATTGCGGGCCCCGTCAGCACACCGTTGCAAACGCGGGAAGGGAACATAA	GCCCACGCACGTGCG
O1	ATGTGCTTCACTCAGCTCCCCGGTAGTTCCCGGAAACGCGGGAAGGGAACATAA	TCTGCCAAGCATTAT
O1	ATGAACCGGAGTGTTTAGCCACAGGCTGCAACGCGGGAAGGGAACATAA	TTGCCGCGTTTGGTG
O1	ATGAACAGGCATCTGTGCTACATACCGTAACTAAACGCGGGAAGGGAACATAA	CCGGACGACGGGTAT
O1	ATGTGGAAGGGTGCGTCGATACTGGCCTGGGGCAAACGCGGGAAGGGAACATAA	ATCGCCAACATCCGG
O1	ATGCCGGCCGACGTATGATACTGTCCGCCCGCCAAACGCGGGAAGGGAACATAA	GGGCCCGGTTGTGCC
O1	ATGGTGTAATCGACATGCTGCAGCACATGGAGCAAACGCGGGAAGGGAACATAA	TCGAACTGGCGCCGG
O1	ATGGAACGAAGCTGAGAGTTTCGACCCTCCGGTAAACGCGGGAAGGGAACATAA	GGTGCGGAGATCTGG
O1	ATGCTCGCACTTGAGGCAGGACCTGCTAGCCACAAACGCGGGAAGGGAACATAA	TCAGAACGCGCCTGC
O1	ATGGGGCCCGTCCCTTAGTCCATCTGCTTTACTAAACGCGGGAAGGGAACATAA	GGATGGCGTAGTGGG
O1	ATGCTGTAGTACGGGTCTTGGTCCCCCCATGAAACGCGGAAGGGAACATAA	GAGGGGAAAGACCCG
O1	ATGCCCCCCCGACCATCCAGACTGGCCCGGCACAAACGCGGGAAGGGAACATAA	GACCTATCGACCCGG
O1	ATGTGACCGCCGCCCGCCACACGGGGGCCCCTGAACGCGGAAGGGAACATAA	TGCGATGGGGGGCTC
O2	ATGTAGCCCGCCTAGGCGCATCTGGCGCCCGGTAAACGCGGGAAGGGAACATAA	GAGACGACCGGGGAT
O2	ATGCTACCCGCAGGGCCGTGTGCCCGCTGCCGGAAACGCGGGAAGGGAACATAA	GGCCATGCGGGGCCC
O2	ATGTATGATCACGGCCCGGGTAGCCTTGCTTTCAAACGCGGGAAGGGAACATAA	GGGCCGGCGCCGGTG
O2	ATGCGCCGGTCCCCGCACGCTATAACAAACTCGAAACGCGGGAAGGGAACATAA	GGGCCGGACTGGGCC
O2	ATGTTCCGTTGCACGGAACGGTGATGCCGTGGCAAACGCGGGAAGGGAACATAA	GCAGAGCGCCGATTT
O2	ATGCACACTCCCGCCCGAGGGGCGGCGCCCTGCAAACGCGGGAAGGGAACATAA	GCTGGCGTGCCCCTA
O2	ATGTCTCATCCCGCCACCACGGCCCCCGGGAACAAACGCGGGAAGGGAACATAA	CTGGAAGAGTGGTCA
O2	ATGGAGATGTGTCTTTCTCGGCATGATTACCCGAAACGCGGGAAGGGAACCTAA	GAGAACCCACTGTGA
O2	ATGCCTGCCCACCGCTCTCCACTTCTCGGCCTGAAACGCGGGAAGGGAACATAA	CGCCCCCTCGCCCTG
O1	ATGACGTCCGCCGACGGGCCCGCTGCACCTAAACGCGGGAAGGGAACATAA	GCAGAGACGAGCTGG
O1	ATGACCCTCGGTGGGATCCATTGCCCACGTACTAAACGCGGGAAGGGAACATAA	GGCCATTCTTACAAT
O1	ATGCGCAACCGGCGCTCGCGTATCTAGCTACCTAAACGCGGGAAGGGAACATAA	GGGGCGTGGTGGCCC
A2	ATGGCGTGGACGGGCGGGTGATTCCAGTGCCACAAACGCGGGAAGGGAACATAA	GCAGGACGGCCGGGG
A2	ATGACACAGAACAACCAACCAGCCCAGGCTCTCAAACGCGGGAAGGGAACATAA	GAGCGCAGCGGCGGG
A2	ATGGTAGGTAGGGGCGTGTATCAGTTCCTCCGTAAACGCGGGAAGGGAACATAA	GAGGGGCGAATTGCCG
A2	ATGACGGGGTGCGAGGGAGGCAAGCCGCGTTCCAAACGCGGGAAGGGAACATAA	TGACCGGGGTAGCTA
A2	ATGCAACGAAGGAGAAGGAGAACAAATAAAAGAAAACGCGGGAAGGGAACATAA	TTGTATCCGCTCGAT
A2	ATGAGGTTGGTGGTGGCCGGAGAGTGCGACCCCAAACGCGGGAAGGGAACATAA	GCGATAGCGCCCCCT
A2	ATGCCAGTTCGGTTTAGTCGCCACAAACGCGGGAAGGGAACATAA	TCCGAACGTGC
A2	ATGCGGTATCTAACCGCAACAACACCAGCGTATAAACGCGGGAAGGGAACATAA	AGAGTGCCCGGAGCA
A2	ATGCGTCTGGGCCATCACCTCCACCGTGTGTAAAGCGGGAAGGGAACATAA	GCCGAAGGCGCACTG
A2	ATGTGTCGTGGTGGGGAATAACGCGCCCACCGTAAACGCGGGAAGGGAACATAA	CCGGTATGGAGCGG
A2	ATGAAGACTCTGAAGTATAAACACACTCGCGGCAAACGCGGGAAGGGAACATAA	ACACCCGGGGAGCGC
A2	ATGGATGGCCTGCCGTGCCGCCGTATTCAGACTAAACGCGGGAAGGGAACATAA	CAGCGGGACAGCCGC
A2	ATGGGGTTGCAGGGGCAGGAGAACCCTATGTTCAAACGCGGGAAGGGAACATAA	CTGCCGGGGGACTTG
A2	ATGATGGCAAGGCCGGTCGTTACGGGATCGCGGAAACGCGGGAAGGGAACATAA	AGTATAGCTCTCGGC
A2	ATGAGATTGATGGGTGGGCTGCGACACCCCCGCAAACGCGGGAAGGGAACATAA	GCCAGGGAGCGAAGG
A2	ATGTGGTGTACCGGAATAGGTCATCCGACTTTCAAACGCGGGAAGGGAACATAA	TCGGGGCGGAAGGGT
A2	ATGAGGTAAAAGGAGGGAGATGACCGGTGGCCTAAACGCGGGAAGGGAACATAA	CCGCATGACCGGGGC
A2	ATGCGCGTCGTCGCATGCTCCCGCCCTAAACGCGGGAAGGGAACATAA	CCGCATCAACGGAGC
A2	ATGATGAAAGCTAAAGTAGTCCACCCCACGGGGAAACGCGGGAAGGGAACATAA	ATGGCCGGCGATGGG
A2	ATGTTTTATATCATTATTACACATCATGCGTGGAAACGCGGGAAGGGAACATAA	GGTGCGGCAGGGGCG
A2	ATGATTAAAAAAACAGGCGCACAAGCGAGGAGGAAACGCGGGAAGGGAACATAA	ACAATTCGTGGTGG
A2	ATGACAACAAACGCTAGTATGGGCTCGCCGCGGAAACGCGGGAAGGGAACATAA	GCAGGGCCACGCGCC
A2	ATGTCGGTGTTCGCCGCCGGCCACCGGGAGGGTAAACGCGGGAAGGGAACATAA	ACGCGAGGACGCCGC
A2	ATGTTCACTAATCTCATTTTGACAGCGGTGACGAAACGCGGGAAGGGAACATAA	GCCCATAGGATGAAC
A2	ATGAACGTGTTTTTAACTTGAGACATCAGGAGCAAACGCGGGAAGGGAACATAA	CACCGAGGCGACGGA
A2	ATGCCCAAACAGGCGCACTAACGCGCACCGGAAAAACGCGGTAAGGGAACATAA	TAACGTCGCTCCTGA
A2	ATGGAATGAGAGCAGCCTTTAAAACGTTCCGCCAAACGCGGGAAGGGAACATAA	AAAGGGGACGTCCGC
A2	ATGGTGGCTAACCTTCTCAGTTACTGAAAAACGCGGGAAGGGAACATAA	GCCGGTGCGTGGGAC
O2	ATGTAATCCAGACGCCTTCAGATCTGTGCTCACAAACGCGGGAAGGGAACATAA	CGGGATGTGGCGTCT
O1	ATGCTCCGCCGGCGCTCCGACCCGGGTCCGTGAAACGCGGGAAGGGAACATAA	TACTTACTCAACCTC
O1	ATGCTCGGAGGCCGGGCGGGGTGGGGGCCTGCGAAACGCGGGAAGGGAACATAA	ATCAGCAAAGGACCT
O1	ATGAGATCGTCCCATCCGCGGCACCGTGGCACGAAACGCGGGAAGGGAACATAA	TTAGCCCGAAGAGCT
O1	ATGGGTCCTAGCAACCCCCCGGCCCATCTTGTTAAACGCGGGAAGGGAACATAA	GTTCCGCGGCGATTA
O1	ATGGGGCCGTCGACGATACTCGGTGCTAGATCTAAACGCGGGAAGGGAACATAA	CCGGTTAATTATCCG
O1	ATGCGGCCCCTCCTAGTCCGTGATTTCTGGGGTAAACGCGGGAAGGGAACATAA	GGGCGGGGAGGCCA
O1	ATGCCAGTACCGCCCCAACCGCTCTCGTCGAAGAAACGCGGGAAGGGAACATAA	TTTTGTAGTCGTTAA
O1	ATGCCGCACCACCGGCAACCGGACATTGAAGAGAAACGCGGGAAGGGAACATAA	ACCGTTTGTATACT
O1	ATGCGACGTGCTCGCCGGTGCTGGAAGTCTGGGAAACGCGGGAAGGGAACATAA	CTTTTGCTACCGGTG
O1	ATGCTCCGGCCACCGGCCGGACGGACTCCTGCTAAACGCGGGAAGGGAACATAA	CAACGGAATAATTGT
O1	ATGCGCAGGGGACCGCGGTCTGGCCCATATAGTAAACGCGGGAAGGGAACATAA	AACAGCGCCCCTG
O1	ATGCTTCCGTCACTCTCGAGGGGAGCTGCCCGTAAACGCGGGAAGGGAACATAA	CGAACTCCCGTGCTG
O1	ATGGACGCGGGCGCCGAGCGGCGGGGCGAACCCAAACGCGGGAAGGGAACATAA	GGGGACGGGCTAGCC
O1	ATGGGCGGTATCCCTTGAGCGGACGACCGGGTCAAACGCGGGAAGGGAACATAA	TCTGACCATATT
O1	ATGTTACCAGGCCTTCGCTGCCTGCTGTCTCTTAAACGCGGGAAGGGAACATAA	GTCATCTCTGCTATC
O1	ATGTTTCGCGGTCACTTGTCGCGAGGGCGCGGCAAACGCGGGAAGGGAACATAA	GTAATCTCTGCAACT
O1	ATGCGATCCAGCGCGCCTTGCGCCCCCCTTAGGAAACGCGGGAAGGGAACATAA	TCTTGAATGGTTAAC
O1	ATGGCGAAGGGGCATCTCTCCGGAGCCCATAACAAACGCGGGAAGTGAACATAA	GGTGTGGCACGCCGC
O1	ATGGTACGCACTGGCCGAGGGCTGCGTCTCAGTAAACGCGGGAAGGGAACATAA	GGTAGGAATGCTCTC
O1	ATGAATCTCCCCGGCGCCCGAGCCGGCCCACCGAAACGCGGGAAGGGAACATAA	CTTGGTATACGTTAA
O1	ATGCGGACCTTGTCTCGTTCTACTGGTGGGTCCAAACGCGGGAAGGGAACATAA	CGGCCGTCGGCACTC
O1	ATGCTTCTTGCCCTATGCCGCCGGTGCGCTTTCAAACGCGGGAAGGGAACATAA	GGTGGCCGGCGACTT
O1	ATGACTATTTCGATTCCAGTGTTAGCTACCCGGAAACGCGGGAAGGGAACATAA	GGAGGCGCGGGTCT
O2	ATGGCGTACATTGCGGTGAGGGCTGGTCCCCGCAAACGCGGGAAGGGAACATAA	GGGGCGGACGCGGAC
O2	ATGTCCGCTCGGGCCGGCACCCGGCAACCCGTGAAACGCGGGAAGGGAACATAA	ACCGTCGGGCCGCCC
O2	ATGCGCGAACTATCTTACGACAGATATTCATCAAAACGCGGGAAGGGAACATAA	AGGGGAGGAGAACAG
O2	ATGCACGAATTGACCCGTGCTCGAAGGCGCCAGAAACGCGGGAAGGGAACATAA	CGACGGCCCGAGGGC
O2	ATGCAAGAGCCGCCAAGCTGCCTACTCTTGGGTAAACGCGGGAAGGGAACATAA	GCCAAGCGCGAGAGA
O2	ATGCTTTTCACAGGGTGGGCAGGGCGTTGATACAAACGCGGGAAGGGAACATAA	CCGGGCTAGGCCAGC
O2	ATGCTTCCCGTGAGTGCCCCTATGCCGCTACACAAACGCGGGAAGGGAACATAA	GGGAGGGAAGGGCGG
O2	ATGATAAACTGATGGACTGCAGTTAATCGGCCGAAACGCGGGAAGGGAACATAA	GAGGTGGGCTCCGAC
O2	ATGTTTAGTATACTTAATCGAGAGACCCAGCCTAAACGCGGGAAGGGAACATAA	AAACGGCAAGCCGGG
O2	ATGGCGATACTGAATCTTGCGAATTCGCCCACCAAACGCGGGAAGGGAACATAA	GGCAGGACATGTGCG
O2	ATGGGCTGTCACCGGCCACTCCTCGCAGCTCCGAAACGCGGGAAGGGAACATAA	GGGGGCCACTCCGGG
O2	ATGAGCCTGCTTATGCCGCCTGTCCCCGGCATCAAACGCGGGAAGGGAACATAA	GGGGCAGAGCGCGGG
O2	ATGGTATAGTCGCTAAAGCCTTCGCCGGGGTATAAACGCGGGAAGGGAACATAA	ATAAGGGATTCCGTA
O2	ATGTTTTCTGTCTGGCGTCATGGATATGGCGAGAAACGCGGGAAGGGAACATAA	GGAGCACCTCAAGAG
O2	ATGCGTCGCGCCGGTATCCCACTGGCCCGGTCCAAACGCGGGAAGGGAACATAA	CCGGTTCCCCCGGG
O2	ATGCGCGGCGGCCGGCCCCCGGACTGGCATTGCAAACGCGGGAAGGGAACATAA	AAGCGCACCCGCGCC
O2	ATGCCCCTTGGCCCGTTTCCGCCGGCGAACCAGAAACGCGGGAAGGGAACATAA	CGGATAACATGCGAG
O2	ATGCCCTACCCCATCACGGAAAGTCCCCCCTCCAAACGCGGGAAGGGAACATAA	CGGATAAGCCTGTGC
O2	ATGCCTGTTGCGGGGCCTCGCCGGTTGGCCGCCAAACGCGGGAAGGGAACATAA	GGCTAGGCGGTGGGA
O2	ATGGGGACGCCGCCGACGCCTGCTGGGGCATATAAACGCGGGAAGGGAACATAA	AGGCAGGCGCGCCGA
O2	ATGCATCGGGTGTGGCTCTCCTATGTCGCCCCTAAACGCGGGAAGGGAACATAA	CCTGACGTGAGCTAT
O2	ATGCTGATCCTGCACCGAGCCACATTTATCCCTAAACGCGGGAAGGGAACATAA	CTCAGCCGTCGGGCC
O2	ATGCCGGCGTAGCACCTACACTTCCTCCCCTCCAAACGCGGGAAGGGAACATAA	CCCGGGCATCCCAAC
O2	ATGCACATAATGGCTAAGGCAGCCAATCTGCAGAAACGCGGGAAGGGAACATAA	CGACCCGTGGCGCTA
O2	ATGCTTTAGATCGATCCCTTCTATCCCAAGAAACGCGGGAAGGGAACATAA	GGGCCGCGACCGGGC
O2	ATGCCCTGCAGGGAACGCTCTTCCTGAGCGCAGAAACGCGGGAAGGGAACATAA	CCCGGATACAAGTGA
O2	ATGAGAGTAACGGATCGAAATTCGACTCGGGCCAAACGCGGGAAGGGAACATAA	CGGGACTGTATTAGC
O2	ATGCGCCTTGCGTATGGGTTGGCCCGTGCTCGTAAACGCGGGAAGGGAACATAA	GATTGGCGATCAGGC
O2	ATGGCCTGTCGCTACTATGCCGGAAAGCCAGGCAAACGCGGGAAGGGAACATAA	CTGCGCGCGGAAAGC
O2	ATGGCCCGAGCTCCTGGCGAGGGGCGCTTAGTTAAACGCGGGAAGGGAACATAA	CTAGTATGTGTTAAT
O2	ATGAGAGCGTCCTCGGCAACAATGCACCTCATGAAACGCGGGAAGGGAACATAA	CCCCGCAGGGAAGAA
O2	ATGGCCGGGATGGGACCTCGGCAGCGAGCCGAGAAACGCGGGAAGGGAACATAA	GGGGCGTCGGGGCGC
O2	ATGACCGGACTTACTCGGGCTCACGGTCGCAACAAACGCGGGAAGGGAACATAA	GGGCGAACGCCAGAA
O2	ATGTGGGGGCCAGAGGCCGACGCGTACACGCCGAAACGCGGGAAGGGAACATAA	ACGGTTCGTGAAAA
O2	ATGCTGTCCCGTGACACCCTCCCAATGGCTCTTAAACGCGGGAAGGGAACATAA	CAACCCCTCTGGCC
O2	ATGCGAGTCCTATGGCACCCTAGGCCCGGATCTAAACGCGGGAAGGGAACATAA	GCGTGGGTCGTGACC
O2	ATGTACCTACTGGGGCTCGTCGTTGGACATATCAAACGCGGGAAGGGAACATAA	GCGCGGGTGGCCGCC
O2	ATGCTCCCCTCATGTCGAGGGAACGTCAGATTTAAACGCGGGAAGGGAACATAA	CTGGATTCCGCCTTC
O2	ATGTCTTACACGACTCACGCACCTTCGTGCTATAAACGCGGGAAGGGAACATAA	CGCCGTAGCGGGGCC
A2	ATGACATCGGACTGGTCGGGAAGGGGGGCCATCAAACGCGGGAAGGGAACATAA	GCAGTCGCATGCGAG
O1	ATGCCCCCGGTCCAGCCTGCCTCCCCCGCTTGGAAACGCGGGAAGGGAACATAA	AATAGAGCCCCCGGT
O1	ATGCCCGGGACGGCCCACGGGCACTCGTTCTGCAAACGCGGGAAGGGAACATAA	CCACTCAAGATTCTT
O1	ATGCTTGCCAAACCGCCATGGCCCTATGGCGGGAAACGCGGGAAGGGAACATAA	AAAGACATTCTG
A1	ATGGCTTGGGTGGGCAGATAGTAACTACGATTAAACGCGGGAAGGGAACATAA	GGGGACGCCCGGGGC
A2	ATGGGGGGCCCCCGGGGCACATTGGCCCTTGGCAAACGCGGGAAGGGAACATAA	TCTCACCCCGGGGGC
A2	ATGTTTAAAACGCAAACGAGACACGCGTCAGTCAAACGCGGGAAGGGAACATAA	GGGACGCCCCCCTAG
A2	ATGGGGGAGCCCGGGGTACGACGGTCCCTCGAACGCGGGAAGGGAACATAA	GGCAGCGTATAGCCG
A2	ATGATTTAGGACGGCGTGTTGGCTACGCGTGGGAAACGCGGGAAGGGAACATAA	TCGGGGTCTCCACGG
A2	ATGATGGGTGGCACTGTAAAACCGCGGCCGCCCAAACGCGGGAAGGGAACATAA	TGTTCGAGTGGAGAC
A2	ATGAGTTTCCAGCGCATAGACTATAACCCCCCCAAACGCGGGAAGGGAACATAA	CTCGACGGTAGACCG
A2	ATGTCAAATTTCTCGTCATTAGCAGCGTGGTGAACGGGGAAGGGAACTAA	GTTGGGCGGGTTTCG
A2	ATGATGATTCAGTCCTACGATTGATAACCCCGCAAACGCGGGAAGGGAACATAA	GGGGGGCTCCGGGC
A2	ATGTAACTTCCGTATCCCACCATCTCAGACCCAAACGCGGGAAGGGAACATAA	CTGCGCCGACGTCCA
A2	ATGTGGTGTTTCGCATGATGGGGCGCTCTCGCGAAACGCGGGAAGGGAACATAA	GAGGCAGCTGCACGG
A2	ATGCCGTACCAGCACATGAAACACCAGGCGGTGAAACGCGGGAAGGGAACATAA	TGCCCCGGCGGGCGT
A2	ATGCTGAATGCGCGAACCACGACGCCCGAATTCAAACGCGGGAAGGGAACATAA	GCGCGAGAAGCGGCT
A2	ATGTCGCGGCGCGGGGGGTGCGCACCCCGCGACAAACGCGGGAAGGGAACATAA	GGCCCCGGCGATGTA
A2	ATGTTTTTTGGCATGGTTCCCAGTCTCCATCTTAAACGCGGGAAGGGAACATAA	GCTTACCCAAATAGA
A2	ATGGGTTACGCCCCGGTGGCGACGCCCCCCGGTAAACGCGGGAAGGGAACATAA	GCGGGCAGTTCAAGCC
A2	ATGGCGCTCTCTCCGCCGTCGTCCGGTGTGGTCAAACGCGGGAAGGGAACATAA	GGAGGCAAAGTCGCG
A2	ATGCGGCCCGGAACTCACGCGCCCGGGCGCTAAACGCGGGAAGGGAACATAA	TCCTGGGATGGATCC
A2	ATGATTCAGGTTCGTGGAAGGGGGACGGGGCCGAAACGCGGGAAGGGAACATAA	CCGGAGTTCGCAGGG
A2	ATGCCCCAGGCCCAACCCCATAGCTACGCCAGAAAACGCGGGAAGGGAACATAA	GTGTCCGAGCGAACC
A2	ATGATGAGGGATACAGATCGGCGCTGCTCCCGTAAACGCGGGAAGGGAACATAA	GGGGGGTAAGCGCCC
A2	ATGAGTCGGAGCTAGTAGCGCTGGGCCGCCCACAAACGCGGGAAGGGAACATAA	TGACGCGCTCGGGCC
A2	ATGAGGACTCAGGATGGACAGGGCCACAGGCGGAAACGCGGGAAGGGAACATAA	CGGGGGACAAGACGC
A2	ATGCCCGCTTGAAGACGAGACCAAGGCTTGTCAAACGCGGGAAGGGAACATAA	GCTGACGTCCCTAGG
A2	ATGGTATATGTGGCGGCCTTGACACCTCCCCCCAAACGCGGGAAGGGAACATAA	GCGCCCGGTAACCGA
A2	ATGGTTGAGCACCGGTTCGAGGCGCGGGGCGCCAAACGCGGGAAGGGAACATAA	ACACGGGGACCCGGC
O2	ATGGTAGCACGAGATGCGCCTGTTTAGATGTAGAAACGCGGGAAGGGAACCTAA	GATCTGGTGCTCGGG
O2	ATGGAGGTGCGCGGCGTTGCGTAGCGCGGCCGGAAACGCGGGAAGGGAACATAA	TCGCGCCCCATGAGT
O2	ATGCGGCTTAAGGCTCGCTCCTGGTACTGCCTCAAACGCGGGAAGGGAACATAA	CGCGCCGGGGAAGAC
O2	ATGAAAGTTGTCCAAAACGTAGTTTCACCAGCGAAACGCGGGAAGGGAACATAA	GCCGGGCGAGAGCCT
O2	ATGCACACTGGCGGCGTGCCGAGCGGCGGCTGCAAACGCGGGAAGGGAACATAA	GGGGAGGGGCGCACC
O2	ATGCCCTGCCAGGCCGCGCCCCGTAGTCACAGTAAACGCGGGAAGGGAACATAA	ACCCCTGCCAGTCGA
O2	ATGGGAGACAGCGGCCGCGTAGAGCAATAAACTAAACGCGGGAAGGGAACATAA	TTGGCGTACTTTAGG
O2	ATGCCCCGGCGGTAACGCGTCACGCCCTGTCCTAAACGCGGGAAGGGAACATAA	CCCGACGGATGAGTG
O2	ATGGCCCCCAGGGCCGCGATCCTCGACGGTTTCAAACGCGGGAAGGGAACATAA	CCGGGCCGCGGTCCC
O2	ATGGCGCGGACCCTTCGGGGGTGTGTAGCCTGGAAACGCGGGAAGGGAACATAA	CGCCAGACAAGCCGG
O2	ATGGACGGGTTCGCGCACCACCCCCCCGTTGTGAAACGCGGGAAGGGAACATAA	GCAGCAAAGGGTTCG
O1	ATGCGCCCGGACGCAAACTGCGCTTTCTCTCGCAAACGCGGGAAGGGAACATAA	CGTGACGGGGGGATG
O1	ATGCCCGCTCCCTTGCTACGCCGCGGCAGTGTTAAACGCGGGAAGGGAACATAA	GATTTTTAGTTTTCC
O1	ATGGACCAAGGTCCTCCCTTCGACCATGTTCTCAAACGCGGGAAGGGAACATAA	ATCAATACTGCGTTC
O1	ATGATTTGCGGCTCAGGGGTTCCCGAGGGCCCCAAACGCGGGAAGGGAACATAA	CATGCGGATCTTGTTA
O1	ATGGCCTAATCGACCGCGCGCGCCAGTCCCTCGAAACGCGGGAAGGGAACATAA	CGGGGACCGCGCGC
O1	ATGCCCCCGGATCGGTCGGGGCCACCGCCCAAACGCGGGAAGGGAACATAA	GGCTCGTTCGGGCCC
O1	ATGGGGCTCCTTTCCCCCGTCTACGCTTCACACAAACGCGGGAAGGGAACATAA	ATGGGACCGCTAGG
O1	ATGGCGGGCGTCGCCTCCCGTATCTCGACTTAAACGCGGGAAGGGAACATAA	CCCGAAGCCCCTGTT
O1	ATGGGAGGTCCGCTCGTACTAAGAGCCGAGCTCAAACGCGGGAAGGGAACATAA	ATCGATATTCGTGTT
O1	ATGCGCTCCTCGTGTGGGCACCTCCGACCCCCGAAACGCGGGAAGGGAACATAA	CGAAGAGGTACACTG
O1	ATGGCGGCGTAGTGATCGCGGGTGGCGACCCCTAAACGCGGGAAGGGAACATAA	CCGCAAGGCGCGCCC
O1	ATGGTCGCGGGCCGGCAATGGATGTCTGCACTCAAACGCGGGAAGGGAACATAA	ATGGACCCCTCGATA
O1	ATGGCCGCTGGCTCCCCCTCACGACCGCCATCCAAACGCGGGAAGGGAACATAA	GGGTAGGGCGGGCGC
O1	ATGTGCCCGGCGGGGCAGTTTGGCCGGCCCGGCAAACGCGGGAAGGGAACATAA	TCTATCCTCTACATG
O1	ATGGGCTGCTCCCCTCCTCGTTAGGTCTTCCAAACGCGGGAAGGGAACATAA	CCGGGCCGGGGCCGG
O1	ATGCTCCCTCTGCCTTCCATGCGCCCGTGGGGGAAACGCGGGAAGGGAACATAA	GACCCGGCGGACCGG
O1	ATGCGGTGGTGGAGCGCGACCCCGCGCGATCTTAAACGCGGGAAGGGAACATAA	TTTATATTCATTGTG
O1	ATGCTCCCCGCCGTGACTGCCGTCGGTCCCCACAAACGCGGGAAGGGAACATAA	GTGGCACCTCCGGTC
O1	ATGCGGAGAGCATCGTTTTGAGGCCCCGAACAACGCGGGAAGGGAACATAA	TTATCATCTCTGTGC
O1	ATGAGCGCTGCCCAGCTCCAGGTTATTTCGGCCAAACGCGGGAAGGGAACATAA	GGTGGGCACGTGCCC
O1	ATGCCCCCCGCGCGCGCGTCTGGCCCGCCTCCGAAACGCGGGAAGGGAACATAA	GCCGGCGTCCGGCGC
O1	ATGCCGTCCCCCCGGGCAGACTCTATCTTATGAAACGCGGGAAGGGAACATAA	GATACATACCTGGAT
O1	ATGTTCACCGCTACCCCCCTCCAGCGTTTCAGCAAACGCGGGAAGGGAACATAA	TTTAATTAAGATTTA
O1	ATGGAACTTGGTTCGCGTCCACAATGTCCCGCCAAACGCGGGAAGGGAACATAA	GCCGCGAGCGTAGGG
O1	ATGGCGACGGTCTGCCCCCCCGTCGCTTTGTTCAAACGCGGGAAGGGAACATAA	GTGGTTGTTCTGGCT
O1	ATGGCCGCTATGTGCTAGTCTGCACCTTGCGCCAAACGCGGGAAGGGAACATAA	ATGCTGCACTGATTC
O2	ATGCTTCCAGCCCGTCCACAAATTAGTCCTACGAAACGCGGGAAGGGAACATAA	GAGAACATCTCGGCC
O2	ATGCCGGGGGTCCCTTGCGCTCACGCGGGCGCCAAACGCGGGAAGGGAACATAA	GGGGGGGCCGGAATG
O2	ATGGGCTCATTGGGCCCCTCGGCAGCCTCGGGCAAACGCGGGAAGGGAACATAA	GTGGAGCCCCCACGC
O2	ATGCACATGCGGCACATCACTCTCCCTGCCAGGAAACGCGGGAAGGGAACATAA	CAGTATGTGTTCAGG
O2	ATGTTCCGAATGCGGCCACTTATGCCACGCTCCAAACGCGGGAAGGGAACATAA	GATCGCACCGCGAAG
O2	ATGTCGCGGCTTGCGCGACCAGTCCGGCGGGGCAAACGCGGGAAGGGAACATAA	GCCAAAGTGGACGTG
O2	ATGCCTGGAGACGCCCTACGCCCATCTGTTTTTAAACGCGGGAAGGGAACATAA	AGGAGCCGGCGCACG
O2	ATGGTACCGGAGAGACGTCGCCGCTGGGTTGCCAAACGCGGGAAGGGAACATAA	GGCGCCACGTGGCCG
O2	ATGCTGTCTTGCCTCTCCCATCCGTCGCGCTTCAAACGCGGGAAGGGAACATAA	TAGGGCGACGAGCGG
O2	ATGGAAAATAGGCAGTTTCACCAAACGCCGACCAAACGCGGGAAGGGAACATAA	GGCATGACATCCCAA
O2	ATGTCCTATTTTGTCCGGGGGTCTTTCGTGTAGAAACGCGGGAAGGGAACATAA	GCGGGCCGCCGCGAA
O2	ATGCCCGGGGTCTCTTGCTAGGTCACCTGAGCAAACGCGGGAAGGGAACATAA	CTTCGGTTTCATTGA
O2	ATGTAAAGGTCAGACACCTGAATAGGTTGTACGAAACGCGGGAAGGGAACATAA	AGAGGGCGCCGCCTA
O2	ATGGAAGCGGGACCCCGGGCCAGCAGTTCCGTGAAACGCGGGAAGGGAACATAA	GGGACCGCAAGGAAT
O2	ATGCTCGGGTCGCTACAGGGGCCTTGGGCGCAGAAACGCGGGAAGGGAACATAA	ATCATTCATCCCCGA
O2	ATGGGGGTCACCCTCCCGATCGTGCACTCCTAAACGCGGGAAGGGAACATAA	CCTTCAGCTTCTGCT
O2	ATGTATCCACGCTCCAGTGATCTCGCTAGTTCCAAACGCGGGAAGGGAACATAA	CACCGTGGTGCAACC
O2	ATGCTGTTAGGCACTGACTCGACGCTCCTCCCGAAACGCGGGAAGGGAACATAA	GGGACACGCCGTGGA
O2	ATGTTGAAGCTTCTGCGTCGAACGCGCGCTGGCAAACGCGGGAAGGGAACATAA	GGACCTCCGGCGTGA
O2	ATGCTCGTTGAATGGGCGCATGTCTCGGCATAAAACGCGGGAAGGGAACATAA	AACGATCCCAAGCCC
O2	ATGCGGATATAGAACTTTTACCACCCCGGTGTCAAACGCGGGAAGGGAACATAA	CTTTGTGCTGGAACC
O2	ATGTTAAAATCTACACGCCCCACTGAGACGGGCAAACGCGGGAAGGGAACATAA	TCCGGGCGACATGTA
O2	ATGGCGCGATTCGCTCGCCGGCCGCCGGGCGAGAAACGCGGGAAGGGAACATAA	GGACCGCCGGGAGCG
O2	ATGTGAGGCCGCATCGGCAGCGCCTCCACGCGCAAACGCGGGAAGGGAACATAA	TCAGGACGGGGCACC
O2	ATGCCGCCTCCGCCCGGGCCCGAGCCGACAGCCAAACGCGGGAAGGGAACATAA	CGGGCGAACGCACAT
O2	ATGCCCCTCGGCTATGCGGTATGGTGCAGGTGGAAACGCGGGAAGGGAACATAA	TACCCGCGTGTTGCT
O2	ATGGTCCGACGGGAACCCTCATTCAGTTCACCCAAACGCGGGAAGGGAACATAA	GAGGCCGAAGGGGTG
O2	ATGTGTCGATCGTCTATCGTGCTTTATTTGGAAACGCGGAAGGGAACATAA	GACGTGGGGGGATGG
O2	ATGGGTCGAATCCGGCAACACGACGAAGGTGTCAAACGCGGGAAGGGAACATAA	GGGCGAGGAACCGGA
O2	ATGGAATAAGCGGCGCGCCTGATTTGGCCGCGCAAACGCGGGAAGGGAACATAA	GGGTGCTGGTGCGGT
O2	ATGTTAACCACCCAAAACCGAGCAGACACGTAAAACCGGGAAGGGAACATAA	CAACCGCACGGGGGC
O2	ATGGGGGCGCTCCGCCACCAGTACGCCGGCCCGAAACGCGGGAAGGGAACATAA	TTGTCCTACCTTCTC
O2	ATGGGCCCGGGAACCCCCGGCGCAGGGCTCATCAAACGCGGGAAGGGAACATAA	TTCCGGGACTAGGCA
O2	ATGATATTCTGATTGACACAGCATGGTGTAGTTAAACGCGGGAAGGGAACATAA	CGGGCGTCACACTGA
A2	ATGTTTACTTCGATTACCGTAACGGCGTTACTGAAACGCGGGAAGGGAACATAA	GGAAGGGGCCCACGG
A2	ATGGGTGTTTAAATATAGTTGACCTCGGCGCGCAAACGCGGGAAGGGAACATAA	GAGTCGCCGAGCGCT
A2	ATGAACTCCGTCGCGCCACGGATGGGTTCGCAAACGCGGAAGGGAACATAA	CCATGAGACGGCGGA
A2	ATGGGGCACCCCCCTGCACCCGGCTATGACCGGAAACGCGGGAAGGGAACATAA	CGGCGAAGGGCGACC
A2	ATGGAGTCTTACTATTGAATTTGACTTTCGCGAAACGCGGGAAGGGAACATAA	CCGAACAGATGGTAA
A2	ATGTTTCATGTGCCCCGCCACCCACACTCACCTAAACGCGGGAAGGGAACATAA	AGAGAGAGTGGGCGG
A2	ATGATAAACAAAATAGATCCAAGCTTCATTGGCAAACGCGGGAAGGTAACATAA	GACGACGCGGGGCTA
A2	ATGTCGGACCATGTACCACAAGGGGCGGGGTCTAAACGCGGGAAGGGAACATAA	CTGGCAGCCGGGGCA
A2	ATGTATCAGTCTGCGCCTAAGGTACGTCCGTCCAAACGCTGGAAGGGAACATAA	GGGTGGGGTGCATGG
A2	ATGCCGTGCGTCCCCAGGGAGGGCCCGACCCCTAAACGCGGGAAGGGAACATAA	TTGCGTGAGACCCGC
A2	ATGGCGGTTAGCTCACGAACTACCGTCCCCGGCAAACGCGGGAAGGGAACATAA	GCGGGGCCTGGTGGC
A2	ATGAGGGAGCGTGTGGAGGGTGACGAGGGCCAGAAACGCGGGAAGGGAACATAA	GTCGCGAGCAAGACG
A2	ATGCCAGAGAACGACTAGATCATGCTTTTCTCCAAACGCGGGAAGGTAACATAA	GAGACAGATGGTGCA
A2	ATGGGTGGCCGCCGCTGTTACCCATGCGCCCTCAAACGCGGGAAGGGAACATAA	GGGGAGCGGCGGCCG
A2	ATGTTTTGTAAGTGAGGGCTACTCAGCGCCGTTAAACGCGGGAAGGGAACATAA	GCCATGGGGGCCGGC
A2	ATGATTTACAGGGGGAGGAGGGCGCGTGGCCTAAAACGCGGGAAGGGAACATAA	GACCACCCCGACGGA
A2	ATGAGTTGGTTTCTGGGCGTACACCGTGGATTCAAACGCGGGAAGGGAACATAA	AGGGGGACGCCCTGC
A2	ATGATCAACAAAATACGAAAAGCGCCCACACCCAAACGCGGGAAGGGAACATAA	CCAGGGCGGGCGCAC
A2	ATGACTGCACTCAGATCCAGACGGTAACGGTAAACGCGGAAGGGAACATAA	AGCGACCGCCAGCC
A2	ATGAAATGGGGGTGGTGATGTATACTGTAGTCCAAACGCGGGAAGGGAACATAA	CGGTGCCGCAGGAAG
A2	ATGCTACATTAACAACCCAACCAGCGACCGCATAAACGCGGGAAGGGAACGTAA	GGTCGGCGGCCCGGG
A2	ATGAAGAAACATTGCACGCGATCCCATGCGCGGAAACGCGGGAAGGGAACATAA	CAGGTCGGACACTTC
A2	ATGGTTTTGACCCCGCCGGCAGCACTCTTCGCGAAACGCGGGAAGGGAACATAA	CTAGGGAAGTCTTA
A2	ATGGTCAACCCCACCGCAGCCCCCCAGGCCAACAAACGCGGGAAGGGAACATAA	TCCGACCCCAGGGGC
A2	ATGCTAACTAAGTCACGGCACAACACGGCCCACAAACGCGGGAAGGGAACATAA	GACTCGCGCATGCCC
A2	ATGGACGCGCCGCGAGCGCGGCTGCAGGTCAAACGCGGGAAGGGAACATAA	TGCATAGATCACGAA
A2	ATGATCAACGAGAACACATTCATATACACCGCGAAACGCGGGAAGGGAACATAA	AATATCTGAATCTTC
O1	ATGCCTCCGCCTTCGCCGCGTCCCGGCCAAGCTAAACGCGGGAAGGGAACATAA	GCGCGCACCCGGAGC
O1	ATGCCACCCGCCGGGCCCCCCCTGCCAGTGAGCAAACGCGGGAAGGGAACATAA	GGACCCCGGTTCCGA
O1	ATGCGTGCACGGAAGGTCATGGCCTCCGCGACGAAACGCGGGAAGGGAACATAA	GGGGTGGCGCCGGGG
O1	ATGTAAATGTATCGGCCCCGTGCCCTTTCTTACAAACGCGGGAAGGGAACATAA	TTCTACATTGTTGA
O1	ATGGTTGGGTTGAGTACGGCCGTCCGCGTTTGCAAACGCGGGAAGGGAACATAA	AGGTTGTTTGATCCG
O1	ATGCTGGCGGAGGCCCGGCCCGGCTGCTCGCGGAAACGCGGGAAGGGAACATAA	GGGGGAGGAGGGCGA
O1	ATGTCAGAAGGGTGTTAGTAACGTCGCCCCTCAAAGCGGGAAGGAACATAA	AGGCGACAGCTA
O1	ATGGCACGCCGTCCCCCCCCGGGGCAGCTTAATAAACGCGGGAAGGGAACATAA	CTATGCTGTCACAGA
O1	ATGCAAGGATTCTAGCTGGGGTATACGGCCGCAAACGCGGGAAGGGAACATAA	AACGAATATACCCTG
O1	ATGTGCGGCGCTCTTTACGCGGCACCACCTCTCAAACGCGGGAAGGGAACATAA	GCGAGCAGCATCAAG
O1	ATGTGGTTCTCCGGACTGTACGGGTCGTGGTTTAAACGCGGGAAGGGAACATAA	CATCGACCTAAATTA
O1	ATGCCCTTGGGTCCGCACGCTAGTTGCCGGCCGAAACGCGGGAAGGGAACATAA	CCGGAACCCGTGGCT
O1	ATGGGGCCGCACCGTGCCGTGTGTCCTTAACCTAAACGCGGGAAGGGAACATAA	AGGCATCTGCACATC
O1	ATGTGGGTTAGCAGGGTCGGGTTTACGAAATCCAAACGCGGGAAGGGAACATAA	AGGGGGTATCCATGC
O1	ATGTACGGCATCATCGCTCGATCCGTTCGCCCCAAACGCGGGAAGGGAACATAA	TCTACATTTGGTTGT
O1	ATGTAAATGTTAGGGGCCCTTTGGCTACCTAATAAACGCGGGAAGGGAACATAA	CAGCCAATGCTGCGG
O1	ATGGGCCCGCGGGGACTTCGCCCGGCCCCTCACAAACGCGGGAAGGGAACATAA	TGCGGCCTTGCCCGT
O1	ATGATCAGCCGCAGCCCGTGCCTCTCAGGAGGGAAACGCGGGAAGGGAACATAA	GGCCCGCGGCAGCCG
O1	ATGCCGGTGGCACGGCGGCCGGGCACGTGGTGGAAACGCGGGAAGGGAACATAA	GGCGGCCGGGGCACT
O1	ATGCGCTGCACCCTCCGGCGCCCCGTCCATCCAACGCGGAAGGGAACATAA	ACGAGATATGAATAT
O1	ATGGCCTGTGCAGGGGACGCGCTCGCGATGGCCAAACGCGGGAAGGGAACATAA	GGGGGGGCGGCGCGG
O1	ATGTAGTGCCAACTACGCCGGCGGTACCGTGGCAACGCGAGAAGGGAACATAA	CCAACAGTTATCGTT
O1	ATGTGTCTGGCTCCAACGCACTCTCTCTTTAGGAAACGCGGGAAGGGAACATAA	ATCCACAGACACTCC
O1	ATGGATAGGCGTCCCGGGCTGGTCCGCTGACTTAAACGCGGGAAGGGAACATAA	ATTAAACACCATTT
O1	ATGGATGGTCATGCGGTTTCGGGCGCCCGTTCCAAACGCGGGAAGGGAACATAA	GGCAATCATGAGCTA
O1	ATGGGTCTCGCGAGTCTACGTTCACGGGGCTCCAAACGCGGGAAGGGAACATAA	GACACCAAGAAGGGG
O1	ATGGGGGCAGCCGGCCCTCCCCTCCTCCGCGACAAACGCGGGAAGGGAACATAA	GATCAAGCAACCGGT
O1	ATGGGATTCGGGACCCCGCGCGCCCTTGGTGAGAAACGCGGGAAGGGAACATAA	GGCCAGCCCGGCGGA
O1	ATGGATCCTAGTGGCTAGTGTTCATCTCCAAGTAAACGCGGGAAGGGAACATAA	GGGGCGGGGACCGCG
O1	ATGTGCCGACTGGCCGGCCGCCACCCGGTCAAACGCGGGAAGGGAACATAA	GCCGCCAACAGATGT
O1	ATGCCGTCCGTTTTCCCGGTTCGCTTTGCCGTGAAACGCGGGAAGGGAACATAA	GGGGCGCGGCCAGGG
O1	ATGCTCCCGGGCCCAACCGGTGCAAGTTTTGACAAACGCGGGAAGGGAACATAA	TTAAAGCCACCCTTT
O1	ATGCAAGCTCGACGTGCCTCCTAACATCCGCCAAACGCGGGAAGGGAACATAA	ATTTTTGTGATCACC
O1	ATGAACGCCTACATTCACCCGCGCCTCGGCTTCAAACGCGGGAAGGGAACATAA	AATTTATAACAGCGT
O1	ATGGGGTGCCGCACTGCGCGTCACTTCGTTCCTAAACGCGGGAAGGGAACATAA	TGAATGACGAAGCCC
O1	ATGCCCATTTACACATCCCCTTGCTGAAGAACAAACGCGGGAAGGGAACATAA	CTGGCCGCGCCTTGC
O1	ATGCACGCGGATGAGGTGTTTATGGAAAACGGTAAACGCGGGAAGGGAACATAA	CGGGGTCGGGCAGGT
A2	ATGGGTCGTGGAGCCCTTGGGTCCCAGGCGGTCAAACGCGGGAAGGGAACATAA	CTTGGCCGGCGGTGG
O1	ATGCGGTCGGAACGCATGGGCCGCGCCGCATGTAAACGCGGGAAGGGAACATAA	GAGGGCGATCCTATC
O1	ATGTGTGAACCTCTCAGTGTCGACGCTTTTTCAAAACGCGGGAAGGGAACATAA	TGTTTAGACCCGGTT
O2	ATGGGAGGAGCGGGGTGACCCGTGCCGTTCACCAAACGCGGGAAGGGAACATAA	TTCCGGGATTTTTA
O1	ATGCGTCGGGCGCTCTAAAATGTCCGAGGGGTCAAACGCGGGAAGGGAACATAA	GCGGGGGGTGGGCTG
O1	ATGCCCGGCATACGTCGCGTTTCCTCAGTTTAAACGCGGGAAGGGAACATAA	GCGGCCGGCCCGGGG
O1	ATGTGCGGCCGACCCCAAGCTTTGCCTACCTGCAAACGCGGGAAGGGAACATAA	GAGTGGCGCAGGCAG
O1	ATGCCGGGCTCATCGCCCGTGCCCGACGGTTTCAAACGCGGGAAGGGAACATAA	GGTTGTGAAATTACC
O1	ATGAAAGCCCTTGACAGTCCCGACCGTCATTAAAACGCGGGAAGGGAACATAA	ATGTAAGATCATTAC
O1	ATGTACATGTCCGAGCCGTCAATGCGATTGGCTAAACGCGGGAAGGGAACATAA	TATGTGCATGTGTC
O1	ATGAGCGCCGCCGATCCGGGTGATCGCCGGCTGAAACGCGGGAAGGGAACATAA	ATGGTTTGGCGGATA
O1	ATGGATCGTCGGAGGCCTTACACCCCCACCTGAAACGCGGGAAGGGAACATAA	AAGCTTAAACATTA
O1	ATGCACGCCTCGGGTACTTCGGCTCAGCGTTTCAAACGCGGGAAGGGAACATAA	TTCCGACAAGGTATA
O1	ATGGTCCCGACCCAATCGCCCCAGGTGATACCCAAACGCGGGAAGGGAACATAA	GGGGGCTTTGGCTTA
O1	ATGCCCGCGCCCGGGTTGCGCCAAACACGGGCGAAACGCGGGAAGGGAACATAA	ACCGCCCCGCGGGCT
O1	ATGGTCGGTCCATTTTCCGCCATCTCTCAAGGCAAACGCGGGAAGGGAACATAA	GTCGCATAAACACCC
O1	ATGCTGATGGCCCGCCCGGCCGCCGGTTGCCTTAAACGCGGGAAGGGAACATAA	AGTGTGGGCCCGGAG
O1	ATGCGACATATACAGAGTTCCGCTTGTGTCCCGAAACGCGGGAAGGGAACATAA	TTCAGAGTTCATATG
O1	ATGTGGCGGGCCTTCCAGCCCGCCCCTGTCAAAAAACGCGGGAAGGGAACATAA	CGAATACGTTCCTTT
O1	ATGGGCCTGTTGTCCTCTGAGAACGTTCCTCACAAACGCGGGAAGGGAACATAA	GCCGCTACTGCACGC
O1	ATGGACGCGGGCATCCTCGGCACTGACGGCGCCAAACGCGGGAAGGGAACATAA	AATTTACCTATCTAC
O1	ATGAGCCAGCGACCTTCCAGTGGCGCCTAGCCGAAACGCGGGAAGGGAACATAA	GGGGGCGGCGCACGG
O1	ATGGCGGGGCGCGACGCCCCCCAAAGCCTTTACAAACGCGGGAAGGGAACATAA	GATGTCGATCTATTA
O1	ATGGTGGGTTCGGCATCTAGCCCGGCCTAGGCCAAACGCGGGAAGGGAACATAA	CGGCAAAATTTGTCA
O1	ATGCCCGGTCCCACCCCCTGTCACCACTTCCTGAAACGCGGGAAGGGAACATAA	GGGCGGGGGGTGCGG
O1	ATGCCGCTCCGACTGTCGCCAAGTCGACGGTCCAAACGCGGGAAGGGAACATAA	GAATCGAAGCTATTC
O1	ATGTGTATCGATGTAACATCGTCTGGCCCTTTTAAACGCGGGAAGGGAACATAA	GCCGCCGCCGCACGT
A2	ATGCGGCGGGGCGGGCCGAGTTTAGGCCGTTAGAAACGCGGGAAGGGAACATAA	GGTGGGGGGCGAGGC
A2	ATGTGAGTGAGTTCAATCACGAAGATAAAGAAAAAACGCGGGAAGAGAACATAA	ATAGCGACGACAATC
A2	ATGTTATTTGATAGGTGTTGTAGCGGGCGCGCCAAACGCGGGAAGGTAACATAA	GGGCCGCGGCTGCGC
A2	ATGAGCGGAATTGGACGAGAACACCCCGCAGGTAAACGCGGGAAGGGAACATAA	CCATCAGGTTGCCAT
A2	ATGTGAAAGCACCGTTGCACGCACAGCATGCCAAAACGGGGAAGGGAACATAA	ACCAGGGCGAGAAAC
A2	ATGCGGGTGGACGCGGGGCCTGATCCGGGAGGCAAACGCGGGAAGGGAACATAA	GCGGGGCGAGGGTGA
A2	ATGTGTTTCCGCGGTTGCAGAAGTCACACGCTTAAACGCGGGAAGTGAACATAA	GAGGCGGACGGCCCG
A2	ATGACTTTATGCCCCAACGTATAATGCGCACGGAAAGCGGGAAGGGAACATAA	GACAGACAGGGCGCA
A2	ATGGTGGATCGCGCCTCCGGCCGCGTCGTCCCCAAACGCGGGAAGGGAACATAA	GAGAACTGTCCCGCC
A2	ATGCCTAGTACGGGGAAGGGCAGACAATCTTAGAACGCGGGAAGGGAACATAA	ACGCAGGCCAAAGCC
A2	ATGGATGGGAGGTCAAAGGAAGACAGTAGACAGAAACGCGGGAAGGGAACATAA	CGGTTCCCTAGGGAC
A2	ATGATTGTAGAAGCCGGGGTGAGCCCGGCTTGAAAACGCGGGAAGGGAACATAA	AGGGTGGGCGCTAAG
A2	ATGGTTTGTGCGCCAGACTAAACGAGCCCTCCAAACGCGGGAAGGGAACATAA	GATACAGCGGCGTAA
A2	ATGCCCGGGCCGCCAGCTAGCACCGGCACCATGAAACGCGGGAAGGGAACATAA	CAGGGGCCGGCAG
A2	ATGACAACTCAGCGCCTCTCCCAACCCCACGGCAAACGCGGGAAGGGAACATAA	GGAAGCCCGAACCGG
A2	ATGAGCGAGTGTTGGAGTCCGTAAGTAAATGAAGCGGGAAGGGAACATAA	CGCTGCTCGACCGCT
A2	ATGTGTTAGGGCTCCAGGTGACCCGTCCCCCCCAAACGCGGGAAGGGAACATAA	CGGTCCCGCAGGAGG
A2	ATGATAAATAACGACTCAAAGGCATATCACCATAAACGCGGGAAGGGAACATAA	CCGTACGGACGGCTC
A2	ATGTTTCCGTCCCACCGGCCGCGACCGTCCGCAAACGCGGGAAGGTAACATAA	GTCGAGTCCGCACGC
A2	ATGCCTTGATAGCGCGGACCCACCGTGCGCTTAAGCGGGAAGGGAACATAA	GCGCGGGACGTGCCA
A2	ATGCGGCCCGCCCGCCCGCAGTGGGTGACCGCCAAACGCGGGAAGGGAACATAA	CCGCAGGGTGACTCG
A2	ATGCTGCAATTGCCCCACGATCAGTCCCACGCCAAACGCGGGAAGGGAACATAA	GCTCCTTTTCGAATT
A2	ATGTGCCGGCAGGGCACGCTTGGTCTCCATGGCAAACGCGGGAAGGGAACATAA	CAAGATTCGTTCATG
A2	ATGACAGAATAACGGGATAAACTAAAGCCCTCCAAACGCGGGAAGGGAACATAA	GCGTGGGGGTCGGAGC
A2	ATGTCTTATCTGCATTTCAAAGCACAAGCCCGGAAACGCGGGAAGGGAACATAA	GGAAGGGCATCCCCG
A2	ATGGCTCCGAATCAAGCGCAAGAGACTTGTACAAAACGCGGGAAGGGAACATAA	TTAATTCGTGGCCGA
A2	ATGGAAAATACTGACCACCGAAGCTAGCCCCAAACGCGGGAAGGGAACATAA	ACGCCCACCTAGCGG
O1	ATGCTGGCAAGCGTCCGTCCGGTCAGACGCGTTAAACGCGGGAAGGGAACATAA	TGGGCGGGGCCGAGC
O1	ATGCGCCACTCTGCGCGCGTTTCCGTTGGTCCCAAACGCGGGAAGGGAACATAA	GGGTGGTGAGGAAGT
O1	ATGACGATTCCCCTACTCGGGGACCGTTTATTCAAACGCGGGAAGGGAACATAA	CATCTTCAGGTATT
O1	ATGCCCCGCAGCGCCTCCCCGCGGCAAGTGGTTAAACGCGGGAAGGGAACATAA	GCGGGAGCCGGCTT
O1	ATGGTAGGTCCTCGGGCATCCTCATCCCTCGCCAAACGCGGGAAGGGAACATAA	GGCGCGGGGGCGCCC
O2	ATGCGCACCATCAGTTCGGCTGGGGGGATCCTCAAACGCGGGAAGGGAACATAA	TGAGTAGAGATGACC
O2	ATGCGGTATTGGGTGTCCCCTCGTACCTGCGCCAAACGCGGGAAGGGAACATAA	GGGTCAGCTCAGCG
O2	ATGGCTCTGCACGCGGACAGCTATGCACCCCACAAACGCGGGAAGGGAACATAA	GCGCGCTCGGCCAGT
O2	ATGCTGGGCCCGCGATCCTGGGCATCGCCGAAACGCGGGAAGGGAACATAA	ATGGGCGGTTACCGG
O2	ATGGACCCCTAGGCCCGCGGTCCCACCAGACGCAAACGCGGGAAGGGAACATAA	GTTCTCGGCGGTCGT
[truncated: 57,471 more rows]
