# Supplementary material for: Context specificity of translation inhibitors revealed by toe-seq
Source: Research Square preprint supplement (doi:10.21203/rs.3.rs-3832009/v1), 2024-04-03
Supplement: Supplementary file 9 [file cf7f159306a31c59df4fe0d1.xlsx]

## Sheet: Title
Supplementary table 6
Ribosome stalling sites, positional, amino acid and codon preferences of ribosome stalling sites, preferences of stalling at combinations of codons and corresponding amino acids in different sites and its significance for translation inhibition by TcmX.

## Sheet: Codon heatmap
Stop efficiency at the corresponging triplet in the -2nd position while mRNA codon with specified index number is located in the P-site													Stop efficiency at the corresponging triplet in the E-site while mRNA codon with specified index number is located in the P-site													Stop efficiency at the corresponging triplet in the P-site while mRNA codon with specified index number is located in the P-site													Stop efficiency at the corresponging triplet in the A-site while mRNA codon with specified index number is located in the P-site
-2		Index number of mRNA codon located in the P-site											E		Index number of mRNA codon located in the P-site											P		Index number of mRNA codon located in the P-site											A		Index number of mRNA codon located in the P-site
		4	5	6	7	8	9	10	11	12	13				3	4	5	6	7	8	9	10	11	12				2	3	4	5	6	7	8	9	10	11				1	2	3	4	5	6	7	8	9
P	CCC	-0.000859188	0.0019972	-0.00164296	-0.00227696	-0.00902077	-0.00420103	-0.00121615	0.0217987	-0.00243256	-0.00822405		P	CCC	0.00222547	0.00288567	-0.00540604	-0.00333857	-0.000362426	-0.00839122	-0.00804474	-0.00716843	0.0259113	0.00102752		P	CCC	-0.00275076	0.00429338	0.00573757	0.00325137	0.00364191	0.00111372	-0.00353779	-0.00153378	0.0078622	0.0441643		P	CCC	0.007729	0.00114431	0.00910964	0.00707204	0.011775	0.00837956	0.000663564	-0.00518844	0.00426225
P	CCT	0.0110172	-0.00298881	0.00898836	-0.000236283	-0.00549283	-0.00340802	-0.00143658	0.0270636	-0.00337266	-0.0102419		P	CCT	0.00379019	0.00182982	-0.000725662	-0.00104569	-0.00392272	-0.00733759	-0.0106695	-0.00710895	0.0197131	0.00083641		P	CCT	-0.0108185	0.00971449	0.00629858	0.00461288	0.00193881	0.00224715	0.00270433	0.00292666	0.0112437	0.0506621		P	CCT	0.00500048	0.00137553	0.0118955	0.011187	0.016639	0.00744169	0.00712602	-0.00362946	0.00447817
P	CCA	0.0170536	0.00241395	0.00838339	-0.00439927	2.75282e-05	-0.00659263	-0.00637799	0.0322111	0.000150866	-0.00384699		P	CCA	0.00871297	0.00313326	-0.00364338	-0.000938874	-0.00623694	-0.00724364	-0.00944009	-0.0096051	0.0229681	0.0067182		P	CCA	-0.0076224	0.00143985	0.00587332	0.00543616	0.0105847	0.000204491	-0.0116442	-0.00315232	0.00507966	0.0357558		P	CCA	-0.00123924	-0.0100173	0.0147856	0.0136112	0.0140449	0.0161216	0.00504615	0.00504417	0.00341174
P	CCG	0.0121777	0.00205739	-0.00355677	0.0005056	-0.00445604	-0.0046627	-0.00352484	0.0244261	-0.00480685	-0.00982226		P	CCG	0.0034564	0.00100638	0.0018574	0.00172862	-0.00378035	-0.0113555	-0.00938073	-0.00264098	0.0233926	-0.00222617		P	CCG	-0.00263426	0.00207989	0.0108451	0.00119329	0.00445507	0.00134287	-0.00205574	0.00068464	0.00205518	0.0434297		P	CCG	0.00629836	-0.00507977	0.00417502	0.0125216	0.00200872	-0.00410521	0.00411921	-0.00435695	0.00583206
L	CTC	-0.000709366	-0.00603006	0.00276779	0.000202784	-0.00729172	-0.00670203	-0.00779979	0.0325768	-0.00498484	-0.00891567		L	CTC	0.000122285	0.00352893	0.00710582	0.00858953	-0.00307036	-0.0100483	-0.00860066	-0.00517643	0.0656431	-0.000166007		L	CTC	-0.00418981	0.0132205	0.0126184	0.00409246	0.006366	0.00620732	0.000719941	0.000197694	-0.00159562	0.064043		L	CTC	0.000314829	-0.00618335	-0.0042515	-0.00401282	-0.00290142	-0.00601575	0.00350496	-0.0124506	-0.00881887
L	CTT	0.015171	0.00278782	-0.0134538	-0.0108182	-0.00768998	-0.00650838	-0.00322281	0.0408063	-0.00495665	-0.00817275		L	CTT	0.0107098	0.0119303	0.00786344	0.00825187	0.00557069	-0.0147798	-0.00725903	-0.00348968	0.0775415	-0.0058291		L	CTT	-0.00712771	0.00221977	0.00992557	0.00507923	0.00504241	-0.00178478	-0.0085167	0.00139488	-0.00711869	0.0628391		L	CTT	-0.0124014	-0.013983	-0.0124764	-0.00537711	0.00360177	-0.0109729	-0.0102572	-0.00828917	-0.0130897
L	CTA	0.00200872	-0.0104963	-0.00346759	-1.94163e-05	-0.00546809	-0.00589642	-0.00738493	0.0484483	0.00152493	-0.00615647		L	CTA	0.00773687	0.00839569	0.0085611	0.00896241	0.0184098	-0.00283354	0.000522312	0.00381367	0.0760843	-0.00331689		L	CTA	-0.0157321	0.0121729	0.0024419	0.0124539	0.00309164	0.00412263	-0.00975518	-0.0113863	0.000922031	0.0420165		L	CTA	-0.0275999	-0.0287595	0.00527354	0.0134526	-0.0228413	0.00293351	-0.0192547	-0.0266425	-0.016809
L	CTG	-0.00201035	0.00888111	-0.000119847	0.00400429	-0.000467502	-0.00474392	0.00127694	0.0479242	0.0011722	-0.0108205		L	CTG	-0.000372543	0.0137387	0.00136145	0.0111432	0.00361898	-0.00855896	-0.0129087	-0.00155336	0.0782731	-0.00226671		L	CTG	-0.00324354	0.0090466	0.0238525	0.0152072	0.0119832	-0.000343622	-0.00506655	-0.00300087	-0.00803557	0.0619966		L	CTG	-0.00637258	-0.00869897	-0.00196373	-0.00121818	-0.00106816	0.00454968	-0.018864	-0.00932962	-0.00795075
H	CAC	0.0175772	0.00248168	0.00559556	0.00588254	-0.00367141	0.00148934	0.00109694	0.0636581	0.00766162	-0.00482305		H	CAC	0.00664177	0.0100349	0.0106553	0.00633473	0.0158573	-0.00787232	-0.00351956	-0.00363951	0.0164724	-0.00267052		H	CAC	0.0066559	0.0366498	0.0211027	0.018558	0.0210314	0.00840191	-0.00427696	0.00066396	0.00779892	0.0647895		H	CAC	-0.00646137	-0.00996683	-0.00549344	-0.00224562	-0.00210507	-0.00586905	-0.00441542	-0.00712454	-0.012678
H	CAT	0.0245246	0.00851795	-0.00311766	0.00638144	-0.00461557	0.00640931	-0.00319164	0.0508123	0.00049667	-0.00688617		H	CAT	0.00452546	0.0140758	0.0137508	0.00214187	0.00462197	-0.00605724	-0.00119226	-8.28772e-06	0.017536	-0.00153431		H	CAT	-0.00178445	0.0243243	0.021702	0.0162109	0.0174285	-0.00159567	-0.00855883	-0.00366016	0.00873479	0.0634788		H	CAT	-0.0235377	-0.0188854	-0.00508109	0.000769448	-0.00451152	-0.00967629	-0.00162863	-0.0090425	-0.0120506
Q	CAA	0.00186321	0.0174395	0.00519355	0.00552245	0.000249705	0.00309917	-0.0103874	0.0522244	0.00509918	-0.01776		Q	CAA	-0.00351878	0.00486257	0.00921991	-0.00459003	-0.00206672	-0.00944318	-0.00372298	0.000831054	0.0169271	-0.00983892		Q	CAA	-0.000147805	0.00438205	0.0133851	0.0082216	0.0094329	-0.00204609	-0.00800628	-0.00647396	-0.0064505	0.0242061		Q	CAA	-0.0140591	-0.0141653	-0.000333262	0.00641867	0.00192052	-0.00429804	-0.00261652	-0.0036645	-0.00709412
Q	CAG	0.00661263	0.0216824	0.0201414	0.0173746	-0.00109608	-0.000761636	-0.00117189	0.0554982	0.0122275	-0.00757629		Q	CAG	0.0093787	-1.68414e-06	0.000426066	-0.00362107	0.00262803	-0.012155	-0.0022022	-0.00157639	0.0121988	-0.0039312		Q	CAG	-0.00527886	-0.00113942	0.00932701	0.0120802	0.00140612	-0.00193575	-0.00704704	-0.00980487	-0.00171677	0.0328065		Q	CAG	-0.0120642	-0.00829397	-0.00251462	-0.000614637	-0.00584641	0.00431482	0.00347582	-0.00940348	-0.00365546
R	CGC	0.00896362	0.00347406	0.00225607	-0.00471708	-0.0106242	-0.000774309	0.0012185	0.0447841	-0.0052544	-0.00526853		R	CGC	0.00419068	0.0116365	0.00590433	-0.00255063	-0.000453013	-0.00549858	-0.0041621	-0.00589571	0.112686	0.00468857		R	CGC	-0.0031556	0.00208298	0.00526635	-0.0004811	0.00645506	0.00169783	-0.0115765	-0.011315	-0.0116821	0.034689		R	CGC	0.00296716	-0.00368316	0.00923636	0.003538	0.00256101	0.000777908	-0.00466839	-0.00572105	-0.00480486
R	CGT	0.000244398	0.00158127	0.00104291	0.00420781	-0.012226	-0.00251615	0.00188752	0.0509256	-0.00418092	-0.00747007		R	CGT	0.00867596	0.00950029	0.00451324	-0.0090991	-0.00464911	-0.00542369	-0.00699163	-0.00320395	0.116605	0.0103586		R	CGT	-0.00921625	-0.00641583	0.00334462	0.00227579	-0.00445906	0.00644658	-0.011144	-0.00747803	-0.00979568	0.0226596		R	CGT	0.00881767	-0.0198057	0.00311227	0.00609246	0.00645447	0.000606983	0.00485918	-0.00418333	-0.00752007
R	CGA	0.00365706	-3.77205e-05	-0.00561713	0.00430068	-0.0121345	0.0027936	0.00212277	0.0368759	0.00272343	-0.000237845		R	CGA	0.0107384	-0.000716412	0.00125969	-0.000592197	-0.00817019	-0.0044889	-0.00385637	-0.00670561	0.0938199	0.00140753		R	CGA	-0.00520753	0.0100693	0.0111194	0.00131185	-0.001852	0.00389082	-0.0123489	-0.000912672	-0.0112444	0.0523272		R	CGA	-0.00180924	-0.00731392	0.0373344	0.0268389	0.0430653	0.0257599	0.0194944	0.0238508	0.0124644
R	CGG	0.0165177	0.00766606	0.00449269	-0.00141176	-0.00270066	0.000569271	0.00382939	0.0302488	0.00131937	-0.00873705		R	CGG	0.00862521	0.0097762	0.00200497	0.0051704	0.00478346	-0.00223113	-0.00413189	0.00167919	0.108601	0.0146403		R	CGG	0.00184183	0.003907	-0.00271416	0.00458	-0.00213385	-0.00283553	-0.00828329	-0.00500626	-0.01215	0.0283219		R	CGG	0.00714895	-0.00390714	0.0160381	0.0123705	0.00528096	0.00472227	-0.0001434	-0.00251204	-0.00632285
S	TCC	-0.00190528	-0.00144163	0.00191746	0.000359347	-0.00825035	-0.00690635	-0.000917565	0.0173535	0.00492302	-0.00744486		S	TCC	0.00248002	0.0099635	-0.00113429	0.000513569	0.00306881	-0.00626535	-0.00712508	-0.00620569	-0.00343505	-0.00272069		S	TCC	-0.00119136	0.00424499	0.00349697	0.000727572	0.00429311	0.00610856	-0.00406079	-0.00852957	-0.00123847	0.0316404		S	TCC	0.00263372	-0.000738321	0.00300122	-0.00215572	-0.00514706	-0.00257852	0.00753796	-0.0104583	-0.00718086
S	TCT	0.00416681	-0.0060995	0.00411707	0.00351577	-0.000900552	-0.00695679	-0.00181183	0.0269428	-0.00191466	-0.0045671		S	TCT	0.00590463	0.00421626	-0.0039919	0.0115176	-0.00544883	-0.00702817	-0.00175782	-0.0054043	0.00961981	-0.00337753		S	TCT	0.00127669	0.00162593	0.0143439	0.00353158	0.00453626	0.00215494	-0.00782874	-0.0016154	-0.00410154	0.0413374		S	TCT	-0.00576575	-0.0077644	-0.00656646	6.58933e-06	-0.0049981	0.00154698	0.00469117	-0.0124421	-0.0110191
S	TCA	-0.00470105	0.00653312	0.0063004	-0.000718087	-0.00484157	-0.00307495	0.00191229	0.0319149	0.0117927	0.00406257		S	TCA	-0.00280826	0.0221452	0.00275299	-0.00321428	2.29608e-06	-0.00709601	-0.0102015	0.00355125	0.00431431	-0.00811622		S	TCA	-0.0175336	-0.00371847	-0.00794022	0.00185136	0.00825052	0.00552791	-0.0112693	-0.00997105	0.00285088	0.0235177		S	TCA	-0.00233989	-0.0161884	-0.00538231	0.00676121	-0.00640692	0.00780616	-0.00129046	-0.0146289	-0.0110816
S	TCG	0.0127168	0.00622503	0.0118262	-0.00368028	-0.0163953	-0.00140009	-0.000916909	0.0291	0.00376003	-0.00637951		S	TCG	0.00262072	0.00502123	-0.00337616	0.00158783	-0.00685966	-0.00910173	-0.00165492	-0.00807884	-0.00312421	-0.00714424		S	TCG	-0.00206409	0.00642955	-0.00186389	-1.70819e-05	0.00157805	-0.000566111	-0.00331911	-0.00676869	0.00208929	0.0392294		S	TCG	0.0226778	0.0025166	-0.00252488	0.0133074	0.000333273	0.00179713	0.00107273	-0.0144751	-0.00746779
F	TTC	0.00106478	-0.011524	-0.00452018	-0.0148251	-0.00352978	-0.00686405	-0.00475883	0.0440559	0.00107221	-0.00444334		F	TTC	0.000943156	0.0124536	0.0124648	0.0119077	0.00379853	-0.00271825	0.00324329	-0.000972211	0.0352519	-0.00289813		F	TTC	0.00664229	0.0266309	0.0211433	0.0168124	0.0113875	0.0162747	0.00442047	-0.00493158	-0.00728414	0.0667699		F	TTC	-0.00119346	-0.0131632	-0.0116372	-0.00541338	0.000674557	-0.00749386	-0.00631691	-0.00987707	-0.00930974
F	TTT	0.0101779	0.00471102	0.00606355	-0.00664112	-0.00823872	-0.0105086	-0.00261763	0.0462393	0.00291836	-0.00282953		F	TTT	0.00600308	0.024103	0.0220559	0.0122509	0.0262277	0.00105253	0.000467919	-0.00473309	0.0467462	-0.00254035		F	TTT	0.0093626	0.0157324	0.0184661	0.0102206	0.00804636	0.0149123	-0.00154583	0.00761417	-0.00811747	0.0647732		F	TTT	0.000367783	-0.0134186	-0.0128557	-0.00179934	-0.00992255	0.00377875	-0.0108637	-0.00922958	-0.0190122
L	TTA	-0.0055484	0.00369933	0.00365586	0.00104597	-0.0137751	-0.00599807	0.000877865	0.0416828	-0.00168729	-0.0166324		L	TTA	0.0124481	0.0231966	-0.00215305	0.00591418	0.0135199	-0.00580628	-0.0184118	-0.00176626	0.0720145	0.0149358		L	TTA	-0.0102199	0.0102936	0.00966426	0.0240186	0.0193156	0.00945278	0.00675206	-0.0112168	-0.00607613	0.0577161		L	TTA	-0.011926	-0.0135269	-0.00780074	-0.0122313	-0.0187174	0.00241228	-0.00401667	-0.0157226	-0.0121459
L	TTG	0.0196632	0.00565795	0.00206704	0.00684429	-0.00325497	-0.00185013	0.00233288	0.0258248	-0.000800383	-0.00896398		L	TTG	0.00622186	0.0153557	0.00307895	-0.00614382	0.0025068	-0.00413045	-0.00722304	-0.00734076	0.0602363	0.0143611		L	TTG	-0.0166744	0.0158814	0.0150104	0.0131573	0.00898777	0.00347266	-0.00311264	-0.00634611	0.00388174	0.0639887		L	TTG	-0.00252964	-0.00167111	-0.00158875	-0.00821841	0.00300891	0.00453327	-0.00394958	-0.00452808	-0.00462903
Y	TAC	0.0129665	-0.000159061	-0.00359221	-0.00187311	-0.00248684	-0.0113757	-0.0020076	0.0429458	-0.00176083	-0.00890132		Y	TAC	0.00593494	0.0113346	0.0110307	0.00827616	0.0140657	-0.00487042	-0.00513044	-0.000862073	0.0485348	-0.00467578		Y	TAC	0.00566846	0.0222619	0.0334894	0.0148382	0.0127512	0.0156003	0.00434967	-0.00734998	0.0133131	0.100115		Y	TAC	-0.0162122	-0.0115835	-0.00413284	-0.00347793	-0.00526098	0.00121494	-0.0156442	-0.0196344	-0.0136287
Y	TAT	0.00909157	-0.00554795	0.00357593	0.00753055	-0.00551611	-0.00445742	-0.00345534	0.0453068	0.00107992	-0.00149401		Y	TAT	0.0055082	0.0182686	0.0147383	0.0151631	-0.0196198	0.0024052	-0.00499743	0.000186989	0.0389948	0.00257268		Y	TAT	-0.00188517	0.0182481	0.0289905	0.0181997	0.0289468	-0.00407535	-0.00717146	0.00421253	0.0183648	0.0608107		Y	TAT	-0.0272421	-0.0143901	-0.00941305	0.00256886	-0.0125417	0.00910439	0.00603373	-0.0242131	-0.00666054
*	TAA	0	0	0	0	0	0	0	0	0	0		*	TAA	0	0	0	0	0	0	0	0	0	0		*	TAA	0	0	0	0	0	0	0	0	0	0		*	TAA	0.00895511	-0.00721279	0.0464057	0.0729829	-0.00240957	0.0353667	0.0190559	-0.00879665	-0.00493706
*	TAG	0	0	0	0	0	0	0	0	0	0		*	TAG	0	0	0	0	0	0	0	0	0	0		*	TAG	0	0	0	0	0	0	0	0	0	0		*	TAG	-0.0145127	0.00551171	0.0497975	0.0606996	0.0467377	0.0246222	0.00856678	0.00745281	0.00914586
C	TGC	0.0138509	0.005288	0.0124719	-0.0119956	-0.00245266	-0.00886123	-0.00387999	0.033696	-0.00119555	-0.00489249		C	TGC	0.00791411	0.015179	0.00502479	0.00478677	0.00293737	-0.00416665	-0.00721263	-0.00976722	0.0072723	-0.00684445		C	TGC	-0.00897477	-0.00551203	0.00820332	-0.000753073	0.00364379	-0.00481699	-0.00733294	-0.00314665	-0.00527693	0.0233655		C	TGC	-0.00157416	-0.0114046	-0.0028339	0.00273486	-0.00798563	-0.00316088	0.00287163	-0.0138949	-0.0122559
C	TGT	0.0174847	0.0108081	0.00794683	0.00499088	-0.0121121	-0.00333096	-0.00726078	0.0352875	0.00305653	-0.0107074		C	TGT	0.00330909	0.00340529	-0.00264591	-0.00455958	0.00131324	-0.00287095	-0.00685943	-0.0103555	0.0158029	0.00040401		C	TGT	-0.0107917	0.00133058	0.00323136	-0.00585811	0.00417281	0.00600296	-0.0163101	-0.00662895	-0.0102738	0.0107861		C	TGT	0.00433158	-0.0014488	-0.00884143	-0.00173854	0.00500959	0.00130766	-0.00588241	-0.00995892	-0.00758436
*	TGA	0	0	0	0	0	0	0	0	0	0		*	TGA	0	0	0	0	0	0	0	0	0	0		*	TGA	0	0	0	0	0	0	0	0	0	0		*	TGA	0.0055297	0.00501004	0.0849412	0.0475074	0.0279652	0.0201462	0.0256297	0.0032813	-0.000129933
W	TGG	0.0131522	-0.000668492	0.00140888	-0.00469496	-0.00769489	-0.00228982	-0.0021029	0.0276081	-0.00411705	-0.00987847		W	TGG	0.00417844	0.00651175	0.0072948	0.00689906	0.00446426	-0.00407544	0.00369094	0.00481579	0.00659942	-0.000709186		W	TGG	-0.0143738	0.0133106	0.0117457	0.00036864	0.00766756	0.00671187	-0.00562208	0.00631574	-0.00574051	0.0579406		W	TGG	0.0157575	0.00574579	0.0272441	0.0188831	0.00629679	0.0144611	0.00587513	0.00228028	-0.00593567
T	ACC	0.0140288	0.0120561	0.00348934	-0.00303144	-0.00335217	-0.00287236	-0.00410702	0.0557102	0.00506086	-0.00450517		T	ACC	0.00376664	-0.0046817	0.00599279	0.00236035	-0.00423591	-0.00277548	-0.00635505	-0.00812363	0.0297724	-0.0079247		T	ACC	-0.00531549	0.0059191	0.00399394	-0.00241035	-0.000771947	0.00861946	-0.00911811	-0.00444811	-0.00601297	0.0225916		T	ACC	0.00666088	-0.00387249	-0.00478789	0.00151639	-0.000610335	0.00104011	0.00298651	-0.0115588	-0.00827388
T	ACT	-0.00301502	0.0112153	0.00496776	-0.00340037	-0.000417107	-0.00389936	-0.00304052	0.0742663	0.00538013	-0.00456227		T	ACT	-0.00274426	-0.006737	0.0182117	0.00598528	-0.00977698	-0.0114193	-0.00755507	-0.00467028	0.0258802	-0.00446388		T	ACT	-0.0261831	-0.00256479	0.00304237	-0.00376187	-0.00239149	-0.00894721	-0.0150965	-0.00697072	-0.00698957	0.0351104		T	ACT	-0.00456372	-0.0191	0.00386583	0.00473121	0.00199629	-0.00163418	-0.00545355	-0.0108284	-0.00742901
T	ACA	0.0112947	0.00744068	0.00750231	-0.00131057	-0.000140783	-0.0034887	-0.000567302	0.0662651	0.0139921	-0.00275532		T	ACA	0.00443084	0.00152583	-0.000662091	-0.00268323	-0.00261016	-0.00628673	-0.0111351	5.11768e-05	0.0328743	-0.00655452		T	ACA	-0.0119446	0.00377124	0.00391916	0.00639115	0.000617816	-0.00177657	-0.00863147	-0.00334065	-0.00101579	0.0156151		T	ACA	0.000317642	0.000591403	0.00422604	0.0105848	0.00454409	0.00214867	-0.0114366	-0.0136875	-0.00724748
T	ACG	0.0164099	0.00425977	0.0134055	0.00803239	-0.0038139	-0.00410434	0.000602411	0.0448394	0.00555378	-0.00264073		T	ACG	0.00756603	0.00973006	0.000508349	0.0016595	-0.000634606	-0.00419312	-0.007962	-0.0076873	0.0283813	0.00167027		T	ACG	-0.00105047	0.00385578	0.00438232	0.00214184	-0.00182457	0.00194136	-0.0068658	-0.0114254	-0.00928838	0.0232857		T	ACG	0.00816213	-0.00338694	0.00197055	0.0146418	0.0031203	0.00160436	0.00768251	-0.00806587	-0.010634
I	ATC	0.00339914	0.00399179	0.00848492	0.00330841	-0.00192103	-0.00896389	-0.00133406	0.0576016	0.000517733	-0.011123		I	ATC	0.00462007	0.0123846	0.010723	0.0139974	0.0108826	-0.0040861	0.000700086	-0.000863887	0.135536	0.00383741		I	ATC	-0.00696752	0.0134385	0.0127172	0.00315594	0.00776833	0.00385124	-0.00886967	-0.00528736	-0.00870254	0.0336859		I	ATC	-0.00417642	-0.00278192	0.000682648	-0.000813552	0.00212242	-0.000482807	-0.0105983	-0.00513513	-0.00656269
I	ATT	0.00458244	0.00318176	0.00118765	0.0154677	0.00716226	-0.00464118	0.00562233	0.0506333	-0.00547876	-0.000249649		I	ATT	0.00985139	0.0135063	0.00143472	0.00450769	0.0119104	0.000586664	-0.00264647	0.014066	0.123327	0.00015818		I	ATT	-0.0150571	-0.00588798	0.00136612	-0.00815751	0.00436213	-0.00556444	-0.00364551	-0.00208154	-0.00715171	0.0166453		I	ATT	-0.0117208	-0.0181194	-0.00544765	0.0115965	5.95082e-05	0.00299576	-0.00408074	-0.0111639	-0.00498396
I	ATA	0.0108701	0.00344636	-0.00575914	-0.00821584	0.00373538	-0.00438032	-0.00137108	0.0683505	0.00613303	-0.0105943		I	ATA	0.0120158	0.0230546	-0.00859967	0.00162785	0.0081126	-0.00104094	0.00152981	0.0127481	0.119225	-0.00167413		I	ATA	-0.0116233	0.0067364	0.0196402	0.00501601	0.0121883	-0.00871932	0.00306982	-0.0152507	0.0103396	0.0574326		I	ATA	-0.0336305	-0.0236037	0.00961787	0.0258839	0.0121897	0.0186233	0.00629728	-0.0105067	0.00375769
M	ATG	0.0105845	0.00514854	-0.000717447	0.00469756	-0.00825178	-0.0056706	-0.0112935	0.0337076	0.00392377	-0.0174318		M	ATG	0.00510025	0.0130931	0.00245347	0.00754168	-0.00233236	-0.00234662	-0.00693813	-0.0045362	0.0301555	-0.00347928		M	ATG	0.00168832	0.00390275	0.0191276	-0.00182213	0.0228809	-0.0100193	-0.00357275	-0.00176002	0.00090833	0.0538437		M	ATG	-0.00192396	-0.0224528	-0.00668888	0.00362206	-0.00319935	0.0118391	0.00301411	-0.0119316	-0.00783743
N	AAC	0.0121157	0.0218029	0.00105426	0.00718642	-0.00971734	-0.00535178	-0.000595511	0.0428049	0.0024788	-0.00545367		N	AAC	0.0116461	0.00504983	0.00727187	0.00781026	-0.0027975	-0.00210043	-0.00385377	0.00288119	0.0430088	0.00185756		N	AAC	-0.00841753	0.0095154	0.0165781	0.0129228	0.00326739	0.00814965	-0.00304895	-0.00262757	-0.00601224	0.0478147		N	AAC	-0.000123966	-0.0144782	0.00359995	0.0043851	0.0131304	0.00811001	0.00395851	-0.00395227	-0.0053108
N	AAT	0.0075372	-0.00261519	0.00482381	-0.000284625	-0.00719749	-0.00827869	0.00137385	0.0458145	-0.00686438	-0.0188337		N	AAT	0.00453849	0.00649435	0.00486565	-0.00727068	0.00104881	-0.0020802	-0.000741727	0.00664781	0.0456121	-0.00493647		N	AAT	-0.00264849	-0.000208145	0.0113527	0.00912676	0.00479689	-0.010467	0.00231574	-0.000491694	0.00279686	0.0383817		N	AAT	-0.00591838	-0.00946541	0.0140938	0.0236982	-0.00520577	0.0193187	0.0093565	-0.00703349	-0.00813672
K	AAA	0.0214522	0.00926367	0.000627328	0.00256647	-0.00219498	-0.00338597	0.00131327	0.0570121	0.0158047	-0.00622427		K	AAA	0.00878543	0.00946179	0.0085115	0.0124834	-0.0108666	-0.00913861	-0.000227208	0.00249326	0.120169	0.00992109		K	AAA	-0.0210988	0.00398861	0.000188444	0.00502126	0.00128598	0.0125131	-0.00302609	-0.016232	-0.00540545	0.0483426		K	AAA	0.000442934	-0.00540846	0.0190614	0.0461276	0.0371212	0.0230108	0.00771739	0.0156572	0.00620319
K	AAG	0.0140264	0.00956888	0.00147238	0.00575673	-0.00474844	-0.00971656	-0.000482947	0.0532388	-0.000227483	-0.0119796		K	AAG	0.00332785	0.0134121	0.000142624	0.0050816	-0.00418572	-0.00330113	-0.0100278	0.000932552	0.0869243	-0.00412205		K	AAG	-0.0193483	-0.00366283	0.00361863	-0.00413503	0.00486984	0.0143722	-0.0104305	-0.000948827	0.000323597	0.012429		K	AAG	0.0101992	0.000164344	0.0555484	0.0414222	0.0445968	0.0343979	0.0139681	0.0114337	0.013052
S	AGC	0.00388325	0.00584123	0.00575089	0.0047103	-0.00227457	-0.00934062	-0.00676077	0.0257893	0.00368916	-0.00483072		S	AGC	0.00254537	0.00703064	-0.00502505	0.00620599	-0.00138254	-0.00917712	-0.00188667	0.00342641	-0.00100028	-0.000235052		S	AGC	-0.00625096	0.00725665	0.0119691	0.00245463	0.00636611	-0.00228247	-0.00565132	-0.00738423	-0.00136961	0.0384822		S	AGC	-0.0072718	-0.0175799	0.00127168	0.0030609	-0.000218428	-0.00164439	-0.00745504	-0.00547491	-0.00777952
S	AGT	0.0044602	8.23972e-05	0.00119501	0.00467375	-0.000556185	-0.0057306	-0.00506228	0.0249546	-3.76452e-05	-0.0101232		S	AGT	-0.000157772	0.00129346	0.000606983	0.00559368	0.00524348	-0.00859403	9.92124e-06	-0.00346871	0.00505914	0.00448648		S	AGT	-0.00771002	0.00662027	0.00388441	-0.0155808	0.00104785	-0.00480205	-0.00649343	-0.0150043	0.00164916	0.0284548		S	AGT	0.0245026	-0.00682018	0.00831267	0.0339704	0.0204494	0.0129786	1.62091e-05	-0.00690904	0.00041805
R	AGA	0.0102025	0.0141314	-0.0131578	0.0054301	-0.00748785	0.00333757	0.00908347	0.0432375	-0.00356209	-0.0102171		R	AGA	0.0221769	0.00620752	-0.00116675	0.000155283	0.00156453	-0.00220031	-0.00408443	0.00619253	0.138598	0.0187696		R	AGA	-0.0236578	-0.00037709	-0.00220027	-0.00337073	0.00490157	-0.00415788	-0.00905536	-0.00399622	-0.0161262	0.0117227		R	AGA	-0.00308844	0.0019281	0.0468548	0.051053	0.0338817	0.0386083	0.0160555	0.00244768	-0.00387329
R	AGG	0.0143282	0.0030627	0.00582989	-0.00130528	-0.00946351	-0.000480453	-0.00185096	0.0383212	-0.00280871	-0.00443206		R	AGG	0.00853456	0.00639814	0.00423845	0.0108223	-0.00276155	-0.00306606	0.000252272	-0.00538003	0.0972696	0.0146631		R	AGG	-0.00112037	-0.00571866	0.00174017	0.00189888	-0.00233349	-0.0058888	-0.00178138	-0.00779255	-0.00843441	0.0239247		R	AGG	-0.00571883	-0.00551604	0.0358978	0.0255422	0.0148624	0.0115434	0.0249807	0.00874846	0.0150817
A	GCC	0.000539003	0.000226838	0.00459711	-0.000753505	-0.0108503	-0.00974345	-0.00541645	0.0218973	-0.00135406	-0.00834321		A	GCC	0.00320173	0.00250373	0.000629502	0.00204641	-0.000572079	-0.00829132	-0.00366762	-0.00646736	-0.00226382	-0.0059864		A	GCC	-0.00252134	0.00386884	0.010883	-0.00182191	-0.00559551	-0.00351616	-0.00827003	-0.00636786	-0.00512599	0.0189689		A	GCC	0.0105653	0.00531025	-0.00707061	0.00172469	-0.00150528	-0.000440655	-0.00432119	-0.00972625	-0.00691349
A	GCT	0.00947225	0.0109448	-0.00379536	0.00760514	-0.0119506	-0.0105722	-0.00303164	0.0276532	-0.00346174	-0.00721491		A	GCT	0.00659891	0.00678374	0.00184774	-0.000738016	0.00119841	-0.00975853	-0.00245528	-0.00584706	-0.00168603	-0.00843139		A	GCT	-0.0130272	0.00517416	0.00801527	0.00377972	-0.0091314	-0.0018685	-0.00503175	-0.00508954	-0.00485948	0.0182364		A	GCT	0.00690603	-0.00307276	0.00517296	0.000759013	0.00624028	0.00105723	0.00136991	-0.00773712	-0.00892688
A	GCA	0.00890343	0.0109704	0.00550813	0.00501003	-0.00617091	-0.00301778	0.00627424	0.0218011	0.00210115	-0.00440064		A	GCA	0.0041966	0.0113892	0.00922658	0.0083968	0.00993116	-0.00521896	-0.00495367	0.00716981	0.003369	-0.0102273		A	GCA	-0.0104977	0.000205129	0.00463582	0.00571611	0.000902855	-0.0126297	-0.00974584	-0.00972373	-0.00317669	0.00037941		A	GCA	0.00564847	-0.0157672	-0.00283924	0.00705942	-0.00179189	0.00162462	0.00194083	-0.0127125	-0.00703209
A	GCG	0.00399252	0.0028514	0.00793411	0.00723136	-0.0050714	-0.00401434	-0.00213653	0.027689	-0.000101153	-0.0043338		A	GCG	0.00347722	0.00624339	0.00289679	-0.00219172	-0.00215243	-0.00818681	-0.00429795	0.00382625	-0.00285887	-0.00630522		A	GCG	-0.0041155	0.00489978	0.00255032	0.00359241	0.00285247	-0.00730998	-0.0125907	-0.010563	-0.00856254	0.0197169		A	GCG	0.00777728	0.00221755	0.00579117	0.00405232	-0.000930323	-0.00681692	-0.000621985	-0.00947685	-0.00602563
V	GTC	0.0044548	0.00891865	0.0052925	0.00634439	-0.000669441	-0.00582017	-0.00467438	0.0672332	-0.00241783	-0.00396148		V	GTC	0.0062016	0.0121034	0.0155196	0.0158137	0.00186928	-0.00365554	0.000743181	0.0026839	0.0959303	0.00945547		V	GTC	-0.00623994	0.00344827	0.0108661	0.00556288	-0.00416106	-0.00214578	-0.0143922	-0.0036753	-0.00972902	0.0208669		V	GTC	0.000850232	-0.00587137	-0.0016626	0.00144025	-0.00590853	-0.0015439	-0.00163783	-0.0107414	-0.00496532
V	GTT	0.0210566	0.0179177	-0.000456333	0.0193473	-0.0124058	-0.00498132	0.0088869	0.0731022	-0.000532752	-0.00506889		V	GTT	0.0109889	0.0204263	0.0149246	0.0156371	0.00718978	-0.00199196	0.0018592	-0.00925365	0.100385	0.00221964		V	GTT	-0.00544485	-0.00500539	0.0163046	-0.000314916	0.00598109	0.00228533	-0.00677825	-0.00361226	-0.00384086	0.0114894		V	GTT	-0.00113045	-0.0143064	0.00647602	0.000160739	0.00142443	-0.00470077	0.00379071	-0.00619671	-0.00785543
V	GTA	0.0217925	0.0142077	0.0141486	0.0174735	0.00433947	-0.00530497	0.007289	0.0690771	-0.00242801	0.000733285		V	GTA	0.0144235	0.0303148	0.0142299	0.0193908	0.00391661	0.000607246	0.00397144	0.00618058	0.0875976	0.0279223		V	GTA	-0.0189655	0.00278411	-0.0070585	0.0131437	0.00266603	0.00429065	-0.00768079	-0.00491646	-0.00968228	0.0073713		V	GTA	-0.0167327	-0.0102617	-0.0122518	-0.00619596	-0.00739527	-0.00819081	-0.00294647	-0.00981871	-0.00222224
V	GTG	0.0117304	0.00982722	0.0191347	0.00230134	-0.00210595	-0.000115405	-0.0134214	0.0695698	0.0021879	-0.00341205		V	GTG	0.0135284	0.0114952	0.00984128	0.0113286	-0.00232428	-0.000855794	0.00273416	0.00795086	0.0903987	0.00892124		V	GTG	-0.00947915	0.00792915	0.00892981	0.000843456	0.00782351	-0.000569717	-0.001274	-0.00181049	-0.00879452	0.0240344		V	GTG	-0.0162054	-0.003712	-0.000865116	-0.000792443	-0.00518328	0.0071534	0.00196783	-0.00976647	-0.00363393
D	GAC	0.00122711	-0.00171824	0.0102231	-0.00947112	-0.00623586	-0.00731803	-0.00057254	0.0493129	-0.000699784	0.000947452		D	GAC	0.00129803	0.00508549	-0.00115698	0.0111193	0.00662201	-0.00107085	0.00203863	0.000213538	0.00660019	-0.00617446		D	GAC	0.00459511	0.00391533	0.0147649	0.0055929	0.0110246	0.00582514	0.0014342	-0.0102499	0.000625879	0.0344529		D	GAC	0.0170335	0.00088281	0.00855996	0.0187959	0.00760488	0.013371	-0.000121032	-0.000984505	-0.00647843
D	GAT	0.0038802	0.000779762	0.00563077	-0.00374585	-0.0030456	-0.0110866	0.00319568	0.0313696	0.00947718	-0.00624948		D	GAT	0.00856061	0.0151037	0.0201756	0.0099714	0.006578	-0.00182932	0.00234053	0.0106064	0.00339046	-0.000150227		D	GAT	-0.00715215	0.00734349	0.0051487	0.00140606	0.010737	-0.00436302	-0.00666318	0.00301064	0.0082891	0.0535108		D	GAT	0.0102022	-0.00118815	0.0188314	0.0355681	0.0318284	0.0256601	-0.00374866	-0.000790589	0.00108524
E	GAA	0.0157894	0.00163008	0.00175244	0.00661552	-0.000759652	-0.00556663	-0.00847881	0.0245111	0.00268871	-0.00385549		E	GAA	0.00416246	0.030625	0.00977829	0.0178047	-0.00440209	-0.00633753	-0.00381938	0.0144892	0.0153822	-0.000326158		E	GAA	-0.0124732	0.00306745	0.0025508	0.0089109	0.0123183	0.00721596	-0.00569125	-0.00698255	-0.00614516	0.0224376		E	GAA	0.0109502	-0.00753847	0.0308952	0.0376561	0.0320274	0.029099	0.0418008	-0.0021937	0.0121729
E	GAG	0.00158765	0.00195695	0.0028509	-0.000236545	-0.013104	-0.0102572	-0.00536723	0.0296392	0.000784273	-0.00546096		E	GAG	0.0104843	0.0156092	0.00890628	0.015697	0.0143258	-0.00460436	-0.00184502	0.00250618	0.00578267	-0.00173333		E	GAG	-0.0106182	0.000185246	0.0035673	-0.00172104	0.00867599	0.0077659	-0.010061	-0.00879264	0.00235068	0.0163234		E	GAG	0.0340664	0.0126826	0.0328943	0.0340488	0.0239807	0.031484	0.0233078	0.0129558	-0.00170467
G	GGC	0.00556009	0.000134784	0.00832955	0.00125703	-0.0102361	-0.00444348	-0.00847115	0.0146053	-0.00210647	-0.00447851		G	GGC	0.00455065	0.0121567	0.00774669	0.00628409	-0.00121515	-0.00611279	-0.00464875	-0.000138593	2.81791e-06	-0.0014595		G	GGC	-0.00694345	0.0133264	0.00779688	0.00187589	0.00387439	-0.00103075	-0.00920726	-0.00185511	0.0033678	0.0301043		G	GGC	0.00227614	-0.00463344	0.000788206	0.00529682	-0.000611009	-0.000596527	-0.00182767	-0.00765043	-0.00523206
G	GGT	0.00293718	0.00182926	0.00325144	-0.0100245	-0.0053832	-0.00690461	-0.00368141	0.0142167	-0.00187108	-0.002752		G	GGT	0.00908024	0.00371271	0.00995376	0.00139503	0.00538872	-0.00702395	-0.00336417	-0.000725672	0.00226957	-0.00281647		G	GGT	-0.00575475	0.000559882	0.0124756	0.0076557	0.0095989	0.00317871	-0.00517973	-0.00517463	0.00126566	0.0326787		G	GGT	-0.003884	-0.00513328	-0.00101232	0.00795502	-0.00241431	-0.00037347	-0.00247984	-0.0100436	-0.0094505
G	GGA	0.00649945	-0.00491718	0.00311414	-0.00350871	-0.012213	-0.00423325	-0.00163884	0.00580233	0.000546096	-0.00433931		G	GGA	0.0057669	0.00635379	0.00762279	0.00648491	0.0073319	-0.0113841	-0.00626915	0.00624615	0.00226817	0.00011676		G	GGA	-0.00830208	-0.00243986	-0.00200433	0.0133588	0.00708487	-0.00155084	-0.00784326	-0.0054964	-0.00407211	0.0374079		G	GGA	-0.00526226	-0.0165508	-0.00353316	-0.00625136	0.00997203	0.00368666	0.000773785	-0.0103997	-0.00903465
G	GGG	0.0136888	0.00685075	0.00963577	0.00865535	-0.00890109	-0.00982853	-0.00723799	0.0137948	0.00101927	-0.00422711		G	GGG	0.00986776	0.00352362	0.00697125	0.00716834	0.00496987	-0.00594328	0.000875579	-0.000249706	0.00485998	0.00420539		G	GGG	-0.0023417	0.0105139	0.0109328	0.0113942	0.00122359	0.00157144	-0.00164806	-0.00517578	0.000382012	0.0352528		G	GGG	0.00602012	-0.00712498	0.00138386	-0.00101492	-0.00638662	-0.00144921	-0.0116758	-0.00377504	-0.00572737
[truncated: 12 more columns]

## Sheet: P-value for codon heatmap
P-value for shuffled datasets exceeding experimental data of stop efficiency at the corresponging triplet in the -2nd position while mRNA codon with specified index number is located in the P-site													P-value for shuffled datasets exceeding experimental data of stop efficiency at the corresponging triplet in the E-site while mRNA codon with specified index number is located in the P-site													P-value for shuffled datasets exceeding experimental data of stop efficiency at the corresponging triplet in the P-site while mRNA codon with specified index number is located in the P-site													P-value for shuffled datasets exceeding experimental data of stop efficiency at the corresponging triplet in the A-site while mRNA codon with specified index number is located in the P-site
-2		Index number of mRNA codon located in the P-site											E		Index number of mRNA codon located in the P-site											P		Index number of mRNA codon located in the P-site											A		Index number of mRNA codon located in the P-site
		4	5	6	7	8	9	10	11	12	13				3	4	5	6	7	8	9	10	11	12				2	3	4	5	6	7	8	9	10	11				1	2	3	4	5	6	7	8	9
P	CCC	1	0.785857	0.98008	0.874502	0.950199	0.439243	0.329681	1	0.912351	0.890438		P	CCC	0.950199	0.974104	1	0.997012	0.678287	0.879482	0.986056	0.99502	0.998008	0.366534		P	CCC	0.136454	0.751992	0.843625	0.655378	0.591633	0.517928	0.0697211	0.0408367	0	0.00896414		P	CCC	0.00697211	0.0109562	0.0886454	0.713147	0	0.0836653	0.537849	0.243028	0
P	CCT	0.258964	0.959163	0.131474	0.590637	0.426295	0.38745	0.418327	0.957171	0.88745	0.957171		P	CCT	0.7251	0.950199	0.890438	0.86255	0.854582	0.666335	0.984064	0.938247	0.999004	0.427291		P	CCT	0.865538	0.138446	0.680279	0.474104	0.697211	0.399402	0	0.000996016	0	0.00298805		P	CCT	0.172311	0.0507968	0.059761	0.309761	0.000996016	0.222112	0.0966135	0.151394	0
P	CCA	0.0348606	0.648406	0.179283	0.868526	0.0059761	0.801793	0.906375	0.710159	0.515936	0.219124		P	CCA	0.268924	0.894422	0.957171	0.873506	0.955179	0.676295	0.965139	0.984064	0.99502	0.0368526		P	CCA	0.620518	0.885458	0.707171	0.394422	0.063745	0.576693	0.974104	0.298805	0.0139442	0.51494		P	CCA	0.676295	0.836653	0.0239044	0.128486	0.00996016	0.00199203	0.205179	0	0.00298805
P	CCG	0.120518	0.757968	0.99502	0.567729	0.213147	0.563745	0.721116	0.997012	0.982072	0.973108		P	CCG	0.832669	0.99502	0.808765	0.786853	0.925299	0.991036	0.99004	0.582669	0.999004	0.827689		P	CCG	0.14243	0.928287	0.221116	0.830677	0.47012	0.437251	0.0328685	0.00199203	0.0278884	0.0268924		P	CCG	0.0667331	0.391434	0.721116	0.118526	0.789841	0.994024	0.207171	0.156375	0
L	CTC	0.983068	0.996016	0.644422	0.578685	0.656375	0.822709	0.955179	0.685259	0.962151	0.898406		L	CTC	0.931275	0.856574	0.251992	0.139442	0.818725	0.932271	0.962151	0.842629	0	0.550797		L	CTC	0.346614	0.0229084	0.154382	0.554781	0.293825	0.14243	0.00697211	0.0278884	0.429283	0		L	CTC	0.569721	0.49502	0.997012	1	0.956175	0.994024	0.312749	0.988048	0.959163
L	CTT	0.141434	0.589641	0.997012	0.966135	0.657371	0.739044	0.580677	0.2251	0.885458	0.748008		L	CTT	0.189243	0.23008	0.281873	0.266932	0.272908	0.977092	0.772908	0.620518	0	0.939243		L	CTT	0.568725	0.747012	0.400398	0.448207	0.435259	0.639442	0.696215	0.061753	0.870518	0		L	CTT	0.984064	0.909363	0.999004	0.982072	0.540837	0.99502	0.933267	0.721116	0.986056
L	CTA	0.838645	0.981076	0.812749	0.558765	0.48506	0.655378	0.806773	0.0657371	0.419323	0.492032		L	CTA	0.393426	0.476096	0.303785	0.221116	0.00498008	0.223108	0.11753	0.146414	0	0.763944		L	CTA	0.912351	0.136454	0.763944	0.138446	0.569721	0.325697	0.792829	0.950199	0.300797	0.242032		L	CTA	1	1	0.549801	0.248008	1	0.583665	0.994024	1	0.993028
L	CTG	0.984064	0.153386	0.789841	0.295817	0.0378486	0.570717	0.203187	0.00498008	0.413347	0.957171		L	CTG	0.926295	0.121514	0.723108	0.0816733	0.331673	0.770916	0.988048	0.444223	0	0.766932		L	CTG	0.286853	0.208167	0.000996016	0.0059761	0.064741	0.605578	0.341633	0.312749	0.933267	0		L	CTG	0.919323	0.721116	0.971116	0.973108	0.881474	0.498008	0.999004	0.804781	0.853586
H	CAC	0.0298805	0.662351	0.314741	0.167331	0.222112	0.0119522	0.136454	0	0.0109562	0.237052		H	CAC	0.433267	0.322709	0.0577689	0.307769	0.000996016	0.74502	0.35259	0.673307	1	0.823705		H	CAC	0.00298805	0	0.000996016	0	0	0.0567729	0.207171	0.0249004	0.00298805	0		H	CAC	0.939243	0.820717	0.997012	0.99502	0.957171	0.993028	0.888446	0.60757	0.998008
H	CAT	0.00498008	0.14741	0.914343	0.211155	0.358566	0.00199203	0.595618	0.0059761	0.481076	0.570717		H	CAT	0.620518	0.0896414	0.0328685	0.596614	0.291833	0.507968	0.185259	0.312749	0.986056	0.640438		H	CAT	0.242032	0	0.00796813	0.0229084	0.0268924	0.638446	0.701195	0.412351	0.0159363	0		H	CAT	1	0.99502	0.984064	0.886454	0.915339	0.993028	0.628486	0.752988	0.960159
Q	CAA	0.858566	0.000996016	0.410359	0.238048	0.0468127	0.0149402	0.955179	0.0239044	0.196215	0.993028		Q	CAA	0.956175	0.771912	0.209163	0.930279	0.669323	0.840637	0.439243	0.270916	0.979084	0.974104		Q	CAA	0.170319	0.611554	0.207171	0.24502	0.199203	0.695219	0.640438	0.701195	0.73506	0.920319		Q	CAA	0.988048	0.933267	0.861554	0.650398	0.666335	0.935259	0.701195	0.252988	0.716135
Q	CAG	0.634462	0	0	0.000996016	0.0727092	0.0966135	0.396414	0	0.00199203	0.658367		Q	CAG	0.255976	0.958167	0.816733	0.928287	0.386454	0.966135	0.263944	0.442231	1	0.886454		Q	CAG	0.442231	0.961155	0.419323	0.059761	0.696215	0.731076	0.62251	0.978088	0.443227	0.721116		Q	CAG	0.98506	0.653386	0.988048	0.954183	0.977092	0.497012	0.36753	0.839641	0.408367
R	CGC	0.439243	0.60259	0.733068	0.951195	0.974104	0.0249004	0.0876494	0.00996016	0.989044	0.276892		R	CGC	0.737052	0.136454	0.290837	0.98008	0.671315	0.393426	0.439243	0.938247	0	0.0199203		R	CGC	0.202191	0.889442	0.858566	0.938247	0.247012	0.423307	0.993028	0.999004	0.999004	0.681275		R	CGC	0.25996	0.216135	0.12251	0.935259	0.712151	0.835657	0.935259	0.390438	0.552789
R	CGT	0.968127	0.711155	0.728088	0.256972	0.971116	0.260956	0.126494	0.00199203	0.873506	0.654382		R	CGT	0.238048	0.398406	0.461155	0.998008	0.859562	0.363546	0.827689	0.628486	0	0.00199203		R	CGT	0.758964	0.999004	0.858566	0.663347	0.959163	0.148406	0.932271	0.842629	0.973108	0.996016		R	CGT	0.0468127	1	0.738048	0.679283	0.345618	0.792829	0.241036	0.239044	0.831673
R	CGA	0.805777	0.799801	0.961155	0.257968	0.959163	0.00498008	0.119522	0.383466	0.249004	0.0179283		R	CGA	0.14243	0.952191	0.719124	0.837649	0.954183	0.299801	0.426295	0.864542	0	0.358566		R	CGA	0.444223	0.192231	0.320717	0.756972	0.878486	0.276892	0.962151	0.134462	0.976096	0.00796813		R	CGA	0.683267	0.585657	0	0	0	0	0	0	0
R	CGG	0.0149402	0.153386	0.433267	0.737052	0.062749	0.0059761	0.0149402	0.905378	0.344622	0.894422		R	CGG	0.187251	0.321713	0.76494	0.353586	0.165339	0.0308765	0.453187	0.062749	0	0		R	CGG	0.0149402	0.781873	1	0.487052	0.967131	0.855578	0.767928	0.614542	0.999004	0.9751		R	CGG	0.0388446	0.263944	0	0.13745	0.429283	0.419323	0.621514	0.0308765	0.785857
S	TCC	0.993028	0.880478	0.724104	0.568725	0.817729	0.845618	0.360558	1	0.0378486	0.709163		S	TCC	0.822709	0.351594	0.940239	0.792829	0.324701	0.539841	0.835657	0.904382	1	0.826693		S	TCC	0.126494	0.653386	0.898406	0.817729	0.465139	0.144422	0.228088	0.947211	0.348606	0.86255		S	TCC	0.36753	0.164343	0.822709	0.997012	0.99004	0.934263	0.0896414	0.950199	0.856574
S	TCT	0.801793	0.973108	0.494024	0.348606	0.0916335	0.780876	0.49004	0.895418	0.708167	0.288845		S	TCT	0.486056	0.761952	0.931275	0.0956175	0.841633	0.573705	0.212151	0.76992	1	0.816733		S	TCT	0.0896414	0.816733	0.167331	0.592629	0.49004	0.433267	0.688247	0.217131	0.671315	0.23506		S	TCT	0.904382	0.609562	0.984064	0.914343	0.942231	0.668327	0.288845	0.946215	0.955179
S	TCA	0.993028	0.321713	0.36753	0.61753	0.412351	0.358566	0.196215	0.704183	0.00796813	0.00498008		S	TCA	0.973108	0.00796813	0.616534	0.889442	0.542829	0.60757	0.929283	0.0966135	1	0.956175		S	TCA	0.983068	0.976096	0.996016	0.687251	0.246016	0.263944	0.885458	0.929283	0.159363	0.929283		S	TCA	0.704183	0.941235	0.969124	0.629482	0.962151	0.284861	0.655378	0.972112	0.946215
S	TCG	0.190239	0.312749	0.0219124	0.837649	1	0.173307	0.348606	0.908367	0.128486	0.496016		S	TCG	0.795817	0.73008	0.971116	0.7251	0.940239	0.841633	0.157371	0.961155	1	0.982072		S	TCG	0.179283	0.419323	0.989044	0.841633	0.738048	0.601594	0.162351	0.776892	0.105578	0.320717		S	TCG	0	0.0468127	0.99004	0.145418	0.838645	0.702191	0.489044	0.998008	0.85259
F	TTC	0	0.991036	0.946215	0.999004	0.244024	0.782869	0.705179	0.12749	0.420319	0.268924		F	TTC	0	0.242032	0.0498008	0.0707171	0.314741	0.205179	0.0328685	0.399402	0.538845	0.807769		F	TTC	0.0278884	0	0.00398406	0.00498008	0.109562	0.0139442	0.0189243	0.562749	0.876494	0		F	TTC	0.639442	0.885458	1	0.997012	0.760956	0.967131	0.793825	0.786853	0.898406
F	TTT	0	0.399402	0.416335	0.813745	0.691235	0.896414	0.515936	0.14243	0.324701	0.214143		F	TTT	0	0.00199203	0.0169323	0.12251	0.000996016	0.0976096	0.179283	0.658367	0.157371	0.739044		F	TTT	0	0.0109562	0.108566	0.205179	0.290837	0.0747012	0.213147	0.0139442	0.805777	0.00199203		F	TTT	0.554781	0.890438	0.99004	0.908367	0.978088	0.568725	0.88247	0.697211	0.996016
L	TTA	1	0.497012	0.5249	0.49502	0.946215	0.658367	0.350598	0.331673	0.61255	0.962151		L	TTA	0	0.0139442	0.73008	0.420319	0.0866534	0.49502	0.98506	0.476096	0.000996016	0.0249004		L	TTA	0.756972	0.23506	0.420319	0.00498008	0.0328685	0.184263	0.0338645	0.832669	0.697211	0.0278884		L	TTA	0.988048	0.828685	0.925299	0.994024	0.99004	0.578685	0.669323	0.903386	0.89243
L	TTG	0	0.345618	0.598606	0.204183	0.256972	0.303785	0.210159	0.876494	0.580677	0.747012		L	TTG	0	0.0547809	0.540837	0.944223	0.433267	0.335657	0.722112	0.820717	0.00498008	0.000996016		L	TTG	1	0.0149402	0.130478	0.0976096	0.242032	0.378486	0.287849	0.680279	0.126494	0.00199203		L	TTG	0.711155	0.236056	0.913347	0.997012	0.577689	0.461155	0.737052	0.336653	0.497012
Y	TAC	0.292829	0.738048	0.909363	0.671315	0.218127	0.954183	0.499004	0.171315	0.660359	0.794821		Y	TAC	0.50498	0.241036	0.106574	0.26992	0.0268924	0.393426	0.544821	0.386454	0.0567729	0.864542		Y	TAC	0.0826693	0	0	0.0458167	0.100598	0.0298805	0.00796813	0.771912	0	0		Y	TAC	0.983068	0.809761	0.979084	0.963147	0.934263	0.673307	0.987052	1	0.981076
Y	TAT	0.454183	0.988048	0.537849	0.253984	0.489044	0.538845	0.584661	0.176295	0.460159	0.172311		Y	TAT	0.547809	0.00996016	0.0747012	0.10757	0.981076	0.0816733	0.540837	0.36255	0.368526	0.381474		Y	TAT	0.301793	0	0.0109562	0.059761	0.00796813	0.677291	0.569721	0.060757	0	0.0109562		Y	TAT	1	0.953187	0.982072	0.766932	0.954183	0.338645	0.317729	0.992032	0.634462
*	TAA	0.865538	0.733068	0.640438	0.588645	0.155378	0.234064	0.386454	0.999004	0.523904	0.14243		*	TAA	0.817729	0.906375	0.680279	0.689243	0.577689	0.164343	0.283865	0.391434	0.99502	0.499004		*	TAA	0.221116	0.84761	0.800797	0.723108	0.669323	0.521912	0.190239	0.26494	0.405378	0.99502		*	TAA	0.179283	0.564741	0	0	0.783865	0	0.0657371	0.616534	0.489044
*	TAG	0.850598	0.768924	0.737052	0.549801	0.0906375	0.182271	0.354582	0.999004	0.530876	0.0498008		*	TAG	0.824701	0.914343	0.739044	0.695219	0.550797	0.13247	0.185259	0.36255	1	0.50996		*	TAG	0.227092	0.86255	0.894422	0.705179	0.718127	0.553785	0.124502	0.183267	0.361554	1		*	TAG	0.960159	0.0308765	0	0	0	0.00398406	0.227092	0.00298805	0.00498008
C	TGC	0.173307	0.40239	0.0298805	0.991036	0.144422	0.929283	0.680279	0.609562	0.660359	0.288845		C	TGC	0.341633	0.115538	0.418327	0.435259	0.339641	0.267928	0.818725	0.976096	1	0.983068		C	TGC	0.693227	0.991036	0.522908	0.860558	0.580677	0.86255	0.600598	0.346614	0.778884	0.991036		C	TGC	0.664343	0.809761	0.989044	0.876494	0.998008	0.933267	0.399402	0.979084	0.99502
C	TGT	0	0.11255	0.275896	0.283865	0.933267	0.425299	0.856574	0.540837	0.280876	0.896414		C	TGT	0.605578	0.763944	0.868526	0.920319	0.471116	0.234064	0.736056	0.956175	0.99502	0.49004		C	TGT	0.831673	0.791833	0.776892	0.945219	0.499004	0.278884	0.989044	0.694223	0.920319	1		C	TGT	0.267928	0.239044	0.991036	0.951195	0.467131	0.63745	0.823705	0.805777	0.750996
*	TGA	0.924303	0.723108	0.716135	0.52988	0.101594	0.163347	0.379482	1	0.511952	0.0876494		*	TGA	0.884462	0.866534	0.700199	0.734064	0.595618	0.105578	0.191235	0.369522	1	0.507968		*	TGA	0.159363	0.815737	0.849602	0.773904	0.703187	0.579681	0.114542	0.193227	0.368526	1		*	TGA	0.233068	0.060757	0	0	0	0.0169323	0.00199203	0.0348606	0.210159
W	TGG	0.0268924	0.85757	0.7251	0.865538	0.74004	0.243028	0.497012	0.911355	0.866534	0.886454		W	TGG	0.670319	0.657371	0.239044	0.281873	0.247012	0.265936	0.0059761	0.0378486	1	0.615538		W	TGG	0.953187	0.0348606	0.255976	0.808765	0.23008	0.165339	0.454183	0.000996016	0.807769	0		W	TGG	0.000996016	0.0059761	0	0.0149402	0.364542	0.0219124	0.228088	0.000996016	0.658367
T	ACC	0.150398	0.0527888	0.536853	0.808765	0.141434	0.306773	0.761952	0.000996016	0.0378486	0.247012		T	ACC	0.667331	0.994024	0.344622	0.649402	0.889442	0.126494	0.817729	0.948207	0.893426	0.988048		T	ACC	0.442231	0.478088	0.833665	0.967131	0.895418	0.063745	0.88247	0.513944	0.883466	0.993028		T	ACC	0.161355	0.320717	0.992032	0.943227	0.880478	0.776892	0.300797	0.944223	0.930279
T	ACT	0.972112	0.11753	0.444223	0.752988	0.0876494	0.464143	0.630478	0	0.125498	0.310757		T	ACT	0.948207	0.993028	0.0179283	0.383466	0.934263	0.894422	0.85757	0.671315	0.89243	0.809761		T	ACT	0.999004	0.936255	0.783865	0.88247	0.832669	0.923307	0.988048	0.699203	0.828685	0.569721		T	ACT	0.836653	0.968127	0.613546	0.696215	0.685259	0.803785	0.878486	0.823705	0.753984
T	ACA	0.303785	0.268924	0.289841	0.630478	0.0258964	0.417331	0.36255	0	0.000996016	0.205179		T	ACA	0.659363	0.893426	0.792829	0.865538	0.737052	0.50996	0.991036	0.355578	0.677291	0.888446		T	ACA	0.881474	0.676295	0.749004	0.332669	0.76992	0.697211	0.783865	0.404382	0.396414	0.986056		T	ACA	0.568725	0.129482	0.611554	0.356574	0.508964	0.664343	0.993028	0.939243	0.737052
T	ACG	0.0816733	0.500996	0.0219124	0.105578	0.229084	0.467131	0.195219	0.0737052	0.059761	0.113546		T	ACG	0.39243	0.416335	0.802789	0.679283	0.61753	0.268924	0.895418	0.923307	0.889442	0.359562		T	ACG	0.193227	0.650398	0.786853	0.668327	0.906375	0.467131	0.552789	0.987052	0.984064	0.971116		T	ACG	0.109562	0.312749	0.831673	0.105578	0.600598	0.674303	0.101594	0.687251	0.976096
I	ATC	0.781873	0.496016	0.186255	0.370518	0.120518	0.914343	0.420319	0.000996016	0.468127	0.88247		I	ATC	0.592629	0.286853	0.110558	0.0408367	0.0587649	0.334661	0.0816733	0.380478	0	0.24004		I	ATC	0.542829	0.140438	0.24004	0.550797	0.277888	0.371514	0.783865	0.554781	0.919323	0.621514		I	ATC	0.777888	0.35259	0.868526	0.942231	0.664343	0.758964	0.968127	0.412351	0.684263
I	ATT	0.77988	0.52988	0.623506	0.0268924	0.00796813	0.545817	0.0816733	0.062749	0.810757	0.101594		I	ATT	0.190239	0.194223	0.629482	0.454183	0.10757	0.162351	0.353586	0.0109562	0	0.483068		I	ATT	0.950199	0.979084	0.7749	0.967131	0.466135	0.756972	0.293825	0.342629	0.773904	0.968127		I	ATT	0.987052	0.958167	0.929283	0.37251	0.699203	0.532869	0.726096	0.785857	0.530876
I	ATA	0.298805	0.515936	0.889442	0.868526	0.0249004	0.542829	0.478088	0.0109562	0.237052	0.763944		I	ATA	0.0717131	0.0109562	0.936255	0.618526	0.194223	0.190239	0.120518	0.0418327	0	0.61255		I	ATA	0.875498	0.400398	0.0816733	0.448207	0.153386	0.861554	0.0328685	0.926295	0.0866534	0.0378486		I	ATA	1	0.993028	0.309761	0.0149402	0.170319	0.0547809	0.291833	0.726096	0.116534
M	ATG	0.369522	0.408367	0.76494	0.290837	0.721116	0.600598	0.963147	0.578685	0.281873	0.994024		M	ATG	0.555777	0.242032	0.63247	0.312749	0.656375	0.221116	0.718127	0.629482	0.729084	0.728088		M	ATG	0.135458	0.630478	0.0258964	0.816733	0.000996016	0.931275	0.297809	0.309761	0.280876	0.0328685		M	ATG	0.670319	0.994024	0.99502	0.763944	0.884462	0.174303	0.394422	0.851594	0.743028
N	AAC	0.331673	0.000996016	0.706175	0.158367	0.824701	0.620518	0.34761	0.173307	0.318725	0.423307		N	AAC	0.156375	0.737052	0.242032	0.266932	0.723108	0.157371	0.437251	0.185259	0.201195	0.37251		N	AAC	0.649402	0.232072	0.0557769	0.0478088	0.539841	0.13247	0.193227	0.349602	0.787849	0.0976096		N	AAC	0.575697	0.915339	0.706175	0.778884	0.061753	0.270916	0.329681	0.330677	0.608566
N	AAT	0.571713	0.908367	0.447211	0.539841	0.605578	0.778884	0.285857	0.190239	0.840637	0.981076		N	AAT	0.604582	0.610558	0.456175	0.90239	0.511952	0.24004	0.252988	0.120518	0.241036	0.776892		N	AAT	0.2749	0.88745	0.328685	0.285857	0.437251	0.874502	0.0786853	0.255976	0.267928	0.413347		N	AAT	0.814741	0.733068	0.062749	0.0418327	0.878486	0.0587649	0.180279	0.552789	0.705179
K	AAA	0.00298805	0.129482	0.704183	0.424303	0.164343	0.439243	0.267928	0.0527888	0.0209163	0.538845		K	AAA	0.285857	0.440239	0.252988	0.123506	0.950199	0.738048	0.175299	0.297809	0	0.146414		K	AAA	0.994024	0.675299	0.874502	0.471116	0.668327	0.0846614	0.275896	0.948207	0.645418	0.189243		K	AAA	0.565737	0.469124	0.00996016	0	0	0.00697211	0.207171	0.00298805	0.0547809
K	AAG	0.227092	0.200199	0.691235	0.276892	0.36255	0.889442	0.360558	0.0249004	0.561753	0.89741		K	AAG	0.682271	0.215139	0.788845	0.429283	0.76992	0.298805	0.916335	0.293825	0	0.747012		K	AAG	0.960159	0.927291	0.822709	0.870518	0.461155	0.0547809	0.804781	0.258964	0.365538	0.993028		K	AAG	0.125498	0.217131	0	0	0	0	0.0557769	0	0
S	AGC	0.751992	0.400398	0.379482	0.25498	0.123506	0.960159	0.899402	0.920319	0.197211	0.301793		S	AGC	0.736056	0.569721	0.969124	0.346614	0.665339	0.832669	0.179283	0.0786853	1	0.569721		S	AGC	0.537849	0.345618	0.26992	0.639442	0.353586	0.713147	0.459163	0.795817	0.429283	0.380478		S	AGC	0.893426	0.945219	0.825697	0.859562	0.820717	0.88745	0.951195	0.395418	0.841633
S	AGT	0.773904	0.721116	0.645418	0.291833	0.143426	0.599602	0.737052	0.863546	0.498008	0.826693		S	AGT	0.910359	0.834661	0.726096	0.39243	0.312749	0.661355	0.130478	0.559761	1	0.203187		S	AGT	0.60757	0.415339	0.724104	0.998008	0.669323	0.750996	0.536853	0.9751	0.2749	0.805777		S	AGT	0	0.530876	0.35757	0	0.0129482	0.12749	0.563745	0.549801	0.195219
R	AGA	0.383466	0.0796813	0.988048	0.25498	0.636454	0.0268924	0.00498008	0.219124	0.695219	0.790837		R	AGA	0.000996016	0.59761	0.781873	0.722112	0.449203	0.162351	0.496016	0.0826693	0	0.000996016		R	AGA	1	0.848606	0.927291	0.886454	0.484064	0.75498	0.760956	0.47012	0.974104	0.992032		R	AGA	0.793825	0.135458	0	0	0	0	0.0149402	0.0577689	0.476096
R	AGG	0.151394	0.584661	0.349602	0.687251	0.868526	0.106574	0.474104	0.334661	0.785857	0.285857		R	AGG	0.286853	0.635458	0.48008	0.103586	0.760956	0.168327	0.0677291	0.782869	0	0		R	AGG	0.197211	0.98506	0.889442	0.692231	0.890438	0.880478	0.0956175	0.837649	0.906375	0.954183		R	AGG	0.868526	0.483068	0	0.00199203	0.0139442	0.0846614	0	0	0
A	GCC	0.991036	0.894422	0.430279	0.708167	0.989044	0.996016	0.917331	1	0.790837	0.889442		A	GCC	0.825697	0.958167	0.891434	0.737052	0.665339	0.854582	0.326693	0.956175	1	1		A	GCC	0.155378	0.758964	0.210159	0.9751	0.998008	0.901394	0.842629	0.825697	0.909363	1		A	GCC	0.00199203	0	1	0.983068	0.976096	0.90239	0.920319	0.946215	0.905378
A	GCT	0.403386	0.064741	0.957171	0.131474	0.965139	0.978088	0.582669	0.893426	0.869522	0.623506		A	GCT	0.430279	0.644422	0.700199	0.828685	0.458167	0.858566	0.229084	0.834661	1	0.993028		A	GCT	0.925299	0.538845	0.550797	0.551793	0.99502	0.731076	0.34761	0.584661	0.791833	0.999004		A	GCT	0.128486	0.261952	0.563745	0.924303	0.335657	0.753984	0.499004	0.673307	0.934263
A	GCA	0.478088	0.0896414	0.360558	0.228088	0.558765	0.351594	0.00996016	0.986056	0.293825	0.287849		A	GCA	0.676295	0.25996	0.182271	0.204183	0.0358566	0.349602	0.577689	0.00697211	1	0.987052		A	GCA	0.796813	0.89243	0.768924	0.38247	0.741036	0.992032	0.85757	0.936255	0.565737	1		A	GCA	0.22012	0.954183	0.966135	0.603586	0.895418	0.700199	0.436255	0.965139	0.795817
A	GCG	0.890438	0.682271	0.150398	0.0527888	0.331673	0.471116	0.469124	0.968127	0.544821	0.170319		A	GCG	0.794821	0.708167	0.645418	0.954183	0.770916	0.75996	0.49502	0.00996016	1	0.986056		A	GCG	0.305777	0.616534	0.937251	0.583665	0.64741	0.969124	0.994024	0.999004	0.991036	1		A	GCG	0.0557769	0.0139442	0.507968	0.885458	0.934263	0.999004	0.664343	0.913347	0.734064
V	GTC	0.786853	0.143426	0.376494	0.138446	0.0378486	0.703187	0.770916	0	0.803785	0.140438		V	GTC	0.512948	0.218127	0.00199203	0.00398406	0.463147	0.184263	0.0428287	0.0587649	0	0		V	GTC	0.512948	0.734064	0.24502	0.390438	0.960159	0.724104	0.994024	0.395418	0.986056	0.999004		V	GTC	0.521912	0.526892	0.979084	0.945219	0.98008	0.870518	0.687251	0.928287	0.579681
V	GTT	0.0129482	0.00398406	0.750996	0.00199203	0.881474	0.549801	0.0219124	0	0.546813	0.329681		V	GTT	0.140438	0.00996016	0.0468127	0.0328685	0.229084	0.193227	0.0667331	0.924303	0	0.309761		V	GTT	0.464143	0.994024	0.121514	0.757968	0.415339	0.446215	0.515936	0.409363	0.644422	1		V	GTT	0.656375	0.930279	0.442231	0.904382	0.655378	0.891434	0.361554	0.487052	0.775896
V	GTA	0.0278884	0.0547809	0.110558	0.00796813	0.0119522	0.576693	0.0358566	0	0.671315	0.0418327		V	GTA	0.062749	0.00199203	0.110558	0.0109562	0.38745	0.0747012	0.0428287	0.0717131	0	0		V	GTA	0.969124	0.674303	0.967131	0.0816733	0.598606	0.355578	0.609562	0.538845	0.900398	1		V	GTA	0.994024	0.736056	0.993028	0.98008	0.939243	0.946215	0.682271	0.753984	0.335657
V	GTG	0.268924	0.0667331	0	0.386454	0.141434	0.0966135	0.993028	0	0.299801	0.139442		V	GTG	0.0577689	0.243028	0.101594	0.0557769	0.722112	0.0697211	0.0328685	0.00398406	0	0.00996016		V	GTG	0.736056	0.287849	0.474104	0.767928	0.287849	0.613546	0.0796813	0.221116	0.939243	0.9751		V	GTG	0.999004	0.300797	0.944223	0.966135	0.972112	0.303785	0.459163	0.836653	0.388446
D	GAC	0.895418	0.873506	0.0826693	0.973108	0.518924	0.832669	0.313745	0.00697211	0.596614	0		D	GAC	0.812749	0.702191	0.87749	0.0697211	0.170319	0.0547809	0.0129482	0.272908	1	0.953187		D	GAC	0.0527888	0.683267	0.0826693	0.436255	0.103586	0.191235	0.00298805	0.953187	0.241036	0.65239		D	GAC	0.0059761	0.114542	0.256972	0.0268924	0.268924	0.0488048	0.599602	0.064741	0.7251
D	GAT	0.76992	0.784861	0.396414	0.736056	0.291833	0.948207	0.173307	0.668327	0.0358566	0.503984		D	GAT	0.293825	0.063745	0.00996016	0.224104	0.267928	0.177291	0.0697211	0.00796813	1	0.5		D	GAT	0.59761	0.373506	0.653386	0.672311	0.204183	0.742032	0.513944	0.0577689	0.0448207	0.0229084		D	GAT	0.0727092	0.183267	0.0199203	0	0	0.00298805	0.737052	0.140438	0.109562
E	GAA	0.167331	0.682271	0.613546	0.202191	0.156375	0.62749	0.881474	0.884462	0.353586	0.285857		E	GAA	0.595618	0	0.242032	0.0119522	0.747012	0.520916	0.451195	0.00498008	0.983068	0.525896		E	GAA	0.828685	0.697211	0.76494	0.203187	0.144422	0.213147	0.452191	0.710159	0.728088	0.919323		E	GAA	0.109562	0.581673	0	0	0	0	0	0.218127	0.00199203
E	GAG	0.842629	0.671315	0.567729	0.593625	0.969124	0.957171	0.743028	0.746016	0.471116	0.414343		E	GAG	0.212151	0.0677291	0.187251	0.0249004	0.0199203	0.348606	0.265936	0.150398	1	0.650398		E	GAG	0.749004	0.901394	0.814741	0.863546	0.249004	0.138446	0.815737	0.868526	0.165339	0.999004		E	GAG	0	0	0	0	0.000996016	0	0	0	0.224104
G	GGC	0.807769	0.905378	0.0986056	0.494024	0.954183	0.51992	0.99502	1	0.851594	0.155378		G	GGC	0.660359	0.166335	0.12749	0.265936	0.716135	0.518924	0.537849	0.244024	1	0.744024		G	GGC	0.580677	0.00996016	0.568725	0.776892	0.559761	0.690239	0.911355	0.12251	0.00697211	0.940239		G	GGC	0.39741	0.363546	0.973108	0.813745	0.912351	0.914343	0.749004	0.711155	0.619522
G	GGT	0.923307	0.701195	0.564741	0.986056	0.432271	0.791833	0.634462	1	0.699203	0.0687251		G	GGT	0.180279	0.831673	0.100598	0.711155	0.211155	0.588645	0.38247	0.350598	1	0.810757		G	GGT	0.462151	0.910359	0.204183	0.233068	0.149402	0.34761	0.379482	0.582669	0.218127	0.763944		G	GGT	0.884462	0.396414	0.937251	0.52988	0.918327	0.814741	0.737052	0.875498	0.926295
G	GGA	0.656375	0.972112	0.579681	0.807769	0.9751	0.477092	0.450199	1	0.459163	0.297809		G	GGA	0.516932	0.610558	0.292829	0.299801	0.124502	0.946215	0.7251	0.0258964	1	0.515936		G	GGA	0.661355	0.953187	0.957171	0.0169323	0.304781	0.676295	0.682271	0.599602	0.625498	0.417331		G	GGA	0.879482	0.960159	0.97012	1	0.148406	0.536853	0.502988	0.841633	0.859562
G	GGG	0.0747012	0.175299	0.0747012	0.0199203	0.893426	0.992032	0.935259	1	0.376494	0.150398		G	GGG	0.0956175	0.920319	0.204183	0.186255	0.184263	0.456175	0.0239044	0.246016	1	0.0776892		G	GGG	0.141434	0.0537849	0.226096	0.0189243	0.775896	0.430279	0.0507968	0.59761	0.166335	0.592629		G	GGG	0.0956175	0.59761	0.931275	0.999004	0.998008	0.939243	0.991036	0.148406	0.677291
[truncated: 12 more columns]

## Sheet: Heatmap for codons in sites
Stop efficiency at the corresponging triplet while located in the ribosome sites								P-values for shuffled datasets exceeding experimental data of stop efficiency at the corresponging triplet while located in the ribosome sites
		Ribosome sites								Ribosome sites
		-2	E	P	A	2				-2	E	P	A	2
P	CCC	-0.000464953	0.000173237	0.00597411	0.00468416	0.00111257		P	CCC	1	1	0.00498008	0	0.419323
P	CCT	0.00231652	-0.000420287	0.0079947	0.00668205	0.000210556		P	CCT	0.914343	1	0.000996016	0	0.660359
P	CCA	0.00387254	-5.91618e-05	0.0030108	0.00732544	-0.000393175		P	CCA	0.403386	1	0.465139	0	0.910359
P	CCG	0.00146667	0.000331177	0.00571102	0.00217811	0.00056051		P	CCG	0.999004	1	0.0149402	0.0278884	0.623506
L	CTC	-0.000796079	0.00574696	0.0112736	-0.00545093	0.000467021		L	CTC	1	0.136454	0	1	0.590637
L	CTT	0.00105461	0.00933193	0.00774582	-0.00963004	-0.000748702		L	CTT	0.952191	0.000996016	0.0547809	1	0.766932
L	CTA	0.000962073	0.0111643	0.00427251	-0.0136661	0.000132846		L	CTA	0.880478	0	0.522908	1	0.721116
L	CTG	0.00528606	0.00859394	0.0108768	-0.00562523	0.00133048		L	CTG	0.189243	0.00298805	0	1	0.373506
H	CAC	0.00981152	0.00448734	0.0180715	-0.00656511	0.000871633		H	CAC	0	0.384462	0	1	0.516932
H	CAT	0.00858265	0.00535745	0.0144734	-0.00930199	-0.00224648		H	CAT	0.00398406	0.231076	0	1	0.953187
Q	CAA	0.00676368	-0.000825334	0.00348232	-0.00443146	0.00314891		Q	CAA	0.0109562	0.996016	0.481076	0.997012	0.247012
Q	CAG	0.0135992	-0.000462905	0.00289061	-0.00419119	1.08739e-06		Q	CAG	0	0.998008	0.861554	1	0.693227
R	CGC	0.00349706	0.0117934	0.00160738	0.000145092	0.00330458		R	CGC	0.492032	0	0.998008	0.704183	0.00498008
R	CGT	0.00345175	0.010557	-0.00125032	-0.000718337	0.00507328		R	CGT	0.50498	0	1	0.77988	0.000996016
R	CGA	0.00353812	0.0065664	0.00430203	0.0201855	0.00395526		R	CGA	0.395418	0.0428287	0.376494	0	0.0727092
R	CGG	0.00551338	0.0139014	0.000731459	0.00337	0.00595763		R	CGG	0.0348606	0	1	0.00498008	0
S	TCC	4.12606e-05	-0.00134921	0.00372426	-0.00255161	0.00189556		S	TCC	0.998008	1	0.741036	0.99502	0.13745
S	TCT	0.0017096	0.000609916	0.00531248	-0.00513798	0.00233573		S	TCT	0.891434	0.99502	0.207171	0.999004	0.207171
S	TCA	0.00433663	0.000265331	-0.00182486	-0.00481812	-0.00350994		S	TCA	0.363546	0.986056	0.996016	0.999004	0.994024
S	TCG	0.00370746	-0.00307131	0.0029662	0.000494833	0.000392123		S	TCG	0.510956	1	0.737052	0.569721	0.634462
F	TTC	-0.00127137	0.00760886	0.0176975	-0.00761808	-0.000571834		F	TTC	0.984064	0.0249004	0	1	0.746016
F	TTT	0.00415761	0.0129601	0.0141656	-0.00734077	0.00213693		F	TTT	0.062749	0	0	0.999004	0.375498
L	TTA	-0.00123803	0.0121081	0.00870504	-0.0105166	-0.00296024		L	TTA	0.908367	0	0.00697211	1	0.930279
L	TTG	0.00506554	0.00780974	0.00969942	-0.00237791	0.00271617		L	TTG	0.0567729	0.0139442	0.000996016	0.936255	0.210159
Y	TAC	0.00150842	0.00839057	0.0241758	-0.00914465	-0.00506295		Y	TAC	0.778884	0.0199203	0	1	0.998008
Y	TAT	0.00308725	0.00962311	0.0160782	-0.0114728	-0.00378315		Y	TAT	0.648406	0.0169323	0	1	0.962151
*	TAA	0	0	0	0.0173471	0.00394342		*	TAA	0.894422	0.959163	0.903386	0	0.246016
*	TAG	0	0	0	0.0240736	0.00111748		*	TAG	0.947211	0.98506	0.987052	0	0.448207
C	TGC	0.00298826	0.00118615	0.00078153	-0.00448627	0.000915569		C	TGC	0.567729	0.99004	0.999004	0.999004	0.471116
C	TGT	0.00603574	-2.09635e-05	-0.00326025	-0.00231259	0.00205194		C	TGT	0.0119522	0.996016	0.999004	0.912351	0.314741
*	TGA	0	0	0	0.02491	0.0103547		*	TGA	0.943227	0.976096	0.907371	0	0
W	TGG	0.00128036	0.0040621	0.00736613	0.0105855	0.00268626		W	TGG	0.929283	0.582669	0.00398406	0	0.175299
T	ACC	0.00567563	0.00117904	0.000477425	-0.00226447	-0.00210721		T	ACC	0	0.999004	0.986056	0.992032	0.991036
T	ACT	0.00634005	-0.000477465	-0.00513989	-0.00345023	-0.00249754		T	ACT	0.0348606	0.99004	1	0.986056	0.967131
T	ACA	0.00778945	-0.000296573	-0.0012898	-0.000851975	-0.00303728		T	ACA	0.00398406	0.991036	0.976096	0.85757	0.998008
T	ACG	0.00803338	0.00257781	-0.000362013	0.00157567	0.00172637		T	ACG	0	0.913347	0.991036	0.325697	0.336653
I	ATC	0.00495488	0.0184361	0.00406732	-0.00301371	-0.00418094		I	ATC	0.110558	0	0.430279	0.991036	0.997012
I	ATT	0.00725497	0.0143015	-0.00484719	-0.0061258	-0.00893084		I	ATT	0.064741	0	0.999004	0.998008	1
I	ATA	0.00457272	0.012479	0.00354617	-0.00507824	-0.00389861		I	ATA	0.266932	0	0.234064	0.992032	0.971116
M	ATG	0.00111029	0.00377632	0.00813617	-0.00490824	-0.00233748		M	ATG	0.826693	0.598606	0.0139442	0.998008	0.932271
N	AAC	0.00523903	0.00618536	0.0074204	0.00115642	0.00219703		N	AAC	0.0468127	0.114542	0.00996016	0.593625	0.339641
N	AAT	0.00151232	0.00479675	0.00423519	0.00120489	-0.00231046		N	AAT	0.836653	0.50996	0.368526	0.40239	0.876494
K	AAA	0.00865733	0.0088057	-0.0013458	0.0133828	-0.000118262		K	AAA	0.00199203	0.0139442	0.951195	0	0.813745
K	AAG	0.00501203	0.00684394	-0.000306401	0.027119	0.00163485		K	AAG	0.166335	0.0886454	0.9751	0	0.336653
S	AGC	0.00188414	-0.000384962	0.00416444	-0.00415217	-0.00011511		S	AGC	0.682271	0.996016	0.458167	1	0.786853
S	AGT	0.00124825	0.000930359	-0.00182551	0.010331	-0.00188457		S	AGT	0.853586	0.940239	0.989044	0	0.917331
R	AGA	0.00550357	0.0129436	-0.00651986	0.0209321	0.00103786		R	AGA	0.0926295	0	1	0	0.697211
R	AGG	0.00357652	0.0118766	-0.000870898	0.013523	0.000547845		R	AGG	0.361554	0	0.988048	0	0.672311
A	GCC	-0.000882804	-0.00196725	3.18302e-05	-0.00189048	-0.000259693		A	GCC	1	1	1	1	0.800797
A	GCT	0.00176975	-0.00112958	-0.000610115	-0.000874685	-0.00125152		A	GCT	0.913347	1	1	0.799801	0.934263
A	GCA	0.00484555	0.00379474	-0.00365746	-0.00229639	-0.00210221		A	GCA	0.194223	0.76494	1	0.978088	0.98506
A	GCG	0.00363734	-0.000729535	-0.00126483	-0.000631017	-0.000885628		A	GCG	0.561753	1	1	0.821713	0.917331
V	GTC	0.00783852	0.0164412	0.00100856	-0.00373126	-0.00287273		V	GTC	0	0	0.996016	1	0.993028
V	GTT	0.0131203	0.016109	0.000683366	-0.00390763	-0.00275704		V	GTT	0	0	0.977092	0.981076	0.950199
V	GTA	0.0150482	0.0197273	-0.00175321	-0.00748695	0.000569453		V	GTA	0	0	0.993028	1	0.639442
V	GTG	0.01028	0.0154816	0.00303208	-0.00379959	0.000855393		V	GTG	0	0	0.807769	0.997012	0.488048
D	GAC	0.00308729	0.00248197	0.00762128	0.00522252	0.00274938		D	GAC	0.416335	0.889442	0.0199203	0.00697211	0.119522
D	GAT	0.00254745	0.00845062	0.00620491	0.0114526	0.000454717		D	GAT	0.692231	0.0249004	0.133466	0	0.565737
E	GAA	0.00342861	0.00870926	0.00250258	0.0196412	0.00376918		E	GAA	0.445219	0.00996016	0.663347	0	0.199203
E	GAG	0.000192684	0.00706467	0.00112602	0.0215269	0.00507949		E	GAG	0.965139	0.0747012	0.973108	0	0.0119522
G	GGC	6.97488e-05	0.00171702	0.00447772	-0.00173646	0.00103987		G	GGC	1	1	0.537849	0.993028	0.348606
G	GGT	-0.000621013	0.00239685	0.00458636	-0.00348075	-0.0012138		G	GGT	1	0.929283	0.295817	0.99502	0.916335
G	GGA	-0.00171565	0.00233153	0.00248659	-0.00301349	-0.00096738		G	GGA	0.998008	0.874502	0.733068	0.99502	0.936255
G	GGG	0.00306549	0.00396648	0.00623948	-0.00322842	-0.000496757		G	GGG	0.672311	0.772908	0.0179283	1	0.903386

## Sheet: 2D codon heatmap
2-dimensional representation of stalling propensities with the corresponding codons located in the P- and A-sites
P\A		Codons located in the A-site
		CCC	CCT	CCA	CCG	CTC	CTT	CTA	CTG	CAC	CAT	CAA	CAG	CGC	CGT	CGA	CGG	TCC	TCT	TCA	TCG	TTC	TTT	TTA	TTG	TAC	TAT	TAA	TAG	TGC	TGT	TGA	TGG	ACC	ACT	ACA	ACG	ATC	ATT	ATA	ATG	AAC	AAT	AAA	AAG	AGC	AGT	AGA	AGG
P	CCC	0.0208076	0.0306866	0.0281676	0.0146302	-0.00547202	-0.0213822	-0.0122225	-0.00199083	-0.00241696	-0.00700041	-0.00609163	-0.00369434	-0.000992683	-0.00696722	0.00258004	-0.00313235	-0.00645053	0.00602405	0.00805675	0.00387289	-0.00917803	0.00585542	-0.00824106	-0.0238917	-0.00280083	0.00243259	-0.0352623	0.0019357	-0.00876791	-0.00198709	-0.0447172	0.0070473	0.00215506	-0.000464826	-0.00088763	-0.00188984	0.00804766	-0.00458483	0.00383433	0.00530507	0.0114197	-0.00185759	-0.000157291	0.0137534	-0.000933485	0.0315904	0.0238182	0.0136681
P	CCT	0.0314246	0.0222565	0.0266809	0.0249586	0.00624046	-0.0129113	-0.0386355	-0.00541836	0.00466764	0.00814049	0.0182281	-0.0188729	0.00111102	0.00336089	0.0151671	-0.00636694	-0.00227793	-0.0108939	-0.00171033	-0.007911	-0.0184219	-0.0214259	0.00277649	0.0153328	-0.023124	-0.0129522	0.0837987	-0.01214	-0.00641608	-0.00485122	0.0200099	-0.00755802	0.00556936	-0.00349779	0.0204116	0.0256459	-0.0152756	-0.0108375	0.0279744	0.0158117	0.0112048	-0.00470795	-0.0272253	0.0324201	-0.0203167	-0.0249018	0.0316199	-0.0137879
P	CCA	0.0275581	0.0596875	0.0271157	0.0282113	0.00205563	-0.0135842	-0.0351656	0.00290675	-0.005343	-0.00605123	0.00980672	-0.00602654	-0.00721848	-0.0175551	0.00841094	-0.00941295	-0.0133791	0.0028319	-0.00727671	0.00279577	0.00717803	-0.0108295	-0.0117348	-0.00432484	-0.0197977	-0.0267248	0.00832522	0.0434144	-0.0151841	-0.00480091	0.0160258	0.00572118	-0.0182808	0.00871271	0.000448296	0.00440758	-0.0119179	-0.0278302	0.00238972	0.0103386	0.00245032	-0.0210131	-0.0198975	0.00705727	-0.0073824	-0.0207086	0.00422088	0.00217964
P	CCG	0.0202248	0.0371669	0.0404014	0.0181786	-0.0146149	-0.021207	-0.0271014	-0.00148448	-0.0193924	-0.0063955	0.00732687	-0.0175777	-0.00574913	-0.0021529	-0.0016571	-0.00568263	0.00122318	0.00415138	-0.00769451	-0.00520318	-0.00362707	-0.00677353	-0.00893533	0.00189837	0.00880416	-0.0323628	0.0180782	0.0496069	-0.00514797	-0.0085908	0.0391779	0.000594159	0.00638967	-0.00490479	0.0025533	0.00365714	-0.00127564	-0.00159179	0.000699543	0.000204364	0.0127058	-0.0414947	-0.012111	0.00816267	-0.00995924	-0.000564733	0.013426	-0.00332083
L	CTC	0.00911618	0.0102751	-0.00386748	0.00364896	-0.000949997	-0.0116248	0.0125571	0.0164747	-0.00950679	-0.0150428	0.00916097	-0.00612729	0.00457032	0.00975421	0.0575936	0.0135691	-0.00340287	-0.00348832	-0.0190232	0.00579851	-0.0172441	-0.00115112	-0.015732	-0.00979115	-0.00667212	-0.0345351	0.0589347	0.0269762	-0.00865038	-0.0165166	0.0460439	0.0180286	0.000856726	0.0033375	0.0104108	0.0196009	-0.00602253	0.0165183	0.0489054	-0.018362	0.007445	0.0176875	0.0390894	0.0926288	-0.00943483	-0.0120958	-0.02172	0.0506578
L	CTT	0.00464043	-0.00734789	-0.00402442	0.0190335	-0.0103744	-0.0133081	-0.0533437	-0.0169099	0.003367	-0.0246534	-0.00157908	0.00448993	-0.0113617	0.00986578	0.0240761	0.00371334	-0.00523306	0.0262508	-0.00482479	-0.017563	-0.024946	7.96215e-05	-0.0258907	-0.00745189	0.00675626	-0.00539286	-0.00806595	-0.0253741	-0.00105251	-0.0473116	0.0336433	0.0213917	-0.0158349	-0.00208738	0.01558	-0.0195634	-0.0084271	0.0344066	0.0221415	-0.0367936	0.0215592	0.00018827	0.0717529	0.0289166	-0.00214719	0.0159323	-0.00526306	0.026125
L	CTA	-0.00471142	0.0182933	-0.0055011	0.00726269	-0.00949969	0.00391112	0.00884444	0.0239347	-0.0320548	-0.0284773	-0.00313073	0.0119566	-0.0320802	-0.0143219	0.0458031	-0.0029271	-0.0130421	0.00882732	-0.00424342	-0.0345113	-0.0161654	-0.0226768	0.00453579	-0.0143922	0.000999584	0.0155804	-0.00017906	0.0257067	-0.00743502	0.00501781	-0.0303858	0.0134851	0.0209027	-0.00243848	0.0384393	-0.00892851	0.0179756	-0.000703396	0.0277794	-0.000985684	-0.0144773	-0.0247303	0.0403122	0.0714742	-0.00132619	-0.0235819	0.00709317	0.0320014
L	CTG	0.00102023	0.00549219	0.000545417	0.0113622	0.00326278	0.00118702	-0.00286926	0.0269192	-0.000431268	0.00714481	0.0153785	0.00179282	0.0168063	-0.00356279	0.0558262	0.0184793	-0.00136899	0.00505506	-0.0198062	0.00874963	-0.00841256	-0.00852352	-0.00693196	-0.0241641	-0.0368556	-0.00210147	0.047945	0.0551038	-0.0156941	-0.000687787	0.0543902	0.0197682	-0.00225983	-0.0046662	0.012527	-0.0103823	-0.0211085	0.0333212	0.0666643	-0.000541967	0.0147676	-0.0189834	0.0423877	0.0467951	-0.0166211	-0.0146048	-0.00106681	0.027643
H	CAC	0.0159454	0.0235268	0.040715	0.0103152	-0.00381583	0.00968846	0.0385835	-0.00636598	-0.00924175	0.00683989	0.0121179	0.00436522	0.0132966	0.0113651	0.0517336	0.0147256	0.00706161	-0.0187229	0.0067201	-0.00612436	-0.00652839	-0.00827035	0.00202506	0.00951922	-0.0129661	0.00266279	0.0666196	0.0393659	-0.00781872	0.00821414	0.0947444	0.0326974	-0.0138068	-0.00231096	0.0290635	0.0311459	0.00719109	0.0079539	0.0946762	-0.00863135	0.0211243	0.00407401	0.0600925	0.112098	0.00745606	0.037251	0.068794	0.0484183
H	CAT	-0.00568994	0.00779794	0.0175314	1.55735e-05	0.00154283	-0.0240833	-0.00959939	0.0146897	-0.00700989	-0.0044568	0.00529529	-0.00258647	-0.00186503	0.0239037	0.0541669	0.053487	-0.00220144	-0.0317915	-0.0277659	0.00924898	-0.018473	-0.0108817	0.0050205	0.00119392	-0.0121865	-0.0482546	0.124792	0.0652795	-0.0126388	-0.00437059	0.0993691	0.0366128	-0.00767453	-0.00787465	0.00124084	0.00523863	-0.00371546	-0.00273641	0.0262036	-0.0115312	0.0170598	0.0122678	0.0930808	0.0986385	0.0102414	-0.0201017	0.120009	0.0957406
Q	CAA	0.000613603	-0.00859523	0.00523102	-0.0142393	-0.000993542	-0.0231856	-0.00840837	-0.00850631	-0.00622381	-0.00818906	-0.0180585	-0.0203608	0.000464749	0.00101671	0.0355927	0.0191003	0.0151191	0.00552878	-0.0049262	0.0216979	0.00884603	0.0047438	0.00590906	-0.0283442	-0.0159559	0.00720025	0.0352719	0.0948336	-0.000761103	-0.00727777	0.0434878	0.00625295	0.00836593	-0.00455655	0.00838014	-0.00241518	-0.000240127	0.00406795	0.01266	0.0125459	0.0152165	-0.0133375	0.021842	0.0105826	-0.00726792	-0.000968655	0.0697691	0.0370057
Q	CAG	-0.00114285	-0.0237369	0.00664632	-0.00342161	-0.00351533	0.00313914	-0.014998	-0.00679828	-0.0166189	-0.022083	-0.00531256	-0.00867576	0.00751098	0.00927051	0.0225664	0.00419165	0.00447821	-0.0152885	0.0148122	-0.00310935	-0.0271572	-0.0239717	-0.0557897	-0.00979387	-0.0228378	-0.0214942	0.0521742	0.0592272	-0.00337579	-0.0110562	0.0404811	0.0222042	-0.003671	0.00106045	-0.0180978	-3.16745e-05	-0.00637995	0.00191013	0.00256985	0.000764991	-0.000370618	-0.000828167	0.0460832	0.0154058	-0.0253933	0.0489862	0.0425112	0.0172411
R	CGC	0.000880378	-0.00576655	-0.0134939	-0.00257664	-0.00127254	0.00706477	-0.00955619	-0.00635483	-0.0115841	-0.00216358	0.00820214	-0.00734437	0.00611769	-0.00609288	0.0245154	0.00285754	-0.00242946	0.00133887	-0.0199339	0.00331024	0.00180433	-0.0108329	-0.012021	-0.00615602	-0.0276493	-0.0484889	0.00974098	0.0130363	-0.0112476	-0.0242921	0.0327708	0.0179163	-0.00312808	4.45322e-05	0.00331394	-0.0110498	-0.00670186	-0.0309302	-0.00987124	0.00209847	-0.0171868	0.00406625	0.00582609	0.0370584	-0.0129701	-0.00320392	-0.00198654	0.0140943
R	CGT	-0.00756578	0.00373991	-0.00289437	-0.00418904	-0.00993456	-0.00814315	0.0251583	0.00392122	-0.00866816	-0.0154794	0.00138149	0.00755824	0.00241323	0.00784199	-0.0175448	-0.00606512	-0.0265719	-0.00574997	-0.0167749	-0.00914617	-0.0191788	0.0113096	-0.0187115	-0.0317982	0.00377211	0.00801772	-0.0329968	0.00284915	0.00370958	0.011278	0.0248527	-0.00518375	-0.00408613	-0.00330709	0.0277685	-0.00479311	-0.00215827	0.0120534	0.00234743	-0.0320976	-0.00509819	0.00336346	-0.00723482	-0.00118136	0.0127176	0.0101602	0.0312832	0.00958181
R	CGA	0.0129624	0.013428	0.00635782	-0.00854449	-0.0119601	-0.00505163	-0.042946	-0.00322141	0.00277446	-0.0267659	0.00936019	-0.0157268	-0.00296257	-0.00528153	0.00585009	0.0138428	-6.46913e-05	-0.00989928	-0.0162813	0.00365538	0.010158	-0.024098	-0.0268783	0.0077303	-0.00554479	0.0194506	-0.0365597	-0.00626862	-0.00837033	-0.000285177	-0.0190432	-0.00199989	-0.00190832	0.0149157	-0.0477848	-0.00235199	0.00972067	-0.0249812	0.0145809	0.0100852	-0.00391629	-0.0291365	0.0187468	0.052653	0.00243167	-0.0476464	0.073196	0.0298331
R	CGG	0.00558969	-0.00085928	0.00435882	-0.00404513	-0.00630677	-0.0155676	-0.00171205	0.00634593	-0.007451	-0.0162854	-0.0022075	-0.0153278	-0.0037689	0.000193023	0.0111693	0.00534083	-0.00718991	0.00413837	0.00207303	0.00254558	-0.0115132	-0.0136431	-0.00982603	-0.00213139	-0.00611101	0.0111686	-0.00150574	-0.046204	-0.00755011	-0.0116081	-0.0231454	-0.00225862	-0.00104014	-0.0116977	-0.0116747	-0.00990022	-0.00788386	0.0048236	-0.0177152	-0.00790332	-0.0175783	-0.0363833	0.00412844	0.0347553	-0.000433691	-0.0157239	0.0092848	0.00988538
S	TCC	0.000686235	0.00650914	0.00889965	-0.00387203	0.00322037	0.0207431	-0.00526792	-0.00195935	-0.00366601	0.00445786	-0.0017608	-0.00058174	0.00237331	0.0112124	-0.00298993	0.000576294	-0.00551936	-0.0159077	-0.00567301	-0.00330424	-0.020819	-0.00877189	-0.0151021	-0.00371225	0.00438226	0.0132848	-0.0157285	0.029533	0.00903312	-0.0177782	0.0367051	0.00140433	-0.0076357	-0.0189437	-0.00715871	0.00811477	0.00383458	-0.00881574	-0.0006363	-0.0111851	0.0103248	0.0146179	0.0157791	0.0182741	-0.0055614	0.0202997	0.00659785	0.00598249
S	TCT	-0.00636619	0.00597235	0.0137202	0.0031643	-0.000666271	-0.000204274	0.0242633	-0.0076788	-0.00357488	-0.0136601	-0.00392626	0.00406109	-0.00130793	-0.00290839	0.0334122	-0.000717112	-0.00649928	0.00889254	0.0104219	-0.0147394	-0.0175177	0.0036905	-0.0357793	0.00416458	-0.00694133	-0.00962819	0.0131073	0.0262057	0.00170182	0.00347236	0.00594843	0.00906559	-0.0153015	0.0211478	0.00602291	0.0253507	-0.0214431	-0.00436726	-0.0122558	0.000352892	0.0174256	0.0654448	0.0180203	0.0309086	0.00520012	-0.0212554	0.00107698	0.0193263
S	TCA	-0.00297064	0.00706024	0.0188254	-0.0189287	-0.00614593	-0.0188107	-0.0539839	-0.0140748	0.00224913	-0.0342307	0.016458	0.0141883	-0.0105137	-0.0157134	0.0320572	0.00528379	-0.00933363	-0.0243774	-0.041168	-0.033564	-0.0382686	0.000695258	-0.0127892	-0.0138352	-0.0046599	-0.00294395	0.0459865	0.0586379	0.00478002	-0.000850944	0.0502868	0.0358551	0.000949925	-0.0102159	0.00729895	-0.00857581	0.0260944	-0.050254	-0.0316321	-0.00908931	0.00683617	0.00948314	0.0319455	-0.00142361	-0.0224724	0.00544644	0.00179367	0.0426535
S	TCG	0.00708255	0.00895553	-0.00134031	-0.000112981	-0.00959544	-0.00200117	-0.0252396	-0.00748428	-0.00771563	-0.00553469	-0.0191425	-0.00516253	0.00112937	-0.0146421	-7.55423e-05	-0.00414364	-0.0139351	0.00286004	0.0165152	-0.012377	0.00813765	-0.00650511	0.00769218	-0.0357557	-0.0108233	-0.0028195	-0.0486931	0.0515993	0.00650448	-0.0182779	-0.0379778	0.0231419	0.00792508	-0.0126488	-0.020514	0.0186118	-0.00347162	0.00408564	0.00752637	0.00436892	0.00167665	-0.0252329	-0.0169719	0.00349394	-0.00350446	0.00336636	0.0230497	0.0363323
F	TTC	0.0111513	0.0417341	0.0276187	-0.0113699	-0.00698673	0.0231367	-0.0383806	-0.0193166	0.0185528	-0.00773145	0.021748	0.00902372	0.0321456	0.0422155	0.0785453	0.0266428	0.0128039	0.017494	-0.0544637	0.0223402	-0.00421348	-0.0169818	0.0158858	0.0432848	0.00149587	0.00619939	-0.0210891	0.0454878	0.00667661	-0.0136622	0.0930575	0.0354978	0.00543694	-0.0159819	0.00847354	-0.0215336	0.00898368	0.0142792	0.0305211	-0.00998984	0.0158137	0.00889053	0.0400714	0.0367755	-0.00480577	0.00464168	0.0246635	0.0388354
F	TTT	0.0157607	0.012886	0.0186413	-0.00824753	-0.00892177	0.0258665	0.0165694	-0.00556029	0.00699204	0.017456	-0.0184696	-0.00610267	-0.0028921	0.0126279	0.0469212	0.0176665	-0.00394483	0.0110705	0.0151141	0.00818682	0.014691	-0.012744	-0.00781984	0.0324197	-0.0165971	0.00452741	0.0504042	0.0597006	-0.0199371	0.0147417	0.129869	0.0316333	-0.00174413	0.0186464	0.0163603	-0.0115158	0.000217376	-0.0624012	0.0268202	-0.0191158	-0.0136209	0.0645679	-0.0123701	0.0650258	-0.0264086	-0.00325169	0.0411146	0.00465488
L	TTA	0.000798606	0.00146981	-0.0194817	0.00438548	0.00301152	-0.00861187	0.037808	-0.00281965	0.0105307	-0.0103328	0.0208809	0.00532956	-0.00882704	0.0163523	0.0402847	0.0325309	0.0173256	-0.0202582	0.00660809	0.00990929	-0.0372887	-0.00700646	0.00920221	-0.00253733	-0.0186243	-0.0917037	-0.00889823	0.0206562	-0.0292379	-0.0104702	0.0521017	0.0180009	0.000724144	0.00188619	0.0146166	0.0161629	0.00382154	0.0137068	0.0144739	-0.0129815	0.00593362	0.00894607	0.0537044	0.0676255	-0.0533846	0.00877821	0.0476097	0.0623291
L	TTG	0.0102308	0.00741458	0.00812862	-0.00242573	0.00276481	-0.01531	-0.0273977	-0.00863329	-0.00998964	0.0112337	0.0221155	0.00735453	-0.0108244	0.00102499	0.0485276	0.00949922	-0.00859518	-0.0042322	0.00380218	0.00523357	-0.00443645	0.000297911	-0.0429398	0.0113564	-0.0318639	0.0234021	0.0532869	0.0938266	0.025022	-0.00579871	0.035854	0.023191	-0.0124516	-0.0123374	-0.00490203	0.00640046	0.0125697	0.00254932	-0.00252568	0.00564838	-0.00502074	-0.00651183	-0.012303	0.0763835	0.0211238	0.038706	0.0289595	0.0176999
Y	TAC	0.0173227	0.0185819	0.0291481	0.0106813	-0.0171588	-0.00722548	0.0576704	0.00647749	-0.00107165	-0.0101982	-0.034573	0.046675	-0.0231077	-0.00298673	0.0959956	0.0176156	0.00521057	-0.0013473	0.015153	0.00168685	-0.0188382	0.00201071	0.0359396	0.058256	0.00193085	0.0105187	0.0807775	0.0569715	-0.0123607	0.0107847	0.165033	0.0515761	-0.00228326	-0.00227781	-0.0391104	-0.00203633	0.0217499	0.00410421	0.028229	-0.0305173	-0.00426981	0.0370744	0.105879	0.076455	-0.00484378	-0.00161242	0.100312	0.0608973
Y	TAT	0.0181815	0.0124508	0.0472836	0.0180986	0.0058556	-0.0231906	-0.0199464	-0.0202632	0.0114928	-0.00792711	0.0244294	-0.00747115	0.00774073	0.00654265	0.0150841	0.0158665	0.00148006	-0.00375386	-0.0103147	0.0121633	0.026887	0.0220573	0.023897	0.00961748	0.00181732	-0.0228545	0.031438	0.0530785	-0.0188629	0.0311723	0.183731	0.0871043	-0.00375134	-0.0286461	0.0268439	0.00833829	0.0135539	-0.0139929	0.0347138	-0.00558383	0.00872285	0.0355653	0.0425458	0.087802	0.0251985	0.0176005	0.0858715	0.0747321
*	TAA	N/A	N/A	N/A	N/A	N/A	N/A	N/A	N/A	N/A	N/A	N/A	N/A	N/A	N/A	N/A	N/A	N/A	N/A	N/A	N/A	N/A	N/A	N/A	N/A	N/A	N/A	N/A	N/A	N/A	N/A	N/A	N/A	N/A	N/A	N/A	N/A	N/A	N/A	N/A	N/A	N/A	N/A	N/A	N/A	N/A	N/A	N/A	N/A
*	TAG	N/A	N/A	N/A	N/A	N/A	N/A	N/A	N/A	N/A	N/A	N/A	N/A	N/A	N/A	N/A	N/A	N/A	N/A	N/A	N/A	N/A	N/A	N/A	N/A	N/A	N/A	N/A	N/A	N/A	N/A	N/A	N/A	N/A	N/A	N/A	N/A	N/A	N/A	N/A	N/A	N/A	N/A	N/A	N/A	N/A	N/A	N/A	N/A
C	TGC	-0.00614384	-0.00529182	-0.00371914	-0.000771861	-0.0100252	-0.0201056	-0.00095086	0.00414628	-0.00844785	0.0154267	-0.0303449	0.00407604	-0.0108363	-0.0141256	0.00554419	-0.0017296	-0.00514151	0.0129337	-0.00553609	0.000256593	-0.0133523	-0.00738879	-0.0229952	-0.00658743	-0.0436064	-0.000417234	0.0528471	0.0146735	-0.0130269	0.00128205	0.0166043	0.00736535	-0.0018453	-0.0167128	0.00645008	-0.00898293	-0.0125598	0.0076042	-0.0120908	-0.00252712	0.0168527	0.00309627	0.0391971	0.0354727	0.00363497	0.00526786	0.0442374	0.0094173
C	TGT	-0.0198803	-0.0232033	-0.0104126	0.00356712	-0.0009133	0.0191077	0.00921003	-0.0127199	-0.00762972	-0.0229608	-0.0106595	-0.0101147	-0.00927331	-0.0216422	0.0099167	0.00798652	0.00463363	-0.0209017	-0.0130567	-0.00845435	-0.00544052	-0.0310393	-0.0572868	-0.0149167	-0.0111885	-0.0264446	-0.0119775	0.0571923	0.0153175	0.00454497	0.00826712	-0.0088867	-0.00754496	-0.00673947	0.0023555	-0.0373618	0.0039187	-0.0114852	-0.0417273	0.0138584	-0.0181751	0.0156743	0.016263	-0.0270786	-0.020535	-0.00770351	0.0348082	0.0244892
*	TGA	N/A	N/A	N/A	N/A	N/A	N/A	N/A	N/A	N/A	N/A	N/A	N/A	N/A	N/A	N/A	N/A	N/A	N/A	N/A	N/A	N/A	N/A	N/A	N/A	N/A	N/A	N/A	N/A	N/A	N/A	N/A	N/A	N/A	N/A	N/A	N/A	N/A	N/A	N/A	N/A	N/A	N/A	N/A	N/A	N/A	N/A	N/A	N/A
W	TGG	-0.00393859	0.00700993	-0.0058201	-0.00845984	-0.00900454	0.00110351	-0.0188107	-0.00485011	-0.0165679	-0.00650374	-0.0077912	-0.00372774	0.00430372	0.0170473	0.0618528	0.00879044	0.0052236	-0.0012868	-0.00872272	0.00676524	-0.00430259	-0.00503541	-0.00794563	-0.0253238	0.000196913	-0.00971599	-0.000599195	0.0793522	-0.0135374	-0.00514873	0.0372473	0.00590526	-0.00402819	-0.00841131	-0.00429927	0.0138504	-0.021204	0.0106538	-0.00682923	-0.0392138	0.0251978	0.0145747	-0.00968534	0.065956	0.00168213	0.0254968	0.0115729	0.030209
T	ACC	-0.00170453	-0.00507693	0.00914077	-0.0059676	0.00935289	-0.0280497	-0.0245929	-0.0112901	0.000557854	-0.0115456	0.000311409	-0.0161435	-0.00454795	0.00287187	0.00992094	-0.000288603	0.00607097	-0.0251858	-0.014114	-0.00961377	-0.00129088	-0.00249568	0.00833678	-0.000719609	0.0162314	-0.0214981	0.0155964	0.0553864	-0.00979348	0.000700572	0.0214694	-0.00345675	-0.0327148	0.00503259	-0.0207705	-0.00994092	0.00200358	-0.0104995	-0.0158708	-0.0237281	0.00112028	0.0294224	-0.00401335	0.0352454	-0.0142093	0.0420368	0.040078	0.0168889
T	ACT	-0.0116696	0.0131621	-0.00556103	-0.027497	-0.0231974	-0.0191088	-0.00215726	-0.0500551	-0.00505154	-0.0204996	-0.0349972	-0.00695655	-0.00790778	-0.000110287	0.0107518	-0.0179349	-0.0155065	-0.0428836	-0.0165447	-0.0130163	-0.00463175	-0.022375	0.00543401	-0.00953113	-0.0171507	-0.00327399	0.0127526	-0.00112541	0.00352429	-0.0281129	0.0538375	0.0225706	-0.00482465	-0.0177933	-0.0212058	0.0124927	0.0167573	-0.0203621	-0.0473095	-0.0398978	-0.0237142	-0.00616421	0.00808723	0.0106004	-0.00630284	0.00611002	0.0320821	0.0372271
T	ACA	-0.00795978	-0.0115643	-0.018984	0.00127601	-0.000769655	0.0166326	0.00378244	-0.0254723	0.00515762	-0.0130249	0.00210833	0.00211133	0.00535927	-0.0312881	0.0345217	-0.00841295	-0.012586	-0.0124603	-0.0381879	-0.00322437	-0.0138907	-0.00602413	-0.00558703	0.000318936	-0.0218974	0.00459623	0.0566718	0.0662529	0.00578861	0.0124458	0.0191276	-0.00587056	0.00330434	0.00696904	-0.0237722	0.00582038	-0.00674282	-0.00685724	-0.00195285	-0.0138162	-0.00135071	-0.00191585	-0.0128493	-0.0206952	0.00542698	0.00320233	0.000638036	-0.00470433
T	ACG	-0.00512001	-0.007358	-0.00628448	-0.0145135	-0.0195962	-0.00881821	0.0196309	0.00341934	-0.00091993	0.0264322	0.00553769	-0.0141039	0.00164925	-0.000433068	-0.00891818	-0.0112115	-0.000617644	-0.0280274	0.0154299	-0.000959564	-0.0142617	-0.00270682	-0.00749127	-0.00301111	-0.0476868	-0.00910791	0.0290873	0.0156076	-0.00708408	-0.00481409	0.0387749	0.00695114	-0.00951529	-0.00912032	-0.000740547	0.00500668	-0.0179097	-0.00612473	0.0182495	-0.0033652	0.0165619	0.00322679	0.00603922	0.00671422	0.0223498	0.0321389	0.000727997	0.00791832
I	ATC	0.000246668	0.0347343	0.0405733	0.00451743	-0.010459	-0.0310157	0.025368	-0.0233332	-0.0081506	0.0081999	-0.0070254	-0.0105635	0.0132228	0.00112414	0.0804356	0.00229865	-0.00221825	-0.0211088	-0.0576665	-0.00315549	0.0160505	-0.0255238	-0.0187489	-0.0316826	-0.013654	-0.0177734	0.0659405	0.0651083	0.017928	0.00513798	0.0918816	0.0124263	-0.0248145	-0.0222112	0.0174692	-0.0387674	0.0059238	0.0190376	0.0154092	-0.00765581	0.00120643	0.0668216	0.0228521	-0.0368786	0.0060341	0.0255533	-0.0142219	-0.00202406
I	ATT	0.00573009	-0.00122175	0.0380188	-0.00910274	-0.0103188	-0.028356	-0.0473219	-0.0318284	-0.0257176	-0.00172803	-0.00304898	-0.0239918	0.0106538	-0.014854	0.0333953	0.000666371	-0.00724627	-0.0385223	0.00271371	-0.0175554	-0.0025741	-0.00554309	-0.00705378	-0.0142335	0.00382182	-0.00939967	-0.00253901	-0.0245706	-0.00825417	0.0220463	-0.00454752	-0.0051533	-0.0219981	0.0150314	-0.00631375	-0.00887194	-0.021764	0.00467176	-0.0269766	-0.031004	0.00312399	-0.0147288	0.0301251	0.016448	0.0214982	-0.0480676	0.020844	0.0158532
I	ATA	0.00459357	-0.0228574	0.0177232	0.0128811	0.0011645	-0.0102782	-0.0153012	0.000757712	-0.0138095	-0.0312252	0.0014546	0.0104041	-0.00429909	0.00480796	0.0297987	-0.00643194	0.0206809	-0.00419877	-0.0108339	-0.0156977	-0.0334087	-0.02265	0.0130307	-0.0046955	-0.0136168	-0.043287	0.00795207	0.0966699	-0.00313298	-0.0214229	0.0884609	0.0154505	-0.000283212	-0.0311554	-0.0244932	0.029795	0.00117365	0.00364163	-8.36135e-05	0.00849456	-0.021687	0.0131282	0.0143632	0.0236319	-0.0333585	0.0461381	0.0258262	0.0413126
M	ATG	-0.0214587	-0.00413988	0.0258422	0.00841793	-0.0105387	0.0175008	0.00197048	0.00482543	0.00180872	-0.00135173	-0.00377829	0.00677839	0.0171631	-0.00510825	0.0409355	0.0161655	-0.0263342	0.00892012	-0.0196062	0.00508357	0.0111113	0.0151208	-0.0204703	0.0151606	-0.046793	-0.0201926	0.0871041	0.0320223	0.00116756	-0.00688343	0.0172997	0.00298546	0.00954284	0.024438	-0.00509141	-0.00520912	0.0106583	-0.000443811	0.00484037	0.019693	-0.0196532	-0.019695	-0.00721802	0.0202817	-0.00560576	0.0639427	0.0195458	0.0254359
N	AAC	0.0121619	0.00788951	0.0198055	-0.00486105	-0.00435269	-0.0161577	-0.00465921	0.0339137	-0.012404	-0.00134734	0.000674687	-0.0150385	-0.00247319	-0.0117662	0.0281558	-0.00938468	-0.00702797	-0.0204179	0.00383624	0.0151093	-0.00908289	-0.021561	-0.00994942	-0.00257316	-0.0198181	-0.035378	0.09451	0.0876032	-0.00416448	-0.0171561	0.0214453	0.0242483	0.00430039	0.00830306	-0.0129273	0.0109601	0.0174669	0.0172506	0.00176469	-0.0130854	-0.00616857	0.0246024	0.0412343	0.0360621	-0.00207823	0.00170349	0.0434924	0.0386182
N	AAT	-0.016226	0.00634065	0.000539846	-0.0126275	0.00771837	0.0187374	-0.0173633	6.95353e-05	-0.0252271	0.00154746	-0.0138364	-0.00949505	0.00381096	-0.0141153	0.0114131	-0.0150495	-0.00661148	-0.00604459	-0.0288282	-0.0175364	-0.039023	-0.00865793	-0.0340784	-0.0218421	-0.0338079	0.0169206	0.0810956	0.079046	-0.0116213	0.0338579	0.0809352	-0.00237792	-0.00556547	0.0153174	0.0293421	0.0167011	0.00204943	0.0145581	-0.0541573	-0.0145457	0.00944822	2.43074e-05	0.0280975	0.0260063	0.0127263	-0.0420845	0.0313229	0.0585789
K	AAA	0.0163311	-0.0191229	-0.00202839	-0.00211979	0.00447015	0.0191573	-0.0248091	0.0122048	-0.00780535	-0.00171164	-0.0203087	-0.0100001	-0.00789263	0.00989692	0.0139155	0.019975	-0.011893	-0.0128008	0.0105098	-0.0201916	-0.000481233	0.0115374	-0.0383812	-0.013103	-0.0132198	-0.0141492	0.0165439	-0.0252959	-0.0235076	0.0169872	0.00305144	0.00247447	-0.00541448	0.0036886	-0.0109985	0.0271782	0.0181359	0.0240418	-0.0198013	-0.0293666	-0.0366378	0.00105322	-0.00864552	0.0061008	-0.00888502	-0.00389316	-0.0165444	0.00373363
K	AAG	0.00235514	-0.00105785	-0.00730356	-0.0082234	-8.82105e-06	-0.0154077	-0.0245453	-0.00103184	-0.00775744	-0.0363523	-0.00449256	-0.010854	0.00803148	-0.00339612	-0.00715238	-0.0146871	0.00290579	0.00419352	-0.0095196	-0.0024194	-0.0362493	0.0044018	0.00420868	-0.0199714	-0.00382036	-0.028545	0.00436783	0.038901	0.0445343	-0.0177603	-0.00947947	0.0219644	0.0202279	0.0068355	-0.000930816	-0.0453134	-0.0251684	-0.00620603	-0.0184614	0.00720645	-0.000472465	-0.0278162	-0.00199097	-0.00348649	-0.00849159	0.00538642	-0.00339959	0.0128758
S	AGC	-0.00269522	0.00298614	-0.00060763	0.0068864	0.00992234	-0.0163638	-0.0237273	0.00120514	-0.0188558	-0.023954	-0.00447096	-0.00602174	-0.00618767	-0.00200418	0.0514464	-0.0057866	-0.0141666	0.00434149	0.00361441	0.00878948	-0.0268088	-0.0137738	-0.0212392	-0.0174635	0.00630186	0.00412235	0.00716377	0.0309008	-0.0170637	-0.0119108	0.0202647	0.0169169	0.000624664	-0.0410574	0.0160147	0.00271362	-0.00643052	-0.0289829	0.0494482	0.00625152	-0.00372233	0.0107984	0.0227461	0.0655875	0.00294895	-0.0267462	0.0390177	0.0282248
S	AGT	-0.029721	-0.0180648	-0.00664804	0.000382192	-0.0336242	-0.00317422	-0.0131902	-0.0412232	-0.0141488	-0.00345184	-0.00239715	0.0101203	-0.00231308	0.0101898	0.0182418	0.00547298	0.0072681	0.0114278	0.00278344	-0.00771392	0.0119391	-0.0440532	0.0116766	0.00401888	0.0104548	0.0420812	-0.0500653	-0.0197323	0.0110134	0.00757327	-0.0225677	-0.0451222	-0.00955369	0.00431553	-0.0088904	0.03257	-0.00776701	-0.00560516	-0.00630655	0.0131613	-0.0125654	-0.0214982	0.0338822	0.0149654	0.0136769	0.0145785	0.0431328	-0.00492577
R	AGA	-0.0104443	-0.00279355	-0.0157075	0.0105478	0.000398751	-0.00369222	-0.00445091	-0.0128814	-0.016773	-0.0248661	-0.0162057	0.00656762	-0.00335911	-0.01605	-0.000814687	-0.0146152	-0.0252939	-0.0198806	0.00542097	0.00288918	-0.00798139	-0.0326728	-0.0103743	0.00867589	-0.0117059	-0.00921359	0.0240786	-0.0209566	-0.0102785	0.00894376	-0.0590902	0.0210089	-0.0111791	0.00692452	-0.0387184	0.0174166	-0.0327223	0.000859722	-0.0174042	-0.0449272	-0.0153613	-0.0363149	0.0225324	-0.00100379	-0.00360396	-0.0285032	0.0112066	0.00881887
R	AGG	-0.00758836	-0.000927143	-0.00943455	-0.0156486	-0.0225987	-0.0196119	-0.0557145	-0.0211706	-0.0180544	0.00740141	-0.00929275	0.0215951	0.01172	0.00358103	0.00700415	-0.00290085	-0.0102772	0.0149431	0.0101146	0.0313902	-0.0122652	0.00342657	-0.0120296	-0.0070282	-0.0024024	0.00168464	-0.0334074	-0.00876652	0.00496624	0.0175254	0.0258247	-0.0154947	-0.000760491	0.0118683	0.00786091	-0.00481662	-0.00874185	-0.00557523	-0.0114134	-0.0148653	-0.014885	-0.00422795	-0.0333261	0.0550264	-0.0369319	0.0379235	0.00100459	0.0262645
A	GCC	-0.00472791	-0.00279487	0.00224753	-0.0110262	-0.00164997	-0.023806	-0.0188671	-0.00739564	-0.00166125	-0.0253816	-0.00858333	-0.000234713	-0.00759258	-0.0061563	0.0204744	-2.85153e-06	0.0028275	-0.0206949	0.00546279	-0.00569974	-0.00267292	-0.0157591	0.00984471	0.016389	0.00551799	0.00667944	-0.0148556	0.0256963	-0.00967767	-0.0340263	0.0263099	0.00198186	0.00161011	0.00332392	-0.0205425	-0.000348461	-0.00684285	2.15814e-05	-0.00907594	0.0166488	0.00513657	0.0196884	0.0164132	0.0141104	-0.0117551	0.0213626	0.0277505	-0.00893326
A	GCT	0.00244095	0.000808275	-0.00150497	-0.007935	-0.0208696	-0.00952812	-0.0199757	-0.0123335	0.0079489	-0.00289924	-0.0130735	-0.0129038	0.00226624	-0.00185665	0.0318214	0.00571992	-0.00717526	-0.0112151	0.00472136	0.00473701	0.00548887	-0.0310017	-0.0126514	-0.0093568	0.0167597	-0.0101866	-0.00728871	-0.00279427	-0.0144481	-0.00734987	-0.000309463	0.00849042	-0.00717572	-0.0198112	-0.00932012	-0.00491495	-0.00703879	-0.0124151	-0.0080861	-0.021878	0.00180774	0.0126069	0.017457	0.0470857	0.00836088	0.00238193	0.033812	-0.00253457
A	GCA	-0.00529995	-0.010373	-0.0185532	-0.00284977	0.00876112	-0.00327374	-0.0240935	-0.0319376	-0.00589975	-0.0337356	0.0227334	-0.00999186	-0.00572467	-0.0228206	0.00617648	0.00107867	-0.0031523	-0.0127968	-0.0174283	-0.0205031	-0.0150841	-0.0217114	-0.0329442	-0.00975648	-0.0228779	-0.0292713	-0.0204639	0.00230111	-0.00596191	0.0253057	-0.0122522	-0.0184308	-0.000193805	-0.00686762	0.00517893	0.00923626	-0.0188839	0.000739094	0.032511	0.00250534	0.00941228	-0.00685517	0.0160269	0.0119388	-0.00160963	0.0190289	0.00486639	-0.00617062
A	GCG	-0.00216701	0.00982438	0.00259146	-0.0104205	-0.0144238	-0.0107552	-0.00917488	-0.0106832	-0.0107635	-0.00231971	-0.0184131	-0.0164123	0.00582984	0.00647892	0.0219487	0.00181382	-0.00544502	0.0101781	-0.0127808	-0.0103869	-0.0132193	0.0107646	-0.00866728	-0.0110244	-0.0117345	0.0213489	-0.0925586	0.00167578	-0.0190462	-0.0172639	0.00736076	-0.00450727	-0.0204356	0.000730917	-0.0206837	-0.00479291	0.00519827	-0.0245693	0.0159224	-0.00276727	0.0076661	0.0182173	0.00694797	0.00520476	0.000826963	-0.00731618	0.0259005	0.00732006
V	GTC	0.00309388	-0.0054003	0.000202599	0.00607664	-0.00446141	-0.0144852	-0.00936707	-0.00081354	-0.00484595	-0.0247158	-0.0185684	0.0209828	-0.00934454	-0.0211295	0.0314447	0.00324104	0.00439209	-0.0127856	-0.0146039	-0.00331002	-0.00767531	-0.0275138	-0.0142307	0.00508512	-0.00193975	-0.0401518	-0.0669484	0.041061	-0.007611	0.00170108	0.100906	0.000350171	0.00921585	-0.00826243	-0.0248424	-0.00608755	-0.0210425	-0.00294142	0.000309717	-0.0127482	-0.0107829	-0.00885644	-0.00611422	-0.0111279	-0.0230308	0.0186491	0.0356929	-0.00342009
V	GTT	0.000996517	0.000873807	-0.0129863	0.00450293	-0.0125501	0.00417373	-0.042592	-0.0310165	-0.00525569	-0.00781047	-0.0134241	-0.00990579	-0.00516794	0.00489119	0.0153121	-0.00227896	-0.000825193	0.0308879	0.00346524	0.0107794	-0.018066	-0.0207184	-0.00814326	0.0122708	0.00144687	0.00276343	0.01758	-0.012513	-0.0100536	0.00198483	0.0589038	0.0307939	-0.0216207	-0.014608	-0.0130429	0.0172582	-0.0142285	-0.0226146	0.0420534	-0.0243091	0.00872583	0.0532066	-0.0238911	0.0340877	-0.00352705	-0.005922	0.00139246	-0.0108548
V	GTA	-0.00291442	0.000989789	0.00782831	-0.014634	-0.0081514	-0.0463213	-0.0370767	-0.000244618	-0.016997	-0.0501972	0.010188	0.00819645	0.000730849	-0.0320471	0.0100506	-0.00370326	0.00191344	-0.0327823	-0.0213469	-0.00954001	-0.012454	0.0170222	0.0191061	-0.0069151	-0.0121266	0.022628	0.0198853	0.0280338	-0.0140899	0.00236501	0.0724762	-0.0221919	-0.0132388	0.0279424	0.0259602	-0.0113261	0.00673466	-0.000694385	-0.0447309	0.00216944	0.0109508	0.00235073	0.0155711	-0.0300942	0.00466844	0.0101085	0.100029	0.00321181
V	GTG	0.0100461	-0.0115212	-0.00974786	0.00331615	0.00111247	-0.0331541	-0.011049	-0.0108644	-0.0183119	-0.00104346	0.0105496	-0.0237058	0.00341816	0.00636995	0.0271851	-0.00687211	-0.00839305	-0.0239081	0.00365374	0.0151051	-0.00650848	-0.0105912	0.0135698	0.0261127	-0.0284927	-0.000300207	-0.0239474	0.0458834	-0.00344947	0.00319103	0.0191093	0.0107046	-0.00830035	0.022127	-0.00614429	0.000673116	-0.00841513	-0.0115004	0.0488328	0.00581323	-0.00696076	-0.00844022	0.0615524	0.0180694	-0.0140308	0.0141843	0.00595145	-0.0154476
D	GAC	0.00880172	0.00725139	0.010946	0.00156685	-0.0131432	-0.0102333	-0.00698247	0.001988	0.000661954	0.0173176	0.00873653	0.027952	-0.00954485	0.000258847	0.0379994	0.00543458	-0.00238262	-0.0297256	-0.0256325	-0.00547183	0.00600481	-0.017626	-0.00799113	-0.00606842	-0.00334739	-0.0173867	0.062626	0.0516518	0.00104685	0.00368532	0.0494232	0.0169707	-0.00144588	0.0287237	0.0283376	0.00755947	0.0117636	-0.000840903	-0.0326622	0.0163316	0.0146568	0.0169032	0.0158145	0.0487946	0.00237513	0.0205079	0.0388974	-0.0164016
D	GAT	0.0070392	0.00997435	0.00459623	0.00218546	-0.00749563	0.0025504	-0.0301774	-0.0301522	-0.012359	-0.0188986	-0.0113079	0.0135444	0.0175817	0.01756	-0.00655578	0.00377608	0.019336	-0.0143731	0.0448314	-0.023152	-0.0129326	0.00165059	-0.051471	-0.00843052	0.0359055	0.0176924	0.0756066	0.00860679	-0.00712362	0.0280413	0.10587	0.0477565	0.00310428	-0.0327193	0.00931776	0.00357758	-0.00723574	-0.00594173	0.0181628	6.6379e-05	-0.00345009	-0.069839	0.0158397	0.00869126	0.00367263	0.00829627	0.0441499	-0.0102041
E	GAA	-0.00293131	-0.00590769	0.0207459	0.00677021	-0.0141947	-0.00837297	-0.00218284	-0.00216634	0.00329167	-0.0202344	-0.0191981	0.00244963	0.0116573	-0.00111215	0.00412034	0.0090806	0.00973583	-0.0199786	0.0114036	-0.00698414	-0.00728641	-0.07159	-0.0456441	-0.0065934	-0.0137412	-0.0154524	0.017169	-0.00524768	0.0176117	-0.00142968	0.0141743	0.0176693	0.0108796	0.010396	0.0139484	0.00431114	-0.00521515	-0.0117715	0.0252469	0.0177434	-0.00268231	-0.0248156	0.0107827	0.00410831	0.0181386	0.0499769	0.00672918	0.0129722
E	GAG	0.00575153	-0.030334	0.00749825	0.0187789	-0.00435934	0.0105789	0.0141372	-0.0165219	-0.00927978	0.00735887	-0.00722763	-0.0189619	-0.00173556	-0.0223159	0.0186799	-0.012144	-0.0152659	-0.00453593	-0.0277295	-0.0134743	-0.0249459	0.0164063	0.00894865	0.0140502	-0.0238338	-0.0270966	0.0388292	0.0525451	0.013749	-0.00306159	-0.00451486	0.0199296	0.0134523	-0.00846342	0.0109164	0.0226237	-0.00561861	-0.0371928	0.00647444	-0.01468	0.01298	0.0223647	-0.0473234	0.0330221	0.00326706	-0.0181466	0.0332795	0.0111035
G	GGC	0.00274145	0.00394016	0.00665826	0.007325	-0.0119693	-0.00833449	-0.0156708	-0.00836017	-0.0111105	0.00519762	-0.0163658	0.00212802	-0.00332434	-0.00406107	0.0341373	0.0041264	0.00280979	-0.00440268	0.00253198	0.00164589	-0.000953048	-0.0361846	-0.0387786	0.00277854	-0.00167279	0.00244068	0.039776	0.0230508	0.00467516	0.0113711	0.012611	0.026753	0.00443741	-0.018059	-0.00567571	-0.0189822	-0.000319194	-0.0250052	0.00736998	-0.00760938	0.0125834	-0.00276105	0.0102418	0.0228954	0.00788195	-0.014127	0.0132777	0.0211469
G	GGT	0.000876584	0.00820744	0.0204572	-0.00202214	-0.00911706	-0.00613043	-0.0318074	-0.00563393	-0.00213337	-0.00461801	-0.00380738	-0.00333132	-0.00179811	0.00617589	0.0199298	0.00770696	-0.0203286	-0.00581815	-0.0104948	0.000308392	-0.00398314	-0.00263496	-0.00371368	0.00418211	-0.0166396	-0.00135475	-0.0327571	0.0840565	-0.00159614	0.00464764	0.0407603	0.00616449	0.00440427	-0.00914243	-0.0350421	-0.00602354	0.012122	-0.00391094	0.0171626	-0.00468019	-0.000152003	0.0142867	0.0280137	0.0313015	-5.91734e-06	0.0278761	0.0115291	0.0117677
G	GGA	-0.00920719	-0.0074545	-0.00908798	0.000196336	-0.00685605	-0.026791	-0.0345928	-0.0207415	-0.00377657	-0.010085	-0.0305537	-0.000531953	-0.00547437	-0.0271778	0.0216194	0.00683224	0.000907896	-0.00477138	0.00556003	-0.0163727	0.00479778	0.00563413	0.00171182	-0.0119633	0.00644774	-0.00878029	-0.0277936	0.0488951	0.00403007	0.00591685	0.0681113	0.010189	-0.0109159	-0.0402112	0.000860534	0.00342627	-0.0277394	0.00370587	-0.00889919	-0.00965469	-0.0117585	-0.000528634	0.0592033	-0.00620942	-0.0113	0.0261839	0.0695373	0.0127254
G	GGG	0.0088743	0.00315321	0.00837918	-0.00185042	-0.00807514	-0.0111674	0.0180134	0.00100531	-0.00788893	-0.0100724	-0.0143133	-0.00333644	0.00880826	-0.00766116	0.0201515	0.0188635	0.00464528	0.0121689	0.0120356	0.000942146	-0.00888063	-0.00590881	-0.00179845	0.0156185	0.0023304	-0.0238625	0.0234017	-0.017836	-0.00939737	-0.00686454	0.0189201	0.0205014	-0.00143102	0.00376613	0.0331642	-0.0146479	-0.011973	-0.0195878	0.0364254	-0.00966277	0.0019631	0.0303156	0.0262805	0.0457709	0.000736852	0.0003577	0.0435573	0.0170191
[truncated: 214 more columns]

## Sheet: P-value for 2D codon heatmap
P-values for shuffled datasets exceeding experimental data of 2-dimensional representation of stalling propensities with the corresponding codons located in the P- and A-sites
P\A		Codons located in the A-site
		CCC	CCT	CCA	CCG	CTC	CTT	CTA	CTG	CAC	CAT	CAA	CAG	CGC	CGT	CGA	CGG	TCC	TCT	TCA	TCG	TTC	TTT	TTA	TTG	TAC	TAT	TAA	TAG	TGC	TGT	TGA	TGG	ACC	ACT	ACA	ACG	ATC	ATT	ATA	ATG	AAC	AAT	AAA	AAG	AGC	AGT	AGA	AGG
P	CCC	0	0	0	0.000996016	0.870518	0.996016	0.903386	0.605578	0.675299	0.781873	0.778884	0.706175	0.59761	0.868526	0.391434	0.75498	0.912351	0.248008	0.209163	0.252988	0.916335	0.311753	0.767928	0.99502	0.649402	0.434263	0.992032	0.479084	0.905378	0.626494	1	0.192231	0.361554	0.530876	0.619522	0.629482	0.194223	0.695219	0.456175	0.394422	0.0866534	0.594622	0.557769	0.130478	0.623506	0.00398406	0.0129482	0.0478088
P	CCT	0	0	0	0	0.267928	0.855578	0.99502	0.731076	0.356574	0.249004	0.168327	0.978088	0.460159	0.289841	0.0517928	0.85259	0.628486	0.803785	0.556773	0.818725	0.951195	0.948207	0.441235	0.128486	0.966135	0.75	0	0.802789	0.776892	0.667331	0.0926295	0.75498	0.320717	0.593625	0.0527888	0.0119522	0.910359	0.768924	0.0936255	0.173307	0.223108	0.659363	0.958167	0.0209163	0.965139	0.921315	0.0368526	0.908367
P	CCA	0	0	0.000996016	0	0.409363	0.901394	0.991036	0.395418	0.755976	0.655378	0.246016	0.689243	0.891434	0.955179	0.244024	0.908367	0.97012	0.388446	0.744024	0.389442	0.313745	0.742032	0.757968	0.660359	0.942231	0.940239	0.381474	0.00796813	0.919323	0.650398	0.193227	0.374502	0.966135	0.320717	0.482072	0.375498	0.864542	0.896414	0.539841	0.289841	0.426295	0.889442	0.88745	0.379482	0.770916	0.913347	0.438247	0.457171
P	CCG	0	0	0	0.000996016	0.992032	0.989044	1	0.606574	0.999004	0.743028	0.271912	0.994024	0.905378	0.651394	0.630478	0.886454	0.489044	0.322709	0.801793	0.812749	0.748008	0.73506	0.778884	0.4751	0.208167	0.984064	0.111554	0	0.803785	0.838645	0.000996016	0.49004	0.193227	0.673307	0.435259	0.351594	0.611554	0.557769	0.511952	0.580677	0.101594	0.994024	0.831673	0.273904	0.925299	0.550797	0.188247	0.706175
L	CTC	0.0488048	0.125498	0.696215	0.263944	0.639442	0.839641	0.242032	0.0737052	0.901394	0.894422	0.252988	0.755976	0.256972	0.151394	0	0.0179283	0.682271	0.609562	0.947211	0.311753	0.922311	0.565737	0.810757	0.826693	0.728088	0.972112	0.0119522	0.0517928	0.806773	0.90239	0.00896414	0.0488048	0.462151	0.40239	0.248008	0.0328685	0.672311	0.177291	0.00199203	0.885458	0.361554	0.151394	0.0119522	0	0.823705	0.785857	0.938247	0
L	CTT	0.304781	0.707171	0.61753	0.0169323	0.801793	0.760956	0.993028	0.915339	0.37749	0.890438	0.600598	0.351594	0.888446	0.246016	0.0268924	0.35757	0.680279	0.062749	0.60757	0.886454	0.90239	0.479084	0.85757	0.665339	0.394422	0.581673	0.649402	0.889442	0.550797	0.992032	0.0577689	0.0816733	0.935259	0.557769	0.25498	0.891434	0.737052	0.0507968	0.219124	0.953187	0.134462	0.532869	0.00199203	0.123506	0.571713	0.24502	0.644422	0.0398406
L	CTA	0.736056	0.110558	0.653386	0.278884	0.784861	0.391434	0.380478	0.0747012	0.978088	0.928287	0.530876	0.217131	0.997012	0.850598	0.00199203	0.603586	0.846614	0.307769	0.594622	0.989044	0.784861	0.804781	0.443227	0.798805	0.518924	0.228088	0.478088	0.120518	0.727092	0.430279	0.88247	0.224104	0.10259	0.571713	0.0059761	0.717131	0.263944	0.522908	0.218127	0.544821	0.772908	0.813745	0.0169323	0.00398406	0.518924	0.871514	0.38745	0.0468127
L	CTG	0.454183	0.341633	0.517928	0.0786853	0.399402	0.483068	0.573705	0.00996016	0.571713	0.315737	0.188247	0.486056	0.0288845	0.619522	0	0.0129482	0.555777	0.364542	0.890438	0.204183	0.771912	0.691235	0.649402	0.916335	0.992032	0.548805	0.0448207	0.000996016	0.931275	0.49502	0	0.0298805	0.629482	0.589641	0.255976	0.833665	0.936255	0.0667331	0.00298805	0.536853	0.217131	0.808765	0.0418327	0.0149402	0.899402	0.799801	0.513944	0.0169323
H	CAC	0	0.0059761	0	0.0737052	0.710159	0.261952	0.0119522	0.75	0.87749	0.312749	0.157371	0.370518	0.0229084	0.140438	0	0.0209163	0.161355	0.946215	0.340637	0.781873	0.762948	0.692231	0.483068	0.296813	0.839641	0.442231	0.000996016	0.0149402	0.821713	0.296813	0	0.000996016	0.961155	0.568725	0.0059761	0.00298805	0.310757	0.340637	0	0.756972	0.0398406	0.442231	0	0	0.231076	0.0169323	0	0
H	CAT	0.811753	0.292829	0.113546	0.50996	0.471116	0.946215	0.75	0.149402	0.726096	0.581673	0.394422	0.595618	0.634462	0.0737052	0	0	0.623506	0.943227	0.948207	0.268924	0.914343	0.729084	0.419323	0.50498	0.771912	0.98008	0.000996016	0.00199203	0.86753	0.608566	0	0.00896414	0.746016	0.677291	0.498008	0.389442	0.63247	0.605578	0.140438	0.770916	0.200199	0.26494	0	0	0.271912	0.838645	0	0
Q	CAA	0.486056	0.72012	0.344622	0.943227	0.581673	0.89243	0.697211	0.766932	0.728088	0.687251	0.859562	0.946215	0.49004	0.489044	0.0159363	0.0517928	0.170319	0.400398	0.61753	0.0796813	0.307769	0.449203	0.434263	0.935259	0.802789	0.326693	0.0737052	0	0.559761	0.678287	0.0418327	0.378486	0.290837	0.62749	0.285857	0.614542	0.537849	0.396414	0.262948	0.314741	0.188247	0.722112	0.0796813	0.298805	0.709163	0.556773	0	0.0229084
Q	CAG	0.572709	0.994024	0.314741	0.696215	0.697211	0.446215	0.815737	0.73506	0.954183	0.925299	0.693227	0.788845	0.190239	0.197211	0.0468127	0.320717	0.380478	0.884462	0.143426	0.683267	0.984064	0.913347	0.996016	0.784861	0.949203	0.886454	0.0149402	0.000996016	0.682271	0.785857	0.0119522	0.0328685	0.682271	0.562749	0.89243	0.547809	0.689243	0.574701	0.443227	0.492032	0.587649	0.563745	0.0229084	0.214143	0.973108	0.00398406	0.0219124	0.140438
R	CGC	0.433267	0.811753	0.981076	0.72012	0.569721	0.233068	0.84761	0.738048	0.963147	0.633466	0.286853	0.839641	0.106574	0.826693	0.00398406	0.299801	0.706175	0.460159	0.974104	0.308765	0.537849	0.813745	0.816733	0.719124	0.996016	1	0.373506	0.139442	0.946215	0.996016	0.00996016	0.0119522	0.733068	0.515936	0.450199	0.937251	0.786853	0.984064	0.792829	0.482072	0.972112	0.441235	0.384462	0.00199203	0.947211	0.641434	0.628486	0.0657371
R	CGT	0.880478	0.344622	0.649402	0.73008	0.871514	0.719124	0.0657371	0.348606	0.838645	0.876494	0.468127	0.287849	0.334661	0.246016	0.930279	0.762948	0.997012	0.63745	0.884462	0.85757	0.923307	0.224104	0.843625	0.969124	0.40239	0.336653	0.920319	0.465139	0.432271	0.255976	0.0408367	0.706175	0.688247	0.591633	0.0527888	0.680279	0.613546	0.246016	0.492032	0.987052	0.702191	0.476096	0.666335	0.63745	0.181275	0.304781	0.0537849	0.262948
R	CGA	0.0468127	0.0796813	0.317729	0.853586	0.87749	0.700199	0.981076	0.625498	0.443227	0.973108	0.263944	0.905378	0.656375	0.691235	0.322709	0.0657371	0.528884	0.749004	0.855578	0.416335	0.23506	0.923307	0.844622	0.298805	0.680279	0.141434	0.945219	0.639442	0.734064	0.554781	0.780876	0.579681	0.621514	0.165339	0.999004	0.596614	0.293825	0.86255	0.24502	0.308765	0.658367	0.919323	0.168327	0	0.487052	0.99004	0	0.0258964
R	CGG	0.120518	0.564741	0.308765	0.831673	0.868526	0.953187	0.576693	0.207171	0.87749	0.958167	0.61753	0.959163	0.780876	0.48008	0.114542	0.180279	0.890438	0.331673	0.478088	0.416335	0.916335	0.866534	0.796813	0.613546	0.728088	0.287849	0.60757	0.998008	0.839641	0.838645	0.973108	0.657371	0.609562	0.86753	0.888446	0.87749	0.827689	0.38247	0.89243	0.795817	0.97012	0.999004	0.460159	0.00796813	0.589641	0.920319	0.304781	0.168327
S	TCC	0.4751	0.23008	0.214143	0.718127	0.418327	0.0368526	0.684263	0.638446	0.665339	0.349602	0.589641	0.52988	0.417331	0.134462	0.659363	0.429283	0.773904	0.925299	0.703187	0.694223	0.976096	0.746016	0.808765	0.623506	0.416335	0.223108	0.791833	0.0288845	0.218127	0.907371	0.0189243	0.487052	0.812749	0.916335	0.751992	0.241036	0.400398	0.770916	0.578685	0.800797	0.284861	0.190239	0.218127	0.121514	0.751992	0.121514	0.432271	0.336653
S	TCT	0.795817	0.326693	0.131474	0.343625	0.532869	0.497012	0.104582	0.698207	0.638446	0.790837	0.619522	0.467131	0.530876	0.619522	0.0059761	0.51494	0.738048	0.285857	0.317729	0.923307	0.878486	0.441235	0.896414	0.410359	0.682271	0.650398	0.336653	0.151394	0.409363	0.408367	0.398406	0.22012	0.925299	0.0946215	0.38745	0.0348606	0.907371	0.574701	0.711155	0.497012	0.23008	0.00298805	0.261952	0.0478088	0.368526	0.853586	0.522908	0.121514
S	TCA	0.586653	0.309761	0.0826693	0.972112	0.726096	0.823705	0.987052	0.810757	0.483068	0.981076	0.205179	0.146414	0.893426	0.836653	0.0209163	0.284861	0.796813	0.948207	0.98008	0.99004	0.994024	0.526892	0.683267	0.785857	0.641434	0.62749	0.0428287	0.0229084	0.414343	0.502988	0.0109562	0.0109562	0.438247	0.727092	0.371514	0.700199	0.0567729	0.961155	0.891434	0.671315	0.38247	0.355578	0.241036	0.576693	0.937251	0.441235	0.52988	0.0109562
S	TCG	0.140438	0.185259	0.604582	0.51992	0.885458	0.594622	0.959163	0.778884	0.861554	0.660359	0.920319	0.692231	0.459163	0.937251	0.536853	0.732072	0.964143	0.36255	0.120518	0.870518	0.297809	0.638446	0.416335	0.987052	0.825697	0.559761	0.992032	0	0.324701	0.912351	0.967131	0.0318725	0.24502	0.836653	0.959163	0.0557769	0.653386	0.444223	0.405378	0.438247	0.536853	0.928287	0.837649	0.482072	0.678287	0.496016	0.0966135	0.00398406
F	TTC	0.15239	0	0.0298805	0.920319	0.786853	0.0677291	0.963147	0.929283	0.124502	0.667331	0.154382	0.26494	0.00199203	0.00398406	0	0.00298805	0.161355	0.184263	0.99004	0.0458167	0.654382	0.770916	0.299801	0.0169323	0.441235	0.26992	0.849602	0.00498008	0.38745	0.804781	0.000996016	0.0149402	0.433267	0.811753	0.420319	0.939243	0.322709	0.35757	0.13247	0.772908	0.199203	0.410359	0.0806773	0.061753	0.694223	0.512948	0.263944	0.0199203
F	TTT	0.0986056	0.226096	0.196215	0.791833	0.746016	0.113546	0.328685	0.64243	0.409363	0.265936	0.824701	0.654382	0.670319	0.331673	0.0298805	0.128486	0.65239	0.319721	0.256972	0.380478	0.282869	0.676295	0.631474	0.0976096	0.77988	0.543825	0.134462	0.0368526	0.893426	0.375498	0	0.0448207	0.628486	0.246016	0.281873	0.778884	0.528884	0.958167	0.219124	0.790837	0.733068	0.0388446	0.670319	0.0159363	0.921315	0.584661	0.0906375	0.442231
L	TTA	0.51494	0.482072	0.853586	0.468127	0.443227	0.61753	0.146414	0.569721	0.261952	0.646414	0.15239	0.360558	0.74502	0.195219	0.0488048	0.0258964	0.151394	0.840637	0.388446	0.337649	0.962151	0.565737	0.364542	0.5249	0.75	0.998008	0.598606	0.304781	0.940239	0.656375	0.0537849	0.186255	0.487052	0.452191	0.313745	0.219124	0.469124	0.268924	0.2749	0.688247	0.446215	0.294821	0.0159363	0.00697211	0.99004	0.305777	0.061753	0
L	TTG	0.182271	0.343625	0.304781	0.669323	0.498008	0.812749	0.890438	0.7749	0.801793	0.356574	0.161355	0.358566	0.87251	0.50996	0.00498008	0.288845	0.783865	0.614542	0.431275	0.356574	0.683267	0.525896	0.987052	0.187251	0.919323	0.276892	0.130478	0.000996016	0.0826693	0.620518	0.0308765	0.0717131	0.838645	0.760956	0.695219	0.389442	0.315737	0.49502	0.566733	0.481076	0.685259	0.668327	0.681275	0.00398406	0.12251	0.0796813	0.148406	0.166335
Y	TAC	0.0219124	0.0976096	0.0189243	0.201195	0.920319	0.669323	0.00996016	0.346614	0.541833	0.690239	0.961155	0.00199203	0.974104	0.604582	0	0.061753	0.396414	0.582669	0.236056	0.431275	0.917331	0.518924	0.153386	0.00996016	0.512948	0.290837	0.0129482	0.00498008	0.832669	0.344622	0	0.00199203	0.619522	0.568725	0.959163	0.605578	0.125498	0.460159	0.181275	0.890438	0.650398	0.128486	0	0.000996016	0.660359	0.568725	0	0.00199203
Y	TAT	0.0856574	0.214143	0.0149402	0.12749	0.412351	0.904382	0.733068	0.861554	0.249004	0.756972	0.219124	0.728088	0.348606	0.34761	0.203187	0.0966135	0.496016	0.609562	0.713147	0.253984	0.0707171	0.218127	0.310757	0.374502	0.454183	0.763944	0.120518	0.0179283	0.861554	0.0687251	0	0.000996016	0.654382	0.898406	0.130478	0.390438	0.283865	0.680279	0.251992	0.644422	0.447211	0.186255	0.10757	0.000996016	0.121514	0.266932	0.00697211	0
*	TAA	N/A	N/A	N/A	N/A	N/A	N/A	N/A	N/A	N/A	N/A	N/A	N/A	N/A	N/A	N/A	N/A	N/A	N/A	N/A	N/A	N/A	N/A	N/A	N/A	N/A	N/A	N/A	N/A	N/A	N/A	N/A	N/A	N/A	N/A	N/A	N/A	N/A	N/A	N/A	N/A	N/A	N/A	N/A	N/A	N/A	N/A	N/A	N/A
*	TAG	N/A	N/A	N/A	N/A	N/A	N/A	N/A	N/A	N/A	N/A	N/A	N/A	N/A	N/A	N/A	N/A	N/A	N/A	N/A	N/A	N/A	N/A	N/A	N/A	N/A	N/A	N/A	N/A	N/A	N/A	N/A	N/A	N/A	N/A	N/A	N/A	N/A	N/A	N/A	N/A	N/A	N/A	N/A	N/A	N/A	N/A	N/A	N/A
C	TGC	0.88745	0.751992	0.685259	0.566733	0.817729	0.935259	0.51494	0.346614	0.838645	0.135458	0.947211	0.390438	0.942231	0.888446	0.36255	0.629482	0.714143	0.154382	0.679283	0.538845	0.843625	0.693227	0.894422	0.649402	0.999004	0.506972	0.0149402	0.206175	0.88745	0.484064	0.202191	0.297809	0.623506	0.886454	0.40239	0.821713	0.860558	0.350598	0.718127	0.575697	0.155378	0.465139	0.0348606	0.0338645	0.457171	0.409363	0.0129482	0.2749
C	TGT	0.982072	0.954183	0.786853	0.338645	0.573705	0.12749	0.349602	0.794821	0.729084	0.888446	0.732072	0.716135	0.802789	0.929283	0.296813	0.226096	0.353586	0.891434	0.744024	0.685259	0.620518	0.928287	0.988048	0.802789	0.726096	0.920319	0.626494	0.00199203	0.165339	0.369522	0.348606	0.708167	0.712151	0.59761	0.411355	0.988048	0.489044	0.657371	0.918327	0.333665	0.799801	0.215139	0.223108	0.903386	0.893426	0.682271	0.063745	0.0786853
*	TGA	N/A	N/A	N/A	N/A	N/A	N/A	N/A	N/A	N/A	N/A	N/A	N/A	N/A	N/A	N/A	N/A	N/A	N/A	N/A	N/A	N/A	N/A	N/A	N/A	N/A	N/A	N/A	N/A	N/A	N/A	N/A	N/A	N/A	N/A	N/A	N/A	N/A	N/A	N/A	N/A	N/A	N/A	N/A	N/A	N/A	N/A	N/A	N/A
W	TGG	0.788845	0.313745	0.747012	0.907371	0.84761	0.463147	0.858566	0.685259	0.953187	0.676295	0.692231	0.669323	0.366534	0.0956175	0	0.207171	0.349602	0.543825	0.729084	0.302789	0.624502	0.598606	0.677291	0.945219	0.539841	0.635458	0.478088	0	0.920319	0.639442	0.0328685	0.337649	0.729084	0.74004	0.666335	0.158367	0.920319	0.313745	0.620518	0.976096	0.0547809	0.211155	0.689243	0	0.496016	0.0816733	0.294821	0.0109562
T	ACC	0.655378	0.703187	0.153386	0.823705	0.158367	0.981076	0.959163	0.878486	0.49502	0.788845	0.498008	0.958167	0.778884	0.396414	0.217131	0.522908	0.189243	0.961155	0.85757	0.86753	0.558765	0.565737	0.434263	0.515936	0.103586	0.84761	0.258964	0.00199203	0.85757	0.491036	0.12749	0.608566	1	0.364542	0.944223	0.860558	0.478088	0.698207	0.810757	0.926295	0.488048	0.0577689	0.587649	0.0159363	0.888446	0.0059761	0.0298805	0.0796813
T	ACT	0.929283	0.133466	0.665339	0.99502	0.9751	0.845618	0.555777	1	0.610558	0.831673	0.962151	0.63745	0.778884	0.489044	0.258964	0.967131	0.903386	0.98008	0.85259	0.844622	0.625498	0.792829	0.403386	0.671315	0.823705	0.527888	0.265936	0.561753	0.424303	0.932271	0.0179283	0.0657371	0.634462	0.805777	0.845618	0.25996	0.198207	0.813745	0.946215	0.962151	0.87749	0.570717	0.333665	0.334661	0.618526	0.365538	0.0358566	0.0169323
T	ACA	0.865538	0.812749	0.953187	0.499004	0.541833	0.171315	0.39741	0.966135	0.329681	0.819721	0.410359	0.434263	0.319721	0.99502	0.00996016	0.828685	0.873506	0.733068	0.979084	0.618526	0.75	0.574701	0.550797	0.502988	0.86255	0.388446	0.00298805	0.00398406	0.341633	0.23506	0.174303	0.636454	0.384462	0.36255	0.949203	0.304781	0.661355	0.655378	0.556773	0.803785	0.546813	0.517928	0.788845	0.873506	0.36753	0.5249	0.478088	0.63247
T	ACG	0.809761	0.760956	0.762948	0.978088	0.981076	0.702191	0.172311	0.424303	0.555777	0.0278884	0.363546	0.85757	0.412351	0.555777	0.760956	0.921315	0.530876	0.98008	0.151394	0.557769	0.854582	0.600598	0.655378	0.595618	0.999004	0.699203	0.146414	0.219124	0.756972	0.63745	0.0219124	0.320717	0.837649	0.714143	0.533865	0.371514	0.896414	0.62251	0.23506	0.65239	0.158367	0.476096	0.399402	0.386454	0.0577689	0.0249004	0.522908	0.261952
I	ATC	0.492032	0.00896414	0	0.287849	0.856574	0.949203	0.0707171	0.943227	0.753984	0.326693	0.651394	0.788845	0.0976096	0.47012	0	0.413347	0.624502	0.908367	0.994024	0.648406	0.218127	0.879482	0.738048	0.950199	0.77988	0.702191	0.0438247	0.0308765	0.11255	0.386454	0.000996016	0.202191	0.961155	0.88247	0.129482	0.991036	0.376494	0.181275	0.304781	0.680279	0.428287	0.00199203	0.120518	0.957171	0.333665	0.12749	0.763944	0.547809
I	ATT	0.310757	0.520916	0.0149402	0.791833	0.750996	0.89741	0.927291	0.965139	0.951195	0.532869	0.499004	0.929283	0.219124	0.822709	0.0507968	0.542829	0.723108	0.955179	0.476096	0.854582	0.541833	0.528884	0.578685	0.74004	0.349602	0.649402	0.494024	0.776892	0.702191	0.11255	0.577689	0.539841	0.905378	0.250996	0.60259	0.64243	0.859562	0.427291	0.734064	0.87749	0.450199	0.693227	0.0418327	0.271912	0.0667331	0.957171	0.210159	0.232072
I	ATA	0.403386	0.896414	0.110558	0.192231	0.479084	0.665339	0.683267	0.483068	0.793825	0.929283	0.414343	0.231076	0.688247	0.428287	0.0517928	0.768924	0.134462	0.614542	0.643426	0.748008	0.911355	0.783865	0.266932	0.580677	0.693227	0.963147	0.327689	0	0.611554	0.789841	0.00199203	0.202191	0.494024	0.909363	0.921315	0.0458167	0.488048	0.390438	0.500996	0.349602	0.881474	0.278884	0.129482	0.154382	0.916335	0.100598	0.10259	0.0308765
M	ATG	0.988048	0.64741	0.0448207	0.25996	0.795817	0.200199	0.483068	0.421315	0.501992	0.522908	0.644422	0.319721	0.0547809	0.706175	0.00996016	0.0946215	0.97012	0.294821	0.831673	0.390438	0.322709	0.287849	0.760956	0.23506	0.98506	0.777888	0.000996016	0.0866534	0.476096	0.638446	0.2749	0.446215	0.285857	0.0936255	0.640438	0.604582	0.35259	0.445219	0.471116	0.161355	0.881474	0.790837	0.62251	0.185259	0.667331	0.00498008	0.227092	0.0567729
N	AAC	0.062749	0.288845	0.0537849	0.711155	0.653386	0.861554	0.606574	0.00996016	0.878486	0.560757	0.526892	0.87749	0.649402	0.825697	0.0378486	0.86753	0.76494	0.946215	0.420319	0.182271	0.748008	0.829681	0.653386	0.596614	0.849602	0.886454	0	0.00398406	0.643426	0.830677	0.13745	0.0886454	0.394422	0.358566	0.831673	0.324701	0.213147	0.302789	0.539841	0.791833	0.717131	0.109562	0.00896414	0.0448207	0.605578	0.493028	0.0189243	0.0169323
N	AAT	0.924303	0.376494	0.553785	0.885458	0.360558	0.209163	0.763944	0.537849	0.948207	0.462151	0.75498	0.731076	0.442231	0.793825	0.276892	0.86255	0.712151	0.628486	0.896414	0.833665	0.964143	0.63247	0.879482	0.875498	0.904382	0.210159	0.000996016	0.00199203	0.814741	0.0806773	0.00199203	0.608566	0.73008	0.290837	0.0657371	0.177291	0.511952	0.312749	0.954183	0.734064	0.348606	0.476096	0.0966135	0.0946215	0.287849	0.918327	0.0766932	0.0388446
K	AAA	0.0498008	0.90239	0.576693	0.655378	0.446215	0.23008	0.894422	0.277888	0.758964	0.545817	0.829681	0.771912	0.831673	0.257968	0.248008	0.0956175	0.797809	0.762948	0.371514	0.89243	0.564741	0.330677	0.900398	0.751992	0.734064	0.742032	0.170319	0.894422	0.905378	0.25498	0.462151	0.468127	0.690239	0.448207	0.726096	0.0577689	0.216135	0.131474	0.858566	0.871514	0.987052	0.39243	0.697211	0.35259	0.75498	0.566733	0.819721	0.474104
K	AAG	0.461155	0.523904	0.691235	0.822709	0.568725	0.777888	0.885458	0.581673	0.809761	0.967131	0.638446	0.796813	0.295817	0.651394	0.699203	0.940239	0.467131	0.429283	0.747012	0.63745	0.978088	0.462151	0.476096	0.778884	0.60259	0.844622	0.483068	0.0786853	0.00697211	0.801793	0.694223	0.151394	0.0976096	0.325697	0.549801	1	0.925299	0.616534	0.829681	0.421315	0.540837	0.909363	0.577689	0.609562	0.693227	0.478088	0.633466	0.27988
S	AGC	0.643426	0.443227	0.467131	0.184263	0.183267	0.843625	0.930279	0.493028	0.952191	0.933267	0.661355	0.694223	0.777888	0.546813	0.000996016	0.798805	0.90239	0.386454	0.413347	0.215139	0.953187	0.75498	0.869522	0.875498	0.386454	0.444223	0.386454	0.062749	0.913347	0.793825	0.13247	0.10259	0.534861	0.996016	0.180279	0.423307	0.686255	0.907371	0.0438247	0.433267	0.619522	0.299801	0.178287	0.00298805	0.418327	0.893426	0.0189243	0.0159363
S	AGT	0.999004	0.885458	0.685259	0.531873	0.989044	0.545817	0.689243	0.997012	0.827689	0.580677	0.585657	0.236056	0.608566	0.25498	0.133466	0.284861	0.308765	0.311753	0.419323	0.684263	0.302789	0.973108	0.326693	0.431275	0.327689	0.0288845	0.973108	0.778884	0.338645	0.363546	0.804781	0.993028	0.750996	0.476096	0.681275	0.0756972	0.609562	0.588645	0.562749	0.292829	0.780876	0.76992	0.0996016	0.22012	0.250996	0.206175	0.0468127	0.63745
R	AGA	0.856574	0.613546	0.860558	0.166335	0.488048	0.556773	0.580677	0.824701	0.919323	0.87749	0.765936	0.336653	0.709163	0.871514	0.561753	0.914343	0.969124	0.784861	0.354582	0.460159	0.64741	0.86255	0.61753	0.345618	0.717131	0.60757	0.173307	0.845618	0.710159	0.296813	0.979084	0.0747012	0.809761	0.427291	0.979084	0.14243	0.938247	0.496016	0.731076	0.965139	0.811753	0.932271	0.101594	0.566733	0.567729	0.864542	0.237052	0.340637
R	AGG	0.876494	0.531873	0.823705	0.978088	0.982072	0.911355	0.993028	0.960159	0.952191	0.318725	0.704183	0.0298805	0.105578	0.375498	0.312749	0.695219	0.858566	0.167331	0.288845	0.0059761	0.829681	0.447211	0.691235	0.691235	0.630478	0.429283	0.879482	0.64741	0.400398	0.129482	0.105578	0.898406	0.599602	0.24004	0.337649	0.694223	0.726096	0.620518	0.742032	0.845618	0.866534	0.548805	0.950199	0.00298805	0.996016	0.0468127	0.51992	0.0358566
A	GCC	0.855578	0.661355	0.422311	0.997012	0.628486	0.994024	0.971116	0.856574	0.648406	0.997012	0.858566	0.521912	0.956175	0.765936	0.00796813	0.506972	0.346614	0.993028	0.306773	0.816733	0.625498	0.939243	0.284861	0.0796813	0.301793	0.340637	0.817729	0.0119522	0.929283	0.998008	0.0139442	0.432271	0.444223	0.383466	0.98506	0.545817	0.800797	0.50498	0.790837	0.0756972	0.393426	0.103586	0.141434	0.0996016	0.931275	0.0328685	0.0189243	0.889442
A	GCT	0.431275	0.462151	0.52988	0.86255	0.983068	0.75996	0.884462	0.865538	0.231076	0.549801	0.746016	0.860558	0.399402	0.586653	0.00298805	0.228088	0.814741	0.793825	0.381474	0.326693	0.345618	0.946215	0.778884	0.714143	0.113546	0.721116	0.674303	0.613546	0.912351	0.733068	0.551793	0.244024	0.772908	0.915339	0.812749	0.659363	0.743028	0.762948	0.716135	0.921315	0.512948	0.288845	0.169323	0.00298805	0.250996	0.453187	0.0338645	0.646414
A	GCA	0.785857	0.815737	0.953187	0.636454	0.190239	0.641434	0.940239	0.994024	0.707171	0.992032	0.0727092	0.796813	0.829681	0.952191	0.332669	0.472112	0.629482	0.790837	0.87251	0.968127	0.844622	0.871514	0.922311	0.750996	0.949203	0.883466	0.823705	0.448207	0.752988	0.0766932	0.74502	0.932271	0.586653	0.680279	0.364542	0.247012	0.908367	0.486056	0.0756972	0.451195	0.276892	0.63745	0.213147	0.23506	0.559761	0.172311	0.411355	0.75
A	GCG	0.708167	0.0727092	0.449203	0.973108	0.983068	0.841633	0.746016	0.912351	0.931275	0.591633	0.915339	0.98008	0.187251	0.212151	0.0239044	0.351594	0.797809	0.134462	0.89741	0.922311	0.927291	0.246016	0.686255	0.837649	0.834661	0.061753	1	0.477092	0.987052	0.913347	0.325697	0.719124	0.996016	0.510956	0.963147	0.766932	0.332669	0.950199	0.163347	0.59761	0.363546	0.14741	0.373506	0.366534	0.558765	0.733068	0.0537849	0.2251
V	GTC	0.351594	0.75	0.493028	0.195219	0.770916	0.908367	0.787849	0.517928	0.734064	0.956175	0.918327	0.0219124	0.90239	0.977092	0.00298805	0.364542	0.328685	0.846614	0.889442	0.669323	0.744024	0.934263	0.751992	0.424303	0.580677	0.97012	0.996016	0.00498008	0.813745	0.484064	0	0.559761	0.191235	0.744024	0.966135	0.728088	0.967131	0.574701	0.566733	0.802789	0.863546	0.668327	0.654382	0.788845	0.98506	0.136454	0.0189243	0.65239
V	GTT	0.523904	0.479084	0.830677	0.38745	0.864542	0.483068	0.973108	0.976096	0.667331	0.63745	0.770916	0.701195	0.717131	0.419323	0.213147	0.569721	0.590637	0.0318725	0.415339	0.199203	0.875498	0.793825	0.63247	0.212151	0.488048	0.434263	0.239044	0.72012	0.74502	0.491036	0.0209163	0.0189243	0.934263	0.805777	0.812749	0.161355	0.783865	0.805777	0.059761	0.906375	0.349602	0.0239044	0.861554	0.063745	0.613546	0.615538	0.494024	0.753984
V	GTA	0.685259	0.448207	0.321713	0.88745	0.72012	0.960159	0.945219	0.539841	0.885458	0.988048	0.317729	0.282869	0.491036	0.98506	0.277888	0.648406	0.486056	0.916335	0.883466	0.773904	0.75996	0.25	0.348606	0.584661	0.710159	0.140438	0.169323	0.0687251	0.823705	0.455179	0.00498008	0.900398	0.809761	0.0577689	0.10757	0.747012	0.373506	0.501992	0.924303	0.454183	0.320717	0.453187	0.276892	0.920319	0.399402	0.380478	0	0.459163
V	GTG	0.0946215	0.859562	0.866534	0.364542	0.483068	0.981076	0.76494	0.808765	0.947211	0.574701	0.302789	0.98008	0.374502	0.268924	0.0209163	0.788845	0.833665	0.955179	0.415339	0.103586	0.699203	0.722112	0.272908	0.0378486	0.939243	0.502988	0.846614	0.00697211	0.63745	0.416335	0.143426	0.249004	0.809761	0.125498	0.711155	0.523904	0.742032	0.731076	0.0129482	0.39243	0.670319	0.74004	0.00398406	0.193227	0.865538	0.252988	0.450199	0.89741
D	GAC	0.10757	0.25	0.194223	0.462151	0.938247	0.719124	0.659363	0.478088	0.533865	0.153386	0.311753	0.00996016	0.893426	0.521912	0.000996016	0.294821	0.630478	0.955179	0.949203	0.705179	0.366534	0.829681	0.639442	0.689243	0.618526	0.792829	0.0129482	0.0059761	0.472112	0.442231	0.00996016	0.125498	0.601594	0.0498008	0.0199203	0.302789	0.2251	0.501992	0.936255	0.196215	0.173307	0.213147	0.290837	0.00199203	0.476096	0.119522	0.0328685	0.893426
D	GAT	0.292829	0.26494	0.366534	0.439243	0.758964	0.419323	0.943227	0.982072	0.813745	0.828685	0.74502	0.195219	0.10757	0.10259	0.667331	0.435259	0.0956175	0.783865	0.0258964	0.966135	0.810757	0.440239	0.968127	0.648406	0.0667331	0.196215	0.00896414	0.360558	0.696215	0.138446	0	0.00199203	0.499004	0.950199	0.386454	0.413347	0.640438	0.61255	0.176295	0.523904	0.609562	0.997012	0.271912	0.354582	0.461155	0.415339	0.0219124	0.74004
E	GAA	0.636454	0.674303	0.0766932	0.286853	0.899402	0.65239	0.550797	0.60259	0.424303	0.799801	0.822709	0.434263	0.171315	0.552789	0.450199	0.251992	0.263944	0.850598	0.298805	0.633466	0.74004	0.988048	0.930279	0.656375	0.785857	0.673307	0.226096	0.550797	0.179283	0.631474	0.339641	0.156375	0.289841	0.324701	0.228088	0.427291	0.636454	0.696215	0.146414	0.277888	0.563745	0.850598	0.304781	0.492032	0.181275	0.0547809	0.399402	0.25498
E	GAG	0.303785	0.99502	0.272908	0.0229084	0.656375	0.270916	0.24004	0.864542	0.836653	0.389442	0.700199	0.946215	0.640438	0.953187	0.120518	0.919323	0.879482	0.631474	0.961155	0.883466	0.937251	0.227092	0.411355	0.305777	0.911355	0.843625	0.136454	0.00498008	0.170319	0.615538	0.638446	0.116534	0.121514	0.694223	0.290837	0.0796813	0.694223	0.940239	0.438247	0.806773	0.313745	0.139442	0.951195	0.0547809	0.467131	0.863546	0.0587649	0.283865
G	GGC	0.282869	0.2749	0.210159	0.0747012	0.978088	0.825697	0.921315	0.86753	0.958167	0.307769	0.936255	0.455179	0.75996	0.728088	0	0.273904	0.348606	0.704183	0.477092	0.423307	0.575697	0.997012	0.984064	0.39243	0.618526	0.455179	0.0129482	0.0328685	0.2749	0.182271	0.198207	0.00199203	0.340637	0.968127	0.731076	0.986056	0.537849	0.949203	0.404382	0.748008	0.168327	0.585657	0.323705	0.059761	0.209163	0.888446	0.173307	0.0189243
G	GGT	0.478088	0.179283	0.0298805	0.578685	0.848606	0.695219	0.968127	0.716135	0.616534	0.673307	0.625498	0.646414	0.614542	0.26494	0.0507968	0.171315	0.973108	0.687251	0.756972	0.573705	0.670319	0.583665	0.532869	0.330677	0.870518	0.568725	0.923307	0	0.62749	0.350598	0.0159363	0.26494	0.349602	0.758964	0.988048	0.73506	0.226096	0.589641	0.23506	0.656375	0.598606	0.328685	0.10757	0.0328685	0.511952	0.0388446	0.26992	0.188247
G	GGA	0.899402	0.752988	0.820717	0.526892	0.777888	0.965139	0.963147	0.963147	0.649402	0.743028	0.955179	0.531873	0.784861	0.988048	0.0557769	0.260956	0.424303	0.668327	0.398406	0.925299	0.408367	0.385458	0.501992	0.741036	0.37251	0.643426	0.868526	0.00199203	0.413347	0.356574	0.00199203	0.229084	0.831673	0.987052	0.531873	0.427291	0.958167	0.467131	0.659363	0.721116	0.797809	0.534861	0	0.710159	0.822709	0.133466	0	0.223108
G	GGG	0.0488048	0.368526	0.191235	0.677291	0.873506	0.832669	0.064741	0.518924	0.89243	0.866534	0.891434	0.653386	0.0856574	0.850598	0.0328685	0	0.301793	0.181275	0.116534	0.50996	0.843625	0.681275	0.59761	0.12251	0.507968	0.931275	0.125498	0.89741	0.89741	0.700199	0.0896414	0.00697211	0.630478	0.449203	0.00398406	0.948207	0.910359	0.888446	0.0109562	0.821713	0.4751	0.0438247	0.0567729	0	0.533865	0.549801	0.000996016	0.0438247
[truncated: 214 more columns]

## Sheet: Aminoacid heatmap
Stop efficiency at the corresponging amino acid residue in the -2nd position while mRNA codon with specified index number is located in the P-site												Stop efficiency at the corresponging amino acid residue in the E-site while mRNA codon with specified index number is located in the P-site												Stop efficiency at the corresponging amino acid residue in the P-site while mRNA codon with specified index number is located in the P-site												Stop efficiency at the corresponging amino acid residue in the A-site while mRNA codon with specified index number is located in the P-site												Stop efficiency at the corresponging amino acid residue in the 2nd position while mRNA codon with specified index number is located in the P-site
-2	Index number of mRNA codon located in the P-site											E	Index number of mRNA codon located in the P-site											P	Index number of mRNA codon located in the P-site											A	Index number of mRNA codon located in the P-site											2	Index number of mRNA codon located in the P-site
	4	5	6	7	8	9	10	11	12	13			3	4	5	6	7	8	9	10	11	12			2	3	4	5	6	7	8	9	10	11			1	2	3	4	5	6	7	8	9	10			1
W	0.0131522	-0.000668492	0.00140888	-0.00469496	-0.00769489	-0.00228982	-0.0021029	0.0276081	-0.00411705	-0.00987847		W	0.00417844	0.00651175	0.0072948	0.00689906	0.00446426	-0.00407544	0.00369094	0.00481579	0.00659942	-0.000709186		W	-0.0143738	0.0133106	0.0117457	0.00036864	0.00766756	0.00671187	-0.00562208	0.00631574	-0.00574051	0.0579406		W	0.0157575	0.00574579	0.0272441	0.0188831	0.00629679	0.0144611	0.00587513	0.00228028	-0.00593567	0.00844929		W	-0.00320925
Y	0.0107189	-0.00362507	-0.00116314	0.00128622	-0.00345648	-0.00904162	-0.00251364	0.0437905	-0.000794451	-0.00661564		Y	0.00568742	0.0157944	0.0122871	0.01059	0.00328339	-0.00241578	-0.00508395	-0.00048672	0.0452894	-0.00243911		Y	0.00128707	0.0196803	0.0319649	0.0159675	0.0179352	0.00896218	0.000322609	-0.00321293	0.0150316	0.0879866		Y	-0.0226099	-0.0133886	-0.00592215	-0.0014464	-0.00759147	0.00387667	-0.00806698	-0.0212727	-0.0112582	-0.0095978		Y	-0.00488566
F	0.00677932	-0.00269762	-0.00142363	-0.0118762	-0.00526238	-0.00811772	-0.00395165	0.044804	0.00164504	-0.00392882		F	0.00411606	0.018787	0.015271	0.0120313	0.0120511	-0.00142116	0.00219705	-0.0022608	0.0388184	-0.00278406		F	0.00834811	0.0207058	0.02036	0.0144372	0.0101582	0.0158061	0.00217132	-0.000633035	-0.00754271	0.0661333		F	-0.000214458	-0.013302	-0.0119937	-0.00411116	-0.00322453	-0.00361625	-0.00803094	-0.00965522	-0.0123203	-0.0120347		F	0.000555676
I	0.00686573	0.00349973	0.00363746	0.0039306	0.00181049	-0.00670186	0.000596676	0.057372	-3.01877e-05	-0.00795872		I	0.00950133	0.0163084	0.00427886	0.008225	0.0103556	-0.00216115	-2.72641e-05	0.00576832	0.129578	0.0016726		I	-0.0117529	0.0037625	0.0118615	0.000383835	0.00818984	-0.00178064	-0.00444994	-0.00602268	-0.00498415	0.0337691		I	-0.0188714	-0.0155308	0.00141499	0.00933899	0.00443492	0.00553802	-0.004588	-0.00779231	-0.00435932	-0.00134534		I	-0.0175133
L	0.00357484	0.00113323	-0.000699678	0.000449026	-0.00556302	-0.00554217	-0.00366843	0.0392688	-0.00225618	-0.0092967		L	0.00520042	0.0114402	0.00489646	0.00707478	0.00420893	-0.00849493	-0.00857871	-0.00308082	0.0712404	0.000316505		L	-0.00847428	0.0107306	0.0142222	0.0102247	0.00827509	0.0033613	-0.00311283	-0.00288033	-0.003363	0.0605637		L	-0.00843619	-0.0101873	-0.00382246	-0.00295954	-0.00447875	-0.00157045	-0.00710561	-0.0117861	-0.0097778	-0.00948003		L	0.00518797
V	0.0134235	0.0120066	0.00916944	0.00935733	-0.00210346	-0.0040056	-0.00241674	0.0691753	-0.000782787	-0.00349584		V	0.0107717	0.0162781	0.0136995	0.0151419	0.00181049	-0.00190482	0.00201343	0.00253706	0.0940884	0.0100284		V	-0.00918062	0.00303816	0.00926683	0.00451018	0.00183944	6.64025e-05	-0.00843403	-0.00333134	-0.00844243	0.0182146		V	-0.00734241	-0.00761634	-0.0012575	-0.000687944	-0.00480863	-0.000713301	8.51808e-05	-0.00954001	-0.00474371	-0.00548163		V	0.003445
M	0.0105845	0.00514854	-0.000717447	0.00469756	-0.00825178	-0.0056706	-0.0112935	0.0337076	0.00392377	-0.0174318		M	0.00510025	0.0130931	0.00245347	0.00754168	-0.00233236	-0.00234662	-0.00693813	-0.0045362	0.0301555	-0.00347928		M	0.00168832	0.00390275	0.0191276	-0.00182213	0.0228809	-0.0100193	-0.00357275	-0.00176002	0.00090833	0.0538437		M	-0.00192396	-0.0224528	-0.00668888	0.00362206	-0.00319935	0.0118391	0.00301411	-0.0119316	-0.00783743	-0.0174965		M	-0.0128441
A	0.00440413	0.00478567	0.00431069	0.00373731	-0.00862929	-0.00719883	-0.00224651	0.0245952	-0.000874873	-0.00664438		A	0.00404305	0.00590991	0.00264655	0.00132288	0.00106262	-0.00800295	-0.00382624	-0.00134419	-0.00158569	-0.00693875		A	-0.00606207	0.00388382	0.00723344	0.00175544	-0.0027254	-0.00578666	-0.00910323	-0.00786914	-0.00579842	0.0172044		A	0.008356	-0.000558068	-0.000933821	0.00305679	-0.000113382	-0.0015919	-0.00130435	-0.00973923	-0.00700132	-0.00306657		A	0.000731433
T	0.00999734	0.00871867	0.007699	2.17313e-05	-0.00235172	-0.00349164	-0.0020127	0.0573185	0.00648472	-0.00378455		T	0.00339693	0.000197523	0.00501711	0.00180802	-0.00363784	-0.00535265	-0.0079823	-0.00603131	0.0291879	-0.00446683		T	-0.0109047	0.00324879	0.00396119	0.000217468	-0.000993471	0.00165338	-0.0095669	-0.00684148	-0.00642461	0.0243897		T	0.00265434	-0.00540699	0.000308112	0.00711003	0.00196949	0.00101889	-0.000487365	-0.010715	-0.0086828	-0.00200411		T	-0.00473331
S	0.00329728	0.00177381	0.00564918	0.000827054	-0.00724254	-0.00552174	-0.00240412	0.0249651	0.00398986	-0.00553539		S	0.00191076	0.00838714	-0.00212918	0.00304079	-0.00132489	-0.00779793	-0.00370204	-0.00377576	-1.00284e-05	-0.00328615		S	-0.00485302	0.00375068	0.00365944	-0.000216061	0.00426791	0.00173237	-0.00591323	-0.00759898	-0.000267622	0.0348021		S	0.0070052	-0.0062435	-9.21281e-05	0.00705573	-0.0011536	0.00170866	0.000873232	-0.0112465	-0.00780608	-0.00789693		S	-0.00381563
G	0.00778531	0.00228483	0.00724996	0.000745306	-0.00927614	-0.00643672	-0.00619375	0.0130841	-0.000798775	-0.00407449		G	0.00762324	0.00649424	0.00788079	0.00572601	0.00334031	-0.00711691	-0.00312905	0.000581005	0.00209645	0.000159821		G	-0.00528989	0.00762586	0.00847916	0.0078543	0.00448612	0.000359049	-0.00615763	-0.00402135	0.00121715	0.032979		G	0.000977818	-0.00726078	0.000166325	0.0018098	-0.00115112	-8.1502e-05	-0.00427159	-0.00722587	-0.00650599	-0.00580587		G	0.00631976
P	0.00768183	0.0012037	0.000821552	-0.00151763	-0.00565209	-0.00462619	-0.00275508	0.0249841	-0.0028941	-0.00854864		P	0.00379561	0.0021306	-0.00212904	-0.00115314	-0.00287279	-0.00886612	-0.00906818	-0.00608221	0.0237937	0.000684906		P	-0.00474709	0.0040649	0.00745247	0.00320819	0.00477036	0.00120647	-0.00350598	-0.000340754	0.00632875	0.0441151		P	0.0055484	-0.00266886	0.00877183	0.0103017	0.00993103	0.00600358	0.00338949	-0.00319886	0.00462591	0.0051946		P	0.00418766
Q	0.0043709	0.019655	0.0156602	0.0121041	-0.000525651	0.00084919	-0.00508932	0.0544595	0.0100546	-0.0109121		Q	0.00329109	0.00232268	0.00306236	-0.00405195	0.000638096	-0.0110236	-0.00284867	-0.000812538	0.0136401	-0.00586635		Q	-0.002857	0.00149899	0.0105436	0.0103643	0.00480838	-0.00198178	-0.00745481	-0.00874802	-0.00315971	0.0299893		Q	-0.0130058	-0.0110996	-0.00186068	0.00251299	-0.00255429	0.000721322	0.000886016	-0.00758258	-0.00470364	-0.00673246		Q	-0.00617585
N	0.00976304	0.00865926	0.0025821	0.00507983	-0.00895323	-0.00623495	-5.41706e-05	0.0438667	-0.000353848	-0.0100752		N	0.00799387	0.00582738	0.0062966	0.00355793	-0.00163116	-0.00209433	-0.00299832	0.00420997	0.0437981	-0.000489121		N	-0.00545313	0.00428146	0.0144602	0.0118524	0.00373119	0.00253224	-0.00157429	-0.00187408	-0.00334151	0.0445565		N	-0.0031014	-0.0117799	0.00785322	0.00983076	0.00757021	0.0114921	0.00544232	-0.00503926	-0.00616756	-0.0104487		N	-0.0036421
H	0.0198337	0.00536736	0.00255735	0.00603156	-0.00396185	0.00305954	-0.00017403	0.0591994	0.00550612	-0.0054687		H	0.0059544	0.0119667	0.0117346	0.00508237	0.0124011	-0.00729304	-0.00282983	-0.00237914	0.0167924	-0.00231494		H	0.00391451	0.0307575	0.0213117	0.0178569	0.0199231	0.00521119	-0.00554594	-0.000836912	0.00808047	0.0643793		H	-0.0120077	-0.0142304	-0.00534966	-0.00134505	-0.00284533	-0.00708413	-0.00358952	-0.00779026	-0.0124893	-0.00847865		H	-0.00994427
C	0.0158575	0.00794998	0.0110684	-0.00590575	-0.00566882	-0.00718303	-0.00520102	0.0342523	0.000228764	-0.00677583		C	0.00537117	0.00950131	0.00264564	0.001436	0.00239661	-0.00377346	-0.00707462	-0.00997283	0.0101298	-0.0044968		C	-0.00997812	-0.00221229	0.00666121	-0.00258328	0.00381993	-0.0015336	-0.0108407	-0.0043638	-0.00695074	0.0192912		C	0.00168706	-0.00660357	-0.0046972	0.0011311	-0.00365881	-0.00180487	-0.000548975	-0.0125192	-0.0106911	-0.00107063		C	0.00072748
K	0.0190703	0.00937209	0.00116316	0.0040479	-0.00345764	-0.00658486	0.000409849	0.0545445	0.00542788	-0.0101586		K	0.00703489	0.010865	0.00320492	0.00904633	-0.00756301	-0.00618888	-0.00515649	0.00147261	0.0986514	0.000321286		K	-0.0205373	0.00127069	0.00236347	0.000769457	0.00305816	0.0134525	-0.00675021	-0.00623728	-0.00169733	0.0237923		K	0.00357229	-0.0034289	0.0421973	0.0439426	0.0408178	0.0287648	0.0108612	0.0128952	0.0106361	0.00779179		K	-0.00163922
R	0.00972922	0.00463824	0.00157046	-0.000400441	-0.00850459	0.000135855	0.00228338	0.0398743	-0.00211398	-0.00613083		R	0.00907598	0.00856019	0.00363093	0.000546279	-0.0006587	-0.00403926	-0.00397511	-0.00281912	0.109398	0.00929074		R	-0.00502455	0.00126897	0.00251059	0.00150889	0.0005066	0.000326509	-0.00937013	-0.00708118	-0.0113303	0.0311659		R	0.00290014	-0.00666795	0.0179836	0.0150669	0.0123802	0.00887844	0.0062085	0.000514425	-0.00152728	0.00203387		R	0.00479908
E	0.00844606	0.00182915	0.00253875	0.00299269	-0.0083045	-0.00841541	-0.00673467	0.0277686	0.00134802	-0.00490162		E	0.00743133	0.0214801	0.00915408	0.0166903	0.00704437	-0.0052849	-0.00271269	0.0068772	0.00862427	-0.00124307		E	-0.0115141	0.00131212	0.00327844	0.00328957	0.0100921	0.00754996	-0.00814062	-0.00813238	-0.00016422	0.0184536		E	0.022903	0.00477663	0.0323262	0.0357489	0.0271092	0.0305475	0.0314349	0.00742972	0.00240332	0.00870084		E	0.0070382
D	0.0025362	-0.000356386	0.00872972	-0.00777526	-0.00533069	-0.00867377	0.000536817	0.0433496	0.00249547	-0.00134985		D	0.00488154	0.0105472	0.00578007	0.0107793	0.00660952	-0.00134371	0.00212751	0.00366756	0.00559243	-0.0042515		D	-0.00120124	0.00578429	0.0116379	0.00435273	0.010943	0.00215997	-0.000949653	-0.0058428	0.0030319	0.0405363		D	0.0136628	-0.000246233	0.0119001	0.0237639	0.0144778	0.017792	-0.001189	-0.000920058	-0.00410367	-0.00119622		D	0.00213812
*	0	0	0	0	0	0	0	0	0	0		*	0	0	0	0	0	0	0	0	0	0		*	0	0	0	0	0	0	0	0	0	0		*	0.00170236	0.000765548	0.0596211	0.0587195	0.0268417	0.0252319	0.0179351	0.0025948	0.0028727	0.0289931		*	0.0113641
[truncated: 8 more columns]

## Sheet: P-value for aminoacid heatmap
P-value for shuffled datasets exceeding experimental data of stop efficiency at the corresponging amino acid residue in the -2nd position while mRNA codon with specified index number is located in the P-site												P-value for shuffled datasets exceeding experimental data of stop efficiency at the corresponging amino acid residue in the E-site while mRNA codon with specified index number is located in the P-site												P-value for shuffled datasets exceeding experimental data of stop efficiency at the corresponging amino acid residue in the P-site while mRNA codon with specified index number is located in the P-site												P-value for shuffled datasets exceeding experimental data of stop efficiency at the corresponging amino acid residue in the A-site while mRNA codon with specified index number is located in the P-site												P-value for shuffled datasets exceeding experimental data of stop efficiency at the corresponging amino acid residue in the 2nd position while mRNA codon with specified index number is located in the P-site
-2	Index number of mRNA codon located in the P-site											E	Index number of mRNA codon located in the P-site											P	Index number of mRNA codon located in the P-site											A	Index number of mRNA codon located in the P-site											2	Index number of mRNA codon located in the P-site
	4	5	6	7	8	9	10	11	12	13			3	4	5	6	7	8	9	10	11	12			2	3	4	5	6	7	8	9	10	11			1	2	3	4	5	6	7	8	9	10			1
W	0.0268924	0.85757	0.7251	0.865538	0.74004	0.243028	0.497012	0.911355	0.866534	0.886454		W	0.670319	0.657371	0.239044	0.281873	0.247012	0.265936	0.0059761	0.0378486	1	0.615538		W	0.953187	0.0348606	0.255976	0.808765	0.23008	0.165339	0.454183	0.000996016	0.807769	0		W	0.000996016	0.0059761	0	0.0149402	0.364542	0.0219124	0.228088	0.000996016	0.658367	0.00796813		W	0.819721
Y	0.34761	0.982072	0.859562	0.469124	0.247012	0.922311	0.526892	0.0856574	0.62251	0.561753		Y	0.533865	0.0149402	0.0328685	0.106574	0.340637	0.165339	0.555777	0.320717	0.0557769	0.780876		Y	0.0956175	0	0	0.0139442	0.00498008	0.100598	0.0338645	0.374502	0	0		Y	1	0.957171	0.99502	0.973108	0.988048	0.52988	0.921315	1	0.968127	0.964143		Y	0.917331
F	0	0.939243	0.885458	0.99502	0.417331	0.920319	0.661355	0.064741	0.328685	0.174303		F	0	0.00298805	0.00398406	0.0288845	0.00996016	0.0846614	0.0199203	0.502988	0.321713	0.838645		F	0	0	0.00199203	0.00498008	0.0926295	0.00398406	0.0159363	0.101594	0.927291	0		F	0.643426	0.953187	1	0.998008	0.953187	0.934263	0.931275	0.828685	0.993028	0.998008		F	0.541833
I	0.692231	0.534861	0.515936	0.263944	0	0.85259	0.177291	0	0.500996	0.733068		I	0.108566	0.0169323	0.484064	0.134462	0.0308765	0.10259	0.0358566	0.0189243	0	0.35259		I	0.958167	0.712151	0.210159	0.84761	0.154382	0.731076	0.256972	0.690239	0.771912	0.663347		I	1	0.988048	0.891434	0.422311	0.491036	0.381474	0.905378	0.691235	0.49502	0.394422		I	1
L	0.898406	0.932271	0.976096	0.62749	0.399402	0.810757	0.770916	0.0687251	0.916335	0.993028		L	0.275896	0.0537849	0.395418	0.123506	0.106574	0.943227	0.997012	0.701195	0	0.483068		L	0.917331	0.00796813	0.0059761	0.00199203	0.0398406	0.186255	0.0328685	0.138446	0.73506	0		L	1	0.952191	1	1	1	0.992032	0.998008	1	0.998008	1		L	0.0517928
V	0.0378486	0	0.0328685	0.00298805	0.0189243	0.405378	0.571713	0	0.674303	0.0249004		V	0.0298805	0	0	0	0.421315	0.00896414	0	0.0119522	0	0		V	0.869522	0.896414	0.34761	0.464143	0.788845	0.616534	0.848606	0.25	0.999004	1		V	0.998008	0.746016	0.997012	0.999004	1	0.942231	0.610558	0.955179	0.550797	0.943227		V	0.182271
M	0.369522	0.408367	0.76494	0.290837	0.721116	0.600598	0.963147	0.578685	0.281873	0.994024		M	0.555777	0.242032	0.63247	0.312749	0.656375	0.221116	0.718127	0.629482	0.729084	0.728088		M	0.135458	0.630478	0.0258964	0.816733	0.000996016	0.931275	0.297809	0.309761	0.280876	0.0328685		M	0.670319	0.994024	0.99502	0.763944	0.884462	0.174303	0.394422	0.851594	0.743028	0.996016		M	0.974104
A	0.983068	0.405378	0.455179	0.113546	0.984064	0.991036	0.537849	1	0.784861	0.595618		A	0.86753	0.906375	0.811753	0.910359	0.461155	0.914343	0.295817	0.278884	1	1		A	0.513944	0.871514	0.739044	0.900398	1	0.997012	0.989044	0.99502	0.991036	1		A	0.00298805	0.0059761	1	0.994024	0.988048	0.997012	0.848606	0.996016	0.98506	0.685259		A	0.567729
T	0.308765	0.0517928	0.0816733	0.644422	0.00498008	0.303785	0.49004	0	0	0.061753		T	0.848606	0.998008	0.393426	0.797809	0.957171	0.311753	0.993028	0.965139	0.987052	0.978088		T	0.949203	0.849602	0.946215	0.952191	0.978088	0.461155	0.98506	0.905378	0.986056	1		T	0.298805	0.403386	0.993028	0.698207	0.85259	0.898406	0.748008	0.98506	0.993028	0.422311		T	0.968127
S	0.99004	0.858566	0.227092	0.530876	0.833665	0.832669	0.538845	1	0.00298805	0.214143		S	0.989044	0.444223	0.999004	0.663347	0.848606	0.875498	0.288845	0.823705	1	0.989044		S	0.288845	0.846614	0.99004	0.988048	0.471116	0.364542	0.399402	0.994024	0.114542	0.74502		S	0.00498008	0.515936	1	0.765936	0.997012	0.889442	0.515936	1	0.99502	1		S	0.984064
G	0.662351	0.856574	0.0657371	0.537849	0.992032	0.947211	0.993028	1	0.743028	0.0229084		G	0.166335	0.793825	0.0328685	0.203187	0.168327	0.752988	0.165339	0.0498008	1	0.503984		G	0.378486	0.146414	0.456175	0.0249004	0.458167	0.610558	0.487052	0.378486	0.0159363	0.914343		G	0.545817	0.714143	1	1	1	0.982072	0.986056	0.704183	0.916335	0.983068		G	0.0109562
P	0.704183	0.964143	0.967131	0.906375	0.355578	0.596614	0.683267	1	0.998008	0.99004		P	0.945219	1	1	1	0.986056	0.991036	1	0.999004	1	0.356574		P	0.239044	0.89741	0.715139	0.74004	0.371514	0.479084	0.0119522	0	0	0		P	0.0059761	0.0358566	0.0408367	0.174303	0	0.163347	0.106574	0.000996016	0	0		P	0.0458167
Q	0.836653	0	0	0.0059761	0.0149402	0.0059761	0.827689	0	0.00199203	0.97012		Q	0.781873	0.968127	0.624502	0.978088	0.530876	0.983068	0.267928	0.321713	1	0.979084		Q	0.229084	0.921315	0.2749	0.0557769	0.427291	0.775896	0.672311	0.9751	0.592629	0.908367		Q	1	0.894422	0.996016	0.932271	0.967131	0.827689	0.535857	0.665339	0.541833	0.910359		Q	0.969124
N	0.429283	0.130478	0.629482	0.201195	0.829681	0.761952	0.261952	0.108566	0.571713	0.86753		N	0.288845	0.714143	0.27988	0.566733	0.679283	0.11255	0.322709	0.0677291	0.128486	0.584661		N	0.432271	0.648406	0.0577689	0.0318725	0.521912	0.36753	0.0707171	0.233068	0.62749	0.111554		N	0.783865	0.921315	0.311753	0.37749	0.272908	0.0737052	0.196215	0.393426	0.690239	0.963147		N	0.838645
H	0.00398406	0.349602	0.674303	0.11753	0.188247	0	0.224104	0	0.0209163	0.302789		H	0.498008	0.111554	0.0129482	0.394422	0.000996016	0.72012	0.203187	0.533865	1	0.839641		H	0.00199203	0	0	0	0	0.131474	0.349602	0.0388446	0	0		H	0.997012	0.99004	1	0.998008	0.984064	1	0.89243	0.727092	0.999004	0.996016		H	1
C	0	0.156375	0.0258964	0.948207	0.4751	0.871514	0.85757	0.620518	0.498008	0.572709		C	0.451195	0.35757	0.659363	0.751992	0.339641	0.205179	0.870518	0.99502	1	0.953187		C	0.859562	0.99004	0.668327	0.976096	0.561753	0.711155	0.956175	0.472112	0.922311	1		C	0.422311	0.540837	0.999004	0.968127	0.9751	0.910359	0.634462	0.989044	0.994024	0.339641		C	0.534861
K	0.00697211	0.0836653	0.773904	0.283865	0.170319	0.780876	0.239044	0.00498008	0.126494	0.866534		K	0.418327	0.293825	0.590637	0.160359	0.946215	0.512948	0.594622	0.223108	0	0.50498		K	0.999004	0.893426	0.916335	0.790837	0.601594	0.0139442	0.548805	0.681275	0.498008	0.936255		K	0.292829	0.278884	0	0	0	0	0.0448207	0	0	0.0278884		K	0.73008
R	0.241036	0.418327	0.916335	0.776892	0.98008	0	0.000996016	0.0219124	0.955179	0.399402		R	0.0119522	0.424303	0.635458	0.971116	0.823705	0.0139442	0.353586	0.684263	0	0		R	0.286853	0.999004	1	0.961155	0.98506	0.644422	0.997012	0.983068	1	0.993028		R	0.154382	0.613546	0	0.000996016	0	0.00199203	0.00697211	0	0.00398406	0		R	0.0159363
E	0.510956	0.723108	0.62749	0.346614	0.792829	0.938247	0.900398	0.878486	0.399402	0.309761		E	0.319721	0	0.131474	0.00298805	0.120518	0.378486	0.271912	0.00697211	1	0.649402		E	0.871514	0.904382	0.875498	0.578685	0.109562	0.0866534	0.736056	0.893426	0.312749	1		E	0	0.000996016	0	0	0	0	0	0	0.0159363	0.00199203		E	0.0697211
D	0.918327	0.904382	0.105578	0.968127	0.386454	0.949203	0.179283	0.0368526	0.224104	0.00896414		D	0.606574	0.252988	0.312749	0.0547809	0.123506	0.0388446	0.00199203	0.0368526	1	0.918327		D	0.146414	0.521912	0.211155	0.539841	0.0577689	0.37749	0.0169323	0.714143	0.063745	0.227092		D	0	0.0677291	0.0378486	0	0.00896414	0.000996016	0.713147	0.0358566	0.449203	0.359562		D	0.375498
*	0.978088	0.885458	0.818725	0.585657	0.0179283	0.0667331	0.288845	1	0.542829	0.00996016		*	0.955179	0.981076	0.85259	0.841633	0.619522	0.0179283	0.0747012	0.256972	1	0.502988		*	0.0856574	0.963147	0.961155	0.859562	0.821713	0.591633	0.0258964	0.0836653	0.302789	1		*	0.466135	0.0438247	0	0	0	0	0.00398406	0.00199203	0.0109562	0		*	0.00697211
[truncated: 8 more columns]

## Sheet: Heatmap for aminoacids in sites
Stop efficiency at the corresponging amino acid residue while located in the ribosome sites							P-values for shuffled datasets exceeding experimental data of stop efficiency at the corresponging triplet while located in the ribosome sites
	Ribosome sites							Ribosome sites
	-2	E	P	A	2			-2	E	P	A	2
W	0.00128036	0.0040621	0.00736613	0.0105855	0.00268626		W	0.929283	0.582669	0.00398406	0	0.175299
Y	0.0021603	0.00889947	0.0208324	-0.0101059	-0.00455871		Y	0.793825	0	0	1	0.999004
F	0.000917223	0.00976613	0.0162737	-0.00750629	0.000414282		F	0.809761	0	0	1	0.615538
I	0.00551932	0.0155955	0.00132945	-0.00448689	-0.00542377		I	0.0258964	0	0.895418	1	1
L	0.00172183	0.0082389	0.00950073	-0.00700356	0.000507507		L	0.988048	0	0	1	0.712151
V	0.0105677	0.0165862	0.00111867	-0.00433095	-0.00130075		V	0	0	1	1	0.991036
M	0.00111029	0.00377632	0.00813617	-0.00490824	-0.00233748		M	0.826693	0.598606	0.0139442	0.998008	0.932271
A	0.00170832	-0.000625489	-0.000990235	-0.00141379	-0.000877286		A	1	1	1	1	0.997012
T	0.00686157	0.000965039	-0.0010892	-0.00114456	-0.00130479		T	0	1	1	0.998008	1
S	0.0020167	-0.000912138	0.00266188	-0.00155895	0.000327765		S	0.992032	1	0.967131	1	0.824701
G	0.000635957	0.00264308	0.00477232	-0.00271462	-0.000129332		G	1	1	0.138446	1	0.949203
P	0.00122495	8.90457e-05	0.00577197	0.00465825	0.000571095		P	1	1	0	0	0.7749
Q	0.0108974	-0.000606157	0.00312449	-0.00428616	0.00122281		Q	0	1	0.791833	1	0.471116
N	0.00383975	0.00566398	0.00622444	0.00117462	0.000583094		N	0.239044	0.168327	0.0199203	0.494024	0.634462
H	0.00939805	0.0047801	0.0168609	-0.00748598	-0.000180986		H	0	0.262948	0	1	0.838645
C	0.00413634	0.000731396	-0.00074113	-0.00366738	0.00131607		C	0.133466	1	1	1	0.364542
K	0.00685817	0.00783746	-0.000832801	0.0201624	0.000798953		K	0.000996016	0.00896414	0.99502	0	0.624502
R	0.00417597	0.0116649	0.000487643	0.00592582	0.00393145		R	0.0766932	0	1	0	0
E	0.00144846	0.00770289	0.00166023	0.0207951	0.00458375		E	0.915339	0.00298805	0.958167	0	0.0129482
D	0.00289254	0.00463524	0.0071103	0.00747011	0.00195347		D	0.553785	0.456175	0.0149402	0	0.189243
*	0	0	0	0.0226502	0.00520549		*	0.994024	1	0.996016	0	0.00298805

## Sheet: 2D aminoacid heatmap
2-dimensional representation of stalling propensities with the corresponding aminio acid residue located in the P- and A-sites																							2-dimensional representation of stalling propensities with the corresponding aminio acid residue located in the E- and A-sites																							2-dimensional representation of stalling propensities with the corresponding aminio acid residue located in the E- and P-sites
P\A	Amino acid residues located in the A-site																						E\A	Amino acid residues located in the A-site																						E\P	Amino acid residues located in the P-site
	W	Y	F	I	L	V	M	A	T	S	G	P	Q	N	H	C	K	R	E	D	*			W	Y	F	I	L	V	M	A	T	S	G	P	Q	N	H	C	K	R	E	D	*			W	Y	F
W	0.00590526	-0.00387688	-0.00463569	-0.00868206	-0.00953474	0.000434293	-0.0392138	-0.00494757	0.000695919	0.00424729	-0.00115211	-0.00367058	-0.00508223	0.0210182	-0.0125857	-0.0101946	0.0389412	0.0166652	0.0478602	0.00596138	0.044851		W	0.00491711	0.012529	0.00646419	0.000266139	-0.00114842	-0.00153753	0.00697777	-0.0021749	0.00315177	0.00617403	0.0167792	0.0193851	0.0144957	0.00726802	-0.0112198	-0.0149527	0.0100294	-0.00566191	0.019489	-0.00437979	0.0179072		W	0.014413	0.00687834	0.00460263
Y	0.0688019	-0.00273162	0.00825022	0.0140853	0.00189161	0.000439534	-0.018941	0.0042149	-0.00497162	0.00442641	-0.0115859	0.0192921	0.00727273	0.0142597	0.000629855	-0.00153929	0.0798985	0.0271517	0.0633375	0.0166472	0.0903424		Y	-0.00327428	-0.00532961	-0.00857791	0.0238028	-0.00125338	-0.0018984	-0.0155486	-0.00328734	-0.000152939	0.00202165	0.0048348	0.0157075	0.0114841	0.00322214	-0.0182483	-0.00961951	0.00481846	0.0021221	0.0598327	0.0438463	0.0889821		Y	0.0293902	0.0389887	0.0177726
F	0.0336514	-0.000188498	-0.00356645	0.00891347	0.00273071	0.0024921	-0.0132491	0.00305888	-0.000703961	0.00373228	-0.00535368	0.0115869	0.00172953	0.0186731	0.0110702	-0.00184154	0.0322419	0.0296915	0.0445224	0.0148179	0.0653856		F	0.00880009	-0.00612464	-0.0156632	0.0203674	0.00108557	-0.000842816	-0.0217615	0.00759017	0.00445139	0.00966121	-0.00527935	0.00783405	-0.00162032	0.0412417	0.00957667	-0.00159182	0.0250882	0.00868715	0.0914686	0.0166634	0.0668635		F	0.00824032	0.0513701	0.0391671
I	0.00782419	-0.0150346	-0.00809098	0.00245205	-0.0127793	-0.00955626	-0.0124335	-0.0125064	-0.0117256	-0.00841314	-0.00999808	0.00963652	-0.00606268	0.00458424	-0.0115807	0.00513397	0.015183	0.0116502	0.0107609	0.000720143	0.0399462		I	0.0223875	-0.00733122	-0.0118274	0.023476	0.0100196	-0.00239685	0.000130433	-0.0034225	-0.000842847	-0.0118105	-0.00452479	0.00152149	-0.0040897	0.0132956	-0.00613394	-0.00073414	0.0351772	0.0274361	0.045434	0.0131487	0.0767639		I	0.0396043	0.0423249	0.0511948
L	0.0189292	-0.0153052	-0.0123166	0.010284	-0.0022699	-0.00243091	-0.0109567	-0.000509179	0.00275491	-0.00294633	-0.00232365	0.00481303	0.00440647	0.00202789	-0.0084678	-0.00922776	0.0545938	0.0128306	0.0272575	0.015544	0.0321352		L	0.0306174	-0.0125956	-0.00622036	0.00649677	-0.00442412	-0.00129841	-0.00297796	-0.00234364	-0.00325053	-0.00232269	-0.00241196	0.00106779	-0.00102564	0.0110125	-0.00770302	3.22601e-05	0.0331177	0.00311028	0.031659	0.0216819	0.0541134		L	0.0305191	0.0350208	0.0195554
V	0.00688515	-0.00915085	-0.0123603	-0.00643539	-0.00715518	-0.00369444	-0.00845823	-0.00107739	-0.00134972	-0.00275604	-0.00015188	0.000911901	-0.00109386	-0.000276597	-0.0133646	-0.00419411	0.00573415	0.00107657	0.0167298	0.00237733	0.0352418		V	0.0216915	-0.00265218	-0.00917556	0.0250336	0.00462174	-0.0013992	0.00484475	-0.00230303	0.00125588	-0.000638101	-0.00358859	0.00247345	-0.00265925	0.0257697	-0.00294994	-0.00316142	0.059022	0.0311471	0.0508347	0.0241835	0.065472		V	0.0418456	0.0718307	0.0502435
M	0.00298546	-0.0352662	0.0128545	0.0053984	0.000662958	0.00203747	0.019693	0.00624534	0.00591011	-0.000928255	-0.00210771	-0.00170677	0.00281963	-0.0196718	0.000755239	-0.00194549	0.00630642	0.0171438	0.0190699	0.022909	0.0475705		M	-0.00157736	-0.0102966	0.0128451	-0.0167219	-0.00956408	-0.00112047	-0.0262638	0.00343467	-0.0110695	8.28187e-05	-0.00626836	0.00901178	0.0183885	-0.00829298	-0.0175034	0.00347294	0.0198044	0.00467053	0.0414244	0.0221054	0.0378756		M	0.00951842	0.0417971	0.0308667
A	-0.00157754	-0.00253447	-0.00856729	-0.00413479	-0.00992426	-0.00297818	0.00274725	-0.00110493	-0.00502062	-0.00354428	-0.0035573	-0.00419715	-0.00738683	0.00859769	-0.00671339	-0.0138253	0.0158449	0.00271916	0.00966162	-0.000566369	0.00112171		A	0.00873872	-0.0033774	-0.00986764	-0.0089457	-0.00438993	-0.00656675	-0.015495	-0.00127285	0.000553696	-0.0039477	-0.00411997	0.0147934	-0.0039806	0.000127692	-0.00388022	0.00460701	-0.00217125	-0.00478431	0.00610359	0.00086491	0.036166		A	4.92631e-05	-0.00420225	-0.00184846
T	0.00357609	-0.0122313	-0.00819702	-0.00720213	-0.00875192	-0.00349282	-0.0200047	-0.00533074	-0.0101358	-0.00420632	-0.00302725	-0.00647232	-0.00647956	0.00236478	-0.00156359	-0.00316848	0.000331216	0.00107592	0.0139031	0.00819161	0.0342841		T	0.0100602	-0.0069254	-0.00974347	-0.00691143	-0.0156007	-0.0100312	2.31968e-06	0.000244953	-0.00095401	-0.00147796	-0.00731829	-0.00260838	-0.00571778	0.00309537	-0.00410205	-0.000999842	0.0223692	-5.00431e-05	0.0166332	0.00758044	0.0241139		T	0.00916889	0.0172085	0.00430733
S	0.00881651	0.00249163	-0.0132282	-0.00380453	-0.0073258	-0.00257358	0.000295512	-0.00367434	0.000107322	-0.00541061	-0.00254238	0.000392636	-5.91637e-05	0.00483573	-0.00936553	-0.0011315	0.0197089	0.00466865	0.0224592	-0.00558172	0.0149268		S	0.00592443	-0.00318999	-0.00778228	-0.0108226	-0.00626273	-0.00312814	-0.00475318	-0.00188897	-0.00197268	-0.00266746	-0.00248013	0.00932491	0.00407301	-0.00522316	-0.00546669	-0.0127805	-0.00981104	-0.00267143	0.0139197	0.00224089	0.0211453		S	-0.00461967	0.00471742	-0.00479967
G	0.0184871	-0.004134	-0.00621739	-0.00302048	-0.00739497	-0.00676232	-0.00815101	-0.000268146	-0.00484387	0.000436061	0.000802864	0.00320212	-0.00628853	0.00548255	-0.00617868	0.00112426	0.0280895	0.00799123	0.0236725	0.0153928	0.0236128		G	0.0132735	-0.00551818	-0.0084532	-0.000106913	-0.00444507	0.00013106	0.00494803	-0.000461931	0.000215554	0.00555124	0.00195847	0.0114671	-0.00237016	-0.00100474	-0.000364411	-0.00228185	0.00116113	0.00122562	0.0131886	0.00523211	0.0349312		G	0.00113817	-0.00347649	-0.00291591
P	0.00245501	-0.00868663	-0.00687807	-0.00171768	-0.00853312	-0.00485892	0.00672655	-0.00286703	0.00191596	-0.00234804	-0.0037712	0.0252121	-0.00482396	0.00135694	-0.00572007	-0.00717284	0.00284972	-0.00155105	0.0160218	0.00721649	0.0138192		P	-0.00414171	-0.0131201	-0.00545477	0.00231114	-0.0107575	-0.00322422	-0.00417238	-0.00855422	-0.00269287	-0.00691654	-0.00606466	0.000552056	-0.00306194	0.00253971	-0.00850593	-0.00698422	0.0197003	0.00137543	0.0286558	0.00754611	-0.000151784		P	0.00119353	0.0214666	0.0133917
Q	0.0158237	-0.0140575	-0.0137075	0.00170974	-0.00937201	-0.00541085	0.00492296	-0.00587694	-0.000525196	0.00296259	-0.00632865	-0.00331361	-0.0138589	0.00147694	-0.0123334	-0.00501808	0.0220377	0.0154474	0.0115533	0.00420518	0.0527161		Q	0.0144238	-0.0109755	-0.0199049	-0.005088	-0.0100606	-0.00359185	-2.77642e-05	-0.00155171	-0.0105907	-0.00852696	-0.00274737	0.010399	-0.00600336	-0.00492692	-0.00894287	0.0011699	0.0111295	0.00295892	0.0110036	-0.00214252	0.0155534		Q	-0.000347113	0.00571464	0.00858855
N	0.0123366	-0.0189294	-0.0197111	0.0027464	0.000655273	0.00150615	-0.0137019	-0.0032887	0.00562798	-0.00639311	-0.00311403	0.00325392	-0.00882816	0.00373853	-0.0109303	-0.000973705	0.034743	0.00876709	0.0213624	0.00234157	0.0763535		N	0.00371338	-0.00392079	-0.00603505	-0.00103573	-0.00601483	-0.00840171	-0.0206515	-0.00597486	-0.000314879	-0.0015436	0.00506879	0.000389899	-0.00597768	0.00710109	0.00291067	-0.00081774	0.0398305	0.0122211	0.0104531	0.02426	0.0371556		N	0.0228325	0.0259214	0.0143001
H	0.0341331	-0.0160705	-0.0109048	0.0170188	0.00254335	-0.00214529	-0.00962915	-0.000860529	0.00633591	0.00141423	-0.00719145	0.0141986	0.00518462	0.0155505	-0.00486124	-0.004997	0.0900595	0.030703	0.0669355	0.0254327	0.0801692		H	0.0200079	-0.00762052	-0.00538518	0.0123277	-0.00420385	-0.00123927	0.00690348	0.00405017	0.00136014	0.00402339	-0.00342718	0.00537471	-0.00134812	0.0168587	-0.0050614	-0.00604307	0.0252684	0.00767847	0.0283176	0.00703805	0.0546826		H	-0.00973329	0.00904619	0.026718
C	-0.000385628	-0.0231579	-0.0114568	-0.00964124	-0.0074106	-0.0126939	0.00554335	-0.0063673	-0.00817096	-0.00281288	-0.000392997	-0.00672918	-0.00970781	0.00491853	-0.00477194	-0.00141744	0.0206094	6.53952e-05	0.0329401	0.0180245	0.0256515		C	-0.000830022	-0.00525693	-0.00332091	0.000568482	-0.010322	0.00249987	0.00568986	-0.000897464	0.00191313	-0.00785525	-0.00688529	0.01027	0.00948054	0.0132014	-0.00719459	0.00871511	-0.0160088	-0.000145885	0.0118712	0.00265466	0.0418086		C	-0.00481829	0.0133248	0.0163195
K	0.0137292	-0.0141208	-0.00520287	-0.00476034	-0.00762695	0.00431984	-0.011842	0.00567976	-0.00119631	-0.00472567	-0.0105791	-0.000929306	-0.0121557	-0.0154208	-0.00966829	0.0126071	-0.00332786	0.00117958	0.00978008	0.0210473	0.00680691		K	-0.000355937	-0.0209733	-0.00957569	-0.010711	-0.0100732	-0.00269861	-0.0048289	-0.00907762	-0.00672487	-0.00343533	-0.00898797	-0.00989744	-0.00183235	0.00609627	-0.00970754	-0.0117478	0.072069	0.0342817	0.00375474	-0.0029757	0.00937327		K	0.0160049	0.0510075	0.0175276
R	0.00302471	-0.00800525	-0.00744266	-0.00680608	-0.00682297	-0.00476445	-0.0102381	-0.00452578	-0.00422257	-0.00426875	-0.00491594	-0.00167293	-0.00238858	-0.0152827	-0.0100815	-0.00584452	0.0210325	0.00415759	0.0158023	0.00036337	-0.00738458		R	0.0143761	-0.00914497	-0.0110882	-0.00725821	-0.0109135	-0.00580901	-0.0109195	-0.00570106	-0.00587367	-0.00380031	-0.00540815	-0.00275266	-0.00706451	-0.0113307	-0.011249	-0.0114107	0.0924329	0.0325398	0.0174769	-0.00092175	0.00800294		R	0.0217437	0.0427514	0.0503717
E	0.0191126	-0.0203771	-0.0187168	-0.00442886	-0.0043935	-0.00933974	-0.00217382	-0.000468983	0.0109914	-0.00342484	0.000428019	0.00322328	-0.0102119	0.00279941	-0.00400632	0.00834708	0.00666071	0.00202976	0.00381838	-0.00248655	0.0197457		E	0.0171442	-0.00992732	0.000714121	0.0109217	-0.00725192	-0.000889999	0.00444887	0.00156264	0.0149763	0.00432676	0.0176976	0.0233367	-0.0156648	0.0179661	0.00121616	-0.00500092	0.0150139	0.00318331	0.0236101	0.0299337	0.0337998		E	0.0264624	0.0174844	0.0106442
D	0.0302915	0.00951037	-0.00448432	-0.00297982	-0.0114378	-0.00191384	0.00902404	-0.00176727	0.00694415	-0.00278335	-0.00197996	0.00631604	0.0134358	0.000105015	-0.00189871	0.00285568	0.0240112	0.00587578	0.0178205	0.011344	0.0558416		D	0.00578135	-0.00592835	-0.00687486	0.00145708	0.00121155	-0.00429836	0.069422	0.00205833	0.0144106	-0.00334455	0.00374026	0.0187053	0.00936071	0.00652006	-0.00579134	0.00377224	6.42614e-05	0.00263621	0.0396321	0.000904206	0.0249416		D	0.00266201	0.00953569	0.00911349
*	N/A	N/A	N/A	N/A	N/A	N/A	N/A	N/A	N/A	N/A	N/A	N/A	N/A	N/A	N/A	N/A	N/A	N/A	N/A	N/A	N/A		*	N/A	N/A	N/A	N/A	N/A	N/A	N/A	N/A	N/A	N/A	N/A	N/A	N/A	N/A	N/A	N/A	N/A	N/A	N/A	N/A	N/A		*	N/A	N/A	N/A
[truncated: 40 more columns]

[truncated: 1 more sheets: P-value 2D aminoacid heatmap]
